# Supplementary material for: S66x8 noncovalent interactions revisited: new benchmark and performance of composite localized coupled-cluster methods
Source: Royal Society of Chemistry journal article supplement (doi:10.1039/d2cp03938a), 2022-01-01
Supplement: d2cp03938a1.zip [file DLPNO-CCSD_T1 based methods v2.xlsx]

## Sheet: NormalPNO
100		NormalPNO			NormalPNO			NormalPNO			NormalPNO			NormalPNO																exp	3.22		0.897563	0.938323	0.917744	0.929278	0.992425	0.960388
		DLPNO-CCSD(T1)/haVQZ			DLPNO-CCSD(T1)/haVTZ			DLPNO-CCSD(T1)/haV{T,Q}Z			Normal/{T,Q} + c1[Tight-Normal]/T			Normal/{T,Q} + c1[Tight{6,7}-Normal]/T																coeff	0.655634
		RAW	CP	Half	RAW	CP	Half	RAW	CP	Half	RAW	CP	Half	0	0	0
MAD	Full	0.226958	0.230704	0.222268	0.356098	0.326323	0.292651	0.176191	0.186882	0.180613	0.0730024	0.0638403	0.0677593	0.0516506	0.0463351	0.0470283
RMSD	Full	0.367588	0.353091	0.34217	0.603599	0.515042	0.453126	0.26735	0.285998	0.274741	0.104077	0.0910445	0.0963423	0.0715374	0.0652072	0.0666002
	H bonds	0.308947	0.504244	0.405297	0.264184	0.799181	0.524754	0.344597	0.316323	0.330325	0.123758	0.100812	0.111789	0.0623762	0.0408149	0.048619
	pi stack	0.7368	0.417351	0.569934	1.29649	0.317845	0.770448	0.392	0.499885	0.445502	0.148288	0.133557	0.139002	0.099699	0.0979077	0.0968807
	London	0.186213	0.152258	0.14318	0.412955	0.263202	0.195968	0.133364	0.126052	0.123763	0.0760244	0.0730067	0.0727468	0.0804098	0.0679011	0.0740071																													5_S66x8/DLPNO-CCSDT1-S66x8/DLPNO-CCSDT1-haVQZ-Normal		5_S66x8/DLPNO-CCSDT1-S66x8/DLPNO-CCSDT1-haVTZ-Normal
	mixed	0.20472	0.132931	0.148378	0.41097	0.218362	0.198936	0.105895	0.140345	0.120948	0.0581476	0.0573004	0.0561966	0.0569298	0.0657722	0.0605478
																					Association
		δΔΕ	δΔΕ	δΔΕ	δΔΕ	δΔΕ	δΔΕ	δΔΕ	δΔΕ	δΔΕ	δΔΕ	δΔΕ	δΔΕ	δΔΕ	δΔΕ	δΔΕ					ΔΕ	ΔΕ	ΔΕ	ΔΕ	ΔΕ	ΔΕ																		Missing	0	0	0	0
		DLPNO-CCSD(T1)/haVQZ			DLPNO-CCSD(T1)/haVTZ			DLPNO-CCSD(T1)/haV{T,Q}Z			Normal/{T,Q} + c1[Tight-Normal]/T			Normal/{T,Q} + c1[Tight{6,7}-Normal]/T							DLPNO-CCSD(T1)/haVQZ			DLPNO-CCSD(T1)/haVTZ						DLPNO-CCSD(T1)/haV{T,Q}Z			Normal/{T,Q} + c1[Tight-Normal]/T			Normal/{T,Q} + c1[Tight{6,7}-Normal]/T									Dimers
																																													Normal		Normal
REF	systems	RAW	CP	Half	RAW	CP	Half	RAW	CP	Half	RAW	CP	Half	0	0	0					RAW	CP	Half	RAW	CP	Half				RAW	CP	Half	RAW	CP	Half	0	0	0					systems	list-s66x8-output-dimer.csv	DLPNO-CCSD(T1)/ haVQZ	HF/ haVQZ	DLPNO-CCSD(T1)/ haVTZ	HF/haVTZ
4.66552	01_Water-Water_0.90_dimer.out	0.133212	0.315287	0.224249	0.120281	0.569968	0.345125	0.141689	0.14831	0.145	0.0554384	0.0466948	0.0512112	0.025544	0.00452752	0.0154124					4.53231	4.35024	4.44128	4.54524	4.09556	4.3204				4.52384	4.51721	4.52053	4.61009	4.61883	4.61431	4.63998	4.661	4.65011					01_Water-Water_0.90_dimer.out	01_Water-Water_0.90.xyz	-152.734	-152.136	-152.69	-152.125
4.95383	01_Water-Water_0.95_dimer.out	0.111685	0.264525	0.188105	0.0926649	0.477689	0.285177	0.124155	0.124768	0.124461	0.0511682	0.0385016	0.0449603	0.0296236	0.00782164	0.0190279					4.84215	4.68931	4.76573	4.86117	4.47614	4.66866				4.82968	4.82906	4.82937	4.90266	4.91533	4.90887	4.92421	4.94601	4.9348					01_Water-Water_0.95_dimer.out	01_Water-Water_0.95.xyz	-152.735	-152.137	-152.691	-152.126
4.94643	01_Water-Water_1.00_dimer.out	0.0926185	0.223003	0.157811	0.0634456	0.39293	0.228188	0.111745	0.111593	0.111669	0.0496376	0.0389249	0.0443798	0.0229934	0.00524288	0.0143491					4.85382	4.72343	4.78862	4.88299	4.5535	4.71825				4.83469	4.83484	4.83477	4.8968	4.90751	4.90205	4.92344	4.94119	4.93209					01_Water-Water_1.00_dimer.out	01_Water-Water_1.00.xyz	-152.735	-152.137	-152.691	-152.126
4.76207	01_Water-Water_1.05_dimer.out	0.0813011	0.192135	0.136718	0.0366883	0.320535	0.178612	0.110551	0.107952	0.109251	0.0600071	0.0479067	0.0540471	0.0363474	0.0182046	0.0274825					4.68077	4.56994	4.62535	4.72538	4.44154	4.58346				4.65152	4.65412	4.65282	4.70207	4.71417	4.70803	4.72573	4.74387	4.73459					01_Water-Water_1.05_dimer.out	01_Water-Water_1.05.xyz	-152.734	-152.137	-152.691	-152.126
4.47984	01_Water-Water_1.10_dimer.out	0.070355	0.164506	0.11743	0.0162506	0.260623	0.138437	0.105828	0.101488	0.103658	0.0611215	0.0489315	0.0551002	0.0411468	0.0229531	0.0322348					4.40948	4.31533	4.36241	4.46359	4.21921	4.3414				4.37401	4.37835	4.37618	4.41872	4.43091	4.42474	4.43869	4.45688	4.4476					01_Water-Water_1.10_dimer.out	01_Water-Water_1.10.xyz	-152.734	-152.137	-152.69	-152.126
3.4705	01_Water-Water_1.25_dimer.out	0.108053	0.165705	0.136879	0.0411775	0.200882	0.12103	0.151898	0.142643	0.14727	0.0728819	0.0544816	0.0637602	0.0614586	0.0378301	0.0498222					3.36244	3.30479	3.33362	3.42932	3.26961	3.34947				3.3186	3.32785	3.32323	3.39761	3.41601	3.40674	3.40904	3.43267	3.42067					01_Water-Water_1.25_dimer.out	01_Water-Water_1.25.xyz	-152.732	-152.136	-152.688	-152.125
2.11656	01_Water-Water_1.50_dimer.out	0.0393087	0.0698867	0.0545977	0.0109263	0.0747569	0.0319153	0.0722445	0.0666936	0.069469	0.0437114	0.0324899	0.0381549	0.0403779	0.0272649	0.0339244					2.07726	2.04668	2.06197	2.12749	2.04181	2.08465				2.04432	2.04987	2.0471	2.07285	2.08407	2.07841	2.07619	2.0893	2.08264					01_Water-Water_1.50_dimer.out	01_Water-Water_1.50.xyz	-152.73	-152.134	-152.686	-152.124
0.874474	01_Water-Water_2.00_dimer.out	0.00942041	0.0198826	0.0146515	0.0195811	0.0134398	0.00307065	0.0284348	0.0241068	0.0262708	0.0251063	0.0184712	0.0218131	0.023331	0.0164864	0.0199462					0.865054	0.854592	0.859823	0.894055	0.861034	0.877545				0.846039	0.850367	0.848203	0.849368	0.856003	0.852661	0.851143	0.857988	0.854528					01_Water-Water_2.00_dimer.out	01_Water-Water_2.00.xyz	-152.728	-152.133	-152.684	-152.122
5.29836	02_Water-MeOH_0.90_dimer.out	0.154853	0.385306	0.27008	0.13155	0.700923	0.416237	0.170131	0.178377	0.174254	0.0538752	0.0517828	0.0529102	0.00957989	0.0064559	0.00185787					5.14351	4.91306	5.02828	5.16681	4.59744	4.88213				5.12823	5.11999	5.12411	5.24449	5.24658	5.24545	5.28878	5.30482	5.29651					02_Water-MeOH_0.90_dimer.out	02_Water-MeOH_0.90.xyz	-191.964	-191.169	-191.911	-191.156
5.62873	02_Water-MeOH_0.95_dimer.out	0.148093	0.343106	0.245599	0.117676	0.603784	0.36073	0.168035	0.172196	0.170115	0.0602822	0.0540218	0.0572364	0.0248276	0.00594167	0.0156709					5.48064	5.28563	5.38313	5.51106	5.02495	5.268				5.4607	5.45654	5.45862	5.56845	5.57471	5.5715	5.60391	5.62279	5.61306					02_Water-MeOH_0.95_dimer.out	02_Water-MeOH_0.95.xyz	-191.965	-191.171	-191.911	-191.158
5.62675	02_Water-MeOH_1.00_dimer.out	0.119464	0.285512	0.202488	0.0829074	0.500318	0.291613	0.143432	0.144679	0.144055	0.0593638	0.0501797	0.0548628	0.0274332	0.0065948	0.0173011					5.50729	5.34124	5.42427	5.54385	5.12644	5.33514				5.48332	5.48207	5.4827	5.56739	5.57657	5.57189	5.59932	5.62016	5.60945					02_Water-MeOH_1.00_dimer.out	02_Water-MeOH_1.00.xyz	-191.965	-191.171	-191.911	-191.158
5.42332	02_Water-MeOH_1.05_dimer.out	0.100136	0.24333	0.171733	0.0618829	0.419618	0.24075	0.125217	0.12775	0.126483	0.0503253	0.0448664	0.0476628	0.0182513	0.00330157	0.0109946					5.32318	5.17999	5.25159	5.36144	5.0037	5.18257				5.2981	5.29557	5.29684	5.373	5.37845	5.37566	5.40507	5.42002	5.41233					02_Water-MeOH_1.05_dimer.out	02_Water-MeOH_1.05.xyz	-191.965	-191.171	-191.911	-191.158
5.10642	02_Water-MeOH_1.10_dimer.out	0.0913479	0.215783	0.153565	0.0413168	0.347985	0.194651	0.12415	0.129107	0.126628	0.0586622	0.0583967	0.0585686	0.0307759	0.0223707	0.0267331					5.01507	4.89063	4.95285	5.0651	4.75843	4.91177				4.98227	4.97731	4.97979	5.04775	5.04802	5.04785	5.07564	5.08405	5.07968					02_Water-MeOH_1.10_dimer.out	02_Water-MeOH_1.10.xyz	-191.964	-191.171	-191.91	-191.158
3.95632	02_Water-MeOH_1.25_dimer.out	0.0800741	0.158001	0.119037	0.0802294	0.273755	0.176992	0.0799723	0.0821087	0.0810405	0.026332	0.0285644	0.0274298	0.0423316	0.0508147	0.0464749					3.87625	3.79832	3.83728	3.87609	3.68257	3.77933				3.87635	3.87421	3.87528	3.98265	3.98489	3.98375	3.99865	4.00714	4.0028					02_Water-MeOH_1.25_dimer.out	02_Water-MeOH_1.25.xyz	-191.962	-191.17	-191.909	-191.157
2.39149	02_Water-MeOH_1.50_dimer.out	0.0490783	0.0928045	0.0709414	0.0195946	0.112775	0.0661847	0.0684088	0.0797114	0.0740601	0.0180075	0.0247494	0.0214145	0.0130147	0.0166735	0.0149343					2.34241	2.29869	2.32055	2.3719	2.27872	2.32531				2.32308	2.31178	2.31743	2.37348	2.36674	2.37008	2.37848	2.37482	2.37656					02_Water-MeOH_1.50_dimer.out	02_Water-MeOH_1.50.xyz	-191.96	-191.168	-191.906	-191.155
0.954245	02_Water-MeOH_2.00_dimer.out	0.0106892	0.0254897	0.0180894	0.000181082	0.0273281	0.0135735	0.0178161	0.0242843	0.0210502	0.00690932	0.0130246	0.00996779	0.00370953	0.00929378	0.00650749					0.943556	0.928756	0.936156	0.954427	0.926917	0.940672				0.936429	0.929961	0.933195	0.947336	0.941221	0.944278	0.950536	0.944952	0.947738					02_Water-MeOH_2.00_dimer.out	02_Water-MeOH_2.00.xyz	-191.958	-191.166	-191.904	-191.153
6.60638	03_Water-MeNH2_0.90_dimer.out	0.150564	0.358627	0.254595	0.149285	0.702281	0.425783	0.151404	0.133315	0.142359	0.0449153	0.0124602	0.0288158	0.00379822	0.0427588	0.0191091					6.45582	6.24776	6.35179	6.4571	5.9041	6.1806				6.45498	6.47307	6.46402	6.56147	6.59392	6.57757	6.60258	6.64914	6.62549					03_Water-MeNH2_0.90_dimer.out	03_Water-MeNH2_0.90.xyz	-172.104	-171.332	-172.056	-171.321
6.95721	03_Water-MeNH2_0.95_dimer.out	0.137629	0.310217	0.223923	0.125292	0.59893	0.362111	0.145718	0.120927	0.133322	0.0510907	0.0152219	0.0332516	0.0156168	0.0321263	0.00796209					6.81958	6.64699	6.73329	6.83192	6.35828	6.5951				6.81149	6.83629	6.82389	6.90612	6.94199	6.92396	6.9416	6.98934	6.96517					03_Water-MeNH2_0.95_dimer.out	03_Water-MeNH2_0.95.xyz	-172.105	-171.334	-172.057	-171.322
6.94056	03_Water-MeNH2_1.00_dimer.out	0.125671	0.272163	0.198917	0.106204	0.512465	0.309335	0.138435	0.114612	0.126523	0.0522968	0.0180836	0.0352803	0.0186868	0.0259048	0.00334543					6.81489	6.6684	6.74164	6.83436	6.42809	6.63122				6.80212	6.82595	6.81404	6.88826	6.92248	6.90528	6.92187	6.96646	6.9439					03_Water-MeNH2_1.00_dimer.out	03_Water-MeNH2_1.00.xyz	-172.105	-171.334	-172.057	-171.323
6.69539	03_Water-MeNH2_1.05_dimer.out	0.115477	0.238987	0.177232	0.085223	0.42944	0.257331	0.135312	0.114119	0.124716	0.06733	0.0408851	0.0541464	0.0409253	0.0071413	0.0241801					6.57992	6.45641	6.51816	6.61017	6.26595	6.43806				6.56008	6.58127	6.57068	6.62806	6.65451	6.64125	6.65447	6.68825	6.67121					03_Water-MeNH2_1.05_dimer.out	03_Water-MeNH2_1.05.xyz	-172.105	-171.334	-172.056	-171.323
6.31753	03_Water-MeNH2_1.10_dimer.out	0.102063	0.206508	0.154286	0.0754451	0.369033	0.222239	0.119515	0.0999506	0.109733	0.0547745	0.0313906	0.0431065	0.029911	0.000823372	0.0154673					6.21546	6.11102	6.16324	6.24208	5.94849	6.09529				6.19801	6.21758	6.20779	6.26275	6.28614	6.27442	6.28762	6.3167	6.30206					03_Water-MeNH2_1.10_dimer.out	03_Water-MeNH2_1.10.xyz	-172.104	-171.334	-172.056	-171.323
4.92823	03_Water-MeNH2_1.25_dimer.out	0.0811828	0.145361	0.113272	0.0471594	0.232536	0.139848	0.10349	0.0882066	0.0958481	0.0509892	0.0313783	0.0412167	0.0325637	0.00772477	0.0202561					4.84704	4.78286	4.81495	4.88107	4.69569	4.78838				4.82474	4.84002	4.83238	4.87724	4.89685	4.88701	4.89566	4.9205	4.90797					03_Water-MeNH2_1.25_dimer.out	03_Water-MeNH2_1.25.xyz	-172.102	-171.333	-172.054	-171.322
2.97972	03_Water-MeNH2_1.50_dimer.out	0.0846289	0.116496	0.100563	0.0467364	0.141253	0.0939948	0.109472	0.100265	0.104869	0.047099	0.0320768	0.0396344	0.0373249	0.0188808	0.0282088					2.89509	2.86322	2.87915	2.93298	2.83846	2.88572				2.87024	2.87945	2.87485	2.93262	2.94764	2.94008	2.94239	2.96084	2.95151					03_Water-MeNH2_1.50_dimer.out	03_Water-MeNH2_1.50.xyz	-172.099	-171.331	-172.051	-171.319
1.14169	03_Water-MeNH2_2.00_dimer.out	0.0257601	0.0342558	0.0300079	0.00428757	0.0314358	0.0178617	0.0398382	0.0361046	0.0379714	0.0217189	0.018756	0.020224	0.0170704	0.0135349	0.0152858					1.11593	1.10743	1.11168	1.1374	1.11025	1.12383				1.10185	1.10558	1.10372	1.11997	1.12293	1.12146	1.12462	1.12815	1.1264					03_Water-MeNH2_2.00_dimer.out	03_Water-MeNH2_2.00.xyz	-172.096	-171.328	-172.048	-171.317
7.73932	04_Water-Peptide_0.90_dimer.out	0.212408	0.478149	0.345278	0.183286	0.876811	0.530049	0.231501	0.216773	0.224137	0.108761	0.0775698	0.0933119	0.0343806	0.00852757	0.0132634					7.52692	7.26117	7.39404	7.55604	6.86251	7.20927				7.50782	7.52255	7.51519	7.63056	7.66175	7.64601	7.70494	7.74785	7.72606					04_Water-Peptide_0.90_dimer.out	04_Water-Peptide_0.90.xyz	-324.58	-323.191	-324.492	-323.17
8.13066	04_Water-Peptide_0.95_dimer.out	0.246768	0.478974	0.362871	0.218769	0.816128	0.517449	0.265125	0.257923	0.261524	0.101381	0.0813087	0.0914407	0.0311499	0.00148513	0.0165401					7.88389	7.65169	7.76779	7.91189	7.31453	7.61321				7.86554	7.87274	7.86914	8.02928	8.04935	8.03922	8.09951	8.12918	8.11412					04_Water-Peptide_0.95_dimer.out	04_Water-Peptide_0.95.xyz	-324.581	-323.192	-324.493	-323.171
8.12775	04_Water-Peptide_1.00_dimer.out	0.219216	0.418335	0.318775	0.189816	0.705969	0.447893	0.238491	0.229753	0.234122	0.0923273	0.0727835	0.0826334	0.0326082	0.00327868	0.0181526					7.90853	7.70941	7.80897	7.93793	7.42178	7.67986				7.88926	7.898	7.89363	8.03542	8.05496	8.04511	8.09514	8.12447	8.1096					04_Water-Peptide_1.00_dimer.out	04_Water-Peptide_1.00.xyz	-324.581	-323.193	-324.493	-323.172
7.87768	04_Water-Peptide_1.05_dimer.out	0.193126	0.364304	0.278715	0.153888	0.601261	0.377574	0.218851	0.208947	0.213899	0.0898062	0.0713792	0.0806504	0.02323	0.00531545	0.00914112					7.68456	7.51338	7.59897	7.72379	7.27642	7.50011				7.65883	7.66873	7.66378	7.78788	7.8063	7.79703	7.85445	7.883	7.86854					04_Water-Peptide_1.05_dimer.out	04_Water-Peptide_1.05.xyz	-324.58	-323.193	-324.492	-323.172
7.48215	04_Water-Peptide_1.10_dimer.out	0.167809	0.317852	0.242831	0.122525	0.511013	0.316769	0.197499	0.191209	0.194354	0.088888	0.0766615	0.0828098	0.0337458	0.0126317	0.0233301					7.31434	7.1643	7.23932	7.35963	6.97114	7.16538				7.28465	7.29094	7.2878	7.39326	7.40549	7.39934	7.44841	7.46952	7.45882					04_Water-Peptide_1.10_dimer.out	04_Water-Peptide_1.10.xyz	-324.58	-323.193	-324.492	-323.172
5.99425	04_Water-Peptide_1.25_dimer.out	0.142186	0.242766	0.192476	0.0883773	0.34939	0.218883	0.177465	0.172859	0.175162	0.076159	0.0679489	0.0720654	0.0421202	0.0264876	0.0344009					5.85206	5.75148	5.80177	5.90587	5.64486	5.77536				5.81678	5.82139	5.81908	5.91809	5.9263	5.92218	5.95213	5.96776	5.95985					04_Water-Peptide_1.25_dimer.out	04_Water-Peptide_1.25.xyz	-324.577	-323.191	-324.49	-323.17
3.83009	04_Water-Peptide_1.50_dimer.out	0.119881	0.175824	0.147853	0.0801757	0.210788	0.145482	0.145914	0.1529	0.149407	0.0554517	0.0592758	0.0573733	0.040182	0.0388663	0.0395949					3.71021	3.65427	3.68224	3.74992	3.61931	3.68461				3.68418	3.67719	3.68069	3.77464	3.77082	3.77272	3.78991	3.79123	3.7905					04_Water-Peptide_1.50_dimer.out	04_Water-Peptide_1.50.xyz	-324.574	-323.189	-324.486	-323.168
1.43887	04_Water-Peptide_2.00_dimer.out	0.0321205	0.0467876	0.0394541	0.00771504	0.0454364	0.0265757	0.0481216	0.0476735	0.0478976	0.0301472	0.0303756	0.030249	0.0263161	0.025392	0.0258487					1.40674	1.39208	1.39941	1.43115	1.39343	1.41229				1.39074	1.39119	1.39097	1.40872	1.40849	1.40862	1.41255	1.41347	1.41302					04_Water-Peptide_2.00_dimer.out	04_Water-Peptide_2.00.xyz	-324.57	-323.185	-324.482	-323.164
5.38667	05_MeOH-MeOH_0.90_dimer.out	0.192448	0.439537	0.315992	0.173877	0.788066	0.480971	0.204624	0.211029	0.207826	0.0399168	0.0396029	0.0397879	0.0157714	0.0326511	0.0239673					5.19422	4.94713	5.07068	5.21279	4.5986	4.9057				5.18204	5.17564	5.17884	5.34675	5.34707	5.34688	5.40244	5.41932	5.41064					05_MeOH-MeOH_0.90_dimer.out	05_MeOH-MeOH_0.90.xyz	-231.194	-230.203	-231.13	-230.187
5.77098	05_MeOH-MeOH_0.95_dimer.out	0.186004	0.39406	0.290032	0.140603	0.666338	0.403471	0.21577	0.215546	0.215658	0.0762094	0.0725429	0.0743753	0.0301553	0.0130256	0.0217523					5.58497	5.37692	5.48095	5.63037	5.10464	5.36751				5.55521	5.55543	5.55532	5.69477	5.69843	5.6966	5.74082	5.75795	5.74923					05_MeOH-MeOH_0.95_dimer.out	05_MeOH-MeOH_0.95.xyz	-231.194	-230.204	-231.131	-230.189
5.8036	05_MeOH-MeOH_1.00_dimer.out	0.161247	0.3401	0.250673	0.112777	0.563845	0.338311	0.193025	0.193405	0.193215	0.0729913	0.0685575	0.070794	0.0327737	0.0158392	0.0244901					5.64236	5.4635	5.55293	5.69083	5.23976	5.46529				5.61058	5.6102	5.61039	5.73061	5.73505	5.73281	5.77083	5.78776	5.77911					05_MeOH-MeOH_1.00_dimer.out	05_MeOH-MeOH_1.00.xyz	-231.194	-230.205	-231.131	-230.189
5.62	05_MeOH-MeOH_1.05_dimer.out	0.133761	0.290373	0.212067	0.0893617	0.478883	0.284122	0.162871	0.16678	0.164826	0.0583546	0.0588472	0.0586094	0.0223309	0.0124365	0.0175224					5.48624	5.32963	5.40794	5.53064	5.14112	5.33588				5.45713	5.45322	5.45518	5.56165	5.56116	5.56139	5.59767	5.60757	5.60248					05_MeOH-MeOH_1.05_dimer.out	05_MeOH-MeOH_1.05.xyz	-231.194	-230.205	-231.13	-230.19
5.31207	05_MeOH-MeOH_1.10_dimer.out	0.120056	0.254219	0.187138	0.0673633	0.401153	0.234258	0.154604	0.157885	0.156244	0.0630923	0.0652845	0.064175	0.0301817	0.0233115	0.026836					5.19202	5.05785	5.12494	5.24471	4.91092	5.07782				5.15747	5.15419	5.15583	5.24898	5.24679	5.2479	5.28189	5.28876	5.28524					05_MeOH-MeOH_1.10_dimer.out	05_MeOH-MeOH_1.10.xyz	-231.194	-230.205	-231.13	-230.19
4.15067	05_MeOH-MeOH_1.25_dimer.out	0.089552	0.173503	0.131528	0.0565043	0.266584	0.161544	0.111219	0.112476	0.111848	0.0213973	0.0203676	0.0208827	0.00299366	0.0051415	0.000987061					4.06112	3.97717	4.01915	4.09417	3.88409	3.98913				4.03946	4.0382	4.03883	4.12928	4.13031	4.12979	4.14768	4.15582	4.15166					05_MeOH-MeOH_1.25_dimer.out	05_MeOH-MeOH_1.25.xyz	-231.192	-230.204	-231.128	-230.189
2.5284	05_MeOH-MeOH_1.50_dimer.out	0.0636457	0.111647	0.0876464	0.0374621	0.137141	0.0873016	0.0808126	0.0949323	0.0878724	0.0100852	0.0208894	0.0155041	0.00188158	0.00811918	0.00508038					2.46475	2.41675	2.44075	2.49093	2.39125	2.44109				2.44758	2.43346	2.44052	2.51831	2.50751	2.51289	2.52651	2.52028	2.52331					05_MeOH-MeOH_1.50_dimer.out	05_MeOH-MeOH_1.50.xyz	-231.189	-230.202	-231.126	-230.187
1.01101	05_MeOH-MeOH_2.00_dimer.out	0.0104988	0.0302799	0.0203894	0.00365997	0.0329597	0.0183098	0.0149826	0.028523	0.0217528	0.00224643	0.0119579	0.00484366	0.00726484	0.00630085	0.000495713					1.00051	0.980729	0.99062	1.00735	0.978049	0.992699				0.996026	0.982486	0.989256	1.01326	0.999051	1.00617	1.01827	1.00471	1.0115					05_MeOH-MeOH_2.00_dimer.out	05_MeOH-MeOH_2.00.xyz	-231.187	-230.2	-231.123	-230.185
7.08127	06_MeOH-MeNH2_0.90_dimer.out	0.169473	0.410752	0.290112	0.124424	0.801032	0.462728	0.199009	0.154871	0.17694	0.0953471	0.0439902	0.0697191	0.0271135	0.0378123	0.0051167					6.9118	6.67052	6.79116	6.95685	6.28024	6.61854				6.88226	6.9264	6.90433	6.98592	7.03728	7.01155	7.05416	7.11908	7.08639					06_MeOH-MeNH2_0.90_dimer.out	06_MeOH-MeNH2_0.90.xyz	-211.334	-210.365	-211.276	-210.351
7.55441	06_MeOH-MeNH2_0.95_dimer.out	0.153736	0.355078	0.254407	0.0969288	0.680235	0.388582	0.190981	0.141894	0.166437	0.096532	0.0414982	0.0690542	0.0368829	0.0301882	0.00354542					7.40068	7.19933	7.3	7.45748	6.87418	7.16583				7.36343	7.41252	7.38797	7.45788	7.51291	7.48536	7.51753	7.5846	7.55087					06_MeOH-MeNH2_0.95_dimer.out	06_MeOH-MeNH2_0.95.xyz	-211.335	-210.366	-211.277	-210.353
7.60087	06_MeOH-MeNH2_1.00_dimer.out	0.146258	0.316325	0.231291	0.0833873	0.586505	0.334946	0.187478	0.139185	0.163332	0.10218	0.0487365	0.0754909	0.0482084	0.015325	0.0166044					7.45461	7.28454	7.36957	7.51748	7.01436	7.26592				7.41339	7.46168	7.43753	7.49869	7.55213	7.52537	7.55266	7.61619	7.58426					06_MeOH-MeNH2_1.00_dimer.out	06_MeOH-MeNH2_1.00.xyz	-211.335	-210.367	-211.277	-210.354
7.37783	06_MeOH-MeNH2_1.05_dimer.out	0.148706	0.293166	0.220936	0.084975	0.515223	0.300099	0.190491	0.147578	0.169034	0.106717	0.0599856	0.0833699	0.065729	0.010603	0.0382885					7.22912	7.08466	7.15689	7.29285	6.8626	7.07773				7.18734	7.23025	7.20879	7.27111	7.31784	7.29446	7.3121	7.36722	7.33954					06_MeOH-MeNH2_1.05_dimer.out	06_MeOH-MeNH2_1.05.xyz	-211.335	-210.368	-211.277	-210.354
6.99427	06_MeOH-MeNH2_1.10_dimer.out	0.14929	0.270549	0.209919	0.0913367	0.458081	0.274709	0.187286	0.147597	0.167441	0.0989679	0.0550223	0.0770174	0.0631631	0.0115174	0.037459					6.84499	6.72373	6.78436	6.90294	6.53619	6.71957				6.80699	6.84668	6.82683	6.89531	6.93925	6.91726	6.93111	6.98276	6.95682					06_MeOH-MeNH2_1.10_dimer.out	06_MeOH-MeNH2_1.10.xyz	-211.334	-210.368	-211.276	-210.354
5.50482	06_MeOH-MeNH2_1.25_dimer.out	0.106143	0.184385	0.145264	0.0736175	0.300968	0.187293	0.127468	0.107949	0.117708	0.0557764	0.0327775	0.0442953	0.0320657	0.00389477	0.0180628					5.39868	5.32044	5.35956	5.43121	5.20385	5.31753				5.37736	5.39687	5.38711	5.44905	5.47205	5.46053	5.47276	5.50093	5.48676					06_MeOH-MeNH2_1.25_dimer.out	06_MeOH-MeNH2_1.25.xyz	-211.332	-210.367	-211.274	-210.353
3.34489	06_MeOH-MeNH2_1.50_dimer.out	0.108463	0.148907	0.128685	0.0699645	0.187316	0.12864	0.133704	0.123726	0.128715	0.0375254	0.0204191	0.0290238	0.0260384	0.00397394	0.0151369					3.23643	3.19598	3.2162	3.27492	3.15757	3.21625				3.21118	3.22116	3.21617	3.30736	3.32447	3.31586	3.31885	3.34091	3.32975					06_MeOH-MeNH2_1.50_dimer.out	06_MeOH-MeNH2_1.50.xyz	-211.328	-210.365	-211.27	-210.351
1.27327	06_MeOH-MeNH2_2.00_dimer.out	0.0289153	0.0412781	0.0350967	0.00729386	0.047378	0.0273359	0.043091	0.0372787	0.0401849	0.0134841	0.00679312	0.0101401	0.00513619	0.00299055	0.00108747					1.24435	1.23199	1.23817	1.26597	1.22589	1.24593				1.23018	1.23599	1.23308	1.25978	1.26647	1.26313	1.26813	1.27626	1.27218					06_MeOH-MeNH2_2.00_dimer.out	06_MeOH-MeNH2_2.00.xyz	-211.325	-210.362	-211.267	-210.348
7.75614	07_MeOH-Peptide_0.90_dimer.out	0.311403	0.600091	0.455747	0.287021	1.02861	0.657816	0.327389	0.319139	0.323264	0.111559	0.107535	0.109441	0.0141166	0.0055639	0.00427344					7.44474	7.15605	7.30039	7.46912	6.72753	7.09833				7.42875	7.437	7.43288	7.64458	7.64861	7.6467	7.74203	7.76171	7.75187					07_MeOH-Peptide_0.90_dimer.out	07_MeOH-Peptide_0.90.xyz	-363.809	-362.223	-363.711	-362.2
8.23517	07_MeOH-Peptide_0.95_dimer.out	0.311068	0.560382	0.435725	0.311488	0.952837	0.632162	0.310794	0.303075	0.306934	0.0703832	0.0638582	0.0670411	0.0181044	0.0405471	0.0292848					7.9241	7.67479	7.79945	7.92368	7.28233	7.60301				7.92438	7.9321	7.92824	8.16479	8.17131	8.16813	8.25328	8.27572	8.26446					07_MeOH-Peptide_0.95_dimer.out	07_MeOH-Peptide_0.95.xyz	-363.81	-362.225	-363.712	-362.202
8.28898	07_MeOH-Peptide_1.00_dimer.out	0.29584	0.512657	0.404249	0.279882	0.829534	0.554708	0.306303	0.304902	0.305603	0.0856287	0.0887838	0.0870952	0.00649785	0.00463155	0.000910835					7.99314	7.77632	7.88473	8.00909	7.45944	7.73427				7.98267	7.98407	7.98337	8.20335	8.20019	8.20188	8.28248	8.29361	8.28807					07_MeOH-Peptide_1.00_dimer.out	07_MeOH-Peptide_1.00.xyz	-363.81	-362.226	-363.712	-362.203
8.07188	07_MeOH-Peptide_1.05_dimer.out	0.281495	0.471351	0.376423	0.263405	0.732405	0.497905	0.293355	0.300195	0.296775	0.0776462	0.0968375	0.0870467	0.00247435	0.0108844	0.00648002					7.79039	7.60053	7.69546	7.80848	7.33948	7.57398				7.77853	7.77169	7.77511	7.99424	7.97505	7.98484	8.06941	8.061	8.0654					07_MeOH-Peptide_1.05_dimer.out	07_MeOH-Peptide_1.05.xyz	-363.81	-362.226	-363.712	-362.203
7.69153	07_MeOH-Peptide_1.10_dimer.out	0.25087	0.418529	0.334699	0.225838	0.63356	0.429699	0.267281	0.277547	0.272414	0.0790487	0.0988865	0.0888105	0.0131851	0.0226626	0.0177846					7.44066	7.273	7.35683	7.46569	7.05797	7.26183				7.42424	7.41398	7.41911	7.61248	7.59264	7.60271	7.67834	7.66886	7.67374					07_MeOH-Peptide_1.10_dimer.out	07_MeOH-Peptide_1.10.xyz	-363.809	-362.226	-363.711	-362.203
6.18753	07_MeOH-Peptide_1.25_dimer.out	0.180539	0.289986	0.235263	0.152103	0.418655	0.285379	0.199182	0.205627	0.202404	0.0548689	0.0753049	0.0648935	0.017735	0.0305152	0.0239143					6.00699	5.89754	5.95227	6.03543	5.76888	5.90215				5.98835	5.9819	5.98513	6.13266	6.11223	6.12264	6.1698	6.15702	6.16362					07_MeOH-Peptide_1.25_dimer.out	07_MeOH-Peptide_1.25.xyz	-363.807	-362.225	-363.709	-362.202
3.64659	07_MeOH-Peptide_1.50_dimer.out	0.145674	0.205969	0.175822	0.120826	0.255279	0.188052	0.161966	0.17364	0.167803	0.0335844	0.047494	0.0404792	0.0152525	0.0235367	0.0193615					3.50092	3.44063	3.47077	3.52577	3.39132	3.45854				3.48463	3.47295	3.47879	3.61301	3.5991	3.60612	3.63134	3.62306	3.62723					07_MeOH-Peptide_1.50_dimer.out	07_MeOH-Peptide_1.50.xyz	-363.803	-362.222	-363.705	-362.199
1.09751	07_MeOH-Peptide_2.00_dimer.out	0.0229924	0.0385964	0.0307944	0.0179319	0.0443746	0.0311533	0.0263102	0.034808	0.0305591	0.00558679	0.0160425	0.0107874	0.000289847	0.00932052	0.00478101					1.07452	1.05891	1.06671	1.07958	1.05313	1.06636				1.0712	1.0627	1.06695	1.09192	1.08147	1.08672	1.09722	1.08819	1.09273					07_MeOH-Peptide_2.00_dimer.out	07_MeOH-Peptide_2.00.xyz	-363.799	-362.219	-363.701	-362.196
4.67513	08_MeOH-Water_0.90_dimer.out	0.155936	0.35728	0.256608	0.120615	0.619807	0.370211	0.179093	0.185158	0.182126	0.064811	0.0600701	0.0625274	0.0287377	0.0109412	0.0201347					4.5192	4.31785	4.41853	4.55452	4.05533	4.30492				4.49604	4.48998	4.49301	4.61032	4.61506	4.61261	4.6464	4.66419	4.655					08_MeOH-Water_0.90_dimer.out	08_MeOH-Water_0.90.xyz	-191.963	-191.169	-191.91	-191.156
5.01703	08_MeOH-Water_0.95_dimer.out	0.133621	0.304466	0.219043	0.0976279	0.526688	0.312158	0.157219	0.158769	0.157994	0.0593538	0.0507908	0.0551561	0.0325899	0.0129306	0.023028					4.88341	4.71256	4.79799	4.9194	4.49034	4.70487				4.85981	4.85826	4.85903	4.95767	4.96624	4.96187	4.98444	5.0041	4.994					08_MeOH-Water_0.95_dimer.out	08_MeOH-Water_0.95.xyz	-191.964	-191.17	-191.91	-191.157
5.04458	08_MeOH-Water_1.00_dimer.out	0.113007	0.259443	0.186225	0.0700429	0.438531	0.254287	0.141175	0.142027	0.141601	0.0593338	0.0509284	0.05521	0.0304476	0.0117437	0.021345					4.93157	4.78514	4.85836	4.97454	4.60605	4.79029				4.90341	4.90255	4.90298	4.98525	4.99365	4.98937	5.01413	5.03284	5.02324					08_MeOH-Water_1.00_dimer.out	08_MeOH-Water_1.00.xyz	-191.964	-191.171	-191.91	-191.158
4.88113	08_MeOH-Water_1.05_dimer.out	0.097707	0.222495	0.160101	0.046578	0.363945	0.205262	0.131229	0.129756	0.130492	0.0595914	0.0497456	0.0547405	0.0346096	0.0158524	0.0254522					4.78342	4.65864	4.72103	4.83455	4.51719	4.67587				4.7499	4.75138	4.75064	4.82154	4.83139	4.82639	4.84652	4.86528	4.85568					08_MeOH-Water_1.05_dimer.out	08_MeOH-Water_1.05.xyz	-191.964	-191.171	-191.91	-191.158
4.60958	08_MeOH-Water_1.10_dimer.out	0.0840539	0.190852	0.137453	0.0254737	0.300821	0.163147	0.122461	0.118752	0.120607	0.0614736	0.0499794	0.055795	0.0397048	0.0207337	0.0304161					4.52552	4.41873	4.47212	4.5841	4.30876	4.44643				4.48712	4.49082	4.48897	4.5481	4.5596	4.55378	4.56987	4.58884	4.57916					08_MeOH-Water_1.10_dimer.out	08_MeOH-Water_1.10.xyz	-191.963	-191.171	-191.91	-191.158
3.59767	08_MeOH-Water_1.25_dimer.out	0.11798	0.185271	0.151625	0.053295	0.235115	0.144205	0.16039	0.152591	0.15649	0.0672415	0.0497792	0.0585905	0.0555907	0.0318207	0.0439008					3.47969	3.4124	3.44604	3.54437	3.36255	3.45346				3.43728	3.44508	3.44118	3.53043	3.54789	3.53908	3.54208	3.56585	3.55377					08_MeOH-Water_1.25_dimer.out	08_MeOH-Water_1.25.xyz	-191.962	-191.17	-191.908	-191.157
2.20477	08_MeOH-Water_1.50_dimer.out	0.0423089	0.0770407	0.0596748	0.00684721	0.0946587	0.0439058	0.0745374	0.0654898	0.0700136	0.0323207	0.018723	0.02556	0.02794	0.0117702	0.0199422					2.16246	2.12773	2.14509	2.21161	2.11011	2.16086				2.13023	2.13928	2.13475	2.17245	2.18604	2.17921	2.17683	2.193	2.18482					08_MeOH-Water_1.50_dimer.out	08_MeOH-Water_1.50.xyz	-191.96	-191.168	-191.906	-191.155
0.909327	08_MeOH-Water_2.00_dimer.out	0.00896075	0.0223697	0.0156652	0.0248662	0.0213221	0.00177206	0.0311389	0.0230566	0.0270977	0.0240616	0.0134313	0.0187724	0.0219481	0.0105362	0.0162904					0.900366	0.886957	0.893661	0.934193	0.888005	0.911099				0.878188	0.88627	0.882229	0.885265	0.895895	0.890554	0.887379	0.89879	0.893036					08_MeOH-Water_2.00_dimer.out	08_MeOH-Water_2.00.xyz	-191.958	-191.167	-191.904	-191.154
2.83742	09_MeNH2-MeOH_0.90_dimer.out	0.0943061	0.250962	0.172634	0.0204975	0.458681	0.239589	0.142698	0.114775	0.128736	0.0862322	0.0614415	0.0737869	0.0439446	0.010967	0.0274783					2.74311	2.58646	2.66478	2.81692	2.37874	2.59783				2.69472	2.72264	2.70868	2.75119	2.77598	2.76363	2.79347	2.82645	2.80994					09_MeNH2-MeOH_0.90_dimer.out	09_MeNH2-MeOH_0.90.xyz	-211.328	-210.361	-211.27	-210.347
3.05113	09_MeNH2-MeOH_0.95_dimer.out	0.0797049	0.214486	0.147095	0.00798699	0.375618	0.191802	0.126726	0.108843	0.117784	0.0736851	0.0597105	0.0666402	0.0377805	0.0157712	0.0267892					2.97142	2.83664	2.90403	3.04314	2.67551	2.85932				2.9244	2.94228	2.93334	2.97744	2.99141	2.98449	3.01334	3.03535	3.02434					09_MeNH2-MeOH_0.95_dimer.out	09_MeNH2-MeOH_0.95.xyz	-211.328	-210.362	-211.27	-210.348
3.03663	09_MeNH2-MeOH_1.00_dimer.out	0.0787223	0.193464	0.136093	0.00712011	0.317161	0.162141	0.125667	0.112363	0.119015	0.070277	0.0592941	0.0647447	0.0396761	0.0216682	0.0306966					2.9579	2.84316	2.90053	3.02951	2.71947	2.87449				2.91096	2.92426	2.91761	2.96635	2.97733	2.97188	2.99695	3.01496	3.00593					09_MeNH2-MeOH_1.00_dimer.out	09_MeNH2-MeOH_1.00.xyz	-211.328	-210.363	-211.27	-210.349
2.89242	09_MeNH2-MeOH_1.05_dimer.out	0.0660048	0.163976	0.11499	0.000872487	0.260246	0.130559	0.108708	0.100858	0.104783	0.061342	0.0542008	0.0577505	0.0375834	0.0234045	0.0305536					2.82642	2.72845	2.77743	2.89155	2.63217	2.76186				2.78371	2.79156	2.78764	2.83108	2.83822	2.83467	2.85484	2.86902	2.86187					09_MeNH2-MeOH_1.05_dimer.out	09_MeNH2-MeOH_1.05.xyz	-211.328	-210.363	-211.27	-210.349
2.6818	09_MeNH2-MeOH_1.10_dimer.out	0.0715695	0.154888	0.113229	0.0130247	0.230121	0.121573	0.109954	0.105562	0.107758	0.0549201	0.0490366	0.0519795	0.0363565	0.0247941	0.030647					2.61023	2.52691	2.56857	2.66877	2.45167	2.56022				2.57184	2.57623	2.57404	2.62688	2.63276	2.62982	2.64544	2.657	2.65115					09_MeNH2-MeOH_1.10_dimer.out	09_MeNH2-MeOH_1.10.xyz	-211.328	-210.363	-211.27	-210.349
1.97082	09_MeNH2-MeOH_1.25_dimer.out	0.0689382	0.125732	0.0973351	0.0362036	0.159382	0.0977927	0.0904002	0.10367	0.097035	0.013787	0.0239561	0.0188843	0.00435413	0.0106164	0.00754691					1.90189	1.84509	1.87349	1.93462	1.81144	1.87303				1.88042	1.86715	1.87379	1.95704	1.94687	1.95194	1.96647	1.96021	1.96328					09_MeNH2-MeOH_1.25_dimer.out	09_MeNH2-MeOH_1.25.xyz	-211.327	-210.363	-211.268	-210.349
1.09813	09_MeNH2-MeOH_1.50_dimer.out	0.0372256	0.0670718	0.0521487	0.019307	0.0809231	0.050115	0.0489737	0.0579905	0.0534821	0.00106974	0.00731236	0.00420821	0.00555718	0.00183119	0.00364141					1.0609	1.03105	1.04598	1.07882	1.0172	1.04801				1.04915	1.04014	1.04464	1.09706	1.09081	1.09392	1.10368	1.09996	1.10177					09_MeNH2-MeOH_1.50_dimer.out	09_MeNH2-MeOH_1.50.xyz	-211.325	-210.362	-211.267	-210.348
0.393125	09_MeNH2-MeOH_2.00_dimer.out	0.000938635	0.0139919	0.00746525	0.016607	0.00439015	0.00610842	0.0124422	0.0202871	0.0163646	0.0125841	0.0205785	0.0165797	0.00940557	0.017093	0.01325					0.392187	0.379134	0.38566	0.409732	0.388735	0.399234				0.380683	0.372838	0.376761	0.380541	0.372547	0.376546	0.38372	0.376032	0.379875					09_MeNH2-MeOH_2.00_dimer.out	09_MeNH2-MeOH_2.00.xyz	-211.324	-210.361	-211.266	-210.348
3.72176	10_MeNH2-MeNH2_0.90_dimer.out	0.049374	0.218256	0.133815	0.045398	0.51314	0.279269	0.0519808	0.0249205	0.0384507	0.0384858	0.0156252	0.0270057	0.0193195	0.0486875	0.0340089					3.67238	3.5035	3.58794	3.67636	3.20862	3.44249				3.66977	3.69684	3.68331	3.68327	3.70613	3.69475	3.74108	3.77044	3.75576					10_MeNH2-MeNH2_0.90_dimer.out	10_MeNH2-MeNH2_0.90.xyz	-191.468	-190.521	-191.415	-190.509
4.10425	10_MeNH2-MeNH2_0.95_dimer.out	0.0598559	0.203426	0.131641	0.0380777	0.429682	0.23388	0.0741344	0.0550847	0.0646095	0.0605559	0.0441196	0.0523053	0.0100848	0.0115596	0.000733855					4.04439	3.90082	3.97261	4.06617	3.67457	3.87037				4.03012	4.04917	4.03964	4.04369	4.06013	4.05194	4.09417	4.11581	4.10498					10_MeNH2-MeNH2_0.95_dimer.out	10_MeNH2-MeNH2_0.95.xyz	-191.468	-190.523	-191.415	-190.511
4.1526	10_MeNH2-MeNH2_1.00_dimer.out	0.054832	0.176899	0.115865	0.036081	0.360827	0.198454	0.0671258	0.0563089	0.0617174	0.0492954	0.0411327	0.04518	0.00338158	0.0101701	0.00338826					4.09777	3.97571	4.03674	4.11652	3.79178	3.95415				4.08548	4.0963	4.09089	4.10331	4.11147	4.10742	4.14922	4.16277	4.15599					10_MeNH2-MeNH2_1.00_dimer.out	10_MeNH2-MeNH2_1.00.xyz	-191.468	-190.524	-191.415	-190.512
4.00192	10_MeNH2-MeNH2_1.05_dimer.out	0.0336081	0.137872	0.0857398	0.0175438	0.289766	0.153655	0.0441403	0.0382842	0.0412123	0.037771	0.0324126	0.0350846	0.00187651	0.0131256	0.00744152					3.96831	3.86404	3.91618	3.98437	3.71215	3.84826				3.95778	3.96363	3.9607	3.96414	3.9695	3.96683	4.00379	4.01504	4.00936					10_MeNH2-MeNH2_1.05_dimer.out	10_MeNH2-MeNH2_1.05.xyz	-191.468	-190.525	-191.415	-190.513
3.74167	10_MeNH2-MeNH2_1.10_dimer.out	0.0358564	0.123832	0.0798441	0.0179091	0.248681	0.133295	0.0476233	0.0419763	0.0447998	0.0361584	0.0286531	0.032423	0.00376748	0.00953037	0.00278419					3.70582	3.61784	3.66183	3.72376	3.49299	3.60838				3.69405	3.6997	3.69687	3.70551	3.71302	3.70925	3.73791	3.7512	3.74446					10_MeNH2-MeNH2_1.10_dimer.out	10_MeNH2-MeNH2_1.10.xyz	-191.468	-190.525	-191.415	-190.513
2.78069	10_MeNH2-MeNH2_1.25_dimer.out	0.0532667	0.108679	0.0809726	0.0492548	0.191568	0.120412	0.0558971	0.0543332	0.0551151	0.0030776	0.00567955	0.00438352	0.0215086	0.0290441	0.0252263					2.72742	2.67201	2.69971	2.73143	2.58912	2.66027				2.72479	2.72635	2.72557	2.78376	2.78637	2.78507	2.80219	2.80973	2.80591					10_MeNH2-MeNH2_1.25_dimer.out	10_MeNH2-MeNH2_1.25.xyz	-191.466	-190.525	-191.413	-190.513
1.30176	10_MeNH2-MeNH2_1.50_dimer.out	0.0497122	0.0673271	0.0585196	0.0267948	0.0857165	0.0562556	0.0647377	0.0552703	0.060004	0.0110539	0.000920133	0.00597945	0.00433804	0.00870057	0.00215976					1.25204	1.23443	1.24324	1.27496	1.21604	1.2455				1.23702	1.24649	1.24175	1.2907	1.30084	1.29578	1.29742	1.31046	1.30392					10_MeNH2-MeNH2_1.50_dimer.out	10_MeNH2-MeNH2_1.50.xyz	-191.464	-190.524	-191.411	-190.512
0.385362	10_MeNH2-MeNH2_2.00_dimer.out	0.385362	0.385362	0.385362	0.385362	0.385362	0.385362	0.385362	0.385362	0.385362	0.0280233	0.0255864	0.0267327	0.0126471	0.00173881	0.00714604																	0.357339	0.359776	0.358629	0.372715	0.383623	0.378216					10_MeNH2-MeNH2_2.00_dimer.out	10_MeNH2-MeNH2_2.00.xyz	-191.462	190.523	-191.409	-190.511
4.95826	11_MeNH2-Peptide_0.90_dimer.out	0.0438757	0.287854	0.165865	0.030541	0.617869	0.293664	0.0926659	0.0714843	0.0820751	0.0898044	0.0899304	0.089633	0.00119081	0.00513404	0.00349682					4.91439	4.67041	4.7924	4.9888	4.34039	4.6646				4.8656	4.88678	4.87619	4.86846	4.86833	4.86863	4.95945	4.9634	4.96176					11_MeNH2-Peptide_0.90_dimer.out	11_MeNH2-Peptide_0.90.xyz	-343.944	-342.379	-343.851	-342.358
5.35424	11_MeNH2-Peptide_0.95_dimer.out	0.0417744	0.25109	0.146432	0.0353108	0.521453	0.243071	0.0923141	0.0738311	0.0830726	0.0717848	0.0712856	0.0713323	0.00859672	0.0138338	0.0114894					5.31246	5.10315	5.2078	5.38955	4.83278	5.11116				5.26192	5.2804	5.27116	5.28245	5.28295	5.2829	5.36283	5.36807	5.36572					11_MeNH2-Peptide_0.95_dimer.out	11_MeNH2-Peptide_0.95.xyz	-343.944	-342.381	-343.852	-342.36
5.39666	11_MeNH2-Peptide_1.00_dimer.out	0.0333978	0.210707	0.122052	0.016163	0.460279	0.222058	0.0658915	0.0470786	0.0564851	0.0191367	0.0192094	0.018953	0.0513266	0.0556963	0.0538147					5.36327	5.18596	5.27461	5.41283	4.93638	5.17461				5.33077	5.34958	5.34018	5.37753	5.37745	5.37771	5.44799	5.45236	5.45048					11_MeNH2-Peptide_1.00_dimer.out	11_MeNH2-Peptide_1.00.xyz	-343.944	-342.382	-343.852	-342.361
5.22226	11_MeNH2-Peptide_1.05_dimer.out	0.0806135	0.236703	0.158658	0.00160846	0.40825	0.203321	0.134521	0.124232	0.129376	0.0745793	0.0787172	0.0764735	0.0137092	0.0122789	0.0127788					5.14165	4.98556	5.06361	5.22387	4.81401	5.01894				5.08774	5.09803	5.09289	5.14768	5.14355	5.14579	5.20855	5.20998	5.20949					11_MeNH2-Peptide_1.05_dimer.out	11_MeNH2-Peptide_1.05.xyz	-343.944	-342.383	-343.852	-342.361
4.92339	11_MeNH2-Peptide_1.10_dimer.out	0.117508	0.25197	0.184739	0.0339245	0.386492	0.210208	0.172308	0.163773	0.16804	0.0743911	0.0777778	0.0759266	0.0216907	0.0179133	0.0196351					4.80588	4.67142	4.73865	4.88946	4.5369	4.71318				4.75108	4.75962	4.75535	4.849	4.84561	4.84746	4.9017	4.90548	4.90375					11_MeNH2-Peptide_1.10_dimer.out	11_MeNH2-Peptide_1.10.xyz	-343.943	-342.383	-343.851	-342.362
3.19683	11_MeNH2-Peptide_1.25_dimer.out	0.0958713	0.162362	0.129116	0.0375501	0.219853	0.128702	0.134109	0.124668	0.129388	0.0443086	0.0463685	0.0451876	0.013534	0.0103053	0.0117472					3.10096	3.03447	3.06771	3.15928	2.97698	3.06813				3.06272	3.07216	3.06744	3.15252	3.15046	3.15164	3.1833	3.18652	3.18508					11_MeNH2-Peptide_1.25_dimer.out	11_MeNH2-Peptide_1.25.xyz	-343.941	-342.383	-343.848	-342.361
1.39662	11_MeNH2-Peptide_1.50_dimer.out	0.0475358	0.0694506	0.0584932	0.0157566	0.0847903	0.0502735	0.0683713	0.0593934	0.0638823	0.00821181	0.00619777	0.00711177	0.00259739	0.00639311	0.00462135					1.34908	1.32717	1.33812	1.38086	1.31183	1.34634				1.32825	1.33722	1.33273	1.3884	1.39042	1.3895	1.39921	1.40301	1.40124					11_MeNH2-Peptide_1.50_dimer.out	11_MeNH2-Peptide_1.50.xyz	-343.938	-342.381	-343.846	-342.36
0.454835	11_MeNH2-Peptide_2.00_dimer.out	0.00410143	0.0110988	0.00760011	0.0051182	0.0136732	0.00427748	0.0101461	0.00941093	0.00977853	0.00460922	0.00131899	0.00301233	0.00703613	0.00388764	0.00553485					0.450734	0.443736	0.447235	0.459953	0.441162	0.450558				0.444689	0.445424	0.445057	0.459444	0.456154	0.457847	0.461871	0.458723	0.46037					11_MeNH2-Peptide_2.00_dimer.out	11_MeNH2-Peptide_2.00.xyz	-343.936	-342.38	-343.844	-342.359
6.86088	12_MeNH2-Water_0.90_dimer.out	0.110324	0.342035	0.226179	0.084323	0.70612	0.395222	0.127371	0.103328	0.11535	0.0657356	0.0322011	0.0490554	0.0118759	0.0330137	0.0103015					6.75055	6.51884	6.6347	6.77655	6.15476	6.46565				6.73351	6.75755	6.74553	6.79514	6.82868	6.81182	6.849	6.89389	6.87118					12_MeNH2-Water_0.90_dimer.out	12_MeNH2-Water_0.90.xyz	-172.105	-171.332	-172.057	-171.32
7.29079	12_MeNH2-Water_0.95_dimer.out	0.0983132	0.295856	0.197085	0.0692641	0.601616	0.33544	0.117359	0.0953899	0.106374	0.0597373	0.0294738	0.0446806	0.00657741	0.0334152	0.0131942					7.19248	6.99494	7.09371	7.22153	6.68918	6.95535				7.17343	7.1954	7.18442	7.23106	7.26132	7.24611	7.28422	7.32421	7.30399					12_MeNH2-Water_0.95_dimer.out	12_MeNH2-Water_0.95.xyz	-172.106	-171.333	-172.057	-171.322
7.3118	12_MeNH2-Water_1.00_dimer.out	0.0990823	0.268616	0.183849	0.0788106	0.532201	0.305506	0.112373	0.0958002	0.104087	0.0456217	0.0221947	0.0339649	0.0015068	0.0300552	0.0140986					7.21271	7.04318	7.12795	7.23299	6.77959	7.00629				7.19942	7.216	7.20771	7.26617	7.2896	7.27783	7.31029	7.34185	7.32589					12_MeNH2-Water_1.00_dimer.out	12_MeNH2-Water_1.00.xyz	-172.106	-171.334	-172.057	-171.323
7.07662	12_MeNH2-Water_1.05_dimer.out	0.097144	0.241332	0.169238	0.0708745	0.455211	0.263043	0.114367	0.101105	0.107736	0.0522149	0.033231	0.0427685	0.0153272	0.0119006	0.00187951					6.97947	6.83528	6.90738	7.00574	6.6214	6.81357				6.96225	6.97551	6.96888	7.0244	7.04338	7.03385	7.06129	7.08852	7.07474					12_MeNH2-Water_1.05_dimer.out	12_MeNH2-Water_1.05.xyz	-172.105	-171.334	-172.057	-171.323
6.69088	12_MeNH2-Water_1.10_dimer.out	0.0878107	0.211533	0.149672	0.0577584	0.380878	0.219318	0.107514	0.100505	0.10401	0.05211	0.0410924	0.0466298	0.0188164	0.000866373	0.00912653					6.60307	6.47935	6.54121	6.63312	6.31001	6.47156				6.58337	6.59038	6.58687	6.63877	6.64979	6.64425	6.67207	6.69175	6.68176					12_MeNH2-Water_1.10_dimer.out	12_MeNH2-Water_1.10.xyz	-172.105	-171.334	-172.056	-171.323
5.23057	12_MeNH2-Water_1.25_dimer.out	0.054172	0.13635	0.0952608	0.0381984	0.236481	0.13734	0.0646449	0.0706999	0.0676724	0.0241214	0.0331619	0.0285977	0.00270401	0.00797243	0.00531386					5.1764	5.09422	5.13531	5.19237	4.99409	5.09323				5.16592	5.15987	5.1629	5.20645	5.19741	5.20197	5.22787	5.2226	5.22526					12_MeNH2-Water_1.25_dimer.out	12_MeNH2-Water_1.25.xyz	-172.102	-171.333	-172.054	-171.322
3.15494	12_MeNH2-Water_1.50_dimer.out	0.0791909	0.116912	0.0980513	0.0452033	0.149843	0.0975234	0.101474	0.0953203	0.0983974	0.0399684	0.0300148	0.0350162	0.030053	0.0172827	0.0237319					3.07575	3.03803	3.05689	3.10973	3.00509	3.05741				3.05346	3.05962	3.05654	3.11497	3.12492	3.11992	3.12488	3.13765	3.1312					12_MeNH2-Water_1.50_dimer.out	12_MeNH2-Water_1.50.xyz	-172.099	-171.331	-172.051	-171.319
1.19627	12_MeNH2-Water_2.00_dimer.out	0.0274098	0.0342939	0.0308519	0.00574237	0.0364906	0.0211165	0.0416157	0.0328537	0.0372347	0.0195292	0.0104095	0.0149672	0.0148103	0.00510486	0.00995676					1.16886	1.16198	1.16542	1.19053	1.15978	1.17515				1.15465	1.16342	1.15904	1.17674	1.18586	1.1813	1.18146	1.19117	1.18631					12_MeNH2-Water_2.00_dimer.out	12_MeNH2-Water_2.00.xyz	-172.096	-171.328	-172.048	-171.317
5.75338	13_Peptide-MeOH_0.90_dimer.out	0.169801	0.42473	0.297266	0.0800916	0.736608	0.40835	0.228618	0.220252	0.224435	0.0519054	0.0720436	0.061613	0.0373435	0.0315587	0.0348386					5.58358	5.32865	5.45612	5.67329	5.01677	5.34503				5.52476	5.53313	5.52895	5.70148	5.68134	5.69177	5.79073	5.78494	5.78822					13_Peptide-MeOH_0.90_dimer.out	13_Peptide-MeOH_0.90.xyz	-363.807	-362.221	-363.709	-362.197
6.16512	13_Peptide-MeOH_0.95_dimer.out	0.140502	0.363029	0.251766	0.0700089	0.632072	0.351041	0.18672	0.186634	0.186677	0.0236888	0.0526837	0.0378222	0.0536788	0.0368692	0.0456906					6.02462	5.8021	5.91336	6.09512	5.53305	5.81408				5.9784	5.97849	5.97845	6.14144	6.11244	6.1273	6.2188	6.20199	6.21081					13_Peptide-MeOH_0.95_dimer.out	13_Peptide-MeOH_0.95.xyz	-363.807	-362.222	-363.71	-362.199
6.22026	13_Peptide-MeOH_1.00_dimer.out	0.124206	0.319431	0.221818	0.0651594	0.547568	0.306364	0.162919	0.169856	0.166388	0.00627505	0.0394922	0.0225521	0.0603675	0.0364535	0.0488181					6.09605	5.90083	5.99844	6.1551	5.67269	5.9139				6.05734	6.0504	6.05387	6.21398	6.18077	6.19771	6.28063	6.25671	6.26908					13_Peptide-MeOH_1.00_dimer.out	13_Peptide-MeOH_1.00.xyz	-363.807	-362.223	-363.71	-362.2
6.05408	13_Peptide-MeOH_1.05_dimer.out	0.134383	0.302166	0.218274	0.070417	0.480518	0.275468	0.176322	0.185231	0.180777	0.0241085	0.056569	0.0400384	0.0364825	0.0126651	0.0249417					5.91969	5.75191	5.8358	5.98366	5.57356	5.77861				5.87775	5.86885	5.8733	6.02997	5.99751	6.01404	6.09056	6.06674	6.07902					13_Peptide-MeOH_1.05_dimer.out	13_Peptide-MeOH_1.05.xyz	-363.807	-362.224	-363.709	-362.2
5.75857	13_Peptide-MeOH_1.10_dimer.out	0.131816	0.278532	0.205174	0.0813911	0.432138	0.256764	0.164876	0.177823	0.17135	0.0144357	0.0472833	0.0305996	0.0337371	0.00836157	0.0213688					5.62676	5.48004	5.5534	5.67718	5.32644	5.50181				5.5937	5.58075	5.58722	5.74414	5.71129	5.72797	5.79231	5.76694	5.77994					13_Peptide-MeOH_1.10_dimer.out	13_Peptide-MeOH_1.10.xyz	-363.807	-362.224	-363.709	-362.201
4.60846	13_Peptide-MeOH_1.25_dimer.out	0.103073	0.201291	0.152182	0.0706868	0.289547	0.180117	0.124307	0.143427	0.133867	0.0115616	0.0265478	0.00724724	0.0410081	0.00731486	0.0244956					4.50539	4.40717	4.45628	4.53777	4.31891	4.42834				4.48415	4.46503	4.47459	4.62002	4.58191	4.60121	4.64947	4.61577	4.63295					13_Peptide-MeOH_1.25_dimer.out	13_Peptide-MeOH_1.25.xyz	-363.805	-362.223	-363.707	-362.2
2.94801	13_Peptide-MeOH_1.50_dimer.out	0.0868963	0.14017	0.113533	0.0619753	0.174871	0.118423	0.103235	0.117419	0.110327	0.00146149	0.0211336	0.00971483	0.0230569	0.00479067	0.0140652					2.86111	2.80784	2.83447	2.88603	2.77314	2.82958				2.84477	2.83059	2.83768	2.94947	2.92687	2.93829	2.97106	2.9528	2.96207					13_Peptide-MeOH_1.50_dimer.out	13_Peptide-MeOH_1.50.xyz	-363.802	-362.222	-363.705	-362.199
1.30709	13_Peptide-MeOH_2.00_dimer.out	0.0169215	0.034618	0.0257697	0.0081316	0.0477539	0.0279428	0.0226844	0.0260056	0.024345	0.00824256	0.00180694	0.00330015	0.0163205	0.00657543	0.011575					1.29017	1.27247	1.28132	1.29896	1.25934	1.27915				1.28441	1.28109	1.28275	1.31533	1.30529	1.31039	1.32341	1.31367	1.31867					13_Peptide-MeOH_2.00_dimer.out	13_Peptide-MeOH_2.00.xyz	-363.8	-362.22	-363.702	-362.197
6.90681	14_Peptide-MeNH2_0.90_dimer.out	0.167501	0.417707	0.292604	0.0525238	0.773777	0.41315	0.242883	0.184255	0.213569	0.110281	0.0757077	0.0926937	0.0211515	0.0266992	0.00308045					6.7393	6.4891	6.6142	6.85428	6.13303	6.49365				6.66392	6.72255	6.69324	6.79652	6.8311	6.81411	6.88565	6.9335	6.90989					14_Peptide-MeNH2_0.90_dimer.out	14_Peptide-MeNH2_0.90.xyz	-343.946	-342.382	-343.854	-342.36
7.41129	14_Peptide-MeNH2_0.95_dimer.out	0.170455	0.382913	0.276684	0.075665	0.692294	0.38398	0.232603	0.180072	0.206338	0.0717727	0.0399833	0.055606	0.0092014	0.0526519	0.0312178					7.24083	7.02837	7.1346	7.33562	6.71899	7.02731				7.17868	7.23121	7.20495	7.33951	7.3713	7.35568	7.42049	7.46394	7.4425					14_Peptide-MeNH2_0.95_dimer.out	14_Peptide-MeNH2_0.95.xyz	-343.947	-342.384	-343.855	-342.362
7.50022	14_Peptide-MeNH2_1.00_dimer.out	0.159821	0.340188	0.250004	0.0710701	0.59548	0.333275	0.218009	0.172809	0.195409	0.0703116	0.0459447	0.0578588	0.0027829	0.0367629	0.0200861					7.34039	7.16003	7.25021	7.42915	6.90474	7.16694				7.28221	7.32741	7.30481	7.4299	7.45427	7.44236	7.503	7.53698	7.5203					14_Peptide-MeNH2_1.00_dimer.out	14_Peptide-MeNH2_1.00.xyz	-343.947	-342.385	-343.855	-342.363
7.32364	14_Peptide-MeNH2_1.05_dimer.out	0.14167	0.299029	0.22035	0.058406	0.503412	0.280909	0.19626	0.165029	0.180645	0.0683266	0.0576143	0.06271	0.00400369	0.0158416	0.00621777					7.18197	7.02461	7.10329	7.26523	6.82022	7.04273				7.12737	7.15861	7.14299	7.25531	7.26602	7.26093	7.31963	7.33948	7.32985					14_Peptide-MeNH2_1.05_dimer.out	14_Peptide-MeNH2_1.05.xyz	-343.947	-342.386	-343.855	-342.364
6.98556	14_Peptide-MeNH2_1.10_dimer.out	0.122784	0.259951	0.191367	0.0578113	0.432322	0.245067	0.165383	0.146938	0.15616	0.0358102	0.0402886	0.0377622	0.0245334	0.0286183	0.0269212					6.86277	6.72561	6.79419	6.92775	6.55324	6.74049				6.82018	6.83862	6.8294	6.94975	6.94527	6.9478	7.01009	7.01418	7.01248					14_Peptide-MeNH2_1.10_dimer.out	14_Peptide-MeNH2_1.10.xyz	-343.946	-342.386	-343.854	-342.364
5.61042	14_Peptide-MeNH2_1.25_dimer.out	0.10357	0.192138	0.147854	0.0543956	0.296004	0.1752	0.13581	0.124039	0.129925	0.00561174	0.0112157	0.00818714	0.0334114	0.0348732	0.03441					5.50685	5.41828	5.46256	5.55602	5.31441	5.43522				5.47461	5.48638	5.48049	5.6048	5.5992	5.60223	5.64383	5.64529	5.64483					14_Peptide-MeNH2_1.25_dimer.out	14_Peptide-MeNH2_1.25.xyz	-343.944	-342.385	-343.852	-342.364
3.54879	14_Peptide-MeNH2_1.50_dimer.out	0.1017	0.148969	0.125334	0.0549945	0.194254	0.124624	0.132322	0.119278	0.1258	0.015321	0.00991715	0.0125029	0.00780797	0.0186782	0.013362					3.44709	3.39982	3.42346	3.4938	3.35454	3.42417				3.41647	3.42951	3.42299	3.53347	3.53887	3.53629	3.5566	3.56747	3.56215					14_Peptide-MeNH2_1.50_dimer.out	14_Peptide-MeNH2_1.50.xyz	-343.941	-342.384	-343.849	-342.362
1.4882	14_Peptide-MeNH2_2.00_dimer.out	0.0301019	0.0465757	0.0383388	0.0048541	0.058791	0.0318226	0.0466553	0.0385669	0.0426111	0.00600558	0.00163017	0.00376591	0.00235588	0.00797537	0.00523479					1.4581	1.44162	1.44986	1.48335	1.42941	1.45638				1.44154	1.44963	1.44559	1.48219	1.48657	1.48443	1.49056	1.49617	1.49343					14_Peptide-MeNH2_2.00_dimer.out	14_Peptide-MeNH2_2.00.xyz	-343.938	-342.381	-343.846	-342.36
8.09631	15_Peptide-Peptide_0.90_dimer.out	0.31353	0.592957	0.453244	0.145316	0.989465	0.567391	0.423818	0.332992	0.378405	0.142685	0.111015	0.126124	0.0082037	0.0364052	0.0150953					7.78278	7.50335	7.64306	7.95099	7.10684	7.52892				7.67249	7.76332	7.7179	7.95362	7.98529	7.97018	8.0881	8.13271	8.1114					15_Peptide-Peptide_0.90_dimer.out	15_Peptide-Peptide_0.90.xyz	-496.422	-494.24	-496.29	-494.209
8.58646	15_Peptide-Peptide_0.95_dimer.out	0.290685	0.530602	0.410643	0.143489	0.860559	0.502024	0.387191	0.31427	0.350731	0.117569	0.108095	0.112061	0.00423233	0.0259175	0.0161361					8.29578	8.05586	8.17582	8.44297	7.7259	8.08444				8.19927	8.27219	8.23573	8.46889	8.47837	8.4744	8.5907	8.61238	8.6026					15_Peptide-Peptide_0.95_dimer.out	15_Peptide-Peptide_0.95.xyz	-496.422	-494.242	-496.291	-494.211
8.65929	15_Peptide-Peptide_1.00_dimer.out	0.272768	0.477302	0.375035	0.140261	0.754681	0.447471	0.359644	0.295443	0.327544	0.112013	0.111789	0.111131	0.00694117	0.002932	0.00091671					8.38652	8.18199	8.28426	8.51903	7.90461	8.21182				8.29965	8.36385	8.33175	8.54728	8.5475	8.54816	8.65235	8.66222	8.65838					15_Peptide-Peptide_1.00_dimer.out	15_Peptide-Peptide_1.00.xyz	-496.423	-494.243	-496.291	-494.212
8.46406	15_Peptide-Peptide_1.05_dimer.out	0.251361	0.425932	0.338646	0.126653	0.657603	0.392128	0.333124	0.27404	0.303582	0.108023	0.109924	0.108242	0.0166288	0.00968501	0.012126					8.21269	8.03812	8.12541	8.3374	7.80645	8.07193				8.13093	8.19002	8.16047	8.35603	8.35413	8.35581	8.44743	8.45437	8.45193					15_Peptide-Peptide_1.05_dimer.out	15_Peptide-Peptide_1.05.xyz	-496.422	-494.244	-496.291	-494.212
8.10479	15_Peptide-Peptide_1.10_dimer.out	0.235081	0.383426	0.309254	0.115865	0.573815	0.34484	0.313244	0.2586	0.285922	0.103314	0.108533	0.105209	0.0206419	0.0189051	0.0187445					7.86971	7.72136	7.79554	7.98892	7.53097	7.75995				7.79155	7.84619	7.81887	8.00147	7.99626	7.99958	8.08415	8.08588	8.08604					15_Peptide-Peptide_1.10_dimer.out	15_Peptide-Peptide_1.10.xyz	-496.422	-494.244	-496.29	-494.213
6.64877	15_Peptide-Peptide_1.25_dimer.out	0.241441	0.342313	0.291877	0.14347	0.446761	0.295115	0.305674	0.273834	0.289754	0.0984137	0.11148	0.104397	0.0404971	0.046636	0.0427949					6.40733	6.30646	6.35689	6.5053	6.20201	6.35366				6.3431	6.37494	6.35902	6.55036	6.53729	6.54437	6.60827	6.60213	6.60598					15_Peptide-Peptide_1.25_dimer.out	15_Peptide-Peptide_1.25.xyz	-496.419	-494.243	-496.288	-494.212
4.40743	15_Peptide-Peptide_1.50_dimer.out	0.163883	0.215366	0.189625	0.0995565	0.266085	0.182821	0.206058	0.182113	0.194086	0.0628626	0.0596181	0.0609737	0.0311176	0.02197	0.0262004					4.24355	4.19206	4.2178	4.30787	4.14134	4.22461				4.20137	4.22532	4.21334	4.34457	4.34781	4.34646	4.37631	4.38546	4.38123					15_Peptide-Peptide_1.50_dimer.out	15_Peptide-Peptide_1.50.xyz	-496.416	-494.241	-496.284	-494.21
1.7751	15_Peptide-Peptide_2.00_dimer.out	0.0496211	0.0569699	0.0532955	0.0127731	0.0608946	0.0368339	0.07378	0.0543966	0.0640883	0.0295144	0.0220021	0.0256158	0.0139941	0.00557946	0.00957396					1.72548	1.71813	1.72181	1.76233	1.71421	1.73827				1.70132	1.72071	1.71101	1.74559	1.7531	1.74949	1.76111	1.76952	1.76553					15_Peptide-Peptide_2.00_dimer.out	15_Peptide-Peptide_2.00.xyz	-496.412	-494.238	-496.28	-494.207
4.76122	16_Peptide-Water_0.90_dimer.out	0.154392	0.342991	0.248692	0.053685	0.584269	0.318977	0.220419	0.184801	0.20261	0.0894765	0.0526909	0.0710602	0.037712	0.00926412	0.014298					4.60682	4.41823	4.51252	4.70753	4.17695	4.44224				4.5408	4.57642	4.55861	4.67174	4.70853	4.69016	4.7235	4.77048	4.74692					16_Peptide-Water_0.90_dimer.out	16_Peptide-Water_0.90.xyz	-324.576	-323.187	-324.488	-323.166
5.10831	16_Peptide-Water_0.95_dimer.out	0.136667	0.297751	0.217209	0.0345348	0.493893	0.264214	0.203628	0.169154	0.186391	0.0927331	0.0564634	0.0745872	0.0486583	0.00247898	0.0256649					4.97165	4.81056	4.89111	5.07378	4.61442	4.8441				4.90469	4.93916	4.92192	5.01558	5.05185	5.03373	5.05966	5.10584	5.08265					16_Peptide-Water_0.95_dimer.out	16_Peptide-Water_0.95.xyz	-324.576	-323.189	-324.488	-323.168
5.14965	16_Peptide-Water_1.00_dimer.out	0.123951	0.265621	0.194786	0.0140031	0.412215	0.213109	0.196036	0.169508	0.182772	0.101093	0.0716981	0.0864005	0.0625459	0.0230966	0.0429499					5.0257	4.88403	4.95486	5.13565	4.73744	4.93654				4.95361	4.98014	4.96688	5.04856	5.07795	5.06325	5.0871	5.12655	5.1067					16_Peptide-Water_1.00_dimer.out	16_Peptide-Water_1.00.xyz	-324.576	-323.189	-324.488	-323.168
5.00493	16_Peptide-Water_1.05_dimer.out	0.106401	0.228331	0.167366	0.00959561	0.354826	0.182211	0.16987	0.145396	0.157633	0.0784727	0.0516191	0.0650467	0.0475134	0.0119891	0.0298564					4.89853	4.7766	4.83756	4.99533	4.6501	4.82272				4.83506	4.85953	4.8473	4.92646	4.95331	4.93988	4.95742	4.99294	4.97507					16_Peptide-Water_1.05_dimer.out	16_Peptide-Water_1.05.xyz	-324.576	-323.189	-324.488	-323.168
4.75391	16_Peptide-Water_1.10_dimer.out	0.126007	0.230843	0.178425	0.0289004	0.323573	0.176237	0.189673	0.170046	0.17986	0.0721023	0.0578456	0.0648825	0.0440217	0.0234285	0.0336536					4.6279	4.52306	4.57548	4.72501	4.43033	4.57767				4.56423	4.58386	4.57405	4.6818	4.69606	4.68902	4.70988	4.73048	4.72025					16_Peptide-Water_1.10_dimer.out	16_Peptide-Water_1.10.xyz	-324.576	-323.189	-324.488	-323.168
3.79918	16_Peptide-Water_1.25_dimer.out	0.0788898	0.151533	0.115211	0.00796781	0.199968	0.0960002	0.135837	0.119777	0.127807	0.0615948	0.0491092	0.0552923	0.0408619	0.0264989	0.0335962					3.72029	3.64764	3.68397	3.80714	3.59921	3.70318				3.66334	3.6794	3.67137	3.73758	3.75007	3.74388	3.75831	3.77268	3.76558					16_Peptide-Water_1.25_dimer.out	16_Peptide-Water_1.25.xyz	-324.574	-323.189	-324.486	-323.168
2.45383	16_Peptide-Water_1.50_dimer.out	0.0560843	0.0978731	0.0769787	0.0190612	0.114059	0.0474989	0.105352	0.0872612	0.0963067	0.0521568	0.0369824	0.0445229	0.0387277	0.0228074	0.0306927					2.39775	2.35596	2.37685	2.47289	2.33977	2.40633				2.34848	2.36657	2.35753	2.40168	2.41685	2.40931	2.4151	2.43102	2.42314					16_Peptide-Water_1.50_dimer.out	16_Peptide-Water_1.50.xyz	-324.572	-323.187	-324.484	-323.166
1.13683	16_Peptide-Water_2.00_dimer.out	0.0100275	0.0245079	0.0172677	0.0394688	0.0279294	0.00576968	0.042479	0.0222646	0.0323718	0.0297481	0.0117777	0.0207347	0.0232271	0.00578771	0.0144511					1.1268	1.11232	1.11956	1.1763	1.1089	1.1426				1.09435	1.11457	1.10446	1.10708	1.12505	1.1161	1.1136	1.13104	1.12238					16_Peptide-Water_2.00_dimer.out	16_Peptide-Water_2.00.xyz	-324.57	-323.185	-324.482	-323.164
16.0658	17_Uracil-Uracil_BP_0.90_dimer.out	0.882752	1.42885	1.1558	0.64953	2.20276	1.42615	1.03566	0.921452	0.978556	0.377065	0.300937	0.338401	0.168241	0.0621211	0.114532					15.183	14.6369	14.91	15.4162	13.863	14.6396				15.0301	15.1443	15.0872	15.6887	15.7648	15.7274	15.8975	16.0036	15.9512					17_Uracil-Uracil_BP_0.90_dimer.out	17_Uracil-Uracil_BP_0.90.xyz	-828.641	-825.312	-828.428	-825.262
17.1875	17_Uracil-Uracil_BP_0.95_dimer.out	0.828745	1.29197	1.06036	0.590844	1.95176	1.2713	0.984721	0.859399	0.92206	0.371238	0.286008	0.328014	0.189581	0.0769053	0.132563					16.3587	15.8955	16.1271	16.5966	15.2357	15.9162				16.2027	16.3281	16.2654	16.8162	16.9014	16.8594	16.9979	17.1105	17.0549					17_Uracil-Uracil_BP_0.95_dimer.out	17_Uracil-Uracil_BP_0.95.xyz	-828.643	-825.316	-828.43	-825.265
17.4054	17_Uracil-Uracil_BP_1.00_dimer.out	0.754126	1.15715	0.95564	0.531425	1.71802	1.12472	0.900137	0.789429	0.844783	0.348934	0.277776	0.312769	0.191789	0.0971538	0.143788					16.6513	16.2483	16.4498	16.874	15.6874	16.2807				16.5053	16.616	16.5607	17.0565	17.1277	17.0927	17.2137	17.3083	17.2617					17_Uracil-Uracil_BP_1.00_dimer.out	17_Uracil-Uracil_BP_1.00.xyz	-828.644	-825.317	-828.43	-825.266
17.0338	17_Uracil-Uracil_BP_1.05_dimer.out	0.670098	1.02057	0.845336	0.474188	1.50631	0.990249	0.798543	0.702109	0.750326	0.308171	0.249786	0.278426	0.165683	0.0866308	0.125498					16.3637	16.0132	16.1884	16.5596	15.5275	16.0435				16.2352	16.3317	16.2835	16.7256	16.784	16.7554	16.8681	16.9472	16.9083					17_Uracil-Uracil_BP_1.05_dimer.out	17_Uracil-Uracil_BP_1.05.xyz	-828.643	-825.318	-828.43	-825.267
16.293	17_Uracil-Uracil_BP_1.10_dimer.out	0.614586	0.913305	0.763946	0.421554	1.31116	0.866355	0.741144	0.65246	0.696802	0.265131	0.211053	0.23758	0.137331	0.0597064	0.0979792					15.6784	15.3797	15.529	15.8714	14.9818	15.4266				15.5518	15.6405	15.5962	16.0278	16.0819	16.0554	16.1556	16.2333	16.195					17_Uracil-Uracil_BP_1.10_dimer.out	17_Uracil-Uracil_BP_1.10.xyz	-828.642	-825.317	-828.429	-825.266
13.1904	17_Uracil-Uracil_BP_1.25_dimer.out	0.473144	0.670365	0.571755	0.308072	0.890634	0.599353	0.581371	0.525949	0.55366	0.211917	0.194619	0.202748	0.120044	0.0866997	0.10274					12.7173	12.5201	12.6187	12.8824	12.2998	12.5911				12.6091	12.6645	12.6368	12.9785	12.9958	12.9877	13.0704	13.1037	13.0877					17_Uracil-Uracil_BP_1.25_dimer.out	17_Uracil-Uracil_BP_1.25.xyz	-828.637	-825.314	-828.424	-825.264
8.35706	17_Uracil-Uracil_BP_1.50_dimer.out	0.315428	0.42657	0.370999	0.218158	0.521325	0.369741	0.379201	0.364445	0.371823	0.14156	0.156442	0.14861	0.0947474	0.0988669	0.0963323					8.04164	7.93049	7.98607	8.13891	7.83574	7.98732				7.97786	7.99262	7.98524	8.2155	8.20062	8.20845	8.26232	8.2582	8.26073					17_Uracil-Uracil_BP_1.50_dimer.out	17_Uracil-Uracil_BP_1.50.xyz	-828.63	-825.309	-828.416	-825.258
3.33743	17_Uracil-Uracil_BP_2.00_dimer.out	0.12269	0.161035	0.141863	0.0517589	0.174115	0.112937	0.169195	0.152459	0.160827	0.0749128	0.0825492	0.0784376	0.0544576	0.0584952	0.0560725					3.21474	3.17639	3.19556	3.28567	3.16331	3.22449				3.16823	3.18497	3.1766	3.26251	3.25488	3.25899	3.28297	3.27893	3.28135					17_Uracil-Uracil_BP_2.00_dimer.out	17_Uracil-Uracil_BP_2.00.xyz	-828.622	-825.302	-828.409	-825.251
6.4838	18_Water-Pyridine_0.90_dimer.out	0.0460685	0.315289	0.180679	0.0982242	0.614474	0.258125	0.140672	0.119132	0.129902	0.0606212	0.0357024	0.0481767	0.00125521	0.0404144	0.0193381					6.43773	6.16851	6.30312	6.58202	5.86933	6.22568				6.34313	6.36467	6.3539	6.42318	6.4481	6.43562	6.48255	6.52421	6.50314					18_Water-Pyridine_0.90_dimer.out	18_Water-Pyridine_0.90.xyz	-324.282	-322.863	-324.197	-322.844
6.87005	18_Water-Pyridine_0.95_dimer.out	0.0711127	0.301668	0.18639	0.0744937	0.546171	0.235839	0.166577	0.141362	0.15397	0.0688066	0.0422496	0.0555158	0.0171288	0.0253475	0.00392015					6.79894	6.56838	6.68366	6.94454	6.32388	6.63421				6.70347	6.72869	6.71608	6.80124	6.8278	6.81453	6.85292	6.8954	6.87397					18_Water-Pyridine_0.95_dimer.out	18_Water-Pyridine_0.95.xyz	-324.282	-322.865	-324.198	-322.845
6.87888	18_Water-Pyridine_1.00_dimer.out	0.0658308	0.26229	0.16406	0.0750889	0.465336	0.195123	0.158223	0.129166	0.143694	0.0634247	0.0321245	0.0477729	0.0179832	0.0279194	0.00478006					6.81305	6.61659	6.71482	6.95397	6.41354	6.68376				6.72066	6.74971	6.73519	6.81545	6.84676	6.83111	6.8609	6.9068	6.88366					18_Water-Pyridine_1.00_dimer.out	18_Water-Pyridine_1.00.xyz	-324.282	-322.865	-324.198	-322.846
6.65261	18_Water-Pyridine_1.05_dimer.out	0.0606467	0.230528	0.145587	0.0694753	0.399191	0.164858	0.145959	0.119947	0.132953	0.0546071	0.0256832	0.0401518	0.011668	0.0302099	0.0090952					6.59196	6.42208	6.50702	6.72208	6.25341	6.48775				6.50665	6.53266	6.51965	6.598	6.62692	6.61245	6.64094	6.68282	6.6617					18_Water-Pyridine_1.05_dimer.out	18_Water-Pyridine_1.05.xyz	-324.282	-322.866	-324.198	-322.846
6.28924	18_Water-Pyridine_1.10_dimer.out	0.0535977	0.201137	0.127367	0.0664261	0.340449	0.137012	0.132289	0.109798	0.121044	0.0372577	0.0106274	0.0239617	0.0008008	0.0372517	0.0180529					6.23565	6.08811	6.16188	6.35567	5.94879	6.15223				6.15695	6.17945	6.1682	6.25199	6.27862	6.26528	6.28844	6.3265	6.3073					18_Water-Pyridine_1.10_dimer.out	18_Water-Pyridine_1.10.xyz	-324.281	-322.866	-324.197	-322.846
4.92902	18_Water-Pyridine_1.25_dimer.out	0.0322692	0.132063	0.0821659	0.0597588	0.203302	0.0717715	0.0926059	0.0853558	0.0889808	0.0160729	0.0154601	0.0156725	0.0109025	0.0185898	0.014801					4.89675	4.79696	4.84686	4.98878	4.72572	4.85725				4.83642	4.84367	4.84004	4.91295	4.91356	4.91335	4.93993	4.94761	4.94382					18_Water-Pyridine_1.25_dimer.out	18_Water-Pyridine_1.25.xyz	-324.279	-322.864	-324.195	-322.845
3.00623	18_Water-Pyridine_1.50_dimer.out	0.0527734	0.106887	0.0798304	0.014715	0.124355	0.0548198	0.0970212	0.0954354	0.0962283	0.0152865	0.0157803	0.015488	0.0014855	0.00278027	0.000661278					2.95346	2.89934	2.9264	3.02094	2.88188	2.95141				2.90921	2.91079	2.91	2.99094	2.99045	2.99074	3.00474	3.00901	3.00689					18_Water-Pyridine_1.50_dimer.out	18_Water-Pyridine_1.50.xyz	-324.276	-322.862	-324.192	-322.843
1.18444	18_Water-Pyridine_2.00_dimer.out	0.00848946	0.029571	0.0190302	0.0108047	0.0343781	0.0117867	0.0211394	0.0264193	0.0237793	0.00265543	0.00852058	0.00557647	0.00225085	0.00309972	0.000409302					1.17596	1.15487	1.16541	1.19525	1.15007	1.17266				1.16331	1.15803	1.16067	1.18179	1.17592	1.17887	1.1867	1.18135	1.18404					18_Water-Pyridine_2.00_dimer.out	18_Water-Pyridine_2.00.xyz	-324.273	-322.86	-324.189	-322.84
6.8755	19_MeOH-Pyridine_0.90_dimer.out	0.0505164	0.344813	0.197665	0.114234	0.665051	0.275409	0.158532	0.134854	0.146693	0.0738754	0.0654426	0.0694684	0.00364165	0.0292977	0.0165347					6.82499	6.53069	6.67784	6.98974	6.21045	6.60009				6.71697	6.74065	6.72881	6.80163	6.81006	6.80603	6.87914	6.9048	6.89204					19_MeOH-Pyridine_0.90_dimer.out	19_MeOH-Pyridine_0.90.xyz	-363.511	-361.896	-363.417	-361.874
7.37372	19_MeOH-Pyridine_0.95_dimer.out	0.0827	0.332529	0.207614	0.0903472	0.590456	0.250054	0.196156	0.163423	0.179789	0.0916792	0.0739216	0.0826073	0.0234155	0.00976546	0.00672889					7.29102	7.04119	7.1661	7.46406	6.78326	7.12366				7.17756	7.2103	7.19393	7.28204	7.2998	7.29111	7.3503	7.38348	7.36699					19_MeOH-Pyridine_0.95_dimer.out	19_MeOH-Pyridine_0.95.xyz	-363.512	-361.898	-363.418	-361.876
7.44822	19_MeOH-Pyridine_1.00_dimer.out	0.0717933	0.284982	0.178388	0.0777003	0.511756	0.217028	0.169806	0.136302	0.153054	0.0530094	0.0336921	0.0431628	0.0137854	0.0477899	0.0308894					7.37643	7.16324	7.26984	7.52592	6.93647	7.2312				7.27842	7.31192	7.29517	7.39521	7.41453	7.40506	7.46201	7.49601	7.47911					19_MeOH-Pyridine_1.00_dimer.out	19_MeOH-Pyridine_1.00.xyz	-363.512	-361.899	-363.418	-361.877
7.25343	19_MeOH-Pyridine_1.05_dimer.out	0.0780359	0.263319	0.170678	0.0619453	0.451856	0.194955	0.169812	0.139708	0.15476	0.0467453	0.0287448	0.0375783	0.0138461	0.0448287	0.0294331					7.17539	6.99011	7.08275	7.31537	6.80157	7.05847				7.08362	7.11372	7.09867	7.20668	7.22468	7.21585	7.26727	7.29826	7.28286					19_MeOH-Pyridine_1.05_dimer.out	19_MeOH-Pyridine_1.05.xyz	-363.512	-361.899	-363.418	-361.877
6.89666	19_MeOH-Pyridine_1.10_dimer.out	0.0702857	0.233806	0.152046	0.0538134	0.389582	0.167884	0.151649	0.131673	0.141661	0.0156925	0.00454382	0.00998374	0.0396225	0.0624257	0.0510929					6.82638	6.66286	6.74462	6.95048	6.50708	6.72878				6.74501	6.76499	6.755	6.88097	6.89212	6.88668	6.93629	6.95909	6.94776					19_MeOH-Pyridine_1.10_dimer.out	19_MeOH-Pyridine_1.10.xyz	-363.511	-361.899	-363.417	-361.877
5.47291	19_MeOH-Pyridine_1.25_dimer.out	0.0552968	0.169412	0.112354	0.0384932	0.248887	0.105197	0.116789	0.117305	0.117047	0.0028033	0.0103591	0.00647244	0.0325339	0.0333349	0.0330024					5.41761	5.3035	5.36056	5.5114	5.22402	5.36771				5.35612	5.35561	5.35586	5.47011	5.46255	5.46644	5.50544	5.50625	5.50591					19_MeOH-Pyridine_1.25_dimer.out	19_MeOH-Pyridine_1.25.xyz	-363.509	-361.898	-363.415	-361.876
3.37293	19_MeOH-Pyridine_1.50_dimer.out	0.0660983	0.133219	0.0996587	0.00652224	0.157846	0.082184	0.105158	0.117073	0.111116	0.00841697	0.00759373	0.000487973	0.0264793	0.0156438	0.0211229					3.30683	3.23971	3.27327	3.3664	3.21508	3.29074				3.26777	3.25585	3.26181	3.38134	3.36533	3.37341	3.39941	3.38857	3.39405					19_MeOH-Pyridine_1.50_dimer.out	19_MeOH-Pyridine_1.50.xyz	-363.506	-361.896	-363.411	-361.874
1.32821	19_MeOH-Pyridine_2.00_dimer.out	0.0067212	0.0340005	0.0203609	0.014032	0.0359395	0.0109537	0.0203277	0.0327293	0.0265285	0.016927	0.00276046	0.0098734	0.0270308	0.0145761	0.0208327					1.32149	1.29421	1.30785	1.34224	1.29227	1.31726				1.30788	1.29548	1.30168	1.34514	1.33097	1.33808	1.35524	1.34279	1.34904					19_MeOH-Pyridine_2.00_dimer.out	19_MeOH-Pyridine_2.00.xyz	-363.503	-361.894	-363.408	-361.872
17.9251	20_AcOH-AcOH_0.90_dimer.out	0.822854	1.44702	1.13494	0.81641	2.38109	1.59875	0.827079	0.834603	0.830841	0.282007	0.272426	0.277253	0.112156	0.0739877	0.0933815					17.1023	16.4781	16.7902	17.1087	15.5441	16.3264				17.0981	17.0905	17.0943	17.6431	17.6527	17.6479	17.813	17.8512	17.8318					20_AcOH-AcOH_0.90_dimer.out	20_AcOH-AcOH_0.90.xyz	-457.683	-455.855	-457.561	-455.826
19.1701	20_AcOH-AcOH_0.95_dimer.out	0.844904	1.36735	1.10613	0.816792	2.17579	1.49629	0.863334	0.837313	0.850324	0.287519	0.236253	0.262004	0.12354	0.0383443	0.0814545					18.3252	17.8027	18.064	18.3533	16.9943	17.6738				18.3068	18.3328	18.3198	18.8826	18.9338	18.9081	19.0466	19.1317	19.0886					20_AcOH-AcOH_0.95_dimer.out	20_AcOH-AcOH_0.95.xyz	-457.685	-455.858	-457.563	-455.829
19.3967	20_AcOH-AcOH_1.00_dimer.out	0.867474	1.30921	1.08834	0.818936	1.9903	1.40462	0.899297	0.862672	0.880984	0.298876	0.252173	0.275469	0.145961	0.0711552	0.108724					18.5292	18.0875	18.3084	18.5778	17.4064	17.9921				18.4974	18.534	18.5157	19.0978	19.1445	19.1213	19.2508	19.3256	19.288					20_AcOH-AcOH_1.00_dimer.out	20_AcOH-AcOH_1.00.xyz	-457.686	-455.86	-457.564	-455.83
18.9647	20_AcOH-AcOH_1.05_dimer.out	0.791279	1.17342	0.982349	0.733104	1.75626	1.24468	0.829421	0.791287	0.810354	0.288312	0.237099	0.262699	0.141253	0.0650422	0.103351					18.1734	17.7913	17.9824	18.2316	17.2084	17.72				18.1353	18.1734	18.1544	18.6764	18.7276	18.702	18.8235	18.8997	18.8614					20_AcOH-AcOH_1.05_dimer.out	20_AcOH-AcOH_1.05.xyz	-457.685	-455.86	-457.563	-455.83
18.1251	20_AcOH-AcOH_1.10_dimer.out	0.708427	1.03588	0.872155	0.66086	1.55261	1.10673	0.739613	0.697103	0.718358	0.255407	0.204529	0.229926	0.127926	0.0578629	0.092973					17.4167	17.0892	17.253	17.4643	16.5725	17.0184				17.3855	17.428	17.4068	17.8697	17.9206	17.8952	17.9972	18.0673	18.0322					20_AcOH-AcOH_1.10_dimer.out	20_AcOH-AcOH_1.10.xyz	-457.684	-455.859	-457.562	-455.83
14.6347	20_AcOH-AcOH_1.25_dimer.out	0.50564	0.715531	0.610586	0.414422	1.01292	0.713673	0.565445	0.520551	0.542998	0.250245	0.206446	0.228246	0.156827	0.0984113	0.127593					14.1291	13.9192	14.0242	14.2203	13.6218	13.9211				14.0693	14.1142	14.0917	14.3845	14.4283	14.4065	14.4779	14.5363	14.5072					20_AcOH-AcOH_1.25_dimer.out	20_AcOH-AcOH_1.25.xyz	-457.679	-455.855	-457.557	-455.826
9.21926	20_AcOH-AcOH_1.50_dimer.out	0.406656	0.512227	0.459442	0.315571	0.612483	0.464027	0.466375	0.446497	0.456436	0.216139	0.201701	0.208791	0.177259	0.1573	0.167108					8.8126	8.70703	8.75982	8.90369	8.60678	8.75523				8.75288	8.77276	8.76282	9.00312	9.01756	9.01047	9.042	9.06196	9.05215					20_AcOH-AcOH_1.50_dimer.out	20_AcOH-AcOH_1.50.xyz	-457.67	-455.848	-457.548	-455.819
3.59408	20_AcOH-AcOH_2.00_dimer.out	0.118012	0.168015	0.143013	0.0815759	0.19325	0.137413	0.141901	0.151469	0.146685	0.0615616	0.0738899	0.0676732	0.0410859	0.0528428	0.0468687					3.47607	3.42606	3.45107	3.5125	3.40083	3.45667				3.45218	3.44261	3.44739	3.53252	3.52019	3.52641	3.55299	3.54124	3.54721					20_AcOH-AcOH_2.00_dimer.out	20_AcOH-AcOH_2.00.xyz	-457.662	-455.84	-457.54	-455.811
15.2739	21_AcNH2-AcNH2_0.90_dimer.out	0.681251	1.12484	0.903044	0.766572	1.97734	1.37195	0.625312	0.56591	0.595611	0.0978304	0.0202394	0.0590883	0.0642059	0.170539	0.117027					14.5926	14.1491	14.3709	14.5073	13.2966	13.9019				14.6486	14.708	14.6783	15.1761	15.2537	15.2148	15.3381	15.4444	15.3909					21_AcNH2-AcNH2_0.90_dimer.out	21_AcNH2-AcNH2_0.90.xyz	-417.944	-416.164	-417.832	-416.138
16.2994	21_AcNH2-AcNH2_0.95_dimer.out	0.671113	1.04911	0.860113	0.70604	1.74118	1.22361	0.648214	0.59537	0.621792	0.157702	0.090492	0.124119	0.00998354	0.0834882	0.0364783					15.6283	15.2503	15.4393	15.5934	14.5583	15.0758				15.6512	15.7041	15.6776	16.1417	16.2089	16.1753	16.2894	16.3829	16.3359					21_AcNH2-AcNH2_0.95_dimer.out	21_AcNH2-AcNH2_0.95.xyz	-417.946	-416.167	-417.834	-416.141
16.4717	21_AcNH2-AcNH2_1.00_dimer.out	0.609622	0.93235	0.770986	0.624178	1.50703	1.0656	0.600078	0.55557	0.577824	0.168784	0.112156	0.140483	0.0367744	0.042473	0.00262555					15.862	15.5393	15.7007	15.8475	14.9646	15.4061				15.8716	15.9161	15.8938	16.3029	16.3595	16.3312	16.4349	16.5141	16.4743					21_AcNH2-AcNH2_1.00_dimer.out	21_AcNH2-AcNH2_1.00.xyz	-417.946	-416.169	-417.835	-416.142
16.094	21_AcNH2-AcNH2_1.05_dimer.out	0.539691	0.817881	0.678786	0.536595	1.29118	0.913885	0.541721	0.507573	0.524647	0.165688	0.119199	0.142475	0.0362552	0.0342207	0.00130127					15.5543	15.2761	15.4152	15.5574	14.8029	15.1801				15.5523	15.5865	15.5694	15.9283	15.9748	15.9516	16.0578	16.1283	16.0927					21_AcNH2-AcNH2_1.05_dimer.out	21_AcNH2-AcNH2_1.05.xyz	-417.946	-416.169	-417.834	-416.143
15.3796	21_AcNH2-AcNH2_1.10_dimer.out	0.491883	0.72972	0.610802	0.464565	1.10462	0.78459	0.509793	0.483926	0.49686	0.183852	0.152829	0.168307	0.0721454	0.0212397	0.0468349					14.8877	14.6498	14.7688	14.915	14.275	14.595				14.8698	14.8956	14.8827	15.1957	15.2267	15.2113	15.3074	15.3583	15.3327					21_AcNH2-AcNH2_1.10_dimer.out	21_AcNH2-AcNH2_1.10.xyz	-417.944	-416.169	-417.833	-416.142
12.4598	21_AcNH2-AcNH2_1.25_dimer.out	0.380718	0.535356	0.458037	0.317186	0.724314	0.52075	0.422371	0.411468	0.41692	0.187007	0.170251	0.178628	0.114302	0.0830849	0.0988373					12.0791	11.9245	12.0018	12.1426	11.7355	11.9391				12.0374	12.0483	12.0429	12.2728	12.2896	12.2812	12.3455	12.3767	12.361					21_AcNH2-AcNH2_1.25_dimer.out	21_AcNH2-AcNH2_1.25.xyz	-417.94	-416.166	-417.829	-416.14
8.00668	21_AcNH2-AcNH2_1.50_dimer.out	0.258294	0.341974	0.300134	0.214942	0.414654	0.314798	0.286717	0.294322	0.29052	0.151465	0.153703	0.152606	0.126989	0.120935	0.124087					7.74838	7.6647	7.70654	7.79173	7.59202	7.69188				7.71996	7.71235	7.71616	7.85521	7.85297	7.85407	7.87969	7.88574	7.88259					21_AcNH2-AcNH2_1.50_dimer.out	21_AcNH2-AcNH2_1.50.xyz	-417.933	-416.161	-417.822	-416.134
3.00804	21_AcNH2-AcNH2_2.00_dimer.out	0.0571375	0.0827303	0.0699339	0.0537936	0.108916	0.0813548	0.0593299	0.0655621	0.062446	0.0163144	0.0269701	0.0215818	0.00802256	0.0135304	0.0107575					2.9509	2.92531	2.9381	2.95424	2.89912	2.92668				2.94871	2.94248	2.94559	2.99172	2.98107	2.98646	3.00002	2.99451	2.99728					21_AcNH2-AcNH2_2.00_dimer.out	21_AcNH2-AcNH2_2.00.xyz	-417.925	-416.154	-417.814	-416.127
18.3243	22_AcOH-Uracil_0.90_dimer.out	0.844958	1.42692	1.13594	0.742405	2.31382	1.52811	0.912195	0.84544	0.878817	0.313715	0.246592	0.279992	0.138527	0.0366958	0.0877148					17.4793	16.8973	17.1883	17.5818	16.0104	16.7961				17.4121	17.4788	17.4454	18.0105	18.0777	18.0443	18.1857	18.2876	18.2365					22_AcOH-Uracil_0.90_dimer.out	22_AcOH-Uracil_0.90.xyz	-643.164	-640.586	-642.997	-640.546
19.5241	22_AcOH-Uracil_0.95_dimer.out	0.862775	1.3621	1.11244	0.752969	2.12072	1.43684	0.934768	0.864731	0.89975	0.324697	0.254876	0.289615	0.151626	0.0454105	0.0986338					18.6613	18.162	18.4117	18.7711	17.4034	18.0873				18.5893	18.6594	18.6244	19.1994	19.2692	19.2345	19.3725	19.4787	19.4255					22_AcOH-Uracil_0.95_dimer.out	22_AcOH-Uracil_0.95.xyz	-643.166	-640.589	-642.998	-640.549
19.7586	22_AcOH-Uracil_1.00_dimer.out	0.797606	1.22873	1.01317	0.692017	1.88934	1.29068	0.866834	0.795615	0.831224	0.291179	0.222329	0.256568	0.142633	0.0446606	0.0936452					18.961	18.5299	18.7455	19.0666	17.8693	18.468				18.8918	18.963	18.9274	19.4675	19.5363	19.5021	19.616	19.714	19.665					22_AcOH-Uracil_1.00_dimer.out	22_AcOH-Uracil_1.00.xyz	-643.167	-640.591	-642.999	-640.55
19.3605	22_AcOH-Uracil_1.05_dimer.out	0.728541	1.10318	0.915859	0.609005	1.65228	1.13064	0.806914	0.743165	0.775039	0.287619	0.228034	0.257637	0.14881	0.0623552	0.105556					18.632	18.2574	18.4447	18.7515	17.7083	18.2299				18.5536	18.6174	18.5855	19.0729	19.1325	19.1029	19.2117	19.2982	19.255					22_AcOH-Uracil_1.05_dimer.out	22_AcOH-Uracil_1.05.xyz	-643.166	-640.591	-642.998	-640.551
18.5649	22_AcOH-Uracil_1.10_dimer.out	0.652802	0.977982	0.815392	0.541168	1.45237	0.996769	0.725993	0.666958	0.696475	0.252852	0.199511	0.225988	0.125037	0.0481739	0.0865338					17.9121	17.5869	17.7495	18.0238	17.1125	17.5682				17.8389	17.898	17.8684	18.3121	18.3654	18.3389	18.4399	18.5167	18.4784					22_AcOH-Uracil_1.10_dimer.out	22_AcOH-Uracil_1.10.xyz	-643.165	-640.59	-642.997	-640.55
15.1977	22_AcOH-Uracil_1.25_dimer.out	0.506829	0.715598	0.611213	0.37643	0.987653	0.682042	0.592322	0.537229	0.564776	0.253869	0.207419	0.230456	0.165523	0.100123	0.132734					14.6909	14.4821	14.5865	14.8213	14.2101	14.5157				14.6054	14.6605	14.633	14.9439	14.9903	14.9673	15.0322	15.0976	15.065					22_AcOH-Uracil_1.25_dimer.out	22_AcOH-Uracil_1.25.xyz	-643.16	-640.587	-642.992	-640.547
9.86735	22_AcOH-Uracil_1.50_dimer.out	0.352442	0.463247	0.407845	0.262686	0.582998	0.422842	0.41129	0.384734	0.398012	0.176722	0.157793	0.167109	0.140996	0.11275	0.126739					9.5149	9.4041	9.4595	9.60466	9.28435	9.4445				9.45606	9.48261	9.46933	9.69062	9.70955	9.70024	9.72635	9.7546	9.74061					22_AcOH-Uracil_1.50_dimer.out	22_AcOH-Uracil_1.50.xyz	-643.151	-640.58	-642.984	-640.54
4.14991	22_AcOH-Uracil_2.00_dimer.out	0.127237	0.170012	0.148624	0.0667663	0.202951	0.134859	0.166884	0.148415	0.15765	0.0922491	0.0760055	0.0840823	0.0823058	0.0626504	0.0724467					4.02267	3.9799	4.00129	4.08315	3.94696	4.01505				3.98303	4.0015	3.99226	4.05766	4.07391	4.06583	4.06761	4.08726	4.07747					22_AcOH-Uracil_2.00_dimer.out	22_AcOH-Uracil_2.00.xyz	-643.143	-640.572	-642.975	-640.532
18.0758	23_AcNH2-Uracil_0.90_dimer.out	0.773157	1.2777	1.02543	0.70219	2.10759	1.40489	0.819686	0.733603	0.776644	0.274642	0.195412	0.234801	0.0929324	0.0166075	0.0381063					17.3027	16.7981	17.0504	17.3737	15.9683	16.671				17.2562	17.3422	17.2992	17.8012	17.8804	17.841	17.9829	18.0925	18.0377					23_AcNH2-Uracil_0.90_dimer.out	23_AcNH2-Uracil_0.90.xyz	-623.296	-620.742	-623.134	-620.703
19.1946	23_AcNH2-Uracil_0.95_dimer.out	0.731169	1.16272	0.946944	0.657661	1.88451	1.27109	0.779363	0.689485	0.734424	0.262328	0.177015	0.219478	0.0924406	0.0212765	0.0355559					18.4634	18.0319	18.2477	18.5369	17.3101	17.9235				18.4152	18.5051	18.4602	18.9323	19.0176	18.9751	19.1022	19.2159	19.159					23_AcNH2-Uracil_0.95_dimer.out	23_AcNH2-Uracil_0.95.xyz	-623.298	-620.745	-623.136	-620.706
19.4317	23_AcNH2-Uracil_1.00_dimer.out	0.699317	1.06896	0.88414	0.625422	1.68859	1.15701	0.747765	0.662716	0.705241	0.259735	0.180074	0.219711	0.107229	0.000369536	0.0534104					18.7323	18.3627	18.5475	18.8062	17.7431	18.2747				18.6839	18.7689	18.7264	19.1719	19.2516	19.2119	19.3244	19.432	19.3782					23_AcNH2-Uracil_1.00_dimer.out	23_AcNH2-Uracil_1.00.xyz	-623.298	-620.747	-623.136	-620.708
19.0856	23_AcNH2-Uracil_1.05_dimer.out	0.642112	0.963541	0.802827	0.561617	1.48421	1.02291	0.694888	0.622174	0.658531	0.247784	0.181351	0.214375	0.108791	0.0175771	0.0631319					18.4435	18.1221	18.2828	18.524	17.6014	18.0627				18.3907	18.4634	18.4271	18.8378	18.9042	18.8712	18.9768	19.068	19.0225					23_AcNH2-Uracil_1.05_dimer.out	23_AcNH2-Uracil_1.05.xyz	-623.298	-620.747	-623.136	-620.708
18.3674	23_AcNH2-Uracil_1.10_dimer.out	0.588811	0.867229	0.72802	0.499161	1.3002	0.899682	0.647588	0.583356	0.615472	0.242464	0.18371	0.212915	0.115091	0.0348813	0.0749257					17.7785	17.5001	17.6393	17.8682	17.0672	17.4677				17.7198	17.784	17.7519	18.1249	18.1836	18.1544	18.2523	18.3325	18.2924					23_AcNH2-Uracil_1.10_dimer.out	23_AcNH2-Uracil_1.10.xyz	-623.297	-620.747	-623.134	-620.708
15.2646	23_AcNH2-Uracil_1.25_dimer.out	0.458744	0.643106	0.550925	0.373855	0.896093	0.634974	0.5144	0.477239	0.495819	0.200907	0.177978	0.1892	0.113856	0.0767553	0.0950652					14.8058	14.6214	14.7136	14.8907	14.3685	14.6296				14.7502	14.7873	14.7687	15.0636	15.0866	15.0754	15.1507	15.1878	15.1695					23_AcNH2-Uracil_1.25_dimer.out	23_AcNH2-Uracil_1.25.xyz	-623.292	-620.744	-623.13	-620.705
10.2404	23_AcNH2-Uracil_1.50_dimer.out	0.314259	0.412454	0.363356	0.256607	0.533413	0.39501	0.352058	0.333149	0.342603	0.170917	0.162373	0.166481	0.133379	0.117238	0.125133					9.9261	9.8279	9.877	9.98375	9.70694	9.84535				9.8883	9.90721	9.89775	10.0694	10.078	10.0739	10.107	10.1231	10.1152					23_AcNH2-Uracil_1.50_dimer.out	23_AcNH2-Uracil_1.50.xyz	-623.284	-620.738	-623.122	-620.699
4.66191	23_AcNH2-Uracil_2.00_dimer.out	0.131657	0.165793	0.148725	0.0877241	0.203586	0.145655	0.16046	0.141015	0.150738	0.0794884	0.0671356	0.0732118	0.063055	0.045739	0.0543044					4.53026	4.49612	4.51319	4.57419	4.45833	4.51626				4.50145	4.5209	4.51118	4.58243	4.59478	4.5887	4.59886	4.61618	4.60761					23_AcNH2-Uracil_2.00_dimer.out	23_AcNH2-Uracil_2.00.xyz	-623.276	-620.73	-623.113	-620.691
-0.137809	24_Benzene-Benzene_pi-pi_0.90_dimer.out	1.3493	0.796906	1.0731	2.22191	0.479105	1.35051	0.777177	1.00527	0.891222	0.136274	0.0458	0.0897809	0.0321903	0.0329924	0.00254635					1.21149	0.659098	0.935292	2.08411	0.341297	1.2127				0.639368	0.867459	0.753413	-0.274083	-0.183609	-0.22759	-0.169999	-0.104816	-0.135262					24_Benzene-Benzene_pi-pi_0.90_dimer.out	24_Benzene-Benzene_pi-pi_0.90.xyz	-463.755	-461.568	-463.638	-461.542
1.79077	24_Benzene-Benzene_pi-pi_0.95_dimer.out	1.38551	0.938181	1.16185	2.13351	0.72475	1.42913	0.895106	1.07811	0.986609	0.0576314	0.019348	0.0371664	0.00706395	0.0170924	0.014339					3.17628	2.72895	2.95262	3.92427	2.51552	3.2199				2.68587	2.86888	2.77738	1.73314	1.77142	1.7536	1.79783	1.80786	1.80511					24_Benzene-Benzene_pi-pi_0.95_dimer.out	24_Benzene-Benzene_pi-pi_0.95.xyz	-463.758	-461.576	-463.64	-461.55
2.52128	24_Benzene-Benzene_pi-pi_1.00_dimer.out	1.2058	0.849362	1.02758	1.92091	0.763715	1.34231	0.73696	0.905515	0.821238	0.100116	0.0654339	0.0815388	0.0508494	0.0391089	0.0429193					3.72708	3.37064	3.54886	4.44219	3.285	3.86359				3.25824	3.4268	3.34252	2.42116	2.45585	2.43974	2.47043	2.48217	2.47836					24_Benzene-Benzene_pi-pi_1.00_dimer.out	24_Benzene-Benzene_pi-pi_1.00.xyz	-463.759	-461.581	-463.641	-461.554
2.63293	24_Benzene-Benzene_pi-pi_1.05_dimer.out	1.08323	0.793418	0.938324	1.64775	0.692849	1.1703	0.713113	0.859354	0.786234	0.0351097	0.0702091	0.0536905	0.0647625	0.0798172	0.0740194					3.71616	3.42634	3.57125	4.28067	3.32578	3.80322				3.34604	3.49228	3.41916	2.66804	2.70314	2.68662	2.69769	2.71274	2.70695					24_Benzene-Benzene_pi-pi_1.05_dimer.out	24_Benzene-Benzene_pi-pi_1.05.xyz	-463.759	-461.584	-463.641	-461.557
2.44969	24_Benzene-Benzene_pi-pi_1.10_dimer.out	0.873754	0.64293	0.758342	1.37362	0.554141	0.963881	0.546023	0.701143	0.623583	0.0695347	0.13882	0.104987	0.0925419	0.148772	0.121982					3.32344	3.09262	3.20803	3.82331	3.00383	3.41357				2.99571	3.15083	3.07327	2.51922	2.58851	2.55468	2.54223	2.59846	2.57167					24_Benzene-Benzene_pi-pi_1.10_dimer.out	24_Benzene-Benzene_pi-pi_1.10.xyz	-463.758	-461.585	-463.64	-461.559
1.47949	24_Benzene-Benzene_pi-pi_1.25_dimer.out	0.379072	0.257834	0.318453	0.71836	0.254337	0.486348	0.156623	0.260127	0.208375	0.0835156	0.12369	0.104277	0.104274	0.140313	0.123351					1.85856	1.73732	1.79794	2.19785	1.73382	1.96584				1.63611	1.73961	1.68786	1.563	1.60318	1.58376	1.58376	1.6198	1.60284					24_Benzene-Benzene_pi-pi_1.25_dimer.out	24_Benzene-Benzene_pi-pi_1.25.xyz	-463.756	-461.588	-463.638	-461.561
0.468184	24_Benzene-Benzene_pi-pi_1.50_dimer.out	0.137834	0.0923252	0.115079	0.248642	0.0891295	0.168886	0.0651838	0.0944205	0.0798021	0.198974	0.19274	0.196283	0.224585	0.219225	0.222559					0.606018	0.56051	0.583264	0.716827	0.557314	0.63707				0.533368	0.562605	0.547987	0.667158	0.660925	0.664467	0.692769	0.68741	0.690743					24_Benzene-Benzene_pi-pi_1.50_dimer.out	24_Benzene-Benzene_pi-pi_1.50.xyz	-463.754	-461.588	-463.635	-461.562
0.0586454	24_Benzene-Benzene_pi-pi_2.00_dimer.out	0.0254434	0.0198324	0.0226379	0.0633159	0.0189255	0.0411207	0.000612914	0.020427	0.01052	0.0235452	0.0339677	0.0288658	0.03134	0.0409297	0.0363183					0.0840888	0.0784778	0.0812833	0.121961	0.0775709	0.0997661				0.0592583	0.0790723	0.0691653	0.0821906	0.092613	0.0875111	0.0899854	0.099575	0.0949636					24_Benzene-Benzene_pi-pi_2.00_dimer.out	24_Benzene-Benzene_pi-pi_2.00.xyz	-463.753	-461.589	-463.634	-461.562
0.964221	25_Pyridine-Pyridine_pi-pi_0.90_dimer.out	1.18931	0.62675	0.908031	2.0433	0.266904	1.1551	0.629409	0.862678	0.746044	0.207222	0.0727828	0.13915	0.0896633	0.0481068	0.019667					2.15353	1.59097	1.87225	3.00752	1.23113	2.11932				1.59363	1.8269	1.71027	0.757	0.891439	0.825071	0.874558	1.01233	0.944554					25_Pyridine-Pyridine_pi-pi_0.90_dimer.out	25_Pyridine-Pyridine_pi-pi_0.90.xyz	-495.819	-493.566	-495.696	-493.538
2.89122	25_Pyridine-Pyridine_pi-pi_0.95_dimer.out	1.27939	0.81404	1.04671	2.06061	0.62129	1.34095	0.76719	0.940414	0.853802	0.188673	0.131623	0.159138	0.11437	0.0627029	0.087102					4.17061	3.70526	3.93794	4.95183	3.51251	4.23217				3.65841	3.83164	3.74503	2.70255	2.7596	2.73209	2.77685	2.82852	2.80412					25_Pyridine-Pyridine_pi-pi_0.95_dimer.out	25_Pyridine-Pyridine_pi-pi_0.95.xyz	-495.823	-493.574	-495.699	-493.546
3.61049	25_Pyridine-Pyridine_pi-pi_1.00_dimer.out	1.30782	0.93055	1.11919	1.92867	0.743212	1.33594	0.90077	1.05338	0.977072	0.0250011	0.0116783	0.00564649	0.0186987	0.0466098	0.0341392					4.91831	4.54104	4.72967	5.53916	4.3537	4.94643				4.51125	4.66386	4.58756	3.58548	3.62216	3.60484	3.62918	3.65709	3.64462					25_Pyridine-Pyridine_pi-pi_1.00_dimer.out	25_Pyridine-Pyridine_pi-pi_1.00.xyz	-495.824	-493.579	-495.7	-493.55
3.68858	25_Pyridine-Pyridine_pi-pi_1.05_dimer.out	1.08423	0.776529	0.930379	1.62163	0.640814	1.13122	0.731894	0.865508	0.798701	0.0119971	0.0355991	0.0248052	0.0408975	0.0533461	0.0486642					4.77281	4.46511	4.61896	5.3102	4.32939	4.8198				4.42047	4.55409	4.48728	3.70057	3.72418	3.71338	3.72947	3.74192	3.73724					25_Pyridine-Pyridine_pi-pi_1.05_dimer.out	25_Pyridine-Pyridine_pi-pi_1.05.xyz	-495.824	-493.581	-495.699	-493.553
3.45182	25_Pyridine-Pyridine_pi-pi_1.10_dimer.out	0.885262	0.637154	0.761208	1.35845	0.539261	0.948854	0.575026	0.701335	0.638181	0.0386985	0.0714363	0.055945	0.0605304	0.0839629	0.0735994					4.33708	4.08897	4.21302	4.81026	3.99108	4.40067				4.02684	4.15315	4.09	3.49051	3.52325	3.50776	3.51235	3.53578	3.52542					25_Pyridine-Pyridine_pi-pi_1.10_dimer.out	25_Pyridine-Pyridine_pi-pi_1.10.xyz	-495.823	-493.583	-495.699	-493.555
2.29922	25_Pyridine-Pyridine_pi-pi_1.25_dimer.out	0.420973	0.280301	0.350637	0.759547	0.27961	0.519579	0.198993	0.280754	0.239873	0.0795282	0.106141	0.0934062	0.100415	0.126664	0.114376					2.72019	2.57952	2.64986	3.05877	2.57883	2.8188				2.49821	2.57997	2.53909	2.37875	2.40536	2.39263	2.39963	2.42588	2.4136					25_Pyridine-Pyridine_pi-pi_1.25_dimer.out	25_Pyridine-Pyridine_pi-pi_1.25.xyz	-495.82	-493.585	-495.696	-493.557
0.945317	25_Pyridine-Pyridine_pi-pi_1.50_dimer.out	0.154568	0.0964486	0.125508	0.278298	0.0975684	0.187933	0.0734458	0.0957144	0.0845801	0.174634	0.172118	0.173675	0.199273	0.201178	0.200629					1.09988	1.04177	1.07082	1.22361	1.04288	1.13325				1.01876	1.04103	1.0299	1.11995	1.11743	1.11899	1.14459	1.14649	1.14595					25_Pyridine-Pyridine_pi-pi_1.50_dimer.out	25_Pyridine-Pyridine_pi-pi_1.50.xyz	-495.818	-493.586	-495.693	-493.558
0.233435	25_Pyridine-Pyridine_pi-pi_2.00_dimer.out	0.034791	0.0240067	0.0293989	0.0696588	0.0211265	0.0453927	0.0119305	0.025895	0.0189128	0.0342287	0.0435253	0.0389343	0.0413388	0.0528432	0.0471483					0.268226	0.257442	0.262834	0.303094	0.254562	0.278828				0.245366	0.25933	0.252348	0.267664	0.27696	0.272369	0.274774	0.286278	0.280583					25_Pyridine-Pyridine_pi-pi_2.00_dimer.out	25_Pyridine-Pyridine_pi-pi_2.00.xyz	-495.816	-493.586	-495.691	-493.557
7.5928	26_Uracil-Uracil_pi-pi_0.90_dimer.out	1.20286	0.156909	0.679884	2.5395	0.358623	1.09044	0.326513	0.494909	0.410711	0.482873	0.456429	0.468318	0.1694	0.141741	0.153595					8.79566	7.74971	8.27268	10.1323	7.23417	8.68324				7.91931	8.08771	8.00351	7.10992	7.13637	7.12448	7.4234	7.45106	7.4392					26_Uracil-Uracil_pi-pi_0.90_dimer.out	26_Uracil-Uracil_pi-pi_0.90.xyz	-828.632	-825.287	-828.42	-825.236
9.26565	26_Uracil-Uracil_pi-pi_0.95_dimer.out	1.06835	0.169177	0.618764	2.23525	0.221762	1.00675	0.303289	0.425491	0.36439	0.267375	0.30188	0.283067	0.00242205	0.0408517	0.019227					10.334	9.43483	9.88441	11.5009	9.04389	10.2724				9.56894	9.69114	9.63004	8.99827	8.96377	8.98258	9.26323	9.2248	9.24642					26_Uracil-Uracil_pi-pi_0.95_dimer.out	26_Uracil-Uracil_pi-pi_0.95.xyz	-828.634	-825.294	-828.422	-825.244
9.61943	26_Uracil-Uracil_pi-pi_1.00_dimer.out	0.986874	0.216867	0.60187	2.03031	0.0691146	0.980599	0.30276	0.404366	0.353563	0.204728	0.25436	0.228026	0.0103818	0.0461397	0.0155016					10.6063	9.8363	10.2213	11.6497	9.55032	10.6				9.92219	10.0238	9.97299	9.4147	9.36507	9.3914	9.62981	9.57329	9.60393					26_Uracil-Uracil_pi-pi_1.00_dimer.out	26_Uracil-Uracil_pi-pi_1.00.xyz	-828.635	-825.299	-828.423	-825.248
9.25628	26_Uracil-Uracil_pi-pi_1.05_dimer.out	0.842969	0.188183	0.515576	1.77862	0.011967	0.883324	0.229528	0.319408	0.274468	0.14862	0.209355	0.17744	0.0245207	0.0426944	0.00667381					10.0992	9.44446	9.77185	11.0349	9.24431	10.1396				9.48581	9.57569	9.53075	9.10766	9.04692	9.07884	9.2808	9.21358	9.24961					26_Uracil-Uracil_pi-pi_1.05_dimer.out	26_Uracil-Uracil_pi-pi_1.05.xyz	-828.634	-825.301	-828.422	-825.25
8.54106	26_Uracil-Uracil_pi-pi_1.10_dimer.out	0.536265	0.019966	0.258149	1.38531	0.155973	0.614671	0.0204021	0.0692049	0.0244014	0.149224	0.19165	0.169025	0.00605102	0.0482864	0.0250321					9.07733	8.52109	8.79921	9.92638	8.38509	9.15573				8.52066	8.61027	8.56546	8.39184	8.34941	8.37204	8.53501	8.49277	8.51603					26_Uracil-Uracil_pi-pi_1.10_dimer.out	26_Uracil-Uracil_pi-pi_1.10.xyz	-828.632	-825.302	-828.42	-825.252
5.99344	26_Uracil-Uracil_pi-pi_1.25_dimer.out	0.201841	0.141133	0.0303539	0.809644	0.166541	0.321551	0.196656	0.124474	0.160565	0.0475738	0.0141917	0.0321079	0.155639	0.134311	0.146695					6.19528	5.85231	6.02379	6.80308	5.8269	6.31499				5.79678	5.86896	5.83287	6.04101	6.00763	6.02555	6.14908	6.12775	6.14013					26_Uracil-Uracil_pi-pi_1.25_dimer.out	26_Uracil-Uracil_pi-pi_1.25.xyz	-828.628	-825.303	-828.415	-825.252
3.07071	26_Uracil-Uracil_pi-pi_1.50_dimer.out	0.0905684	0.068515	0.0110267	0.365676	0.0730786	0.146299	0.0898015	0.065523	0.0776622	0.171604	0.120866	0.14713	0.236646	0.204073	0.221472					3.16128	3.00219	3.08174	3.43639	2.99763	3.21701				2.98091	3.00519	2.99305	3.24231	3.19158	3.21784	3.30736	3.27478	3.29218					26_Uracil-Uracil_pi-pi_1.50_dimer.out	26_Uracil-Uracil_pi-pi_1.50.xyz	-828.623	-825.302	-828.41	-825.251
0.986244	26_Uracil-Uracil_pi-pi_2.00_dimer.out	0.0295235	0.0187518	0.00538581	0.0910203	0.0210558	0.0349822	0.010796	0.0172413	0.0140186	0.0523388	0.0225759	0.0377305	0.0645637	0.051447	0.0581581					1.01577	0.967493	0.99163	1.07726	0.965189	1.02123				0.975449	0.969003	0.972226	1.03858	1.00882	1.02398	1.05081	1.03769	1.0444					26_Uracil-Uracil_pi-pi_2.00_dimer.out	26_Uracil-Uracil_pi-pi_2.00.xyz	-828.62	-825.3	-828.406	-825.249
0.362257	27_Benzene-Pyridine_pi-pi_0.90_dimer.out	1.227	0.660189	0.943597	2.20562	0.421896	1.31376	0.585393	0.816423	0.700908	0.32468	0.226709	0.274488	0.202942	0.118108	0.158637					1.58926	1.02245	1.30585	2.56787	0.784153	1.67601				0.94765	1.17868	1.06317	0.0375769	0.135548	0.0877697	0.159315	0.24415	0.20362					27_Benzene-Pyridine_pi-pi_0.90_dimer.out	27_Benzene-Pyridine_pi-pi_0.90.xyz	-479.787	-477.566	-479.667	-477.539
2.41302	27_Benzene-Pyridine_pi-pi_0.95_dimer.out	1.30876	0.850814	1.07979	2.07747	0.629952	1.35371	0.804768	0.995619	0.900193	0.112074	0.0520584	0.0808855	0.0328928	0.0075005	0.0107687					3.72178	3.26383	3.49281	4.49049	3.04297	3.76673				3.21779	3.40864	3.31321	2.30095	2.36096	2.33213	2.38013	2.42052	2.40225					27_Benzene-Pyridine_pi-pi_0.95_dimer.out	27_Benzene-Pyridine_pi-pi_0.95.xyz	-479.79	-477.575	-479.67	-477.548
3.15603	27_Benzene-Pyridine_pi-pi_1.00_dimer.out	1.25713	0.889026	1.07308	1.91491	0.73069	1.3228	0.825862	0.992836	0.909349	0.0410837	1.8193e-05	0.0193925	0.0100936	0.0337686	0.0237561					4.41316	4.04506	4.22911	5.07094	3.88672	4.47883				3.9819	4.14887	4.06538	3.11495	3.15605	3.13664	3.16613	3.1898	3.17979					27_Benzene-Pyridine_pi-pi_1.00_dimer.out	27_Benzene-Pyridine_pi-pi_1.00.xyz	-479.791	-477.58	-479.671	-477.553
3.23443	27_Benzene-Pyridine_pi-pi_1.05_dimer.out	1.05873	0.764238	0.911485	1.61955	0.634786	1.12717	0.691039	0.849111	0.770075	0.0315144	0.0801993	0.0568738	0.0689522	0.100968	0.0866224					4.29316	3.99867	4.14591	4.85398	3.86921	4.3616				3.92547	4.08354	4.0045	3.26594	3.31463	3.2913	3.30338	3.3354	3.32105					27_Benzene-Pyridine_pi-pi_1.05_dimer.out	27_Benzene-Pyridine_pi-pi_1.05.xyz	-479.791	-477.583	-479.67	-477.556
3.00145	27_Benzene-Pyridine_pi-pi_1.10_dimer.out	0.887699	0.649579	0.768639	1.36347	0.543657	0.953565	0.575766	0.719025	0.647395	0.0875529	0.14047	0.114867	0.116477	0.157252	0.138244					3.88915	3.65103	3.77009	4.36492	3.54511	3.95501				3.57721	3.72047	3.64884	3.089	3.14192	3.11632	3.11793	3.1587	3.13969					27_Benzene-Pyridine_pi-pi_1.10_dimer.out	27_Benzene-Pyridine_pi-pi_1.10.xyz	-479.79	-477.584	-479.67	-477.557
1.91291	27_Benzene-Pyridine_pi-pi_1.25_dimer.out	0.396133	0.263804	0.329968	0.706972	0.235158	0.471065	0.192336	0.282585	0.23746	0.123717	0.156476	0.140708	0.149187	0.180532	0.165784					2.30904	2.17671	2.24287	2.61988	2.14806	2.38397				2.10524	2.19549	2.15037	2.03662	2.06938	2.05361	2.06209	2.09344	2.07869					27_Benzene-Pyridine_pi-pi_1.25_dimer.out	27_Benzene-Pyridine_pi-pi_1.25.xyz	-479.788	-477.587	-479.667	-477.559
0.705302	27_Benzene-Pyridine_pi-pi_1.50_dimer.out	0.144447	0.0915209	0.117984	0.261416	0.0890911	0.175254	0.0677578	0.093114	0.0804359	0.197859	0.1955	0.197019	0.225203	0.224098	0.225172					0.849749	0.796823	0.823286	0.966718	0.794393	0.880555				0.77306	0.798416	0.785738	0.90316	0.900802	0.902321	0.930504	0.9294	0.930473					27_Benzene-Pyridine_pi-pi_1.50_dimer.out	27_Benzene-Pyridine_pi-pi_1.50.xyz	-479.786	-477.587	-479.664	-477.56
0.143097	27_Benzene-Pyridine_pi-pi_2.00_dimer.out	0.02864	0.0190772	0.0238586	0.0639344	0.0178968	0.0409156	0.00549968	0.019851	0.0126754	0.027653	0.0352991	0.0315557	0.0376499	0.0455756	0.0417357					0.171737	0.162174	0.166956	0.207032	0.160994	0.184013				0.148597	0.162948	0.155773	0.17075	0.178396	0.174653	0.180747	0.188673	0.184833					27_Benzene-Pyridine_pi-pi_2.00_dimer.out	27_Benzene-Pyridine_pi-pi_2.00.xyz	-479.785	-477.587	-479.663	-477.56
3.17801	28_Benzene-Uracil_pi-pi_0.90_dimer.out	1.32978	0.529973	0.929875	2.54	0.163233	1.35162	0.536314	0.770421	0.653368	0.326352	0.254291	0.288783	0.0990615	0.0446028	0.0693126					4.50778	3.70798	4.10788	5.718	3.34124	4.52962				3.71432	3.94843	3.83137	2.85165	2.92371	2.88922	3.07894	3.1334	3.10869					28_Benzene-Uracil_pi-pi_0.90_dimer.out	28_Benzene-Uracil_pi-pi_0.90.xyz	-646.193	-643.426	-646.029	-643.388
4.92446	28_Benzene-Uracil_pi-pi_0.95_dimer.out	1.30219	0.634485	0.968337	2.4227	0.431613	1.42715	0.567548	0.767494	0.667521	0.321214	0.27595	0.297132	0.139669	0.112407	0.123674					6.22665	5.55894	5.89279	7.34715	5.35607	6.35161				5.492	5.69195	5.59198	4.60324	4.6485	4.62732	4.78479	4.81205	4.80078					28_Benzene-Uracil_pi-pi_0.95_dimer.out	28_Benzene-Uracil_pi-pi_0.95.xyz	-646.196	-643.434	-646.031	-643.395
5.46473	28_Benzene-Uracil_pi-pi_1.00_dimer.out	1.24282	0.684286	0.963554	2.20202	0.521115	1.36157	0.613936	0.791267	0.702602	0.182182	0.150976	0.165197	0.0435582	0.0302257	0.0346382					6.70756	6.14902	6.42829	7.66676	5.98585	6.8263				6.07867	6.256	6.16734	5.28255	5.31376	5.29954	5.42118	5.43451	5.4301					28_Benzene-Uracil_pi-pi_1.00_dimer.out	28_Benzene-Uracil_pi-pi_1.00.xyz	-646.196	-643.439	-646.032	-643.4
5.35136	28_Benzene-Uracil_pi-pi_1.05_dimer.out	1.07098	0.600685	0.835833	1.90036	0.477733	1.18905	0.527213	0.681296	0.604254	0.106978	0.0779649	0.0912755	0.00237914	0.0142286	0.00782689					6.42234	5.95204	6.18719	7.25171	5.82909	6.5404				5.87857	6.03265	5.95561	5.24438	5.27339	5.26008	5.34898	5.36558	5.35918					28_Benzene-Uracil_pi-pi_1.05_dimer.out	28_Benzene-Uracil_pi-pi_1.05.xyz	-646.196	-643.441	-646.031	-643.403
4.91567	28_Benzene-Uracil_pi-pi_1.10_dimer.out	0.894469	0.499433	0.696951	1.60384	0.397135	1.00049	0.429379	0.566504	0.497941	0.0417935	0.0194667	0.0295017	0.0408654	0.0511433	0.0478194					5.81014	5.41511	5.61262	6.51952	5.31281	5.91616				5.34505	5.48218	5.41361	4.87388	4.89621	4.88617	4.95654	4.96682	4.96349					28_Benzene-Uracil_pi-pi_1.10_dimer.out	28_Benzene-Uracil_pi-pi_1.10.xyz	-646.195	-643.443	-646.03	-643.405
3.20726	28_Benzene-Uracil_pi-pi_1.25_dimer.out	0.404116	0.181248	0.292682	0.894279	0.143808	0.519043	0.0827492	0.205796	0.144273	0.0730906	0.120724	0.0977317	0.126904	0.172388	0.150924					3.61138	3.38851	3.49995	4.10154	3.35107	3.72631				3.29001	3.41306	3.35154	3.28035	3.32799	3.305	3.33417	3.37965	3.35819					28_Benzene-Uracil_pi-pi_1.25_dimer.out	28_Benzene-Uracil_pi-pi_1.25.xyz	-646.191	-643.445	-646.026	-643.406
1.33389	28_Benzene-Uracil_pi-pi_1.50_dimer.out	0.150726	0.0562078	0.103467	0.365795	0.0505109	0.208153	0.00971939	0.0599429	0.0348311	0.208114	0.203823	0.206621	0.251088	0.249804	0.251422					1.48462	1.3901	1.43736	1.69969	1.3844	1.54205				1.34361	1.39384	1.36872	1.54201	1.53772	1.54051	1.58498	1.5837	1.58531					28_Benzene-Uracil_pi-pi_1.50_dimer.out	28_Benzene-Uracil_pi-pi_1.50.xyz	-646.188	-643.445	-646.022	-643.406
0.245855	28_Benzene-Uracil_pi-pi_2.00_dimer.out	0.0307319	0.015208	0.0229699	0.0762939	0.014981	0.0456374	0.000859927	0.0153568	0.00810836	0.0474741	0.0449226	0.0463982	0.0630274	0.0597559	0.0617156					0.276587	0.261063	0.268825	0.322149	0.260836	0.291493				0.246715	0.261212	0.253964	0.293329	0.290778	0.292254	0.308883	0.305611	0.307571					28_Benzene-Uracil_pi-pi_2.00_dimer.out	28_Benzene-Uracil_pi-pi_2.00.xyz	-646.186	-643.444	-646.02	-643.406
3.37441	29_Pyridine-Uracil_pi-pi_0.90_dimer.out	1.16419	0.327813	0.745999	2.42495	0.0511121	1.18692	0.337586	0.576249	0.456917	0.5105	0.410157	0.459047	0.267834	0.169874	0.216945					4.5386	3.70222	4.12041	5.79936	3.3233	4.56133				3.712	3.95066	3.83133	2.86391	2.96425	2.91536	3.10658	3.20454	3.15747					29_Pyridine-Uracil_pi-pi_0.90_dimer.out	29_Pyridine-Uracil_pi-pi_0.90.xyz	-662.225	-659.423	-662.057	-659.384
5.87827	29_Pyridine-Uracil_pi-pi_0.95_dimer.out	1.23652	0.554316	0.895419	2.26308	0.243779	1.25343	0.563474	0.757915	0.660694	0.249544	0.188422	0.217746	0.0562257	0.000595673	0.0265409					7.11479	6.43259	6.77369	8.14135	6.12205	7.1317				6.44174	6.63618	6.53896	5.62873	5.68985	5.66052	5.82204	5.87767	5.85173					29_Pyridine-Uracil_pi-pi_0.95_dimer.out	29_Pyridine-Uracil_pi-pi_0.95.xyz	-662.229	-659.433	-662.061	-659.394
6.5763	29_Pyridine-Uracil_pi-pi_1.00_dimer.out	1.15152	0.594764	0.873144	2.0887	0.425565	1.25713	0.537083	0.705696	0.62139	0.255745	0.213795	0.233601	0.115176	0.0805903	0.0961102					7.72782	7.17106	7.44944	8.66499	7.00186	7.83343				7.11338	7.28199	7.19769	6.32055	6.3625	6.3427	6.46112	6.49571	6.48019					29_Pyridine-Uracil_pi-pi_1.00_dimer.out	29_Pyridine-Uracil_pi-pi_1.00.xyz	-662.23	-659.439	-662.062	-659.4
6.39132	29_Pyridine-Uracil_pi-pi_1.05_dimer.out	0.923394	0.472096	0.697745	1.74854	0.381631	1.06508	0.382401	0.531408	0.456905	0.207828	0.178117	0.191828	0.111152	0.0866177	0.097171					7.31471	6.86342	7.08907	8.13986	6.77295	7.4564				6.77372	6.92273	6.84823	6.18349	6.2132	6.19949	6.28017	6.3047	6.29415					29_Pyridine-Uracil_pi-pi_1.05_dimer.out	29_Pyridine-Uracil_pi-pi_1.05.xyz	-662.229	-659.442	-662.061	-659.403
5.82038	29_Pyridine-Uracil_pi-pi_1.10_dimer.out	0.735142	0.366278	0.55071	1.40039	0.256089	0.828238	0.298985	0.438522	0.368754	0.0565108	0.0188695	0.0366712	0.0307127	0.0691008	0.0513789					6.55552	6.18666	6.37109	7.22076	6.07647	6.64862				6.11936	6.2589	6.18913	5.76387	5.80151	5.78371	5.85109	5.88948	5.87176					29_Pyridine-Uracil_pi-pi_1.10_dimer.out	29_Pyridine-Uracil_pi-pi_1.10.xyz	-662.228	-659.444	-662.059	-659.404
3.79308	29_Pyridine-Uracil_pi-pi_1.25_dimer.out	0.28929	0.0902423	0.189766	0.684346	0.0136022	0.348974	0.0302771	0.14049	0.0853837	0.145095	0.192268	0.169405	0.202817	0.258775	0.231775					4.08237	3.88332	3.98285	4.47743	3.80668	4.14206				3.82336	3.93357	3.87846	3.93818	3.98535	3.96249	3.9959	4.05186	4.02486					29_Pyridine-Uracil_pi-pi_1.25_dimer.out	29_Pyridine-Uracil_pi-pi_1.25.xyz	-662.224	-659.445	-662.055	-659.405
1.75215	29_Pyridine-Uracil_pi-pi_1.50_dimer.out	0.113832	0.0377811	0.0758067	0.298799	0.031776	0.165288	0.00743846	0.0417183	0.0171399	0.179156	0.190338	0.185215	0.214254	0.231809	0.223674					1.86598	1.78993	1.82795	2.05095	1.78392	1.91743				1.74471	1.79387	1.76929	1.9313	1.94249	1.93736	1.9664	1.98396	1.97582					29_Pyridine-Uracil_pi-pi_1.50_dimer.out	29_Pyridine-Uracil_pi-pi_1.50.xyz	-662.22	-659.444	-662.051	-659.405
0.528589	29_Pyridine-Uracil_pi-pi_2.00_dimer.out	0.0141992	0.000694767	0.00675222	0.0748899	0.00015915	0.0375245	0.0255917	0.00125462	0.0134232	0.00796733	0.0211523	0.0146914	0.0178535	0.0308914	0.0245808					0.542788	0.527894	0.535341	0.603479	0.528748	0.566113				0.502997	0.527334	0.515166	0.536556	0.549741	0.54328	0.546442	0.55948	0.55317					29_Pyridine-Uracil_pi-pi_2.00_dimer.out	29_Pyridine-Uracil_pi-pi_2.00.xyz	-662.218	-659.443	-662.049	-659.404
0.021002	30_Benzene-Ethene_0.90_dimer.out	0.472576	0.17997	0.326273	0.874475	0.0321079	0.421184	0.209077	0.319015	0.264046	0.0970165	0.0252054	0.0607776	0.0446973	0.0251077	0.00929887					0.493578	0.200972	0.347275	0.895477	-0.0111059	0.442186				0.230079	0.340017	0.285048	-0.0760145	-0.00420339	-0.0397756	-0.0236953	0.0461096	0.0117031					30_Benzene-Ethene_0.90_dimer.out	30_Benzene-Ethene_0.90.xyz	-310.34	-308.852	-310.261	-308.834
0.939473	30_Benzene-Ethene_0.95_dimer.out	0.615154	0.378285	0.49672	0.965908	0.223899	0.594903	0.385188	0.479506	0.432347	0.0503155	0.00411073	0.0227855	0.0204194	0.0326535	0.00654016					1.55463	1.31776	1.43619	1.90538	1.16337	1.53438				1.32466	1.41898	1.37182	0.889157	0.943584	0.916687	0.919053	0.972126	0.946013					30_Benzene-Ethene_0.95_dimer.out	30_Benzene-Ethene_0.95.xyz	-310.342	-308.856	-310.263	-308.838
1.26853	30_Benzene-Ethene_1.00_dimer.out	0.64171	0.44892	0.545315	0.96035	0.345542	0.652946	0.432798	0.516698	0.474748	0.0343244	0.00987378	0.0119192	0.0184084	0.0222006	0.00232492					1.91024	1.71745	1.81384	2.22888	1.61407	1.92147				1.70132	1.78522	1.74327	1.2342	1.2784	1.25661	1.25012	1.29073	1.27085					30_Benzene-Ethene_1.00_dimer.out	30_Benzene-Ethene_1.00.xyz	-310.343	-308.859	-310.263	-308.841
1.29209	30_Benzene-Ethene_1.05_dimer.out	0.502485	0.343878	0.423181	0.778036	0.265461	0.521749	0.321824	0.395291	0.358557	0.0136739	0.0281776	0.00750564	0.00417574	0.0358747	0.0161938					1.79458	1.63597	1.71527	2.07013	1.55755	1.81384				1.61392	1.68738	1.65065	1.27842	1.32027	1.2996	1.28792	1.32797	1.30829					30_Benzene-Ethene_1.05_dimer.out	30_Benzene-Ethene_1.05.xyz	-310.342	-308.86	-310.263	-308.842
1.17227	30_Benzene-Ethene_1.10_dimer.out	0.395368	0.264918	0.330143	0.636287	0.220534	0.42841	0.237413	0.294017	0.265715	0.012652	0.0111922	0.000439906	0.00644261	0.0154711	0.00492831					1.56763	1.43718	1.50241	1.80855	1.3928	1.60068				1.40968	1.46628	1.43798	1.15961	1.18346	1.17183	1.16582	1.18774	1.1772					30_Benzene-Ethene_1.10_dimer.out	30_Benzene-Ethene_1.10.xyz	-310.342	-308.861	-310.262	-308.843
0.650899	30_Benzene-Ethene_1.25_dimer.out	0.168074	0.0998498	0.133962	0.291871	0.0798555	0.185863	0.0869087	0.112959	0.0999337	0.0473753	0.0549012	0.0513304	0.0506735	0.0597489	0.0554635					0.818973	0.750749	0.784861	0.94277	0.730754	0.836762				0.737808	0.763858	0.750833	0.698274	0.7058	0.702229	0.701572	0.710648	0.706362					30_Benzene-Ethene_1.25_dimer.out	30_Benzene-Ethene_1.25.xyz	-310.341	-308.863	-310.261	-308.845
0.159214	30_Benzene-Ethene_1.50_dimer.out	0.0639945	0.0443331	0.0541638	0.106587	0.0299829	0.0682851	0.0360692	0.0537416	0.0449054	0.0973308	0.105632	0.101601	0.104462	0.115062	0.109917					0.223209	0.203547	0.213378	0.265801	0.189197	0.227499				0.195283	0.212956	0.20412	0.256545	0.264847	0.260815	0.263676	0.274277	0.269131					30_Benzene-Ethene_1.50_dimer.out	30_Benzene-Ethene_1.50.xyz	-310.34	-308.863	-310.26	-308.845
-0.0132824	30_Benzene-Ethene_2.00_dimer.out	0.0141658	0.0117588	0.0129623	0.0326679	0.0107497	0.0217088	0.00203513	0.0124204	0.00722777	0.0133034	0.0224149	0.0178762	0.0180813	0.0278308	0.0229759					0.000883347	-0.00152362	-0.000320134	0.0193855	-0.00253272	0.00842639				-0.0112473	-0.000862011	-0.00605465	2.09279e-05	0.00913251	0.00459381	0.00479888	0.0145484	0.00969351					30_Benzene-Ethene_2.00_dimer.out	30_Benzene-Ethene_2.00.xyz	-310.34	-308.864	-310.26	-308.846
2.39596	31_Uracil-Ethene_0.90_dimer.out	0.477932	0.0880109	0.282971	0.954917	0.122462	0.416228	0.165204	0.226004	0.195604	0.154344	0.134835	0.144225	0.0660121	0.0430104	0.0540395					2.8739	2.48398	2.67894	3.35088	2.2735	2.81219				2.56117	2.62197	2.59157	2.24162	2.26113	2.25174	2.32995	2.35295	2.34192					31_Uracil-Ethene_0.90_dimer.out	31_Uracil-Ethene_0.90.xyz	-492.777	-490.712	-492.65	-490.682
3.09153	31_Uracil-Ethene_0.95_dimer.out	0.502417	0.178412	0.340415	0.9354	0.0257803	0.48059	0.218539	0.278483	0.248511	0.129308	0.108689	0.118664	0.0572869	0.0353956	0.0458921					3.59395	3.26994	3.43194	4.02693	3.11731	3.57212				3.31007	3.37001	3.34004	2.96222	2.98284	2.97286	3.03424	3.05613	3.04564					31_Uracil-Ethene_0.95_dimer.out	31_Uracil-Ethene_0.95.xyz	-492.778	-490.715	-492.651	-490.685
3.25698	31_Uracil-Ethene_1.00_dimer.out	0.434771	0.162805	0.298788	0.787701	0.0221996	0.40495	0.203378	0.254991	0.229184	0.0633486	0.044066	0.0534266	0.00647212	0.0154181	0.00482722					3.69175	3.41978	3.55576	4.04468	3.27918	3.66193				3.46035	3.51197	3.48616	3.19363	3.21291	3.20355	3.2505	3.27239	3.2618					31_Uracil-Ethene_1.00_dimer.out	31_Uracil-Ethene_1.00.xyz	-492.779	-490.717	-492.651	-490.687
3.13698	31_Uracil-Ethene_1.05_dimer.out	0.398346	0.166363	0.282354	0.713648	0.0694418	0.391545	0.191622	0.229908	0.210765	0.0443137	0.036266	0.0400236	0.00280208	0.0131049	0.00829219					3.53532	3.30334	3.41933	3.85062	3.20642	3.52852				3.3286	3.36688	3.34774	3.09266	3.10071	3.09695	3.13978	3.15008	3.14527					31_Uracil-Ethene_1.05_dimer.out	31_Uracil-Ethene_1.05.xyz	-492.778	-490.719	-492.651	-490.689
2.87826	31_Uracil-Ethene_1.10_dimer.out	0.334712	0.139643	0.237178	0.602311	0.0575368	0.329924	0.159265	0.193475	0.17637	0.0164599	0.00983729	0.0128947	0.0195436	0.0273727	0.0238004					3.21297	3.0179	3.11544	3.48057	2.9358	3.20819				3.03753	3.07174	3.05463	2.8618	2.86842	2.86537	2.89781	2.90563	2.90206					31_Uracil-Ethene_1.10_dimer.out	31_Uracil-Ethene_1.10.xyz	-492.778	-490.72	-492.651	-490.689
1.94883	31_Uracil-Ethene_1.25_dimer.out	0.111238	0.00634841	0.0524447	0.284049	0.0412893	0.12138	0.0020628	0.0165601	0.00724863	0.0352068	0.0280771	0.0319346	0.0550854	0.0509033	0.0533966					2.06007	1.94248	2.00128	2.23288	1.90754	2.07021				1.94677	1.96539	1.95608	1.98404	1.97691	1.98077	2.00392	1.99974	2.00223					31_Uracil-Ethene_1.25_dimer.out	31_Uracil-Ethene_1.25.xyz	-492.776	-490.72	-492.649	-490.69
0.917883	31_Uracil-Ethene_1.50_dimer.out	0.0462143	0.00975789	0.0182282	0.112744	0.0175302	0.0476067	0.00259528	0.00466207	0.00103339	0.0888498	0.0633128	0.0763056	0.103318	0.0792449	0.0916133					0.964097	0.908125	0.936111	1.03063	0.900353	0.96549				0.920478	0.913221	0.91685	1.00673	0.981196	0.994188	1.0212	0.997128	1.0095					31_Uracil-Ethene_1.50_dimer.out	31_Uracil-Ethene_1.50.xyz	-492.774	-490.72	-492.647	-490.69
0.250618	31_Uracil-Ethene_2.00_dimer.out	0.00579652	0.000268212	0.00303237	0.0338475	0.000977268	0.0174124	0.0125947	0.000196669	0.00639568	0.00765199	0.0148704	0.0113236	0.0143435	0.0212036	0.017879					0.256414	0.250886	0.25365	0.284465	0.251595	0.26803				0.238023	0.250421	0.244222	0.25827	0.265488	0.261941	0.264961	0.271821	0.268497					31_Uracil-Ethene_2.00_dimer.out	31_Uracil-Ethene_2.00.xyz	-492.773	-490.72	-492.645	-490.689
2.58661	32_Uracil-Ethyne_0.90_dimer.out	0.477124	0.128498	0.302811	0.926917	0.0971699	0.414874	0.182225	0.276454	0.229339	0.11449	0.0560562	0.084963	0.0190964	0.0377087	0.00978978					3.06374	2.71511	2.88942	3.51353	2.48944	3.00148				2.76884	2.86306	2.81595	2.47212	2.53055	2.50165	2.56751	2.62432	2.5964					32_Uracil-Ethyne_0.90_dimer.out	32_Uracil-Ethyne_0.90.xyz	-491.525	-489.497	-491.4	-489.467
3.38713	32_Uracil-Ethyne_0.95_dimer.out	0.518799	0.238057	0.378428	0.906882	0.0464393	0.476661	0.264359	0.363688	0.314023	0.0470023	0.0137932	0.0162682	0.0308506	0.0852812	0.0586509					3.90593	3.62519	3.76556	4.29401	3.43357	3.86379				3.65149	3.75082	3.70115	3.34013	3.40092	3.37086	3.41798	3.47241	3.44578					32_Uracil-Ethyne_0.95_dimer.out	32_Uracil-Ethyne_0.95.xyz	-491.526	-489.501	-491.401	-489.471
3.58724	32_Uracil-Ethyne_1.00_dimer.out	0.507306	0.273232	0.390269	0.859476	0.136963	0.498219	0.276412	0.362575	0.319493	0.0396936	0.0108783	0.0141049	0.0262886	0.0709084	0.0491194					4.09455	3.86047	3.97751	4.44672	3.72421	4.08546				3.86365	3.94982	3.90674	3.54755	3.59812	3.57314	3.61353	3.65815	3.63636					32_Uracil-Ethyne_1.00_dimer.out	32_Uracil-Ethyne_1.00.xyz	-491.527	-489.503	-491.401	-489.473
3.46393	32_Uracil-Ethyne_1.05_dimer.out	0.431068	0.229159	0.330114	0.734426	0.125381	0.429903	0.232177	0.297199	0.264688	0.0214435	0.00665146	0.00706128	0.0255363	0.0450135	0.0358864					3.895	3.69309	3.79405	4.19836	3.58931	3.89384				3.69611	3.76113	3.72862	3.44249	3.47059	3.45687	3.48947	3.50895	3.49982					32_Uracil-Ethyne_1.05_dimer.out	32_Uracil-Ethyne_1.05.xyz	-491.526	-489.504	-491.401	-489.474
3.18288	32_Uracil-Ethyne_1.10_dimer.out	0.349344	0.178457	0.2639	0.616098	0.098383	0.35724	0.174451	0.230956	0.202703	0.00122134	0.0242535	0.0118077	0.0378315	0.0541088	0.0465377					3.53223	3.36134	3.44678	3.79898	3.28127	3.54012				3.35733	3.41384	3.38559	3.18166	3.20714	3.19469	3.22071	3.23699	3.22942					32_Uracil-Ethyne_1.10_dimer.out	32_Uracil-Ethyne_1.10.xyz	-491.526	-489.505	-491.4	-489.475
2.15864	32_Uracil-Ethyne_1.25_dimer.out	0.173788	0.0680335	0.120911	0.346389	0.0417081	0.194049	0.0606255	0.0852934	0.0729594	0.029382	0.0282209	0.029076	0.049166	0.0400081	0.0451262					2.33243	2.22667	2.27955	2.50503	2.20035	2.35269				2.21926	2.24393	2.2316	2.18802	2.18686	2.18771	2.2078	2.19865	2.20377					32_Uracil-Ethyne_1.25_dimer.out	32_Uracil-Ethyne_1.25.xyz	-491.524	-489.505	-491.398	-489.475
1.01222	32_Uracil-Ethyne_1.50_dimer.out	0.0600173	0.0157305	0.0378739	0.133087	0.0176557	0.0753715	0.0121102	0.0144682	0.0132892	0.0904309	0.0752177	0.0830387	0.103949	0.0893995	0.0970021					1.07224	1.02796	1.0501	1.14531	1.02988	1.0876				1.02433	1.02669	1.02551	1.10266	1.08744	1.09526	1.11617	1.10162	1.10923					32_Uracil-Ethyne_1.50_dimer.out	32_Uracil-Ethyne_1.50.xyz	-491.522	-489.504	-491.396	-489.474
0.264394	32_Uracil-Ethyne_2.00_dimer.out	0.0142201	0.00631863	0.0102694	0.0416165	0.0049009	0.0232587	0.00374193	0.00724815	0.00175311	0.0165906	0.0234531	0.0200728	0.0238213	0.0312469	0.0276081					0.278614	0.270713	0.274664	0.306011	0.269295	0.287653				0.260652	0.271642	0.266147	0.280985	0.287847	0.284467	0.288215	0.295641	0.292002					32_Uracil-Ethyne_2.00_dimer.out	32_Uracil-Ethyne_2.00.xyz	-491.521	-489.504	-491.394	-489.474
0.667746	33_Pyridine-Ethene_0.90_dimer.out	0.44764	0.157103	0.302371	0.87164	0.0317192	0.41996	0.16965	0.280901	0.225275	0.151001	0.0661954	0.108397	0.10549	0.0115399	0.0584002					1.11539	0.824849	0.970118	1.53939	0.636027	1.08771				0.837397	0.948647	0.893022	0.516746	0.601551	0.559349	0.562257	0.656206	0.609346					33_Pyridine-Ethene_0.90_dimer.out	33_Pyridine-Ethene_0.90.xyz	-326.373	-324.851	-326.29	-324.833
1.447	33_Pyridine-Ethene_0.95_dimer.out	0.609208	0.369902	0.489555	0.955796	0.204518	0.580157	0.381972	0.478334	0.430153	0.0554665	0.0096264	0.0226982	0.0309388	0.0380184	0.0037351					2.05621	1.81691	1.93656	2.4028	1.65152	2.02716				1.82897	1.92534	1.87716	1.39154	1.45663	1.4243	1.41606	1.48502	1.45074					33_Pyridine-Ethene_0.95_dimer.out	33_Pyridine-Ethene_0.95.xyz	-326.375	-324.855	-326.292	-324.836
1.72072	33_Pyridine-Ethene_1.00_dimer.out	0.566052	0.365491	0.465772	0.910166	0.280364	0.595265	0.340439	0.421303	0.380871	0.0955038	0.0418637	0.0685059	0.0819743	0.0267443	0.0541982					2.28677	2.08621	2.18649	2.63089	2.00108	2.31599				2.06116	2.14202	2.10159	1.62522	1.67886	1.65222	1.63875	1.69398	1.66652					33_Pyridine-Ethene_1.00_dimer.out	33_Pyridine-Ethene_1.00.xyz	-326.375	-324.858	-326.292	-324.839
1.71932	33_Pyridine-Ethene_1.05_dimer.out	0.510443	0.344296	0.42737	0.782748	0.254962	0.518855	0.33191	0.402867	0.367389	0.0351398	0.0110519	0.011874	0.0281221	0.0183918	0.00468599					2.22976	2.06362	2.14669	2.50207	1.97428	2.23818				2.05123	2.12219	2.08671	1.68418	1.73037	1.70745	1.6912	1.73771	1.71464					33_Pyridine-Ethene_1.05_dimer.out	33_Pyridine-Ethene_1.05.xyz	-326.375	-324.859	-326.292	-324.84
1.58095	33_Pyridine-Ethene_1.10_dimer.out	0.41968	0.279707	0.349694	0.651534	0.218691	0.435113	0.267669	0.319711	0.29369	0.00712545	0.0327271	0.0201441	0.0132218	0.0394742	0.0266121					2.00063	1.86066	1.93065	2.23249	1.79964	2.01607				1.84862	1.90066	1.87464	1.58808	1.61368	1.6011	1.59418	1.62043	1.60757					33_Pyridine-Ethene_1.10_dimer.out	33_Pyridine-Ethene_1.10.xyz	-326.374	-324.86	-326.291	-324.841
0.984842	33_Pyridine-Ethene_1.25_dimer.out	0.182465	0.102531	0.142498	0.324727	0.0821726	0.20345	0.0891925	0.115878	0.102535	0.0358592	0.0450426	0.0406281	0.0388233	0.049539	0.0444088					1.16731	1.08737	1.12734	1.30957	1.06701	1.18829				1.07403	1.10072	1.08738	1.0207	1.02988	1.02547	1.02367	1.03438	1.02925					33_Pyridine-Ethene_1.25_dimer.out	33_Pyridine-Ethene_1.25.xyz	-326.373	-324.861	-326.29	-324.843
0.350189	33_Pyridine-Ethene_1.50_dimer.out	0.0689035	0.0396257	0.0542646	0.138748	0.0385841	0.0886663	0.0231108	0.0403086	0.0317097	0.0756721	0.0853509	0.0806085	0.0796574	0.0910999	0.0855054					0.419092	0.389814	0.404453	0.488937	0.388773	0.438855				0.373299	0.390497	0.381898	0.425861	0.435539	0.430797	0.429846	0.441288	0.435694					33_Pyridine-Ethene_1.50_dimer.out	33_Pyridine-Ethene_1.50.xyz	-326.372	-324.862	-326.289	-324.843
0.0416423	33_Pyridine-Ethene_2.00_dimer.out	0.016042	0.00806655	0.0120543	0.0395171	0.0126287	0.0260729	0.000650966	0.00507543	0.0028632	0.0118972	0.0194799	0.015657	0.017148	0.0260517	0.0215374					0.0576843	0.0497088	0.0536966	0.0811594	0.054271	0.0677152				0.0422933	0.0467177	0.0445055	0.0535395	0.0611222	0.0572993	0.0587903	0.067694	0.0631797					33_Pyridine-Ethene_2.00_dimer.out	33_Pyridine-Ethene_2.00.xyz	-326.371	-324.862	-326.288	-324.843
2.7964	34_Pentane-Pentane_0.90_dimer.out	0.0449064	0.226886	0.0909898	0.244164	0.586129	0.170983	0.0857336	0.00864605	0.0385438	0.106349	0.121014	0.112491	0.0103981	0.00349466	0.00525685					2.8413	2.56951	2.70541	3.04056	2.21027	2.62542				2.71066	2.80504	2.75785	2.69005	2.67538	2.68391	2.8068	2.7929	2.80165					34_Pentane-Pentane_0.90_dimer.out	34_Pentane-Pentane_0.90.xyz	-394.917	-392.82	-394.811	-392.796
3.56378	34_Pentane-Pentane_0.95_dimer.out	0.00786196	0.206745	0.0994416	0.174053	0.486006	0.155976	0.101099	0.0236522	0.0623755	0.0537378	0.0891922	0.0702139	0.0474411	0.0204107	0.0357011					3.57164	3.35703	3.46434	3.73783	3.07777	3.4078				3.46268	3.54013	3.5014	3.51004	3.47459	3.49356	3.61122	3.58419	3.59948					34_Pentane-Pentane_0.95_dimer.out	34_Pentane-Pentane_0.95.xyz	-394.918	-392.824	-394.812	-392.8
3.72259	34_Pentane-Pentane_1.00_dimer.out	0.0438532	0.219167	0.13151	0.116061	0.431847	0.157893	0.148698	0.0797265	0.114212	0.0786592	0.108043	0.0922531	0.0106503	0.0118232	0.000984886					3.67874	3.50343	3.59108	3.83865	3.29075	3.5647				3.5739	3.64287	3.60838	3.64393	3.61455	3.63034	3.73324	3.71077	3.72358					34_Pentane-Pentane_1.00_dimer.out	34_Pentane-Pentane_1.00.xyz	-394.918	-392.827	-394.812	-392.803
3.56736	34_Pentane-Pentane_1.05_dimer.out	0.0199243	0.161652	0.0907882	0.101891	0.329731	0.11392	0.0997905	0.0514538	0.0756222	0.0491488	0.106454	0.0766288	0.0244038	0.0330475	0.00254007					3.54744	3.40571	3.47657	3.66925	3.23763	3.45344				3.46757	3.51591	3.49174	3.51821	3.46091	3.49073	3.59177	3.53431	3.56482					34_Pentane-Pentane_1.05_dimer.out	34_Pentane-Pentane_1.05.xyz	-394.918	-392.829	-394.812	-392.805
3.26495	34_Pentane-Pentane_1.10_dimer.out	0.0255249	0.141475	0.0834998	0.0801067	0.275396	0.0976446	0.0947806	0.0536712	0.0742259	0.0157701	0.0396182	0.0108353	0.0727345	0.0231439	0.0495034					3.23943	3.12348	3.18145	3.34506	2.98955	3.16731				3.17017	3.21128	3.19072	3.28072	3.22533	3.25412	3.33768	3.28809	3.31445					34_Pentane-Pentane_1.10_dimer.out	34_Pentane-Pentane_1.10.xyz	-394.917	-392.83	-394.811	-392.806
2.21088	34_Pentane-Pentane_1.25_dimer.out	0.0609052	0.127868	0.0943866	0.0116957	0.185825	0.0870646	0.108505	0.0898695	0.0991872	0.0931121	0.0535442	0.0740222	0.137236	0.101758	0.120518					2.14997	2.08301	2.11649	2.22258	2.02505	2.12381				2.10237	2.12101	2.11169	2.30399	2.26442	2.2849	2.34812	2.31264	2.3314					34_Pentane-Pentane_1.25_dimer.out	34_Pentane-Pentane_1.25.xyz	-394.916	-392.832	-394.81	-392.808
1.03869	34_Pentane-Pentane_1.50_dimer.out	0.0195406	0.0679766	0.0437586	0.0099014	0.0817805	0.045841	0.0258604	0.0589263	0.0423933	0.118365	0.0390423	0.0792508	0.142676	0.0647671	0.104546					1.01915	0.970712	0.99493	1.02879	0.956908	0.992848				1.01283	0.979763	0.996296	1.15705	1.07773	1.11794	1.18136	1.10346	1.14324					34_Pentane-Pentane_1.50_dimer.out	34_Pentane-Pentane_1.50.xyz	-394.914	-392.832	-394.808	-392.808
0.262657	34_Pentane-Pentane_2.00_dimer.out	0.00876436	0.000567836	0.00409826	0.0136093	0.00656756	0.0100884	0.0234333	0.00336579	0.0133995	0.0621938	0.0215726	0.0421193	0.0707945	0.0306975	0.0510977					0.271421	0.262089	0.266755	0.249047	0.256089	0.252568				0.28609	0.266022	0.276056	0.32485	0.284229	0.304776	0.333451	0.293354	0.313754					34_Pentane-Pentane_2.00_dimer.out	34_Pentane-Pentane_2.00.xyz	-394.913	-392.832	-394.806	-392.808
1.82214	35_Neopentane-Pentane_0.90_dimer.out	0.228781	0.403069	0.315925	0.0767757	0.665545	0.37116	0.328442	0.230981	0.279712	0.0928714	0.101918	0.0961616	0.00185105	0.00399603	0.00112046					1.59336	1.41907	1.50622	1.74537	1.1566	1.45098				1.4937	1.59116	1.54243	1.72927	1.72022	1.72598	1.82029	1.81814	1.82102					35_Neopentane-Pentane_0.90_dimer.out	35_Neopentane-Pentane_0.90.xyz	-394.921	-392.823	-394.815	-392.799
2.46012	35_Neopentane-Pentane_0.95_dimer.out	0.157238	0.290792	0.224015	0.0191674	0.482202	0.250685	0.247762	0.165297	0.206529	0.0555025	0.0803523	0.0666974	0.0209729	0.00272194	0.0136338					2.30288	2.16932	2.2361	2.44095	1.97791	2.20943				2.21235	2.29482	2.25359	2.40461	2.37976	2.39342	2.48109	2.46284	2.47375					35_Neopentane-Pentane_0.95_dimer.out	35_Neopentane-Pentane_0.95.xyz	-394.922	-392.827	-394.816	-392.803
2.57959	35_Neopentane-Pentane_1.00_dimer.out	0.141007	0.250126	0.195566	0.0107195	0.397834	0.204277	0.226428	0.153284	0.189856	0.036377	0.0510413	0.0426937	0.0348819	0.0276573	0.0327231					2.43858	2.32946	2.38402	2.56887	2.18175	2.37531				2.35316	2.4263	2.38973	2.54321	2.52855	2.53689	2.61447	2.60725	2.61231					35_Neopentane-Pentane_1.00_dimer.out	35_Neopentane-Pentane_1.00.xyz	-394.922	-392.829	-394.816	-392.805
2.45554	35_Neopentane-Pentane_1.05_dimer.out	0.110975	0.191002	0.150989	0.00788726	0.306835	0.149474	0.188905	0.115058	0.151982	0.00916649	0.0284484	0.0177365	0.0477692	0.0333517	0.0421267					2.34457	2.26454	2.30455	2.46343	2.14871	2.30607				2.26664	2.34048	2.30356	2.44638	2.42709	2.43781	2.50331	2.48889	2.49767					35_Neopentane-Pentane_1.05_dimer.out	35_Neopentane-Pentane_1.05.xyz	-394.922	-392.83	-394.816	-392.806
2.22804	35_Neopentane-Pentane_1.10_dimer.out	0.0887622	0.161838	0.1253	0.0107922	0.249957	0.119582	0.154033	0.104064	0.129049	0.0310255	0.0031186	0.014927	0.0759692	0.0459757	0.0624007					2.13928	2.0662	2.10274	2.23883	1.97808	2.10846				2.07401	2.12398	2.09899	2.25907	2.22492	2.24297	2.30401	2.27402	2.29044					35_Neopentane-Pentane_1.10_dimer.out	35_Neopentane-Pentane_1.10.xyz	-394.922	-392.831	-394.816	-392.807
1.47908	35_Neopentane-Pentane_1.25_dimer.out	0.103768	0.144659	0.124213	0.0269741	0.163459	0.0952166	0.154117	0.132333	0.143225	0.0221907	0.0181483	0.00275124	0.0594129	0.0228041	0.0421787					1.37532	1.33443	1.35487	1.45211	1.31563	1.38387				1.32497	1.34675	1.33586	1.50127	1.46094	1.48184	1.5385	1.50189	1.52126					35_Neopentane-Pentane_1.25_dimer.out	35_Neopentane-Pentane_1.25.xyz	-394.92	-392.832	-394.815	-392.808
0.689927	35_Neopentane-Pentane_1.50_dimer.out	0.0367545	0.0572428	0.0469987	0.0135953	0.0672865	0.0404409	0.0519384	0.0506579	0.0512981	0.0476674	0.0204435	0.0343956	0.0682513	0.0444447	0.0568248					0.653173	0.632685	0.642929	0.676332	0.622641	0.649487				0.637989	0.63927	0.638629	0.737595	0.710371	0.724323	0.758179	0.734372	0.746752					35_Neopentane-Pentane_1.50_dimer.out	35_Neopentane-Pentane_1.50.xyz	-394.919	-392.832	-394.813	-392.808
0.184665	35_Neopentane-Pentane_2.00_dimer.out	5.35366e-05	0.0110708	0.00556215	0.00470818	0.0086134	0.00666079	0.00299821	0.0126819	0.00484184	0.0246125	0.0044407	0.0102385	0.027836	0.000347361	0.013961					0.184611	0.173594	0.179103	0.179957	0.176051	0.178004				0.187663	0.171983	0.179823	0.209277	0.180224	0.194903	0.212501	0.184318	0.198626					35_Neopentane-Pentane_2.00_dimer.out	35_Neopentane-Pentane_2.00.xyz	-394.919	-392.832	-394.813	-392.808
1.42522	36_Neopentane-Neopentane_0.90_dimer.out	0.238139	0.340523	0.289331	0.128551	0.491069	0.30981	0.30999	0.241819	0.275905	0.0515835	0.0668243	0.0582177	0.0184781	0.0154704	0.0183196					1.18708	1.08469	1.13589	1.29667	0.934147	1.11541				1.11523	1.1834	1.14931	1.37363	1.35839	1.367	1.44369	1.44069	1.44354					36_Neopentane-Neopentane_0.90_dimer.out	36_Neopentane-Neopentane_0.90.xyz	-394.926	-392.827	-394.821	-392.803
1.70454	36_Neopentane-Neopentane_0.95_dimer.out	0.207905	0.281208	0.244556	0.0828731	0.377342	0.230108	0.28988	0.218179	0.254029	0.068971	0.0871258	0.0770019	0.000494803	0.0111746	0.00382055					1.49664	1.42333	1.45998	1.62167	1.3272	1.47443				1.41466	1.48636	1.45051	1.63557	1.61742	1.62754	1.70504	1.69337	1.70072					36_Neopentane-Neopentane_0.95_dimer.out	36_Neopentane-Neopentane_0.95.xyz	-394.927	-392.829	-394.821	-392.805
1.74209	36_Neopentane-Neopentane_1.00_dimer.out	0.157481	0.234384	0.195932	0.0808456	0.324939	0.202892	0.207725	0.175012	0.191369	0.0317081	0.0186836	0.00748981	0.0850143	0.0386876	0.0633019					1.58461	1.50771	1.54616	1.66124	1.41715	1.5392				1.53437	1.56708	1.55072	1.7738	1.72341	1.74958	1.8271	1.78078	1.80539					36_Neopentane-Neopentane_1.00_dimer.out	36_Neopentane-Neopentane_1.00.xyz	-394.927	-392.83	-394.821	-392.806
1.62466	36_Neopentane-Neopentane_1.05_dimer.out	0.0941869	0.177063	0.135625	0.0368674	0.23924	0.138054	0.131768	0.136297	0.134032	0.0848182	0.00161319	0.0441384	0.133896	0.0534987	0.095081					1.53047	1.4476	1.48904	1.58779	1.38542	1.48661				1.49289	1.48836	1.49063	1.70948	1.62627	1.6688	1.75856	1.67816	1.71974					36_Neopentane-Neopentane_1.05_dimer.out	36_Neopentane-Neopentane_1.05.xyz	-394.927	-392.831	-394.821	-392.807
1.5021	36_Neopentane-Neopentane_1.10_dimer.out	0.0886574	0.1637	0.126179	0.0485144	0.217452	0.132983	0.114976	0.128458	0.121717	0.0850969	0.00501787	0.0458431	0.123893	0.0485625	0.0873692					1.41344	1.3384	1.37592	1.45358	1.28465	1.36912				1.38712	1.37364	1.38038	1.5872	1.50712	1.54794	1.62599	1.55066	1.58947					36_Neopentane-Neopentane_1.10_dimer.out	36_Neopentane-Neopentane_1.10.xyz	-394.926	-392.832	-394.821	-392.808
1.01832	36_Neopentane-Neopentane_1.25_dimer.out	0.109827	0.142701	0.126264	0.0700742	0.158027	0.11405	0.135891	0.132652	0.134272	0.0342616	0.00843762	0.0134628	0.0661955	0.0315169	0.0495891					0.90849	0.875617	0.892053	0.948243	0.860291	0.904267				0.882427	0.885665	0.884046	1.05258	1.00988	1.03178	1.08451	1.04983	1.06791					36_Neopentane-Neopentane_1.25_dimer.out	36_Neopentane-Neopentane_1.25.xyz	-394.926	-392.832	-394.82	-392.808
0.497189	36_Neopentane-Neopentane_1.50_dimer.out	0.0530657	0.0531573	0.0531115	0.0163256	0.061522	0.0389238	0.0771537	0.0476732	0.0624134	0.00538712	0.00285458	0.0010135	0.00689859	0.0197981	0.0136663					0.444123	0.444032	0.444077	0.480863	0.435667	0.458265				0.420035	0.449516	0.434775	0.491802	0.500043	0.496175	0.504087	0.516987	0.510855					36_Neopentane-Neopentane_1.50_dimer.out	36_Neopentane-Neopentane_1.50.xyz	-394.925	-392.833	-394.819	-392.809
0.13246	36_Neopentane-Neopentane_2.00_dimer.out	0.00811793	0.00752095	0.000298492	0.000710914	0.00610962	0.00269935	0.0129742	0.00844627	0.00226398	0.031542	0.0011839	0.0153082	0.033905	0.00272742	0.0184862					0.140578	0.124939	0.132759	0.133171	0.126351	0.129761				0.145435	0.124014	0.134724	0.164002	0.131277	0.147769	0.166365	0.135188	0.150947					36_Neopentane-Neopentane_2.00_dimer.out	36_Neopentane-Neopentane_2.00.xyz	-394.924	-392.833	-394.819	-392.809
1.57585	37_Cyclopentane-Neopentane_0.90_dimer.out	0.115619	0.291313	0.203466	0.0508634	0.581068	0.265102	0.224771	0.101339	0.163055	0.066829	0.0533245	0.0588276	0.0297919	0.0503232	0.0418707					1.46023	1.28454	1.37238	1.62671	0.994782	1.31075				1.35108	1.47451	1.4128	1.50902	1.52253	1.51702	1.60564	1.62617	1.61772					37_Cyclopentane-Neopentane_0.90_dimer.out	37_Cyclopentane-Neopentane_0.90.xyz	-393.711	-391.649	-393.606	-391.625
2.21712	37_Cyclopentane-Neopentane_0.95_dimer.out	0.096689	0.229301	0.162995	0.0592735	0.458224	0.199475	0.198943	0.0792117	0.139078	0.023658	0.00783225	0.0145572	0.0533296	0.0717563	0.064329					2.12043	1.98782	2.05412	2.27639	1.75889	2.01764				2.01818	2.13791	2.07804	2.19346	2.20929	2.20256	2.27045	2.28887	2.28145					37_Cyclopentane-Neopentane_0.95_dimer.out	37_Cyclopentane-Neopentane_0.95.xyz	-393.712	-391.652	-393.607	-391.628
2.37278	37_Cyclopentane-Neopentane_1.00_dimer.out	0.108968	0.225337	0.167153	0.0521853	0.37703	0.162422	0.214625	0.125883	0.170254	0.0445512	0.0519385	0.0471436	0.0258885	0.0190742	0.0241676					2.26381	2.14744	2.20563	2.42496	1.99575	2.21036				2.15815	2.2469	2.20252	2.32823	2.32084	2.32563	2.39867	2.39185	2.39695					37_Cyclopentane-Neopentane_1.00_dimer.out	37_Cyclopentane-Neopentane_1.00.xyz	-393.712	-391.654	-393.607	-391.631
2.29461	37_Cyclopentane-Neopentane_1.05_dimer.out	0.0896048	0.186544	0.138074	0.0461024	0.306192	0.130045	0.178579	0.108098	0.143339	0.00289679	0.0256019	0.0131789	0.0565922	0.0346491	0.0472531					2.20501	2.10807	2.15654	2.34071	1.98842	2.16457				2.11603	2.18651	2.15127	2.29171	2.26901	2.28143	2.3512	2.32926	2.34186					37_Cyclopentane-Neopentane_1.05_dimer.out	37_Cyclopentane-Neopentane_1.05.xyz	-393.712	-391.656	-393.607	-391.632
2.11081	37_Cyclopentane-Neopentane_1.10_dimer.out	0.0845815	0.166971	0.125776	0.0382313	0.257718	0.109743	0.165102	0.107474	0.136288	0.0372163	0.0117026	0.0254272	0.086765	0.0641869	0.0769212					2.02623	1.94384	1.98503	2.14904	1.85309	2.00107				1.94571	2.00333	1.97452	2.14803	2.12251	2.13624	2.19757	2.175	2.18773					37_Cyclopentane-Neopentane_1.10_dimer.out	37_Cyclopentane-Neopentane_1.10.xyz	-393.711	-391.656	-393.607	-391.633
1.44924	37_Cyclopentane-Neopentane_1.25_dimer.out	0.0606843	0.111488	0.0860859	0.0200511	0.158677	0.0693129	0.113617	0.0805484	0.0970829	0.0502493	0.0250822	0.0383497	0.0867804	0.065754	0.0772602					1.38855	1.33775	1.36315	1.46929	1.29056	1.37992				1.33562	1.36869	1.35215	1.49948	1.47432	1.48759	1.53602	1.51499	1.5265					37_Cyclopentane-Neopentane_1.25_dimer.out	37_Cyclopentane-Neopentane_1.25.xyz	-393.71	-391.658	-393.606	-391.634
0.698891	37_Cyclopentane-Neopentane_1.50_dimer.out	0.0320722	0.0631202	0.0475962	0.00588424	0.0751346	0.0346252	0.0569577	0.0552432	0.0561004	0.0523489	0.0172019	0.0352099	0.0743303	0.0411617	0.0583876					0.666819	0.635771	0.651295	0.704775	0.623756	0.664266				0.641933	0.643648	0.642791	0.75124	0.716093	0.734101	0.773221	0.740053	0.757279					37_Cyclopentane-Neopentane_1.50_dimer.out	37_Cyclopentane-Neopentane_1.50.xyz	-393.709	-391.658	-393.605	-391.634
0.188656	37_Cyclopentane-Neopentane_2.00_dimer.out	0.0019807	0.0124998	0.00724024	0.00462096	0.0113884	0.00338371	0.00630897	0.0132284	0.00976871	0.0162418	0.00526395	0.00565509	0.0194459	0.00110438	0.00940618					0.186675	0.176156	0.181416	0.193277	0.177267	0.185272				0.182347	0.175427	0.178887	0.204898	0.183392	0.194311	0.208102	0.187551	0.198062					37_Cyclopentane-Neopentane_2.00_dimer.out	37_Cyclopentane-Neopentane_2.00.xyz	-393.709	-391.658	-393.604	-391.634
2.19808	38_Cyclopentane-Cyclopentane_0.90_dimer.out	0.062885	0.274949	0.168917	0.214424	0.550146	0.167861	0.244698	0.09452	0.169609	0.167904	0.151425	0.158177	0.0784146	0.0594052	0.0666932					2.1352	1.92313	2.02916	2.41251	1.64794	2.03022				1.95338	2.10356	2.02847	2.03018	2.04666	2.0399	2.11967	2.13868	2.13139					38_Cyclopentane-Cyclopentane_0.90_dimer.out	38_Cyclopentane-Cyclopentane_0.90.xyz	-392.496	-390.473	-392.392	-390.45
2.80041	38_Cyclopentane-Cyclopentane_0.95_dimer.out	0.0868778	0.259469	0.173173	0.171169	0.482013	0.155422	0.256062	0.113561	0.184812	0.0843321	0.0701919	0.0758069	0.00914184	0.00662689	0.0009358					2.71353	2.54094	2.62724	2.97158	2.3184	2.64499				2.54435	2.68685	2.6156	2.71608	2.73022	2.7246	2.79127	2.80704	2.80135					38_Cyclopentane-Cyclopentane_0.95_dimer.out	38_Cyclopentane-Cyclopentane_0.95.xyz	-392.497	-390.477	-392.393	-390.453
2.95617	38_Cyclopentane-Cyclopentane_1.00_dimer.out	0.0874098	0.221876	0.154643	0.175673	0.382353	0.10334	0.259896	0.116662	0.188279	0.095778	0.0696676	0.081393	0.024146	0.00277662	0.00866629					2.86876	2.7343	2.80153	3.13184	2.57382	2.85283				2.69628	2.83951	2.76789	2.86039	2.8865	2.87478	2.93203	2.95895	2.94751					38_Cyclopentane-Cyclopentane_1.00_dimer.out	38_Cyclopentane-Cyclopentane_1.00.xyz	-392.497	-390.479	-392.393	-390.456
2.82352	38_Cyclopentane-Cyclopentane_1.05_dimer.out	0.0912059	0.195027	0.143116	0.16536	0.312542	0.073591	0.25942	0.11798	0.1887	0.0828992	0.0528902	0.0666239	0.0264397	0.00325194	0.00965079					2.73231	2.62849	2.6804	2.98888	2.51097	2.74992				2.5641	2.70554	2.63482	2.74062	2.77063	2.75689	2.79708	2.82677	2.81386					38_Cyclopentane-Cyclopentane_1.05_dimer.out	38_Cyclopentane-Cyclopentane_1.05.xyz	-392.497	-390.481	-392.393	-390.457
2.56285	38_Cyclopentane-Cyclopentane_1.10_dimer.out	0.0813622	0.162496	0.121929	0.151453	0.256679	0.0526133	0.234004	0.100747	0.167375	0.0421007	0.00345992	0.0216897	0.00624391	0.0477803	0.0286362					2.48148	2.40035	2.44092	2.7143	2.30617	2.51023				2.32884	2.4621	2.39547	2.52075	2.55939	2.54116	2.56909	2.61063	2.59148					38_Cyclopentane-Cyclopentane_1.10_dimer.out	38_Cyclopentane-Cyclopentane_1.10.xyz	-392.496	-390.482	-392.393	-390.458
1.69325	38_Cyclopentane-Cyclopentane_1.25_dimer.out	0.0686549	0.104105	0.08638	0.086867	0.155416	0.0342747	0.17062	0.0704636	0.120542	0.0347548	0.062866	0.0496573	0.0723925	0.103205	0.0890635					1.6246	1.58915	1.60687	1.78012	1.53784	1.65898				1.52263	1.62279	1.57271	1.72801	1.75612	1.74291	1.76564	1.79646	1.78232					38_Cyclopentane-Cyclopentane_1.25_dimer.out	38_Cyclopentane-Cyclopentane_1.25.xyz	-392.495	-390.483	-392.391	-390.459
0.780367	38_Cyclopentane-Cyclopentane_1.50_dimer.out	0.025736	0.0543293	0.0400326	0.0384783	0.0637328	0.0126272	0.0678371	0.048164	0.0580006	0.0634131	0.0358964	0.0502085	0.0865164	0.0609417	0.0745517					0.754631	0.726037	0.740334	0.818845	0.716634	0.767739				0.71253	0.732203	0.722366	0.84378	0.816263	0.830575	0.866883	0.841308	0.854918					38_Cyclopentane-Cyclopentane_1.50_dimer.out	38_Cyclopentane-Cyclopentane_1.50.xyz	-392.494	-390.483	-392.39	-390.46
0.200665	38_Cyclopentane-Cyclopentane_2.00_dimer.out	0.00643473	0.0041741	0.00530441	0.0104442	0.00472734	0.00285846	0.0175012	0.00381138	0.0106563	0.00821979	0.00417231	0.00639767	0.0125922	0.00879053	0.0109917					0.19423	0.196491	0.195361	0.211109	0.195938	0.203524				0.183164	0.196854	0.190009	0.208885	0.204837	0.207063	0.213257	0.209456	0.211657					38_Cyclopentane-Cyclopentane_2.00_dimer.out	38_Cyclopentane-Cyclopentane_2.00.xyz	-392.493	-390.483	-392.389	-390.46
1.9687	39_Benzene-Cyclopentane_0.90_dimer.out	0.598947	0.210798	0.404873	1.24475	0.033221	0.605764	0.175538	0.370786	0.273162	0.212376	0.165057	0.187202	0.103116	0.0657998	0.0820756					2.56765	2.1795	2.37357	3.21345	1.93548	2.57446				2.14424	2.33948	2.24186	1.75632	1.80364	1.7815	1.86558	1.9029	1.88662					39_Benzene-Cyclopentane_0.90_dimer.out	39_Benzene-Cyclopentane_0.90.xyz	-428.127	-426.022	-428.016	-425.998
3.08098	39_Benzene-Cyclopentane_0.95_dimer.out	0.538236	0.221853	0.380044	1.15443	0.0910288	0.622729	0.134239	0.307626	0.220932	0.219155	0.186524	0.201394	0.130888	0.111036	0.118642					3.61922	3.30283	3.46102	4.23541	3.17201	3.70371				3.21522	3.3886	3.30191	2.86182	2.89446	2.87958	2.95009	2.96994	2.96234					39_Benzene-Cyclopentane_0.95_dimer.out	39_Benzene-Cyclopentane_0.95.xyz	-428.128	-426.028	-428.018	-426.003
3.43781	39_Benzene-Cyclopentane_1.00_dimer.out	0.528578	0.270176	0.399377	1.01933	0.119593	0.569461	0.206825	0.368904	0.287864	0.0753389	0.0402306	0.0564705	0.00571236	0.0173753	0.00794775					3.96639	3.70799	3.83719	4.45714	3.5574	4.00727				3.64464	3.80671	3.72567	3.36247	3.39758	3.38134	3.4321	3.45519	3.44576					39_Benzene-Cyclopentane_1.00_dimer.out	39_Benzene-Cyclopentane_1.00.xyz	-428.129	-426.031	-428.018	-426.006
3.36393	39_Benzene-Cyclopentane_1.05_dimer.out	0.504428	0.294963	0.399695	0.914618	0.160681	0.53765	0.235493	0.383002	0.309248	0.00249897	0.033728	0.0167689	0.055904	0.083006	0.071291					3.86836	3.65889	3.76362	4.27855	3.52461	3.90158				3.59942	3.74693	3.67318	3.36143	3.39766	3.3807	3.41983	3.44693	3.43522					39_Benzene-Cyclopentane_1.05_dimer.out	39_Benzene-Cyclopentane_1.05.xyz	-428.129	-426.033	-428.018	-426.008
3.08312	39_Benzene-Cyclopentane_1.10_dimer.out	0.38188	0.210574	0.296227	0.754111	0.124941	0.439526	0.137833	0.266717	0.202275	0.0149169	0.0452046	0.0311079	0.0644151	0.0893073	0.0784958					3.465	3.29369	3.37935	3.83723	3.20806	3.52265				3.22095	3.34984	3.2854	3.09804	3.12832	3.11423	3.14754	3.17243	3.16162					39_Benzene-Cyclopentane_1.10_dimer.out	39_Benzene-Cyclopentane_1.10.xyz	-428.128	-426.034	-428.017	-426.01
2.02564	39_Benzene-Cyclopentane_1.25_dimer.out	0.16639	0.0765921	0.121491	0.399477	0.034355	0.216916	0.0135704	0.104284	0.0589273	0.125156	0.135885	0.131429	0.158106	0.171691	0.16623					2.19203	2.10224	2.14714	2.42512	2.06	2.24256				2.03921	2.12993	2.08457	2.1508	2.16153	2.15707	2.18375	2.19734	2.19187					39_Benzene-Cyclopentane_1.25_dimer.out	39_Benzene-Cyclopentane_1.25.xyz	-428.126	-426.036	-428.015	-426.011
0.88369	39_Benzene-Cyclopentane_1.50_dimer.out	0.071254	0.0263952	0.0488246	0.17358	0.020704	0.097142	0.00416552	0.0301266	0.0171461	0.136387	0.118491	0.127956	0.158263	0.143879	0.151814					0.954944	0.910085	0.932514	1.05727	0.904394	0.980832				0.887855	0.913816	0.900836	1.02008	1.00218	1.01165	1.04195	1.02757	1.0355					39_Benzene-Cyclopentane_1.50_dimer.out	39_Benzene-Cyclopentane_1.50.xyz	-428.124	-426.036	-428.013	-426.011
0.188667	39_Benzene-Cyclopentane_2.00_dimer.out	0.0192182	0.00884553	0.0140319	0.0411093	0.00905133	0.0250803	0.00486569	0.0087106	0.00678814	0.0336592	0.0221202	0.0280664	0.0402276	0.0289514	0.0348547					0.207885	0.197512	0.202698	0.229776	0.197718	0.213747				0.193532	0.197377	0.195455	0.222326	0.210787	0.216733	0.228894	0.217618	0.223521					39_Benzene-Cyclopentane_2.00_dimer.out	39_Benzene-Cyclopentane_2.00.xyz	-428.123	-426.036	-428.012	-426.011
1.7119	40_Benzene-Neopentane_0.90_dimer.out	0.344435	0.061784	0.20311	0.737541	0.203197	0.267172	0.0867018	0.235514	0.161108	0.00465282	0.0254271	0.0116638	0.0895902	0.117514	0.105505					2.05633	1.77368	1.91501	2.44944	1.5087	1.97907				1.7986	1.94741	1.87301	1.70724	1.73732	1.72356	1.80149	1.82941	1.8174					40_Benzene-Neopentane_0.90_dimer.out	40_Benzene-Neopentane_0.90.xyz	-429.342	-427.201	-429.23	-427.176
2.54891	40_Benzene-Neopentane_0.95_dimer.out	0.349299	0.119606	0.234453	0.702433	0.0803761	0.311029	0.117772	0.250721	0.184247	0.00284147	0.0247497	0.0120761	0.0726568	0.0970032	0.086556					2.89821	2.66852	2.78337	3.25135	2.46854	2.85994				2.66669	2.79964	2.73316	2.54607	2.57366	2.56099	2.62157	2.64592	2.63547					40_Benzene-Neopentane_0.95_dimer.out	40_Benzene-Neopentane_0.95.xyz	-429.343	-427.205	-429.232	-427.18
2.79053	40_Benzene-Neopentane_1.00_dimer.out	0.327506	0.13453	0.231018	0.627631	0.0223452	0.302643	0.130733	0.237382	0.184058	0.0334599	0.0507348	0.0430505	0.100729	0.11887	0.11121					3.11803	2.92506	3.02154	3.41816	2.76818	3.09317				2.92126	3.02791	2.97458	2.82399	2.84126	2.83358	2.89126	2.9094	2.90174					40_Benzene-Neopentane_1.00_dimer.out	40_Benzene-Neopentane_1.00.xyz	-429.343	-427.207	-429.232	-427.182
2.72088	40_Benzene-Neopentane_1.05_dimer.out	0.307729	0.148506	0.228118	0.578047	0.0313908	0.304719	0.130499	0.225291	0.177895	0.0408123	0.0586365	0.0505436	0.0945343	0.111855	0.104424					3.02861	2.86939	2.949	3.29893	2.75227	3.0256				2.85138	2.94617	2.89878	2.76169	2.77952	2.77143	2.81542	2.83274	2.82531					40_Benzene-Neopentane_1.05_dimer.out	40_Benzene-Neopentane_1.05.xyz	-429.343	-427.209	-429.232	-427.184
2.5023	40_Benzene-Neopentane_1.10_dimer.out	0.250379	0.106454	0.178417	0.481008	0.0218555	0.251432	0.0991705	0.16192	0.130545	0.107164	0.0959212	0.102356	0.153971	0.142503	0.149468					2.75268	2.60876	2.68072	2.98331	2.52416	2.75374				2.60147	2.66422	2.63285	2.60947	2.59822	2.60466	2.65627	2.64481	2.65177					40_Benzene-Neopentane_1.10_dimer.out	40_Benzene-Neopentane_1.10.xyz	-429.343	-427.21	-429.231	-427.184
1.67429	40_Benzene-Neopentane_1.25_dimer.out	0.112443	0.0323384	0.0723907	0.265032	0.00192154	0.131555	0.0124002	0.0548005	0.0336003	0.129485	0.110832	0.12086	0.164514	0.147754	0.15718					1.78674	1.70663	1.74668	1.93933	1.67237	1.80585				1.68669	1.72909	1.70789	1.80378	1.78512	1.79515	1.83881	1.82205	1.83147					40_Benzene-Neopentane_1.25_dimer.out	40_Benzene-Neopentane_1.25.xyz	-429.341	-427.211	-429.23	-427.186
0.762121	40_Benzene-Neopentane_1.50_dimer.out	0.0478697	0.004855	0.0263623	0.101061	0.00490537	0.0480776	0.0129959	0.0112542	0.0121251	0.126537	0.0888637	0.108126	0.147175	0.110897	0.129674					0.80999	0.766976	0.788483	0.863181	0.757215	0.810198				0.775117	0.773375	0.774246	0.888658	0.850984	0.870247	0.909295	0.873018	0.891794					40_Benzene-Neopentane_1.50_dimer.out	40_Benzene-Neopentane_1.50.xyz	-429.34	-427.211	-429.228	-427.186
0.186544	40_Benzene-Neopentane_2.00_dimer.out	0.0174237	0.00660639	0.012015	0.0329054	0.00362186	0.0182636	0.00727335	0.00856315	0.00791825	0.0314468	0.0225342	0.0271091	0.0369491	0.0286082	0.0329518					0.203968	0.19315	0.198559	0.219449	0.190166	0.204808				0.193817	0.195107	0.194462	0.217991	0.209078	0.213653	0.223493	0.215152	0.219496					40_Benzene-Neopentane_2.00_dimer.out	40_Benzene-Neopentane_2.00.xyz	-429.339	-427.211	-429.227	-427.186
3.67913	41_Uracil-Pentane_0.90_dimer.out	0.365025	0.16606	0.0994823	1.01569	0.509325	0.253181	0.0615713	0.0589963	0.00128749	0.17009	0.203235	0.185007	0.0321758	0.00276167	0.0172731					4.04416	3.51307	3.77861	4.69482	3.16981	3.93231				3.61756	3.73813	3.67784	3.50904	3.4759	3.49412	3.71131	3.67637	3.6964					41_Uracil-Pentane_0.90_dimer.out	41_Uracil-Pentane_0.90.xyz	-611.772	-609.053	-611.613	-609.016
4.56038	41_Uracil-Pentane_0.95_dimer.out	0.370132	0.0697959	0.150168	0.913632	0.358352	0.27764	0.0137955	0.119391	0.0665934	0.0905918	0.134596	0.110982	0.07017	0.0219992	0.0486002					4.93051	4.49058	4.71054	5.47401	4.20202	4.83802				4.57417	4.67977	4.62697	4.46978	4.42578	4.44939	4.63055	4.58238	4.60898					41_Uracil-Pentane_0.95_dimer.out	41_Uracil-Pentane_0.95.xyz	-611.774	-609.058	-611.614	-609.021
4.72406	41_Uracil-Pentane_1.00_dimer.out	0.33059	0.0362194	0.147185	0.815633	0.250221	0.282706	0.0125795	0.104088	0.0583335	0.0686386	0.108902	0.0873479	0.069602	0.0273893	0.0506881					5.05465	4.68785	4.87125	5.5397	4.47384	5.00677				4.73664	4.82815	4.7824	4.65543	4.61516	4.63672	4.79367	4.75145	4.77475					41_Uracil-Pentane_1.00_dimer.out	41_Uracil-Pentane_1.00.xyz	-611.774	-609.061	-611.614	-609.024
4.50168	41_Uracil-Pentane_1.05_dimer.out	0.336969	0.0241064	0.180538	0.767867	0.135676	0.316095	0.054458	0.128865	0.0916616	0.0010807	0.0449644	0.0217408	0.114284	0.067915	0.0930846					4.83865	4.52579	4.68222	5.26955	4.36601	4.81778				4.55614	4.63055	4.59334	4.5006	4.45672	4.47994	4.61597	4.5696	4.59477					41_Uracil-Pentane_1.05_dimer.out	41_Uracil-Pentane_1.05.xyz	-611.773	-609.063	-611.614	-609.026
3.99925	41_Uracil-Pentane_1.10_dimer.out	0.199951	0.0562105	0.0718703	0.572183	0.160911	0.205636	0.0440966	0.0124346	0.015831	0.0422018	0.00378298	0.0240575	0.134137	0.0960371	0.116721					4.1992	3.94304	4.07112	4.57143	3.83834	4.20489				3.95515	4.01169	3.98342	4.04145	4.00303	4.02331	4.13339	4.09529	4.11597					41_Uracil-Pentane_1.10_dimer.out	41_Uracil-Pentane_1.10.xyz	-611.772	-609.065	-611.613	-609.027
2.40241	41_Uracil-Pentane_1.25_dimer.out	0.00784262	0.113087	0.0526223	0.238372	0.145553	0.0464094	0.1433	0.0918015	0.117551	0.11275	0.0824226	0.0985546	0.172344	0.142016	0.15869					2.41026	2.28933	2.34979	2.64079	2.25686	2.44882				2.25911	2.31061	2.28486	2.51516	2.48484	2.50097	2.57476	2.54443	2.5611					41_Uracil-Pentane_1.25_dimer.out	41_Uracil-Pentane_1.25.xyz	-611.77	-609.066	-611.61	-609.029
0.961312	41_Uracil-Pentane_1.50_dimer.out	0.00461852	0.0343013	0.0148414	0.109494	0.0423396	0.0335771	0.0641413	0.029031	0.0465862	0.0804534	0.076152	0.0787749	0.115178	0.113504	0.115042					0.965931	0.927011	0.946471	1.07081	0.918973	0.99489				0.897171	0.932281	0.914726	1.04177	1.03746	1.04009	1.07649	1.07482	1.07635					41_Uracil-Pentane_1.50_dimer.out	41_Uracil-Pentane_1.50.xyz	-611.767	-609.066	-611.607	-609.029
0.212103	41_Uracil-Pentane_2.00_dimer.out	0.00214333	0.00593815	0.00189741	0.0139899	0.00476191	0.00461401	0.0056237	0.00670934	0.00616652	0.0158776	0.00132957	0.00875718	0.0231536	0.00633606	0.015016					0.214246	0.206165	0.210205	0.226093	0.207341	0.216717				0.206479	0.205393	0.205936	0.22798	0.213432	0.22086	0.235256	0.218439	0.227119					41_Uracil-Pentane_2.00_dimer.out	41_Uracil-Pentane_2.00.xyz	-611.766	-609.066	-611.606	-609.029
2.89976	42_Uracil-Cyclopentane_0.90_dimer.out	0.37081	0.131197	0.119806	1.02308	0.447081	0.288002	0.0568427	0.0759064	0.00953183	0.140495	0.158569	0.147901	0.0360599	0.0179829	0.0295114					3.27057	2.76856	3.01957	3.92284	2.45268	3.18776				2.84292	2.97567	2.90929	2.75927	2.74119	2.75186	2.93582	2.91774	2.92927					42_Uracil-Cyclopentane_0.90_dimer.out	42_Uracil-Cyclopentane_0.90.xyz	-610.561	-607.879	-610.403	-607.842
3.83639	42_Uracil-Cyclopentane_0.95_dimer.out	0.299675	0.11595	0.0918628	0.903313	0.330819	0.286247	0.0960898	0.0249252	0.0355823	0.116068	0.135263	0.124134	0.0311638	0.0135393	0.0246654					4.13606	3.72044	3.92825	4.7397	3.50557	4.12264				3.7403	3.86131	3.80081	3.72032	3.70113	3.71226	3.86755	3.84993	3.86105					42_Uracil-Cyclopentane_0.95_dimer.out	42_Uracil-Cyclopentane_0.95.xyz	-610.562	-607.884	-610.404	-607.847
4.01859	42_Uracil-Cyclopentane_1.00_dimer.out	0.32042	0.0122595	0.15408	0.866931	0.170262	0.348335	0.0378922	0.0913321	0.0267199	0.0811254	0.0841209	0.0811853	0.0355369	0.0314772	0.0357023					4.33901	4.00633	4.17267	4.88552	3.84833	4.36692				3.9807	4.10992	4.04531	3.93746	3.93447	3.9374	4.05413	4.05007	4.05429					42_Uracil-Cyclopentane_1.00_dimer.out	42_Uracil-Cyclopentane_1.00.xyz	-610.563	-607.887	-610.405	-607.85
3.82252	42_Uracil-Cyclopentane_1.05_dimer.out	0.263194	0.0133165	0.124939	0.721473	0.14855	0.286462	0.0372693	0.0753471	0.0190389	0.00701901	0.00127807	0.00420862	0.105032	0.0959644	0.102547					4.08571	3.8092	3.94746	4.54399	3.67397	4.10898				3.78525	3.89786	3.84156	3.82954	3.82124	3.82673	3.92755	3.91848	3.92506					42_Uracil-Cyclopentane_1.05_dimer.out	42_Uracil-Cyclopentane_1.05.xyz	-610.562	-607.889	-610.404	-607.852
3.45872	42_Uracil-Cyclopentane_1.10_dimer.out	0.192897	0.0348848	0.0790061	0.607647	0.129394	0.239126	0.0790272	0.0270786	0.0259743	0.0295539	0.0271359	0.029565	0.117722	0.11701	0.119207					3.65162	3.42383	3.53772	4.06636	3.32932	3.69784				3.37969	3.4858	3.43274	3.48827	3.48585	3.48828	3.57644	3.57573	3.57793					42_Uracil-Cyclopentane_1.10_dimer.out	42_Uracil-Cyclopentane_1.10.xyz	-610.562	-607.89	-610.403	-607.853
2.2488	42_Uracil-Cyclopentane_1.25_dimer.out	0.0680958	0.068739	0.000321583	0.346632	0.098918	0.123857	0.114522	0.0489525	0.0817373	0.109493	0.0894795	0.100487	0.173368	0.155679	0.16604					2.3169	2.18007	2.24848	2.59544	2.14989	2.37266				2.13428	2.19985	2.16707	2.3583	2.33828	2.34929	2.42217	2.40448	2.41484					42_Uracil-Cyclopentane_1.25_dimer.out	42_Uracil-Cyclopentane_1.25.xyz	-610.559	-607.891	-610.401	-607.854
1.00044	42_Uracil-Cyclopentane_1.50_dimer.out	0.0317988	0.0275238	0.0021375	0.142699	0.0415056	0.050597	0.0409115	0.0183569	0.0296342	0.117543	0.0804709	0.0997045	0.154895	0.118862	0.137942					1.03224	0.972921	1.00258	1.14314	0.958939	1.05104				0.959533	0.982088	0.97081	1.11799	1.08092	1.10015	1.15534	1.11931	1.13839					42_Uracil-Cyclopentane_1.50_dimer.out	42_Uracil-Cyclopentane_1.50.xyz	-610.557	-607.892	-610.399	-607.855
0.24558	42_Uracil-Cyclopentane_2.00_dimer.out	0.0116506	0.000953413	0.00630203	0.046375	0.0044388	0.0209681	0.0111159	0.00448873	0.00331357	0.0221538	0.0153672	0.0190153	0.0294026	0.0215182	0.0258638					0.257231	0.246533	0.251882	0.291955	0.241141	0.266548				0.234464	0.250069	0.242266	0.267734	0.260947	0.264595	0.274982	0.267098	0.271444					42_Uracil-Cyclopentane_2.00_dimer.out	42_Uracil-Cyclopentane_2.00.xyz	-610.556	-607.892	-610.397	-607.855
2.75624	43_Uracil-Neopentane_0.90_dimer.out	0.174604	0.206102	0.015749	0.650478	0.453787	0.0983456	0.137395	0.0437115	0.0905534	0.0488997	0.0832771	0.0646597	0.105344	0.0803169	0.0948919					2.93084	2.55013	2.74049	3.40671	2.30245	2.85458				2.61884	2.71252	2.66568	2.70734	2.67296	2.69158	2.86158	2.83655	2.85113					43_Uracil-Neopentane_0.90_dimer.out	43_Uracil-Neopentane_0.90.xyz	-611.776	-609.057	-611.617	-609.02
3.49966	43_Uracil-Neopentane_0.95_dimer.out	0.256864	0.0560652	0.1004	0.645883	0.26516	0.190362	0.00180994	0.0810244	0.0414172	0.0486665	0.0104521	0.0308599	0.17178	0.141848	0.158677					3.75653	3.4436	3.60006	4.14555	3.23451	3.69003				3.50147	3.58069	3.54108	3.54833	3.51012	3.53052	3.67144	3.64151	3.65834					43_Uracil-Neopentane_0.95_dimer.out	43_Uracil-Neopentane_0.95.xyz	-611.778	-609.061	-611.618	-609.024
3.61265	43_Uracil-Neopentane_1.00_dimer.out	0.170488	0.0802845	0.0451019	0.545088	0.218838	0.163125	0.0751119	0.0105559	0.032278	0.00908931	0.0102879	0.000575901	0.116086	0.106739	0.113061					3.78314	3.53236	3.65775	4.15774	3.39381	3.77577				3.53754	3.6232	3.58037	3.62174	3.60236	3.61322	3.72873	3.71939	3.72571					43_Uracil-Neopentane_1.00_dimer.out	43_Uracil-Neopentane_1.00.xyz	-611.778	-609.064	-611.618	-609.026
3.4152	43_Uracil-Neopentane_1.05_dimer.out	0.130199	0.0800277	0.0250856	0.464708	0.177291	0.143709	0.089117	0.0162589	0.0526879	0.0177129	0.0047125	0.00757462	0.11171	0.0980062	0.106375					3.5454	3.33517	3.44028	3.87991	3.23791	3.55891				3.32608	3.39894	3.36251	3.43291	3.41049	3.42277	3.52691	3.51321	3.52157					43_Uracil-Neopentane_1.05_dimer.out	43_Uracil-Neopentane_1.05.xyz	-611.777	-609.065	-611.618	-609.028
3.0833	43_Uracil-Neopentane_1.10_dimer.out	0.0906438	0.0818952	0.00437428	0.391034	0.149785	0.120625	0.106302	0.0373847	0.0718435	0.0193152	6.89083e-05	0.0106936	0.10443	0.0926337	0.0999605					3.17394	3.0014	3.08767	3.47433	2.93351	3.20392				2.97699	3.04591	3.01145	3.10261	3.08336	3.09399	3.18772	3.17593	3.18326					43_Uracil-Neopentane_1.10_dimer.out	43_Uracil-Neopentane_1.10.xyz	-611.777	-609.066	-611.617	-609.028
2.01329	43_Uracil-Neopentane_1.25_dimer.out	0.0269735	0.120258	0.0736158	0.166878	0.145498	0.01069	0.154069	0.10371	0.12889	0.0579349	0.0428175	0.0511529	0.112079	0.102621	0.108475					1.98632	1.89304	1.93968	2.18017	1.8678	2.02398				1.85922	1.90958	1.8844	2.07123	2.05611	2.06445	2.12537	2.11591	2.12177					43_Uracil-Neopentane_1.25_dimer.out	43_Uracil-Neopentane_1.25.xyz	-611.775	-609.067	-611.615	-609.029
0.912106	43_Uracil-Neopentane_1.50_dimer.out	0.002931	0.0344227	0.0157459	0.0842095	0.0549343	0.0146376	0.050358	0.0209746	0.0356663	0.07255	0.059746	0.0666446	0.0975703	0.0883506	0.093672					0.915037	0.877684	0.896361	0.996316	0.857172	0.926744				0.861748	0.891132	0.87644	0.984656	0.971852	0.978751	1.00968	1.00046	1.00578					43_Uracil-Neopentane_1.50_dimer.out	43_Uracil-Neopentane_1.50.xyz	-611.773	-609.067	-611.613	-609.029
0.228658	43_Uracil-Neopentane_2.00_dimer.out	0.00383932	0.00807963	0.00212015	0.020187	0.00814952	0.00601873	0.00687877	0.0080338	0.00745629	0.0223579	0.000696823	0.0117603	0.0262958	0.00304333	0.0150461					0.232497	0.220579	0.226538	0.248845	0.220509	0.234677				0.221779	0.220624	0.221202	0.251016	0.229355	0.240418	0.254954	0.231701	0.243704					43_Uracil-Neopentane_2.00_dimer.out	43_Uracil-Neopentane_2.00.xyz	-611.772	-609.066	-611.612	-609.029
1.59748	44_Ethene-Pentane_0.90_dimer.out	0.0873556	0.0769758	0.00518993	0.156849	0.293805	0.068478	0.0417937	0.0651846	0.0534891	0.0232869	0.0431081	0.0327417	0.0191332	0.00852395	0.0143638					1.68483	1.5205	1.60267	1.75433	1.30367	1.529				1.63927	1.66266	1.65097	1.57419	1.55437	1.56474	1.61661	1.606	1.61184					44_Ethene-Pentane_0.90_dimer.out	44_Ethene-Pentane_0.90.xyz	-275.922	-274.48	-275.848	-274.463
1.91823	44_Ethene-Pentane_0.95_dimer.out	0.0615199	0.078615	0.00854759	0.118267	0.24309	0.0624113	0.0243143	0.0292204	0.0267673	0.00227425	0.0386838	0.0200333	0.0365676	0.0109892	0.0242778					1.97975	1.83961	1.90968	2.0365	1.67514	1.85582				1.94254	1.94745	1.945	1.91595	1.87954	1.89819	1.9548	1.92922	1.94251					44_Ethene-Pentane_0.95_dimer.out	44_Ethene-Pentane_0.95.xyz	-275.923	-274.482	-275.849	-274.465
1.94265	44_Ethene-Pentane_1.00_dimer.out	0.0474361	0.0686227	0.0105933	0.113824	0.177442	0.0318088	0.00390981	0.00272284	0.00331633	0.013925	0.0569948	0.0350056	0.0165076	0.0171805	0.000195724					1.99009	1.87403	1.93206	2.05647	1.76521	1.91084				1.94656	1.94537	1.94597	1.92873	1.88566	1.90765	1.95916	1.92547	1.94285					44_Ethene-Pentane_1.00_dimer.out	44_Ethene-Pentane_1.00.xyz	-275.923	-274.483	-275.849	-274.466
1.82187	44_Ethene-Pentane_1.05_dimer.out	0.0443731	0.0462775	0.000952199	0.103758	0.138569	0.0174053	0.00543817	0.0142319	0.00983504	0.00268437	0.0240182	0.0102784	0.0251981	0.00619324	0.0161562					1.86624	1.77559	1.82091	1.92563	1.6833	1.80446				1.82731	1.8361	1.8317	1.82455	1.79785	1.81159	1.84707	1.82806	1.83802					44_Ethene-Pentane_1.05_dimer.out	44_Ethene-Pentane_1.05.xyz	-275.922	-274.484	-275.849	-274.467
1.63925	44_Ethene-Pentane_1.10_dimer.out	0.0176597	0.0611501	0.0217452	0.0699183	0.133983	0.0320324	0.0166028	0.0133982	0.0150005	0.00486524	0.0198141	0.00716273	0.0269849	0.00873028	0.01823					1.65691	1.5781	1.6175	1.70917	1.50526	1.60722				1.62265	1.62585	1.62425	1.64411	1.61943	1.63209	1.66623	1.64798	1.65748					44_Ethene-Pentane_1.10_dimer.out	44_Ethene-Pentane_1.10.xyz	-275.922	-274.485	-275.848	-274.468
1.06878	44_Ethene-Pentane_1.25_dimer.out	0.0578171	0.0985427	0.0781799	0.00107498	0.112236	0.0566556	0.0950192	0.0895648	0.092292	0.000857407	0.0213206	0.0107787	0.00995678	0.00533466	0.00270871					1.01096	0.970237	0.990599	1.0677	0.956543	1.01212				0.97376	0.979214	0.976487	1.06792	1.04746	1.058	1.07874	1.06344	1.07149					44_Ethene-Pentane_1.25_dimer.out	44_Ethene-Pentane_1.25.xyz	-275.921	-274.485	-275.847	-274.469
0.481353	44_Ethene-Pentane_1.50_dimer.out	0.00801063	0.0250076	0.0165091	0.00306553	0.0359699	0.0164522	0.0152725	0.0178204	0.0165465	0.0497104	0.0306101	0.0403597	0.0561807	0.0390245	0.0478811					0.473342	0.456345	0.464843	0.484418	0.445383	0.4649				0.46608	0.463532	0.464806	0.531063	0.511963	0.521712	0.537533	0.520377	0.529234					44_Ethene-Pentane_1.50_dimer.out	44_Ethene-Pentane_1.50.xyz	-275.92	-274.486	-275.846	-274.469
0.117369	44_Ethene-Pentane_2.00_dimer.out	0.000845248	0.000124402	0.000484825	0.00118073	0.00855954	0.0036894	0.000625293	0.00581789	0.00322159	0.0168461	0.0168093	0.0168895	0.0211537	0.0215382	0.0214358					0.118214	0.117493	0.117853	0.118549	0.108809	0.113679				0.117994	0.123186	0.12059	0.134215	0.134178	0.134258	0.138522	0.138907	0.138804					44_Ethene-Pentane_2.00_dimer.out	44_Ethene-Pentane_2.00.xyz	-275.92	-274.486	-275.846	-274.469
0.991646	45_Ethyne-Pentane_0.90_dimer.out	0.246384	0.0752814	0.160833	0.365629	0.135963	0.114833	0.168204	0.21378	0.190992	0.0255039	0.0218378	0.0241713	0.0676929	0.057995	0.063676					1.23803	1.06693	1.15248	1.35728	0.855684	1.10648				1.15985	1.20543	1.18264	1.01715	1.01348	1.01582	1.05934	1.04964	1.05532					45_Ethyne-Pentane_0.90_dimer.out	45_Ethyne-Pentane_0.90.xyz	-274.669	-273.263	-274.597	-273.246
1.50954	45_Ethyne-Pentane_0.95_dimer.out	0.192044	0.0559871	0.124016	0.335562	0.0698913	0.132835	0.097949	0.138517	0.118233	0.0260045	0.0314499	0.028257	0.00911518	0.000826542	0.00570631					1.70158	1.56553	1.63356	1.8451	1.43965	1.64238				1.60749	1.64806	1.62777	1.48354	1.47809	1.48128	1.51866	1.51037	1.51525					45_Ethyne-Pentane_0.95_dimer.out	45_Ethyne-Pentane_0.95.xyz	-274.67	-273.266	-274.597	-273.249
1.64553	45_Ethyne-Pentane_1.00_dimer.out	0.201103	0.0943	0.147702	0.312456	0.014769	0.148843	0.128097	0.165809	0.146953	0.0243374	0.0206181	0.0229034	0.0509505	0.0460959	0.0491641					1.84663	1.73983	1.79323	1.95798	1.63076	1.79437				1.77363	1.81134	1.79248	1.66987	1.66615	1.66843	1.69648	1.69162	1.69469					45_Ethyne-Pentane_1.00_dimer.out	45_Ethyne-Pentane_1.00.xyz	-274.67	-273.267	-274.598	-273.251
1.5887	45_Ethyne-Pentane_1.05_dimer.out	0.144808	0.0607351	0.102772	0.257419	0.0173401	0.120039	0.0709769	0.111924	0.0914504	0.0137535	0.0228077	0.0186145	0.0315271	0.0408641	0.0366822					1.7335	1.64943	1.69147	1.84611	1.57136	1.70873				1.65967	1.70062	1.68015	1.60245	1.6115	1.60731	1.62022	1.62956	1.62538					45_Ethyne-Pentane_1.05_dimer.out	45_Ethyne-Pentane_1.05.xyz	-274.67	-273.268	-274.597	-273.252
1.44438	45_Ethyne-Pentane_1.10_dimer.out	0.140686	0.0736337	0.10716	0.231886	0.00917296	0.120529	0.0808919	0.115896	0.0983942	0.0126163	0.0205159	0.0168444	0.0288292	0.0352423	0.0324661					1.58506	1.51801	1.55154	1.67626	1.45355	1.56491				1.52527	1.56027	1.54277	1.45699	1.46489	1.46122	1.47321	1.47962	1.47684					45_Ethyne-Pentane_1.10_dimer.out	45_Ethyne-Pentane_1.10.xyz	-274.67	-273.269	-274.597	-273.252
0.932426	45_Ethyne-Pentane_1.25_dimer.out	0.0405082	0.00565557	0.0230819	0.110425	0.0149107	0.0477573	0.00533186	0.0191395	0.00690383	0.0368254	0.036284	0.0368407	0.0444356	0.0435914	0.0444519					0.972935	0.938082	0.955508	1.04285	0.917516	0.980184				0.927095	0.951566	0.93933	0.969252	0.96871	0.969267	0.976862	0.976018	0.976878					45_Ethyne-Pentane_1.25_dimer.out	45_Ethyne-Pentane_1.25.xyz	-274.669	-273.27	-274.596	-273.253
0.400234	45_Ethyne-Pentane_1.50_dimer.out	0.0302451	0.0144731	0.0223591	0.0446827	0.00328829	0.0239855	0.0207793	0.0218063	0.0212928	0.0725662	0.05978	0.0663389	0.0783414	0.0665608	0.0726923					0.430479	0.414707	0.422593	0.444916	0.403522	0.424219				0.421013	0.42204	0.421526	0.4728	0.460014	0.466573	0.478575	0.466794	0.472926					45_Ethyne-Pentane_1.50_dimer.out	45_Ethyne-Pentane_1.50.xyz	-274.668	-273.27	-274.595	-273.253
0.0916728	45_Ethyne-Pentane_2.00_dimer.out	0.00940097	0.00651315	0.00795706	0.00609194	0.00157981	0.00383588	0.0115705	0.00974761	0.010659	0.0239752	0.0187968	0.0214263	0.0266267	0.0220932	0.0244127					0.101074	0.0981859	0.0996299	0.0977647	0.0932526	0.0955087				0.103243	0.10142	0.102332	0.115648	0.11047	0.113099	0.118299	0.113766	0.116086					45_Ethyne-Pentane_2.00_dimer.out	45_Ethyne-Pentane_2.00.xyz	-274.667	-273.27	-274.595	-273.253
3.65478	46_Peptide-Pentane_0.90_dimer.out	0.030796	0.316652	0.142928	0.383978	0.639363	0.127692	0.200762	0.105071	0.152917	0.178216	0.17682	0.176478	0.0257241	0.0204687	0.021532					3.68558	3.33813	3.51185	4.03876	3.01542	3.52709				3.45402	3.54971	3.50186	3.47656	3.47796	3.4783	3.62906	3.63431	3.63325					46_Peptide-Pentane_0.90_dimer.out	46_Peptide-Pentane_0.90.xyz	-445.667	-443.525	-445.548	-443.498
4.115	46_Peptide-Pentane_0.95_dimer.out	0.0168841	0.282141	0.132629	0.330547	0.546155	0.107804	0.188764	0.109045	0.148904	0.147553	0.151803	0.148746	0.0205974	0.0217751	0.0197799					4.13189	3.83286	3.98237	4.44555	3.56885	4.0072				3.92624	4.00596	3.9661	3.96745	3.9632	3.96626	4.09441	4.09323	4.09522					46_Peptide-Pentane_0.95_dimer.out	46_Peptide-Pentane_0.95.xyz	-445.668	-443.528	-445.549	-443.501
4.16179	46_Peptide-Pentane_1.00_dimer.out	0.0315428	0.225369	0.0969131	0.346263	0.400015	0.0268758	0.174799	0.110865	0.142832	0.148508	0.16187	0.154334	0.0419223	0.0528502	0.0460985					4.19333	3.93642	4.06488	4.50805	3.76178	4.13492				3.98699	4.05093	4.01896	4.01328	3.99992	4.00746	4.11987	4.10894	4.11569					46_Peptide-Pentane_1.00_dimer.out	46_Peptide-Pentane_1.00.xyz	-445.668	-443.531	-445.549	-443.503
3.97387	46_Peptide-Pentane_1.05_dimer.out	0.0214536	0.195788	0.0871674	0.294191	0.34523	0.0255195	0.157362	0.0978094	0.127586	0.105797	0.116019	0.110129	0.0203179	0.0293608	0.0236502					3.99533	3.77808	3.8867	4.26806	3.62864	3.94835				3.81651	3.87606	3.84629	3.86807	3.85785	3.86374	3.95355	3.94451	3.95022					46_Peptide-Pentane_1.05_dimer.out	46_Peptide-Pentane_1.05.xyz	-445.667	-443.532	-445.549	-443.505
3.66489	46_Peptide-Pentane_1.10_dimer.out	0.0224339	0.159926	0.0687462	0.261636	0.278567	0.00846574	0.134395	0.082141	0.108268	0.0630725	0.0758749	0.0687406	0.0128165	0.00360026	0.00928861					3.68733	3.50497	3.59615	3.92653	3.38633	3.65643				3.5305	3.58275	3.55663	3.60182	3.58902	3.59615	3.67771	3.66849	3.67418					46_Peptide-Pentane_1.10_dimer.out	46_Peptide-Pentane_1.10.xyz	-445.667	-443.533	-445.548	-443.505
2.58551	46_Peptide-Pentane_1.25_dimer.out	0.0568951	0.169425	0.11316	0.0984868	0.250842	0.0761774	0.158769	0.116046	0.137407	0.0435703	0.0364703	0.0406226	0.0907878	0.0893743	0.0909427					2.52862	2.41609	2.47235	2.684	2.33467	2.50933				2.42674	2.46946	2.4481	2.62908	2.62198	2.62613	2.6763	2.67488	2.67645					46_Peptide-Pentane_1.25_dimer.out	46_Peptide-Pentane_1.25.xyz	-445.665	-443.534	-445.546	-443.507
1.17157	46_Peptide-Pentane_1.50_dimer.out	0.0387598	0.08282	0.0607899	0.0343498	0.101263	0.0334566	0.086693	0.070728	0.0787105	0.0526254	0.0275586	0.0405805	0.0751986	0.051933	0.0642959					1.13281	1.08875	1.11078	1.20592	1.07031	1.13811				1.08488	1.10084	1.09286	1.22419	1.19913	1.21215	1.24677	1.2235	1.23586					46_Peptide-Pentane_1.50_dimer.out	46_Peptide-Pentane_1.50.xyz	-445.663	-443.534	-445.544	-443.507
0.282057	46_Peptide-Pentane_2.00_dimer.out	0.00372743	0.0100818	0.00317721	0.0115088	0.0101285	0.000690158	0.00137433	0.0100512	0.00571278	0.031471	0.00478034	0.0183323	0.0405328	0.0137936	0.0274798					0.285784	0.271975	0.27888	0.293566	0.271929	0.282747				0.280683	0.272006	0.276344	0.313528	0.286837	0.300389	0.32259	0.295851	0.309537					46_Peptide-Pentane_2.00_dimer.out	46_Peptide-Pentane_2.00.xyz	-445.661	-443.534	-445.542	-443.507
1.49324	47_Benzene-Benzene_TS_0.90_dimer.out	0.550253	0.200348	0.375301	1.03335	0.0605445	0.486403	0.233518	0.371399	0.302458	0.0393987	0.0549427	0.0484585	0.118862	0.122977	0.12301					2.04349	1.69358	1.86854	2.52659	1.43269	1.97964				1.72675	1.86463	1.79569	1.53263	1.54818	1.54169	1.6121	1.61621	1.61625					47_Benzene-Benzene_TS_0.90_dimer.out	47_Benzene-Benzene_TS_0.90.xyz	-463.756	-461.58	-463.638	-461.553
2.45197	47_Benzene-Benzene_TS_0.95_dimer.out	0.545589	0.259537	0.402563	0.97491	0.0591439	0.517027	0.264112	0.390921	0.327517	0.102081	0.120476	0.112423	0.16947	0.180393	0.176745					2.99756	2.71151	2.85453	3.42688	2.51112	2.969				2.71608	2.84289	2.77949	2.55405	2.57245	2.56439	2.62144	2.63236	2.62872					47_Benzene-Benzene_TS_0.95_dimer.out	47_Benzene-Benzene_TS_0.95.xyz	-463.757	-461.584	-463.64	-461.557
2.76169	47_Benzene-Benzene_TS_1.00_dimer.out	0.521153	0.281918	0.401536	0.902583	0.129308	0.515946	0.271075	0.381974	0.326525	0.12729	0.139173	0.134278	0.183949	0.18881	0.188039					3.28284	3.04361	3.16322	3.66427	2.891	3.27763				3.03276	3.14366	3.08821	2.88898	2.90086	2.89597	2.94564	2.9505	2.94973					47_Benzene-Benzene_TS_1.00_dimer.out	47_Benzene-Benzene_TS_1.00.xyz	-463.758	-461.586	-463.64	-461.56
2.73088	47_Benzene-Benzene_TS_1.05_dimer.out	0.442471	0.248239	0.345355	0.814046	0.159524	0.486785	0.198853	0.306403	0.252628	0.0631032	0.0876679	0.076258	0.113885	0.132935	0.124788					3.17335	2.97912	3.07623	3.54492	2.8904	3.21766				2.92973	3.03728	2.98351	2.79398	2.81854	2.80713	2.84476	2.86381	2.85566					47_Benzene-Benzene_TS_1.05_dimer.out	47_Benzene-Benzene_TS_1.05.xyz	-463.758	-461.588	-463.64	-461.561
2.53572	47_Benzene-Benzene_TS_1.10_dimer.out	0.339974	0.188898	0.264436	0.673549	0.125199	0.399374	0.12127	0.230662	0.175966	0.0645209	0.096001	0.0810996	0.106396	0.136801	0.122865					2.87569	2.72462	2.80016	3.20927	2.66092	2.9351				2.65699	2.76638	2.71169	2.60024	2.63172	2.61682	2.64212	2.67252	2.65859					47_Benzene-Benzene_TS_1.10_dimer.out	47_Benzene-Benzene_TS_1.10.xyz	-463.757	-461.588	-463.639	-461.562
1.73413	47_Benzene-Benzene_TS_1.25_dimer.out	0.170618	0.0797432	0.125181	0.388196	0.0502791	0.219238	0.0279661	0.0990609	0.0635135	0.117486	0.128969	0.123906	0.146593	0.159534	0.154073					1.90475	1.81388	1.85931	2.12233	1.78441	1.95337				1.7621	1.83319	1.79765	1.85162	1.8631	1.85804	1.88073	1.89367	1.88821					47_Benzene-Benzene_TS_1.25_dimer.out	47_Benzene-Benzene_TS_1.25.xyz	-463.756	-461.589	-463.638	-461.563
0.817747	47_Benzene-Benzene_TS_1.50_dimer.out	0.0699977	0.0288797	0.0494387	0.166505	0.0221585	0.0943317	0.00672437	0.0332863	0.0200053	0.123176	0.111796	0.117934	0.143935	0.13441	0.139837					0.887744	0.846626	0.867185	0.984251	0.839905	0.912078				0.824471	0.851033	0.837752	0.940923	0.929542	0.935681	0.961682	0.952156	0.957584					47_Benzene-Benzene_TS_1.50_dimer.out	47_Benzene-Benzene_TS_1.50.xyz	-463.754	-461.589	-463.636	-461.563
0.222016	47_Benzene-Benzene_TS_2.00_dimer.out	0.0215434	0.0122497	0.0168965	0.0531776	0.00862046	0.030899	0.000802953	0.0146291	0.00771603	0.0320365	0.0330105	0.0326731	0.0411361	0.0419548	0.0417795					0.24356	0.234266	0.238913	0.275194	0.230637	0.252915				0.222819	0.236645	0.229732	0.254053	0.255027	0.254689	0.263152	0.263971	0.263796					47_Benzene-Benzene_TS_2.00_dimer.out	47_Benzene-Benzene_TS_2.00.xyz	-463.753	-461.589	-463.635	-461.563
2.40152	48_Pyridine-Pyridine_TS_0.90_dimer.out	0.420112	0.0949927	0.257552	0.850025	0.159092	0.345467	0.138246	0.261579	0.199912	0.0334955	0.00693015	0.0191992	0.0530262	0.0846234	0.0702545					2.82163	2.49651	2.65907	3.25155	2.24243	2.74699				2.53977	2.6631	2.60143	2.36803	2.39459	2.38232	2.45455	2.48614	2.47178					48_Pyridine-Pyridine_TS_0.90_dimer.out	48_Pyridine-Pyridine_TS_0.90.xyz	-495.82	-493.578	-495.696	-493.55
3.19871	48_Pyridine-Pyridine_TS_0.95_dimer.out	0.435296	0.163288	0.299292	0.8274	0.0269987	0.400201	0.178218	0.288047	0.233133	0.00411204	0.0181069	0.00790767	0.0646377	0.0888759	0.0780704					3.634	3.362	3.498	4.02611	3.17171	3.59891				3.37693	3.48676	3.43184	3.1946	3.21682	3.20662	3.26335	3.28758	3.27678					48_Pyridine-Pyridine_TS_0.95_dimer.out	48_Pyridine-Pyridine_TS_0.95.xyz	-495.822	-493.582	-495.697	-493.554
3.43979	48_Pyridine-Pyridine_TS_1.00_dimer.out	0.377028	0.145606	0.261317	0.763963	0.043568	0.403765	0.12334	0.212505	0.167923	0.0296977	0.0205148	0.0242716	0.0328488	0.0433139	0.0392975					3.81682	3.5854	3.70111	4.20375	3.48336	3.84356				3.56313	3.6523	3.60771	3.41009	3.41928	3.41552	3.47264	3.4831	3.47909					48_Pyridine-Pyridine_TS_1.00_dimer.out	48_Pyridine-Pyridine_TS_1.00.xyz	-495.822	-493.584	-495.698	-493.556
3.37507	48_Pyridine-Pyridine_TS_1.05_dimer.out	0.381595	0.188501	0.285048	0.697887	0.0858779	0.391883	0.174223	0.255784	0.215003	0.0473636	0.0630401	0.0558892	0.10166	0.120019	0.111816					3.75667	3.56358	3.66012	4.07296	3.46095	3.76696				3.5493	3.63086	3.59008	3.42244	3.43811	3.43096	3.47673	3.49509	3.48689					48_Pyridine-Pyridine_TS_1.05_dimer.out	48_Pyridine-Pyridine_TS_1.05.xyz	-495.822	-493.585	-495.697	-493.557
3.15369	48_Pyridine-Pyridine_TS_1.10_dimer.out	0.315237	0.149752	0.232494	0.598562	0.0683924	0.333477	0.129479	0.203094	0.166287	0.0542443	0.0718773	0.0636539	0.103945	0.122942	0.11431					3.46893	3.30344	3.38619	3.75225	3.22209	3.48717				3.28317	3.35679	3.31998	3.20794	3.22557	3.21735	3.25764	3.27663	3.268					48_Pyridine-Pyridine_TS_1.10_dimer.out	48_Pyridine-Pyridine_TS_1.10.xyz	-495.822	-493.586	-495.697	-493.558
2.25925	48_Pyridine-Pyridine_TS_1.25_dimer.out	0.159187	0.0571682	0.108178	0.356899	0.00985152	0.183375	0.0295609	0.0881906	0.0588758	0.0949849	0.121272	0.108501	0.127146	0.158583	0.143362					2.41843	2.31641	2.36742	2.61614	2.2691	2.44262				2.28881	2.34744	2.31812	2.35423	2.38052	2.36775	2.38639	2.41783	2.40261					48_Pyridine-Pyridine_TS_1.25_dimer.out	48_Pyridine-Pyridine_TS_1.25.xyz	-495.82	-493.587	-495.695	-493.558
1.16835	48_Pyridine-Pyridine_TS_1.50_dimer.out	0.0607558	0.0118214	0.0362886	0.184925	0.000193271	0.0923657	0.0206537	0.0196986	0.000477538	0.0641102	0.0857578	0.0751625	0.0833567	0.109279	0.0966132					1.2291	1.18017	1.20463	1.35327	1.16815	1.26071				1.14769	1.18804	1.16787	1.23246	1.2541	1.24351	1.2517	1.27763	1.26496					48_Pyridine-Pyridine_TS_1.50_dimer.out	48_Pyridine-Pyridine_TS_1.50.xyz	-495.818	-493.586	-495.693	-493.558
0.370157	48_Pyridine-Pyridine_TS_2.00_dimer.out	0.0272228	0.00814826	0.0176855	0.0724753	0.00763217	0.0400537	0.00244628	0.00848662	0.00302017	0.0228498	0.0289195	0.025945	0.0311436	0.0381339	0.0347225					0.39738	0.378306	0.387843	0.442633	0.37779	0.410211				0.367711	0.378644	0.373178	0.393007	0.399077	0.396102	0.401301	0.408291	0.40488					48_Pyridine-Pyridine_TS_2.00_dimer.out	48_Pyridine-Pyridine_TS_2.00.xyz	-495.817	-493.586	-495.692	-493.558
1.94501	49_Benzene-Pyridine_TS_0.90_dimer.out	0.453569	0.100609	0.277089	1.01275	0.0931894	0.459781	0.0869498	0.22767	0.15731	0.0991926	0.0616728	0.0793526	0.0151231	0.0158398	0.00206882					2.39858	2.04562	2.2221	2.95777	1.85183	2.4048				2.03196	2.17268	2.10232	1.84582	1.88334	1.86566	1.92989	1.96085	1.94708					49_Benzene-Pyridine_TS_0.90_dimer.out	49_Benzene-Pyridine_TS_0.90.xyz	-479.788	-477.579	-479.667	-477.552
2.92164	49_Benzene-Pyridine_TS_0.95_dimer.out	0.502599	0.209517	0.356058	0.96047	0.0295963	0.495033	0.202402	0.32748	0.264941	0.00544506	0.0316597	0.0140145	0.0663097	0.0987197	0.083929					3.42424	3.13116	3.2777	3.88211	2.95124	3.41667				3.12404	3.24912	3.18658	2.9162	2.9533	2.93566	2.98795	3.02036	3.00557					49_Benzene-Pyridine_TS_0.95_dimer.out	49_Benzene-Pyridine_TS_0.95.xyz	-479.79	-477.583	-479.669	-477.556
3.2258	49_Benzene-Pyridine_TS_1.00_dimer.out	0.497076	0.252602	0.374839	0.851147	0.0639623	0.457555	0.264935	0.37628	0.320607	0.0953743	0.130203	0.113581	0.15467	0.184771	0.170966					3.72287	3.4784	3.60063	4.07694	3.28976	3.68335				3.49073	3.60208	3.5464	3.32117	3.356	3.33938	3.38047	3.41057	3.39676					49_Benzene-Pyridine_TS_1.00_dimer.out	49_Benzene-Pyridine_TS_1.00.xyz	-479.79	-477.585	-479.669	-477.558
3.17573	49_Benzene-Pyridine_TS_1.05_dimer.out	0.374281	0.175165	0.274723	0.752681	0.0927478	0.422715	0.126189	0.2292	0.177695	0.00419558	0.0251422	0.0112451	0.0489537	0.0753597	0.063347					3.55001	3.35089	3.45045	3.92841	3.26847	3.59844				3.30192	3.40493	3.35342	3.17153	3.20087	3.18697	3.22468	3.25109	3.23907					49_Benzene-Pyridine_TS_1.05_dimer.out	49_Benzene-Pyridine_TS_1.05.xyz	-479.79	-477.587	-479.669	-477.56
2.95491	49_Benzene-Pyridine_TS_1.10_dimer.out	0.336881	0.172799	0.25484	0.657325	0.0938696	0.375597	0.126787	0.224547	0.175667	0.0652353	0.104913	0.0856938	0.108531	0.15111	0.1307					3.29179	3.12771	3.20975	3.61224	3.04878	3.33051				3.0817	3.17946	3.13058	3.02015	3.05983	3.04061	3.06344	3.10602	3.08561					49_Benzene-Pyridine_TS_1.10_dimer.out	49_Benzene-Pyridine_TS_1.10.xyz	-479.79	-477.588	-479.668	-477.56
2.06781	49_Benzene-Pyridine_TS_1.25_dimer.out	0.159641	0.0615608	0.110601	0.388096	0.0345285	0.211312	0.00985824	0.0792842	0.0445712	0.0620798	0.0881337	0.0755968	0.0951907	0.125265	0.110914					2.22745	2.12937	2.17841	2.45591	2.10234	2.27912				2.07767	2.14709	2.11238	2.12989	2.15594	2.14341	2.163	2.19307	2.17872					49_Benzene-Pyridine_TS_1.25_dimer.out	49_Benzene-Pyridine_TS_1.25.xyz	-479.788	-477.588	-479.667	-477.561
1.04165	49_Benzene-Pyridine_TS_1.50_dimer.out	0.0658955	0.0180391	0.0419673	0.174333	0.0133112	0.093822	0.00519979	0.021139	0.00796959	0.0814646	0.0847585	0.0833882	0.102583	0.111125	0.107206					1.10755	1.05969	1.08362	1.21598	1.05496	1.13547				1.03645	1.06279	1.04962	1.12312	1.12641	1.12504	1.14423	1.15278	1.14886					49_Benzene-Pyridine_TS_1.50_dimer.out	49_Benzene-Pyridine_TS_1.50.xyz	-479.786	-477.588	-479.665	-477.561
0.331789	49_Benzene-Pyridine_TS_2.00_dimer.out	0.0224512	0.00654896	0.0145001	0.0488608	0.00932041	0.0290906	0.00513615	0.00473189	0.00493402	0.0294641	0.0214763	0.0255601	0.0380503	0.0320814	0.0351754					0.35424	0.338338	0.346289	0.38065	0.341109	0.360879				0.336925	0.336521	0.336723	0.361253	0.353265	0.357349	0.369839	0.36387	0.366964					49_Benzene-Pyridine_TS_2.00_dimer.out	49_Benzene-Pyridine_TS_2.00.xyz	-479.785	-477.588	-479.663	-477.56
1.79084	50_Benzene-Ethyne_CH-pi_0.90_dimer.out	0.278578	0.0249831	0.151781	0.663508	0.199709	0.2319	0.0262046	0.172299	0.0992518	0.119157	0.00569103	0.0621064	0.0754079	0.0334947	0.0204171					2.06942	1.81582	1.94262	2.45435	1.59113	2.02274				1.81704	1.96314	1.89009	1.67168	1.78515	1.72873	1.71543	1.82433	1.77042					50_Benzene-Ethyne_CH-pi_0.90_dimer.out	50_Benzene-Ethyne_CH-pi_0.90.xyz	-309.091	-307.643	-309.013	-307.626
2.58043	50_Benzene-Ethyne_CH-pi_0.95_dimer.out	0.399174	0.190138	0.294656	0.735571	0.0127441	0.374158	0.17862	0.306443	0.242531	0.0785993	0.00940294	0.0342327	0.0406642	0.0419156	0.00122482					2.97961	2.77057	2.87509	3.316	2.59318	2.95459				2.75905	2.88687	2.82296	2.50183	2.58983	2.5462	2.53977	2.62235	2.58166					50_Benzene-Ethyne_CH-pi_0.95_dimer.out	50_Benzene-Ethyne_CH-pi_0.95.xyz	-309.092	-307.646	-309.014	-307.629
2.80969	50_Benzene-Ethyne_CH-pi_1.00_dimer.out	0.329885	0.160865	0.245375	0.620086	0.0217641	0.320925	0.139619	0.252064	0.195842	0.0640918	0.00700445	0.0281466	0.0278269	0.0394092	0.00642072					3.13957	2.97055	3.05506	3.42977	2.83145	3.13061				2.94931	3.06175	3.00553	2.7456	2.81669	2.78154	2.78186	2.8491	2.81611					50_Benzene-Ethyne_CH-pi_1.00_dimer.out	50_Benzene-Ethyne_CH-pi_1.00.xyz	-309.092	-307.648	-309.014	-307.63
2.74707	50_Benzene-Ethyne_CH-pi_1.05_dimer.out	0.356466	0.21532	0.285893	0.607419	0.111495	0.359457	0.191933	0.283391	0.237662	0.0470438	0.00165664	0.0222909	0.0165052	0.026874	0.00583574					3.10354	2.96239	3.03296	3.35449	2.85856	3.10653				2.939	3.03046	2.98473	2.70003	2.74873	2.72478	2.73056	2.77394	2.7529					50_Benzene-Ethyne_CH-pi_1.05_dimer.out	50_Benzene-Ethyne_CH-pi_1.05.xyz	-309.092	-307.649	-309.014	-307.631
2.54513	50_Benzene-Ethyne_CH-pi_1.10_dimer.out	0.291943	0.174189	0.233066	0.508724	0.0928505	0.300787	0.149814	0.227518	0.188666	0.0383263	0.00203554	0.017788	0.0210103	0.014325	0.00276096					2.83708	2.71932	2.7782	3.05386	2.63798	2.84592				2.69495	2.77265	2.7338	2.50681	2.54717	2.52735	2.52412	2.55946	2.54237					50_Benzene-Ethyne_CH-pi_1.10_dimer.out	50_Benzene-Ethyne_CH-pi_1.10.xyz	-309.092	-307.649	-309.014	-307.632
1.7721	50_Benzene-Ethyne_CH-pi_1.25_dimer.out	0.143177	0.0730904	0.108134	0.299936	0.0494474	0.174692	0.0403999	0.0885916	0.0644957	0.0255849	0.0482444	0.0371905	0.0335009	0.0552971	0.0448209					1.91527	1.84519	1.88023	2.07203	1.82155	1.94679				1.8125	1.86069	1.83659	1.79768	1.82034	1.80929	1.8056	1.8274	1.81692					50_Benzene-Ethyne_CH-pi_1.25_dimer.out	50_Benzene-Ethyne_CH-pi_1.25.xyz	-309.09	-307.649	-309.012	-307.632
0.88985	50_Benzene-Ethyne_CH-pi_1.50_dimer.out	0.0465956	0.0161701	0.0313828	0.11082	0.011512	0.0611658	0.00448811	0.0192241	0.0118561	0.0597974	0.0560849	0.0581588	0.0700289	0.0662957	0.0684996					0.936446	0.90602	0.921233	1.00067	0.901362	0.951016				0.894338	0.909074	0.901706	0.949648	0.945935	0.948009	0.959879	0.956146	0.95835					50_Benzene-Ethyne_CH-pi_1.50_dimer.out	50_Benzene-Ethyne_CH-pi_1.50.xyz	-309.089	-307.649	-309.01	-307.631
0.27212	50_Benzene-Ethyne_CH-pi_2.00_dimer.out	0.0152723	0.00595421	0.0106132	0.0307691	0.00322905	0.0169991	0.00511199	0.00774092	0.00642645	0.0176297	0.016014	0.0168718	0.0231647	0.0206546	0.0220034					0.287392	0.278074	0.282733	0.302889	0.275349	0.289119				0.277232	0.279861	0.278546	0.28975	0.288134	0.288992	0.295285	0.292775	0.294123					50_Benzene-Ethyne_CH-pi_2.00_dimer.out	50_Benzene-Ethyne_CH-pi_2.00.xyz	-309.088	-307.648	-309.009	-307.63
1.16975	51_Ethyne-Ethyne_TS_0.90_dimer.out	0.0645009	0.0156133	0.0244438	0.122613	0.147862	0.0126246	0.0264008	0.0710933	0.0487471	0.00705709	0.0446293	0.0259159	0.0294045	0.0662052	0.047934					1.23426	1.15414	1.1942	1.29237	1.02189	1.15713				1.19616	1.24085	1.2185	1.17681	1.21438	1.19567	1.19916	1.23596	1.21769					51_Ethyne-Ethyne_TS_0.90_dimer.out	51_Ethyne-Ethyne_TS_0.90.xyz	-154.424	-153.706	-154.385	-153.697
1.43404	51_Ethyne-Ethyne_TS_0.95_dimer.out	0.0643136	0.00306107	0.0306263	0.111323	0.114466	0.00157167	0.0334929	0.0699797	0.0517363	0.0209373	0.0515727	0.0363157	0.0383181	0.0694278	0.0539626					1.49835	1.43097	1.46466	1.54536	1.31957	1.43246				1.46753	1.50402	1.48577	1.45497	1.48561	1.47035	1.47235	1.50346	1.488					51_Ethyne-Ethyne_TS_0.95_dimer.out	51_Ethyne-Ethyne_TS_0.95.xyz	-154.424	-153.707	-154.386	-153.698
1.48941	51_Ethyne-Ethyne_TS_1.00_dimer.out	0.0594843	0.00344829	0.0314663	0.10748	0.0808312	0.0133244	0.0280168	0.0587048	0.0433608	0.0139534	0.0367854	0.0254517	0.0250763	0.0468554	0.0361079					1.54889	1.49286	1.52087	1.59689	1.40858	1.50273				1.51742	1.54811	1.53277	1.50336	1.52619	1.51486	1.51448	1.53626	1.52552					51_Ethyne-Ethyne_TS_1.00_dimer.out	51_Ethyne-Ethyne_TS_1.00.xyz	-154.424	-153.708	-154.386	-153.699
1.43134	51_Ethyne-Ethyne_TS_1.05_dimer.out	0.0717251	0.0213413	0.0465332	0.130427	0.0298185	0.0503042	0.0332381	0.0548835	0.0440608	0.0066207	0.00823018	0.000868212	0.00121326	0.0142252	0.00783941					1.50307	1.45268	1.47788	1.56177	1.40152	1.48165				1.46458	1.48623	1.4754	1.42472	1.43957	1.43221	1.43256	1.44557	1.43918					51_Ethyne-Ethyne_TS_1.05_dimer.out	51_Ethyne-Ethyne_TS_1.05.xyz	-154.424	-153.708	-154.386	-153.699
1.31762	51_Ethyne-Ethyne_TS_1.10_dimer.out	0.0704101	0.0312673	0.0508387	0.109295	0.0288346	0.04023	0.0449161	0.0706721	0.0577941	0.0191365	0.0399624	0.0295964	0.0257262	0.0452852	0.0355943					1.38803	1.34888	1.36846	1.42691	1.28878	1.35785				1.36253	1.38829	1.37541	1.33675	1.35758	1.34721	1.34334	1.3629	1.35321					51_Ethyne-Ethyne_TS_1.10_dimer.out	51_Ethyne-Ethyne_TS_1.10.xyz	-154.424	-153.708	-154.385	-153.699
0.913488	51_Ethyne-Ethyne_TS_1.25_dimer.out	0.0411287	0.0194449	0.0302868	0.0805779	0.00466216	0.0379579	0.0152645	0.0352503	0.0252574	0.0165806	0.03162	0.0241549	0.0208582	0.0347419	0.0279019					0.954617	0.932933	0.943775	0.994066	0.908826	0.951446				0.928753	0.948739	0.938746	0.930069	0.945108	0.937643	0.934347	0.94823	0.94139					51_Ethyne-Ethyne_TS_1.25_dimer.out	51_Ethyne-Ethyne_TS_1.25.xyz	-154.423	-153.708	-154.385	-153.699
0.4518	51_Ethyne-Ethyne_TS_1.50_dimer.out	0.0166554	0.0116734	0.0141644	0.0351815	0.00315518	0.0160131	0.00450915	0.0213956	0.0129524	0.024636	0.0384025	0.031559	0.0279908	0.0414659	0.0347975					0.468455	0.463473	0.465964	0.486981	0.448645	0.467813				0.456309	0.473195	0.464752	0.476436	0.490202	0.483359	0.479791	0.493266	0.486597					51_Ethyne-Ethyne_TS_1.50_dimer.out	51_Ethyne-Ethyne_TS_1.50.xyz	-154.423	-153.708	-154.384	-153.699
0.133953	51_Ethyne-Ethyne_TS_2.00_dimer.out	0.00808251	0.00625952	0.00717102	0.0130534	0.00292267	0.00798805	0.0048234	0.00844727	0.00663534	0.00822813	0.0133639	0.0107804	0.0097894	0.0150329	0.012388					0.142035	0.140212	0.141124	0.147006	0.136875	0.141941				0.138776	0.1424	0.140588	0.142181	0.147317	0.144733	0.143742	0.148986	0.146341					51_Ethyne-Ethyne_TS_2.00_dimer.out	51_Ethyne-Ethyne_TS_2.00.xyz	-154.422	-153.707	-154.383	-153.698
3.90822	52_Benzene-AcOH_OH-pi_0.90_dimer.out	0.18472	0.186844	0.00106184	0.570427	0.506694	0.0318665	0.0681622	0.0228606	0.0226508	0.128268	0.0765027	0.101972	0.0212839	0.0343776	0.00714566					4.09294	3.72137	3.90715	4.47864	3.40152	3.94008				3.84005	3.93108	3.88556	3.77995	3.83171	3.80624	3.88693	3.94259	3.91536					52_Benzene-AcOH_OH-pi_0.90_dimer.out	52_Benzene-AcOH_OH-pi_0.90.xyz	-460.713	-458.711	-460.593	-458.683
4.52526	52_Benzene-AcOH_OH-pi_0.95_dimer.out	0.177694	0.134746	0.021474	0.524762	0.385754	0.0695044	0.049856	0.0298233	0.0100164	0.110806	0.0726077	0.0912687	0.0232252	0.0158975	0.00299329					4.70295	4.39051	4.54673	5.05002	4.13951	4.59476				4.4754	4.55508	4.51524	4.41445	4.45265	4.43399	4.50203	4.54116	4.52227					52_Benzene-AcOH_OH-pi_0.95_dimer.out	52_Benzene-AcOH_OH-pi_0.95.xyz	-460.714	-458.714	-460.594	-458.686
4.65525	52_Benzene-AcOH_OH-pi_1.00_dimer.out	0.182211	0.0783787	0.0519164	0.467803	0.308357	0.0797234	0.00503249	0.0724027	0.0336851	0.0469191	0.00891039	0.027494	0.0235832	0.0611015	0.0430037					4.83746	4.57687	4.70717	5.12306	4.3469	4.73498				4.65022	4.72766	4.68894	4.60833	4.64634	4.62776	4.67884	4.71635	4.69826					52_Benzene-AcOH_OH-pi_1.00_dimer.out	52_Benzene-AcOH_OH-pi_1.00.xyz	-460.714	-458.716	-460.594	-458.688
4.50756	52_Benzene-AcOH_OH-pi_1.05_dimer.out	0.111245	0.108752	0.00124626	0.389086	0.27454	0.057273	0.0709174	5.60826e-05	0.0354868	0.0826646	0.0468441	0.0643733	0.0179691	0.0182823	0.000746903					4.61881	4.39881	4.50881	4.89665	4.23302	4.56483				4.43664	4.50751	4.47207	4.4249	4.46072	4.44319	4.48959	4.52584	4.50831					52_Benzene-AcOH_OH-pi_1.05_dimer.out	52_Benzene-AcOH_OH-pi_1.05.xyz	-460.714	-458.716	-460.594	-458.689
4.21346	52_Benzene-AcOH_OH-pi_1.10_dimer.out	0.0784468	0.107558	0.0145553	0.323751	0.242452	0.0406498	0.0823833	0.0191162	0.0507497	0.0540758	0.0230733	0.0382129	0.00188478	0.0340703	0.0185296					4.29191	4.1059	4.1989	4.53721	3.97101	4.25411				4.13108	4.19434	4.16271	4.15938	4.19039	4.17525	4.21534	4.24753	4.23199					52_Benzene-AcOH_OH-pi_1.10_dimer.out	52_Benzene-AcOH_OH-pi_1.10.xyz	-460.713	-458.717	-460.593	-458.689
3.10667	52_Benzene-AcOH_OH-pi_1.25_dimer.out	0.00136298	0.117492	0.0594276	0.166617	0.183851	0.00861681	0.111497	0.0739854	0.092741	0.0215768	0.0313718	0.0268151	0.0597822	0.0684456	0.064682					3.10531	2.98918	3.04724	3.27329	2.92282	3.09805				2.99517	3.03268	3.01393	3.12825	3.13804	3.13348	3.16645	3.17511	3.17135					52_Benzene-AcOH_OH-pi_1.25_dimer.out	52_Benzene-AcOH_OH-pi_1.25.xyz	-460.711	-458.717	-460.591	-458.689
1.69725	52_Benzene-AcOH_OH-pi_1.50_dimer.out	0.0108872	0.0614562	0.0361717	0.0998283	0.0635755	0.0181264	0.083476	0.0600668	0.0717714	0.0152475	0.0222091	0.018936	0.0389232	0.0466542	0.043115					1.68636	1.63579	1.66108	1.79708	1.63367	1.71538				1.61377	1.63718	1.62548	1.7125	1.71946	1.71618	1.73617	1.7439	1.74036					52_Benzene-AcOH_OH-pi_1.50_dimer.out	52_Benzene-AcOH_OH-pi_1.50.xyz	-460.709	-458.716	-460.589	-458.688
0.553786	52_Benzene-AcOH_OH-pi_2.00_dimer.out	6.41022e-05	0.00993119	0.00499765	0.0400214	1.22423e-05	0.0200046	0.0263456	0.0164344	0.02139	0.00384515	0.000156039	0.00192614	0.00509002	0.00810126	0.00672582					0.553722	0.543855	0.548789	0.593808	0.553774	0.573791				0.527441	0.537352	0.532396	0.549941	0.55363	0.55186	0.558876	0.561888	0.560512					52_Benzene-AcOH_OH-pi_2.00_dimer.out	52_Benzene-AcOH_OH-pi_2.00.xyz	-460.707	-458.715	-460.587	-458.687
3.7675	53_Benzene-AcNH2_NH-pi_0.90_dimer.out	0.00832027	0.26816	0.12992	0.269612	0.535354	0.132871	0.162992	0.0929788	0.127985	0.076349	0.050642	0.0629856	0.0227378	0.0603914	0.042198					3.77582	3.49934	3.63758	4.03712	3.23215	3.63463				3.60451	3.67453	3.63952	3.69116	3.71686	3.70452	3.79024	3.8279	3.8097					53_Benzene-AcNH2_NH-pi_0.90_dimer.out	53_Benzene-AcNH2_NH-pi_0.90.xyz	-440.844	-438.868	-440.729	-438.842
4.24208	53_Benzene-AcNH2_NH-pi_0.95_dimer.out	0.0505129	0.189614	0.0695503	0.257793	0.433666	0.0879366	0.0853871	0.0296042	0.0574957	0.0062654	0.00755863	0.00112862	0.0793791	0.10393	0.0922574					4.29259	4.05246	4.17253	4.49987	3.80841	4.15414				4.15669	4.21247	4.18458	4.23581	4.24963	4.2432	4.32146	4.34601	4.33433					53_Benzene-AcNH2_NH-pi_0.95_dimer.out	53_Benzene-AcNH2_NH-pi_0.95.xyz	-440.844	-438.871	-440.73	-438.844
4.33419	53_Benzene-AcNH2_NH-pi_1.00_dimer.out	0.002853	0.211136	0.106994	0.209383	0.380646	0.0856317	0.142002	0.0999988	0.121001	0.0378857	0.0361474	0.0365462	0.0387726	0.0483158	0.0441763					4.33134	4.12306	4.2272	4.54358	3.95355	4.24856				4.19219	4.2342	4.21319	4.29631	4.29805	4.29765	4.37297	4.38251	4.37837					53_Benzene-AcNH2_NH-pi_1.00_dimer.out	53_Benzene-AcNH2_NH-pi_1.00.xyz	-440.844	-438.872	-440.73	-438.846
4.20138	53_Benzene-AcNH2_NH-pi_1.05_dimer.out	0.0112414	0.189999	0.10062	0.185317	0.326785	0.0707337	0.140112	0.100318	0.120215	0.02542	0.0194272	0.0220212	0.0409874	0.0534071	0.0477474					4.19014	4.01138	4.10076	4.3867	3.8746	4.13065				4.06127	4.10107	4.08117	4.17596	4.18196	4.17936	4.24237	4.25479	4.24913					53_Benzene-AcNH2_NH-pi_1.05_dimer.out	53_Benzene-AcNH2_NH-pi_1.05.xyz	-440.844	-438.873	-440.73	-438.846
3.94465	53_Benzene-AcNH2_NH-pi_1.10_dimer.out	0.00452318	0.160464	0.0824934	0.173779	0.270703	0.0484618	0.121424	0.0881871	0.104806	0.0170405	0.0130622	0.0147016	0.036997	0.0480021	0.0429532					3.94013	3.78419	3.86216	4.11843	3.67395	3.89619				3.82323	3.85646	3.83985	3.92761	3.93159	3.92995	3.98165	3.99265	3.9876					53_Benzene-AcNH2_NH-pi_1.10_dimer.out	53_Benzene-AcNH2_NH-pi_1.10.xyz	-440.844	-438.873	-440.729	-438.847
2.95996	53_Benzene-AcNH2_NH-pi_1.25_dimer.out	0.0109993	0.11182	0.0614095	0.150798	0.146534	0.00213199	0.117079	0.0890598	0.10307	0.0243196	0.0207231	0.0222279	0.00953311	0.0195824	0.0149235					2.94896	2.84814	2.89855	3.11076	2.81343	2.96209				2.84288	2.8709	2.85689	2.93564	2.93924	2.93773	2.9695	2.97954	2.97489					53_Benzene-AcNH2_NH-pi_1.25_dimer.out	53_Benzene-AcNH2_NH-pi_1.25.xyz	-440.842	-438.873	-440.728	-438.847
1.64141	53_Benzene-AcNH2_NH-pi_1.50_dimer.out	0.0290997	0.0694031	0.0492514	0.0553974	0.0830313	0.013817	0.0844989	0.0604679	0.0724834	0.0272868	0.0228622	0.0254175	0.0468101	0.0461743	0.0469689					1.61231	1.572	1.59216	1.6968	1.55838	1.62759				1.55691	1.58094	1.56892	1.66869	1.66427	1.66682	1.68822	1.68758	1.68838					53_Benzene-AcNH2_NH-pi_1.50_dimer.out	53_Benzene-AcNH2_NH-pi_1.50.xyz	-440.84	-438.872	-440.725	-438.846
0.480903	53_Benzene-AcNH2_NH-pi_2.00_dimer.out	0.00640145	0.00889254	0.00124555	0.0313063	0.0120772	0.00961456	0.00992701	0.00680459	0.0083658	0.0161693	0.00817945	0.0123035	0.0247762	0.0160453	0.0206228					0.487304	0.47201	0.479657	0.512209	0.468825	0.490517				0.470976	0.474098	0.472537	0.497072	0.489082	0.493206	0.505679	0.496948	0.501525					53_Benzene-AcNH2_NH-pi_2.00_dimer.out	53_Benzene-AcNH2_NH-pi_2.00.xyz	-440.838	-438.871	-440.723	-438.844
2.74512	54_Benzene-Water_OH-pi_0.90_dimer.out	0.184585	0.0576323	0.0634765	0.392304	0.303509	0.0443977	0.0483977	0.103573	0.0759852	0.0754278	0.0361376	0.0556428	0.0267131	0.014995	0.00568659					2.92971	2.68749	2.8086	3.13743	2.44161	2.78952				2.79352	2.8487	2.82111	2.6697	2.70899	2.68948	2.71841	2.76012	2.73944					54_Benzene-Water_OH-pi_0.90_dimer.out	54_Benzene-Water_OH-pi_0.90.xyz	-308.244	-306.858	-308.164	-306.84
3.16118	54_Benzene-Water_OH-pi_0.95_dimer.out	0.153502	0.0494007	0.0520506	0.341123	0.245597	0.0477629	0.030491	0.0792326	0.0548618	0.0656887	0.0342899	0.0498258	0.0256747	0.00813889	0.00856056					3.31469	3.11178	3.21323	3.50231	2.91559	3.20895				3.19168	3.24042	3.21605	3.0955	3.12689	3.11136	3.13551	3.16932	3.15262					54_Benzene-Water_OH-pi_0.95_dimer.out	54_Benzene-Water_OH-pi_0.95.xyz	-308.245	-306.86	-308.164	-306.842
3.22366	54_Benzene-Water_OH-pi_1.00_dimer.out	0.130541	0.0376836	0.0464288	0.306652	0.185778	0.0604371	0.015077	0.059412	0.0372445	0.0687872	0.0440269	0.0562156	0.036957	0.0101117	0.0232832					3.3542	3.18597	3.27009	3.53031	3.03788	3.28409				3.23873	3.28307	3.2609	3.15487	3.17963	3.16744	3.1867	3.21355	3.20037					54_Benzene-Water_OH-pi_1.00_dimer.out	54_Benzene-Water_OH-pi_1.00.xyz	-308.245	-306.861	-308.164	-306.843
3.09425	54_Benzene-Water_OH-pi_1.05_dimer.out	0.0946217	0.0469707	0.0238255	0.255656	0.162377	0.0466395	0.0109582	0.028694	0.00886787	0.0675815	0.0425609	0.0549264	0.0406038	0.0123064	0.0262896					3.18887	3.04727	3.11807	3.3499	2.93187	3.14089				3.08329	3.12294	3.10311	3.02666	3.05168	3.03932	3.05364	3.08194	3.06796					54_Benzene-Water_OH-pi_1.05_dimer.out	54_Benzene-Water_OH-pi_1.05.xyz	-308.245	-306.862	-308.164	-306.843
2.87037	54_Benzene-Water_OH-pi_1.10_dimer.out	0.0473632	0.0724182	0.0125275	0.192712	0.158282	0.0172151	0.0479324	0.016123	0.0320277	0.0648965	0.0474794	0.0560348	0.0439422	0.0226211	0.03311					2.91774	2.79796	2.85785	3.06309	2.71209	2.88759				2.82244	2.85425	2.83835	2.80548	2.82289	2.81434	2.82643	2.84775	2.83726					54_Benzene-Water_OH-pi_1.10_dimer.out	54_Benzene-Water_OH-pi_1.10.xyz	-308.244	-306.862	-308.163	-306.844
2.08886	54_Benzene-Water_OH-pi_1.25_dimer.out	0.000383661	0.0786155	0.0394996	0.104664	0.109163	0.00224989	0.0692562	0.0585873	0.0639218	0.0083629	0.00663052	0.00738186	0.00421849	0.00787039	0.00620166					2.08847	2.01024	2.04936	2.19352	1.97969	2.08661				2.0196	2.03027	2.02494	2.08049	2.08223	2.08148	2.09308	2.09673	2.09506					54_Benzene-Water_OH-pi_1.25_dimer.out	54_Benzene-Water_OH-pi_1.25.xyz	-308.243	-306.862	-308.162	-306.844
1.15401	54_Benzene-Water_OH-pi_1.50_dimer.out	0.000947797	0.0375449	0.0182986	0.0563235	0.0414724	0.00742556	0.0353584	0.03497	0.0351642	0.0131588	0.0075189	0.0104184	0.0249718	0.0199779	0.0225978					1.15496	1.11646	1.13571	1.21033	1.11254	1.16143				1.11865	1.11904	1.11884	1.16717	1.16153	1.16443	1.17898	1.17399	1.17661					54_Benzene-Water_OH-pi_1.50_dimer.out	54_Benzene-Water_OH-pi_1.50.xyz	-308.242	-306.861	-308.161	-306.843
0.417078	54_Benzene-Water_OH-pi_2.00_dimer.out	0.00223639	0.00628027	0.00202194	0.0148259	0.00754724	0.00363934	0.00601774	0.00544959	0.00573367	0.0037617	0.00198901	0.00290373	0.00861093	0.0074332	0.008059					0.419314	0.410797	0.415056	0.431904	0.40953	0.420717				0.41106	0.411628	0.411344	0.420839	0.419067	0.419981	0.425689	0.424511	0.425137					54_Benzene-Water_OH-pi_2.00_dimer.out	54_Benzene-Water_OH-pi_2.00.xyz	-308.24	-306.861	-308.159	-306.842
3.338	55_Benzene-MeOH_OH-pi_0.90_dimer.out	0.271871	0.0517817	0.110045	0.610141	0.324378	0.142882	0.050089	0.126942	0.0885154	0.158579	0.116964	0.137443	0.0746508	0.0310325	0.0523799					3.60988	3.28622	3.44805	3.94815	3.01363	3.48089				3.38809	3.46495	3.42652	3.17943	3.22104	3.20056	3.26335	3.30697	3.28562					55_Benzene-MeOH_OH-pi_0.90_dimer.out	55_Benzene-MeOH_OH-pi_0.90.xyz	-347.475	-345.889	-347.384	-345.868
3.9499	55_Benzene-MeOH_OH-pi_0.95_dimer.out	0.300413	0.0282218	0.164317	0.577165	0.215679	0.180743	0.118965	0.188131	0.153548	0.0949916	0.0623327	0.0783211	0.0331956	0.000977823	0.0165813					4.25031	3.97812	4.11421	4.52706	3.73422	4.13064				4.06886	4.13803	4.10344	3.85491	3.88756	3.87158	3.9167	3.94892	3.93332					55_Benzene-MeOH_OH-pi_0.95_dimer.out	55_Benzene-MeOH_OH-pi_0.95.xyz	-347.476	-345.892	-347.385	-345.871
4.10581	55_Benzene-MeOH_OH-pi_1.00_dimer.out	0.278641	0.044481	0.161561	0.531109	0.145911	0.192599	0.113114	0.169308	0.141211	0.0815076	0.0596879	0.0702747	0.0335582	0.0113438	0.0219903					4.38445	4.15029	4.26737	4.63692	3.9599	4.29841				4.21893	4.27512	4.24703	4.02431	4.04613	4.03554	4.07226	4.09447	4.08382					55_Benzene-MeOH_OH-pi_1.00_dimer.out	55_Benzene-MeOH_OH-pi_1.00.xyz	-347.476	-345.894	-347.385	-345.873
3.9982	55_Benzene-MeOH_OH-pi_1.05_dimer.out	0.218639	0.017797	0.118218	0.44898	0.124281	0.162349	0.0676199	0.110948	0.0892841	0.0702595	0.0595465	0.0645835	0.0281836	0.015475	0.0213924					4.21684	4.016	4.11642	4.44718	3.87392	4.16055				4.06582	4.10915	4.08749	3.92794	3.93866	3.93362	3.97002	3.98273	3.97681					55_Benzene-MeOH_OH-pi_1.05_dimer.out	55_Benzene-MeOH_OH-pi_1.05.xyz	-347.476	-345.895	-347.385	-345.874
3.74932	55_Benzene-MeOH_OH-pi_1.10_dimer.out	0.155339	0.0172192	0.0690601	0.354778	0.134657	0.11006	0.0245807	0.0597774	0.042179	0.0516377	0.0467636	0.0488892	0.020202	0.0129116	0.0161332					3.90466	3.7321	3.81838	4.1041	3.61466	3.85938				3.7739	3.8091	3.7915	3.69768	3.70256	3.70043	3.72912	3.73641	3.73319					55_Benzene-MeOH_OH-pi_1.10_dimer.out	55_Benzene-MeOH_OH-pi_1.10.xyz	-347.475	-345.896	-347.385	-345.875
2.77441	55_Benzene-MeOH_OH-pi_1.25_dimer.out	0.0553004	0.0502185	0.00254094	0.193351	0.11549	0.0389304	0.0352102	0.00742428	0.0213172	0.0230598	0.0324686	0.0279818	0.0396263	0.0539485	0.0470495					2.82971	2.72419	2.77695	2.96776	2.65892	2.81334				2.7392	2.76698	2.75309	2.79747	2.80688	2.80239	2.81403	2.82836	2.82146					55_Benzene-MeOH_OH-pi_1.25_dimer.out	55_Benzene-MeOH_OH-pi_1.25.xyz	-347.474	-345.896	-347.383	-345.875
1.52391	55_Benzene-MeOH_OH-pi_1.50_dimer.out	0.0208908	0.0343327	0.00672096	0.0980814	0.0412867	0.0283973	0.0297179	0.0297735	0.0297457	0.0338451	0.0221101	0.0281232	0.0479306	0.0391462	0.0437257					1.5448	1.48958	1.51719	1.62199	1.48262	1.55231				1.49419	1.49414	1.49416	1.55775	1.54602	1.55203	1.57184	1.56306	1.56763					55_Benzene-MeOH_OH-pi_1.50_dimer.out	55_Benzene-MeOH_OH-pi_1.50.xyz	-347.472	-345.895	-347.381	-345.875
0.518123	55_Benzene-MeOH_OH-pi_2.00_dimer.out	0.0138741	0.00279495	0.0055396	0.0347845	0.00700995	0.0138873	0.00016461	3.1451e-05	6.65797e-05	0.0202728	0.0166368	0.0184981	0.0276905	0.0247711	0.0262912					0.531997	0.515328	0.523663	0.552908	0.511113	0.532011				0.518288	0.518092	0.51819	0.538396	0.53476	0.536621	0.545814	0.542894	0.544415					55_Benzene-MeOH_OH-pi_2.00_dimer.out	55_Benzene-MeOH_OH-pi_2.00.xyz	-347.47	-345.895	-347.379	-345.874
2.38091	56_Benzene-MeNH2_NH-pi_0.90_dimer.out	0.369806	0.0912058	0.230506	0.667526	0.178291	0.244617	0.174611	0.267897	0.221254	0.0945856	0.0375461	0.0657429	0.0191227	0.0347043	0.00831186					2.75072	2.47212	2.61142	3.04844	2.20262	2.62553				2.55552	2.64881	2.60216	2.28633	2.34336	2.31517	2.36179	2.41562	2.38922					56_Benzene-MeNH2_NH-pi_0.90_dimer.out	56_Benzene-MeNH2_NH-pi_0.90.xyz	-327.612	-326.049	-327.526	-326.03
2.97661	56_Benzene-MeNH2_NH-pi_0.95_dimer.out	0.353569	0.119774	0.236671	0.632392	0.0795173	0.276437	0.170764	0.250435	0.2106	0.0833162	0.034108	0.0584484	0.0256527	0.0207688	0.00202275					3.33018	3.09638	3.21328	3.609	2.89709	3.25304				3.14737	3.22704	3.18721	2.89329	2.9425	2.91816	2.95095	2.99737	2.97458					56_Benzene-MeNH2_NH-pi_0.95_dimer.out	56_Benzene-MeNH2_NH-pi_0.95.xyz	-327.612	-326.052	-327.527	-326.033
3.13876	56_Benzene-MeNH2_NH-pi_1.00_dimer.out	0.331785	0.135824	0.233805	0.5854	0.0210397	0.28218	0.165507	0.238669	0.202088	0.0726852	0.0328953	0.0524902	0.0284001	0.00843653	0.00951147					3.47054	3.27458	3.37256	3.72416	3.11772	3.42094				3.30427	3.37743	3.34085	3.06607	3.10586	3.08627	3.11036	3.1472	3.12925					56_Benzene-MeNH2_NH-pi_1.00_dimer.out	56_Benzene-MeNH2_NH-pi_1.00.xyz	-327.613	-326.054	-327.527	-326.035
3.04387	56_Benzene-MeNH2_NH-pi_1.05_dimer.out	0.29027	0.131114	0.210692	0.521551	0.0158802	0.268716	0.138634	0.206665	0.17265	0.0520134	0.0184241	0.0348939	0.0141649	0.0168925	0.00186921					3.33414	3.17498	3.25456	3.56542	3.05975	3.31258				3.1825	3.25053	3.21652	2.99185	3.02544	3.00897	3.0297	3.06076	3.04574					56_Benzene-MeNH2_NH-pi_1.05_dimer.out	56_Benzene-MeNH2_NH-pi_1.05.xyz	-327.612	-326.055	-327.527	-326.036
2.80285	56_Benzene-MeNH2_NH-pi_1.10_dimer.out	0.17476	0.0466431	0.110702	0.410144	0.0118859	0.199129	0.0204347	0.0850167	0.0527257	0.100178	0.0667128	0.0831378	0.0714339	0.0385997	0.0545593					2.97761	2.84949	2.91355	3.21299	2.79096	3.00198				2.82328	2.88787	2.85558	2.70267	2.73614	2.71971	2.73142	2.76425	2.74829					56_Benzene-MeNH2_NH-pi_1.10_dimer.out	56_Benzene-MeNH2_NH-pi_1.10.xyz	-327.612	-326.056	-327.527	-326.037
1.92243	56_Benzene-MeNH2_NH-pi_1.25_dimer.out	0.0785534	0.0043711	0.0414623	0.21044	0.031115	0.0896626	0.00791604	0.027637	0.00986047	0.0158566	0.030457	0.0233932	0.033514	0.050709	0.0424326					2.00098	1.9268	1.96389	2.13287	1.89131	2.01209				1.91451	1.95007	1.93229	1.93829	1.95289	1.94582	1.95594	1.97314	1.96486					56_Benzene-MeNH2_NH-pi_1.25_dimer.out	56_Benzene-MeNH2_NH-pi_1.25.xyz	-327.61	-326.057	-327.525	-326.037
0.93271	56_Benzene-MeNH2_NH-pi_1.50_dimer.out	0.0304876	0.00340267	0.0135425	0.0814306	0.0171658	0.0321324	0.00291237	0.00562088	0.00135425	0.0686412	0.0686413	0.0687547	0.0827991	0.0842959	0.0837123					0.963198	0.929307	0.946252	1.01414	0.915544	0.964842				0.929798	0.938331	0.934064	1.00135	1.00135	1.00146	1.01551	1.01701	1.01642					56_Benzene-MeNH2_NH-pi_1.50_dimer.out	56_Benzene-MeNH2_NH-pi_1.50.xyz	-327.609	-326.056	-327.523	-326.037
0.260262	56_Benzene-MeNH2_NH-pi_2.00_dimer.out	0.0082328	0.00202078	0.00512679	0.0284985	0.00101561	0.014757	0.00505407	0.00267979	0.00118714	0.00771764	0.0132461	0.0105096	0.0141167	0.0197965	0.0170013					0.268495	0.262283	0.265389	0.28876	0.261277	0.275019				0.255208	0.262942	0.259075	0.267979	0.273508	0.270771	0.274379	0.280058	0.277263					56_Benzene-MeNH2_NH-pi_2.00_dimer.out	56_Benzene-MeNH2_NH-pi_2.00.xyz	-327.608	-326.056	-327.522	-326.037
3.59468	57_Benzene-Peptide_NH-pi_0.90_dimer.out	0.42408	0.00595494	0.209063	1.01603	0.31365	0.35119	0.0359769	0.195781	0.115879	0.16182	0.116585	0.138001	0.0489281	0.00858893	0.0268811					4.01876	3.58873	3.80374	4.61071	3.28103	3.94587				3.63066	3.79046	3.71056	3.43286	3.4781	3.45668	3.54575	3.58609	3.5678					57_Benzene-Peptide_NH-pi_0.90_dimer.out	57_Benzene-Peptide_NH-pi_0.90.xyz	-480.088	-477.903	-479.963	-477.875
4.82807	57_Benzene-Peptide_NH-pi_0.95_dimer.out	0.459871	0.10182	0.280845	0.922741	0.161013	0.380864	0.156397	0.274143	0.21527	0.052854	0.0420272	0.0463261	0.0473539	0.0539602	0.0523857					5.28794	4.92989	5.10892	5.75081	4.66706	5.20893				4.98447	5.10221	5.04334	4.77522	4.78604	4.78174	4.87542	4.88203	4.88046					57_Benzene-Peptide_NH-pi_0.95_dimer.out	57_Benzene-Peptide_NH-pi_0.95.xyz	-480.09	-477.908	-479.965	-477.88
5.17609	57_Benzene-Peptide_NH-pi_1.00_dimer.out	0.399713	0.105994	0.252853	0.789396	0.115309	0.337044	0.144223	0.251088	0.197655	0.00717134	0.00370146	0.000724243	0.080782	0.0873601	0.0856518					5.5758	5.28208	5.42894	5.96548	5.06078	5.51313				5.32031	5.42717	5.37374	5.16891	5.17979	5.17536	5.25687	5.26345	5.26174					57_Benzene-Peptide_NH-pi_1.00_dimer.out	57_Benzene-Peptide_NH-pi_1.00.xyz	-480.09	-477.911	-479.966	-477.883
5.0589	57_Benzene-Peptide_NH-pi_1.05_dimer.out	0.364678	0.126568	0.245623	0.720892	0.0346967	0.343097	0.131132	0.232298	0.181715	0.0212504	0.0122995	0.015806	0.0494938	0.0532598	0.0529001					5.42358	5.18547	5.30452	5.77979	5.0242	5.402				5.19003	5.2912	5.24062	5.03765	5.0466	5.04309	5.10839	5.11216	5.1118					57_Benzene-Peptide_NH-pi_1.05_dimer.out	57_Benzene-Peptide_NH-pi_1.05.xyz	-480.09	-477.913	-479.965	-477.885
4.71472	57_Benzene-Peptide_NH-pi_1.10_dimer.out	0.275618	0.0802095	0.177914	0.571029	0.0661474	0.252441	0.0819368	0.176166	0.129051	0.0117018	0.0276934	0.0205361	0.0690261	0.0823277	0.0769754					4.99033	4.79493	4.89263	5.28575	4.64857	4.96716				4.79665	4.89088	4.84377	4.72642	4.74241	4.73525	4.78374	4.79704	4.79169					57_Benzene-Peptide_NH-pi_1.10_dimer.out	57_Benzene-Peptide_NH-pi_1.10.xyz	-480.089	-477.914	-479.964	-477.886
3.38389	57_Benzene-Peptide_NH-pi_1.25_dimer.out	0.0969493	0.0162684	0.0403404	0.315133	0.0634966	0.125818	0.0460992	0.0146959	0.0157016	0.050039	0.0482332	0.0498491	0.0875974	0.0860609	0.0879152					3.48084	3.36763	3.42423	3.69903	3.3204	3.50971				3.3378	3.39859	3.36819	3.43393	3.43213	3.43374	3.47149	3.46996	3.47181					57_Benzene-Peptide_NH-pi_1.25_dimer.out	57_Benzene-Peptide_NH-pi_1.25.xyz	-480.087	-477.915	-479.962	-477.886
1.79943	57_Benzene-Peptide_NH-pi_1.50_dimer.out	0.0381722	0.0146176	0.0117773	0.144021	0.0157371	0.0641422	0.0312262	0.0138836	0.0225549	0.0746762	0.0545044	0.065031	0.0995025	0.0820744	0.0914279					1.8376	1.78481	1.8112	1.94345	1.78369	1.86357				1.7682	1.78554	1.77687	1.8741	1.85393	1.86446	1.89893	1.8815	1.89085					57_Benzene-Peptide_NH-pi_1.50_dimer.out	57_Benzene-Peptide_NH-pi_1.50.xyz	-480.084	-477.914	-479.959	-477.885
0.619431	57_Benzene-Peptide_NH-pi_2.00_dimer.out	0.00721808	0.00343046	0.00189381	0.0375093	0.0057146	0.0158973	0.0126419	0.0019329	0.00728739	0.0180514	0.0178464	0.0180771	0.0281528	0.0286728	0.0286016					0.626649	0.616	0.621324	0.65694	0.613716	0.635328				0.606789	0.617498	0.612143	0.637482	0.637277	0.637508	0.647583	0.648103	0.648032					57_Benzene-Peptide_NH-pi_2.00_dimer.out	57_Benzene-Peptide_NH-pi_2.00.xyz	-480.082	-477.913	-479.957	-477.884
2.88416	58_Pyridine-Pyridine_CH-N_0.90_dimer.out	0.00300317	0.253302	0.125149	0.170752	0.574722	0.201985	0.106979	0.0425672	0.0747729	0.0296127	0.0395936	0.0352378	0.138301	0.161847	0.15088					2.88717	2.63086	2.75901	3.05491	2.30944	2.68218				2.77718	2.8416	2.80939	2.91377	2.92376	2.9194	3.02246	3.04601	3.03504					58_Pyridine-Pyridine_CH-N_0.90_dimer.out	58_Pyridine-Pyridine_CH-N_0.90.xyz	-495.821	-493.582	-495.696	-493.554
3.86933	58_Pyridine-Pyridine_CH-N_0.95_dimer.out	0.0178177	0.229388	0.123603	0.160554	0.459269	0.149358	0.134764	0.0786694	0.106717	0.0261701	0.0362707	0.0317693	0.126705	0.151418	0.139724					3.85151	3.63994	3.74573	4.02988	3.41006	3.71997				3.73457	3.79066	3.76261	3.8955	3.9056	3.9011	3.99604	4.02075	4.00905					58_Pyridine-Pyridine_CH-N_0.95_dimer.out	58_Pyridine-Pyridine_CH-N_0.95.xyz	-495.822	-493.585	-495.697	-493.557
4.16646	58_Pyridine-Pyridine_CH-N_1.00_dimer.out	0.0998163	0.266507	0.183161	0.056242	0.438495	0.191126	0.202134	0.153745	0.177939	0.0455	0.0675844	0.0568991	0.13281	0.170824	0.152185					4.06664	3.89995	3.98329	4.2227	3.72796	3.97533				3.96432	4.01271	3.98852	4.21196	4.23404	4.22336	4.29927	4.33728	4.31864					58_Pyridine-Pyridine_CH-N_1.00_dimer.out	58_Pyridine-Pyridine_CH-N_1.00.xyz	-495.822	-493.587	-495.698	-493.559
3.88977	58_Pyridine-Pyridine_CH-N_1.05_dimer.out	0.072571	0.205161	0.138866	0.0769156	0.329335	0.12621	0.17058	0.123747	0.147163	0.0256256	0.0494869	0.0378624	0.0935927	0.128334	0.111317					3.8172	3.68461	3.7509	3.96669	3.56044	3.76356				3.71919	3.76602	3.74261	3.9154	3.93926	3.92763	3.98336	4.0181	4.00109					58_Pyridine-Pyridine_CH-N_1.05_dimer.out	58_Pyridine-Pyridine_CH-N_1.05.xyz	-495.822	-493.588	-495.697	-493.56
3.44199	58_Pyridine-Pyridine_CH-N_1.10_dimer.out	0.0297426	0.136168	0.0829555	0.116414	0.232454	0.0580202	0.125568	0.0730401	0.0993039	0.0538234	0.0896012	0.0719456	0.109587	0.151144	0.130683					3.41224	3.30582	3.35903	3.5584	3.20953	3.38397				3.31642	3.36895	3.34268	3.49581	3.53159	3.51393	3.55157	3.59313	3.57267					58_Pyridine-Pyridine_CH-N_1.10_dimer.out	58_Pyridine-Pyridine_CH-N_1.10.xyz	-495.821	-493.588	-495.697	-493.56
2.17336	58_Pyridine-Pyridine_CH-N_1.25_dimer.out	0.00809592	0.0673871	0.0377415	0.11657	0.114528	0.00102056	0.0898309	0.0364796	0.0631553	0.0433179	0.0762936	0.060066	0.080375	0.114995	0.098089					2.16526	2.10597	2.13562	2.28993	2.05883	2.17438				2.08353	2.13688	2.1102	2.21667	2.24965	2.23342	2.25373	2.28835	2.27145					58_Pyridine-Pyridine_CH-N_1.25_dimer.out	58_Pyridine-Pyridine_CH-N_1.25.xyz	-495.819	-493.587	-495.695	-493.559
1.00513	58_Pyridine-Pyridine_CH-N_1.50_dimer.out	0.00492021	0.0421807	0.0235505	0.0803432	0.0521974	0.0140729	0.0608218	0.0356134	0.0482176	0.0165928	0.0284633	0.0226958	0.0362329	0.0479296	0.0423574					1.00021	0.962951	0.981581	1.08548	0.952935	1.0192				0.94431	0.969518	0.956914	1.02172	1.0336	1.02783	1.04136	1.05306	1.04749					58_Pyridine-Pyridine_CH-N_1.50_dimer.out	58_Pyridine-Pyridine_CH-N_1.50.xyz	-495.818	-493.586	-495.693	-493.558
0.274043	58_Pyridine-Pyridine_CH-N_2.00_dimer.out	0.00437211	0.0041821	9.50052e-05	0.0372769	0.00682475	0.0152261	0.0172014	0.00244948	0.00982544	0.00299393	0.0060132	0.00157656	0.00473712	0.0113192	0.00817316					0.278415	0.26986	0.274138	0.311319	0.267218	0.289269				0.256841	0.271593	0.264217	0.271049	0.280056	0.275619	0.27878	0.285362	0.282216					58_Pyridine-Pyridine_CH-N_2.00_dimer.out	58_Pyridine-Pyridine_CH-N_2.00.xyz	-495.816	-493.586	-495.691	-493.557
2.60366	59_Ethyne-Water_CH-O_0.90_dimer.out	0.0295778	0.154094	0.0918358	0.00853259	0.322276	0.165404	0.0433758	0.043828	0.0436019	0.0261612	0.0167343	0.0215513	0.00294652	0.0132306	0.00489781					2.57409	2.44957	2.51183	2.59513	2.28139	2.43826				2.56029	2.55984	2.56006	2.5775	2.58693	2.58211	2.60072	2.61689	2.60856					59_Ethyne-Water_CH-O_0.90_dimer.out	59_Ethyne-Water_CH-O_0.90.xyz	-153.578	-152.922	-153.537	-152.912
2.86494	59_Ethyne-Water_CH-O_0.95_dimer.out	0.0228597	0.127908	0.0753838	0.00845333	0.259723	0.125635	0.0433897	0.0414852	0.0424374	0.0290602	0.0160528	0.0226743	0.00831807	0.0114751	0.00131073					2.84208	2.73703	2.78956	2.87339	2.60522	2.73931				2.82155	2.82346	2.8225	2.83588	2.84889	2.84227	2.85662	2.87642	2.86625					59_Ethyne-Water_CH-O_0.95_dimer.out	59_Ethyne-Water_CH-O_0.95.xyz	-153.579	-152.922	-153.538	-152.912
2.89872	59_Ethyne-Water_CH-O_1.00_dimer.out	0.0325729	0.122459	0.0775158	0.00401281	0.225838	0.110913	0.0565598	0.0546797	0.0556198	0.030663	0.0211716	0.0259936	0.0150342	0.000607713	0.00799863					2.86614	2.77626	2.8212	2.90273	2.67288	2.7878				2.84216	2.84404	2.8431	2.86805	2.87754	2.87272	2.88368	2.89811	2.89072					59_Ethyne-Water_CH-O_1.00_dimer.out	59_Ethyne-Water_CH-O_1.00.xyz	-153.579	-152.923	-153.538	-152.913
2.79927	59_Ethyne-Water_CH-O_1.05_dimer.out	0.0226847	0.100528	0.0616065	0.0180339	0.181623	0.0817947	0.0493813	0.0473595	0.0483704	0.0293128	0.021604	0.0255152	0.0151907	0.0034908	0.00947652					2.77658	2.69874	2.73766	2.8173	2.61764	2.71747				2.74989	2.75191	2.7509	2.76995	2.77766	2.77375	2.78408	2.79578	2.78979					59_Ethyne-Water_CH-O_1.05_dimer.out	59_Ethyne-Water_CH-O_1.05.xyz	-153.579	-152.923	-153.538	-152.913
2.62788	59_Ethyne-Water_CH-O_1.10_dimer.out	0.0178787	0.086212	0.0520453	0.0295193	0.146374	0.0584273	0.0489544	0.0467678	0.0478611	0.0335287	0.0275445	0.0305739	0.0208961	0.0123249	0.0166968					2.61	2.54167	2.57584	2.6574	2.48151	2.56945				2.57893	2.58111	2.58002	2.59435	2.60034	2.59731	2.60699	2.61556	2.61118					59_Ethyne-Water_CH-O_1.10_dimer.out	59_Ethyne-Water_CH-O_1.10.xyz	-153.579	-152.923	-153.537	-152.913
1.99931	59_Ethyne-Water_CH-O_1.25_dimer.out	0.00991529	0.0548886	0.0324019	0.0406248	0.0865295	0.0229524	0.0430511	0.0341437	0.0385974	0.0340658	0.0209211	0.0275375	0.0275725	0.0132567	0.0204927					1.98939	1.94442	1.96691	2.03994	1.91278	1.97636				1.95626	1.96517	1.96071	1.96524	1.97839	1.97177	1.97174	1.98605	1.97882					59_Ethyne-Water_CH-O_1.25_dimer.out	59_Ethyne-Water_CH-O_1.25.xyz	-153.578	-152.922	-153.536	-152.912
1.17815	59_Ethyne-Water_CH-O_1.50_dimer.out	0.0133878	0.037393	0.0253904	0.0308422	0.0487721	0.00896495	0.0423865	0.0299325	0.0361595	0.0152618	8.74126e-05	0.00769694	0.0117938	0.00438055	0.00374837					1.16476	1.14075	1.15276	1.20899	1.12937	1.16918				1.13576	1.14821	1.14199	1.16288	1.17806	1.17045	1.16635	1.18253	1.1744					59_Ethyne-Water_CH-O_1.50_dimer.out	59_Ethyne-Water_CH-O_1.50.xyz	-153.576	-152.921	-153.535	-152.911
0.461297	59_Ethyne-Water_CH-O_2.00_dimer.out	0.00425824	0.00745223	0.001597	0.0242724	0.00779816	0.00823714	0.00886376	0.00722543	0.00804459	0.00672154	0.00430045	0.00551898	0.00538535	0.00299319	0.00419935					0.465555	0.453844	0.4597	0.485569	0.453498	0.469534				0.452433	0.454071	0.453252	0.454575	0.456996	0.455778	0.455911	0.458303	0.457097					59_Ethyne-Water_CH-O_2.00_dimer.out	59_Ethyne-Water_CH-O_2.00.xyz	-153.575	-152.92	-153.534	-152.91
4.30609	60_Ethyne-AcOH_OH-pi_0.90_dimer.out	0.139571	0.342745	0.241158	0.0961945	0.668723	0.382459	0.168011	0.129022	0.148516	0.0678915	0.0387045	0.0531628	0.000976046	0.0325131	0.0159572					4.16652	3.96335	4.06493	4.2099	3.63737	3.92363				4.13808	4.17707	4.15758	4.2382	4.26739	4.25293	4.30512	4.33861	4.32205					60_Ethyne-AcOH_OH-pi_0.90_dimer.out	60_Ethyne-AcOH_OH-pi_0.90.xyz	-306.047	-304.775	-305.967	-304.755
4.7866	60_Ethyne-AcOH_OH-pi_0.95_dimer.out	0.109321	0.281096	0.195208	0.103612	0.579224	0.341418	0.113064	0.0856332	0.0993486	0.0166916	0.0336113	0.0253026	0.0760104	0.0970689	0.0867556					4.67728	4.50551	4.59139	4.68299	4.20738	4.44519				4.67354	4.70097	4.68725	4.80329	4.82021	4.81191	4.86261	4.88367	4.87336					60_Ethyne-AcOH_OH-pi_0.95_dimer.out	60_Ethyne-AcOH_OH-pi_0.95.xyz	-306.048	-304.776	-305.968	-304.757
4.85415	60_Ethyne-AcOH_OH-pi_1.00_dimer.out	0.117422	0.262092	0.189757	0.0779743	0.475186	0.27658	0.143285	0.122381	0.132833	0.0353664	0.0216875	0.0284178	0.0152177	0.0329036	0.0242074					4.73673	4.59206	4.6644	4.77618	4.37897	4.57757				4.71087	4.73177	4.72132	4.81879	4.83247	4.82574	4.86937	4.88706	4.87836					60_Ethyne-AcOH_OH-pi_1.00_dimer.out	60_Ethyne-AcOH_OH-pi_1.00.xyz	-306.048	-304.777	-305.968	-304.758
4.67874	60_Ethyne-AcOH_OH-pi_1.05_dimer.out	0.0929884	0.214227	0.153608	0.0506125	0.369435	0.210024	0.120771	0.112466	0.116619	0.029507	0.0332871	0.0312393	0.0124889	0.0104603	0.0117211					4.58575	4.46451	4.52513	4.62813	4.3093	4.46872				4.55797	4.56627	4.56212	4.64923	4.64545	4.6475	4.69123	4.6892	4.69046					60_Ethyne-AcOH_OH-pi_1.05_dimer.out	60_Ethyne-AcOH_OH-pi_1.05.xyz	-306.048	-304.778	-305.968	-304.759
4.37113	60_Ethyne-AcOH_OH-pi_1.10_dimer.out	0.0784515	0.18111	0.129781	0.0582681	0.321926	0.190097	0.0916845	0.0887856	0.090235	0.00633738	0.0185643	0.0122614	0.0307362	0.0183754	0.0248753					4.29267	4.19002	4.24135	4.31286	4.0492	4.18103				4.27944	4.28234	4.28089	4.36479	4.35256	4.35886	4.40186	4.3895	4.396					60_Ethyne-AcOH_OH-pi_1.10_dimer.out	60_Ethyne-AcOH_OH-pi_1.10.xyz	-306.048	-304.778	-305.967	-304.759
3.23436	60_Ethyne-AcOH_OH-pi_1.25_dimer.out	0.0582794	0.122834	0.0905567	0.0313152	0.205133	0.118224	0.0759581	0.0688761	0.0724171	0.00425963	0.00445923	0.00425973	0.0161678	0.017484	0.0169741					3.17608	3.11152	3.1438	3.20304	3.02922	3.11613				3.1584	3.16548	3.16194	3.2301	3.2299	3.2301	3.25052	3.25184	3.25133					60_Ethyne-AcOH_OH-pi_1.25_dimer.out	60_Ethyne-AcOH_OH-pi_1.25.xyz	-306.046	-304.777	-305.966	-304.758
1.76008	60_Ethyne-AcOH_OH-pi_1.50_dimer.out	0.0341124	0.0648327	0.0494726	0.013068	0.100532	0.0568	0.0479099	0.041427	0.0446685	0.0178686	0.0189014	0.018463	0.0293424	0.0309778	0.0302846					1.72597	1.69525	1.71061	1.74701	1.65955	1.70328				1.71217	1.71865	1.71541	1.77795	1.77898	1.77854	1.78942	1.79106	1.79036					60_Ethyne-AcOH_OH-pi_1.50_dimer.out	60_Ethyne-AcOH_OH-pi_1.50.xyz	-306.044	-304.776	-305.963	-304.756
0.555852	60_Ethyne-AcOH_OH-pi_2.00_dimer.out	0.0108151	0.0146688	0.0127419	0.0089565	0.0242014	0.0165789	0.0120336	0.00841886	0.0102262	0.00806588	0.00731415	0.00774346	0.0146488	0.0126249	0.0137438					0.545037	0.541183	0.54311	0.546895	0.53165	0.539273				0.543818	0.547433	0.545625	0.563918	0.563166	0.563595	0.5705	0.568477	0.569595					60_Ethyne-AcOH_OH-pi_2.00_dimer.out	60_Ethyne-AcOH_OH-pi_2.00.xyz	-306.042	-304.774	-305.961	-304.755
2.62929	61_Pentane-AcOH_0.90_dimer.out	0.0169889	0.288613	0.135812	0.287886	0.490978	0.101546	0.160621	0.155936	0.158278	0.0941386	0.147227	0.120031	0.0177433	0.0279292	0.00417344					2.64628	2.34068	2.49348	2.91718	2.13831	2.52775				2.46867	2.47336	2.47101	2.53515	2.48206	2.50926	2.64703	2.60136	2.62512					61_Pentane-AcOH_0.90_dimer.out	61_Pentane-AcOH_0.90.xyz	-426.29	-424.33	-426.177	-424.304
2.83503	61_Pentane-AcOH_0.95_dimer.out	0.00265049	0.259003	0.128176	0.247067	0.42702	0.0899762	0.157598	0.148846	0.153222	0.0754661	0.120442	0.097342	0.0182217	0.020968	0.000494186					2.83768	2.57603	2.70685	3.0821	2.40801	2.74505				2.67743	2.68618	2.68181	2.75956	2.71459	2.73769	2.85325	2.81406	2.83453					61_Pentane-AcOH_0.95_dimer.out	61_Pentane-AcOH_0.95.xyz	-426.291	-424.332	-426.177	-424.306
2.8197	61_Pentane-AcOH_1.00_dimer.out	0.00637234	0.218561	0.106094	0.237781	0.345645	0.0539321	0.145347	0.135241	0.140294	0.0674187	0.111229	0.0887109	0.0104922	0.0288663	0.00829542					2.82607	2.60114	2.7136	3.05748	2.47405	2.76577				2.67435	2.68446	2.6794	2.75228	2.70847	2.73099	2.83019	2.79083	2.8114					61_Pentane-AcOH_1.00_dimer.out	61_Pentane-AcOH_1.00.xyz	-426.291	-424.334	-426.177	-424.307
2.67689	61_Pentane-AcOH_1.05_dimer.out	0.012346	0.205662	0.109004	0.212189	0.299374	0.0435925	0.159559	0.144222	0.15189	0.0747448	0.108213	0.0909205	0.0137369	0.042909	0.0275173					2.66454	2.47122	2.56788	2.88907	2.37751	2.63329				2.51733	2.53266	2.525	2.60214	2.56867	2.58597	2.66315	2.63398	2.64937					61_Pentane-AcOH_1.05_dimer.out	61_Pentane-AcOH_1.05.xyz	-426.29	-424.334	-426.177	-424.308
2.46742	61_Pentane-AcOH_1.10_dimer.out	0.0086649	0.175457	0.0920611	0.176668	0.267972	0.0456516	0.130176	0.114802	0.122489	0.0265229	0.0530711	0.0393086	0.0270069	0.00519004	0.0167928					2.45876	2.29197	2.37536	2.64409	2.19945	2.42177				2.33725	2.35262	2.34493	2.4409	2.41435	2.42811	2.49443	2.47261	2.48422					61_Pentane-AcOH_1.10_dimer.out	61_Pentane-AcOH_1.10.xyz	-426.29	-424.335	-426.176	-424.308
1.75749	61_Pentane-AcOH_1.25_dimer.out	0.0525014	0.160031	0.106266	0.0793725	0.215339	0.0679833	0.138962	0.12377	0.131366	0.021238	0.00757137	0.0147655	0.0579743	0.046778	0.0529199					1.70499	1.59746	1.65122	1.83686	1.54215	1.6895				1.61853	1.63372	1.62612	1.77873	1.76506	1.77225	1.81546	1.80427	1.81041					61_Pentane-AcOH_1.25_dimer.out	61_Pentane-AcOH_1.25.xyz	-426.289	-424.336	-426.175	-424.309
0.772646	61_Pentane-AcOH_1.50_dimer.out	0.0205023	0.0645814	0.0425418	0.0419238	0.0679207	0.0129985	0.0614309	0.062392	0.0619114	0.0335892	0.00928543	0.0217196	0.0504202	0.0288858	0.040052					0.752143	0.708064	0.730104	0.814569	0.704725	0.759647				0.711215	0.710254	0.710734	0.806235	0.781931	0.794365	0.823066	0.801531	0.812698					61_Pentane-AcOH_1.50_dimer.out	61_Pentane-AcOH_1.50.xyz	-426.287	-424.336	-426.173	-424.309
0.165994	61_Pentane-AcOH_2.00_dimer.out	0.00207721	0.00849959	0.0052884	0.00471916	0.00309348	0.000812838	0.00653315	0.012044	0.00928858	0.0121761	0.00226155	0.00506035	0.0196038	0.00411199	0.0120346					0.163916	0.157494	0.160705	0.170713	0.1629	0.166806				0.15946	0.153949	0.156705	0.17817	0.163732	0.171054	0.185597	0.170106	0.178028					61_Pentane-AcOH_2.00_dimer.out	61_Pentane-AcOH_2.00.xyz	-426.286	-424.336	-426.172	-424.309
3.07359	62_Pentane-AcNH2_0.90_dimer.out	0.039993	0.355882	0.197937	0.213706	0.627935	0.207115	0.206327	0.177514	0.19192	0.127068	0.161099	0.143373	0.00363919	0.0313199	0.0164464					3.0336	2.71771	2.87565	3.2873	2.44565	2.86648				2.86726	2.89608	2.88167	2.94652	2.91249	2.93022	3.06995	3.04227	3.05714					62_Pentane-AcNH2_0.90_dimer.out	62_Pentane-AcNH2_0.90.xyz	-406.422	-404.485	-406.314	-404.46
3.42638	62_Pentane-AcNH2_0.95_dimer.out	0.0371679	0.301422	0.169295	0.204072	0.506312	0.15112	0.195333	0.16709	0.181211	0.122239	0.151974	0.13645	0.0165259	0.039348	0.0270057					3.38921	3.12496	3.25709	3.63045	2.92007	3.27526				3.23105	3.25929	3.24517	3.30414	3.27441	3.28993	3.40986	3.38703	3.39938					62_Pentane-AcNH2_0.95_dimer.out	62_Pentane-AcNH2_0.95.xyz	-406.423	-404.488	-406.314	-404.463
3.43722	62_Pentane-AcNH2_1.00_dimer.out	0.022528	0.247448	0.134988	0.194961	0.401069	0.103054	0.165121	0.146728	0.155925	0.100807	0.137441	0.118503	0.0112717	0.0449406	0.0271738					3.41469	3.18977	3.30223	3.63218	3.03615	3.33416				3.2721	3.29049	3.28129	3.33641	3.29978	3.31871	3.42594	3.39228	3.41004					62_Pentane-AcNH2_1.00_dimer.out	62_Pentane-AcNH2_1.00.xyz	-406.423	-404.49	-406.314	-404.465
3.25919	62_Pentane-AcNH2_1.05_dimer.out	0.00687041	0.196485	0.101678	0.197394	0.319938	0.0612718	0.140793	0.115545	0.128169	0.0902674	0.116629	0.102868	0.0214173	0.0442501	0.0319863					3.25232	3.06271	3.15751	3.45658	2.93925	3.19792				3.1184	3.14365	3.13102	3.16892	3.14256	3.15632	3.23777	3.21494	3.2272					62_Pentane-AcNH2_1.05_dimer.out	62_Pentane-AcNH2_1.05.xyz	-406.423	-404.491	-406.314	-404.466
2.98775	62_Pentane-AcNH2_1.10_dimer.out	0.0458697	0.207271	0.12657	0.135445	0.310307	0.0874307	0.164746	0.139717	0.152232	0.0461976	0.0657081	0.0554316	0.0103249	0.00336095	0.0042116					2.94188	2.78048	2.86118	3.12319	2.67744	2.90032				2.823	2.84803	2.83552	2.94155	2.92204	2.93232	2.99807	2.98439	2.99196					62_Pentane-AcNH2_1.10_dimer.out	62_Pentane-AcNH2_1.10.xyz	-406.422	-404.492	-406.314	-404.466
2.07844	62_Pentane-AcNH2_1.25_dimer.out	0.116474	0.213098	0.164786	0.0212834	0.260066	0.119391	0.206792	0.182305	0.194548	0.000582343	0.00699215	0.00279593	0.0404801	0.040717	0.0411379					1.96197	1.86534	1.91365	2.09972	1.81837	1.95905				1.87165	1.89614	1.88389	2.07902	2.07145	2.07564	2.11892	2.11916	2.11958					62_Pentane-AcNH2_1.25_dimer.out	62_Pentane-AcNH2_1.25.xyz	-406.421	-404.492	-406.312	-404.467
1.02451	62_Pentane-AcNH2_1.50_dimer.out	0.0376185	0.0878556	0.062737	0.0212463	0.103725	0.0412392	0.0762123	0.0774512	0.0768318	0.0457993	0.0146167	0.0305701	0.0684675	0.0393788	0.0544593					0.986888	0.93665	0.961769	1.04575	0.920781	0.983267				0.948294	0.947055	0.947674	1.07031	1.03912	1.05508	1.09297	1.06388	1.07897					62_Pentane-AcNH2_1.50_dimer.out	62_Pentane-AcNH2_1.50.xyz	-406.419	-404.493	-406.31	-404.467
0.268049	62_Pentane-AcNH2_2.00_dimer.out	0.00769724	0.0151819	0.00374232	0.010921	0.012424	0.00075153	0.00558367	0.01699	0.00570319	0.033768	0.00195643	0.0160578	0.0417636	0.00624535	0.024235					0.275747	0.252868	0.264307	0.27897	0.255625	0.267298				0.273633	0.251059	0.262346	0.301817	0.266093	0.284107	0.309813	0.274295	0.292284					62_Pentane-AcNH2_2.00_dimer.out	62_Pentane-AcNH2_2.00.xyz	-406.418	-404.492	-406.309	-404.467
2.54659	63_Benzene-AcOH_0.90_dimer.out	0.521846	0.0677678	0.294807	1.0492	0.223886	0.412658	0.176093	0.258986	0.217539	0.103443	0.0888665	0.0954828	0.000360891	0.0110457	0.0063907					3.06844	2.61436	2.8414	3.5958	2.32271	2.95925				2.72268	2.80558	2.76413	2.44315	2.45773	2.45111	2.54623	2.55764	2.55298					63_Benzene-AcOH_0.90_dimer.out	63_Benzene-AcOH_0.90.xyz	-460.711	-458.706	-460.592	-458.678
3.44386	63_Benzene-AcOH_0.95_dimer.out	0.479418	0.100197	0.289807	0.947388	0.0999742	0.423707	0.172601	0.231436	0.202018	0.086415	0.0989915	0.0919919	0.00261122	0.02433	0.0122752					3.92328	3.54406	3.73367	4.39125	3.34389	3.86757				3.61646	3.6753	3.64588	3.35745	3.34487	3.35187	3.44125	3.41953	3.43159					63_Benzene-AcOH_0.95_dimer.out	63_Benzene-AcOH_0.95.xyz	-460.713	-458.71	-460.593	-458.682
3.67136	63_Benzene-AcOH_1.00_dimer.out	0.451138	0.136798	0.293968	0.815839	0.069587	0.373126	0.212027	0.272112	0.24207	0.0192398	0.0171742	0.0188352	0.085988	0.0809209	0.0844306					4.1225	3.80816	3.96533	4.4872	3.60178	4.04449				3.88339	3.94347	3.91343	3.6906	3.68854	3.6902	3.75735	3.75228	3.75579					63_Benzene-AcOH_1.00_dimer.out	63_Benzene-AcOH_1.00.xyz	-460.713	-458.712	-460.593	-458.685
3.54622	63_Benzene-AcOH_1.05_dimer.out	0.376549	0.11858	0.247564	0.738281	0.00804461	0.365118	0.139385	0.201599	0.170492	0.030718	0.0302857	0.0298714	0.0216362	0.0164335	0.0200526					3.92277	3.6648	3.79378	4.2845	3.53817	3.91134				3.6856	3.74782	3.71671	3.5155	3.51593	3.51635	3.56785	3.56265	3.56627					63_Benzene-AcOH_1.05_dimer.out	63_Benzene-AcOH_1.05.xyz	-460.713	-458.714	-460.593	-458.686
3.25335	63_Benzene-AcOH_1.10_dimer.out	0.279747	0.0678248	0.173786	0.60008	0.0282924	0.285894	0.0697258	0.130843	0.100284	0.0230289	0.0120809	0.0170304	0.0157877	0.0250289	0.0212134					3.5331	3.32117	3.42713	3.85343	3.22506	3.53924				3.32307	3.38419	3.35363	3.23032	3.24127	3.23632	3.26914	3.27838	3.27456					63_Benzene-AcOH_1.10_dimer.out	63_Benzene-AcOH_1.10.xyz	-460.712	-458.715	-460.592	-458.687
2.19512	63_Benzene-AcOH_1.25_dimer.out	0.14273	0.0283098	0.0855198	0.358927	0.0167184	0.171104	0.000983828	0.0578318	0.0294078	0.0599812	0.0785719	0.0697124	0.0835327	0.104806	0.094793					2.33785	2.22343	2.28064	2.55404	2.1784	2.36622				2.1961	2.25295	2.22452	2.2551	2.27369	2.26483	2.27865	2.29992	2.28991					63_Benzene-AcOH_1.25_dimer.out	63_Benzene-AcOH_1.25.xyz	-460.71	-458.715	-460.59	-458.687
1.00733	63_Benzene-AcOH_1.50_dimer.out	0.0484862	0.000992163	0.023747	0.152115	0.00486461	0.0736253	0.0194565	0.00154674	0.00895488	0.0724672	0.0689458	0.0710009	0.0905112	0.0907118	0.0910131					1.05581	1.00634	1.03108	1.15944	1.00246	1.08095				0.987872	1.00888	0.998374	1.0798	1.07627	1.07833	1.09784	1.09804	1.09834					63_Benzene-AcOH_1.50_dimer.out	63_Benzene-AcOH_1.50.xyz	-460.708	-458.715	-460.588	-458.687
0.258702	63_Benzene-AcOH_2.00_dimer.out	0.0123536	0.00595839	0.009156	0.0568764	0.000108902	0.0284927	0.0168371	0.00979351	0.00352177	0.00224924	0.0193305	0.00860005	0.00193876	0.0254681	0.0137647					0.271056	0.26466	0.267858	0.315578	0.258811	0.287195				0.241865	0.268496	0.25518	0.256453	0.278032	0.267302	0.260641	0.28417	0.272467					63_Benzene-AcOH_2.00_dimer.out	63_Benzene-AcOH_2.00.xyz	-460.707	-458.714	-460.587	-458.687
2.52687	64_Peptide-Ethene_0.90_dimer.out	0.0557652	0.171172	0.0577031	0.198992	0.396792	0.0988998	0.0381392	0.0232473	0.0306932	0.0848997	0.0809888	0.0828368	0.0242565	0.0102307	0.0172213					2.58263	2.3557	2.46916	2.72586	2.13008	2.42797				2.48873	2.50362	2.49617	2.44197	2.44588	2.44403	2.50261	2.51664	2.50965					64_Peptide-Ethene_0.90_dimer.out	64_Peptide-Ethene_0.90.xyz	-326.672	-325.184	-326.586	-325.164
2.88149	64_Peptide-Ethene_0.95_dimer.out	0.066033	0.125655	0.0298109	0.207596	0.295289	0.0438465	0.0267804	0.014437	0.0206087	0.0823404	0.0819973	0.0820526	0.0282683	0.0181828	0.02319					2.94752	2.75584	2.85168	3.08909	2.5862	2.83764				2.85471	2.86705	2.86088	2.79915	2.79949	2.79944	2.85322	2.86331	2.8583					64_Peptide-Ethene_0.95_dimer.out	64_Peptide-Ethene_0.95.xyz	-326.673	-325.186	-326.586	-325.166
2.9279	64_Peptide-Ethene_1.00_dimer.out	0.043521	0.11833	0.0374043	0.17996	0.244474	0.0322569	0.0459331	0.0356252	0.0407791	0.0724211	0.0730616	0.0726286	0.023758	0.0136212	0.0186736					2.97143	2.80957	2.8905	3.10786	2.68343	2.89565				2.88197	2.89228	2.88713	2.85548	2.85484	2.85528	2.90415	2.91428	2.90923					64_Peptide-Ethene_1.00_dimer.out	64_Peptide-Ethene_1.00.xyz	-326.673	-325.187	-326.586	-325.167
2.80104	64_Peptide-Ethene_1.05_dimer.out	0.0359649	0.101018	0.0325265	0.153862	0.200702	0.0234197	0.0413326	0.0356617	0.0384972	0.0494386	0.056208	0.0526891	0.0123357	0.00938264	0.010798					2.837	2.70002	2.76851	2.9549	2.60033	2.77762				2.7597	2.76537	2.76254	2.7516	2.74483	2.74835	2.7887	2.79165	2.79024					64_Peptide-Ethene_1.05_dimer.out	64_Peptide-Ethene_1.05.xyz	-326.673	-325.188	-326.586	-325.168
2.58541	64_Peptide-Ethene_1.10_dimer.out	0.0321486	0.0836972	0.0257743	0.146743	0.153075	0.00316622	0.0429835	0.0382104	0.040597	0.0443246	0.0550732	0.0495291	0.0154268	0.0176906	0.0164287					2.61756	2.50171	2.55963	2.73215	2.43233	2.58224				2.54242	2.5472	2.54481	2.54108	2.53033	2.53588	2.56998	2.56772	2.56898					64_Peptide-Ethene_1.10_dimer.out	64_Peptide-Ethene_1.10.xyz	-326.672	-325.188	-326.586	-325.168
1.8281	64_Peptide-Ethene_1.25_dimer.out	0.0619564	0.130352	0.0961543	0.0165389	0.173125	0.0782931	0.113421	0.102309	0.107865	0.000983179	0.000471614	0.000425251	0.0201941	0.0272177	0.0238518					1.76614	1.69775	1.73195	1.84464	1.65498	1.74981				1.71468	1.72579	1.72024	1.82908	1.82763	1.82853	1.84829	1.85532	1.85195					64_Peptide-Ethene_1.25_dimer.out	64_Peptide-Ethene_1.25.xyz	-326.671	-325.189	-326.584	-325.168
0.866895	64_Peptide-Ethene_1.50_dimer.out	0.0197513	0.0485336	0.0341425	0.0304087	0.0625501	0.0160707	0.052638	0.0393439	0.0459909	0.024122	0.0254922	0.0249591	0.0323206	0.0365929	0.0346532					0.847144	0.818362	0.832753	0.897304	0.804345	0.850825				0.814257	0.827551	0.820904	0.891017	0.892387	0.891854	0.899216	0.903488	0.901548					64_Peptide-Ethene_1.50_dimer.out	64_Peptide-Ethene_1.50.xyz	-326.669	-325.188	-326.583	-325.168
0.187642	64_Peptide-Ethene_2.00_dimer.out	0.000967714	0.00378163	0.00140696	0.0207974	0.00523179	0.00778283	0.0120333	0.00283086	0.0074321	0.000468922	0.00445569	0.0020435	0.00380896	0.00823944	0.0061107					0.18861	0.18386	0.186235	0.208439	0.18241	0.195425				0.175609	0.184811	0.18021	0.187173	0.192098	0.189685	0.191451	0.195881	0.193753					64_Peptide-Ethene_2.00_dimer.out	64_Peptide-Ethene_2.00.xyz	-326.668	-325.188	-326.582	-325.167
3.66054	65_Pyridine-Ethyne_0.90_dimer.out	0.0369319	0.126045	0.0445566	0.128518	0.310255	0.0908683	0.0231155	0.0052708	0.0141931	0.0292222	0.0358314	0.0322604	0.0124576	0.0125005	0.0127876					3.69747	3.53449	3.61598	3.78905	3.35028	3.56967				3.63742	3.65527	3.64634	3.63131	3.62471	3.62828	3.67299	3.67304	3.67332					65_Pyridine-Ethyne_0.90_dimer.out	65_Pyridine-Ethyne_0.90.xyz	-325.125	-323.648	-325.043	-323.63
4.00764	65_Pyridine-Ethyne_0.95_dimer.out	0.031948	0.107318	0.0376849	0.123488	0.24886	0.0626861	0.0280686	0.014518	0.0212933	0.0340277	0.0412321	0.037404	0.00129428	0.00030073	0.00104982					4.03959	3.90033	3.96996	4.13113	3.75878	3.94496				3.97957	3.99313	3.98635	3.97362	3.96641	3.97024	4.00894	4.00794	4.00869					65_Pyridine-Ethyne_0.95_dimer.out	65_Pyridine-Ethyne_0.95.xyz	-325.125	-323.65	-325.044	-323.631
4.06567	65_Pyridine-Ethyne_1.00_dimer.out	0.0260613	0.0926273	0.033283	0.108119	0.213484	0.0526822	0.0277388	0.0133897	0.0205642	0.0278785	0.0260919	0.0268474	0.00608735	0.013428	0.00989101					4.09173	3.97305	4.03239	4.17379	3.85219	4.01299				4.03793	4.05228	4.04511	4.03779	4.03958	4.03883	4.07176	4.0791	4.07556					65_Pyridine-Ethyne_1.00_dimer.out	65_Pyridine-Ethyne_1.00.xyz	-325.125	-323.65	-325.044	-323.632
3.94577	65_Pyridine-Ethyne_1.05_dimer.out	0.0209926	0.0788007	0.0289041	0.0969056	0.17881	0.040952	0.0287786	0.0132315	0.021005	0.018092	0.0133706	0.0156097	0.0128179	0.0234617	0.0182438					3.96677	3.86697	3.91687	4.04268	3.76696	3.90482				3.91699	3.93254	3.92477	3.92768	3.9324	3.93016	3.95859	3.96923	3.96402					65_Pyridine-Ethyne_1.05_dimer.out	65_Pyridine-Ethyne_1.05.xyz	-325.125	-323.65	-325.043	-323.632
3.72406	65_Pyridine-Ethyne_1.10_dimer.out	0.0171137	0.0717483	0.0273173	0.0925566	0.148986	0.0282148	0.0323493	0.0211086	0.026729	0.00358773	0.0118234	0.00774847	0.0318734	0.0457773	0.0388208					3.74118	3.65232	3.69675	3.81662	3.57508	3.69585				3.69171	3.70295	3.69733	3.72765	3.73589	3.73181	3.75594	3.76984	3.76288					65_Pyridine-Ethyne_1.10_dimer.out	65_Pyridine-Ethyne_1.10.xyz	-325.125	-323.65	-325.043	-323.632
2.8661	65_Pyridine-Ethyne_1.25_dimer.out	0.00377863	0.0543008	0.0252611	0.0625467	0.100478	0.0189656	0.0347517	0.0240255	0.0293886	0.0229208	0.0270269	0.0250624	0.0407358	0.0475519	0.0442521					2.86988	2.8118	2.84084	2.92865	2.76562	2.84713				2.83135	2.84207	2.83671	2.88902	2.89313	2.89116	2.90683	2.91365	2.91035					65_Pyridine-Ethyne_1.25_dimer.out	65_Pyridine-Ethyne_1.25.xyz	-325.123	-323.65	-325.042	-323.631
1.67923	65_Pyridine-Ethyne_1.50_dimer.out	0.00339654	0.0256967	0.0111501	0.0501214	0.0363914	0.00686499	0.0272379	0.0186848	0.0229614	0.0174707	0.0168052	0.0172514	0.0250557	0.0268068	0.0260723					1.68263	1.65353	1.66808	1.72935	1.64284	1.6861				1.65199	1.66055	1.65627	1.6967	1.69604	1.69648	1.70429	1.70604	1.7053					65_Pyridine-Ethyne_1.50_dimer.out	65_Pyridine-Ethyne_1.50.xyz	-325.122	-323.648	-325.04	-323.63
0.618433	65_Pyridine-Ethyne_2.00_dimer.out	0.00046151	0.00853223	0.00403536	0.0153118	0.00841932	0.00344625	0.00927486	0.00860626	0.00894056	0.00498855	0.00633469	0.00565814	0.00912104	0.0107105	0.0099119					0.618895	0.609901	0.614398	0.633745	0.610014	0.62188				0.609159	0.609827	0.609493	0.623422	0.624768	0.624092	0.627554	0.629144	0.628345					65_Pyridine-Ethyne_2.00_dimer.out	65_Pyridine-Ethyne_2.00.xyz	-325.12	-323.647	-325.038	-323.628
3.35962	66_MeNH2-Pyridine_0.90_dimer.out	0.245569	0.005224	0.125396	0.452984	0.270667	0.0911588	0.10958	0.186108	0.147844	0.0669556	0.0203175	0.0433576	0.00874633	0.0606732	0.0350465					3.60519	3.36484	3.48502	3.8126	3.08895	3.45078				3.4692	3.54573	3.50746	3.29266	3.3393	3.31626	3.36837	3.42029	3.39467					66_MeNH2-Pyridine_0.90_dimer.out	66_MeNH2-Pyridine_0.90.xyz	-343.645	-342.05	-343.556	-342.029
3.79562	66_MeNH2-Pyridine_0.95_dimer.out	0.227425	0.0191069	0.123266	0.439511	0.182882	0.128315	0.088374	0.151538	0.119956	0.0790106	0.0427467	0.06063	0.0114598	0.0298846	0.00950487					4.02305	3.81473	3.91889	4.23513	3.61274	3.92394				3.884	3.94716	3.91558	3.71661	3.75288	3.73499	3.78416	3.82551	3.80513					66_MeNH2-Pyridine_0.95_dimer.out	66_MeNH2-Pyridine_0.95.xyz	-343.645	-342.052	-343.557	-342.032
3.89254	66_MeNH2-Pyridine_1.00_dimer.out	0.199161	0.0218113	0.110486	0.398172	0.142442	0.127865	0.0686823	0.129501	0.0990918	0.0605188	0.0205747	0.0403536	0.0019149	0.0422741	0.0204058					4.0917	3.91435	4.00303	4.29071	3.7501	4.02041				3.96122	4.02204	3.99163	3.83202	3.87197	3.85219	3.89063	3.93481	3.91295					66_MeNH2-Pyridine_1.00_dimer.out	66_MeNH2-Pyridine_1.00.xyz	-343.645	-342.054	-343.557	-342.033
3.78432	66_MeNH2-Pyridine_1.05_dimer.out	0.226564	0.0693498	0.147957	0.415155	0.0537333	0.180711	0.102918	0.150047	0.126483	0.0492833	0.0255805	0.0372172	0.000935055	0.0243575	0.0120015					4.01088	3.85367	3.93228	4.19947	3.73059	3.96503				3.88724	3.93437	3.9108	3.73504	3.75874	3.7471	3.78338	3.80868	3.79632					66_MeNH2-Pyridine_1.05_dimer.out	66_MeNH2-Pyridine_1.05.xyz	-343.645	-342.055	-343.557	-342.034
3.56039	66_MeNH2-Pyridine_1.10_dimer.out	0.184688	0.0502748	0.117481	0.358281	0.0485082	0.154886	0.0708743	0.11504	0.0929573	0.0468039	0.020986	0.0337263	0.00848938	0.0201436	0.00603036					3.74508	3.61067	3.67787	3.91867	3.51188	3.71528				3.63126	3.67543	3.65335	3.51359	3.5394	3.52666	3.5519	3.58053	3.56642					66_MeNH2-Pyridine_1.10_dimer.out	66_MeNH2-Pyridine_1.10.xyz	-343.645	-342.055	-343.556	-342.035
2.67699	66_MeNH2-Pyridine_1.25_dimer.out	0.0781237	0.00620801	0.0359578	0.211109	0.0558199	0.0776444	0.00906594	0.0263193	0.00862666	0.0197657	0.000299651	0.00986107	0.00647582	0.0297721	0.0183284					2.75511	2.67078	2.71295	2.8881	2.62117	2.75464				2.66792	2.70331	2.68562	2.65723	2.67669	2.66713	2.68347	2.70676	2.69532					66_MeNH2-Pyridine_1.25_dimer.out	66_MeNH2-Pyridine_1.25.xyz	-343.643	-342.056	-343.554	-342.035
1.4875	66_MeNH2-Pyridine_1.50_dimer.out	0.0135796	0.0260043	0.00621239	0.103465	0.0421408	0.0306622	0.0453525	0.0154247	0.0303886	0.0243095	0.0443421	0.0344536	0.0400924	0.0638848	0.0521387					1.50108	1.4615	1.48129	1.59097	1.44536	1.51817				1.44215	1.47208	1.45712	1.51181	1.53185	1.52196	1.5276	1.55139	1.53964					66_MeNH2-Pyridine_1.50_dimer.out	66_MeNH2-Pyridine_1.50.xyz	-343.641	-342.055	-343.552	-342.035
0.490416	66_MeNH2-Pyridine_2.00_dimer.out	0.0122393	0.00185148	0.00704538	0.0476421	0.0037459	0.0219481	0.010972	0.00552131	0.00272536	0.0181398	0.0299251	0.0240921	0.0283142	0.0392753	0.0339076					0.502656	0.492268	0.497462	0.538058	0.48667	0.512364				0.479444	0.495938	0.487691	0.508556	0.520341	0.514508	0.518731	0.529692	0.524324					66_MeNH2-Pyridine_2.00_dimer.out	66_MeNH2-Pyridine_2.00.xyz	-343.64	-342.055	-343.551	-342.034

## Sheet: TightPNO
100		Tight (default, TcutPNO 1e-7)			Tight (TcutPNO 1e-6)			Tight (TcutPNO 1e-7)			VeryTight (TcutPNO 1e-8)			Tight (TcutPNO 1e-7)			Tight Extrap. {6,7}						1e-07
		DLPNO-CCSD(T1)/haVQZ			DLPNO-CCSD(T1)/haVTZ			DLPNO-CCSD(T1)/haVTZ			DLPNO-CCSD(T1)/haVTZ			DLPNO-CCSD(T1)/haV{T,Q}Z			DLPNO-CCSD(T1)/haVTZ			Tight {6,7}-{T,Q}Z			Tight{T,Q} + c1*[Tight-Normal]/T			Tight {6,7}-{T,Q}Z + c1*[Tight{6,7}-Normal]/T			Tight{T,Q} + c1*[vTight-Tight]/T			Tight {6,7}-{T,Q}Z + c1*[vTight-Tight]/T
		RAW	CP	Half	RAW	CP	Half	RAW	CP	Half	RAW	CP	Half	RAW	CP	Half	RAW	CP	Half	RAW	CP	Half	RAW	CP	Half	RAW	CP	Half	RAW	CP	half	RAW	CP	half
MAD	Full	0.0899519	0.151958	0.0884152	0.210732	0.401543	0.184093	0.270031	0.293726	0.152291	0.261511	0.273358	0.115446	0.100685	0.065718	0.0812508	0.315669	0.242563	0.158002	0.132568	0.0939144	0.11199	0.0994811	0.0653053	0.0793027	0.130652	0.0935122	0.111198	0.0875067	0.0358697	0.0605177	0.122425	0.0670552	0.0942781
RMSD	Full	0.123767	0.214817	0.12814	0.308583	0.562821	0.282642	0.409976	0.419231	0.217298	0.401775	0.379153	0.176234	0.145557	0.0954428	0.117216	0.470827	0.351186	0.22022	0.191269	0.136195	0.161829	0.143305	0.0965302	0.1163	0.190782	0.135712	0.161552	0.127968	0.0588747	0.0900172	0.171894	0.0965067	0.132542
	H bonds	0.0846819	0.283965	0.181495	0.154276	0.716007	0.427945	0.0803007	0.571752	0.289662	0.101968	0.50992	0.232261	0.132684	0.10008	0.116041	0.110558	0.500074	0.222543	0.176428	0.146003	0.160965	0.161706	0.109525	0.13722	0.161276	0.133937	0.150667	0.0801518	0.0451413	0.0587961	0.103247	0.0556412	0.0760685
	pi stack	0.21304	0.235252	0.11477	0.599515	0.615719	0.181343	0.806127	0.394974	0.262648	0.805898	0.344569	0.243396	0.236178	0.140595	0.183994	0.912802	0.289484	0.354624	0.306	0.20339	0.25232	0.18509	0.130704	0.149055	0.324587	0.218671	0.265453	0.210793	0.0794453	0.14231	0.28167	0.147911	0.213051
	London	0.113747	0.151081	0.0798984	0.267973	0.444515	0.163099	0.403986	0.296735	0.133626	0.377585	0.291478	0.0925531	0.127145	0.0682214	0.0930515	0.476125	0.226611	0.177222	0.173599	0.106336	0.137767	0.127635	0.0665621	0.0899937	0.17006	0.106683	0.136727	0.138878	0.0579051	0.0971825	0.194367	0.116013	0.15486
	mixed	0.105835	0.13055	0.0746207	0.245929	0.37118	0.138869	0.34095	0.262333	0.115033	0.321454	0.246557	0.0725773	0.106068	0.0750949	0.0854304	0.391823	0.21007	0.140683	0.136104	0.0930793	0.111609	0.0999038	0.0743836	0.0812898	0.136835	0.0940331	0.112415	0.109081	0.0613183	0.0806212	0.144992	0.0865286	0.114169
																																				Tight (default, TcutPNO 1e-7)			Tight (TcutPNO 1e-6)			Tight (default, TcutPNO 1e-7)			VeryTight (TcutPNO 1e-8)
		δΔΕ			δΔΕ			δΔΕ			δΔΕ			δΔΕ			δΔΕ			δΔΕ			δΔΕ			δΔΕ			δΔΕ			δΔΕ				ΔΕ			ΔΕ			ΔΕ			ΔΕ
silver		DLPNO-CCSD(T1)/haVQZ			DLPNO-CCSD(T1)/haVTZ			DLPNO-CCSD(T1)/haVTZ			DLPNO-CCSD(T1)/haVTZ			DLPNO-CCSD(T1)/haV{T,Q}Z			Tight Extrap. {6,7}			Tight {6,7}-{T,Q}Z			Tight{T,Q} + c1*[Tight-Normal]/T			Tight {6,7}-{T,Q}Z + c1*[Tight{6,7}-Normal]/T			Tight{T,Q} + c1*[vTight-Tight]/T			Tight {6,7}-{T,Q}Z + c1*[vTight-Tight]/T				DLPNO-CCSD(T1)/haVQZ			DLPNO-CCSD(T1)/haVTZ			DLPNO-CCSD(T1)/haVTZ			DLPNO-CCSD(T1)/haVTZ
sterling ref.
REF	systems	RAW	CP	Half	RAW	CP	Half	RAW	CP	Half	RAW	CP	Half	RAW	CP	Half	RAW	CP	Half	RAW	CP	Half	RAW	CP	Half	RAW	CP	Half	RAW	CP	half	RAW	CP	half		RAW	CP	Half	RAW	CP	Half	RAW	CP	Half	RAW	CP	Half
4.66552	01_Water-Water_0.90_dimer.out	0.0223624	0.200574	0.111468	0.0819661	0.534845	0.308406	0.0241864	0.461674	0.24293	0.00363821	0.435771	0.216067	0.0211665	0.0293879	0.0252772	0.00470345	0.425089	0.210193	0.0401077	0.0533746	0.0467411	0.0316116	0.0321717	0.0331642	0.0339609	0.0474638	0.0421455	0.0073482	0.00100462	0.00440833	0.00386658	0.01424	0.0076702		4.64316	4.46495	4.55406	4.58356	4.13068	4.35712	4.64134	4.20385	4.42259	4.66916	4.22975	4.44946
4.95383	01_Water-Water_0.95_dimer.out	0.0165815	0.165676	0.0911286	0.0521662	0.437557	0.244861	0.0113481	0.385752	0.19855	0.0179982	0.354726	0.168364	0.0200127	0.0213858	0.0206992	0.00906092	0.35985	0.175395	0.0333936	0.0383681	0.0358809	0.0288515	0.0237491	0.0273848	0.0283907	0.0335605	0.0321418	0.0100615	0.0126121	0.0126582	0.00482959	0.00850777	0.00802283		4.93725	4.78816	4.8627	4.90167	4.51628	4.70897	4.94248	4.56808	4.75528	4.97183	4.59911	4.78547
4.94643	01_Water-Water_1.00_dimer.out	0.0137146	0.140055	0.0768849	0.0468704	0.37492	0.210895	0.00575029	0.315486	0.154868	0.034094	0.284905	0.125405	0.0264765	0.0250369	0.0257567	0.0320606	0.285769	0.126854	0.0437265	0.0445205	0.0441235	0.0339978	0.0270277	0.0314153	0.0390295	0.0401485	0.0406722	0.00257017	0.00847276	0.00680055	0.00680927	0.00168233	0.00127292		4.93272	4.80638	4.86955	4.89956	4.57151	4.73554	4.95218	4.63095	4.79157	4.98053	4.66153	4.82103
4.76207	01_Water-Water_1.05_dimer.out	0.0110373	0.120026	0.0655314	0.0274531	0.309424	0.168439	0.0196238	0.256544	0.11846	0.0438176	0.230574	0.0933781	0.0311397	0.0305196	0.0308296	0.0431622	0.230103	0.0934706	0.0465723	0.0478548	0.0472135	0.0372606	0.0321646	0.0354719	0.0426452	0.0441653	0.0443137	0.00634576	0.0020628	0.00311309	0.0150601	0.00861876	0.0107341		4.75104	4.64205	4.69654	4.73462	4.45265	4.59363	4.7817	4.50553	4.64361	4.80589	4.5315	4.66869
4.47984	01_Water-Water_1.10_dimer.out	0.00885129	0.102474	0.0556627	0.00603199	0.250859	0.128446	0.033558	0.204612	0.0855272	0.051468	0.185779	0.0671557	0.0366563	0.0355089	0.0360826	0.0533529	0.181489	0.0640681	0.0496345	0.0506693	0.0501519	0.0420702	0.0369487	0.0401659	0.0462114	0.0474408	0.047619	0.018302	0.0148725	0.0157813	0.026307	0.022216	0.0234322		4.47099	4.37736	4.42417	4.47381	4.22898	4.35139	4.5134	4.27523	4.39431	4.53131	4.29406	4.41268
3.4705	01_Water-Water_1.25_dimer.out	0.00675716	0.0644702	0.0356137	0.0282802	0.130239	0.0509794	0.0468566	0.106926	0.0300347	0.0619547	0.0919791	0.0150122	0.0419082	0.0366347	0.0392715	0.0561448	0.0952694	0.0195623	0.0479979	0.0442772	0.0461375	0.0514771	0.03905	0.0462941	0.0432115	0.0399684	0.0426817	0.0264357	0.0202566	0.022671	0.0283328	0.0216951	0.0242887		3.46374	3.40603	3.43488	3.49878	3.34026	3.41952	3.51735	3.36357	3.44046	3.53245	3.37852	3.45548
2.11656	01_Water-Water_1.50_dimer.out	0.0027171	0.0273011	0.012292	0.0377113	0.0448604	0.00357454	0.0427158	0.038305	0.0022054	0.0460224	0.0341048	0.00595881	0.0235074	0.0200866	0.021797	0.045218	0.0350273	0.00509537	0.025148	0.0222356	0.0236918	0.0269628	0.0210236	0.0244303	0.0234615	0.0206147	0.0224312	0.0201187	0.0154842	0.0176493	0.0208411	0.0158899	0.0182328		2.11928	2.08926	2.10427	2.15428	2.0717	2.11299	2.15928	2.07826	2.11877	2.16259	2.08246	2.12252
0.874474	01_Water-Water_2.00_dimer.out	0.00117198	0.0107334	0.00595269	0.0197217	0.0107788	0.00447146	0.0232894	0.00743375	0.00792785	0.0257235	0.00482657	0.0104485	0.0172097	0.0128967	0.0150532	0.0250733	0.00576123	0.00965604	0.0183793	0.0139933	0.0161863	0.0176128	0.0130511	0.0154281	0.0181092	0.01368	0.015962	0.0147153	0.0100399	0.0122678	0.015209	0.0100543	0.0125203		0.873302	0.863741	0.868521	0.894196	0.863695	0.878946	0.897764	0.86704	0.882402	0.900198	0.869648	0.884923
5.29836	02_Water-MeOH_0.90_dimer.out	0.0250732	0.25258	0.138827	0.0885182	0.668665	0.378592	0.00202649	0.566008	0.284017	0.0341074	0.528404	0.247148	0.0401835	0.0470857	0.0436346	0.0412194	0.51468	0.23673	0.068537	0.0807383	0.0746376	0.0542622	0.0505539	0.0538388	0.0600401	0.07314	0.0685239	0.00315345	0.00588038	0.0028927	0.0214732	0.0239248	0.0210148		5.27329	5.04578	5.15954	5.20984	4.6297	4.91977	5.29634	4.73235	5.01435	5.33247	4.76996	5.05121
5.62873	02_Water-MeOH_0.95_dimer.out	0.0210225	0.214013	0.117518	0.065737	0.561005	0.313371	0.00237443	0.477843	0.237734	0.0458784	0.435504	0.194813	0.0363624	0.0410373	0.0386998	0.0364301	0.436261	0.199916	0.0586904	0.0682995	0.063495	0.0494113	0.0442748	0.0481922	0.0511115	0.0614649	0.0580179	0.00822055	0.00535516	0.00872973	0.00202727	0.00433397	0.00107005		5.60771	5.41472	5.51121	5.563	5.06773	5.31536	5.63111	5.15089	5.391	5.67461	5.19323	5.43392
5.62675	02_Water-MeOH_1.00_dimer.out	0.016217	0.181271	0.0987438	0.0515728	0.476462	0.264017	0.0107553	0.399607	0.194426	0.0546534	0.357395	0.151371	0.0339009	0.0381215	0.0360112	0.0419193	0.36118	0.15963	0.0543331	0.0633158	0.0588245	0.0440817	0.0407104	0.0435117	0.0481942	0.0576392	0.0543293	0.0110859	0.00813287	0.0115665	0.00284339	0.000459378	0.00379545		5.61054	5.44548	5.52801	5.57518	5.15029	5.36274	5.63751	5.22715	5.43233	5.68141	5.26936	5.47538
5.42332	02_Water-MeOH_1.05_dimer.out	0.013592	0.156537	0.0850646	0.0417793	0.405419	0.223599	0.0215556	0.331286	0.154865	0.0612577	0.292781	0.115762	0.036636	0.0419661	0.039301	0.053223	0.294219	0.120498	0.0573983	0.0662682	0.0618333	0.0457054	0.0442367	0.0459293	0.0517374	0.0611522	0.0577376	0.00405085	0.000225523	0.00390974	0.00568683	0.00809487	0.00496094		5.40973	5.26678	5.33826	5.38154	5.0179	5.19972	5.44488	5.09203	5.26846	5.48458	5.13054	5.30756
5.10642	02_Water-MeOH_1.10_dimer.out	0.0116636	0.135282	0.073473	0.0233923	0.337013	0.180203	0.0316448	0.272627	0.120491	0.0654853	0.239398	0.0869563	0.0400582	0.0452341	0.0426461	0.0591634	0.240435	0.0906357	0.0581003	0.0663408	0.0622205	0.0479888	0.0471712	0.0483695	0.0531587	0.0619529	0.0586779	0.00537842	0.00882235	0.00558848	0.0140237	0.0161366	0.0134467		5.09475	4.97113	5.03294	5.08302	4.7694	4.92621	5.13806	4.83379	4.98593	5.1719	4.86702	5.01946
3.95632	02_Water-MeOH_1.25_dimer.out	0.00785284	0.087399	0.0476259	0.0118569	0.187787	0.0879651	0.0382072	0.155807	0.0587998	0.0631401	0.131576	0.0342178	0.0380514	0.0425484	0.0402999	0.0513824	0.139817	0.0442172	0.0466895	0.0530321	0.0498608	0.050925	0.0455804	0.0494215	0.0402168	0.0475677	0.0453386	0.0125001	0.0159968	0.0131357	0.0142148	0.0164229	0.0141083		3.94847	3.86892	3.9087	3.96818	3.76853	3.86836	3.99453	3.80051	3.89752	4.01946	3.82475	3.9221
2.39149	02_Water-MeOH_1.50_dimer.out	0.0116756	0.0322837	0.010304	0.0296461	0.0640885	0.0172212	0.0365589	0.0541999	0.00882053	0.0355645	0.0568415	0.0106385	0.00463871	0.0179146	0.0112767	0.0400152	0.0492556	0.00462018	0.00690484	0.0211563	0.0140306	0.0107424	0.0194204	0.0157038	0.00397322	0.0185648	0.0119338	0.0056578	0.0208091	0.0132856	0.00820005	0.0251472	0.0166746		2.40317	2.35921	2.38119	2.42114	2.3274	2.37427	2.42805	2.33729	2.38267	2.42706	2.33465	2.38085
0.954245	02_Water-MeOH_2.00_dimer.out	0.0023142	0.0117212	0.00470351	0.00627545	0.0215384	0.00763148	0.0123326	0.0153283	0.00149781	0.0128642	0.0153227	0.00122923	0.00425423	0.00935631	0.00680527	0.0153612	0.0122232	0.00156903	0.00623988	0.0113921	0.00881599	0.00557505	0.00966478	0.00773723	0.00549332	0.0107759	0.00830026	0.00370945	0.00935023	0.00650849	0.00554749	0.0113837	0.00842538		0.95656	0.942524	0.949542	0.960521	0.932707	0.946614	0.966578	0.938917	0.952748	0.96711	0.938923	0.953016
6.60638	03_Water-MeNH2_0.90_dimer.out	0.0328827	0.237694	0.135288	0.111038	0.67072	0.390879	0.0306431	0.573482	0.302063	0.00543993	0.537439	0.265999	0.034351	0.01754	0.0259455	0.00955409	0.524863	0.257655	0.0607057	0.0494163	0.055061	0.0472468	0.0208509	0.0354938	0.052894	0.042178	0.0493348	0.00262698	0.0219553	0.0139061	0.0137081	0.00503943	0.00260994		6.5735	6.36869	6.47109	6.49535	5.93566	6.2155	6.57574	6.0329	6.30432	6.61182	6.06894	6.34038
6.95721	03_Water-MeNH2_0.95_dimer.out	0.0321829	0.20234	0.117262	0.0890162	0.569414	0.329215	0.0198651	0.486277	0.253071	0.0136171	0.454945	0.220664	0.0402589	0.0161815	0.0282202	0.0147105	0.444709	0.214999	0.0629278	0.043435	0.0531814	0.0517183	0.0190773	0.0366355	0.0560425	0.0371431	0.048171	0.00594631	0.0181509	0.00759102	0.0193178	0.0039021	0.00604814		6.92503	6.75487	6.83995	6.8682	6.3878	6.628	6.93735	6.47093	6.70414	6.97083	6.50227	6.73655
6.94056	03_Water-MeNH2_1.00_dimer.out	0.0301451	0.173081	0.101613	0.0760207	0.487024	0.281522	0.0102355	0.409592	0.209914	0.0206212	0.382328	0.180854	0.0431986	0.0180159	0.0306072	0.0226571	0.370876	0.174109	0.0647641	0.0433994	0.0540818	0.0536299	0.0206603	0.0382802	0.0584267	0.0376229	0.0494762	0.0115765	0.0118585	0.0015055	0.0245737	0.00220895	0.0118163		6.91041	6.76748	6.83895	6.86454	6.45354	6.65904	6.93032	6.53097	6.73065	6.96118	6.55823	6.75971
6.69539	03_Water-MeNH2_1.05_dimer.out	0.031819	0.15332	0.0925694	0.0611406	0.410885	0.236013	0.00948204	0.351392	0.180437	0.0238877	0.320794	0.148453	0.0464639	0.0234567	0.0349603	0.0163472	0.321645	0.152649	0.0633985	0.0429596	0.053179	0.0546966	0.025463	0.0408947	0.0584033	0.0385618	0.0496137	0.0122665	0.0100715	0.000383322	0.0199349	0.00326885	0.00666114		6.66357	6.54207	6.60282	6.63425	6.28451	6.45938	6.68591	6.344	6.51496	6.71928	6.3746	6.54694
6.31753	03_Water-MeNH2_1.10_dimer.out	0.0274779	0.131316	0.0793968	0.0519042	0.349601	0.200753	0.00331608	0.295967	0.149641	0.027582	0.2657	0.119059	0.0433192	0.0233647	0.0333419	0.020978	0.26915	0.124086	0.0592472	0.040947	0.0500971	0.0511593	0.0252429	0.0389448	0.0545051	0.036872	0.0467542	0.0116548	0.00980071	0.000453047	0.019003	0.00478111	0.00561751		6.29005	6.18621	6.23813	6.26562	5.96792	6.11677	6.31421	6.02156	6.16788	6.34511	6.05183	6.19847
4.92823	03_Water-MeNH2_1.25_dimer.out	0.0158172	0.0828648	0.049341	0.0243301	0.213037	0.118684	0.0113328	0.171973	0.0803199	0.0291689	0.154598	0.0627144	0.0336176	0.0244426	0.0290301	0.0291643	0.15144	0.061138	0.0453085	0.0379043	0.0416064	0.0399755	0.0259995	0.0336243	0.041555	0.0345958	0.0389257	0.0153392	0.00540372	0.00957522	0.0220773	0.0116537	0.0160007		4.91241	4.84536	4.87888	4.9039	4.71519	4.80954	4.93956	4.75625	4.84791	4.95739	4.77363	4.86551
2.97972	03_Water-MeNH2_1.50_dimer.out	0.00761193	0.0413609	0.0244864	0.006463	0.0872532	0.0403951	0.0227556	0.068583	0.0229137	0.0273527	0.0675249	0.0200861	0.0275219	0.0235132	0.0255176	0.0309019	0.0592479	0.014173	0.0328629	0.0296336	0.0312483	0.0350754	0.0253813	0.0310033	0.0290447	0.0262879	0.0285296	0.0228108	0.0223537	0.0223929	0.0268753	0.0280349	0.0271357		2.9721	2.93836	2.95523	2.98618	2.89246	2.93932	3.00247	2.91113	2.9568	3.00707	2.91219	2.95963
1.14169	03_Water-MeNH2_2.00_dimer.out	0.00137162	0.0101343	0.00575296	0.00727313	0.0214528	0.00708982	0.0158997	0.0129468	0.00147645	0.0145306	0.0151665	0.000317978	0.0126953	0.00829029	0.0104928	0.020213	0.00869386	0.00575959	0.0155233	0.0110787	0.013301	0.0148896	0.00876557	0.0119852	0.0143183	0.0101509	0.0124965	0.0140984	0.0107226	0.0124757	0.0173066	0.0144323	0.0159108		1.14032	1.13155	1.13594	1.14896	1.12024	1.1346	1.15759	1.12874	1.14316	1.15622	1.12652	1.14137
7.73932	04_Water-Peptide_0.90_dimer.out	0.0680737	0.329219	0.198647	0.197286	0.885792	0.541539	0.0465381	0.728458	0.387498	0.0225929	0.655649	0.316528	0.0821932	0.0674645	0.0748289	0.0288359	0.649791	0.310478	0.131611	0.119041	0.125326	0.0970571	0.0712781	0.0858304	0.121179	0.109779	0.117848	0.0113476	0.0123173	0.0035963	0.041569	0.00903883	0.0221061		7.67125	7.4101	7.54068	7.54204	6.85353	7.19778	7.69278	7.01086	7.35182	7.76192	7.08367	7.4228
8.13066	04_Water-Peptide_0.95_dimer.out	0.0615134	0.286864	0.174189	0.175038	0.768248	0.471643	0.0363374	0.627904	0.332121	0.0321238	0.557727	0.262802	0.0780196	0.0632668	0.0706432	0.0330126	0.557733	0.26236	0.123488	0.109274	0.116381	0.0978492	0.0681053	0.0849461	0.111105	0.0987318	0.107693	0.0078605	0.0136305	0.00595739	0.0343183	0.00324847	0.0155622		8.06915	7.8438	7.95647	7.95562	7.36241	7.65902	8.09432	7.50276	7.79854	8.16278	7.57293	7.86786
8.12775	04_Water-Peptide_1.00_dimer.out	0.0522674	0.245242	0.148755	0.144384	0.660513	0.402448	0.0269708	0.538682	0.282826	0.0407132	0.471278	0.215283	0.0688528	0.0528523	0.0608526	0.0317356	0.477767	0.223015	0.107343	0.0927907	0.100067	0.0865533	0.0571526	0.0735917	0.0964468	0.0834805	0.0924077	0.00050992	0.021006	0.0137863	0.0191854	0.00904444	0.00183006		8.07548	7.88251	7.97899	7.98336	7.46723	7.7253	8.10078	7.58907	7.84492	8.16846	7.65647	7.91247
7.87768	04_Water-Peptide_1.05_dimer.out	0.0428649	0.210546	0.126705	0.143588	0.593225	0.368406	0.0101156	0.45465	0.232383	0.0522272	0.39255	0.170162	0.0643365	0.0505025	0.0574195	0.0566206	0.385362	0.164371	0.108091	0.0959298	0.10201	0.0799639	0.0542713	0.0686248	0.0977382	0.0871216	0.094749	0.000447435	0.0175437	0.0113375	0.0268905	0.00210825	0.0115151		7.83482	7.66714	7.75098	7.73409	7.28446	7.50928	7.86757	7.42303	7.6453	7.92991	7.48513	7.70752
7.48215	04_Water-Peptide_1.10_dimer.out	0.0371147	0.183092	0.110103	0.111936	0.504663	0.3083	0.00151819	0.388936	0.195227	0.0559397	0.332031	0.138045	0.0604529	0.0481333	0.0542931	0.0536908	0.331073	0.138691	0.0966498	0.0860705	0.0913602	0.0736059	0.0512714	0.0636732	0.0879835	0.0787293	0.0852951	0.00157001	0.014222	0.0088953	0.0218119	9.56871e-05	0.00819409		7.44504	7.29906	7.37205	7.37022	6.97749	7.17385	7.48063	7.09322	7.28693	7.53809	7.15012	7.34411
5.99425	04_Water-Peptide_1.25_dimer.out	0.0214399	0.12197	0.0717048	0.0410646	0.308949	0.175007	0.0244901	0.237584	0.106547	0.0616493	0.199272	0.0688113	0.0515532	0.0461692	0.0488612	0.0572674	0.201901	0.0723167	0.0730432	0.069564	0.0713036	0.0638214	0.0490433	0.057531	0.0658804	0.0635467	0.0663117	0.0134724	0.00418882	0.00716195	0.0246439	0.0116818	0.0164207		5.97281	5.87228	5.92254	5.95318	5.6853	5.81924	6.01874	5.75666	5.8877	6.0559	5.79497	5.92544
3.83009	04_Water-Peptide_1.50_dimer.out	0.0124448	0.0690185	0.0407316	0.00537322	0.141261	0.0733173	0.0206108	0.11101	0.0451995	0.0390386	0.094093	0.0275272	0.0341172	0.0414875	0.0378023	0.0336029	0.0958839	0.0311405	0.0426352	0.0514046	0.0470199	0.0450722	0.0440524	0.0455418	0.0370395	0.0467167	0.0431256	0.0152323	0.0229508	0.0182737	0.0186333	0.0258463	0.0213171		3.81765	3.76108	3.78936	3.82472	3.68883	3.75678	3.85071	3.71909	3.7849	3.86913	3.736	3.80257
1.43887	04_Water-Peptide_2.00_dimer.out	0.00990407	0.0247597	0.0173319	0.00543245	0.0350348	0.0148012	0.0123108	0.0270015	0.00734533	0.0141542	0.0260473	0.00594659	0.0244689	0.0232899	0.0238794	0.01575	0.0229848	0.00361741	0.0267237	0.0259233	0.0263235	0.0266456	0.0237637	0.0253635	0.0255697	0.0250073	0.0255416	0.0225798	0.0222444	0.0223337	0.0243228	0.0244818	0.0242892		1.42896	1.41411	1.42153	1.4443	1.40383	1.42406	1.45118	1.41186	1.43152	1.45302	1.41282	1.43292
5.38667	05_MeOH-MeOH_0.90_dimer.out	0.0424935	0.288121	0.165307	0.0976987	0.731064	0.414381	0.00962825	0.605372	0.297872	0.0638753	0.554627	0.245376	0.0766663	0.0801197	0.078393	0.0632917	0.542526	0.239617	0.11185	0.121324	0.116587	0.0966125	0.084816	0.0925239	0.100186	0.111306	0.108367	0.0210738	0.024515	0.0203825	0.041194	0.0446563	0.0402356		5.34417	5.09855	5.22136	5.28897	4.6556	4.97229	5.3963	4.7813	5.0888	5.45054	4.83204	5.14129
5.77098	05_MeOH-MeOH_0.95_dimer.out	0.0372563	0.247113	0.142184	0.0736192	0.617262	0.345441	0.0148856	0.513936	0.249525	0.0701295	0.45788	0.193875	0.0714423	0.0721744	0.0718083	0.0591381	0.462272	0.201567	0.100456	0.106047	0.103251	0.0883433	0.076092	0.0836893	0.0906324	0.0977211	0.0963746	0.0148283	0.0107509	0.010313	0.0285014	0.0213565	0.0223135		5.73372	5.52386	5.62879	5.69736	5.15372	5.42554	5.78586	5.25704	5.52145	5.84111	5.3131	5.5771
5.8036	05_MeOH-MeOH_1.00_dimer.out	0.0259188	0.206832	0.116376	0.0564716	0.522525	0.289498	0.0209568	0.430791	0.204917	0.0754462	0.378602	0.151578	0.0566522	0.0599976	0.0583249	0.059671	0.384923	0.162626	0.0820345	0.0900697	0.0860521	0.0711884	0.0634179	0.0686197	0.0735535	0.08277	0.0800685	0.000811321	0.00281159	0.000616877	0.011063	0.0112221	0.0084753		5.77768	5.59677	5.68723	5.74713	5.28108	5.5141	5.82456	5.37281	5.59869	5.87905	5.425	5.65203
5.62	05_MeOH-MeOH_1.05_dimer.out	0.01951	0.177146	0.0983282	0.0424997	0.444844	0.243672	0.0270827	0.363855	0.168386	0.0767884	0.314273	0.118742	0.0500577	0.0547338	0.0523957	0.0618738	0.323361	0.130744	0.072868	0.0812832	0.0770756	0.0627147	0.0576907	0.0613278	0.0654302	0.0749382	0.0718517	0.00088083	0.000403836	0.00246281	0.00812708	0.00637355	0.00487294		5.60049	5.44286	5.52168	5.5775	5.17516	5.37633	5.64709	5.25615	5.45162	5.69679	5.30573	5.50126
5.31207	05_MeOH-MeOH_1.10_dimer.out	0.0168473	0.152684	0.0847658	0.0292791	0.376293	0.202786	0.0345921	0.302466	0.133937	0.076989	0.258557	0.0907839	0.0505727	0.054482	0.0525273	0.0665276	0.265553	0.0995127	0.0715107	0.0786838	0.0750972	0.0616548	0.0570189	0.0602697	0.064926	0.0731515	0.070508	0.00712421	0.00636756	0.00484113	0.0162894	0.012344	0.0123345		5.29523	5.15939	5.22731	5.28279	4.93578	5.10929	5.34667	5.00961	5.17814	5.38906	5.05352	5.22129
4.15067	05_MeOH-MeOH_1.25_dimer.out	0.00506385	0.0912	0.048132	0.0107909	0.209125	0.0991672	0.0435687	0.168421	0.0624259	0.0648125	0.150393	0.0427901	0.036949	0.0405717	0.0387603	0.0599576	0.148068	0.0440553	0.0476941	0.0539154	0.0508048	0.0478265	0.043095	0.0464099	0.0419665	0.0490802	0.0468033	0.0151783	0.0208174	0.0170619	0.0200244	0.0266785	0.0222461		4.14561	4.05947	4.10254	4.16147	3.94155	4.05151	4.19424	3.98225	4.08825	4.21549	4.00028	4.10788
2.5284	05_MeOH-MeOH_1.50_dimer.out	0.0156	0.0332279	0.00881392	0.0290599	0.0753631	0.0231516	0.0413372	0.0582314	0.00844707	0.0368309	0.0672851	0.0152271	0.00127415	0.0168347	0.00905444	0.0474759	0.0496655	0.00109479	0.00529888	0.0224508	0.0138749	0.0098393	0.0188632	0.0151401	0.00112163	0.018882	0.0109388	0.00589226	0.0267554	0.0165467	0.0111683	0.0361294	0.0237358		2.544	2.49517	2.51958	2.55746	2.45303	2.50524	2.56973	2.47016	2.51995	2.56523	2.46111	2.51317
1.01101	05_MeOH-MeOH_2.00_dimer.out	0.00682699	0.0135723	0.00337266	0.0060449	0.0247812	0.00936817	0.0155353	0.0153057	0.00011483	0.0122207	0.0211414	0.00446035	0.0011175	0.0124359	0.00565918	0.0202806	0.0105679	0.00485633	0.00199363	0.0155421	0.00876787	0.000968948	0.0128897	0.00708112	0.000816235	0.0146286	0.00797886	0.00227938	0.0188304	0.010715	0.00631094	0.0243588	0.0154221		1.01784	0.997437	1.00764	1.01705	0.986228	1.00164	1.02654	0.995703	1.01112	1.02323	0.989868	1.00655
7.08127	06_MeOH-MeNH2_0.90_dimer.out	0.0701532	0.307977	0.189065	0.147901	0.834832	0.491367	0.00893169	0.682863	0.345897	0.0467657	0.621675	0.287455	0.110292	0.0621893	0.0862407	0.0605531	0.606878	0.273162	0.155849	0.112008	0.133928	0.122846	0.065227	0.0952573	0.146752	0.104086	0.127472	0.0532133	0.00485771	0.0216593	0.0833038	0.0195638	0.0489286		7.01112	6.77329	6.89221	6.93337	6.24644	6.5899	7.07234	6.39841	6.73537	7.12804	6.4596	6.79382
7.55441	06_MeOH-MeNH2_0.95_dimer.out	0.0651072	0.265461	0.165284	0.112896	0.706041	0.409468	0.00829932	0.57324	0.28247	0.0529473	0.524817	0.235935	0.113235	0.0636702	0.0884526	0.0688967	0.506839	0.218971	0.152965	0.107205	0.130085	0.124673	0.0664206	0.0966419	0.14481	0.100131	0.124308	0.0674798	0.0106105	0.0370291	0.0948117	0.0340465	0.0624032		7.4893	7.28895	7.38913	7.44152	6.84837	7.14494	7.56271	6.98117	7.27194	7.60736	7.02959	7.31848
7.60087	06_MeOH-MeNH2_1.00_dimer.out	0.0601078	0.227214	0.143661	0.0980244	0.608701	0.353363	0.011646	0.49011	0.239232	0.0571847	0.442838	0.192827	0.107152	0.0548497	0.0810009	0.0664812	0.430815	0.182167	0.143104	0.0937259	0.118415	0.117482	0.0573276	0.0883877	0.135733	0.087374	0.113211	0.0604841	0.00305057	0.0297209	0.0837907	0.0223057	0.0509222		7.54076	7.37365	7.4572	7.50284	6.99216	7.2475	7.61251	7.11075	7.36163	7.65805	7.15803	7.40804
7.37783	06_MeOH-MeNH2_1.05_dimer.out	0.0600793	0.20181	0.130945	0.0734836	0.511214	0.292349	0.00835989	0.421873	0.206757	0.0532754	0.376135	0.16143	0.10495	0.0575297	0.0812401	0.0492816	0.377203	0.163961	0.13178	0.0868172	0.109299	0.115096	0.0599293	0.0884439	0.125177	0.0811862	0.104662	0.058921	0.0074108	0.0311516	0.0732784	0.0177137	0.0433742		7.31775	7.17602	7.24688	7.30434	6.86661	7.08548	7.38619	6.95595	7.17107	7.4311	7.00169	7.2164
6.99427	06_MeOH-MeNH2_1.10_dimer.out	0.0565512	0.177345	0.116948	0.0632828	0.436338	0.24981	0.00706043	0.359421	0.17618	0.0544994	0.312031	0.128766	0.0982572	0.0579695	0.0781134	0.042232	0.320963	0.139365	0.121317	0.0831842	0.102251	0.108953	0.0605056	0.0857174	0.114748	0.07759	0.097641	0.0496418	0.00604152	0.0257184	0.0595285	0.0115864	0.0332905		6.93772	6.81693	6.87733	6.93099	6.55794	6.74446	7.00134	6.63485	6.81809	7.04877	6.68224	6.86551
5.50482	06_MeOH-MeNH2_1.25_dimer.out	0.0390578	0.118369	0.0787133	0.0393225	0.270328	0.154825	0.00625591	0.220856	0.1073	0.049882	0.180514	0.0653159	0.068767	0.0511746	0.0599708	0.0290451	0.19612	0.0835375	0.0837084	0.0673923	0.0755504	0.0774489	0.053234	0.0661444	0.0786595	0.0631147	0.0720166	0.024059	0.00696926	0.0135766	0.0268862	0.00644236	0.0144881		5.46577	5.38645	5.42611	5.4655	5.2345	5.35	5.51108	5.28397	5.39752	5.55471	5.32431	5.43951
3.34489	06_MeOH-MeNH2_1.50_dimer.out	0.00039987	0.0422692	0.0213345	0.0197821	0.0983564	0.0392872	0.0371903	0.077219	0.0200144	0.0352086	0.0841026	0.024447	0.0250453	0.0193549	0.0222001	0.0458944	0.0666503	0.010378	0.030752	0.0262841	0.0285181	0.0366925	0.0221851	0.0305834	0.0250541	0.0213612	0.0244902	0.0270761	0.0268977	0.0270983	0.0333331	0.036684	0.0349649		3.34449	3.30262	3.32355	3.36467	3.24653	3.3056	3.38208	3.26767	3.32487	3.3801	3.26079	3.32044
1.27327	06_MeOH-MeNH2_2.00_dimer.out	0.00454664	0.0098488	0.00265108	0.00997698	0.0310629	0.010543	0.025692	0.0148886	0.00540172	0.0194437	0.0231438	0.00185004	0.009317	0.00654456	0.00793078	0.0335495	0.0068014	0.0133741	0.0144687	0.0118468	0.0131577	0.0129024	0.00737973	0.0104573	0.01246	0.0101913	0.0117712	0.0157202	0.0155903	0.0159443	0.0226069	0.024319	0.0237048		1.27781	1.26342	1.27062	1.28324	1.2422	1.26272	1.29896	1.25838	1.27867	1.29271	1.25012	1.27142
7.75614	07_MeOH-Peptide_0.90_dimer.out	0.106531	0.398703	0.252617	0.239862	1.00643	0.623148	0.0465587	0.803099	0.424829	0.0346548	0.721145	0.343245	0.145851	0.133567	0.139709	0.0500927	0.701431	0.325669	0.209219	0.200224	0.204722	0.171989	0.139364	0.15769	0.19264	0.186876	0.193409	0.0626236	0.0437654	0.0495558	0.10344	0.0764062	0.0860654		7.64961	7.35744	7.50352	7.51628	6.74971	7.13299	7.70958	6.95304	7.33131	7.7908	7.035	7.4129
8.23517	07_MeOH-Peptide_0.95_dimer.out	0.0944781	0.346992	0.220735	0.215801	0.880504	0.548153	0.0436397	0.697896	0.370768	0.0327277	0.618375	0.292823	0.127809	0.116927	0.122368	0.0424409	0.606592	0.282076	0.184247	0.176789	0.180518	0.156923	0.123481	0.142542	0.166841	0.162663	0.168594	0.049548	0.0297905	0.0362363	0.0847795	0.056646	0.0671545		8.14069	7.88818	8.01444	8.01937	7.35467	7.68702	8.19153	7.53728	7.8644	8.2679	7.6168	7.94235
8.28898	07_MeOH-Peptide_1.00_dimer.out	0.0823454	0.302069	0.192207	0.187548	0.762354	0.474951	0.0340231	0.599209	0.316616	0.0418664	0.521259	0.239696	0.114027	0.107254	0.11064	0.0427391	0.517637	0.237449	0.164355	0.160735	0.162545	0.140751	0.113174	0.129015	0.148489	0.14801	0.15174	0.0362554	0.0218388	0.0256406	0.0655102	0.042966	0.0506718		8.20663	7.98691	8.09677	8.10143	7.52662	7.81403	8.25495	7.68977	7.97236	8.33084	7.76772	8.04928
8.07188	07_MeOH-Peptide_1.05_dimer.out	0.0679807	0.261417	0.164699	0.16846	0.665269	0.416864	0.0230782	0.51568	0.269379	0.0453034	0.440543	0.19762	0.0974203	0.0947135	0.0960669	0.0496126	0.440886	0.195637	0.145079	0.143751	0.144415	0.123543	0.100285	0.113704	0.129685	0.131858	0.13412	0.0273427	0.0123815	0.0167699	0.0560129	0.0302326	0.0400475		8.0039	7.81047	7.90719	7.90342	7.40662	7.65502	8.04881	7.5562	7.80251	8.11719	7.63134	7.87426
7.69153	07_MeOH-Peptide_1.10_dimer.out	0.0613406	0.23429	0.147815	0.143561	0.576007	0.359784	0.0161234	0.443156	0.22964	0.0541215	0.370069	0.157974	0.0909866	0.0973499	0.0941683	0.0475955	0.37673	0.164567	0.132763	0.140901	0.136832	0.113782	0.102244	0.109608	0.119315	0.130423	0.127802	0.0189995	0.0172646	0.0149746	0.04127	0.03048	0.0326004		7.63018	7.45724	7.54371	7.54796	7.11552	7.33174	7.6754	7.24837	7.46189	7.74565	7.32146	7.53355
6.18753	07_MeOH-Peptide_1.25_dimer.out	0.0378272	0.15549	0.0966587	0.0602658	0.354886	0.207576	0.00867955	0.279766	0.135543	0.0556858	0.232013	0.0881636	0.0683187	0.0740106	0.0711647	0.0431522	0.242206	0.0995269	0.0909202	0.0986362	0.0947782	0.0857951	0.0775809	0.0827284	0.0813175	0.0914375	0.0884483	0.0201466	0.0216847	0.0188081	0.0296953	0.0264898	0.0258686		6.1497	6.03204	6.09087	6.12727	5.83265	5.97996	6.19621	5.90777	6.05199	6.24322	5.95552	6.09937
3.64659	07_MeOH-Peptide_1.50_dimer.out	0.00695692	0.0724184	0.0396877	0.00748341	0.154464	0.0809735	0.0222077	0.120841	0.0493167	0.0329829	0.111428	0.0392227	0.0260783	0.0406709	0.0333746	0.0370533	0.10403	0.0334882	0.0358115	0.051693	0.0437522	0.0416254	0.0441267	0.0440817	0.028047	0.0455223	0.038488	0.0150359	0.0303567	0.0222203	0.0217771	0.0374719	0.0290715		3.63964	3.57418	3.60691	3.63911	3.49213	3.56562	3.6688	3.52575	3.59728	3.67958	3.53517	3.60737
1.09751	07_MeOH-Peptide_2.00_dimer.out	0.00184693	0.0190327	0.0104398	0.0046675	0.0357417	0.0202046	0.00515667	0.0243757	0.0096095	0.00758477	0.0232498	0.00783252	0.00643873	0.0155296	0.0109842	0.0100688	0.0186926	0.00431194	0.00965926	0.0192556	0.0144574	0.00894836	0.0160437	0.0126469	0.00828219	0.0182079	0.0135433	0.0039504	0.014296	0.00902056	0.00649669	0.0175547	0.011873		1.09566	1.07848	1.08707	1.09284	1.06177	1.0773	1.10267	1.07313	1.0879	1.10509	1.07426	1.08968
4.67513	08_MeOH-Water_0.90_dimer.out	0.0224294	0.221904	0.122167	0.0622359	0.570969	0.316603	0.00671037	0.486496	0.239893	0.0475015	0.446979	0.199739	0.0415345	0.0484289	0.0449817	0.0411835	0.44426	0.201538	0.0641362	0.0761205	0.0701284	0.0553742	0.0518557	0.0550391	0.056179	0.0689585	0.0643836	0.000268316	0.00512731	0.00060955	0.0110065	0.0164167	0.0117275		4.6527	4.45323	4.55297	4.6129	4.10416	4.35853	4.68184	4.18864	4.43524	4.72263	4.22815	4.47539
5.01703	08_MeOH-Water_0.95_dimer.out	0.0207518	0.190336	0.105544	0.0387531	0.475364	0.257059	0.0114061	0.411613	0.200103	0.0580338	0.366745	0.154356	0.0418356	0.0452602	0.0435479	0.0364857	0.379737	0.171626	0.0582786	0.0661591	0.0622188	0.0536871	0.0482183	0.0521958	0.0516829	0.0601637	0.0574325	0.0059486	0.00390377	0.00700513	0.00245323	0.00162774	0.00431701		4.99628	4.82669	4.91148	4.97828	4.54166	4.75997	5.02843	4.60542	4.81693	5.07506	4.65028	4.86267
5.04458	08_MeOH-Water_1.00_dimer.out	0.0169598	0.161022	0.0889908	0.0348064	0.409827	0.222316	0.021139	0.341444	0.160153	0.0610637	0.304061	0.121499	0.0419387	0.0427305	0.0423346	0.0491117	0.307253	0.129071	0.0602785	0.0651474	0.062713	0.0518497	0.0452262	0.0495995	0.0544185	0.0597915	0.0584483	0.00102377	0.00176742	0.000379686	0.00827727	0.00866786	0.00649413		5.02762	4.88356	4.95559	5.00978	4.63476	4.82227	5.06572	4.70314	4.88443	5.10565	4.74052	4.92308
4.88113	08_MeOH-Water_1.05_dimer.out	0.0132553	0.135275	0.0742654	0.015083	0.337683	0.176383	0.0332352	0.278676	0.12272	0.0697871	0.243812	0.0870124	0.0437361	0.0412573	0.0424967	0.0573943	0.249172	0.095889	0.0595756	0.0606007	0.0600882	0.0524114	0.0434492	0.0488669	0.0544622	0.0559182	0.0563631	0.00627767	0.00305487	0.003038	0.0119674	0.00792763	0.00815425		4.86788	4.74586	4.80687	4.86605	4.54345	4.70475	4.91437	4.60246	4.75841	4.95092	4.63732	4.79412
4.60958	08_MeOH-Water_1.10_dimer.out	0.00854639	0.113079	0.0608127	0.000261196	0.278474	0.139106	0.0424743	0.227527	0.0925264	0.073268	0.19816	0.0624458	0.0419973	0.038043	0.0400201	0.0635808	0.202054	0.0692364	0.0558354	0.0547442	0.0552898	0.0493829	0.0399271	0.0454704	0.0514557	0.0507147	0.0520913	0.0104398	0.00586326	0.00677981	0.0157271	0.0103751	0.0115402		4.60103	4.4965	4.54876	4.60984	4.3311	4.47047	4.65205	4.38205	4.51705	4.68285	4.41142	4.54713
3.59767	08_MeOH-Water_1.25_dimer.out	0.00345985	0.0717285	0.0375942	0.0324932	0.149791	0.0586487	0.0504845	0.125546	0.0375307	0.0681638	0.109204	0.0205202	0.0388276	0.0364438	0.0376357	0.0594802	0.113424	0.0269717	0.0447255	0.0443916	0.0445586	0.050108	0.0392604	0.0458684	0.0391792	0.0394269	0.0405658	0.0207098	0.0185371	0.0188383	0.0216985	0.019702	0.0198182		3.59421	3.52594	3.56007	3.63016	3.44788	3.53902	3.64815	3.47212	3.56014	3.66583	3.48846	3.57715
2.20477	08_MeOH-Water_1.50_dimer.out	0.010522	0.0248066	0.00714232	0.0476645	0.0533955	0.00286548	0.053882	0.0448179	0.00453208	0.054373	0.0444589	0.00495705	0.0179064	0.0116865	0.0147965	0.0569908	0.0405291	0.00823086	0.0199446	0.0144984	0.0172215	0.0230189	0.0129678	0.0185347	0.0174785	0.01229	0.0154458	0.0174032	0.0112932	0.0143268	0.0193051	0.0139561	0.0166034		2.21529	2.17996	2.19762	2.25243	2.15137	2.2019	2.25865	2.15995	2.2093	2.25914	2.16031	2.20972
0.909327	08_MeOH-Water_2.00_dimer.out	0.00203123	0.0114151	0.00469191	0.0287408	0.0157801	0.00648032	0.0327512	0.0110642	0.0108435	0.0333229	0.0103207	0.0115011	0.0181098	0.0116451	0.0148775	0.0347564	0.00870617	0.0130251	0.0194245	0.0131911	0.0163078	0.0189669	0.0119088	0.0155776	0.0189381	0.0126764	0.0159245	0.017524	0.0108304	0.0141508	0.0186799	0.0120678	0.0153514		0.911358	0.897912	0.904635	0.938067	0.893546	0.915807	0.942078	0.898262	0.92017	0.94265	0.899006	0.920828
2.83742	09_MeNH2-MeOH_0.90_dimer.out	0.0220378	0.183185	0.102611	0.0443056	0.497364	0.270835	0.0424121	0.401842	0.179715	0.099341	0.344769	0.122714	0.0642934	0.0398252	0.0520593	0.0857709	0.354081	0.134155	0.0927209	0.0711391	0.08193	0.0711314	0.0412863	0.0566802	0.0874946	0.0668716	0.0783391	0.00595249	0.0227126	0.0109289	0.0185719	0.0150875	0.000972611		2.81538	2.65423	2.73481	2.79311	2.34005	2.56658	2.87983	2.43558	2.6577	2.93676	2.49265	2.7147
3.05113	09_MeNH2-MeOH_0.95_dimer.out	0.0179426	0.155597	0.0867697	0.0221337	0.406096	0.214115	0.0511069	0.323256	0.136074	0.102019	0.273161	0.085571	0.0632139	0.0456739	0.0544439	0.0877272	0.281836	0.0970542	0.0872234	0.0728304	0.0800269	0.0696371	0.0470199	0.0587448	0.0825162	0.0690043	0.0767999	0.0110395	0.00921846	0.00136458	0.0209117	0.00285475	0.00657398		3.03318	2.89553	2.96436	3.02899	2.64503	2.83701	3.10223	2.72787	2.91505	3.15314	2.77796	2.96555
3.03663	09_MeNH2-MeOH_1.00_dimer.out	0.0105075	0.131555	0.0710313	0.00705543	0.330263	0.168659	0.0545917	0.260604	0.103006	0.0989231	0.21652	0.0587984	0.0531887	0.0469464	0.0500675	0.0854152	0.225774	0.0701794	0.0733977	0.069782	0.0715898	0.0598965	0.0484003	0.0546313	0.0688468	0.0660536	0.0684578	0.00775775	0.00135924	0.00121608	0.0156567	0.00317866	0.00729348		3.02612	2.90507	2.9656	3.02957	2.70636	2.86797	3.09122	2.77602	2.93362	3.13555	2.82011	2.97783
2.89242	09_MeNH2-MeOH_1.05_dimer.out	0.00795649	0.110874	0.0594151	0.00436752	0.267164	0.131398	0.051899	0.210523	0.0793118	0.0932578	0.170891	0.0388164	0.0471998	0.0455405	0.0463702	0.0756648	0.182202	0.0532687	0.0627815	0.0641085	0.063445	0.0529359	0.0468187	0.0503253	0.0590174	0.0609245	0.0608126	0.00481529	0.00211321	0.00162099	0.00891234	0.00423132	0.00454789		2.88446	2.78155	2.83301	2.89679	2.62526	2.76102	2.94432	2.6819	2.81311	2.98568	2.72153	2.8536
2.6818	09_MeNH2-MeOH_1.10_dimer.out	0.00378734	0.0895389	0.0466631	0.0125221	0.212168	0.0998229	0.0482896	0.169881	0.0607956	0.0821084	0.137311	0.0276011	0.0379308	0.036864	0.0373974	0.0661734	0.148737	0.041282	0.049656	0.0507264	0.0501912	0.0445954	0.0384126	0.042088	0.045761	0.0474061	0.0474566	0.00327329	0.00117483	0.000716087	0.00560763	0.00151852	0.00191272		2.67801	2.59226	2.63513	2.69432	2.46963	2.58197	2.73008	2.51191	2.621	2.7639	2.54448	2.65419
1.97082	09_MeNH2-MeOH_1.25_dimer.out	0.0195054	0.0386436	0.00956911	0.0346782	0.092049	0.0286854	0.0491534	0.0744286	0.0126376	0.0499703	0.0775587	0.0137942	6.71027e-05	0.0151817	0.00755731	0.056391	0.0656183	0.00461368	0.00467812	0.020958	0.0128181	0.00921083	0.0173655	0.0141293	0.00012432	0.0171326	0.00964451	0.000904266	0.0186116	0.00883543	0.00361412	0.0256871	0.0145003		1.99033	1.93218	1.96125	2.0055	1.87877	1.94214	2.01998	1.8964	1.95819	2.02079	1.89327	1.95703
1.09813	09_MeNH2-MeOH_1.50_dimer.out	0.0179327	0.0122544	0.00283918	0.0234445	0.0394518	0.00800364	0.0340641	0.0269138	0.00357515	0.0270207	0.0391378	0.00605854	0.00735644	0.00264312	0.00235666	0.0393739	0.0206448	0.00936454	0.00387516	0.0067533	0.00143907	0.00155522	0.00403148	0.00178695	0.00676109	0.00429406	0.000586726	0.00013837	0.0160377	0.00828897	0.00529873	0.0252216	0.0154504		1.11606	1.08587	1.10097	1.12157	1.05867	1.09012	1.13219	1.07121	1.1017	1.12515	1.05899	1.09207
0.393125	09_MeNH2-MeOH_2.00_dimer.out	0.00946145	0.00466485	0.0023983	0.00959716	0.0117588	0.0010808	0.0164488	0.00470074	0.00587405	0.0121536	0.00923533	0.00145916	0.00488027	0.00464131	0.00011948	0.0198747	0.00117173	0.00935147	0.00263417	0.00695505	0.00216044	0.00489746	0.00463333	0.000137568	0.00279488	0.00682375	0.00204999	0.000478549	0.00961014	0.00475916	0.00296025	0.013806	0.00858152		0.402587	0.388461	0.395524	0.402723	0.381367	0.392045	0.409574	0.388425	0.399	0.405279	0.38389	0.394585
3.72176	10_MeNH2-MeNH2_0.90_dimer.out	0.0558163	0.225318	0.140567	0.153745	0.63176	0.392753	0.0303628	0.503233	0.266798	0.0214087	0.448758	0.213675	0.0725045	0.0431074	0.057806	0.0313286	0.43897	0.203821	0.112951	0.0852408	0.0990961	0.0741388	0.0433621	0.0587684	0.109178	0.0822148	0.0965265	0.019449	0.0165849	0.000897851	0.04552	0.00293754	0.0218325		3.66594	3.49644	3.58119	3.56801	3.09	3.329	3.69139	3.21852	3.45496	3.74316	3.273	3.50808
4.10425	10_MeNH2-MeNH2_0.95_dimer.out	0.0467593	0.189363	0.118061	0.130541	0.528931	0.329736	0.0229495	0.417996	0.220473	0.025976	0.368184	0.171104	0.0623698	0.0394635	0.0509166	0.0308464	0.362529	0.165841	0.0976403	0.0758296	0.0867349	0.0640141	0.0397639	0.0519513	0.0942506	0.0730899	0.0844176	0.0122308	0.015119	0.00363817	0.0339156	0.000571746	0.0149321		4.05749	3.91489	3.98619	3.97371	3.57532	3.77451	4.0813	3.68625	3.88378	4.13023	3.73607	3.93315
4.1526	10_MeNH2-MeNH2_1.00_dimer.out	0.0392671	0.158706	0.0989864	0.113676	0.446278	0.279977	0.0162157	0.344653	0.180434	0.0340077	0.295591	0.130792	0.0543805	0.0367923	0.0455864	0.0325144	0.29384	0.130663	0.0863296	0.0701068	0.0782182	0.0565397	0.037208	0.046977	0.082956	0.0673739	0.0759093	0.00291145	0.0169674	0.00927063	0.0209144	0.00401652	0.00601758		4.11334	3.9939	4.05362	4.03893	3.70633	3.87263	4.13639	3.80795	3.97217	4.18661	3.85701	4.02181
4.00192	10_MeNH2-MeNH2_1.05_dimer.out	0.0345583	0.135909	0.0852334	0.0952928	0.374598	0.234945	0.0104475	0.283509	0.146978	0.0332482	0.242015	0.104383	0.0503662	0.0391368	0.0447515	0.0319751	0.237964	0.102995	0.07818	0.0689974	0.0735887	0.0511375	0.0392976	0.0452668	0.0757446	0.066884	0.0718632	0.00558675	0.00633064	0.0023176	0.021267	0.00630735	0.0116382		3.96736	3.86601	3.91668	3.90662	3.62732	3.76697	3.99147	3.71841	3.85494	4.03516	3.7599	3.89753
3.74167	10_MeNH2-MeNH2_1.10_dimer.out	0.0254587	0.111004	0.0682313	0.073976	0.309884	0.19193	0.00513574	0.234482	0.119809	0.033622	0.199012	0.0826952	0.0387832	0.030047	0.0344151	0.0292844	0.196781	0.0837485	0.0613502	0.054765	0.0580576	0.0401716	0.030412	0.0354559	0.0590292	0.0526476	0.0563701	0.000935857	0.00881943	0.00659723	0.0108688	0.00117631	0.0040788		3.71621	3.63067	3.67344	3.6677	3.43179	3.54974	3.73654	3.50719	3.62186	3.77529	3.54266	3.65898
2.78069	10_MeNH2-MeNH2_1.25_dimer.out	0.00744104	0.0626111	0.0350261	0.0187321	0.167723	0.0932276	0.0164505	0.127611	0.0555801	0.0317248	0.118054	0.0431646	0.0231052	0.0199951	0.0215501	0.0340419	0.107555	0.0367564	0.0346386	0.0331446	0.0338916	0.0302471	0.0216392	0.0265536	0.0305421	0.029717	0.0310425	0.00745209	0.00952312	0.00783045	0.0147442	0.018706	0.0158343		2.77324	2.71807	2.74566	2.76195	2.61296	2.68746	2.79714	2.65308	2.72511	2.81241	2.66263	2.73752
1.30176	10_MeNH2-MeNH2_1.50_dimer.out	0.0155886	0.00413042	0.00572909	0.0226445	0.0408667	0.00911111	0.0330159	0.0277938	0.00261105	0.0221187	0.0429003	0.0103908	0.00416268	0.0113841	0.00777338	0.0382016	0.0212573	0.00847213	0.000762753	0.00709856	0.00393066	0.00233849	0.00989513	0.00323028	0.00395927	0.00972837	0.00613519	0.00700475	0.00516902	0.00659419	0.0134306	0.0157247	0.0149794		1.31734	1.29763	1.30748	1.3244	1.26089	1.29264	1.33477	1.27396	1.30437	1.32387	1.25886	1.29136
0.385362	10_MeNH2-MeNH2_2.00_dimer.out	0.00453721	0.000233134	0.00238517	0.00684068	0.00819222	0.00067577	0.012759	0.00193795	0.00541053	0.0101504	0.00599402	0.00207817	0.385362	0.385362	0.385362	0.0157182	0.00118919	0.00845368	0.00279341	0.000393689	0.00159355	0.428636	0.395218	0.41552	0.0169317	0.0153768	0.0118193	0.388035	0.389807	0.389045	0.00619114	0.0065217	0.00644018		0.389899	0.385595	0.387747	0.392203	0.37717	0.384686	0.398121	0.383424	0.390773	0.395512	0.379368	0.38744
4.95826	11_MeNH2-Peptide_0.90_dimer.out	0.0626	0.312184	0.187392	0.161894	0.831251	0.496572	0.033729	0.637527	0.301899	0.109243	0.559004	0.224881	0.125757	0.0988782	0.112317	0.131541	0.540665	0.204562	0.189885	0.162384	0.176135	0.126103	0.0983729	0.111682	0.184918	0.159234	0.1731	0.0483698	0.0128357	0.0272087	0.0915296	0.0437495	0.064118		4.89566	4.64608	4.77087	4.79637	4.12701	4.46169	4.99199	4.32073	4.65636	5.0675	4.39926	4.73338
5.35424	11_MeNH2-Peptide_0.95_dimer.out	0.03962	0.254778	0.147199	0.113253	0.689983	0.401618	0.0581831	0.51874	0.230279	0.117008	0.457499	0.170245	0.103743	0.0817145	0.0927288	0.143901	0.433119	0.144609	0.159943	0.137851	0.148897	0.106229	0.0817843	0.0937161	0.154602	0.134247	0.145543	0.043459	0.0146087	0.0263895	0.0833241	0.0453258	0.0615837		5.31462	5.09946	5.20704	5.24098	4.66425	4.95262	5.41242	4.8355	5.12396	5.47124	4.89674	5.18399
5.39666	11_MeNH2-Peptide_1.00_dimer.out	0.03424	0.21422	0.12423	0.0798423	0.578294	0.329068	0.0682539	0.430578	0.181162	0.115772	0.381772	0.133	0.101439	0.0723686	0.0869036	0.142302	0.356719	0.107209	0.149987	0.120793	0.13539	0.107101	0.0731321	0.0900598	0.143783	0.116568	0.131478	0.0527421	0.018889	0.0336826	0.0880956	0.0470554	0.0653425		5.36242	5.18244	5.27243	5.31682	4.81837	5.06759	5.46492	4.96609	5.2155	5.51243	5.01489	5.26366
5.22226	11_MeNH2-Peptide_1.05_dimer.out	0.0282111	0.190436	0.109324	0.0580555	0.488345	0.2732	0.0683913	0.359743	0.145676	0.116577	0.314678	0.0990505	0.0915469	0.0794323	0.0854896	0.131615	0.295442	0.0819139	0.132998	0.12159	0.127294	0.098806	0.0806792	0.0899384	0.126605	0.116988	0.123159	0.0421656	0.0300518	0.0339663	0.0702366	0.0535049	0.0594814		5.19405	5.03183	5.11294	5.16421	4.73392	4.94906	5.29066	4.86252	5.07659	5.33884	4.90759	5.12321
4.92339	11_MeNH2-Peptide_1.10_dimer.out	0.0155356	0.157744	0.0866398	0.0308086	0.405496	0.218152	0.0751672	0.294845	0.109839	0.11122	0.263641	0.0762103	0.0750035	0.067856	0.0714298	0.128155	0.23952	0.0556822	0.109744	0.104129	0.106937	0.0868613	0.0702119	0.0791759	0.101773	0.098133	0.101674	0.0380567	0.0336635	0.0342688	0.0627862	0.0569849	0.058027		4.90785	4.76564	4.83675	4.89258	4.51789	4.70524	4.99856	4.62854	4.81355	5.03461	4.65975	4.84718
3.19683	11_MeNH2-Peptide_1.25_dimer.out	0.000176957	0.0722043	0.0361906	0.00309428	0.199986	0.0984458	0.0624986	0.136407	0.0369542	0.0681489	0.12851	0.0301806	0.0412692	0.0301108	0.03569	0.0922007	0.104618	0.00620847	0.060743	0.050953	0.055848	0.0521441	0.0322558	0.0427707	0.0543618	0.0462516	0.051676	0.0354787	0.0214576	0.0282048	0.0533835	0.0390221	0.0459963		3.19665	3.12463	3.16064	3.19992	2.99684	3.09838	3.25933	3.06042	3.15988	3.26498	3.06832	3.16665
1.39662	11_MeNH2-Peptide_1.50_dimer.out	0.0176985	0.0110363	0.0033311	0.0325801	0.0472909	0.0073554	0.0512688	0.0280981	0.0115853	0.0266359	0.0525062	0.0129351	0.00431127	0.000149948	0.00208066	0.0606131	0.0185017	0.0210557	0.0104377	0.00614177	0.00828976	0.0115966	0.00130738	0.00685469	0.00668188	0.00343733	0.00586038	0.029555	0.0265954	0.0291768	0.0425216	0.0430181	0.0439526		1.41432	1.38558	1.39995	1.4292	1.34933	1.38926	1.44789	1.36852	1.4082	1.42325	1.34411	1.38368
0.454835	11_MeNH2-Peptide_2.00_dimer.out	0.00908951	0.00155274	0.00376838	0.0174564	0.00616768	0.00564438	0.0215575	0.00223796	0.0096598	0.0116807	0.00942152	0.00112957	0.00091503	0.00110349	9.42304e-05	0.0236081	0.000273096	0.0116675	0.000429384	0.00239172	0.00141055	0.000871857	0.00139745	0.00116986	0.000479949	0.00184502	0.000867489	0.00920683	0.00897496	0.0095205	0.0132939	0.0132448	0.013817		0.463925	0.453282	0.458604	0.472292	0.448667	0.46048	0.476393	0.452597	0.464495	0.466516	0.445414	0.455965
6.86088	12_MeNH2-Water_0.90_dimer.out	0.0391511	0.26589	0.15252	0.126884	0.753478	0.440181	0.0156535	0.630318	0.322986	0.0280549	0.583609	0.277777	0.0545569	0.026958	0.0407574	0.0399615	0.568738	0.264388	0.09102	0.067332	0.079176	0.062021	0.0289066	0.0463323	0.0849077	0.061727	0.07472	0.00976441	0.024224	0.00920015	0.0340905	0.00323722	0.0134238		6.82173	6.59499	6.70836	6.73399	6.1074	6.4207	6.84522	6.23056	6.53789	6.88893	6.27727	6.5831
7.29079	12_MeNH2-Water_0.95_dimer.out	0.0358837	0.228492	0.132188	0.115096	0.650446	0.382771	0.00506646	0.531367	0.268217	0.0358845	0.488981	0.226548	0.0560886	0.0299173	0.0430029	0.0499481	0.471828	0.21094	0.092158	0.0689534	0.0805557	0.0630666	0.0317231	0.048191	0.0862952	0.0636582	0.0763154	0.0141219	0.0165278	0.0030426	0.03882	0.00491535	0.0199524		7.25491	7.0623	7.1586	7.1757	6.64035	6.90802	7.28573	6.75943	7.02258	7.32668	6.80181	7.06424
7.3118	12_MeNH2-Water_1.00_dimer.out	0.0321826	0.195722	0.113952	0.0943092	0.550502	0.322405	0.00444104	0.453757	0.229099	0.0365349	0.413804	0.188634	0.0503708	0.0265446	0.0384577	0.040493	0.405385	0.182446	0.0798312	0.0582591	0.0690451	0.0584545	0.0285611	0.0443545	0.0739638	0.0530853	0.0648539	0.00837867	0.0172351	0.0062576	0.0264607	0.0021039	0.0101926		7.27961	7.11607	7.19784	7.21749	6.76129	6.98939	7.30735	6.85804	7.0827	7.34833	6.89799	7.12316
7.07662	12_MeNH2-Water_1.05_dimer.out	0.0283502	0.167725	0.0980374	0.0762923	0.46594	0.271116	0.00162884	0.382875	0.192252	0.0350339	0.34781	0.156388	0.0458696	0.0266646	0.0362671	0.0357029	0.341342	0.15282	0.0703456	0.0538948	0.0621202	0.0533963	0.0285241	0.0417305	0.0651041	0.0492492	0.0583662	0.00829756	0.0117586	0.00336419	0.0225929	0.000917239	0.00995907		7.04827	6.90889	6.97858	7.00032	6.61067	6.8055	7.07499	6.69374	6.88436	7.11165	6.72881	6.92023
6.69088	12_MeNH2-Water_1.10_dimer.out	0.0257664	0.148115	0.0869405	0.0634726	0.395214	0.229343	0.00396886	0.31756	0.156795	0.037281	0.28742	0.12507	0.0452619	0.0370204	0.0411411	0.0376896	0.278733	0.120522	0.0673703	0.0624768	0.0649236	0.0519713	0.0386481	0.0459664	0.0626762	0.0583095	0.0615587	0.0111236	0.00399471	0.00608277	0.0239818	0.0169413	0.0187811		6.66512	6.54277	6.60394	6.62741	6.29567	6.46154	6.69485	6.37332	6.53409	6.72816	6.40346	6.56581
5.23057	12_MeNH2-Water_1.25_dimer.out	0.0129587	0.0979113	0.055435	0.036063	0.242878	0.13947	0.00694995	0.196476	0.0947629	0.0356939	0.169005	0.0666555	0.0260115	0.033289	0.0296502	0.0284564	0.173275	0.0724093	0.0401118	0.0485003	0.0443061	0.0309189	0.0343174	0.0329362	0.0368338	0.0459216	0.0420946	0.00344544	0.00318759	0.00140963	0.00267325	0.00699674	0.00342631		5.21761	5.13266	5.17513	5.19451	4.98769	5.0911	5.23752	5.03409	5.13581	5.26626	5.06156	5.16391
3.15494	12_MeNH2-Water_1.50_dimer.out	0.00659418	0.0476021	0.0270981	0.00665975	0.0983155	0.0458279	0.0233224	0.0802453	0.0284615	0.0269282	0.07775	0.0254109	0.0262085	0.0262	0.0262043	0.0316537	0.0712102	0.0197783	0.0316708	0.0321238	0.0318973	0.0336569	0.0279891	0.0315342	0.027891	0.0289157	0.0292494	0.0225132	0.0234658	0.0228332	0.0269742	0.0283538	0.0274605		3.14834	3.10733	3.12784	3.1616	3.05662	3.10911	3.17826	3.07469	3.12648	3.18186	3.07719	3.12953
1.19627	12_MeNH2-Water_2.00_dimer.out	0.00103952	0.00767831	0.0033194	0.0103882	0.0206534	0.00513262	0.0188647	0.0125711	0.0031468	0.0133637	0.0184306	0.00253345	0.0106473	0.00447041	0.00755886	0.023103	0.00853001	0.00728651	0.0134261	0.00711991	0.010273	0.013322	0.00508528	0.00943141	0.0120075	0.00597917	0.00930563	0.0162848	0.010891	0.0138358	0.0205911	0.0159725	0.0185344		1.19731	1.18859	1.19295	1.20666	1.17562	1.19114	1.21513	1.1837	1.19942	1.20963	1.17784	1.19374
5.75338	13_Peptide-MeOH_0.90_dimer.out	0.007007	0.276242	0.141625	0.0618548	0.770223	0.416039	0.116789	0.578659	0.230935	0.162114	0.535429	0.186658	0.088172	0.0779678	0.0830699	0.206111	0.482876	0.138383	0.146734	0.140766	0.14375	0.109572	0.0820281	0.0967621	0.132659	0.130414	0.134556	0.0417231	0.0305984	0.0341417	0.0876998	0.0754535	0.0793529		5.74638	5.47714	5.61176	5.69153	4.98316	5.33734	5.87017	5.17472	5.52245	5.9155	5.21795	5.56673
6.16512	13_Peptide-MeOH_0.95_dimer.out	0.00137863	0.236876	0.117749	0.042484	0.654225	0.348355	0.111629	0.489317	0.188844	0.153612	0.44742	0.146904	0.0709054	0.0713667	0.071136	0.188686	0.406863	0.109088	0.121426	0.125426	0.123426	0.0906487	0.0750363	0.0836538	0.108704	0.116238	0.115186	0.0278813	0.0254578	0.0247907	0.0667444	0.0621277	0.0624285		6.1665	5.92825	6.04738	6.12264	5.5109	5.81677	6.27675	5.67581	5.97628	6.31874	5.7177	6.01822
6.22026	13_Peptide-MeOH_1.00_dimer.out	0.0113873	0.19744	0.0930261	0.022154	0.546538	0.284346	0.109362	0.408635	0.149637	0.146863	0.370828	0.111982	0.0528485	0.0589723	0.0559104	0.17512	0.339684	0.0822818	0.0959618	0.104179	0.10007	0.0718182	0.0625437	0.068006	0.0841448	0.0956979	0.0924385	0.0144178	0.017544	0.0143009	0.0471179	0.0470583	0.0453058		6.23165	6.02282	6.12723	6.19811	5.67372	5.93591	6.32962	5.81162	6.07062	6.36712	5.84943	6.10828
6.05408	13_Peptide-MeOH_1.05_dimer.out	0.00816502	0.171569	0.0817021	0.0196606	0.467973	0.243817	0.0991684	0.343399	0.122115	0.141415	0.303595	0.0810896	0.0514999	0.0589118	0.0552059	0.158583	0.281111	0.0612642	0.0904541	0.0997496	0.0951018	0.0699331	0.0624366	0.067041	0.0791919	0.0916142	0.0878064	0.00820517	0.0152962	0.00987098	0.0354281	0.0396127	0.0354338		6.06224	5.88251	5.97237	6.03442	5.5861	5.81026	6.15324	5.71068	5.93196	6.19549	5.75048	5.97299
5.75857	13_Peptide-MeOH_1.10_dimer.out	0.00692523	0.149398	0.0712362	0.00601889	0.389988	0.198003	0.0862186	0.293017	0.103399	0.131033	0.254423	0.0616951	0.0450622	0.0552356	0.0501489	0.132337	0.244532	0.0560973	0.0752993	0.0870243	0.0811618	0.0632807	0.0588118	0.0619851	0.0647881	0.0793703	0.0743273	0.000863313	0.0129454	0.00406398	0.0169297	0.0287149	0.0205066		5.7655	5.60918	5.68734	5.75255	5.36859	5.56057	5.84479	5.46556	5.65517	5.88961	5.50415	5.69688
4.60846	13_Peptide-MeOH_1.25_dimer.out	0.0208303	0.0866631	0.0329164	0.0276452	0.219646	0.0960005	0.0806878	0.164985	0.0421487	0.0925381	0.157859	0.0326605	0.0184144	0.0353125	0.0268634	0.107209	0.137655	0.0152228	0.0358026	0.0532313	0.044517	0.0348681	0.0385145	0.0375113	0.0270537	0.0470344	0.0389009	0.00627017	0.0275041	0.0163786	0.0203678	0.0424652	0.0307173		4.62929	4.5218	4.57554	4.6361	4.38881	4.51246	4.68915	4.44347	4.56631	4.701	4.4506	4.5758
2.94801	13_Peptide-MeOH_1.50_dimer.out	0.0200786	0.0396825	0.00980199	0.0161544	0.113313	0.0485793	0.0546703	0.0722568	0.00879328	0.0445152	0.0865921	0.0210384	0.00260097	0.0183257	0.0104633	0.0739282	0.0517288	0.0110997	0.0152271	0.0317846	0.0235059	0.0152798	0.0209635	0.0189242	0.00854342	0.0267607	0.0190945	0.0130079	0.0340337	0.0239948	0.028454	0.0534427	0.0413154		2.96809	2.90832	2.9382	2.96416	2.83469	2.89943	3.00268	2.87575	2.93921	2.99252	2.86141	2.92697
1.30709	13_Peptide-MeOH_2.00_dimer.out	0.0113718	0.011876	0.000252088	0.0112914	0.0360455	0.012377	0.026325	0.0219646	0.0021802	0.0138091	0.0340767	0.0101338	0.00156803	0.00526158	0.00184678	0.0338418	0.0149242	0.0094588	0.00336023	0.00987754	0.00661888	0.00217726	0.00592453	0.00417155	0.00129598	0.00853815	0.00534504	0.0112583	0.0185336	0.0154543	0.019662	0.0281768	0.0245286		1.31846	1.29522	1.30684	1.31838	1.27105	1.29472	1.33342	1.28513	1.30927	1.3209	1.27302	1.29696
6.90681	14_Peptide-MeNH2_0.90_dimer.out	0.060671	0.3201	0.190386	0.0865282	0.851859	0.469194	0.0952124	0.658095	0.281441	0.155443	0.597905	0.221231	0.162874	0.0984995	0.130687	0.186083	0.561213	0.187565	0.222451	0.162019	0.192235	0.178932	0.101473	0.140851	0.210717	0.153347	0.184552	0.10115	0.0325464	0.0641522	0.144002	0.0710832	0.104665		6.84613	6.5867	6.71642	6.82028	6.05495	6.43761	7.00202	6.24871	6.62536	7.06225	6.3089	6.68557
7.41129	14_Peptide-MeNH2_0.95_dimer.out	0.0368369	0.261635	0.149236	0.058522	0.713403	0.385963	0.103521	0.542997	0.219738	0.147327	0.500448	0.17656	0.12886	0.0771646	0.103012	0.184542	0.457794	0.136626	0.18198	0.133027	0.157504	0.148337	0.0810025	0.115688	0.169183	0.12346	0.149079	0.0839667	0.0305408	0.0552987	0.124923	0.0687423	0.0947048		7.37445	7.14965	7.26205	7.35276	6.69788	7.02532	7.51481	6.86829	7.19155	7.55861	6.91084	7.23473
7.50022	14_Peptide-MeNH2_1.00_dimer.out	0.0301285	0.224026	0.127077	0.0525983	0.612213	0.332405	0.0934842	0.460276	0.183396	0.135413	0.419363	0.141975	0.111173	0.0691316	0.0901524	0.166525	0.384308	0.108891	0.159062	0.118939	0.139	0.12906	0.0726071	0.101719	0.147377	0.110324	0.131358	0.068204	0.0242998	0.0443798	0.104449	0.0571253	0.0787562		7.47009	7.27619	7.37314	7.44762	6.888	7.16781	7.5937	7.03994	7.31682	7.63563	7.08085	7.35824
7.32364	14_Peptide-MeNH2_1.05_dimer.out	0.0234756	0.190391	0.106933	0.0445788	0.524489	0.284534	0.0841285	0.388937	0.152404	0.1196	0.356333	0.118367	0.0940245	0.0602172	0.0771208	0.148482	0.321162	0.0863397	0.136217	0.104653	0.120435	0.109517	0.0631599	0.0870384	0.126042	0.0972179	0.113808	0.0576735	0.024491	0.0395078	0.0900162	0.0553945	0.0709304		7.30016	7.13324	7.2167	7.27906	6.79915	7.0391	7.40776	6.9347	7.17123	7.44323	6.9673	7.20527
6.98556	14_Peptide-MeNH2_1.10_dimer.out	0.00659672	0.152612	0.0796043	0.0334699	0.445135	0.239302	0.0865488	0.318662	0.116057	0.115894	0.292899	0.0885028	0.0676661	0.0437437	0.0557049	0.146558	0.255425	0.0544337	0.10701	0.0852038	0.096107	0.0833574	0.0466655	0.0656614	0.0969594	0.0779867	0.0896143	0.0375935	0.0155138	0.0252568	0.0687891	0.0462807	0.0560324		6.97896	6.83295	6.90595	6.95209	6.54042	6.74626	7.07211	6.6669	6.8695	7.10145	6.69266	6.89706
5.61042	14_Peptide-MeNH2_1.25_dimer.out	0.0179366	0.080013	0.0310382	0.0165776	0.255537	0.11948	0.0906624	0.175765	0.0425513	0.0872511	0.184087	0.048418	0.029745	0.0172346	0.0234898	0.127705	0.135879	0.00408725	0.0540312	0.0433851	0.0487082	0.0455121	0.0203255	0.0337271	0.0450755	0.0368523	0.0428803	0.0332408	0.0263536	0.0299727	0.0584743	0.0559583	0.0572407		5.62835	5.5304	5.57938	5.62699	5.35488	5.49094	5.70108	5.43465	5.56786	5.69767	5.42633	5.562
3.54879	14_Peptide-MeNH2_1.50_dimer.out	0.0153401	0.0370224	0.0108412	0.0344789	0.122625	0.0440731	0.0753597	0.0777053	0.00117284	0.0609321	0.0960296	0.0175487	0.0240108	0.0103493	0.01718	0.0958	0.0552454	0.0202773	0.0374122	0.0250748	0.0312435	0.0381797	0.0133453	0.0267076	0.0299961	0.0194035	0.0263083	0.0387961	0.0304282	0.0352761	0.0562038	0.0527594	0.0550608		3.56413	3.51177	3.53795	3.58327	3.42616	3.50472	3.62415	3.47108	3.54762	3.60972	3.45276	3.53124
1.4882	14_Peptide-MeNH2_2.00_dimer.out	0.00794453	0.012915	0.00248523	0.0255305	0.0344922	0.00448082	0.0404349	0.0194264	0.0105042	0.0320654	0.0284462	0.0018096	0.0133572	0.0086459	0.0110016	0.047887	0.0118935	0.0179968	0.0182431	0.0135847	0.0159139	0.0182799	0.00965781	0.0142682	0.0156493	0.0116714	0.0142171	0.0219343	0.0185294	0.0206095	0.0291443	0.027212	0.0285595		1.49614	1.47528	1.48571	1.51373	1.45371	1.48372	1.52863	1.46877	1.4987	1.52026	1.45975	1.49001
8.09631	15_Peptide-Peptide_0.90_dimer.out	0.0628779	0.365096	0.213987	0.100152	1.0242	0.562174	0.167901	0.752898	0.292498	0.20546	0.705868	0.250204	0.214185	0.110839	0.162512	0.301928	0.617249	0.15766	0.302057	0.199775	0.250916	0.24823	0.11692	0.183727	0.280062	0.18459	0.236961	0.175694	0.0593062	0.115775	0.253138	0.128722	0.189403		8.03343	7.73121	7.88232	7.99616	7.07211	7.53413	8.26421	7.34341	7.80381	8.30177	7.39044	7.8461
8.58646	15_Peptide-Peptide_0.95_dimer.out	0.0470128	0.306628	0.17682	0.084733	0.886944	0.485838	0.156904	0.640831	0.241963	0.195299	0.595863	0.200282	0.180708	0.0875123	0.13411	0.277723	0.517775	0.120026	0.259921	0.168192	0.214057	0.213359	0.0931607	0.154181	0.239206	0.154207	0.201046	0.141361	0.0382384	0.0880507	0.209913	0.100254	0.153435		8.53945	8.27984	8.40964	8.50173	7.69952	8.10063	8.74337	7.94563	8.3445	8.78176	7.9906	8.38618
8.65929	15_Peptide-Peptide_1.00_dimer.out	0.0463212	0.27156	0.158941	0.0716742	0.768808	0.420241	0.135631	0.558955	0.211662	0.187869	0.501091	0.156611	0.165615	0.0831341	0.124375	0.239284	0.454028	0.107372	0.233574	0.151928	0.192751	0.195604	0.0881654	0.142574	0.214908	0.139662	0.181167	0.112082	0.0197298	0.0635417	0.165535	0.0645065	0.112685		8.61297	8.38773	8.50035	8.58762	7.89048	8.23905	8.79492	8.10034	8.44763	8.84716	8.1582	8.50268
8.46406	15_Peptide-Peptide_1.05_dimer.out	0.0475716	0.240079	0.143825	0.0554441	0.665637	0.360541	0.124138	0.482699	0.179281	0.181676	0.419082	0.118703	0.16015	0.0810081	0.120579	0.213929	0.391231	0.088651	0.21902	0.140978	0.179999	0.18741	0.0855042	0.137006	0.20227	0.130111	0.169663	0.101185	0.011299	0.0536383	0.144078	0.0448639	0.0918944		8.41648	8.22398	8.32023	8.40861	7.79842	8.10352	8.58819	7.98136	8.28477	8.64573	8.04497	8.34535
8.10479	15_Peptide-Peptide_1.10_dimer.out	0.0464429	0.213043	0.129743	0.0439403	0.577069	0.310505	0.118023	0.413883	0.14793	0.169864	0.354621	0.0923783	0.154272	0.0813647	0.117819	0.199005	0.33229	0.0666426	0.207367	0.13486	0.171113	0.179695	0.0854759	0.133015	0.191882	0.125006	0.161638	0.101146	0.0164277	0.0564317	0.139845	0.0453253	0.0903184		8.05835	7.89175	7.97505	8.06085	7.52772	7.79428	8.22281	7.69091	7.95686	8.27465	7.75017	8.01241
6.64877	15_Peptide-Peptide_1.25_dimer.out	0.0409448	0.158087	0.0995161	0.021443	0.385549	0.203496	0.0874442	0.273735	0.0931455	0.130139	0.223487	0.0466741	0.125121	0.0822647	0.103693	0.141888	0.217828	0.0379703	0.160816	0.118919	0.139868	0.15022	0.0867125	0.11928	0.146782	0.109579	0.13111	0.0813671	0.0272051	0.05234	0.105207	0.0430034	0.072279		6.60783	6.49068	6.54925	6.62733	6.26322	6.44527	6.73621	6.37504	6.55563	6.77891	6.42528	6.6021
4.40743	15_Peptide-Peptide_1.50_dimer.out	0.0169331	0.0793996	0.0481663	0.00254887	0.197176	0.0973133	0.0599811	0.135538	0.0377787	0.0741643	0.123614	0.0247249	0.0673607	0.0425931	0.0549769	0.0886972	0.10472	0.00801131	0.0861879	0.0627988	0.0744933	0.0847017	0.0459489	0.0661707	0.0769296	0.0562154	0.0685396	0.0528257	0.0295269	0.0405519	0.0677146	0.0447833	0.0555078		4.3905	4.32803	4.35926	4.40998	4.21025	4.31012	4.46741	4.27189	4.36965	4.48159	4.28381	4.3827
1.7751	15_Peptide-Peptide_2.00_dimer.out	0.00854231	0.0172202	0.0128812	0.00650757	0.0557025	0.0245975	0.0365444	0.0263708	0.00508681	0.0183505	0.0480364	0.0148429	0.0381027	0.0112208	0.0246617	0.0515628	0.0117049	0.0199289	0.0479493	0.0208362	0.0343927	0.0434633	0.0121082	0.027897	0.0447852	0.0188294	0.0324595	0.0567478	0.0349611	0.0466849	0.0716465	0.0535692	0.0633788		1.76656	1.75788	1.76222	1.78161	1.7194	1.7505	1.81165	1.74873	1.78019	1.79345	1.72707	1.76026
4.76122	16_Peptide-Water_0.90_dimer.out	0.0135463	0.209311	0.111429	0.00924813	0.55298	0.281114	0.0922019	0.443475	0.175637	0.128335	0.402732	0.137198	0.0828785	0.0557851	0.0693318	0.142927	0.388722	0.122898	0.116136	0.0916827	0.103909	0.0987358	0.0594044	0.0803943	0.106466	0.0837048	0.097231	0.0458489	0.0111409	0.0268562	0.0690724	0.0301277	0.0480044		4.74767	4.55191	4.64979	4.75197	4.20824	4.4801	4.85342	4.31774	4.58558	4.88955	4.35848	4.62402
5.10831	16_Peptide-Water_0.95_dimer.out	0.0150001	0.180351	0.0976757	0.00259111	0.469494	0.233451	0.089016	0.373795	0.142389	0.129795	0.327931	0.0990678	0.0831967	0.053523	0.0683599	0.132229	0.325946	0.0968586	0.111528	0.0848947	0.0982115	0.0966261	0.0566103	0.0777618	0.103327	0.0780428	0.0925116	0.0414063	0.00326678	0.0204876	0.0584143	0.0156018	0.0352039		5.09331	4.92796	5.01064	5.11091	4.63882	4.87486	5.19733	4.73452	4.96592	5.23811	4.78038	5.00925
5.14965	16_Peptide-Water_1.00_dimer.out	0.0112	0.158018	0.0846089	0.0160358	0.394556	0.18926	0.0917764	0.307976	0.1081	0.132731	0.263296	0.0652824	0.0787149	0.0596999	0.0692074	0.129647	0.264686	0.0675198	0.103544	0.0880821	0.095813	0.0902127	0.0623795	0.0773116	0.0964792	0.0820633	0.0908545	0.036744	0.0107415	0.0218922	0.0502005	0.0205787	0.0335387		5.13845	4.99163	5.06504	5.16569	4.7551	4.96039	5.24143	4.84167	5.04155	5.28238	4.88635	5.08437
5.00493	16_Peptide-Water_1.05_dimer.out	0.00772998	0.135209	0.0714695	0.0325517	0.323853	0.145651	0.0922322	0.254885	0.0813263	0.130704	0.213912	0.0416037	0.0732686	0.0567455	0.0650071	0.122073	0.220401	0.0491641	0.092833	0.0793545	0.0860937	0.0843369	0.0593146	0.072793	0.0863575	0.0738702	0.0815623	0.0338422	0.011849	0.0211119	0.0427235	0.0174515	0.0283207		4.9972	4.86972	4.93346	5.03748	4.68108	4.85928	5.09716	4.75004	4.9236	5.13563	4.79102	4.96333
4.75391	16_Peptide-Water_1.10_dimer.out	0.00377176	0.107175	0.0517015	0.0505937	0.260319	0.104863	0.102088	0.203997	0.0509543	0.127044	0.174383	0.0236694	0.0606878	0.043695	0.0521914	0.127835	0.175836	0.0240002	0.0775686	0.0621583	0.0698635	0.0749257	0.0467688	0.0618602	0.0698603	0.056131	0.0646785	0.0351126	0.0112457	0.0220405	0.0450634	0.0174176	0.03018		4.75768	4.64673	4.7022	4.8045	4.49359	4.64904	4.85599	4.54991	4.70295	4.88095	4.57952	4.73024
3.79918	16_Peptide-Water_1.25_dimer.out	0.00969169	0.0687331	0.0295207	0.0517072	0.16201	0.0551513	0.0906827	0.124655	0.0169863	0.100898	0.106923	0.00301258	0.0434088	0.0320685	0.0377386	0.11017	0.105978	0.00209616	0.0561857	0.0443139	0.0502498	0.0523996	0.0340045	0.0438366	0.0511593	0.0404793	0.0469087	0.0329399	0.0126385	0.0222971	0.0428801	0.017524	0.0299262		3.80887	3.73044	3.76966	3.85088	3.63717	3.74403	3.88986	3.67452	3.78219	3.90007	3.69225	3.79616
2.45383	16_Peptide-Water_1.50_dimer.out	0.00465959	0.038164	0.0167522	0.053471	0.0831994	0.0148642	0.0783277	0.0604752	0.00892622	0.0785245	0.0529963	0.0127641	0.0436397	0.0235359	0.0335878	0.090756	0.0491131	0.0208214	0.0517882	0.0309853	0.0413867	0.0500818	0.0249133	0.0379425	0.0482623	0.0283356	0.0390599	0.043438	0.0153408	0.0293468	0.0515318	0.019686	0.0358049		2.45849	2.41567	2.43708	2.5073	2.37063	2.43897	2.53216	2.39336	2.46276	2.53236	2.40084	2.4666
1.13683	16_Peptide-Water_2.00_dimer.out	0.000668284	0.0129455	0.00613863	0.0405863	0.027606	0.00649015	0.0536527	0.0167532	0.0184498	0.0440996	0.0207664	0.0116666	0.0340701	0.0104491	0.0222596	0.0601859	0.0113268	0.0244296	0.0383535	0.0140069	0.0261802	0.0356119	0.0107364	0.0232382	0.0373347	0.0133295	0.0255447	0.0438602	0.0148467	0.0297553	0.0507963	0.0200702	0.0360458		1.1375	1.12388	1.13069	1.17742	1.10922	1.14332	1.19048	1.12008	1.15528	1.18093	1.11606	1.1485
16.0658	17_Uracil-Uracil_BP_0.90_dimer.out	0.237447	0.807427	0.522437	0.31512	1.95064	1.13288	0.0842282	1.54146	0.728617	0.254925	1.38446	0.564766	0.448348	0.326168	0.387258	0.283902	1.33688	0.526487	0.579262	0.460303	0.519782	0.528105	0.343168	0.441091	0.533356	0.424976	0.489141	0.273418	0.154128	0.206196	0.356932	0.223095	0.281475		15.8283	15.2583	15.5433	15.7506	14.1151	14.9329	16.15	14.5243	15.3371	16.3207	14.6813	15.501
17.1875	17_Uracil-Uracil_BP_0.95_dimer.out	0.217583	0.705691	0.461637	0.251656	1.69545	0.973553	0.0926545	1.34068	0.624011	0.255534	1.18262	0.463541	0.420985	0.289372	0.355179	0.26481	1.16329	0.449241	0.533856	0.405672	0.469764	0.495279	0.305081	0.405134	0.491775	0.373505	0.441766	0.254067	0.116176	0.177853	0.321709	0.166871	0.236375		16.9699	16.4818	16.7258	16.9358	15.492	16.2139	17.2801	15.8468	16.5634	17.443	16.0048	16.7239
17.4054	17_Uracil-Uracil_BP_1.00_dimer.out	0.200945	0.624981	0.412963	0.213604	1.47729	0.845445	0.0826863	1.17274	0.545025	0.257636	0.998763	0.370564	0.386903	0.265853	0.326378	0.230832	1.02046	0.394815	0.484032	0.36569	0.424861	0.453654	0.27987	0.371117	0.446544	0.337231	0.400001	0.207614	0.0752203	0.133591	0.256163	0.102847	0.171122		17.2045	16.7805	16.9925	17.1918	15.9282	16.56	17.4881	16.2327	16.8604	17.6631	16.4067	17.0349
17.0338	17_Uracil-Uracil_BP_1.05_dimer.out	0.189996	0.562223	0.37611	0.197224	1.3005	0.748861	0.0721488	1.02426	0.476053	0.260707	0.835238	0.287266	0.361867	0.259299	0.310583	0.206835	0.886134	0.339649	0.450172	0.349856	0.400014	0.421252	0.271691	0.350267	0.416679	0.324554	0.377856	0.168632	0.0521819	0.101965	0.204578	0.0642847	0.125439		16.8438	16.4716	16.6577	16.8366	15.7333	16.2849	17.1059	16.0095	16.5577	17.2945	16.1985	16.7465
16.293	17_Uracil-Uracil_BP_1.10_dimer.out	0.142393	0.468014	0.305204	0.130065	1.09445	0.612256	0.108786	0.840735	0.365975	0.275699	0.678711	0.201506	0.307075	0.223645	0.26536	0.228212	0.713879	0.242834	0.385375	0.306816	0.346095	0.364721	0.235737	0.303977	0.353419	0.282448	0.324859	0.136023	0.0461046	0.0836151	0.167973	0.0620255	0.10689		16.1506	15.825	15.9878	16.1629	15.1985	15.6807	16.4018	15.4522	15.927	16.5687	15.6143	16.0915
13.1904	17_Uracil-Uracil_BP_1.25_dimer.out	0.0937368	0.313906	0.203821	0.0660853	0.716512	0.391299	0.103548	0.537525	0.216989	0.254429	0.391798	0.0686846	0.223083	0.167294	0.195189	0.188365	0.448032	0.129833	0.278692	0.225969	0.25233	0.267825	0.176371	0.224698	0.254277	0.207911	0.236339	0.0684609	0.00761144	0.0313065	0.0821728	0.00580023	0.0366353		13.0967	12.8765	12.9866	13.1244	12.4739	12.7991	13.294	12.6529	12.9735	13.4449	12.7986	13.1218
8.35706	17_Uracil-Uracil_BP_1.50_dimer.out	0.0787519	0.209729	0.144241	0.0360715	0.391509	0.21379	0.046606	0.29965	0.126522	0.145853	0.209097	0.0316221	0.160941	0.150775	0.155858	0.0879447	0.25372	0.0828877	0.188044	0.180888	0.184466	0.189719	0.156473	0.174628	0.17299	0.16997	0.174696	0.0592325	0.0515507	0.0509895	0.0587765	0.0440786	0.0464424		8.27831	8.14733	8.21282	8.32099	7.96556	8.14327	8.40367	8.05741	8.23054	8.50292	8.14797	8.32544
3.33743	17_Uracil-Uracil_BP_2.00_dimer.out	0.0288183	0.0742	0.0515091	0.01643	0.139961	0.0617657	0.053284	0.0996097	0.0231628	0.0658386	0.0892875	0.0117245	0.0826474	0.0575405	0.070094	0.071711	0.0794338	0.00386137	0.0947288	0.0707685	0.0827487	0.0940652	0.0594557	0.0770224	0.0886566	0.0669057	0.0790337	0.0697815	0.0462298	0.0574541	0.0783767	0.0551735	0.0661125		3.30861	3.26323	3.28592	3.35386	3.19746	3.27566	3.39071	3.23782	3.31426	3.40326	3.24814	3.3257
6.4838	18_Water-Pyridine_0.90_dimer.out	0.0320024	0.240747	0.104372	0.0657306	0.669262	0.301766	0.187411	0.525561	0.169075	0.224488	0.485406	0.130459	0.0698887	0.0540135	0.0619511	0.248251	0.45371	0.10273	0.109778	0.101121	0.105449	0.0795829	0.0562991	0.0688236	0.102399	0.0945624	0.100157	0.0318917	0.010013	0.0192785	0.0614849	0.0404538	0.0492854		6.5158	6.24305	6.37943	6.54953	5.81454	6.18203	6.67121	5.95824	6.31473	6.70829	5.99839	6.35334
6.87005	18_Water-Pyridine_0.95_dimer.out	0.0305434	0.20414	0.0867985	0.0796365	0.565253	0.242808	0.183423	0.440544	0.12856	0.219022	0.402324	0.091651	0.0696896	0.0491461	0.0594179	0.235316	0.378189	0.0714365	0.103713	0.0900281	0.0968703	0.0815298	0.0518614	0.0676972	0.0958033	0.0831747	0.091271	0.0332073	0.0072667	0.0186314	0.057345	0.0322851	0.0431887		6.90059	6.66591	6.78325	6.94969	6.3048	6.62724	7.05347	6.42951	6.74149	7.08907	6.46773	6.7784
6.87888	18_Water-Pyridine_1.00_dimer.out	0.0330937	0.168595	0.0677508	0.0901156	0.471645	0.190764	0.180706	0.361916	0.0906051	0.208835	0.331917	0.0615409	0.063686	0.0418474	0.0527667	0.226001	0.307052	0.0405254	0.0933831	0.0778182	0.0856006	0.0751661	0.0445059	0.060833	0.0859612	0.0713605	0.0803352	0.0348589	0.00897548	0.0206494	0.056745	0.0324948	0.0433292		6.91197	6.71028	6.81113	6.969	6.40723	6.68812	7.05959	6.51696	6.78827	7.08771	6.54696	6.81734
6.65261	18_Water-Pyridine_1.05_dimer.out	0.0320866	0.142819	0.0553663	0.0857863	0.400418	0.157316	0.171253	0.298732	0.0637392	0.194951	0.274352	0.0397003	0.0591558	0.0405975	0.0498767	0.213987	0.247888	0.016951	0.0871733	0.0739321	0.0805527	0.0702186	0.04318	0.0576806	0.0800662	0.0677592	0.0755152	0.03487	0.0138832	0.0233127	0.0563069	0.0370986	0.0455902		6.68469	6.50979	6.59724	6.73839	6.25219	6.49529	6.82386	6.35387	6.58887	6.84756	6.37825	6.61291
6.28924	18_Water-Pyridine_1.10_dimer.out	0.0461716	0.106455	0.0301417	0.101068	0.319725	0.109329	0.172304	0.23476	0.0312281	0.183331	0.224662	0.0206657	0.0365249	0.0223339	0.0294294	0.207922	0.192277	0.00782236	0.0598773	0.0501871	0.0550322	0.0480333	0.0250508	0.0375934	0.0529185	0.044142	0.0500993	0.0252241	0.0112694	0.0177575	0.0455144	0.0349315	0.0396701		6.33542	6.18279	6.2591	6.39031	5.96952	6.17992	6.46155	6.05448	6.25802	6.47258	6.06458	6.26858
4.92902	18_Water-Pyridine_1.25_dimer.out	0.0422345	0.0625572	0.0101614	0.0927897	0.18931	0.0482599	0.145026	0.128812	0.00810725	0.138841	0.132441	0.00319965	0.0251594	0.0191184	0.0221389	0.171145	0.098563	0.0362908	0.0422835	0.0389506	0.0406171	0.0344276	0.0210333	0.0283037	0.0368055	0.0346775	0.0369366	0.0314986	0.0230954	0.027562	0.0503403	0.0444341	0.0477547		4.97126	4.86647	4.91886	5.02181	4.73971	4.88076	5.07405	4.80021	4.93713	5.06786	4.79658	4.93222
3.00623	18_Water-Pyridine_1.50_dimer.out	0.0388194	0.0220453	0.00838704	0.0822908	0.0676124	0.00733923	0.105778	0.0394636	0.0331571	0.0929057	0.0562098	0.0183479	0.00508085	0.0106253	0.00785308	0.117521	0.0253892	0.0460661	0.0127803	0.019853	0.0163166	0.014979	0.0128075	0.0146428	0.00772427	0.0158154	0.0128806	0.0182723	0.0289752	0.0242179	0.0295461	0.0451537	0.0378554		3.04505	2.98418	3.01462	3.08852	2.93862	3.01357	3.11201	2.96677	3.03939	3.09914	2.95002	3.02458
1.18444	18_Water-Pyridine_2.00_dimer.out	0.0197961	0.00247745	0.00865931	0.0222446	0.0241476	0.00095151	0.0313982	0.0153029	0.00804768	0.0312399	0.0114827	0.00987856	0.0121893	0.00593135	0.00906031	0.0359751	0.0108805	0.0125473	0.00918854	0.0030319	0.00611022	0.00995084	0.005441	0.00752957	0.0104264	0.00399056	0.006939	0.012027	0.0101173	0.0110835	0.00898224	0.0088035	0.00877309		1.20424	1.18197	1.1931	1.20669	1.1603	1.18349	1.21584	1.16914	1.19249	1.21568	1.17296	1.19432
6.8755	19_MeOH-Pyridine_0.90_dimer.out	0.013101	0.289969	0.138434	0.0481571	0.773939	0.362891	0.208552	0.591077	0.191263	0.260028	0.539004	0.139488	0.115043	0.0925525	0.103798	0.28875	0.499647	0.105449	0.167624	0.152498	0.160061	0.125295	0.0944541	0.110292	0.159041	0.145749	0.154272	0.0622908	0.035492	0.0465845	0.100577	0.0738232	0.0847586		6.8886	6.58553	6.73707	6.92366	6.10156	6.51261	7.08406	6.28443	6.68424	7.13553	6.3365	6.73602
7.37372	19_MeOH-Pyridine_0.95_dimer.out	0.0186868	0.245412	0.113363	0.0677746	0.653324	0.292775	0.206747	0.495072	0.144162	0.247802	0.452461	0.102329	0.104612	0.0817267	0.0931695	0.276234	0.415946	0.0698563	0.15017	0.133604	0.141887	0.117264	0.0841787	0.101342	0.141028	0.126485	0.13575	0.0625388	0.0350348	0.0469419	0.0966962	0.069226	0.0810442		7.3924	7.12831	7.26036	7.44149	6.72039	7.08094	7.58047	6.87865	7.22956	7.62152	6.92126	7.27139
7.44822	19_MeOH-Pyridine_1.00_dimer.out	0.0256004	0.203722	0.0890609	0.0729528	0.554686	0.240867	0.207827	0.402401	0.0972872	0.230011	0.380653	0.0753213	0.0938736	0.0734614	0.0836675	0.275264	0.326259	0.0254974	0.138088	0.123383	0.130735	0.108018	0.0762725	0.0929086	0.128372	0.115815	0.124212	0.0711395	0.0496308	0.0593942	0.109194	0.0905256	0.0987878		7.47382	7.2445	7.35916	7.52118	6.89354	7.20736	7.65605	7.04582	7.35094	7.67823	7.06757	7.3729
7.25343	19_MeOH-Pyridine_1.05_dimer.out	0.037473	0.162867	0.062697	0.0780116	0.468976	0.195482	0.199058	0.333599	0.0672707	0.216294	0.313915	0.0488104	0.0684676	0.0509291	0.0596984	0.259581	0.265911	0.00316493	0.108149	0.0953079	0.101728	0.0833711	0.0539691	0.0695526	0.0984289	0.0877217	0.0951962	0.050804	0.0293597	0.039299	0.0856989	0.0655682	0.0748794		7.2909	7.09056	7.19073	7.33144	6.78445	7.05795	7.45249	6.91983	7.18616	7.46972	6.93951	7.20462
6.89666	19_MeOH-Pyridine_1.10_dimer.out	0.0644619	0.112783	0.0241605	0.0965761	0.374285	0.138855	0.205287	0.254096	0.0244049	0.20383	0.25301	0.0245899	0.0278676	0.0201329	0.0240002	0.259642	0.194002	0.03282	0.0635047	0.0595329	0.0615188	0.0443321	0.0236157	0.0350734	0.0533821	0.0515536	0.0546831	0.0293599	0.0189427	0.0242047	0.0654014	0.057892	0.0617879		6.96112	6.78388	6.8725	6.99324	6.52238	6.75781	7.10195	6.64257	6.87226	7.10049	6.64365	6.87207
5.47291	19_MeOH-Pyridine_1.25_dimer.out	0.0623478	0.0599755	0.00118614	0.0981027	0.210539	0.0562183	0.165487	0.134911	0.0152881	0.145971	0.15564	0.00483421	0.0052741	0.0108451	0.00805959	0.19918	0.0970972	0.0510413	0.027364	0.0356372	0.0315006	0.0190778	0.0137749	0.0173582	0.0194614	0.0294445	0.0261793	0.0252743	0.0335585	0.0302956	0.0527835	0.0669543	0.0607668		5.53526	5.41294	5.4741	5.57101	5.26237	5.41669	5.6384	5.338	5.4882	5.61888	5.31727	5.46808
3.37293	19_MeOH-Pyridine_1.50_dimer.out	0.0564372	0.01737	0.0195336	0.0897783	0.0752788	0.00724979	0.120015	0.0411703	0.0394225	0.09412	0.0721689	0.0109756	0.0147534	0.00176565	0.00649385	0.135134	0.024116	0.0555088	0.0048412	0.012947	0.0040529	0.000999279	0.00476492	0.00289128	0.0118078	0.00749109	0.000636726	0.011784	0.0357327	0.0249412	0.0288868	0.0597805	0.0454264		3.42936	3.35556	3.39246	3.46271	3.29765	3.38018	3.49294	3.33176	3.41235	3.46705	3.30076	3.3839
1.32821	19_MeOH-Pyridine_2.00_dimer.out	0.0341279	0.00354769	0.0188378	0.0366262	0.0178049	0.00941065	0.0555386	0.00188299	0.0287108	0.037024	0.0200267	0.00849867	0.0200904	0.00463913	0.0123647	0.0649948	0.0117269	0.0383608	0.0138905	0.00181488	0.00603783	0.0155788	0.00366686	0.00930358	0.0163969	0.000129812	0.00771741	0.00111663	0.0193686	0.0099705	0.0102243	0.0349166	0.0233589		1.36234	1.33176	1.34705	1.36484	1.3104	1.33762	1.38375	1.33009	1.35692	1.36523	1.30818	1.33671
17.9251	20_AcOH-AcOH_0.90_dimer.out	0.224356	0.839453	0.531905	0.533234	2.11655	1.32489	0.20913	1.78196	0.995547	0.107704	1.65039	0.879045	0.234339	0.22151	0.227925	0.0470777	1.61467	0.830876	0.340586	0.331191	0.335889	0.300348	0.236911	0.274478	0.302751	0.299923	0.309736	0.130398	0.0773316	0.099185	0.208481	0.1324	0.166447		17.7008	17.0857	17.3932	17.3919	15.8086	16.6003	17.716	16.1432	16.9296	17.8174	16.2748	17.0461
19.1701	20_AcOH-AcOH_0.95_dimer.out	0.223677	0.740396	0.482037	0.48439	1.86422	1.1743	0.17526	1.53522	0.855241	0.0802883	1.41093	0.745611	0.255421	0.21928	0.237351	0.0206954	1.37072	0.69571	0.356759	0.327131	0.341945	0.325153	0.235747	0.286825	0.317607	0.294286	0.314679	0.158094	0.0830895	0.116205	0.23306	0.139353	0.182498		18.9464	18.4297	18.6881	18.6857	17.3059	17.9958	18.9948	17.6349	18.3148	19.0898	17.7592	18.4245
19.3967	20_AcOH-AcOH_1.00_dimer.out	0.214885	0.653766	0.434326	0.433434	1.63353	1.03348	0.14999	1.33967	0.74483	0.0685755	1.22332	0.64595	0.257433	0.204064	0.230749	0.00826838	1.19274	0.600504	0.35035	0.300397	0.325373	0.330144	0.220789	0.281668	0.310482	0.267858	0.297986	0.173999	0.0765782	0.121482	0.244309	0.12462	0.181561		19.1818	18.743	18.9624	18.9633	17.7632	18.3632	19.2467	18.057	18.6519	19.3281	18.1734	18.7508
18.9647	20_AcOH-AcOH_1.05_dimer.out	0.200551	0.573226	0.386889	0.405591	1.44799	0.926791	0.130239	1.16565	0.647943	0.0536286	1.0573	0.555463	0.246651	0.184815	0.215733	0.00743704	1.02447	0.508518	0.336916	0.277373	0.307144	0.312179	0.199997	0.261787	0.300496	0.247517	0.282071	0.16814	0.066092	0.11354	0.237132	0.113678	0.172641		18.7642	18.3915	18.5778	18.5591	17.5167	18.0379	18.8345	17.7991	18.3168	18.9111	17.9074	18.4092
18.1251	20_AcOH-AcOH_1.10_dimer.out	0.181611	0.506431	0.344021	0.358937	1.26599	0.812464	0.121393	1.02766	0.574525	0.00476326	0.867671	0.431454	0.221092	0.164698	0.192895	0.0026213	0.908488	0.455555	0.298963	0.242829	0.270896	0.279729	0.178193	0.233969	0.26659	0.21655	0.248717	0.0918061	0.0106065	0.0347959	0.134646	0.00111998	0.0628119		17.9435	17.6187	17.7811	17.7662	16.8591	17.3127	18.0037	17.0975	17.5506	18.1299	17.2575	17.6937
14.6347	20_AcOH-AcOH_1.25_dimer.out	0.135484	0.352258	0.243871	0.240335	0.859393	0.549864	0.0632495	0.678173	0.370711	0.0561146	0.520839	0.232362	0.182843	0.138577	0.16071	0.0252935	0.587562	0.281134	0.240895	0.197984	0.21944	0.221014	0.147182	0.187179	0.219269	0.18063	0.204708	0.0605184	0.0338223	0.007829	0.085425	0.0397185	0.0182235		14.4993	14.2825	14.3909	14.3944	13.7754	14.0849	14.5715	13.9566	14.264	14.6909	14.1139	14.4024
9.21926	20_AcOH-AcOH_1.50_dimer.out	0.100184	0.22405	0.162117	0.101423	0.412632	0.257027	0.0367751	0.351596	0.194186	0.0625908	0.242691	0.09005	0.141758	0.140426	0.141092	0.00445136	0.321079	0.162765	0.16295	0.160434	0.161692	0.172062	0.147132	0.161917	0.14765	0.148545	0.151432	0.0399275	0.0210909	0.0260172	0.0335279	0.00410351	0.0102357		9.11907	8.99521	9.05714	9.11784	8.80663	8.96223	9.18248	8.86766	9.02507	9.28185	8.97657	9.12921
3.59408	20_AcOH-AcOH_2.00_dimer.out	0.0189612	0.0750942	0.0470277	0.0300257	0.143972	0.086999	0.0079326	0.110571	0.0513194	0.0259769	0.0844911	0.0292571	0.0365938	0.0518342	0.044214	0.0269118	0.0938708	0.0334795	0.0490372	0.0627837	0.0559104	0.046323	0.0539596	0.0508584	0.0437017	0.0587292	0.0523706	0.018102	0.0232565	0.0198343	0.0255348	0.023381	0.0238228		3.57512	3.51898	3.54705	3.56405	3.45011	3.50708	3.60201	3.48351	3.54276	3.62006	3.50959	3.56482
15.2739	21_AcNH2-AcNH2_0.90_dimer.out	0.206576	0.636355	0.421466	0.487513	1.71686	1.10219	0.178891	1.3958	0.787344	0.1034	1.30878	0.706092	0.224728	0.138439	0.181583	0.0245796	1.23527	0.629923	0.3259	0.243689	0.284794	0.288606	0.153388	0.226701	0.289408	0.213414	0.259522	0.147365	0.0430924	0.0917961	0.227574	0.112226	0.16662		15.0673	14.6375	14.8524	14.7864	13.557	14.1717	15.095	13.8781	14.4866	15.1705	13.9651	14.5678
16.2994	21_AcNH2-AcNH2_0.95_dimer.out	0.198812	0.5629	0.380856	0.440165	1.49507	0.967616	0.159547	1.20312	0.681332	0.0853897	1.1173	0.601347	0.224555	0.143153	0.183854	0.0192378	1.05714	0.538189	0.316547	0.238859	0.277703	0.283957	0.156984	0.225705	0.28277	0.210952	0.254358	0.148559	0.0491224	0.0954672	0.219958	0.109211	0.161372		16.1006	15.7365	15.9186	15.8593	14.8044	15.3318	16.1399	15.0963	15.6181	16.214	15.1821	15.6981
16.4717	21_AcNH2-AcNH2_1.00_dimer.out	0.174786	0.486645	0.330716	0.394975	1.29456	0.844768	0.143661	1.03447	0.589065	0.063076	0.939654	0.501365	0.195193	0.127474	0.161333	0.0180049	0.904421	0.461213	0.277578	0.212737	0.245157	0.247423	0.139621	0.198111	0.247766	0.188152	0.224572	0.112609	0.0235802	0.0644214	0.172616	0.0694897	0.117606		16.2969	15.985	16.141	16.0767	15.1771	15.6269	16.328	15.4372	15.8826	16.4086	15.532	15.9703
16.094	21_AcNH2-AcNH2_1.05_dimer.out	0.155824	0.424013	0.289919	0.367618	1.14133	0.754472	0.117647	0.877272	0.49746	0.0144942	0.759489	0.386992	0.180855	0.126841	0.153848	0.00733894	0.745246	0.368954	0.2628	0.213402	0.238101	0.226393	0.137481	0.185986	0.236049	0.191129	0.219541	0.0751441	0.00222099	0.0317764	0.128445	0.0354525	0.0774352		15.9382	15.67	15.8041	15.7264	14.9527	15.3396	15.9764	15.2168	15.5966	16.0795	15.3345	15.707
15.3796	21_AcNH2-AcNH2_1.10_dimer.out	0.141119	0.370104	0.255612	0.317054	0.978468	0.647761	0.101424	0.751754	0.426589	0.0198599	0.615896	0.298018	0.167145	0.119881	0.143513	0.00639041	0.638397	0.316004	0.237832	0.194202	0.216017	0.206616	0.128952	0.171142	0.21467	0.175181	0.200057	0.0428522	0.0289867	0.0014363	0.0798608	0.0110559	0.0290212		15.2384	15.0095	15.124	15.0625	14.4011	14.7318	15.2781	14.6278	14.953	15.3994	14.7637	15.0815
12.4598	21_AcNH2-AcNH2_1.25_dimer.out	0.126199	0.278851	0.202525	0.193535	0.614874	0.404205	0.0549593	0.467241	0.2611	0.053325	0.357473	0.152074	0.172906	0.155336	0.164121	0.0143287	0.393424	0.189548	0.218334	0.203733	0.211034	0.201409	0.161945	0.18416	0.20203	0.190233	0.199753	0.0619366	0.035057	0.043643	0.0772955	0.0378931	0.0524646		12.3336	12.181	12.2573	12.2663	11.8449	12.0556	12.4049	11.9926	12.1987	12.5131	12.1023	12.3077
8.00668	21_AcNH2-AcNH2_1.50_dimer.out	0.107375	0.189325	0.14835	0.106648	0.314487	0.210567	0.0642547	0.264791	0.164523	0.02351	0.172069	0.0742792	0.135647	0.139847	0.137747	0.0430582	0.239943	0.141501	0.149544	0.156138	0.152841	0.152026	0.143699	0.149344	0.141091	0.14901	0.146939	0.0457053	0.038245	0.0380237	0.0352317	0.0160502	0.0215893		7.8993	7.81735	7.85833	7.90003	7.69219	7.79611	7.94242	7.74189	7.84215	8.03019	7.83461	7.9324
3.00804	21_AcNH2-AcNH2_2.00_dimer.out	0.0184416	0.0426143	0.030528	0.0204435	0.0903877	0.0554156	0.00586889	0.0677874	0.0368281	0.00460016	0.0643011	0.0344506	0.0266847	0.0261099	0.0263973	0.00141842	0.0564873	0.0275344	0.0314626	0.0335187	0.0324906	0.031894	0.0271672	0.0298337	0.0287472	0.0313797	0.0306576	0.0253845	0.0222898	0.0237701	0.0298101	0.0282515	0.0290327		2.9896	2.96542	2.97751	2.98759	2.91765	2.95262	3.00217	2.94025	2.97121	3.00344	2.94374	2.97359
18.3243	22_AcOH-Uracil_0.90_dimer.out	0.232665	0.830254	0.531459	0.407151	2.02902	1.21809	0.0756219	1.67561	0.875617	0.0350974	1.5328	0.748853	0.335627	0.276008	0.305817	0.0901424	1.49891	0.704382	0.444308	0.391862	0.418085	0.408104	0.292413	0.356175	0.403363	0.358615	0.39003	0.222162	0.119522	0.165737	0.300098	0.176101	0.233717		18.0916	17.494	17.7928	17.9171	16.2952	17.1062	18.2486	16.6486	17.4486	18.3593	16.7914	17.5754
19.5241	22_AcOH-Uracil_0.95_dimer.out	0.231366	0.743514	0.48744	0.399362	1.82204	1.1107	0.0732713	1.47078	0.772025	0.0513006	1.31784	0.633271	0.335018	0.266695	0.300856	0.0897738	1.29515	0.602686	0.441916	0.381846	0.411881	0.408898	0.283402	0.352165	0.40047	0.348164	0.383471	0.207356	0.099115	0.147528	0.279663	0.150788	0.210076		19.2927	18.7806	19.0367	19.1247	17.7021	18.4134	19.4508	18.0533	18.7521	19.5754	18.2063	18.8908
19.7586	22_AcOH-Uracil_1.00_dimer.out	0.207898	0.648382	0.42814	0.326589	1.5698	0.948196	0.0506637	1.27837	0.664516	0.0554551	1.13931	0.541928	0.310987	0.235342	0.273164	0.0872989	1.13265	0.522676	0.40144	0.330879	0.366159	0.380699	0.251048	0.321489	0.363113	0.300008	0.340002	0.202236	0.0829694	0.1377	0.263222	0.120789	0.187866		19.5507	19.1103	19.3305	19.432	18.1888	18.8104	19.708	18.4803	19.0941	19.8141	18.6193	19.2167
19.3605	22_AcOH-Uracil_1.05_dimer.out	0.188211	0.571961	0.380086	0.289698	1.37732	0.83351	0.030444	1.10329	0.566868	0.0740198	0.969366	0.447673	0.291648	0.223602	0.257625	0.0991828	0.966278	0.433547	0.376636	0.313434	0.345035	0.354536	0.237715	0.301136	0.341808	0.285446	0.321293	0.184594	0.0768511	0.12591	0.240574	0.111095	0.171676		19.1723	18.7886	18.9805	19.0708	17.9832	18.527	19.3301	18.2572	18.7937	19.4346	18.3912	18.9129
18.5649	22_AcOH-Uracil_1.10_dimer.out	0.164168	0.49924	0.331704	0.253132	1.20486	0.728998	0.0140289	0.954197	0.484113	0.102266	0.803983	0.350858	0.262605	0.200954	0.23178	0.105523	0.828863	0.36167	0.340987	0.283128	0.312057	0.319902	0.213761	0.271344	0.309183	0.25769	0.290427	0.143426	0.0363552	0.0845276	0.189515	0.0561796	0.11825		18.4008	18.0657	18.2332	18.3118	17.3601	17.8359	18.5509	17.6107	18.0808	18.6672	17.7609	18.2141
15.1977	22_AcOH-Uracil_1.25_dimer.out	0.131407	0.355688	0.243547	0.163751	0.81407	0.48891	0.000649607	0.636164	0.317757	0.127146	0.479945	0.176399	0.217987	0.171798	0.194893	0.0828499	0.547211	0.232181	0.271881	0.230119	0.251	0.258974	0.180833	0.223007	0.249293	0.212149	0.235678	0.0883532	0.000619424	0.0386863	0.107121	0.00590092	0.0454069		15.0663	14.842	14.9542	15.034	14.3837	14.7088	15.1984	14.5616	14.88	15.3249	14.7178	15.0213
9.86735	22_AcOH-Uracil_1.50_dimer.out	0.101935	0.230739	0.166337	0.0603996	0.405544	0.232972	0.00134775	0.34114	0.171244	0.0759435	0.243788	0.0839222	0.167883	0.158356	0.16312	0.0281782	0.308938	0.14038	0.187241	0.179469	0.183355	0.19629	0.164574	0.182537	0.172937	0.168288	0.173735	0.088675	0.0516817	0.0666256	0.0865709	0.0323872	0.0563536		9.76541	9.63661	9.70101	9.80695	9.4618	9.63437	9.866	9.52621	9.6961	9.94329	9.62356	9.78342
4.14991	22_AcOH-Uracil_2.00_dimer.out	0.0307888	0.0752308	0.0530098	0.000662229	0.144282	0.0718099	0.0163866	0.125782	0.0546976	0.025451	0.0995096	0.0370293	0.0617186	0.0420878	0.0519032	0.0242488	0.116532	0.0461415	0.0668733	0.0481525	0.0575129	0.0707569	0.0440716	0.0580897	0.0623972	0.0446268	0.0544913	0.0524294	0.0132997	0.032379	0.0550671	0.00845972	0.0318159		4.11912	4.07468	4.0969	4.15057	4.00563	4.0781	4.1663	4.02413	4.09521	4.17536	4.0504	4.11288
18.0758	23_AcNH2-Uracil_0.90_dimer.out	0.24925	0.76555	0.5074	0.444571	1.89876	1.17167	0.0949421	1.53402	0.814483	0.012266	1.4189	0.703317	0.35042	0.261711	0.306066	0.0798722	1.35165	0.635891	0.465034	0.38128	0.423157	0.416425	0.276456	0.351631	0.426573	0.350439	0.396966	0.240553	0.135564	0.183223	0.325398	0.207348	0.261476		17.8266	17.3103	17.5684	17.6313	16.1771	16.9042	17.9809	16.5418	17.2614	18.0881	16.6569	17.3725
19.1946	23_AcNH2-Uracil_0.95_dimer.out	0.226077	0.670794	0.448435	0.407931	1.67842	1.04318	0.0816169	1.33836	0.709988	0.030388	1.21569	0.59265	0.320789	0.233114	0.276952	0.0815401	1.16833	0.543394	0.427761	0.344593	0.386177	0.383403	0.247154	0.320255	0.391407	0.315374	0.361392	0.206006	0.0986945	0.147287	0.281876	0.159256	0.215518		18.9685	18.5238	18.7462	18.7867	17.5162	18.1514	19.113	17.8562	18.4846	19.225	17.9789	18.6019
19.4317	23_AcNH2-Uracil_1.00_dimer.out	0.22121	0.606371	0.41379	0.372806	1.48178	0.927295	0.0816939	1.17422	0.627959	0.0492905	1.03202	0.491367	0.312681	0.234068	0.273374	0.0638621	1.02044	0.478291	0.408113	0.334891	0.371502	0.371782	0.24729	0.314204	0.374214	0.307632	0.348386	0.178448	0.0782512	0.122435	0.237508	0.120053	0.172841		19.2104	18.8253	19.0179	19.0589	17.9499	18.5044	19.35	18.2574	18.8037	19.4809	18.3996	18.9403
19.0856	23_AcNH2-Uracil_1.05_dimer.out	0.195378	0.523672	0.359525	0.328626	1.29324	0.810931	0.0634853	1.01441	0.538948	0.0627973	0.880758	0.40898	0.281851	0.201927	0.241889	0.0690852	0.874997	0.402956	0.368769	0.293331	0.33105	0.335996	0.214004	0.27924	0.337751	0.268476	0.309935	0.152437	0.0554761	0.0982695	0.204288	0.0914059	0.142024		18.8902	18.5619	18.7261	18.757	17.7924	18.2747	19.0221	18.0712	18.5466	19.1484	18.2048	18.6766
18.3674	23_AcNH2-Uracil_1.10_dimer.out	0.176501	0.456964	0.316733	0.291126	1.12778	0.709453	0.047801	0.874287	0.461044	0.0915491	0.724367	0.316409	0.260881	0.183353	0.222117	0.0738613	0.747541	0.33684	0.340647	0.266452	0.30355	0.309942	0.194302	0.255969	0.312466	0.243905	0.28438	0.118075	0.019076	0.0622889	0.159146	0.0399486	0.0931901		18.1909	17.9104	18.0506	18.0762	17.2396	17.6579	18.3196	17.4931	17.9063	18.4589	17.643	18.051
15.2646	23_AcNH2-Uracil_1.25_dimer.out	0.138714	0.333862	0.236288	0.188096	0.746377	0.467237	0.0245845	0.577161	0.300873	0.106004	0.43785	0.165923	0.213542	0.174347	0.193944	0.0571714	0.492552	0.21769	0.267144	0.229819	0.248481	0.251506	0.182545	0.219729	0.245946	0.213355	0.234269	0.0797146	0.0216957	0.0448193	0.0970545	0.0193451	0.052209		15.1258	14.9307	15.0283	15.0765	14.5182	14.7973	15.24	14.6874	14.9637	15.3706	14.8267	15.0986
10.2404	23_AcNH2-Uracil_1.50_dimer.out	0.120726	0.231148	0.175937	0.121806	0.422527	0.272167	0.0547928	0.351412	0.203102	0.0559055	0.231759	0.0879266	0.163953	0.1523	0.158126	0.0212861	0.315855	0.16857	0.185922	0.175612	0.180767	0.18589	0.156978	0.172937	0.174349	0.166736	0.173055	0.0505097	0.021188	0.0308523	0.0417389	0.00516312	0.0132537		10.1196	10.0092	10.0644	10.1186	9.81783	9.96819	10.1856	9.88895	10.0373	10.2963	10.0086	10.1524
4.66191	23_AcNH2-Uracil_2.00_dimer.out	0.0424775	0.085277	0.0638772	0.0267215	0.159386	0.0930535	0.00248898	0.12485	0.0611807	0.0100182	0.107927	0.0489546	0.0719591	0.0593313	0.0656452	0.0170942	0.107583	0.0452443	0.0815348	0.0706526	0.0760937	0.0817648	0.0613553	0.0721646	0.0763798	0.0667358	0.0726738	0.0642431	0.0407878	0.0521349	0.0717281	0.0450849	0.0583119		4.61944	4.57664	4.59804	4.63519	4.50253	4.56886	4.6644	4.53706	4.60073	4.67193	4.55399	4.61296
-0.137809	24_Benzene-Benzene_pi-pi_0.90_dimer.out	0.232071	0.338625	0.0532771	0.910738	0.921969	0.00561542	1.20421	0.64105	0.281582	1.25132	0.552573	0.349372	0.405299	0.140345	0.272822	1.35095	0.50059	0.42518	0.501505	0.232435	0.36697	0.294679	0.111551	0.190326	0.544339	0.272405	0.398486	0.357027	0.0433964	0.197911	0.440153	0.098763	0.268375		0.0942622	-0.476434	-0.191086	0.772929	-1.05978	-0.143424	1.0664	-0.778858	0.143773	1.11351	-0.690382	0.211563
1.79077	24_Benzene-Benzene_pi-pi_0.95_dimer.out	0.245524	0.225382	0.010071	0.860344	0.645808	0.107268	1.07204	0.444849	0.313593	1.09456	0.391282	0.351639	0.296366	0.0814915	0.188928	1.17788	0.344369	0.416756	0.365761	0.147369	0.256565	0.180988	0.0514257	0.102836	0.412759	0.190987	0.291045	0.273283	0.0227943	0.146886	0.336424	0.0664383	0.201231		2.03629	1.56539	1.80084	2.65111	1.14496	1.89804	2.8628	1.34592	2.10436	2.88533	1.39949	2.14241
2.52128	24_Benzene-Benzene_pi-pi_1.00_dimer.out	0.245946	0.146123	0.0499116	0.818605	0.436929	0.190838	0.988295	0.271056	0.35862	0.962201	0.271874	0.345163	0.240764	0.0642121	0.152488	1.07314	0.188119	0.44251	0.296391	0.118588	0.20749	0.139393	0.0376123	0.0765705	0.338084	0.157421	0.238136	0.267505	0.065109	0.167358	0.330378	0.119825	0.227061		2.76723	2.37516	2.57119	3.33989	2.08435	2.71212	3.50958	2.25022	2.8799	3.48348	2.24941	2.86644
2.63293	24_Benzene-Benzene_pi-pi_1.05_dimer.out	0.273207	0.0500819	0.111563	0.776983	0.259227	0.258878	0.892363	0.148168	0.372097	0.839574	0.195675	0.32195	0.132732	0.0142266	0.0592529	0.950052	0.092638	0.428707	0.170556	0.0221806	0.0963681	0.0506256	0.0358458	0.0023491	0.204868	0.0542269	0.121626	0.18683	0.0378297	0.114668	0.239311	0.0939552	0.169303		2.90613	2.58284	2.74449	3.40991	2.3737	2.8918	3.52529	2.48476	3.00502	3.4725	2.43725	2.95488
2.44969	24_Benzene-Benzene_pi-pi_1.10_dimer.out	0.277615	0.00896926	0.143292	0.757	0.13054	0.31323	0.842752	0.0451441	0.398804	0.72845	0.136571	0.29594	0.0929078	0.0444479	0.0242299	0.885628	0.00244615	0.441591	0.121019	0.0164536	0.0522825	0.0352045	0.0598531	0.0193806	0.145018	0.00625406	0.070071	0.210044	0.0557343	0.137899	0.269894	0.121677	0.201889		2.72731	2.45866	2.59298	3.20669	2.31915	2.76292	3.29244	2.40455	2.84849	3.17814	2.31312	2.74563
1.47949	24_Benzene-Benzene_pi-pi_1.25_dimer.out	0.292368	0.144372	0.21837	0.586674	0.0595783	0.323126	0.636909	0.108932	0.37292	0.457701	0.0470638	0.205318	0.0664744	0.167608	0.117041	0.662026	0.133609	0.397818	0.0500065	0.151429	0.100718	0.0753278	0.171345	0.125795	0.047236	0.146503	0.0977023	0.117178	0.00332645	0.0681663	0.183409	0.0842536	0.143045		1.77186	1.62386	1.69786	2.06616	1.53907	1.80261	2.1164	1.58842	1.85241	1.93719	1.43242	1.68481
0.468184	24_Benzene-Benzene_pi-pi_1.50_dimer.out	0.265958	0.202274	0.234116	0.352755	0.151962	0.252359	0.397701	0.193912	0.295806	0.185776	0.00509577	0.0903402	0.179583	0.207756	0.193669	0.420174	0.214887	0.31753	0.164849	0.194004	0.179426	0.16338	0.205062	0.183874	0.173284	0.199135	0.184489	0.0375986	0.010309	0.0333799	0.11118	0.106662	0.119407		0.734142	0.670458	0.7023	0.82094	0.620147	0.720543	0.865886	0.662096	0.763991	0.653961	0.463089	0.558525
0.0586454	24_Benzene-Benzene_pi-pi_2.00_dimer.out	0.0515518	0.0373693	0.0444605	0.0738334	0.0208993	0.0473664	0.0888654	0.0333562	0.0611108	0.0802673	0.0268666	0.053567	0.0270877	0.0400003	0.033544	0.0963815	0.0395847	0.0679831	0.02216	0.0359167	0.0290384	0.0243106	0.0396294	0.0320013	0.0237861	0.0367596	0.0299533	0.0182764	0.0328892	0.0252077	0.0109611	0.026112	0.0180664		0.110197	0.0960146	0.103106	0.132479	0.0795447	0.106012	0.147511	0.0920016	0.119756	0.138913	0.0855119	0.112212
0.964221	25_Pyridine-Pyridine_pi-pi_0.90_dimer.out	0.205682	0.371854	0.0830859	0.794549	1.08237	0.143909	1.11118	0.730045	0.190569	1.16259	0.657983	0.252304	0.387996	0.137011	0.262503	1.2695	0.553884	0.357808	0.491794	0.252508	0.372151	0.286679	0.111383	0.188064	0.529849	0.285995	0.399306	0.335312	0.0580479	0.194283	0.424835	0.143635	0.282362		1.1699	0.592368	0.881136	1.75877	-0.118146	0.820312	2.0754	0.234176	1.15479	2.12681	0.306238	1.21653
2.89122	25_Pyridine-Pyridine_pi-pi_0.95_dimer.out	0.189005	0.293073	0.0520338	0.763048	0.784672	0.0108121	0.995652	0.521213	0.23722	1.02684	0.474904	0.275969	0.339861	0.143496	0.241678	1.11195	0.389483	0.361236	0.416113	0.229863	0.322988	0.224105	0.114127	0.156497	0.462767	0.2711	0.356355	0.307897	0.0927534	0.198859	0.375488	0.159899	0.26663		3.08023	2.59815	2.83919	3.65427	2.10655	2.88041	3.88688	2.37001	3.12844	3.91807	2.41632	3.16719
3.61049	25_Pyridine-Pyridine_pi-pi_1.00_dimer.out	0.212018	0.187815	0.0121014	0.732793	0.558395	0.0871989	0.897246	0.366956	0.265145	0.913311	0.335193	0.289059	0.237241	0.0703642	0.153803	0.979473	0.271237	0.354118	0.291152	0.133121	0.212136	0.125129	0.0418262	0.0711625	0.337833	0.174509	0.245576	0.220777	0.0355589	0.127376	0.270227	0.0851319	0.177355		3.8225	3.42267	3.62259	4.34328	3.05209	3.69768	4.50773	3.24353	3.87563	4.5238	3.27529	3.89954
3.68858	25_Pyridine-Pyridine_pi-pi_1.05_dimer.out	0.235373	0.0987378	0.0683178	0.702623	0.375844	0.16339	0.819569	0.243646	0.287961	0.797415	0.249106	0.274154	0.147645	0.00373097	0.075688	0.878042	0.177547	0.350247	0.185982	0.0470678	0.116525	0.0604649	0.019005	0.0106085	0.222551	0.0804553	0.143124	0.170348	0.00971421	0.0909453	0.214837	0.0553174	0.136606		3.92395	3.58984	3.7569	4.3912	3.31273	3.85197	4.50815	3.44493	3.97654	4.48599	3.43947	3.96273
3.45182	25_Pyridine-Pyridine_pi-pi_1.10_dimer.out	0.250458	0.026665	0.111896	0.673136	0.230479	0.221329	0.760909	0.132042	0.314434	0.693073	0.184208	0.254433	0.0842118	0.0424237	0.020894	0.804796	0.0828234	0.360986	0.112985	0.0101544	0.0514154	0.019262	0.0596803	0.0280681	0.140214	0.0152254	0.0714374	0.15373	0.0147373	0.0871976	0.201341	0.0686588	0.138682		3.70227	3.42515	3.56371	4.12495	3.22134	3.67314	4.21272	3.31977	3.76625	4.14489	3.26761	3.70625
2.29922	25_Pyridine-Pyridine_pi-pi_1.25_dimer.out	0.252175	0.0921096	0.172142	0.572412	0.0318715	0.302142	0.626449	0.0935198	0.359984	0.438899	0.0806081	0.179146	0.00678783	0.0911851	0.0489864	0.653468	0.124344	0.388906	0.0109265	0.0709757	0.0300246	0.0212551	0.0959687	0.0613034	0.0161435	0.0646411	0.0255741	0.185413	0.0996176	0.150848	0.255207	0.192101	0.23299		2.55139	2.39133	2.47136	2.87163	2.33109	2.60136	2.92567	2.39274	2.6592	2.73812	2.21861	2.47836
0.945317	25_Pyridine-Pyridine_pi-pi_1.50_dimer.out	0.266348	0.196121	0.231235	0.345701	0.129308	0.237504	0.391034	0.178994	0.285014	0.182998	0.01995	0.0815238	0.1846	0.20735	0.195975	0.4137	0.203837	0.308769	0.169739	0.191062	0.180401	0.172346	0.205257	0.188483	0.176398	0.195397	0.184516	0.0285955	0.0106451	0.0288901	0.101224	0.109508	0.115558		1.21166	1.14144	1.17655	1.29102	1.07462	1.18282	1.33635	1.12431	1.23033	1.12831	0.925367	1.02684
0.233435	25_Pyridine-Pyridine_pi-pi_2.00_dimer.out	0.0587099	0.0429562	0.050833	0.0808951	0.0231862	0.0520407	0.0945019	0.0399157	0.0672088	0.0725656	0.0226602	0.0476129	0.0352434	0.0449496	0.0400965	0.101305	0.0482804	0.0747928	0.0307829	0.0394654	0.0351242	0.0325431	0.0444666	0.0384128	0.0323392	0.0405733	0.0361255	0.012763	0.0260418	0.0184423	0.00221119	0.0133955	0.00662367		0.292145	0.276391	0.284268	0.31433	0.256621	0.285476	0.327937	0.273351	0.300644	0.306001	0.256095	0.281048
7.5928	26_Uracil-Uracil_pi-pi_0.90_dimer.out	0.227876	0.850855	0.311489	0.90153	2.11722	0.607843	1.63774	1.37249	0.132624	1.84428	1.13367	0.355304	0.69648	0.50885	0.602665	2.00585	1.00013	0.502857	0.937822	0.752983	0.845403	0.598462	0.482787	0.528744	0.964068	0.779155	0.865415	0.484817	0.247159	0.356593	0.668807	0.392166	0.521533		7.82067	6.74194	7.28131	8.49433	5.47558	6.98495	9.23054	6.2203	7.72542	9.43708	6.45912	7.9481
9.26565	26_Uracil-Uracil_pi-pi_0.95_dimer.out	0.331488	0.598331	0.133422	0.985828	1.6075	0.310838	1.59946	0.996944	0.301258	1.71072	0.849594	0.430561	0.499838	0.336987	0.418413	1.90628	0.691664	0.607306	0.700998	0.537139	0.619068	0.43073	0.317061	0.363966	0.717177	0.55631	0.632673	0.385823	0.175527	0.275527	0.556089	0.314519	0.431008		9.59714	8.66732	9.13223	10.2515	7.65814	8.95481	10.8651	8.2687	9.56691	10.9764	8.41605	9.69621
9.61943	26_Uracil-Uracil_pi-pi_1.00_dimer.out	0.338976	0.463162	0.0620929	0.963351	1.2673	0.151975	1.46491	0.77114	0.346883	1.552	0.653872	0.449062	0.399222	0.261241	0.330231	1.71568	0.523058	0.596312	0.56364	0.423891	0.493766	0.337765	0.243194	0.281324	0.579114	0.442411	0.506854	0.309971	0.132744	0.217319	0.450206	0.246721	0.345155		9.95841	9.15627	9.55734	10.5828	8.35213	9.46746	11.0843	8.84829	9.96631	11.1714	8.96556	10.0685
9.25628	26_Uracil-Uracil_pi-pi_1.05_dimer.out	0.329095	0.362674	0.0167898	0.955919	0.972792	0.00843664	1.35731	0.575486	0.390912	1.39645	0.509755	0.443349	0.345039	0.223148	0.284093	1.55801	0.376833	0.590587	0.476622	0.353391	0.415007	0.299245	0.208662	0.246091	0.487471	0.368277	0.424977	0.304925	0.151122	0.226148	0.425639	0.254083	0.338741		9.58537	8.8936	9.23949	10.2122	8.28349	9.24784	10.6136	8.68079	9.64719	10.6527	8.74652	9.69963
8.54106	26_Uracil-Uracil_pi-pi_1.10_dimer.out	0.326052	0.269427	0.0283125	0.923856	0.7532	0.0853278	1.24179	0.433974	0.403908	1.22903	0.427853	0.400588	0.274339	0.161543	0.217941	1.40076	0.274361	0.563199	0.378563	0.266191	0.322377	0.258738	0.154397	0.201675	0.377804	0.271021	0.32413	0.287417	0.154837	0.221611	0.395186	0.256944	0.327207		8.86711	8.27163	8.56937	9.46492	7.78786	8.62639	9.78285	8.10709	8.94497	9.77009	8.11321	8.94165
5.99344	26_Uracil-Uracil_pi-pi_1.25_dimer.out	0.401635	0.0261579	0.213896	0.867741	0.244721	0.31151	1.08175	0.0187609	0.531493	0.822813	0.25519	0.283811	0.0442708	0.0556082	0.00566868	1.18875	0.0942193	0.641485	0.114426	0.0184655	0.0664457	0.0738473	0.0518093	0.0105338	0.0957814	0.00782701	0.0555492	0.309628	0.203461	0.26803	0.451684	0.375668	0.426677		6.39507	6.0196	6.20733	6.86118	5.74872	6.30495	7.07519	5.97468	6.52493	6.81625	5.73825	6.27725
3.07071	26_Uracil-Uracil_pi-pi_1.50_dimer.out	0.336938	0.153526	0.245232	0.536809	0.0204626	0.258173	0.656915	0.125562	0.391239	0.377002	0.152207	0.112397	0.127151	0.17186	0.149505	0.716967	0.198575	0.457771	0.0877779	0.123991	0.105884	0.0954942	0.166754	0.130602	0.105054	0.135074	0.116493	0.159704	0.132509	0.158626	0.276804	0.295671	0.299666		3.40765	3.22424	3.31594	3.60752	3.05025	3.32888	3.72762	3.19627	3.46195	3.44771	2.9185	3.18311
0.986244	26_Uracil-Uracil_pi-pi_2.00_dimer.out	0.0754871	0.0276711	0.0515791	0.139851	0.0321775	0.0538369	0.161361	0.0213786	0.0913696	0.124223	0.0114425	0.0563905	0.0191856	0.0317967	0.0254911	0.172115	0.0481567	0.110136	0.0121345	0.01424	0.0131873	0.0115399	0.0307058	0.0211394	0.0161228	0.0170638	0.0157469	0.0188726	0.00416743	0.0131623	0.036236	0.0353469	0.0376868		1.06173	1.01392	1.03782	1.1261	0.954067	1.04008	1.1476	1.00762	1.07761	1.11047	0.974802	1.04263
0.362257	27_Benzene-Pyridine_pi-pi_0.90_dimer.out	0.220048	0.362955	0.0714533	0.860463	1.02987	0.0847045	1.19168	0.689802	0.250938	1.23201	0.619611	0.306197	0.416986	0.148662	0.282824	1.35728	0.519767	0.418759	0.525563	0.260143	0.392853	0.306775	0.120085	0.2008	0.567284	0.298561	0.423336	0.375657	0.0717497	0.22176	0.473036	0.154097	0.312483		0.582305	-0.000697396	0.290804	1.22272	-0.667615	0.277553	1.55394	-0.327545	0.613195	1.59426	-0.257354	0.668455
2.41302	27_Benzene-Pyridine_pi-pi_0.95_dimer.out	0.211021	0.267941	0.0284603	0.815853	0.728355	0.043749	1.05599	0.486591	0.2847	1.08695	0.427902	0.329525	0.342971	0.124587	0.233779	1.17606	0.365708	0.405176	0.421693	0.203842	0.312767	0.231941	0.0958853	0.151277	0.466024	0.244463	0.345073	0.311243	0.0602786	0.184246	0.381367	0.115174	0.247574		2.62404	2.14508	2.38456	3.22887	1.68466	2.45677	3.46901	1.92643	2.69772	3.49997	1.98512	2.74254
3.15603	27_Benzene-Pyridine_pi-pi_1.00_dimer.out	0.219429	0.176542	0.0214435	0.772949	0.510766	0.131092	0.949022	0.327388	0.310817	0.952351	0.297989	0.327181	0.258917	0.0776429	0.16828	1.03706	0.235698	0.40068	0.316637	0.137758	0.227197	0.153929	0.0504439	0.090179	0.359809	0.177184	0.258603	0.255506	0.0454296	0.150198	0.312302	0.0933421	0.203398		3.37546	2.97949	3.17748	3.92898	2.64527	3.28713	4.10506	2.82865	3.46685	4.10838	2.85804	3.48321
3.23443	27_Benzene-Pyridine_pi-pi_1.05_dimer.out	0.245163	0.081132	0.0820155	0.754031	0.315866	0.219082	0.884759	0.184667	0.350046	0.82322	0.219454	0.301883	0.174178	0.013251	0.0937146	0.950124	0.119067	0.415528	0.217033	0.0562603	0.136647	0.0943093	0.00781391	0.0337392	0.249956	0.087016	0.160884	0.237244	0.0513691	0.146937	0.297188	0.108817	0.206696		3.47959	3.1533	3.31644	3.98846	2.91856	3.45351	4.11919	3.04976	3.58448	4.05765	3.01498	3.53631
3.00145	27_Benzene-Pyridine_pi-pi_1.10_dimer.out	0.261239	0.0104217	0.125409	0.720164	0.173972	0.273096	0.819541	0.0729264	0.373307	0.712765	0.158771	0.276997	0.104803	0.0305586	0.0371221	0.86923	0.0224034	0.423413	0.13738	0.00256605	0.0699732	0.0456798	0.0464085	0.00765995	0.161687	0.0256602	0.0880295	0.214227	0.0635068	0.143549	0.276455	0.132262	0.210049		3.26269	2.99103	3.12686	3.72161	2.82748	3.27454	3.82099	2.92852	3.37476	3.71421	2.84268	3.27845
1.91291	27_Benzene-Pyridine_pi-pi_1.25_dimer.out	0.302941	0.147364	0.225153	0.570488	0.0376275	0.304058	0.630522	0.10076	0.365641	0.452435	0.0586394	0.196898	0.0881679	0.177919	0.133044	0.660539	0.132327	0.396433	0.0684876	0.157223	0.112855	0.0964776	0.181374	0.14118	0.066204	0.153028	0.110314	0.094336	0.00325537	0.053425	0.163468	0.0836018	0.132567		2.21585	2.06027	2.13806	2.48339	1.95053	2.21696	2.54343	2.01367	2.27855	2.36534	1.85427	2.1098
0.705302	27_Benzene-Pyridine_pi-pi_1.50_dimer.out	0.274249	0.20639	0.24032	0.357409	0.152473	0.254941	0.406365	0.198208	0.302286	0.182689	0.0134139	0.0846378	0.18763	0.211755	0.199692	0.430843	0.221075	0.325959	0.171581	0.196762	0.184172	0.171874	0.20895	0.189888	0.179913	0.202147	0.189304	0.0415936	0.0201315	0.0408186	0.119753	0.122961	0.132379		0.979551	0.911692	0.945621	1.06271	0.857774	0.960242	1.11167	0.903509	1.00759	0.887991	0.691888	0.789939
0.143097	27_Benzene-Pyridine_pi-pi_2.00_dimer.out	0.0524163	0.0362419	0.0443291	0.0687851	0.0154454	0.0421152	0.088616	0.0343602	0.0614881	0.0746663	0.0245466	0.0496065	0.0286825	0.0374755	0.033079	0.0985315	0.0438177	0.0711746	0.0221815	0.0312749	0.0267282	0.0259997	0.0370523	0.0314913	0.023883	0.0323324	0.0277588	0.0143868	0.0267222	0.0199493	0.00401231	0.0164483	0.0094474		0.195514	0.179339	0.187426	0.211882	0.158543	0.185213	0.231713	0.177458	0.204585	0.217764	0.167644	0.192704
3.17801	28_Benzene-Uracil_pi-pi_0.90_dimer.out	0.257354	0.564773	0.15371	1.0241	1.47048	0.223191	1.57888	0.928835	0.325021	1.65277	0.822465	0.415153	0.609083	0.326082	0.467583	1.85627	0.658012	0.599128	0.790949	0.503643	0.647296	0.504614	0.298009	0.388354	0.824575	0.537148	0.672925	0.533357	0.209525	0.367983	0.694704	0.342936	0.516207		3.43536	2.61323	3.0243	4.20211	1.70752	2.95481	4.75688	2.24917	3.50303	4.83078	2.35554	3.59316
4.92446	28_Benzene-Uracil_pi-pi_0.95_dimer.out	0.27733	0.416986	0.069828	0.974189	1.13125	0.0785289	1.4325	0.680419	0.376041	1.5032	0.590728	0.456235	0.48004	0.24427	0.362155	1.66166	0.455005	0.603326	0.630283	0.392059	0.511171	0.37241	0.215684	0.281034	0.667711	0.428231	0.539229	0.407589	0.14599	0.273537	0.5382	0.256551	0.394535		5.20178	4.50747	4.85463	5.89864	3.79321	4.84593	6.35696	4.24404	5.3005	6.42765	4.33373	5.38069
5.46473	28_Benzene-Uracil_pi-pi_1.00_dimer.out	0.287851	0.305852	0.00900068	0.956154	0.835893	0.0601307	1.31504	0.483062	0.415991	1.33598	0.441194	0.447394	0.385612	0.189668	0.28764	1.49449	0.306647	0.593921	0.503262	0.305331	0.404297	0.289201	0.163854	0.214664	0.538059	0.339102	0.430442	0.364156	0.14379	0.252938	0.475992	0.242075	0.358624		5.75259	5.15888	5.45573	6.42089	4.62884	5.52487	6.77978	4.98167	5.88073	6.80072	5.02354	5.91213
5.35136	28_Benzene-Uracil_pi-pi_1.05_dimer.out	0.293713	0.213794	0.0399593	0.920442	0.605453	0.157495	1.19379	0.331434	0.431177	1.18991	0.33102	0.429445	0.296408	0.136665	0.216537	1.33046	0.194425	0.568019	0.386016	0.226493	0.306255	0.219607	0.115865	0.158047	0.414043	0.253916	0.327406	0.300384	0.136211	0.218451	0.391069	0.225867	0.308775		5.64507	5.13756	5.39131	6.2718	4.7459	5.50885	6.54514	5.01992	5.78253	6.54126	5.02034	5.7808
4.91567	28_Benzene-Uracil_pi-pi_1.10_dimer.out	0.301729	0.130643	0.0855433	0.865168	0.437738	0.213715	1.0789	0.227352	0.425773	1.04877	0.25355	0.397609	0.20781	0.0672364	0.137523	1.18576	0.122159	0.531803	0.277875	0.136205	0.20704	0.150751	0.0511833	0.0931688	0.298436	0.157391	0.223002	0.238689	0.0959427	0.168646	0.317121	0.175785	0.248003		5.2174	4.78503	5.00122	5.78084	4.47794	5.12939	5.99457	4.68832	5.34145	5.96444	4.66212	5.31328
3.20726	28_Benzene-Uracil_pi-pi_1.25_dimer.out	0.35399	0.0942706	0.22413	0.766966	0.0608576	0.353054	0.883518	0.0531442	0.468331	0.700762	0.12136	0.289701	0.0068132	0.121235	0.0640239	0.941794	0.110145	0.525969	0.0313945	0.0838628	0.0262342	0.00798286	0.123565	0.0679377	0.0290577	0.0824895	0.0264701	0.180475	0.0699808	0.13337	0.269431	0.179783	0.233568		3.56125	3.30153	3.43139	3.97423	3.14641	3.56032	4.09078	3.26041	3.67559	3.90803	3.0859	3.49696
1.33389	28_Benzene-Uracil_pi-pi_1.50_dimer.out	0.339836	0.222236	0.281036	0.509431	0.127904	0.318667	0.586832	0.203849	0.39534	0.323162	0.0521404	0.135511	0.177897	0.234291	0.206094	0.625532	0.241821	0.433677	0.152524	0.209395	0.180959	0.153871	0.230349	0.191648	0.165297	0.2172	0.18864	0.0923122	0.0462119	0.0810286	0.190902	0.17736	0.19694		1.67373	1.55613	1.61493	1.84332	1.4618	1.65256	1.92072	1.53774	1.72923	1.65705	1.28175	1.4694
0.245855	28_Benzene-Uracil_pi-pi_2.00_dimer.out	0.0715321	0.047479	0.0595056	0.0982989	0.0200327	0.0591658	0.128228	0.0464902	0.0873591	0.113429	0.01883	0.0661297	0.0343604	0.0481274	0.0412439	0.143193	0.059719	0.101456	0.0245491	0.0394541	0.0320016	0.0287154	0.0473174	0.038024	0.0278392	0.0412794	0.0339027	0.0191947	0.0178184	0.0177845	0.00527413	0.00233558	0.00112528		0.317388	0.293334	0.305361	0.344154	0.265888	0.305021	0.374083	0.292346	0.333215	0.359285	0.264685	0.311985
3.37441	29_Pyridine-Uracil_pi-pi_0.90_dimer.out	0.212704	0.645204	0.21625	0.89331	1.70121	0.403949	1.48007	1.10236	0.188859	1.58338	0.954244	0.314569	0.618226	0.34548	0.481853	1.77345	0.80293	0.485262	0.810577	0.541793	0.676185	0.515522	0.318456	0.404826	0.842617	0.572466	0.700082	0.512355	0.183185	0.342938	0.676019	0.318023	0.493351		3.58712	2.72921	3.15816	4.26772	1.6732	2.97046	4.85448	2.27206	3.56327	4.95779	2.42017	3.68898
5.87827	29_Pyridine-Uracil_pi-pi_0.95_dimer.out	0.25081	0.459996	0.104593	0.879386	1.25324	0.186929	1.35727	0.764762	0.296257	1.43155	0.648961	0.391295	0.474627	0.260181	0.367404	1.59622	0.52052	0.53785	0.631287	0.420314	0.5258	0.376169	0.234255	0.293533	0.664083	0.451496	0.550172	0.398509	0.13329	0.262382	0.534544	0.245359	0.387576		6.12908	5.41827	5.77368	6.75766	4.62503	5.69134	7.23554	5.11351	6.17453	7.30982	5.22931	6.26956
6.5763	29_Pyridine-Uracil_pi-pi_1.00_dimer.out	0.268868	0.321618	0.026375	0.842558	0.929649	0.0435457	1.20538	0.554365	0.32551	1.25393	0.467369	0.393282	0.345145	0.169021	0.257083	1.3868	0.366723	0.510037	0.464085	0.292045	0.378065	0.249132	0.143831	0.185184	0.498605	0.324369	0.40351	0.295392	0.0736942	0.182191	0.400851	0.16061	0.279496		6.84516	6.25468	6.54992	7.41885	5.64665	6.53275	7.78168	6.02193	6.90181	7.83023	6.10893	6.96958
6.39132	29_Pyridine-Uracil_pi-pi_1.05_dimer.out	0.254329	0.233873	0.0102279	0.837994	0.641373	0.0983103	1.09095	0.374533	0.358207	1.08874	0.348478	0.37013	0.294187	0.141651	0.217919	1.21742	0.241113	0.488155	0.377109	0.229126	0.303117	0.222709	0.122213	0.163365	0.403229	0.254533	0.322767	0.296449	0.113101	0.204743	0.379984	0.189762	0.285775		6.64565	6.15745	6.40155	7.22932	5.74995	6.48963	7.48227	6.01679	6.74953	7.48006	6.04284	6.76145
5.82038	29_Pyridine-Uracil_pi-pi_1.10_dimer.out	0.250572	0.156863	0.0468546	0.789561	0.461798	0.163881	1.00432	0.231367	0.386476	0.950069	0.262607	0.343731	0.243611	0.108015	0.175813	1.1117	0.116152	0.497773	0.314012	0.183554	0.248783	0.20056	0.0954844	0.141719	0.32821	0.198741	0.260038	0.299205	0.142246	0.223047	0.384671	0.230752	0.310951		6.07095	5.66352	5.86723	6.60994	5.35858	5.98426	6.8247	5.58901	6.20685	6.77045	5.55777	6.16411
3.79308	29_Pyridine-Uracil_pi-pi_1.25_dimer.out	0.353046	0.115349	0.234197	0.696773	0.0592294	0.318772	0.812269	0.0687833	0.440526	0.60698	0.132481	0.23725	0.0519637	0.145878	0.0989211	0.870017	0.13279	0.501403	0.0141021	0.103914	0.0590079	0.0380591	0.14446	0.0918555	0.0232333	0.108776	0.0641994	0.158416	0.0746591	0.125708	0.253283	0.200161	0.23664		4.14613	3.90843	4.02728	4.48985	3.73385	4.11185	4.60535	3.86186	4.23361	4.40006	3.6606	4.03033
1.75215	29_Pyridine-Uracil_pi-pi_1.50_dimer.out	0.289118	0.184679	0.236899	0.445343	0.12386	0.284601	0.50669	0.190165	0.348427	0.261589	0.0492526	0.106168	0.14647	0.181083	0.163777	0.537363	0.223317	0.38034	0.12636	0.159347	0.142853	0.123873	0.177011	0.149642	0.138092	0.167161	0.150178	0.10471	0.0812615	0.10393	0.19288	0.202371	0.209492		2.04126	1.93683	1.98905	2.19749	1.87601	2.03675	2.25884	1.94231	2.10057	2.01374	1.70289	1.85831
0.528589	29_Pyridine-Uracil_pi-pi_2.00_dimer.out	0.0455765	0.0243307	0.0349536	0.0935538	0.00701556	0.0502847	0.112279	0.0240389	0.0681589	0.0999049	0.0192158	0.0595604	0.00184416	0.024522	0.0131831	0.121641	0.0325505	0.077096	0.00429426	0.0189415	0.0073236	0.00221987	0.0239081	0.0108188	0.00199501	0.020263	0.00867135	0.0108368	0.0192371	0.00368133	0.0204112	0.0116547	0.00518223		0.574165	0.55292	0.563542	0.622143	0.535604	0.578874	0.640868	0.552628	0.596748	0.628494	0.547805	0.588149
0.021002	30_Benzene-Ethene_0.90_dimer.out	0.119295	0.183364	0.0320341	0.397568	0.540346	0.0713888	0.533448	0.398954	0.0672466	0.571839	0.342564	0.114637	0.152237	0.0420149	0.0971259	0.601387	0.328259	0.136564	0.19678	0.0883655	0.142573	0.115169	0.0325847	0.0698104	0.210211	0.100448	0.152267	0.112894	0.0197756	0.0447571	0.146777	0.00316926	0.0736473		0.140297	-0.162362	-0.0110321	0.41857	-0.519344	-0.0503868	0.55445	-0.377952	0.0882486	0.592841	-0.321562	0.135639
0.939473	30_Benzene-Ethene_0.95_dimer.out	0.115011	0.136919	0.010954	0.38324	0.395506	0.00613303	0.480702	0.282745	0.0989782	0.517642	0.238429	0.139607	0.124749	0.0413098	0.0830293	0.529432	0.226365	0.151534	0.156698	0.0782748	0.117487	0.0720089	0.028286	0.0447557	0.178164	0.0966447	0.132587	0.0868916	0.00725052	0.0381328	0.108583	0.0113203	0.0583955		1.05448	0.802554	0.928519	1.32271	0.543967	0.93334	1.42017	0.656728	1.03845	1.45712	0.701044	1.07908
1.26853	30_Benzene-Ethene_1.00_dimer.out	0.111309	0.0977874	0.00676089	0.370138	0.27833	0.0459043	0.439916	0.194596	0.12266	0.459645	0.16509	0.147278	0.104137	0.0343161	0.0692265	0.474805	0.15273	0.161038	0.127011	0.0617654	0.0943883	0.0475679	0.0204313	0.028301	0.15089	0.0820939	0.111142	0.0839186	0.00198433	0.042023	0.101315	0.0171866	0.0585842		1.37984	1.17074	1.27529	1.63866	0.990197	1.31443	1.70844	1.07393	1.39119	1.72817	1.10344	1.4158
1.29209	30_Benzene-Ethene_1.05_dimer.out	0.111134	0.060736	0.0251988	0.358293	0.183952	0.0871703	0.404248	0.125783	0.139233	0.401848	0.116567	0.142641	0.0810423	0.0180891	0.0495657	0.427226	0.0966982	0.165264	0.0961074	0.037158	0.0666327	0.0404132	0.00803177	0.0200446	0.11336	0.0519334	0.0787741	0.0835021	0.00799067	0.0457999	0.0992337	0.0232344	0.0616763		1.40323	1.23136	1.31729	1.65039	1.10814	1.37926	1.69634	1.16631	1.43133	1.69394	1.17553	1.43473
1.17227	30_Benzene-Ethene_1.10_dimer.out	0.105639	0.0347151	0.0354619	0.325301	0.122369	0.101466	0.357682	0.0808821	0.1384	0.342932	0.0828702	0.130031	0.0596093	0.00444633	0.0320278	0.373872	0.0601388	0.156867	0.0702243	0.0180464	0.0441353	0.0293262	0.00330187	0.00964596	0.0831298	0.0294973	0.0533837	0.0747256	0.00662474	0.0412762	0.0894365	0.02105	0.0563077		1.27791	1.13755	1.20773	1.49757	1.0499	1.27373	1.52995	1.09138	1.31067	1.5152	1.0894	1.3023
0.650899	30_Benzene-Ethene_1.25_dimer.out	0.115899	0.0367033	0.0763012	0.237721	0.00146634	0.119594	0.247826	0.0179818	0.132904	0.187287	0.0348115	0.0762379	0.0294032	0.0489777	0.0391904	0.252879	0.0262396	0.139559	0.0260907	0.0435636	0.0348272	0.0341907	0.0505682	0.0432777	0.024173	0.0413762	0.0332501	0.0326371	0.00887117	0.023428	0.0527602	0.0361979	0.0475888		0.766798	0.687602	0.7272	0.88862	0.652365	0.770493	0.898725	0.668881	0.783803	0.838186	0.616087	0.727137
0.159214	30_Benzene-Ethene_1.50_dimer.out	0.12513	0.098276	0.111703	0.164152	0.07231	0.118231	0.174841	0.0852846	0.130063	0.0814478	0.00802017	0.0367138	0.0925377	0.106794	0.0996657	0.180185	0.0917719	0.135978	0.0890339	0.10254	0.0957871	0.0851189	0.105372	0.094898	0.0926534	0.105061	0.0980927	0.00317142	0.00455395	0.0034887	0.0326088	0.0384268	0.0399806		0.284344	0.25749	0.270917	0.323366	0.231524	0.277445	0.334055	0.244499	0.289277	0.240662	0.151194	0.195928
-0.0132824	30_Benzene-Ethene_2.00_dimer.out	0.0258217	0.0208102	0.023316	0.0357959	0.011648	0.023722	0.0452222	0.0214012	0.0333117	0.0373385	0.0117037	0.0245211	0.0131022	0.0204228	0.0167625	0.0499353	0.0262778	0.0381065	0.0100121	0.0172256	0.0136188	0.0117376	0.020149	0.015867	0.0108613	0.0178591	0.0141773	0.00502299	0.00979671	0.00704855	0.000256234	0.00257439	0.000833728		0.0125393	0.00752782	0.0100336	0.0225135	-0.00163439	0.0104396	0.0319397	0.00811875	0.0200292	0.0240561	-0.00157871	0.0112387
2.39596	31_Uracil-Ethene_0.90_dimer.out	0.122083	0.278808	0.0783625	0.384492	0.733998	0.174753	0.5989	0.507019	0.0459407	0.67434	0.421778	0.126281	0.190535	0.129185	0.15986	0.706104	0.393529	0.156287	0.260822	0.203592	0.232207	0.151838	0.119299	0.131283	0.273059	0.214651	0.24106	0.113225	0.0357812	0.0710807	0.162563	0.0748085	0.115359		2.51805	2.11716	2.3176	2.78046	1.66197	2.22121	2.99486	1.88895	2.44191	3.0703	1.97419	2.52225
3.09153	31_Uracil-Ethene_0.95_dimer.out	0.115299	0.221338	0.0530192	0.366396	0.579536	0.10657	0.547854	0.386841	0.0805063	0.597353	0.329046	0.134153	0.168298	0.112828	0.140563	0.638582	0.290493	0.174044	0.227783	0.175997	0.20189	0.126173	0.102221	0.109686	0.24238	0.1889	0.21233	0.117571	0.0494989	0.0812807	0.163311	0.088679	0.123865		3.20683	2.87019	3.03851	3.45792	2.51199	2.98496	3.63938	2.70469	3.17203	3.68888	2.76248	3.22568
3.25698	31_Uracil-Ethene_1.00_dimer.out	0.114873	0.165257	0.0251923	0.34784	0.45114	0.0516501	0.490534	0.296514	0.0970097	0.543955	0.242344	0.150805	0.131424	0.0792005	0.105312	0.561881	0.219202	0.17134	0.178201	0.12989	0.154045	0.0991229	0.0710076	0.0815464	0.189307	0.139738	0.162002	0.0766781	0.0198431	0.045866	0.108622	0.048048	0.0758047		3.37185	3.09172	3.23178	3.60482	2.80584	3.20533	3.74751	2.96046	3.35399	3.80093	3.01463	3.40778
3.13698	31_Uracil-Ethene_1.05_dimer.out	0.114623	0.122421	0.0038991	0.33144	0.344653	0.00660624	0.450785	0.214228	0.118278	0.481107	0.186404	0.147351	0.105777	0.0622286	0.0840029	0.510458	0.149016	0.180721	0.144901	0.104984	0.124942	0.0772052	0.0549366	0.0629132	0.154894	0.113897	0.132123	0.0747038	0.0317398	0.0518762	0.105407	0.0629463	0.0826583		3.2516	3.01455	3.13308	3.46842	2.79232	3.13037	3.58776	2.92275	3.25525	3.61808	2.95057	3.28433
2.87826	31_Uracil-Ethene_1.10_dimer.out	0.1173	0.0850268	0.0161366	0.315681	0.257752	0.0289648	0.406532	0.159139	0.123696	0.426231	0.14045	0.14289	0.0723301	0.0364361	0.0543831	0.451957	0.109833	0.171062	0.102112	0.0687629	0.0854377	0.0510497	0.0308662	0.0384672	0.109507	0.0755913	0.0908483	0.0521424	0.0159572	0.0331727	0.0764546	0.0405268	0.0575214		2.99556	2.79323	2.8944	3.19394	2.62051	2.90723	3.28479	2.71912	3.00196	3.30449	2.73781	3.02115
1.94883	31_Uracil-Ethene_1.25_dimer.out	0.124382	0.000782695	0.0617998	0.285623	0.0736778	0.105973	0.325572	0.0290153	0.148278	0.281135	0.0737365	0.103699	0.00752429	0.0177276	0.00510163	0.345546	0.006684	0.169431	0.0206202	0.0030864	0.00876689	0.0120377	0.017412	0.0030257	0.0175957	0.00449823	0.00713033	0.0530636	0.0312763	0.0441603	0.078499	0.0644796	0.0736035		2.07322	1.94805	2.01063	2.23446	1.87516	2.05481	2.27441	1.91982	2.09711	2.22997	1.8751	2.05253
0.917883	31_Uracil-Ethene_1.50_dimer.out	0.12535	0.0655532	0.0954515	0.184262	0.0307038	0.107483	0.208842	0.0549127	0.131877	0.119531	0.0344744	0.0425286	0.0706092	0.0725295	0.0715693	0.221132	0.0670171	0.144075	0.0625514	0.0645934	0.0635724	0.0601637	0.0706672	0.0650656	0.0678819	0.0680427	0.0668579	0.0209166	0.0254174	0.027165	0.0537744	0.0704549	0.0663778		1.04323	0.983436	1.01333	1.10214	0.948587	1.02537	1.12673	0.972796	1.04976	1.03741	0.883409	0.960411
0.250618	31_Uracil-Ethene_2.00_dimer.out	0.0261085	0.01479	0.0204493	0.0435431	0.00602254	0.0247828	0.0564049	0.0170347	0.0367198	0.0412836	0.00325704	0.0222703	0.0062452	0.0133183	0.00978177	0.0628358	0.0225408	0.0426883	0.00202887	0.00970836	0.00586862	0.0037933	0.0129056	0.0082917	0.00345451	0.0105881	0.00672948	0.0092512	0.00177871	0.00618557	0.0176664	0.0111073	0.015147		0.276726	0.265408	0.271067	0.294161	0.25664	0.275401	0.307023	0.267653	0.287338	0.291901	0.253875	0.272888
2.58661	32_Uracil-Ethyne_0.90_dimer.out	0.116256	0.237063	0.0604035	0.368466	0.679134	0.155334	0.596339	0.451536	0.0724011	0.664924	0.38485	0.140037	0.198503	0.0964463	0.147475	0.710275	0.337737	0.186269	0.273204	0.171057	0.22213	0.162571	0.087337	0.121044	0.283858	0.180872	0.229916	0.128217	0.0233742	0.0727343	0.183872	0.0703056	0.12376		2.70287	2.34955	2.52621	2.95508	1.90748	2.43128	3.18295	2.13507	2.65901	3.25153	2.20176	2.72665
3.38713	32_Uracil-Ethyne_0.95_dimer.out	0.132522	0.15491	0.0111938	0.368752	0.511178	0.0712132	0.559986	0.326454	0.116766	0.620332	0.270158	0.175087	0.147737	0.0424395	0.0950884	0.655602	0.234092	0.210755	0.210427	0.102995	0.156711	0.110031	0.0328538	0.0673131	0.222785	0.11444	0.165768	0.085894	0.0192479	0.0306407	0.131827	0.0179413	0.0718876		3.51965	3.23222	3.37594	3.75588	2.87595	3.31592	3.94712	3.06068	3.5039	4.00746	3.11697	3.56222
3.58724	32_Uracil-Ethyne_1.00_dimer.out	0.125011	0.114694	0.00515829	0.341248	0.399693	0.0292228	0.507294	0.237851	0.134722	0.560208	0.199491	0.180359	0.125628	0.0339484	0.079788	0.590317	0.156929	0.216694	0.18006	0.0870032	0.133532	0.0873469	0.0243134	0.0517346	0.193298	0.0989934	0.14312	0.071401	0.00808469	0.0293572	0.111141	0.0290484	0.0671569		3.71225	3.47255	3.5924	3.92849	3.18755	3.55802	4.09454	3.34939	3.72196	4.14745	3.38775	3.7676
3.46393	32_Uracil-Ethyne_1.05_dimer.out	0.111955	0.0963111	0.00782213	0.331463	0.295336	0.0180637	0.451861	0.184265	0.133798	0.507342	0.14058	0.183381	0.110898	0.0386452	0.0747717	0.512059	0.12873	0.191665	0.150367	0.075056	0.112711	0.0801846	0.0306854	0.0519194	0.161303	0.0854232	0.120825	0.0540409	0.00922335	0.0199801	0.078103	0.00905533	0.0405967		3.57589	3.36762	3.47176	3.7954	3.1686	3.482	3.91579	3.27967	3.59773	3.97128	3.32335	3.64732
3.18288	32_Uracil-Ethyne_1.10_dimer.out	0.127208	0.0483888	0.0394095	0.322967	0.20609	0.0584384	0.420376	0.121906	0.149235	0.449576	0.100808	0.174384	0.0650036	0.000188539	0.0325961	0.469081	0.0798136	0.194634	0.096936	0.0277857	0.0623609	0.0437296	0.00547422	0.016543	0.104166	0.0350558	0.067899	0.0350802	0.0229292	0.00480611	0.0589045	0.00408881	0.0257848		3.31009	3.13449	3.22229	3.50585	2.97679	3.24132	3.60326	3.06098	3.33212	3.63246	3.08207	3.35727
2.15864	32_Uracil-Ethyne_1.25_dimer.out	0.114843	0.00403919	0.0594411	0.266624	0.0495018	0.108561	0.31158	0.0191158	0.146232	0.304303	0.0372086	0.133547	0.0141442	0.0192204	0.0025381	0.334057	0.00392277	0.165067	0.0288813	0.00925932	0.00981099	0.0103606	0.0207839	0.0062284	0.0294878	0.00739767	0.010798	0.0216018	0.000605059	0.0114793	0.0383596	0.0180758	0.0282602		2.27348	2.16268	2.21808	2.42526	2.10914	2.2672	2.47022	2.13952	2.30487	2.46294	2.12143	2.29219
1.01222	32_Uracil-Ethyne_1.50_dimer.out	0.131587	0.0788527	0.10522	0.197209	0.0608771	0.129043	0.220347	0.0823983	0.151372	0.141135	0.0131494	0.063993	0.0733931	0.0765281	0.0749606	0.231915	0.0931589	0.162537	0.0658083	0.0694731	0.0676407	0.0639084	0.0748639	0.0690952	0.0706687	0.0725535	0.0706095	0.00778262	0.0281694	0.0215974	0.037363	0.0748829	0.0594452		1.14381	1.09108	1.11744	1.20943	1.0731	1.14127	1.23257	1.09462	1.1636	1.15336	0.999075	1.07622
0.264394	32_Uracil-Ethyne_2.00_dimer.out	0.0380559	0.0245985	0.0313272	0.0502541	0.00834743	0.0293007	0.0642696	0.022171	0.0432203	0.0459188	0.00479571	0.0253573	0.0208692	0.0261901	0.0235297	0.0712774	0.0290828	0.0501801	0.0162747	0.0216585	0.0189666	0.0184069	0.0257462	0.0219891	0.0177334	0.0226451	0.0198835	0.0020633	0.00715089	0.00379022	0.00762691	0.00459261	0.00701369		0.30245	0.288993	0.295721	0.314648	0.272742	0.293695	0.328664	0.286565	0.307615	0.310313	0.26919	0.289751
0.667746	33_Pyridine-Ethene_0.90_dimer.out	0.111752	0.188396	0.038322	0.39206	0.552107	0.0800238	0.514394	0.40163	0.0563817	0.561771	0.340985	0.110393	0.152234	0.0485923	0.100413	0.575561	0.326392	0.124584	0.192337	0.0979213	0.145129	0.113403	0.0390834	0.0723534	0.206898	0.109943	0.155189	0.103682	0.0178607	0.0407283	0.130629	0.00629649	0.0665744		0.779498	0.47935	0.629424	1.05981	0.115639	0.587723	1.18214	0.266116	0.724128	1.22952	0.326761	0.778139
1.447	33_Pyridine-Ethene_0.95_dimer.out	0.109452	0.140014	0.0152811	0.382379	0.406678	0.0121497	0.468433	0.294998	0.0867175	0.502888	0.248333	0.127277	0.125909	0.038401	0.0821549	0.511461	0.239158	0.136151	0.154119	0.0750116	0.114565	0.0729346	0.0255604	0.0440731	0.175971	0.0931127	0.129688	0.0906003	0.0127332	0.0373347	0.109243	0.00450822	0.0555746		1.55645	1.30699	1.43172	1.82938	1.04032	1.43485	1.91544	1.152	1.53372	1.94989	1.19867	1.57428
1.72072	33_Pyridine-Ethene_1.00_dimer.out	0.105025	0.104335	0.000345105	0.362199	0.297536	0.0323311	0.424469	0.213248	0.105611	0.451873	0.178598	0.136637	0.104413	0.0329276	0.0686705	0.455604	0.171104	0.14225	0.124827	0.0605588	0.0926928	0.0516203	0.0202388	0.0308809	0.147182	0.0789778	0.108122	0.0763302	0.00504033	0.0343847	0.089134	0.00820897	0.0475671		1.82575	1.61639	1.72107	2.08292	1.42318	1.75305	2.14519	1.50747	1.82633	2.17259	1.54212	1.85736
1.71932	33_Pyridine-Ethene_1.05_dimer.out	0.0934206	0.0836126	0.00490402	0.330791	0.222928	0.0539316	0.373808	0.162608	0.1056	0.39551	0.133716	0.130897	0.0904107	0.0318205	0.0611156	0.395316	0.132448	0.131434	0.104512	0.0515943	0.0780533	0.0459606	0.0210864	0.0292221	0.123566	0.0673998	0.0912483	0.0681701	0.000161309	0.0331609	0.0762454	0.00794293	0.0412605		1.81274	1.63571	1.72423	2.05011	1.49639	1.77325	2.09313	1.55671	1.82492	2.11483	1.58561	1.85022
1.58095	33_Pyridine-Ethene_1.10_dimer.out	0.111249	0.0368404	0.0372043	0.328322	0.1341	0.0971107	0.361256	0.0871566	0.13705	0.345271	0.093197	0.126037	0.0526641	0.0038514	0.0282577	0.377723	0.0636847	0.157019	0.0634604	0.0192404	0.0413504	0.021112	0.00401074	0.00525435	0.0769265	0.0307608	0.0508219	0.0690455	0.0104702	0.0404272	0.0842807	0.0283664	0.0573674		1.6922	1.54411	1.61816	1.90928	1.44685	1.67806	1.94221	1.4938	1.718	1.92622	1.48776	1.70699
0.984842	33_Pyridine-Ethene_1.25_dimer.out	0.11593	0.0300125	0.0729713	0.254872	0.0106109	0.12213	0.265307	0.00668128	0.135994	0.212753	0.0372676	0.0877427	0.0179936	0.0453092	0.0316514	0.270525	0.0153274	0.142926	0.0145727	0.0396406	0.0271066	0.0244523	0.0472498	0.0368574	0.011907	0.0369134	0.0250453	0.0358638	0.00284824	0.0216685	0.053878	0.0267585	0.0430709		1.10077	1.01485	1.05781	1.23971	0.974231	1.10697	1.25015	0.991523	1.12084	1.19759	0.947574	1.07258
0.350189	33_Pyridine-Ethene_1.50_dimer.out	0.127194	0.0925939	0.109894	0.192728	0.0802353	0.136482	0.197308	0.0865871	0.141948	0.0951733	0.0132457	0.0409638	0.0812243	0.0965321	0.0888782	0.199598	0.089763	0.144681	0.0797229	0.0944499	0.0870864	0.0748591	0.0952982	0.0847661	0.0827155	0.0965379	0.0889942	0.0234439	0.0128608	0.0227134	0.0533064	0.0563801	0.059786		0.477382	0.442782	0.460082	0.542917	0.430424	0.48667	0.547497	0.436776	0.492136	0.445362	0.336943	0.391152
0.0416423	33_Pyridine-Ethene_2.00_dimer.out	0.0350774	0.0251988	0.0301381	0.0416011	0.0164097	0.0290054	0.0520468	0.02798	0.0400134	0.037408	0.0102087	0.0238083	0.0239517	0.0233754	0.0236635	0.0572696	0.0337651	0.0455174	0.0205274	0.0195825	0.0200549	0.0225898	0.0229808	0.0225877	0.0214005	0.0204448	0.0207172	0.0089498	0.00390229	0.00575626	0.0014606	0.00726688	0.00351392		0.0767197	0.0668411	0.0717804	0.0832434	0.058052	0.0706477	0.0936891	0.0696223	0.0816557	0.0790503	0.051851	0.0654506
2.7964	34_Pentane-Pentane_0.90_dimer.out	0.0362333	0.348709	0.192471	0.0316372	0.976209	0.503923	0.221195	0.724311	0.251558	0.2617	0.663928	0.201114	0.205012	0.102451	0.153731	0.347612	0.598362	0.125375	0.287895	0.185027	0.236461	0.202516	0.0988985	0.147513	0.282808	0.185526	0.234908	0.163504	0.0362846	0.0979888	0.235139	0.0937979	0.163095		2.76016	2.44769	2.60393	2.76476	1.82019	2.29247	3.01759	2.07209	2.54484	3.0581	2.13247	2.59528
3.56378	34_Pentane-Pentane_0.95_dimer.out	0.012721	0.269629	0.141175	0.0126631	0.784349	0.385843	0.226819	0.555854	0.164517	0.244342	0.529773	0.142716	0.169772	0.0819707	0.125871	0.333898	0.441607	0.0538546	0.239976	0.156875	0.198426	0.175507	0.0801752	0.125212	0.232115	0.155064	0.194947	0.151814	0.0533924	0.101779	0.217153	0.117472	0.166717		3.55106	3.29415	3.4226	3.57644	2.77943	3.17794	3.7906	3.00792	3.39926	3.80812	3.03401	3.42106
3.72259	34_Pentane-Pentane_1.00_dimer.out	0.0202198	0.23391	0.127065	0.00720692	0.659222	0.326008	0.194093	0.462024	0.133965	0.228805	0.421072	0.0961336	0.160731	0.0843514	0.122541	0.287536	0.363425	0.0379443	0.221995	0.148996	0.185496	0.169213	0.0835756	0.124388	0.213562	0.146205	0.181411	0.125159	0.0394775	0.0807353	0.176784	0.0871246	0.130473		3.70237	3.48868	3.59553	3.7298	3.06337	3.39659	3.91669	3.26057	3.58863	3.9514	3.30152	3.62646
3.56736	34_Pentane-Pentane_1.05_dimer.out	0.0252543	0.202807	0.11403	0.00386283	0.542669	0.269403	0.158312	0.388346	0.115017	0.20304	0.341582	0.0692711	0.145607	0.0811609	0.113384	0.235537	0.311184	0.0378235	0.196238	0.131751	0.163994	0.15174	0.0796541	0.113299	0.189665	0.130994	0.161403	0.0997697	0.0299193	0.062833	0.137981	0.0610994	0.0974613		3.54211	3.36455	3.45333	3.57122	3.02469	3.29796	3.72567	3.17902	3.45234	3.7704	3.22578	3.49809
3.26495	34_Pentane-Pentane_1.10_dimer.out	0.0433019	0.108436	0.0325672	0.0890822	0.385269	0.148093	0.203274	0.260419	0.0285724	0.176586	0.284971	0.0541928	0.0615815	0.00879112	0.0351863	0.26037	0.197994	0.031188	0.0990156	0.0497189	0.0743673	0.0749693	0.00917611	0.040517	0.0901503	0.0465611	0.0699794	0.0889321	0.0356943	0.0634979	0.133777	0.0868128	0.11163		3.30825	3.15651	3.23238	3.35403	2.87968	3.11686	3.46822	3.00453	3.23638	3.44154	2.97998	3.21076
2.21088	34_Pentane-Pentane_1.25_dimer.out	0.128297	0.0399503	0.0841234	0.156691	0.113484	0.0216033	0.236323	0.0329843	0.101669	0.130819	0.154643	0.0119122	0.057471	0.0877687	0.0726199	0.276139	0.00726544	0.141702	0.0313662	0.0613796	0.0463729	0.033055	0.0838398	0.0580541	0.0443715	0.0692573	0.0541644	0.0506498	0.0455402	0.0528924	0.106051	0.122426	0.118821		2.33918	2.25083	2.295	2.36757	2.0974	2.23248	2.4472	2.1779	2.31255	2.3417	2.05624	2.19897
1.03869	34_Pentane-Pentane_1.50_dimer.out	0.102909	0.037994	0.0704513	0.10943	0.0178311	0.0457993	0.150784	0.0226277	0.0867059	0.0481983	0.0713572	0.0115795	0.0715199	0.0480686	0.0597943	0.171461	0.042857	0.107159	0.0579632	0.0348056	0.0463844	0.0540541	0.0453847	0.0495648	0.0668826	0.0398905	0.0515954	0.0336102	0.0549164	0.0488152	0.0756531	0.107189	0.0965631		1.1416	1.07668	1.10914	1.14812	1.02086	1.08449	1.18947	1.06132	1.12539	1.08689	0.967332	1.02711
0.262657	34_Pentane-Pentane_2.00_dimer.out	0.0288409	0.0150416	0.0219412	0.014012	0.00343775	0.0052871	0.0295748	0.012836	0.0212054	0.0275776	0.007151	0.0173643	0.0283597	0.0164876	0.0224237	0.0373563	0.0209728	0.0291645	0.0232579	0.0111528	0.0172054	0.0236657	0.0159889	0.0200085	0.0257644	0.0122764	0.0185423	0.0263129	0.0102583	0.0181791	0.0206565	0.00256387	0.0116188		0.291497	0.277698	0.284598	0.276669	0.259219	0.267944	0.292231	0.275493	0.283862	0.290234	0.269808	0.280021
1.82214	35_Neopentane-Pentane_0.90_dimer.out	0.0335884	0.253085	0.143337	0.00769919	0.71034	0.35132	0.18568	0.527998	0.171159	0.172525	0.520359	0.173917	0.177348	0.0728427	0.125095	0.27467	0.436827	0.0810786	0.235693	0.132618	0.184155	0.205876	0.0763785	0.140531	0.218409	0.123286	0.174276	0.190829	0.0644716	0.128143	0.252827	0.121076	0.188166		1.78855	1.56906	1.6788	1.82984	1.1118	1.47082	2.00782	1.29414	1.65098	1.99467	1.30178	1.64822
2.46012	35_Neopentane-Pentane_0.95_dimer.out	0.00800467	0.188865	0.0984349	0.0450636	0.54922	0.252078	0.195034	0.391673	0.0983198	0.168654	0.399668	0.115507	0.141124	0.0558969	0.0985103	0.270019	0.3129	0.0214407	0.190287	0.107543	0.148915	0.164406	0.058224	0.110269	0.176064	0.100636	0.141107	0.168158	0.064657	0.117503	0.224646	0.119622	0.173912		2.45211	2.27125	2.36168	2.50518	1.9109	2.20804	2.65515	2.06844	2.3618	2.62877	2.06045	2.34461
2.57959	35_Neopentane-Pentane_1.00_dimer.out	0.0132451	0.135778	0.0612663	0.06211	0.435589	0.18674	0.201021	0.288871	0.0439248	0.153454	0.324432	0.0854892	0.109867	0.0354047	0.072636	0.270477	0.215512	0.0274825	0.155405	0.0835014	0.119453	0.132883	0.0382057	0.0850114	0.141576	0.0760631	0.11156	0.158614	0.0743716	0.118566	0.21736	0.137229	0.179905		2.59283	2.44381	2.51832	2.6417	2.144	2.39285	2.78061	2.29072	2.53566	2.73304	2.25516	2.4941
2.45554	35_Neopentane-Pentane_1.05_dimer.out	0.0268076	0.0875732	0.0303828	0.0992706	0.329012	0.114871	0.208139	0.214532	0.0031965	0.143253	0.258105	0.0574263	0.0920798	0.00433427	0.048207	0.262574	0.157293	0.0526407	0.127769	0.0418627	0.0848158	0.113846	0.00670701	0.0594962	0.115243	0.0357617	0.0779321	0.158576	0.0520799	0.108133	0.212282	0.107694	0.163688		2.48235	2.36797	2.42516	2.55481	2.12653	2.34067	2.66368	2.24101	2.45235	2.5988	2.19744	2.39812
2.22804	35_Neopentane-Pentane_1.10_dimer.out	0.0648258	0.0409893	0.0119182	0.134316	0.229585	0.0476342	0.216971	0.142376	0.0372976	0.133477	0.20548	0.0360019	0.0349261	0.0254834	0.00472134	0.258299	0.098772	0.0797635	0.0620218	0.00310505	0.0325634	0.0573369	0.0227179	0.0168287	0.0498495	0.00306299	0.025774	0.120492	0.0436637	0.0857204	0.170772	0.0984444	0.139171		2.29287	2.18705	2.23996	2.36236	1.99845	2.18041	2.44501	2.08566	2.26534	2.36152	2.02256	2.19204
1.47908	35_Neopentane-Pentane_1.25_dimer.out	0.063613	0.000159045	0.031886	0.102753	0.111031	0.00413903	0.169455	0.0417689	0.063843	0.091702	0.109374	0.00883593	0.0057806	0.0276484	0.0109339	0.202806	0.00713789	0.0978341	0.0276467	0.00494317	0.0113518	0.0271316	0.0245203	0.0013417	0.0163461	0.0113208	0.00477673	0.085462	0.0464304	0.0693794	0.128919	0.0971961	0.117057		1.5427	1.47924	1.51097	1.58184	1.36805	1.47494	1.64854	1.43732	1.54293	1.57079	1.36971	1.47025
0.689927	35_Neopentane-Pentane_1.50_dimer.out	0.0425623	0.00979572	0.026179	0.0606521	0.0316186	0.0145167	0.0973782	0.00848844	0.0529333	0.039386	0.0425832	0.00159857	0.00662303	0.0106528	0.00863792	0.115741	0.028542	0.0721416	0.00541643	0.00249496	0.0039557	0.00543932	0.00870494	0.00143165	0.000944342	0.00141465	0.000121293	0.0528075	0.0453095	0.0516222	0.0809504	0.0796552	0.0832676		0.73249	0.699723	0.716106	0.75058	0.658309	0.704444	0.787306	0.698416	0.742861	0.729313	0.647344	0.688329
0.184665	35_Neopentane-Pentane_2.00_dimer.out	0.0115854	0.00346081	0.00406228	0.0140788	0.00712206	0.00347838	0.0193729	0.000169488	0.00977119	0.0233021	0.00177995	0.012541	0.00647961	0.00584097	0.000319321	0.0220199	0.00381526	0.0129176	0.00474413	0.00823126	0.00174357	0.0038621	0.00606674	0.000948836	0.00605861	0.0077242	0.00107675	0.0105062	0.00407629	0.0033801	0.00986183	0.00579814	0.0022849		0.19625	0.181204	0.188727	0.198744	0.177543	0.188143	0.204038	0.184834	0.194436	0.207967	0.186445	0.197206
1.42522	36_Neopentane-Neopentane_0.90_dimer.out	0.020907	0.162565	0.0917358	0.0282104	0.450083	0.210936	0.159347	0.304572	0.0726125	0.123676	0.351532	0.113928	0.139087	0.0694599	0.104274	0.224915	0.231816	0.0034506	0.182076	0.117161	0.149619	0.170381	0.0742541	0.12258	0.164693	0.106584	0.139184	0.175643	0.120917	0.149929	0.228537	0.18811	0.209708		1.40431	1.26265	1.33348	1.45343	0.975133	1.21428	1.58456	1.12065	1.3526	1.54889	1.07368	1.31129
1.70454	36_Neopentane-Neopentane_0.95_dimer.out	0.0273069	0.142191	0.0847492	0.0305418	0.375509	0.172484	0.163247	0.237675	0.0372139	0.117956	0.269638	0.0758405	0.152241	0.0795891	0.115915	0.2296	0.168758	0.0304209	0.195744	0.124773	0.160259	0.178993	0.0831794	0.130802	0.180377	0.116264	0.151385	0.198655	0.114612	0.158599	0.254735	0.173063	0.216438		1.67723	1.56235	1.61979	1.73508	1.32903	1.53206	1.86779	1.46687	1.66733	1.8225	1.4349	1.6287
1.74209	36_Neopentane-Neopentane_1.00_dimer.out	0.0523027	0.0624427	0.00506999	0.0893957	0.255788	0.0831963	0.185914	0.158335	0.0137894	0.106539	0.219011	0.0562361	0.0352972	0.000427618	0.0174348	0.234173	0.109608	0.0622822	0.0669375	0.0315193	0.0492284	0.0642928	0.00385512	0.0341575	0.0514449	0.0227342	0.0401969	0.116641	0.0660592	0.094816	0.170322	0.123191	0.151074		1.79439	1.67965	1.73702	1.83149	1.4863	1.65889	1.928	1.58376	1.75588	1.84863	1.52308	1.68585
1.62466	36_Neopentane-Neopentane_1.05_dimer.out	0.0874359	0.0296196	0.0289082	0.115281	0.180803	0.0327608	0.204437	0.0922645	0.0560862	0.127161	0.151167	0.0120026	0.0107261	0.0114525	0.0110893	0.249015	0.0479954	0.10051	0.0185007	0.0175718	0.0180363	0.0155027	0.00767438	0.00389368	0.00444104	0.00976943	0.00991114	0.068466	0.0530901	0.0641517	0.119151	0.106563	0.117066		1.7121	1.59504	1.65357	1.73994	1.44386	1.5919	1.8291	1.5324	1.68075	1.75182	1.47349	1.61266
1.5021	36_Neopentane-Neopentane_1.10_dimer.out	0.0820181	0.0215361	0.030241	0.10611	0.147447	0.0206685	0.174393	0.0752024	0.0495953	0.0985098	0.138607	0.0200488	0.021454	0.0136494	0.0175517	0.208534	0.0390802	0.0847271	0.000930342	0.0100336	0.00548195	0.00277503	0.00999273	0.00346101	0.0117113	0.00275635	0.00193296	0.0563111	0.0558274	0.059408	0.0997668	0.105828	0.106773		1.58412	1.48056	1.53234	1.60821	1.35465	1.48143	1.67649	1.4269	1.55169	1.60061	1.36349	1.48205
1.01832	36_Neopentane-Neopentane_1.25_dimer.out	0.0455465	0.00456388	0.0204913	0.0637085	0.0917328	0.0140122	0.119497	0.0256472	0.0469251	0.0875294	0.0628431	0.0123431	0.00293819	0.00925907	0.00316044	0.147392	0.00739556	0.0773937	0.0212268	0.0124049	0.0168158	0.0235438	0.00585612	0.00926304	0.0105318	0.005656	0.0102955	0.035699	0.0314988	0.0350541	0.0628645	0.0686014	0.0671123		1.06386	1.01375	1.03881	1.08203	0.926585	1.00431	1.13781	0.99267	1.06524	1.10585	0.955474	1.03066
0.497189	36_Neopentane-Neopentane_1.50_dimer.out	0.00522323	0.00277501	0.00122411	0.0426478	0.0359475	0.00335014	0.0636315	0.00767302	0.0279793	0.0376171	0.0333966	0.00211025	0.0330713	0.000436293	0.0163175	0.0741234	0.00646421	0.0402938	0.0399501	0.00883256	0.0243913	0.0417623	0.000947952	0.0214808	0.0355018	0.00605886	0.0216933	0.0597308	0.0277507	0.0449038	0.0738334	0.0476965	0.0620156		0.502412	0.494414	0.498413	0.539837	0.461241	0.500539	0.56082	0.489516	0.525168	0.534806	0.463792	0.499299
0.13246	36_Neopentane-Neopentane_2.00_dimer.out	0.0171872	0.00058948	0.00829884	0.0177243	0.00540836	0.00615795	0.0213978	0.00163011	0.011514	0.0234076	0.00333412	0.0133709	0.0144265	0.00204472	0.0061909	0.0232346	0.00514935	0.014192	0.0132223	0.00435205	0.00443511	0.012178	0.00224368	0.00509397	0.01433	0.00389271	0.0050104	0.0164862	0.000177532	0.00824286	0.01584	0.00177759	0.00713581		0.149648	0.131871	0.140759	0.150185	0.127052	0.138618	0.153858	0.134091	0.143974	0.155868	0.135795	0.145831
1.57585	37_Cyclopentane-Neopentane_0.90_dimer.out	0.0261107	0.252496	0.139303	0.0308935	0.733196	0.351151	0.226831	0.529897	0.151533	0.23861	0.509098	0.135244	0.191948	0.0706213	0.131285	0.324799	0.428248	0.0517243	0.25618	0.137266	0.196723	0.211075	0.0719367	0.140049	0.242707	0.131031	0.189455	0.179876	0.0478303	0.113284	0.240837	0.105842	0.173031		1.54974	1.32335	1.43655	1.60674	0.842654	1.2247	1.80268	1.04595	1.42432	1.81446	1.06675	1.44061
2.21712	37_Cyclopentane-Neopentane_0.95_dimer.out	0.0074705	0.173791	0.08316	0.102201	0.534251	0.216025	0.254564	0.382153	0.0637946	0.22814	0.3917	0.0817799	0.154532	0.0371809	0.0958567	0.330746	0.306104	0.0123207	0.20448	0.0870412	0.14576	0.17576	0.0391364	0.106328	0.191129	0.080835	0.138547	0.181612	0.0476416	0.115731	0.238897	0.101464	0.171918		2.22459	2.04333	2.13396	2.31932	1.68287	2.00109	2.47168	1.83497	2.15332	2.44526	1.82542	2.13534
2.37278	37_Cyclopentane-Neopentane_1.00_dimer.out	0.0223461	0.139847	0.0587502	0.103002	0.432742	0.16487	0.241669	0.298225	0.028278	0.212167	0.311545	0.0496888	0.12145	0.036008	0.0787289	0.311003	0.230967	0.0400181	0.166907	0.080105	0.123506	0.142046	0.0380338	0.0890816	0.154179	0.0741459	0.116611	0.151684	0.0506029	0.102389	0.205333	0.100228	0.154646		2.39512	2.23293	2.31403	2.47578	1.94004	2.20791	2.61445	2.07455	2.3445	2.58495	2.06123	2.32309
2.29461	37_Cyclopentane-Neopentane_1.05_dimer.out	0.0473711	0.0924627	0.0225458	0.127162	0.330109	0.101473	0.241835	0.218273	0.011781	0.195123	0.250873	0.0278749	0.0801261	0.00997702	0.0450516	0.299171	0.162355	0.0684081	0.117718	0.0466387	0.0821783	0.101401	0.0122371	0.0559971	0.105272	0.0407705	0.0754192	0.127996	0.0456987	0.088873	0.178559	0.0958914	0.139854		2.34198	2.20215	2.27206	2.42177	1.9645	2.19314	2.53645	2.07634	2.30639	2.48973	2.04374	2.26674
2.11081	37_Cyclopentane-Neopentane_1.10_dimer.out	0.0841949	0.0335213	0.0253368	0.172386	0.222629	0.0251218	0.263639	0.130708	0.0664658	0.18009	0.203767	0.0118387	0.0334551	0.0301974	0.00162886	0.309266	0.0847469	0.11226	0.0633696	6.38855e-05	0.0316529	0.057956	0.0269325	0.015228	0.0500401	0.00712077	0.0240917	0.119077	0.0498581	0.0881587	0.172192	0.110316	0.14554		2.195	2.07729	2.13615	2.28319	1.88818	2.08569	2.37445	1.9801	2.17727	2.2909	1.90704	2.09897
1.44924	37_Cyclopentane-Neopentane_1.25_dimer.out	0.0751281	0.00325362	0.0359373	0.136458	0.115794	0.0103323	0.202619	0.0461032	0.0782581	0.139244	0.107413	0.0159153	0.00845953	0.0248401	0.00819026	0.2357	0.011258	0.112221	0.0301483	0.0019943	0.014077	0.0283039	0.0219462	0.00319871	0.0195427	0.0080087	0.0078942	0.0734069	0.0423411	0.0607012	0.112694	0.0906345	0.104749		1.52436	1.44598	1.48517	1.58569	1.33344	1.45957	1.65185	1.40313	1.52749	1.58848	1.34182	1.46515
0.698891	37_Cyclopentane-Neopentane_1.50_dimer.out	0.0606993	0.01331	0.0370047	0.0886697	0.037795	0.0254374	0.127666	0.0020724	0.0648691	0.0685334	0.0508653	0.00883408	0.0167937	0.0206778	0.0187357	0.147164	0.0220061	0.084585	0.00401008	0.00760861	0.00580935	0.00355653	0.0186931	0.0110572	0.0109582	0.0115718	0.00986948	0.0438053	0.0373292	0.0431854	0.0730089	0.072371	0.0756888		0.75959	0.712201	0.735896	0.787561	0.661096	0.724328	0.826557	0.700963	0.76376	0.767424	0.648026	0.707725
0.188656	37_Cyclopentane-Neopentane_2.00_dimer.out	0.0173147	0.00324196	0.00703638	0.0245642	0.0103575	0.00710335	0.0297453	0.00290037	0.0134225	0.031702	0.00244024	0.0170711	0.00916479	0.00346593	0.00284943	0.0323359	0.000828217	0.0165821	0.00746634	0.00591052	0.000777912	0.00643388	0.00368412	0.00155239	0.00882936	0.0054121	0.00145792	0.0111699	0.0023861	0.0068813	0.0100148	0.00215821	0.0060845		0.205971	0.185414	0.195692	0.21322	0.178298	0.195759	0.218401	0.185755	0.202078	0.220358	0.191096	0.205727
2.19808	38_Cyclopentane-Cyclopentane_0.90_dimer.out	0.054622	0.314343	0.184483	0.113224	0.802849	0.344813	0.299983	0.610792	0.155404	0.353995	0.536266	0.0911359	0.287113	0.119982	0.203547	0.393363	0.514763	0.0607003	0.348336	0.182941	0.265639	0.296413	0.118423	0.204509	0.339536	0.181498	0.261989	0.231762	0.0383191	0.132528	0.277987	0.0703458	0.172166		2.14346	1.88374	2.0136	2.31131	1.39523	1.85327	2.49806	1.58729	2.04268	2.55208	1.66182	2.10695
2.80041	38_Cyclopentane-Cyclopentane_0.95_dimer.out	0.0146971	0.20848	0.0968913	0.213733	0.585565	0.185916	0.362498	0.435794	0.0366477	0.354091	0.428462	0.0371855	0.213333	0.0594449	0.136389	0.436881	0.360908	0.0379864	0.262101	0.108542	0.185322	0.23413	0.060633	0.145556	0.249034	0.103602	0.178735	0.221949	0.051411	0.136983	0.273052	0.0974653	0.186104		2.81511	2.59193	2.70352	3.01414	2.21485	2.6145	3.16291	2.36462	2.76376	3.1545	2.37195	2.76323
2.95617	38_Cyclopentane-Cyclopentane_1.00_dimer.out	0.0229035	0.158671	0.0678835	0.216834	0.472804	0.127985	0.358521	0.33227	0.0131252	0.338011	0.337414	0.000298368	0.197139	0.0448524	0.120996	0.429364	0.262004	0.0836802	0.243586	0.0909218	0.167254	0.217014	0.0461399	0.129984	0.231109	0.0860118	0.160884	0.218158	0.0504883	0.13517	0.2703	0.0986925	0.185909		2.97907	2.7975	2.88829	3.17301	2.48337	2.82819	3.31469	2.6239	2.9693	3.29418	2.61876	2.95647
2.82352	38_Cyclopentane-Cyclopentane_1.05_dimer.out	0.0335414	0.110363	0.0384107	0.253938	0.348752	0.0474072	0.362027	0.243175	0.0594262	0.313246	0.269385	0.0219303	0.181825	0.0232868	0.102556	0.416071	0.190386	0.112843	0.217258	0.0578971	0.137578	0.203202	0.02507	0.112822	0.204928	0.0529134	0.131228	0.231816	0.0520073	0.14399	0.280795	0.0974966	0.192112		2.85706	2.71315	2.7851	3.07745	2.47476	2.77611	3.18554	2.58034	2.88294	3.13676	2.55413	2.84545
2.56285	38_Cyclopentane-Cyclopentane_1.10_dimer.out	0.0630042	0.054312	0.00434612	0.275803	0.244955	0.0154239	0.365257	0.152997	0.10613	0.288293	0.214895	0.0366992	0.135163	0.0103895	0.0623868	0.409984	0.107018	0.151483	0.164488	0.019756	0.0921218	0.158403	0.00772422	0.074638	0.151773	0.0136501	0.0851706	0.214036	0.0574356	0.139111	0.264732	0.113273	0.193103		2.62585	2.50853	2.56719	2.83865	2.31789	2.57827	2.9281	2.40985	2.66898	2.85114	2.34795	2.59955
1.69325	38_Cyclopentane-Cyclopentane_1.25_dimer.out	0.0947178	0.0355243	0.0651211	0.250295	0.0791244	0.0855854	0.315681	0.0133228	0.151179	0.199768	0.119893	0.0399376	0.0501535	0.0675502	0.00869834	0.348374	0.019578	0.183976	0.0715882	0.0459793	0.0128044	0.0750246	0.0638975	0.00561429	0.0587272	0.0531187	0.00537112	0.168942	0.049225	0.114228	0.222563	0.115029	0.174596		1.78797	1.72878	1.75837	1.94355	1.61413	1.77884	2.00893	1.67993	1.84443	1.89302	1.57336	1.73319
0.780367	38_Cyclopentane-Cyclopentane_1.50_dimer.out	0.0822664	0.0372315	0.059749	0.144966	0.0148524	0.0650567	0.184708	0.025853	0.10528	0.100326	0.0551125	0.0226068	0.0151024	0.0446916	0.029897	0.204579	0.0462057	0.125392	0.00207425	0.0313477	0.016711	0.00079216	0.0423887	0.0207973	0.0102431	0.035833	0.0214117	0.0713721	0.0440273	0.0614608	0.107831	0.0909771	0.103531		0.862633	0.817598	0.840116	0.925333	0.765514	0.845423	0.965075	0.80622	0.885647	0.880693	0.725254	0.802974
0.200665	38_Cyclopentane-Cyclopentane_2.00_dimer.out	0.0151732	0.0063696	0.0107714	0.0316463	0.00459812	0.0135241	0.0391007	0.00378113	0.0214409	0.0477596	0.00833193	0.0280458	0.000514439	0.00806669	0.00377613	0.0428279	0.00797076	0.0253993	0.00295812	0.00531983	0.00118086	0.00362927	0.00784797	0.002342	0.00136549	0.00583789	0.00194857	0.00835921	0.0130533	0.0110748	0.00831995	0.0121953	0.010787		0.215838	0.207035	0.211437	0.232311	0.196067	0.214189	0.239766	0.204446	0.222106	0.248425	0.208997	0.228711
1.9687	39_Benzene-Cyclopentane_0.90_dimer.out	0.13087	0.288905	0.0790176	0.547912	0.866579	0.159333	0.812562	0.604285	0.104138	0.832568	0.556292	0.138138	0.316071	0.0821307	0.199101	0.944887	0.473139	0.235874	0.402828	0.168115	0.285472	0.269095	0.0674509	0.160387	0.417575	0.186063	0.298069	0.29557	0.029541	0.16153	0.376772	0.0956047	0.236022		2.09957	1.67979	1.88968	2.51661	1.10212	1.80937	2.78126	1.36441	2.07284	2.80127	1.41241	2.10684
3.08098	39_Benzene-Cyclopentane_0.95_dimer.out	0.153517	0.201139	0.0238109	0.543856	0.645148	0.0506458	0.760701	0.435602	0.16255	0.744861	0.426087	0.159387	0.244573	0.0474178	0.145995	0.869124	0.330828	0.269148	0.315659	0.116111	0.215885	0.201777	0.0338802	0.110481	0.32969	0.133322	0.227927	0.260806	0.0369923	0.149491	0.33629	0.101736	0.220485		3.2345	2.87984	3.05717	3.62483	2.43583	3.03033	3.84168	2.64538	3.24353	3.82584	2.65489	3.24037
3.43781	39_Benzene-Cyclopentane_1.00_dimer.out	0.151906	0.14263	0.00463783	0.533654	0.480065	0.0267942	0.704962	0.316434	0.194264	0.667438	0.316738	0.17535	0.210697	0.0286785	0.119688	0.790616	0.234618	0.277999	0.266855	0.0823197	0.174587	0.176527	0.01747	0.0907315	0.278103	0.0967709	0.184514	0.249151	0.0290122	0.140589	0.315729	0.0827798	0.202096		3.58972	3.29518	3.44245	3.97146	2.95775	3.46461	4.14277	3.12138	3.63208	4.10525	3.12107	3.61316
3.36393	39_Benzene-Cyclopentane_1.05_dimer.out	0.160593	0.0858142	0.0373895	0.505671	0.351444	0.0771134	0.649465	0.211551	0.218957	0.592692	0.240255	0.176219	0.159928	0.00337652	0.0816522	0.721362	0.141605	0.289878	0.207066	0.0492358	0.128151	0.131107	0.00619211	0.0570567	0.21657	0.0615685	0.13659	0.218109	0.0348284	0.128879	0.281011	0.0926013	0.190309		3.52452	3.27811	3.40132	3.8696	3.01248	3.44104	4.01339	3.15238	3.58289	3.95662	3.12367	3.54015
3.08312	39_Benzene-Cyclopentane_1.10_dimer.out	0.170882	0.0347711	0.0680555	0.501288	0.225749	0.13777	0.617166	0.111131	0.253017	0.521107	0.183331	0.168888	0.121717	0.0152934	0.053212	0.675105	0.0538226	0.310641	0.159704	0.0222803	0.0909922	0.106832	0.0213619	0.0388179	0.16359	0.0295735	0.0953818	0.22016	0.0638202	0.146179	0.28482	0.131361	0.213352		3.254	3.04835	3.15118	3.58441	2.85737	3.22089	3.70029	2.97199	3.33614	3.60423	2.89979	3.25201
2.02564	39_Benzene-Cyclopentane_1.25_dimer.out	0.217707	0.096747	0.157227	0.461369	0.000453594	0.230458	0.523798	0.0680329	0.295915	0.347232	0.0922992	0.127466	0.0170226	0.115573	0.0662977	0.555012	0.102276	0.328644	0.00344241	0.0931218	0.0448397	0.00350948	0.114707	0.0602009	0.00420679	0.0958929	0.048645	0.163922	0.0601129	0.119845	0.233416	0.149112	0.200154		2.24335	2.12239	2.18287	2.48701	2.02519	2.2561	2.54944	2.09368	2.32156	2.37288	1.93335	2.15311
0.88369	39_Benzene-Cyclopentane_1.50_dimer.out	0.186064	0.12356	0.154812	0.283864	0.0739794	0.178922	0.320891	0.114876	0.217884	0.162722	0.0363119	0.0632048	0.0976661	0.129254	0.11346	0.339405	0.135325	0.237365	0.0855279	0.115847	0.100688	0.081654	0.126833	0.104142	0.0936832	0.120523	0.105463	0.0644265	0.0364124	0.0574669	0.120486	0.112572	0.12428		1.06975	1.00725	1.0385	1.16755	0.957669	1.06261	1.20458	0.998566	1.10157	1.04641	0.847378	0.946895
0.188667	39_Benzene-Cyclopentane_2.00_dimer.out	0.040438	0.021025	0.0307315	0.061242	0.0111339	0.0361879	0.0731889	0.0233423	0.0482656	0.0614149	0.0136658	0.0375404	0.0189655	0.0195056	0.0192355	0.0791624	0.0294466	0.0543045	0.015049	0.0155034	0.0152762	0.0154785	0.0191382	0.0174462	0.0169205	0.0163355	0.0162716	0.00689944	0.00890244	0.00738365	0.000286409	0.00088392	0.000322717		0.229105	0.209692	0.219398	0.249909	0.1998	0.224854	0.261855	0.212009	0.236932	0.250081	0.202332	0.226207
1.7119	40_Benzene-Neopentane_0.90_dimer.out	0.147881	0.172532	0.0123252	0.425982	0.637085	0.105551	0.63576	0.427093	0.104333	0.594713	0.448415	0.0731491	0.171988	0.0056326	0.0888105	0.740649	0.322098	0.209276	0.240757	0.0744714	0.157614	0.160925	0.000122895	0.0762433	0.240604	0.0793224	0.159586	0.214054	0.0289955	0.12327	0.294221	0.106684	0.202969		1.85978	1.53937	1.69957	2.13788	1.07481	1.60635	2.34766	1.2848	1.81623	2.30661	1.26348	1.78505
2.54891	40_Benzene-Neopentane_0.95_dimer.out	0.1364	0.134673	0.000863682	0.396394	0.493068	0.0483372	0.568054	0.321201	0.123427	0.523662	0.346392	0.0886351	0.146607	0.0123784	0.0794928	0.653884	0.235267	0.209309	0.20288	0.0687194	0.1358	0.132001	0.00618774	0.0650144	0.205268	0.0750387	0.139264	0.1921	0.0399819	0.117939	0.2607	0.106779	0.186401		2.68531	2.41424	2.54978	2.94531	2.05585	2.50058	3.11697	2.22771	2.67234	3.07258	2.20252	2.63755
2.79053	40_Benzene-Neopentane_1.00_dimer.out	0.148387	0.0834503	0.0324685	0.367082	0.380259	0.00658859	0.519257	0.221261	0.148998	0.462324	0.267361	0.0974819	0.0947674	0.00690333	0.043932	0.595344	0.141762	0.226791	0.144653	0.0452189	0.0949359	0.0829875	0.0120167	0.0320743	0.146241	0.0500909	0.0975193	0.153112	0.0436106	0.100859	0.218806	0.114867	0.169861		2.93891	2.70708	2.823	3.15761	2.41027	2.78394	3.30978	2.56927	2.93952	3.25285	2.52317	2.88801
2.72088	40_Benzene-Neopentane_1.05_dimer.out	0.156983	0.0369585	0.0600122	0.355684	0.272832	0.041426	0.478125	0.146218	0.165954	0.41284	0.202815	0.105012	0.0535692	0.0346758	0.00944669	0.539346	0.0829111	0.228217	0.0937075	0.00683043	0.050269	0.0427081	0.0392414	0.00126271	0.0956109	0.0114937	0.0528745	0.120474	0.0273413	0.0767896	0.178741	0.092339	0.138903		2.87786	2.68392	2.78089	3.07657	2.44805	2.76231	3.19901	2.57466	2.88684	3.13372	2.51807	2.82589
2.5023	40_Benzene-Neopentane_1.10_dimer.out	0.205823	0.0298721	0.117848	0.389782	0.150025	0.119878	0.489913	0.0484817	0.220716	0.361651	0.157534	0.102059	0.0195638	0.0812436	0.0504037	0.539979	0.00229015	0.271135	0.0132609	0.0479558	0.0173474	0.0185958	0.0830517	0.0527742	0.0103607	0.0471576	0.0180185	0.111879	0.0382512	0.0807173	0.18032	0.116803	0.155229		2.70813	2.53218	2.62015	2.89209	2.35228	2.62218	2.99222	2.45382	2.72302	2.86396	2.34477	2.60436
1.67429	40_Benzene-Neopentane_1.25_dimer.out	0.199961	0.09461	0.147286	0.328995	0.0101054	0.159445	0.39548	0.0577925	0.226636	0.248395	0.0750538	0.0866707	0.0717724	0.118749	0.0952607	0.428723	0.0917415	0.260232	0.0499774	0.0964908	0.0732341	0.0575933	0.117214	0.0879227	0.0580277	0.100312	0.0776166	0.0789603	0.026819	0.0594072	0.141598	0.104217	0.130334		1.87425	1.7689	1.82158	2.00329	1.66419	1.83374	2.06977	1.73209	1.90093	1.92269	1.59924	1.76096
0.762121	40_Benzene-Neopentane_1.50_dimer.out	0.143086	0.086173	0.11463	0.191778	0.0424205	0.117099	0.22756	0.0778055	0.152683	0.111581	0.0294921	0.0410444	0.0877021	0.0916591	0.0896806	0.245451	0.095498	0.170475	0.0759721	0.0800593	0.0780157	0.0739521	0.0895329	0.0816075	0.0830732	0.0841555	0.0821844	0.0311536	0.0259135	0.0336846	0.0750889	0.0820487	0.0843527		0.905207	0.848294	0.87675	0.953899	0.804541	0.87922	0.989681	0.839926	0.914803	0.873702	0.732629	0.803165
0.186544	40_Benzene-Neopentane_2.00_dimer.out	0.0364507	0.0187629	0.0276068	0.0498341	0.0078939	0.028864	0.0598377	0.0185112	0.0391745	0.0514414	0.0102773	0.0308593	0.0211174	0.018928	0.0200227	0.0648395	0.0238199	0.0443297	0.0178381	0.0154474	0.0166428	0.01819	0.0185452	0.0184089	0.0194086	0.0162715	0.0175305	0.0125128	0.00990553	0.0108341	0.00690196	0.00300738	0.00454909		0.222995	0.205307	0.214151	0.236378	0.194438	0.215408	0.246382	0.205055	0.225719	0.237985	0.196821	0.217403
3.67913	41_Uracil-Pentane_0.90_dimer.out	0.153794	0.442793	0.1445	0.451211	1.22327	0.386029	0.894783	0.788793	0.0529948	0.94828	0.722952	0.112664	0.332024	0.215944	0.273984	1.11657	0.571555	0.272507	0.477434	0.358373	0.417904	0.318882	0.20876	0.258534	0.472473	0.360912	0.417245	0.2772	0.143797	0.208047	0.407755	0.258898	0.33112		3.83292	3.23634	3.53463	4.13034	2.45586	3.2931	4.57391	2.89034	3.73213	4.62741	2.95618	3.7918
4.56038	41_Uracil-Pentane_0.95_dimer.out	0.160384	0.343594	0.0916048	0.443399	0.974128	0.265364	0.797331	0.629034	0.0841483	0.842783	0.567657	0.137563	0.25722	0.156449	0.206835	0.974296	0.456487	0.258905	0.373245	0.269576	0.321411	0.244579	0.149491	0.191902	0.370262	0.27358	0.322049	0.210641	0.089194	0.147809	0.314045	0.176846	0.243724		4.72076	4.21678	4.46877	5.00378	3.58625	4.29501	5.35771	3.93134	4.64452	5.40316	3.99272	4.69794
4.72406	41_Uracil-Pentane_1.00_dimer.out	0.159722	0.267772	0.0540247	0.421447	0.776623	0.177588	0.725146	0.477211	0.123967	0.754881	0.445048	0.154917	0.210989	0.130456	0.170722	0.876995	0.327505	0.274745	0.310546	0.228609	0.269578	0.201153	0.124621	0.158472	0.307529	0.231762	0.269849	0.180516	0.0952128	0.136522	0.271816	0.180015	0.224564		4.88379	4.45629	4.67004	5.14551	3.94744	4.54648	5.44921	4.24685	4.84803	5.47895	4.27902	4.87898
4.50168	41_Uracil-Pentane_1.05_dimer.out	0.202918	0.160542	0.0211879	0.453478	0.568612	0.0575673	0.705989	0.320932	0.192529	0.678761	0.345904	0.166428	0.126913	0.0553855	0.091149	0.832245	0.197091	0.317577	0.20969	0.136579	0.173135	0.120187	0.0506233	0.0816126	0.206524	0.139085	0.173084	0.154816	0.0827496	0.119991	0.245155	0.174309	0.211096		4.7046	4.34114	4.52287	4.95516	3.93307	4.44412	5.20767	4.18075	4.69421	5.18044	4.15578	4.66811
3.99925	41_Uracil-Pentane_1.10_dimer.out	0.233756	0.0673115	0.0832225	0.477029	0.357053	0.0599878	0.66833	0.170131	0.249099	0.583103	0.259564	0.161769	0.0511649	0.000100564	0.0255321	0.763981	0.0766704	0.343655	0.113877	0.0611756	0.0875262	0.0616157	0.000337582	0.0288865	0.104444	0.0577387	0.0828254	0.138506	0.0978963	0.122036	0.224884	0.196293	0.21454		4.23301	3.93194	4.08247	4.47628	3.6422	4.05924	4.66758	3.82912	4.24835	4.58235	3.73969	4.16102
2.40241	41_Uracil-Pentane_1.25_dimer.out	0.236115	0.0718304	0.153973	0.414859	0.0597293	0.177565	0.523645	0.0401229	0.281884	0.343533	0.141971	0.100781	0.047601	0.092619	0.07011	0.578038	0.090049	0.334044	0.0119391	0.0598857	0.0359124	0.0165931	0.087846	0.051937	0.0286439	0.0694978	0.0457088	0.136978	0.106913	0.130017	0.222654	0.215227	0.227486		2.63853	2.47424	2.55639	2.81727	2.34268	2.57998	2.92606	2.44254	2.6843	2.74595	2.26044	2.50319
0.961312	41_Uracil-Pentane_1.50_dimer.out	0.14394	0.0819744	0.112957	0.206853	0.00670533	0.106779	0.270591	0.0697573	0.170174	0.131379	0.0696325	0.0308733	0.0609041	0.0899844	0.0754443	0.30246	0.101283	0.201871	0.0400098	0.0693149	0.0546624	0.0433935	0.0871029	0.0649022	0.0494998	0.0751745	0.0603942	0.0817602	0.0627535	0.0784889	0.141311	0.141279	0.147938		1.10525	1.04329	1.07427	1.16817	0.968018	1.06809	1.2319	1.03107	1.13149	1.09269	0.89168	0.992186
0.212103	41_Uracil-Pentane_2.00_dimer.out	0.0236932	0.00551162	0.0146024	0.0239209	0.00534989	0.0092855	0.0379451	0.00380541	0.0208753	0.0542257	0.0119018	0.0330638	0.0143492	0.00663028	0.0104897	0.0449573	0.00838306	0.0266702	0.00975178	0.00362901	0.00669039	0.0117453	0.00641004	0.00923474	0.0112748	0.0041653	0.0074416	0.0310335	0.015502	0.0239585	0.0309569	0.0158613	0.0244175		0.235796	0.217614	0.226705	0.236024	0.206753	0.221388	0.250048	0.215908	0.232978	0.266328	0.224005	0.245167
2.89976	42_Uracil-Cyclopentane_0.90_dimer.out	0.168206	0.394411	0.113103	0.543542	1.08001	0.268236	0.929885	0.696968	0.116458	0.997154	0.635091	0.181032	0.331177	0.196045	0.263611	1.12306	0.505446	0.308805	0.457826	0.321613	0.38972	0.321046	0.189621	0.250371	0.45291	0.323994	0.389011	0.262239	0.128241	0.192254	0.37021	0.228127	0.295804		3.06797	2.50535	2.78666	3.4433	1.81975	2.63152	3.82965	2.20279	3.01622	3.89691	2.26467	3.08079
3.83639	42_Uracil-Cyclopentane_0.95_dimer.out	0.198269	0.275672	0.0387016	0.562661	0.820026	0.128683	0.881054	0.501536	0.189759	0.902602	0.476999	0.212801	0.249389	0.127588	0.188488	1.04025	0.342291	0.34898	0.353763	0.231994	0.292879	0.246969	0.123199	0.181042	0.347029	0.232462	0.290742	0.227306	0.100701	0.163025	0.325697	0.194923	0.259365		4.03466	3.56072	3.79769	4.39905	3.01636	3.70771	4.71744	3.33485	4.02615	4.73899	3.35939	4.04919
4.01859	42_Uracil-Cyclopentane_1.00_dimer.out	0.199803	0.187069	0.00636713	0.564394	0.610595	0.0231006	0.818764	0.357247	0.230758	0.801209	0.373816	0.213697	0.206009	0.0754935	0.140751	0.945948	0.230573	0.357687	0.289396	0.158545	0.223971	0.200774	0.0706868	0.131677	0.28551	0.161006	0.223652	0.223999	0.0936489	0.159605	0.31226	0.183578	0.248785		4.21839	3.83152	4.02496	4.58298	3.40799	3.99549	4.83735	3.66134	4.24935	4.8198	3.64477	4.23229
3.82252	42_Uracil-Cyclopentane_1.05_dimer.out	0.225162	0.106274	0.0594442	0.56324	0.435085	0.0640778	0.770816	0.230212	0.270302	0.709223	0.291675	0.208774	0.132587	0.025016	0.0788014	0.874604	0.127775	0.373414	0.200634	0.0921769	0.146405	0.13795	0.0229168	0.0775543	0.193103	0.0913293	0.143444	0.195708	0.0923651	0.146793	0.280858	0.185037	0.235893		4.04768	3.71624	3.88196	4.38576	3.38743	3.88659	4.59333	3.59231	4.09282	4.53174	3.53084	4.03129
3.45872	42_Uracil-Cyclopentane_1.10_dimer.out	0.239057	0.0386709	0.100193	0.547122	0.310446	0.118338	0.72862	0.129333	0.299644	0.621309	0.234097	0.193606	0.0819178	0.02077	0.0305739	0.819369	0.0387762	0.390296	0.141416	0.038602	0.0900089	0.0950671	0.0207684	0.0352444	0.131003	0.0349049	0.0848603	0.19189	0.0940263	0.14775	0.281187	0.196882	0.244231		3.69777	3.42005	3.55891	4.00584	3.14827	3.57706	4.18734	3.32939	3.75836	4.08003	3.22462	3.65232
2.2488	42_Uracil-Cyclopentane_1.25_dimer.out	0.26667	0.091254	0.178962	0.475778	0.0687118	0.203533	0.596213	0.0486133	0.322413	0.407574	0.13517	0.136202	0.0506104	0.119211	0.0849105	0.656431	0.107276	0.381854	0.0111295	0.0807495	0.0459395	0.0234819	0.115418	0.0695867	0.0263654	0.0891618	0.0547265	0.142707	0.0821715	0.120861	0.23457	0.196914	0.224888		2.51547	2.34006	2.42777	2.72458	2.18009	2.45234	2.84502	2.29742	2.57122	2.65638	2.11364	2.38501
1.00044	42_Uracil-Cyclopentane_1.50_dimer.out	0.165344	0.0812439	0.123294	0.250897	0.00206714	0.124415	0.319238	0.0638182	0.191528	0.191444	0.0716933	0.0598754	0.0644456	0.0926687	0.0785571	0.353408	0.0967609	0.225084	0.0420423	0.0710703	0.0565563	0.0452566	0.0899612	0.0676806	0.052405	0.0767113	0.0624992	0.0665175	0.0558196	0.0669245	0.124407	0.133664	0.134921		1.16579	1.08169	1.12374	1.25134	0.998377	1.12486	1.31968	1.06426	1.19197	1.19189	0.928751	1.06032
0.24558	42_Uracil-Cyclopentane_2.00_dimer.out	0.0386283	0.0145798	0.026604	0.070371	0.00397715	0.0331969	0.0834417	0.00715473	0.0452982	0.0812805	0.00826313	0.0447718	0.0092471	0.0194479	0.0143475	0.0899771	0.0127207	0.0513489	0.00496228	0.0157987	0.0103805	0.0052181	0.0191499	0.0124698	0.00710663	0.0164988	0.0114152	0.00703226	0.0206624	0.0137658	0.00214731	0.0174733	0.00961485		0.284208	0.26016	0.272184	0.315951	0.241603	0.278777	0.329022	0.252735	0.290878	0.32686	0.253843	0.290352
2.75624	43_Uracil-Neopentane_0.90_dimer.out	0.190728	0.251622	0.0304473	0.423838	0.830236	0.203199	0.749073	0.495953	0.12656	0.721884	0.523327	0.0992786	0.175343	0.0914307	0.133387	0.911691	0.328812	0.29144	0.281961	0.201014	0.241487	0.18606	0.0903467	0.135564	0.269114	0.195916	0.234911	0.203206	0.121426	0.163534	0.317374	0.242371	0.281166		2.94696	2.50461	2.72579	3.18007	1.926	2.55304	3.50531	2.26028	2.8828	3.47812	2.23291	2.85551
3.49966	43_Uracil-Neopentane_0.95_dimer.out	0.209546	0.155822	0.0268624	0.436686	0.613368	0.0883412	0.698088	0.340371	0.178858	0.641982	0.400511	0.120735	0.110758	0.0348248	0.0727913	0.828788	0.203872	0.312458	0.19645	0.124318	0.160384	0.116432	0.0328914	0.0719035	0.187454	0.121818	0.156225	0.168255	0.100724	0.13702	0.269527	0.215179	0.244918		3.70921	3.34384	3.52653	3.93635	2.8863	3.41132	4.19775	3.15929	3.67852	4.14165	3.09915	3.6204
3.61265	43_Uracil-Neopentane_1.00_dimer.out	0.193777	0.104578	0.0445993	0.415022	0.479314	0.0321463	0.638899	0.241052	0.198923	0.575672	0.308256	0.133708	0.0980604	0.0151014	0.0565809	0.750837	0.121921	0.314458	0.171451	0.0932079	0.132329	0.108257	0.0145304	0.0593437	0.161332	0.0892539	0.127175	0.162855	0.0887412	0.128647	0.253803	0.194742	0.22718		3.80642	3.50807	3.65725	4.02767	3.13333	3.5805	4.25155	3.3716	3.81157	4.18832	3.30439	3.74636
3.4152	43_Uracil-Neopentane_1.05_dimer.out	0.179263	0.072232	0.0535153	0.389553	0.370649	0.00945209	0.58373	0.164985	0.209373	0.512093	0.238968	0.136563	0.0859203	0.0114198	0.0486701	0.680819	0.0621533	0.309333	0.149575	0.07884	0.114207	0.0988575	0.0117362	0.0537377	0.138947	0.0741426	0.108566	0.159334	0.0924872	0.129128	0.242881	0.190615	0.220103		3.59446	3.34297	3.46871	3.80475	3.04455	3.42465	3.99893	3.25021	3.62457	3.92729	3.17623	3.55176
3.0833	43_Uracil-Neopentane_1.10_dimer.out	0.180557	0.0292815	0.075638	0.357357	0.29206	0.0326486	0.530988	0.109869	0.21056	0.445707	0.192847	0.12643	0.0491971	0.0235546	0.0128213	0.617804	0.0187738	0.299515	0.106116	0.0361706	0.0711435	0.0644095	0.0225285	0.0197621	0.0949638	0.0308256	0.0650507	0.136593	0.0673691	0.105788	0.217194	0.161535	0.193502		3.26385	3.05401	3.15893	3.44065	2.79124	3.11594	3.61428	2.97343	3.29385	3.529	2.89045	3.20973
2.01329	43_Uracil-Neopentane_1.25_dimer.out	0.164532	0.0392611	0.101897	0.302669	0.0928318	0.104919	0.403077	0.0106613	0.206869	0.288781	0.107394	0.0906935	0.00813369	0.0580121	0.0330729	0.453281	0.0624079	0.257845	0.0247818	0.0240853	0.000348241	0.0175402	0.0539979	0.0179325	0.0106965	0.0325675	0.0080695	0.108997	0.0713481	0.0953063	0.173651	0.154275	0.169316		2.17783	2.05255	2.11519	2.31596	1.92046	2.11821	2.41637	2.02395	2.22016	2.30207	1.9059	2.10399
0.912106	43_Uracil-Neopentane_1.50_dimer.out	0.108818	0.0524006	0.0806092	0.176643	0.0171743	0.0797341	0.221145	0.0310922	0.126118	0.140626	0.0490345	0.0457956	0.0351723	0.0663711	0.0507717	0.243396	0.0552255	0.149311	0.0205838	0.0505486	0.0355662	0.0202881	0.0641597	0.0421681	0.0284126	0.0550429	0.0401529	0.0473436	0.0214286	0.0379884	0.0842908	0.0705089	0.0812564		1.02092	0.964507	0.992716	1.08875	0.894932	0.991841	1.13325	0.943199	1.03822	1.05273	0.863072	0.957902
0.228658	43_Uracil-Neopentane_2.00_dimer.out	0.0338903	0.002628	0.0182592	0.0465087	0.00255938	0.0219746	0.0527604	0.00115497	0.0269577	0.0475573	0.00523865	0.026398	0.0215185	0.00359376	0.0125561	0.0558863	0.00301215	0.0294492	0.0194691	0.00237613	0.0109226	0.0179779	0.00335458	0.0109401	0.0212247	0.0028315	0.0117206	0.0161863	0.0080685	0.0119376	0.0126921	0.00854585	0.0101085		0.262548	0.231286	0.246917	0.275167	0.226099	0.250633	0.281419	0.229813	0.255616	0.276215	0.233897	0.255056
1.59748	44_Ethene-Pentane_0.90_dimer.out	0.00317043	0.182933	0.0930515	0.0119056	0.525851	0.268878	0.0843405	0.409215	0.162437	0.127387	0.359712	0.116162	0.0605456	0.0345738	0.0475597	0.132464	0.350898	0.109217	0.0920967	0.072809	0.0824529	0.0526643	0.0316071	0.0403083	0.093296	0.0751383	0.0838404	0.0164311	0.0196701	0.00357633	0.0360288	0.00198209	0.0151496		1.59431	1.41455	1.50443	1.58557	1.07163	1.3286	1.68182	1.18826	1.43504	1.72487	1.23777	1.48132
1.91823	44_Ethene-Pentane_0.95_dimer.out	0.0175736	0.138283	0.0603549	0.00302673	0.423452	0.210213	0.0886444	0.315458	0.113407	0.126309	0.276774	0.0752324	0.0290228	0.0221219	0.0255724	0.131453	0.26146	0.0650036	0.0570897	0.0575244	0.0573071	0.0258029	0.0202616	0.0216367	0.0564413	0.0582739	0.0573954	0.00957573	0.0202665	0.0166117	0.00803248	0.000920373	0.00178601		1.9358	1.77994	1.85787	1.92125	1.49478	1.70802	2.00687	1.60277	1.80482	2.04454	1.64145	1.843
1.94265	44_Ethene-Pentane_1.00_dimer.out	0.0166771	0.114048	0.0486852	0.0271001	0.32826	0.15058	0.0939538	0.241085	0.0735654	0.117498	0.219929	0.0512153	0.0339881	0.0307576	0.0323729	0.127381	0.197497	0.0350581	0.0559039	0.0593353	0.0576196	0.0318283	0.0291216	0.0291502	0.0552372	0.0601535	0.0577302	0.00985982	0.00757569	0.00767497	0.0252378	0.0273722	0.0251132		1.95933	1.8286	1.89397	1.96975	1.61439	1.79207	2.0366	1.70157	1.86909	2.06015	1.72272	1.89144
1.82187	44_Ethene-Pentane_1.05_dimer.out	0.0278531	0.0757002	0.0239236	0.0520265	0.244662	0.0963176	0.10069	0.179333	0.0393215	0.111036	0.167181	0.0280727	0.0199014	0.00775488	0.0138282	0.125022	0.146669	0.0108235	0.0358542	0.0291707	0.0325125	0.019568	0.00670699	0.0121368	0.0348085	0.0295012	0.0322883	0.0092995	0.00556106	0.00139776	0.0223795	0.0108108	0.0161521		1.84972	1.74617	1.79794	1.87389	1.57721	1.72555	1.92256	1.64253	1.78255	1.9329	1.65469	1.79379
1.63925	44_Ethene-Pentane_1.10_dimer.out	0.0250958	0.0638924	0.0193983	0.0478629	0.199091	0.075614	0.0938365	0.140821	0.0234922	0.102755	0.132118	0.0146815	0.0199729	0.0134554	0.0167142	0.116823	0.111686	0.00256872	0.0350438	0.0325573	0.0338006	0.0225727	0.0132796	0.0173733	0.032737	0.0316476	0.0326221	0.0108334	0.00391902	0.00697799	0.0234278	0.0194086	0.0209862		1.66434	1.57536	1.61985	1.68711	1.44016	1.56363	1.73308	1.49843	1.61576	1.742	1.50713	1.62457
1.06878	44_Ethene-Pentane_1.25_dimer.out	0.043587	0.00682611	0.0183805	0.0877196	0.0637923	0.0119637	0.103833	0.0395062	0.0321636	0.078017	0.0657825	0.00611728	0.0040875	0.0146001	0.00934379	0.11189	0.0273631	0.0422635	0.00119484	0.00663867	0.00272191	0.00731558	0.0127305	0.00248906	0.00436079	0.0101013	0.00609096	0.0223691	0.0141924	0.0194385	0.0348201	0.0330602	0.0351601		1.11237	1.06195	1.08716	1.1565	1.00499	1.08074	1.17261	1.02927	1.10094	1.1468	1.003	1.0749
0.481353	44_Ethene-Pentane_1.50_dimer.out	0.0540016	0.0329945	0.0434981	0.0664811	0.00431411	0.0353976	0.0754648	0.015644	0.0455544	0.0367474	0.0238572	0.00644509	0.0399296	0.0443701	0.0421499	0.0799567	0.0213089	0.0506328	0.0369846	0.040656	0.0388203	0.0320601	0.0430433	0.0373644	0.0407661	0.0429929	0.0411051	0.000251901	0.00108631	0.00106757	0.0134443	0.0190233	0.0180608		0.535354	0.514347	0.524851	0.547834	0.485667	0.51675	0.556817	0.496996	0.526907	0.5181	0.457495	0.487798
0.117369	44_Ethene-Pentane_2.00_dimer.out	0.0133654	0.0109414	0.0121534	0.0112155	0.00509859	0.00305847	0.0192528	0.0031543	0.0112035	0.0181955	0.00207733	0.0101364	0.00950547	0.0160468	0.0127762	0.0232714	0.00728075	0.0152761	0.00687073	0.0133414	0.0101061	0.00754112	0.0157457	0.0116268	0.00795714	0.0139876	0.010752	0.00842201	0.0148667	0.011597	0.00549369	0.0117143	0.00855405		0.130734	0.12831	0.129522	0.128584	0.11227	0.120427	0.136621	0.120523	0.128572	0.135564	0.119446	0.127505
0.991646	45_Ethyne-Pentane_0.90_dimer.out	0.0398719	0.129583	0.0448555	0.104991	0.435692	0.16535	0.206643	0.340522	0.0669397	0.256722	0.284928	0.0141031	0.0694688	0.00871619	0.0303763	0.257468	0.292937	0.0177344	0.102792	0.022482	0.0626369	0.0521877	0.0139746	0.0163478	0.108111	0.0288863	0.067152	0.0181475	0.0696339	0.0280104	0.0375645	0.0615108	0.0142093		1.03152	0.862064	0.946791	1.09664	0.555955	0.826296	1.19829	0.651124	0.924707	1.24837	0.706718	0.977543
1.50954	45_Ethyne-Pentane_0.95_dimer.out	0.0427151	0.0930966	0.0251907	0.11245	0.335826	0.111688	0.197462	0.251031	0.0267845	0.245468	0.204806	0.0203309	0.058742	0.0104504	0.0241458	0.239967	0.208633	0.0156671	0.0866101	0.017347	0.0519786	0.0437311	0.0151068	0.0118269	0.0913115	0.0230074	0.0559691	0.00954496	0.0611013	0.0279187	0.0240826	0.05249	0.0165467		1.55226	1.41644	1.48435	1.62199	1.17371	1.39785	1.707	1.25851	1.48276	1.75501	1.30473	1.52987
1.64553	45_Ethyne-Pentane_1.00_dimer.out	0.050506	0.0549883	0.00224114	0.131687	0.23772	0.0530161	0.196855	0.169504	0.0136754	0.229312	0.142696	0.0433081	0.0454454	0.0200922	0.0126766	0.229439	0.135396	0.0470212	0.0668084	0.00227002	0.0345392	0.03288	0.0240698	0.00224483	0.0708912	0.00719137	0.0380071	0.0121833	0.0494676	0.0200688	0.0245336	0.0382325	0.00855892		1.69604	1.59054	1.64329	1.77722	1.40781	1.59251	1.84238	1.47602	1.6592	1.87484	1.50283	1.68884
1.5887	45_Ethyne-Pentane_1.05_dimer.out	0.0468396	0.034642	0.00609878	0.151061	0.159058	0.00399841	0.193665	0.112314	0.0406754	0.209613	0.100819	0.0543972	0.0494241	0.0162824	0.0165708	0.214967	0.0889423	0.0630123	0.0633905	0.000959115	0.0312157	0.0424943	0.0187238	0.0104458	0.0654783	0.00196211	0.0331579	0.0330801	0.0288784	0.00140766	0.0426179	0.0183264	0.0112585		1.63553	1.55405	1.59479	1.73976	1.42964	1.5847	1.78236	1.47638	1.62937	1.79831	1.48788	1.64309
1.44438	45_Ethyne-Pentane_1.10_dimer.out	0.0448753	0.0184926	0.0131914	0.115732	0.133237	0.00875258	0.155818	0.092477	0.0316706	0.182297	0.0722626	0.0550173	0.0278625	0.030014	0.00107575	0.175861	0.0720967	0.0518822	0.0410034	0.016652	0.0121757	0.0195943	0.0326271	0.00793354	0.0437587	0.0133364	0.0145137	0.00072685	0.0521642	0.0268748	0.00651493	0.0471925	0.0217801		1.48925	1.42588	1.45757	1.56011	1.31114	1.43562	1.6002	1.3519	1.47605	1.62667	1.37212	1.49939
0.932426	45_Ethyne-Pentane_1.25_dimer.out	0.0680451	0.0320208	0.0500329	0.144221	0.00937333	0.0674239	0.157394	0.00336077	0.0803773	0.128849	0.0273997	0.0507245	0.00946496	0.0508112	0.0301381	0.16398	0.00972782	0.086854	0.0051467	0.0466368	0.0258917	0.00435967	0.0503415	0.0276206	0.00778054	0.047642	0.0272233	0.0197882	0.0171051	0.00262953	0.0320329	0.00016308	0.0172357		1.00047	0.964447	0.982459	1.07665	0.923053	0.99985	1.08982	0.935787	1.0128	1.06128	0.905027	0.983151
0.400234	45_Ethyne-Pentane_1.50_dimer.out	0.0776146	0.0625732	0.0700939	0.0938889	0.0345053	0.0641971	0.10238	0.043758	0.073069	0.0654224	0.00263624	0.0313931	0.0613776	0.0749091	0.0681433	0.106626	0.0483844	0.077505	0.058594	0.0718759	0.065235	0.0551061	0.0738688	0.0643553	0.0616404	0.0737157	0.0670578	0.0235033	0.0240721	0.0220897	0.0104573	0.00178232	0.00462093		0.477848	0.462807	0.470328	0.494123	0.434739	0.464431	0.502614	0.443992	0.473303	0.465656	0.397597	0.431627
0.0916728	45_Ethyne-Pentane_2.00_dimer.out	0.0179863	0.0172358	0.0176111	0.0151494	0.00563223	0.0103908	0.0199124	0.0112239	0.0155681	0.0251113	0.00915989	0.0171356	0.0167234	0.0211775	0.0189505	0.022294	0.0140197	0.0181568	0.015162	0.0193445	0.0172532	0.0152212	0.0209296	0.018045	0.0159588	0.019852	0.017741	0.0220512	0.0189159	0.0206825	0.0219334	0.0162262	0.0195329		0.109659	0.108909	0.109284	0.106822	0.097305	0.102064	0.111585	0.102897	0.107241	0.116784	0.100833	0.108808
3.65478	46_Peptide-Pentane_0.90_dimer.out	0.00569224	0.388657	0.197175	0.0826166	1.03926	0.478319	0.409097	0.715828	0.153366	0.499199	0.60058	0.050691	0.277642	0.174153	0.225898	0.572337	0.554115	0.00911124	0.384668	0.280178	0.332423	0.280373	0.172187	0.223916	0.375405	0.2767	0.327764	0.185306	0.0478689	0.112438	0.267312	0.106059	0.183092		3.64909	3.26612	3.45761	3.7374	2.61552	3.17646	4.06388	2.93895	3.50141	4.15398	3.0542	3.60409
4.115	46_Peptide-Pentane_0.95_dimer.out	0.00526937	0.32621	0.16047	0.10636	0.858733	0.376187	0.376461	0.591723	0.107631	0.463207	0.483265	0.0100291	0.238096	0.15213	0.195113	0.511511	0.458219	0.0266462	0.32664	0.23966	0.28315	0.243087	0.150959	0.195127	0.31774	0.236073	0.278571	0.149199	0.0332854	0.0872585	0.213655	0.0757985	0.141196		4.12027	3.78879	3.95453	4.22136	3.25627	3.73882	4.49146	3.52328	4.00737	4.57821	3.63174	4.10497
4.16179	46_Peptide-Pentane_1.00_dimer.out	0.0257824	0.259932	0.117075	0.14816	0.680003	0.265922	0.375554	0.454372	0.0394089	0.421695	0.394287	0.0137039	0.20354	0.13245	0.167995	0.489252	0.341557	0.0738475	0.278084	0.206416	0.24225	0.206724	0.131053	0.167028	0.271052	0.204031	0.238819	0.156255	0.0666113	0.109303	0.217987	0.115638	0.165002		4.18757	3.90186	4.04472	4.30995	3.48179	3.89587	4.53735	3.70742	4.12238	4.58349	3.7675	4.1755
3.97387	46_Peptide-Pentane_1.05_dimer.out	0.0456037	0.197242	0.0758193	0.171593	0.541391	0.184899	0.351641	0.364637	0.00649756	0.376082	0.326129	0.0249765	0.155045	0.087493	0.121269	0.441665	0.276259	0.0827031	0.214068	0.145436	0.179752	0.16129	0.0869941	0.122737	0.206815	0.142622	0.176066	0.129998	0.0452978	0.0864888	0.182234	0.087258	0.133976		4.01948	3.77663	3.89805	4.14547	3.43248	3.78897	4.32551	3.60924	3.96737	4.34995	3.64774	3.99885
3.66489	46_Peptide-Pentane_1.10_dimer.out	0.0626918	0.143207	0.0402576	0.183193	0.431325	0.124066	0.341098	0.271889	0.0346045	0.335045	0.268571	0.0332369	0.119841	0.0588383	0.0893397	0.420051	0.192172	0.11394	0.171605	0.111104	0.141355	0.128478	0.0590099	0.0926637	0.163814	0.107579	0.137186	0.126045	0.055202	0.090851	0.17949	0.10609	0.143344		3.72759	3.52169	3.62464	3.84809	3.23357	3.54083	4.00599	3.393	3.6995	3.99994	3.39632	3.69813
2.58551	46_Peptide-Pentane_1.25_dimer.out	0.115187	0.0142427	0.050472	0.237684	0.177194	0.0302449	0.323918	0.0883002	0.117809	0.232645	0.164901	0.0338721	0.0216647	0.0343119	0.00632358	0.367036	0.0438534	0.161591	0.0499339	0.00517104	0.0223815	0.0461682	0.0301336	0.00864755	0.0367267	0.0136157	0.0142834	0.115201	0.0496245	0.0864304	0.168816	0.11056	0.144461		2.7007	2.57127	2.63598	2.82319	2.40832	2.61576	2.90943	2.49721	2.70332	2.81816	2.42061	2.61938
1.17157	46_Peptide-Pentane_1.50_dimer.out	0.0837878	0.0252415	0.0545146	0.151581	0.0342163	0.0586822	0.189568	0.00348402	0.0965262	0.0975996	0.0809446	0.00832752	0.0144345	0.0395064	0.0269705	0.208562	0.0223342	0.115448	0.00198156	0.0271476	0.0145646	0.00243704	0.0368137	0.0169389	0.0105493	0.0321901	0.0196361	0.0798151	0.0530073	0.0704928	0.117806	0.100409	0.113713		1.25536	1.19681	1.22608	1.32315	1.13735	1.23025	1.36114	1.17505	1.2681	1.26917	1.09062	1.1799
0.282057	46_Peptide-Pentane_2.00_dimer.out	0.028396	0.00989484	0.0191454	0.0310976	0.0107628	0.0101674	0.0481027	0.00567795	0.0268903	0.0326064	0.00719714	0.0127046	0.0154755	0.0126596	0.0140675	0.0566053	0.0138983	0.0352518	0.00990093	0.00727001	0.00858547	0.0114979	0.0122533	0.0120455	0.0121188	0.00825026	0.0097626	0.00040521	0.00144844	0.0016083	0.0102829	0.012182	0.0120465		0.310453	0.291952	0.301202	0.313155	0.271294	0.292224	0.33016	0.287735	0.308947	0.314663	0.27486	0.294762
1.49324	47_Benzene-Benzene_TS_0.90_dimer.out	0.213182	0.165629	0.0237765	0.631294	0.571681	0.0298068	0.817078	0.397801	0.209638	0.767215	0.431104	0.168056	0.182754	0.0134082	0.0980809	0.90997	0.310862	0.299554	0.243657	0.0704088	0.157033	0.159246	0.00473864	0.0767212	0.249725	0.0806212	0.163397	0.233853	0.0498994	0.144032	0.308603	0.120723	0.217511		1.70642	1.32761	1.51701	2.12453	0.921555	1.52304	2.31031	1.09543	1.70287	2.26045	1.06213	1.66129
2.45197	47_Benzene-Benzene_TS_0.95_dimer.out	0.255921	0.0578836	0.0990189	0.63703	0.381251	0.12789	0.794387	0.229078	0.282655	0.680222	0.324008	0.178107	0.0971151	0.0543571	0.021379	0.873065	0.152991	0.360037	0.148699	0.00447212	0.0721136	0.077493	0.0617662	0.00329099	0.153708	0.00418257	0.0774605	0.214112	0.0496639	0.136909	0.297397	0.138951	0.224169		2.70789	2.39409	2.55099	3.089	2.07072	2.57986	3.24636	2.22289	2.73463	3.13219	2.12796	2.63008
2.76169	47_Benzene-Benzene_TS_1.00_dimer.out	0.240928	0.0272014	0.106863	0.609513	0.257696	0.175908	0.742389	0.129453	0.306468	0.605447	0.245408	0.180019	0.0878469	0.0398381	0.0240044	0.808827	0.0653311	0.371748	0.131406	0.00220222	0.0668041	0.0704344	0.0464899	0.00783769	0.136017	0.0101431	0.0717153	0.228185	0.0872214	0.163735	0.30977	0.177391	0.250713		3.00262	2.73449	2.86855	3.3712	2.50399	2.9376	3.50408	2.63223	3.06816	3.36713	2.51628	2.94171
2.73088	47_Benzene-Benzene_TS_1.05_dimer.out	0.242499	0.0185463	0.130523	0.543186	0.190231	0.176478	0.662803	0.0735891	0.294607	0.531908	0.182791	0.174559	0.0330671	0.0789535	0.0229432	0.722612	0.0152681	0.353672	0.0722795	0.0407162	0.0157817	0.0166276	0.0849459	0.0377748	0.0767763	0.0335851	0.0203153	0.167209	0.0407054	0.109716	0.242769	0.124268	0.190382		2.97338	2.74942	2.8614	3.27406	2.54065	2.90735	3.39368	2.65729	3.02548	3.26278	2.54809	2.90544
2.53572	47_Benzene-Benzene_TS_1.10_dimer.out	0.220901	0.0436036	0.132252	0.515883	0.116182	0.19985	0.610324	0.0183129	0.296005	0.474067	0.136457	0.168805	0.0344188	0.0841981	0.0248897	0.657544	0.0306219	0.344083	0.065378	0.0521148	0.0066316	0.0275464	0.0878872	0.0328673	0.0661652	0.0482563	0.00851475	0.174055	0.04526	0.115673	0.242851	0.126381	0.191634		2.75662	2.57932	2.66797	3.0516	2.41954	2.73557	3.14605	2.51741	2.83173	3.00979	2.39926	2.70453
1.73413	47_Benzene-Benzene_TS_1.25_dimer.out	0.235626	0.121724	0.178675	0.432094	0.0240315	0.228063	0.487932	0.0821528	0.285042	0.324543	0.0676814	0.128431	0.0702047	0.147668	0.108936	0.515851	0.111213	0.313532	0.0519001	0.128615	0.0902576	0.0593638	0.146849	0.103858	0.0581782	0.131101	0.0934691	0.097237	0.0165143	0.0641262	0.160912	0.0977583	0.137521		1.96976	1.85586	1.91281	2.16623	1.75817	1.9622	2.22207	1.81629	2.01918	2.05868	1.66645	1.86256
0.817747	47_Benzene-Benzene_TS_1.50_dimer.out	0.159632	0.105445	0.132539	0.260424	0.0693782	0.164901	0.296247	0.105829	0.201038	0.164765	0.0184716	0.0731466	0.0700635	0.105194	0.0876289	0.314158	0.124054	0.219106	0.0583201	0.0932452	0.0757827	0.0559611	0.103043	0.0793937	0.0655817	0.0974023	0.0800323	0.0646794	0.031009	0.0536962	0.112933	0.0945505	0.110224		0.977379	0.923192	0.950286	1.07817	0.887125	0.982648	1.11399	0.923575	1.01878	0.982511	0.799275	0.890893
0.222016	47_Benzene-Benzene_TS_2.00_dimer.out	0.0441664	0.028657	0.0364117	0.0707667	0.0123209	0.0415438	0.0879758	0.0282101	0.0580929	0.0724881	0.0136002	0.0430442	0.0154435	0.02895	0.0221967	0.0965803	0.0361547	0.0663675	0.00980204	0.0237413	0.0167717	0.011661	0.0284464	0.020098	0.0119366	0.0248646	0.0179797	0.000428304	0.0129411	0.00556721	0.0103704	0.00166828	0.00511547		0.266183	0.250673	0.258428	0.292783	0.234337	0.26356	0.309992	0.250226	0.280109	0.294504	0.235616	0.26506
[truncated: 152 more rows]

## Sheet: Composite with T1 and T0
100		TightPNO			TightPNO			TightPNO			TightPNO			c1	0.606029	0.925447	0.948199													c1	0.606029	0.925447	0.948199
[truncated: 540 more rows]
[truncated: 67 more columns]
