# Supplementary material for: S66x8 noncovalent interactions revisited: new benchmark and performance of composite localized coupled-cluster methods
Source: Royal Society of Chemistry journal article supplement (doi:10.1039/d2cp03938a), 2022-01-01
Supplement: d2cp03938a1.zip [file PNO LNO DLPNO vs. DF-CCSD(T) v2.xlsx]

## Sheet: haVTZ slice 1.0
	PNO DEFAULT										PNO TIGHT										DF-CCSD(T) CANONICAL						normalPNO/haVTZ					TightPNO/haVTZ					vTightPNO/haVTZ					vvTightPNO/haVTZ					Tight 1E-6
			dimer	monomerA	monomerA		monomerB	cpA	cpB				dimer	monomerA	monomerA		monomerB	cpA	cpB			dimer	monomerA	monomerB	cpA	cpB	dimer	monomerA	monomerB			dimer	monomerA	monomerB			dimer	monomerA	monomerB			dimer	monomerA	monomerB			dimer	monomerA	monomerB
4.946	01_Water-Water_1.00_dimer.out	-152.126	-152.691	-76.0601	-76.3415	-76.0603	-76.3416	-76.3418	-76.3417		01_Water-Water_1.00_dimer.out	-152.126	-152.691	-76.0601	-76.3415	-76.0603	-76.3415	-76.3418	-76.3417		01_Water-Water_1.00_dimer.out	-152.691	-76.3415	-76.3415	-76.3418	-76.3417	-152.691	-76.3414	-76.3415	-76.3417	-76.3417	-152.691	-76.3415	-76.3415	-76.3418	-76.3417	-152.691	-76.3415	-76.3415	-76.3418	-76.3417	-152.691	-76.3415	-76.3415	-76.3418	-76.3417	-152.691	-76.3416	-76.3416
5.627	02_Water-MeOH_1.00_dimer.out	-191.158	-191.911	-76.06	-76.3415	-115.092	-115.561	-115.561	-76.3417		02_Water-MeOH_1.00_dimer.out	-191.158	-191.912	-76.06	-76.3415	-115.092	-115.561	-115.561	-76.3418		02_Water-MeOH_1.00_dimer.out	-191.912	-76.3415	-115.561	-115.561	-76.3418	-191.911	-76.3414	-115.561	-115.561	-76.3418	-191.912	-76.3415	-115.561	-115.561	-76.3418	-191.912	-76.3415	-115.561	-115.561	-76.3418	-191.912	-76.3415	-115.561	-115.561	-76.3418	-191.912	-76.3416	-115.561
6.941	03_Water-MeNH2_1.00_dimer.out	-171.323	-172.057	-76.0598	-76.3415	-95.2553	-95.7046	-95.7048	-76.3417		03_Water-MeNH2_1.00_dimer.out	-171.323	-172.057	-76.0598	-76.3414	-95.2553	-95.7045	-95.7048	-76.3417		03_Water-MeNH2_1.00_dimer.out	-172.057	-76.3414	-95.7046	-95.7049	-76.3418	-172.057	-76.3414	-95.7045	-95.7048	-76.3417	-172.057	-76.3414	-95.7046	-95.7049	-76.3417	-172.057	-76.3414	-95.7046	-95.7049	-76.3418	-172.057	-76.3414	-95.7046	-95.7049	-76.3418	-172.057	-76.3415	-95.7047
8.128	04_Water-Peptide_1.00_dimer.out	-323.171	-324.494	-76.0598	-76.3415	-247.102	-248.14	-248.14	-76.3418		04_Water-Peptide_1.00_dimer.out	-323.171	-324.495	-76.0598	-76.3414	-247.102	-248.14	-248.141	-76.3419		04_Water-Peptide_1.00_dimer.out	-324.495	-76.3414	-248.141	-248.141	-76.3419	-324.494	-76.3414	-248.14	-248.14	-76.3418	-324.495	-76.3414	-248.14	-248.141	-76.3419	-324.495	-76.3414	-248.14	-248.141	-76.3419	-324.495	-76.3414	-248.14	-248.141	-76.3419	-324.494	-76.3415	-248.139
5.804	05_MeOH-MeOH_1.00_dimer.out	-230.189	-231.131	-115.092	-115.561	-115.092	-115.561	-115.561	-115.561		05_MeOH-MeOH_1.00_dimer.out	-230.189	-231.131	-115.092	-115.561	-115.092	-115.561	-115.561	-115.561		05_MeOH-MeOH_1.00_dimer.out	-231.132	-115.561	-115.561	-115.562	-115.561	-231.131	-115.561	-115.561	-115.561	-115.561	-231.131	-115.561	-115.561	-115.561	-115.561	-231.132	-115.561	-115.561	-115.562	-115.561	-231.132	-115.561	-115.561	-115.562	-115.561	-231.131	-115.561	-115.561
7.601	06_MeOH-MeNH2_1.00_dimer.out	-210.353	-211.277	-115.091	-115.561	-95.2553	-95.7046	-95.7049	-115.561		06_MeOH-MeNH2_1.00_dimer.out	-210.353	-211.277	-115.091	-115.561	-95.2553	-95.7045	-95.7049	-115.561		06_MeOH-MeNH2_1.00_dimer.out	-211.278	-115.561	-95.7046	-95.705	-115.561	-211.277	-115.561	-95.7045	-95.7049	-115.561	-211.278	-115.561	-95.7046	-95.705	-115.561	-211.278	-115.561	-95.7046	-95.705	-115.561	-211.278	-115.561	-95.7046	-95.705	-115.561	-211.277	-115.561	-95.7047
8.289	07_MeOH-Peptide_1.00_dimer.out	-362.202	-363.714	-115.091	-115.561	-247.102	-248.14	-248.14	-115.561		07_MeOH-Peptide_1.00_dimer.out	-362.202	-363.714	-115.091	-115.561	-247.102	-248.14	-248.141	-115.561		07_MeOH-Peptide_1.00_dimer.out	-363.715	-115.561	-248.141	-248.141	-115.561	-363.714	-115.561	-248.14	-248.14	-115.561	-363.714	-115.561	-248.14	-248.141	-115.561	-363.715	-115.561	-248.14	-248.141	-115.561	-363.715	-115.561	-248.141	-248.141	-115.561	-363.713	-115.561	-248.139
5.045	08_MeOH-Water_1.00_dimer.out	-191.158	-191.91	-115.092	-115.561	-76.0603	-76.3416	-76.3418	-115.561		08_MeOH-Water_1.00_dimer.out	-191.158	-191.911	-115.092	-115.561	-76.0603	-76.3415	-76.3419	-115.561		08_MeOH-Water_1.00_dimer.out	-191.911	-115.561	-76.3415	-76.3419	-115.561	-191.91	-115.561	-76.3415	-76.3418	-115.561	-191.911	-115.561	-76.3415	-76.3418	-115.561	-191.911	-115.561	-76.3415	-76.3419	-115.561	-191.911	-115.561	-76.3415	-76.3419	-115.561	-191.911	-115.561	-76.3416
3.037	09_MeNH2-MeOH_1.00_dimer.out	-210.349	-211.27	-95.2552	-95.7046	-115.092	-115.561	-115.561	-95.7046		09_MeNH2-MeOH_1.00_dimer.out	-210.349	-211.27	-95.2552	-95.7045	-115.092	-115.561	-115.561	-95.7046		09_MeNH2-MeOH_1.00_dimer.out	-211.271	-95.7045	-115.561	-115.561	-95.7047	-211.271	-95.7045	-115.561	-115.561	-95.7046	-211.271	-95.7045	-115.561	-115.561	-95.7047	-211.271	-95.7045	-115.561	-115.561	-95.7047	-211.271	-95.7045	-115.561	-115.561	-95.7047	-211.271	-95.7046	-115.561
4.153	10_MeNH2-MeNH2_1.00_dimer.out	-190.512	-191.416	-95.2551	-95.7046	-95.2552	-95.7046	-95.7047	-95.7047		10_MeNH2-MeNH2_1.00_dimer.out	-190.512	-191.416	-95.2551	-95.7045	-95.2552	-95.7045	-95.7048	-95.7047		10_MeNH2-MeNH2_1.00_dimer.out	-191.416	-95.7045	-95.7046	-95.7049	-95.7048	-191.416	-95.7045	-95.7045	-95.7048	-95.7047	-191.416	-95.7045	-95.7046	-95.7048	-95.7047	-191.416	-95.7045	-95.7046	-95.7049	-95.7048	-191.416	-95.7045	-95.7046	-95.7048	-95.7048	-191.416	-95.7046	-95.7047
5.397	11_MeNH2-Peptide_1.00_dimer.out	-342.361	-343.853	-95.2551	-95.7045	-247.103	-248.14	-248.14	-95.7047		11_MeNH2-Peptide_1.00_dimer.out	-342.361	-343.854	-95.2551	-95.7045	-247.103	-248.14	-248.141	-95.7047		11_MeNH2-Peptide_1.00_dimer.out	-343.854	-95.7045	-248.141	-248.141	-95.7049	-343.854	-95.7045	-248.14	-248.141	-95.7047	-343.854	-95.7045	-248.141	-248.141	-95.7048	-343.854	-95.7045	-248.141	-248.141	-95.7048	-343.854	-95.7045	-248.141	-248.141	-95.7048	-343.853	-95.7046	-248.14
7.312	12_MeNH2-Water_1.00_dimer.out	-171.323	-172.058	-95.2552	-95.7046	-76.0597	-76.3414	-76.3417	-95.7049		12_MeNH2-Water_1.00_dimer.out	-171.323	-172.058	-95.2552	-95.7045	-76.0597	-76.3414	-76.3418	-95.7049		12_MeNH2-Water_1.00_dimer.out	-172.058	-95.7046	-76.3414	-76.3418	-95.7049	-172.058	-95.7045	-76.3414	-76.3417	-95.7049	-172.058	-95.7046	-76.3414	-76.3417	-95.7049	-172.058	-95.7046	-76.3414	-76.3418	-95.7049	-172.058	-95.7046	-76.3414	-76.3418	-95.7049	-172.058	-95.7047	-76.3415
6.22	13_Peptide-MeOH_1.00_dimer.out	-362.2	-363.711	-247.103	-248.14	-115.092	-115.561	-115.561	-248.14		13_Peptide-MeOH_1.00_dimer.out	-362.2	-363.711	-247.103	-248.14	-115.092	-115.561	-115.561	-248.141		13_Peptide-MeOH_1.00_dimer.out	-363.712	-248.141	-115.561	-115.562	-248.141	-363.711	-248.14	-115.561	-115.561	-248.14	-363.712	-248.14	-115.561	-115.562	-248.141	-363.712	-248.141	-115.561	-115.562	-248.141	-363.712	-248.141	-115.561	-115.562	-248.141	-363.711	-248.14	-115.561
7.5	14_Peptide-MeNH2_1.00_dimer.out	-342.363	-343.856	-247.102	-248.14	-95.2552	-95.7046	-95.7049	-248.14		14_Peptide-MeNH2_1.00_dimer.out	-342.363	-343.857	-247.102	-248.14	-95.2552	-95.7045	-95.7049	-248.141		14_Peptide-MeNH2_1.00_dimer.out	-343.857	-248.14	-95.7046	-95.7051	-248.141	-343.857	-248.14	-95.7045	-95.705	-248.14	-343.857	-248.14	-95.7046	-95.705	-248.141	-343.857	-248.14	-95.7046	-95.705	-248.141	-343.857	-248.14	-95.7046	-95.705	-248.141	-343.856	-248.139	-95.7047
8.659	15_Peptide-Peptide_1.00_dimer.out	-494.212	-496.293	-247.102	-248.14	-247.102	-248.14	-248.14	-248.14		15_Peptide-Peptide_1.00_dimer.out	-494.212	-496.294	-247.102	-248.14	-247.102	-248.14	-248.141	-248.141		15_Peptide-Peptide_1.00_dimer.out	-496.295	-248.14	-248.14	-248.141	-248.141	-496.294	-248.14	-248.14	-248.14	-248.14	-496.295	-248.14	-248.14	-248.141	-248.141	-496.295	-248.14	-248.14	-248.141	-248.141	-496.295	-248.14	-248.14	-248.141	-248.141	-496.292	-248.139	-248.139
5.15	16_Peptide-Water_1.00_dimer.out	-323.168	-324.49	-247.102	-248.14	-76.0603	-76.3416	-76.3418	-248.14		16_Peptide-Water_1.00_dimer.out	-323.168	-324.49	-247.102	-248.14	-76.0603	-76.3415	-76.3418	-248.14		16_Peptide-Water_1.00_dimer.out	-324.491	-248.141	-76.3415	-76.3419	-248.141	-324.49	-248.14	-76.3415	-76.3419	-248.14	-324.49	-248.14	-76.3415	-76.3419	-248.141	-324.49	-248.14	-76.3415	-76.3419	-248.141	-324.491	-248.141	-76.3415	-76.3419	-248.141	-324.489	-248.139	-76.3416
17.405	17_Uracil-Uracil_BP_1.00_dimer.out	-825.266	-828.435	-412.622	-414.204	-412.623	-414.204	-414.205	-414.204		17_Uracil-Uracil_BP_1.00_dimer.out	-825.266	-828.437	-412.622	-414.205	-412.623	-414.205	-414.206	-414.206		17_Uracil-Uracil_BP_1.00_dimer.out	-828.439	-414.205	-414.206	-414.207	-414.206	-828.436	-414.204	-414.204	-414.205	-414.205	-828.438	-414.205	-414.205	-414.206	-414.206	-828.439	-414.205	-414.205	-414.206	-414.206	-828.439	-414.205	-414.206	-414.206	-414.206	-828.432	-414.202	-414.202
6.879	18_Water-Pyridine_1.00_dimer.out	-322.846	-324.199	-76.0598	-76.3415	-246.779	-247.846	-247.847	-76.3418		18_Water-Pyridine_1.00_dimer.out	-322.846	-324.199	-76.0598	-76.3414	-246.779	-247.847	-247.847	-76.3419		18_Water-Pyridine_1.00_dimer.out	-324.2	-76.3414	-247.847	-247.848	-76.342	-324.2	-76.3414	-247.847	-247.848	-76.3418	-324.2	-76.3414	-247.847	-247.848	-76.3419	-324.2	-76.3414	-247.847	-247.848	-76.3419	-324.2	-76.3414	-247.847	-247.848	-76.3419	-324.199	-76.3415	-247.846
7.448	19_MeOH-Pyridine_1.00_dimer.out	-361.877	-363.419	-115.091	-115.561	-246.779	-247.846	-247.847	-115.561		19_MeOH-Pyridine_1.00_dimer.out	-361.877	-363.419	-115.091	-115.561	-246.779	-247.847	-247.847	-115.561		19_MeOH-Pyridine_1.00_dimer.out	-363.42	-115.561	-247.847	-247.848	-115.561	-363.42	-115.561	-247.847	-247.848	-115.561	-363.42	-115.561	-247.847	-247.848	-115.561	-363.42	-115.561	-247.847	-247.848	-115.561	-363.42	-115.561	-247.847	-247.848	-115.561	-363.419	-115.561	-247.846
19.397	20_AcOH-AcOH_1.00_dimer.out	-455.83	-457.566	-227.902	-228.768	-227.902	-228.768	-228.769	-228.769		20_AcOH-AcOH_1.00_dimer.out	-455.83	-457.567	-227.902	-228.768	-227.902	-228.768	-228.769	-228.769		20_AcOH-AcOH_1.00_dimer.out	-457.568	-228.768	-228.768	-228.769	-228.769	-457.566	-228.768	-228.768	-228.769	-228.769	-457.567	-228.768	-228.768	-228.769	-228.769	-457.568	-228.768	-228.768	-228.769	-228.769	-457.568	-228.768	-228.768	-228.769	-228.769	-457.565	-228.767	-228.767
16.472	21_AcNH2-AcNH2_1.00_dimer.out	-416.142	-417.837	-208.061	-208.906	-208.061	-208.906	-208.906	-208.906		21_AcNH2-AcNH2_1.00_dimer.out	-416.142	-417.838	-208.061	-208.906	-208.061	-208.906	-208.906	-208.906		21_AcNH2-AcNH2_1.00_dimer.out	-417.838	-208.906	-208.906	-208.907	-208.907	-417.837	-208.906	-208.906	-208.906	-208.906	-417.838	-208.906	-208.906	-208.906	-208.906	-417.838	-208.906	-208.906	-208.907	-208.907	-417.838	-208.906	-208.906	-208.907	-208.907	-417.836	-208.905	-208.905
19.759	22_AcOH-Uracil_1.00_dimer.out	-640.55	-643.002	-227.902	-228.768	-412.622	-414.204	-414.204	-228.769		22_AcOH-Uracil_1.00_dimer.out	-640.55	-643.004	-227.902	-228.768	-412.622	-414.205	-414.205	-228.769		22_AcOH-Uracil_1.00_dimer.out	-643.005	-228.768	-414.205	-414.206	-228.769	-643.003	-228.768	-414.204	-414.205	-228.769	-643.004	-228.768	-414.205	-414.206	-228.769	-643.005	-228.768	-414.205	-414.206	-228.769	-643.005	-228.768	-414.205	-414.206	-228.769	-643	-228.767	-414.202
19.432	23_AcNH2-Uracil_1.00_dimer.out	-620.708	-623.139	-208.061	-208.906	-412.622	-414.204	-414.204	-208.906		23_AcNH2-Uracil_1.00_dimer.out	-620.708	-623.141	-208.061	-208.906	-412.622	-414.204	-414.205	-208.906		23_AcNH2-Uracil_1.00_dimer.out	-623.142	-208.906	-414.205	-414.206	-208.907	-623.14	-208.905	-414.204	-414.205	-208.906	-623.141	-208.906	-414.205	-414.205	-208.907	-623.142	-208.906	-414.205	-414.206	-208.907	-623.142	-208.906	-414.205	-414.206	-208.907	-623.137	-208.905	-414.202
2.521	24_Benzene-Benzene_pi-pi_1.00_dimer.out	-461.554	-463.64	-230.781	-231.818	-230.781	-231.818	-231.818	-231.818		24_Benzene-Benzene_pi-pi_1.00_dimer.out	-461.554	-463.641	-230.781	-231.818	-230.781	-231.818	-231.819	-231.819		24_Benzene-Benzene_pi-pi_1.00_dimer.out	-463.643	-231.819	-231.819	-231.82	-231.82	-463.644	-231.819	-231.819	-231.82	-231.82	-463.644	-231.819	-231.819	-231.82	-231.82	-463.643	-231.819	-231.819	-231.82	-231.82	-463.643	-231.819	-231.819	-231.82	-231.82	-463.642	-231.818	-231.818
3.61	25_Pyridine-Pyridine_pi-pi_1.00_dimer.out	-493.55	-495.699	-246.778	-247.847	-246.778	-247.847	-247.847	-247.847		25_Pyridine-Pyridine_pi-pi_1.00_dimer.out	-493.55	-495.7	-246.778	-247.847	-246.778	-247.847	-247.848	-247.848		25_Pyridine-Pyridine_pi-pi_1.00_dimer.out	-495.702	-247.847	-247.847	-247.848	-247.848	-495.703	-247.847	-247.847	-247.848	-247.848	-495.703	-247.847	-247.847	-247.848	-247.848	-495.702	-247.847	-247.847	-247.848	-247.848	-495.702	-247.847	-247.847	-247.848	-247.848	-495.7	-247.846	-247.846
9.619	26_Uracil-Uracil_pi-pi_1.00_dimer.out	-825.248	-828.424	-412.623	-414.204	-412.623	-414.204	-414.205	-414.205		26_Uracil-Uracil_pi-pi_1.00_dimer.out	-825.248	-828.428	-412.623	-414.205	-412.623	-414.205	-414.207	-414.207		26_Uracil-Uracil_pi-pi_1.00_dimer.out	-828.43	-414.206	-414.206	-414.208	-414.208	-828.429	-414.205	-414.205	-414.207	-414.207	-828.429	-414.205	-414.205	-414.207	-414.207	-828.43	-414.206	-414.206	-414.207	-414.207	-828.43	-414.206	-414.206	-414.208	-414.208	-828.422	-414.203	-414.203
3.156	27_Benzene-Pyridine_pi-pi_1.00_dimer.out	-477.552	-479.67	-230.781	-231.818	-246.778	-247.847	-247.847	-231.818		27_Benzene-Pyridine_pi-pi_1.00_dimer.out	-477.552	-479.671	-230.781	-231.818	-246.778	-247.847	-247.848	-231.819		27_Benzene-Pyridine_pi-pi_1.00_dimer.out	-479.673	-231.819	-247.847	-247.848	-231.82	-479.674	-231.819	-247.847	-247.848	-231.82	-479.673	-231.819	-247.847	-247.848	-231.82	-479.673	-231.819	-247.847	-247.848	-231.82	-479.673	-231.819	-247.847	-247.848	-231.82	-479.671	-231.818	-247.846
5.465	28_Benzene-Uracil_pi-pi_1.00_dimer.out	-643.4	-646.032	-230.781	-231.818	-412.624	-414.205	-414.205	-231.819		28_Benzene-Uracil_pi-pi_1.00_dimer.out	-643.4	-646.034	-230.781	-231.818	-412.624	-414.206	-414.207	-231.819		28_Benzene-Uracil_pi-pi_1.00_dimer.out	-646.036	-231.819	-414.206	-414.208	-231.82	-646.036	-231.819	-414.205	-414.207	-231.82	-646.036	-231.819	-414.206	-414.207	-231.82	-646.036	-231.819	-414.206	-414.207	-231.82	-646.036	-231.819	-414.206	-414.208	-231.82	-646.032	-231.818	-414.203
6.576	29_Pyridine-Uracil_pi-pi_1.00_dimer.out	-659.399	-662.062	-246.778	-247.847	-412.624	-414.205	-414.205	-247.847		29_Pyridine-Uracil_pi-pi_1.00_dimer.out	-659.399	-662.064	-246.778	-247.847	-412.624	-414.206	-414.207	-247.848		29_Pyridine-Uracil_pi-pi_1.00_dimer.out	-662.066	-247.847	-414.206	-414.208	-247.849	-662.066	-247.847	-414.205	-414.206	-247.849	-662.066	-247.847	-414.206	-414.207	-247.849	-662.066	-247.847	-414.206	-414.207	-247.849	-662.066	-247.847	-414.206	-414.207	-247.849	-662.061	-247.846	-414.203
1.269	30_Benzene-Ethene_1.00_dimer.out	-308.841	-310.263	-230.781	-231.818	-78.0646	-78.4427	-78.4429	-231.818		30_Benzene-Ethene_1.00_dimer.out	-308.841	-310.263	-230.781	-231.818	-78.0646	-78.4426	-78.443	-231.819		30_Benzene-Ethene_1.00_dimer.out	-310.264	-231.819	-78.4427	-78.4431	-231.819	-310.265	-231.819	-78.4427	-78.4432	-231.819	-310.264	-231.819	-78.4427	-78.4431	-231.819	-310.264	-231.819	-78.4427	-78.4431	-231.819	-310.264	-231.819	-78.4427	-78.4431	-231.819	-310.263	-231.818	-78.4427
3.257	31_Uracil-Ethene_1.00_dimer.out	-490.687	-492.653	-412.624	-414.205	-78.0645	-78.4427	-78.4429	-414.205		31_Uracil-Ethene_1.00_dimer.out	-490.687	-492.654	-412.624	-414.206	-78.0645	-78.4426	-78.4431	-414.206		31_Uracil-Ethene_1.00_dimer.out	-492.655	-414.206	-78.4427	-78.4432	-414.207	-492.654	-414.205	-78.4428	-78.4433	-414.206	-492.655	-414.206	-78.4427	-78.4433	-414.206	-492.655	-414.206	-78.4427	-78.4432	-414.207	-492.655	-414.206	-78.4427	-78.4432	-414.207	-492.652	-414.203	-78.4428
3.587	32_Uracil-Ethyne_1.00_dimer.out	-489.473	-491.402	-412.624	-414.205	-76.8487	-77.1915	-77.1918	-414.205		32_Uracil-Ethyne_1.00_dimer.out	-489.473	-491.404	-412.624	-414.206	-76.8487	-77.1915	-77.192	-414.206		32_Uracil-Ethyne_1.00_dimer.out	-491.404	-414.206	-77.1915	-77.192	-414.207	-491.404	-414.205	-77.1915	-77.192	-414.206	-491.404	-414.206	-77.1915	-77.1921	-414.206	-491.404	-414.206	-77.1915	-77.192	-414.207	-491.404	-414.206	-77.1915	-77.192	-414.207	-491.401	-414.203	-77.1917
1.721	33_Pyridine-Ethene_1.00_dimer.out	-324.838	-326.292	-246.779	-247.847	-78.0645	-78.4427	-78.4429	-247.847		33_Pyridine-Ethene_1.00_dimer.out	-324.838	-326.293	-246.779	-247.847	-78.0645	-78.4426	-78.443	-247.847		33_Pyridine-Ethene_1.00_dimer.out	-326.293	-247.847	-78.4427	-78.4431	-247.848	-326.294	-247.847	-78.4428	-78.4432	-247.848	-326.294	-247.847	-78.4427	-78.4432	-247.848	-326.294	-247.847	-78.4427	-78.4431	-247.848	-326.294	-247.847	-78.4427	-78.4431	-247.848	-326.292	-247.846	-78.4427
3.723	34_Pentane-Pentane_1.00_dimer.out	-392.803	-394.813	-196.404	-197.404	-196.404	-197.404	-197.404	-197.404		34_Pentane-Pentane_1.00_dimer.out	-392.803	-394.813	-196.404	-197.404	-196.404	-197.404	-197.404	-197.404		34_Pentane-Pentane_1.00_dimer.out	-394.814	-197.404	-197.404	-197.405	-197.405	-394.814	-197.404	-197.404	-197.404	-197.404	-394.814	-197.404	-197.404	-197.404	-197.404	-394.814	-197.404	-197.404	-197.404	-197.404	-394.814	-197.404	-197.404	-197.404	-197.404	-394.813	-197.404	-197.404
2.58	35_Neopentane-Pentane_1.00_dimer.out	-392.805	-394.817	-196.404	-197.404	-196.404	-197.41	-197.41	-197.404		35_Neopentane-Pentane_1.00_dimer.out	-392.805	-394.818	-196.404	-197.404	-196.404	-197.41	-197.41	-197.404		35_Neopentane-Pentane_1.00_dimer.out	-394.819	-197.404	-197.41	-197.411	-197.404	-394.818	-197.404	-197.41	-197.41	-197.404	-394.819	-197.404	-197.41	-197.411	-197.404	-394.819	-197.404	-197.41	-197.411	-197.404	-394.819	-197.404	-197.41	-197.411	-197.404	-394.818	-197.404	-197.41
1.742	36_Neopentane-Neopentane_1.00_dimer.out	-392.806	-394.822	-196.404	-197.41	-196.404	-197.41	-197.41	-197.41		36_Neopentane-Neopentane_1.00_dimer.out	-392.806	-394.823	-196.404	-197.41	-196.404	-197.41	-197.41	-197.41		36_Neopentane-Neopentane_1.00_dimer.out	-394.824	-197.41	-197.41	-197.411	-197.411	-394.823	-197.41	-197.41	-197.41	-197.41	-394.824	-197.41	-197.41	-197.41	-197.41	-394.824	-197.41	-197.41	-197.411	-197.411	-394.824	-197.41	-197.41	-197.411	-197.411	-394.823	-197.41	-197.41
2.373	37_Cyclopentane-Neopentane_1.00_dimer.out	-391.63	-393.608	-195.23	-196.195	-196.404	-197.41	-197.41	-196.195		37_Cyclopentane-Neopentane_1.00_dimer.out	-391.63	-393.609	-195.23	-196.195	-196.404	-197.41	-197.41	-196.195		37_Cyclopentane-Neopentane_1.00_dimer.out	-393.61	-196.195	-197.41	-197.411	-196.196	-393.61	-196.195	-197.41	-197.411	-196.195	-393.61	-196.195	-197.41	-197.411	-196.195	-393.61	-196.195	-197.41	-197.411	-196.196	-393.61	-196.195	-197.41	-197.411	-196.196	-393.609	-196.195	-197.41
2.956	38_Cyclopentane-Cyclopentane_1.00_dimer.out	-390.456	-392.394	-195.23	-196.195	-195.23	-196.195	-196.195	-196.195		38_Cyclopentane-Cyclopentane_1.00_dimer.out	-390.456	-392.395	-195.23	-196.195	-195.23	-196.195	-196.195	-196.195		38_Cyclopentane-Cyclopentane_1.00_dimer.out	-392.396	-196.195	-196.195	-196.196	-196.196	-392.396	-196.195	-196.195	-196.196	-196.196	-392.396	-196.195	-196.195	-196.196	-196.196	-392.396	-196.195	-196.195	-196.196	-196.196	-392.396	-196.195	-196.195	-196.196	-196.196	-392.395	-196.195	-196.195
3.438	39_Benzene-Cyclopentane_1.00_dimer.out	-426.006	-428.018	-230.781	-231.818	-195.23	-196.195	-196.195	-231.818		39_Benzene-Cyclopentane_1.00_dimer.out	-426.006	-428.019	-230.781	-231.818	-195.23	-196.195	-196.195	-231.819		39_Benzene-Cyclopentane_1.00_dimer.out	-428.021	-231.819	-196.195	-196.196	-231.82	-428.021	-231.819	-196.195	-196.196	-231.82	-428.021	-231.819	-196.195	-196.196	-231.82	-428.021	-231.819	-196.195	-196.196	-231.82	-428.021	-231.819	-196.195	-196.196	-231.82	-428.019	-231.818	-196.195
2.791	40_Benzene-Neopentane_1.00_dimer.out	-427.182	-429.232	-230.781	-231.818	-196.404	-197.41	-197.41	-231.818		40_Benzene-Neopentane_1.00_dimer.out	-427.182	-429.233	-230.781	-231.818	-196.404	-197.41	-197.41	-231.819		40_Benzene-Neopentane_1.00_dimer.out	-429.234	-231.819	-197.41	-197.411	-231.819	-429.235	-231.819	-197.41	-197.411	-231.819	-429.235	-231.819	-197.41	-197.411	-231.82	-429.235	-231.819	-197.41	-197.411	-231.82	-429.234	-231.819	-197.41	-197.411	-231.819	-429.233	-231.818	-197.41
4.724	41_Uracil-Pentane_1.00_dimer.out	-609.024	-611.616	-412.624	-414.205	-196.404	-197.403	-197.404	-414.205		41_Uracil-Pentane_1.00_dimer.out	-609.024	-611.618	-412.624	-414.206	-196.404	-197.404	-197.404	-414.207		41_Uracil-Pentane_1.00_dimer.out	-611.619	-414.206	-197.404	-197.405	-414.208	-611.618	-414.205	-197.404	-197.404	-414.206	-611.619	-414.206	-197.404	-197.404	-414.207	-611.619	-414.206	-197.404	-197.405	-414.207	-611.619	-414.206	-197.404	-197.405	-414.207	-611.615	-414.203	-197.404
4.019	42_Uracil-Cyclopentane_1.00_dimer.out	-607.85	-610.406	-412.624	-414.205	-195.23	-196.195	-196.195	-414.205		42_Uracil-Cyclopentane_1.00_dimer.out	-607.85	-610.408	-412.624	-414.206	-195.23	-196.195	-196.195	-414.206		42_Uracil-Cyclopentane_1.00_dimer.out	-610.41	-414.206	-196.195	-196.196	-414.208	-610.409	-414.205	-196.195	-196.196	-414.206	-610.409	-414.206	-196.195	-196.196	-414.207	-610.409	-414.206	-196.195	-196.196	-414.207	-610.41	-414.206	-196.195	-196.196	-414.207	-610.405	-414.203	-196.195
3.613	43_Uracil-Neopentane_1.00_dimer.out	-609.026	-611.62	-412.624	-414.205	-196.404	-197.41	-197.41	-414.205		43_Uracil-Neopentane_1.00_dimer.out	-609.026	-611.622	-412.624	-414.206	-196.404	-197.41	-197.41	-414.206		43_Uracil-Neopentane_1.00_dimer.out	-611.624	-414.206	-197.41	-197.411	-414.207	-611.622	-414.205	-197.41	-197.411	-414.206	-611.623	-414.206	-197.41	-197.411	-414.207	-611.623	-414.206	-197.41	-197.411	-414.207	-611.624	-414.206	-197.41	-197.411	-414.207	-611.62	-414.203	-197.41
1.943	44_Ethene-Pentane_1.00_dimer.out	-274.466	-275.849	-78.0645	-78.4427	-196.404	-197.404	-197.404	-78.4428		44_Ethene-Pentane_1.00_dimer.out	-274.466	-275.849	-78.0645	-78.4426	-196.404	-197.404	-197.404	-78.4428		44_Ethene-Pentane_1.00_dimer.out	-275.85	-78.4427	-197.404	-197.404	-78.443	-275.85	-78.4428	-197.404	-197.404	-78.443	-275.85	-78.4427	-197.404	-197.404	-78.4429	-275.85	-78.4427	-197.404	-197.404	-78.4429	-275.85	-78.4427	-197.404	-197.404	-78.4429	-275.85	-78.4427	-197.404
1.646	45_Ethyne-Pentane_1.00_dimer.out	-273.251	-274.598	-76.8489	-77.1915	-196.404	-197.403	-197.403	-77.1917		45_Ethyne-Pentane_1.00_dimer.out	-273.251	-274.598	-76.8489	-77.1915	-196.404	-197.404	-197.404	-77.1918		45_Ethyne-Pentane_1.00_dimer.out	-274.598	-77.1915	-197.404	-197.404	-77.1919	-274.598	-77.1916	-197.404	-197.404	-77.1919	-274.598	-77.1915	-197.404	-197.404	-77.1918	-274.598	-77.1915	-197.404	-197.404	-77.1918	-274.598	-77.1915	-197.404	-197.404	-77.1918	-274.598	-77.1917	-197.404
4.162	46_Peptide-Pentane_1.00_dimer.out	-443.503	-445.55	-247.102	-248.14	-196.404	-197.403	-197.404	-248.14		46_Peptide-Pentane_1.00_dimer.out	-443.503	-445.551	-247.102	-248.14	-196.404	-197.404	-197.404	-248.141		46_Peptide-Pentane_1.00_dimer.out	-445.552	-248.141	-197.404	-197.405	-248.141	-445.551	-248.14	-197.404	-197.404	-248.141	-445.552	-248.14	-197.404	-197.404	-248.141	-445.552	-248.141	-197.404	-197.404	-248.141	-445.552	-248.141	-197.404	-197.404	-248.141	-445.55	-248.139	-197.404
2.762	47_Benzene-Benzene_TS_1.00_dimer.out	-461.56	-463.64	-230.781	-231.818	-230.781	-231.818	-231.818	-231.818		47_Benzene-Benzene_TS_1.00_dimer.out	-461.56	-463.641	-230.781	-231.818	-230.781	-231.818	-231.818	-231.819		47_Benzene-Benzene_TS_1.00_dimer.out	-463.643	-231.819	-231.819	-231.819	-231.82	-463.643	-231.819	-231.819	-231.819	-231.82	-463.643	-231.819	-231.819	-231.819	-231.82	-463.643	-231.819	-231.819	-231.819	-231.82	-463.643	-231.819	-231.819	-231.819	-231.82	-463.642	-231.818	-231.818
3.44	48_Pyridine-Pyridine_TS_1.00_dimer.out	-493.555	-495.699	-246.778	-247.847	-246.778	-247.847	-247.847	-247.847		48_Pyridine-Pyridine_TS_1.00_dimer.out	-493.555	-495.7	-246.778	-247.847	-246.778	-247.847	-247.847	-247.847		48_Pyridine-Pyridine_TS_1.00_dimer.out	-495.701	-247.847	-247.847	-247.848	-247.848	-495.701	-247.847	-247.847	-247.848	-247.848	-495.701	-247.847	-247.847	-247.848	-247.848	-495.701	-247.847	-247.847	-247.848	-247.848	-495.701	-247.847	-247.847	-247.848	-247.848	-495.699	-247.846	-247.846
3.226	49_Benzene-Pyridine_TS_1.00_dimer.out	-477.558	-479.67	-230.781	-231.818	-246.778	-247.847	-247.847	-231.818		49_Benzene-Pyridine_TS_1.00_dimer.out	-477.558	-479.671	-230.781	-231.818	-246.778	-247.847	-247.847	-231.819		49_Benzene-Pyridine_TS_1.00_dimer.out	-479.672	-231.819	-247.847	-247.848	-231.82	-479.673	-231.819	-247.847	-247.848	-231.82	-479.673	-231.819	-247.847	-247.848	-231.82	-479.672	-231.819	-247.847	-247.848	-231.82	-479.672	-231.819	-247.847	-247.848	-231.82	-479.671	-231.818	-247.846
2.81	50_Benzene-Ethyne_CH-pi_1.00_dimer.out	-307.63	-309.014	-230.781	-231.818	-76.8488	-77.1915	-77.1917	-231.818		50_Benzene-Ethyne_CH-pi_1.00_dimer.out	-307.63	-309.015	-230.781	-231.818	-76.8488	-77.1915	-77.1918	-231.819		50_Benzene-Ethyne_CH-pi_1.00_dimer.out	-309.015	-231.819	-77.1915	-77.1918	-231.819	-309.016	-231.819	-77.1915	-77.1919	-231.82	-309.016	-231.819	-77.1915	-77.1918	-231.82	-309.015	-231.819	-77.1915	-77.1918	-231.819	-309.015	-231.819	-77.1915	-77.1918	-231.819	-309.015	-231.818	-77.1917
1.489	51_Ethyne-Ethyne_TS_1.00_dimer.out	-153.699	-154.385	-76.8489	-77.1915	-76.8488	-77.1915	-77.1916	-77.1917		51_Ethyne-Ethyne_TS_1.00_dimer.out	-153.699	-154.386	-76.8489	-77.1915	-76.8488	-77.1916	-77.1916	-77.1917		51_Ethyne-Ethyne_TS_1.00_dimer.out	-154.386	-77.1915	-77.1915	-77.1916	-77.1917	-154.386	-77.1916	-77.1916	-77.1917	-77.1917	-154.386	-77.1915	-77.1915	-77.1916	-77.1917	-154.386	-77.1915	-77.1915	-77.1916	-77.1917	-154.386	-77.1915	-77.1915	-77.1916	-77.1917	-154.386	-77.1917	-77.1917
4.655	52_Benzene-AcOH_OH-pi_1.00_dimer.out	-458.687	-460.595	-230.781	-231.818	-227.905	-228.77	-228.77	-231.818		52_Benzene-AcOH_OH-pi_1.00_dimer.out	-458.687	-460.596	-230.781	-231.818	-227.905	-228.77	-228.771	-231.819		52_Benzene-AcOH_OH-pi_1.00_dimer.out	-460.597	-231.819	-228.77	-228.771	-231.819	-460.597	-231.819	-228.77	-228.77	-231.819	-460.597	-231.819	-228.77	-228.771	-231.819	-460.597	-231.819	-228.77	-228.771	-231.819	-460.597	-231.819	-228.77	-228.771	-231.819	-460.595	-231.818	-228.769
4.334	53_Benzene-AcNH2_NH-pi_1.00_dimer.out	-438.845	-440.731	-230.781	-231.818	-208.063	-208.906	-208.907	-231.818		53_Benzene-AcNH2_NH-pi_1.00_dimer.out	-438.845	-440.732	-230.781	-231.818	-208.063	-208.907	-208.907	-231.819		53_Benzene-AcNH2_NH-pi_1.00_dimer.out	-440.733	-231.819	-208.907	-208.907	-231.819	-440.733	-231.819	-208.906	-208.907	-231.819	-440.733	-231.819	-208.907	-208.907	-231.819	-440.733	-231.819	-208.907	-208.907	-231.819	-440.733	-231.819	-208.907	-208.907	-231.819	-440.731	-231.818	-208.906
3.224	54_Benzene-Water_OH-pi_1.00_dimer.out	-306.843	-308.165	-230.781	-231.818	-76.0601	-76.3415	-76.3418	-231.818		54_Benzene-Water_OH-pi_1.00_dimer.out	-306.843	-308.165	-230.781	-231.818	-76.0601	-76.3415	-76.3418	-231.818		54_Benzene-Water_OH-pi_1.00_dimer.out	-308.166	-231.819	-76.3415	-76.3419	-231.819	-308.166	-231.819	-76.3414	-76.3417	-231.819	-308.166	-231.819	-76.3414	-76.3418	-231.819	-308.166	-231.819	-76.3415	-76.3419	-231.819	-308.166	-231.819	-76.3415	-76.3419	-231.819	-308.165	-231.818	-76.3416
4.106	55_Benzene-MeOH_OH-pi_1.00_dimer.out	-345.873	-347.385	-230.781	-231.818	-115.092	-115.561	-115.561	-231.818		55_Benzene-MeOH_OH-pi_1.00_dimer.out	-345.873	-347.386	-230.781	-231.818	-115.092	-115.561	-115.561	-231.819		55_Benzene-MeOH_OH-pi_1.00_dimer.out	-347.387	-231.819	-115.561	-115.561	-231.819	-347.387	-231.819	-115.561	-115.561	-231.819	-347.387	-231.819	-115.561	-115.561	-231.82	-347.387	-231.819	-115.561	-115.561	-231.819	-347.387	-231.819	-115.561	-115.561	-231.819	-347.386	-231.818	-115.561
3.139	56_Benzene-MeNH2_NH-pi_1.00_dimer.out	-326.035	-327.527	-230.781	-231.818	-95.2551	-95.7046	-95.7047	-231.818		56_Benzene-MeNH2_NH-pi_1.00_dimer.out	-326.035	-327.528	-230.781	-231.818	-95.2551	-95.7045	-95.7048	-231.819		56_Benzene-MeNH2_NH-pi_1.00_dimer.out	-327.529	-231.819	-95.7045	-95.7049	-231.819	-327.529	-231.819	-95.7045	-95.7048	-231.819	-327.529	-231.819	-95.7045	-95.7049	-231.819	-327.529	-231.819	-95.7045	-95.7049	-231.819	-327.529	-231.819	-95.7045	-95.7049	-231.819	-327.528	-231.818	-95.7046
5.176	57_Benzene-Peptide_NH-pi_1.00_dimer.out	-477.883	-479.966	-230.781	-231.818	-247.102	-248.14	-248.14	-231.819		57_Benzene-Peptide_NH-pi_1.00_dimer.out	-477.883	-479.967	-230.781	-231.818	-247.102	-248.14	-248.141	-231.819		57_Benzene-Peptide_NH-pi_1.00_dimer.out	-479.969	-231.819	-248.141	-248.141	-231.82	-479.969	-231.819	-248.14	-248.141	-231.82	-479.969	-231.819	-248.14	-248.141	-231.82	-479.969	-231.819	-248.141	-248.141	-231.82	-479.969	-231.819	-248.141	-248.141	-231.82	-479.967	-231.818	-248.139
4.166	58_Pyridine-Pyridine_CH-N_1.00_dimer.out	-493.559	-495.7	-246.778	-247.847	-246.778	-247.847	-247.847	-247.847		58_Pyridine-Pyridine_CH-N_1.00_dimer.out	-493.559	-495.7	-246.778	-247.847	-246.778	-247.847	-247.847	-247.847		58_Pyridine-Pyridine_CH-N_1.00_dimer.out	-495.702	-247.847	-247.847	-247.848	-247.848	-495.702	-247.847	-247.847	-247.848	-247.848	-495.702	-247.847	-247.847	-247.848	-247.848	-495.702	-247.847	-247.847	-247.848	-247.848	-495.702	-247.847	-247.847	-247.848	-247.848	-495.7	-247.846	-247.846
2.899	59_Ethyne-Water_CH-O_1.00_dimer.out	-152.913	-153.538	-76.8487	-77.1915	-76.0603	-76.3415	-76.3417	-77.1916		59_Ethyne-Water_CH-O_1.00_dimer.out	-152.913	-153.538	-76.8487	-77.1915	-76.0603	-76.3415	-76.3417	-77.1916		59_Ethyne-Water_CH-O_1.00_dimer.out	-153.538	-77.1915	-76.3415	-76.3418	-77.1916	-153.538	-77.1915	-76.3415	-76.3417	-77.1916	-153.538	-77.1915	-76.3415	-76.3418	-77.1916	-153.538	-77.1915	-76.3415	-76.3418	-77.1916	-153.538	-77.1915	-76.3415	-76.3418	-77.1916	-153.538	-77.1917	-76.3416
4.854	60_Ethyne-AcOH_OH-pi_1.00_dimer.out	-304.758	-305.969	-76.8486	-77.1915	-227.905	-228.77	-228.77	-77.1917		60_Ethyne-AcOH_OH-pi_1.00_dimer.out	-304.758	-305.969	-76.8486	-77.1915	-227.905	-228.77	-228.77	-77.1917		60_Ethyne-AcOH_OH-pi_1.00_dimer.out	-305.97	-77.1915	-228.77	-228.771	-77.1918	-305.969	-77.1915	-228.77	-228.77	-77.1918	-305.969	-77.1915	-228.77	-228.77	-77.1918	-305.97	-77.1915	-228.77	-228.771	-77.1918	-305.97	-77.1915	-228.77	-228.771	-77.1918	-305.969	-77.1916	-228.769
2.82	61_Pentane-AcOH_1.00_dimer.out	-424.307	-426.178	-196.404	-197.403	-227.905	-228.77	-228.77	-197.404		61_Pentane-AcOH_1.00_dimer.out	-424.307	-426.179	-196.404	-197.404	-227.905	-228.77	-228.771	-197.404		61_Pentane-AcOH_1.00_dimer.out	-426.179	-197.404	-228.77	-228.771	-197.404	-426.179	-197.404	-228.77	-228.77	-197.404	-426.179	-197.404	-228.77	-228.771	-197.404	-426.179	-197.404	-228.77	-228.771	-197.404	-426.179	-197.404	-228.77	-228.771	-197.404	-426.178	-197.404	-228.769
3.437	62_Pentane-AcNH2_1.00_dimer.out	-404.464	-406.315	-196.404	-197.403	-208.063	-208.906	-208.907	-197.404		62_Pentane-AcNH2_1.00_dimer.out	-404.464	-406.316	-196.404	-197.404	-208.063	-208.907	-208.907	-197.404		62_Pentane-AcNH2_1.00_dimer.out	-406.317	-197.404	-208.907	-208.907	-197.404	-406.316	-197.404	-208.906	-208.907	-197.404	-406.317	-197.404	-208.907	-208.907	-197.404	-406.317	-197.404	-208.907	-208.907	-197.404	-406.317	-197.404	-208.907	-208.907	-197.404	-406.315	-197.404	-208.906
3.671	63_Benzene-AcOH_1.00_dimer.out	-458.684	-460.594	-230.781	-231.818	-227.905	-228.77	-228.77	-231.818		63_Benzene-AcOH_1.00_dimer.out	-458.684	-460.595	-230.781	-231.818	-227.905	-228.77	-228.771	-231.819		63_Benzene-AcOH_1.00_dimer.out	-460.596	-231.819	-228.77	-228.771	-231.819	-460.596	-231.819	-228.77	-228.77	-231.819	-460.596	-231.819	-228.77	-228.771	-231.82	-460.596	-231.819	-228.77	-228.771	-231.82	-460.596	-231.819	-228.77	-228.771	-231.819	-460.594	-231.818	-228.769
2.928	64_Peptide-Ethene_1.00_dimer.out	-325.167	-326.587	-247.103	-248.14	-78.0645	-78.4427	-78.4428	-248.14		64_Peptide-Ethene_1.00_dimer.out	-325.167	-326.588	-247.103	-248.14	-78.0645	-78.4426	-78.4428	-248.141		64_Peptide-Ethene_1.00_dimer.out	-326.588	-248.141	-78.4426	-78.443	-248.141	-326.588	-248.14	-78.4427	-78.443	-248.14	-326.588	-248.14	-78.4427	-78.443	-248.141	-326.588	-248.141	-78.4427	-78.443	-248.141	-326.588	-248.141	-78.4426	-78.4429	-248.141	-326.587	-248.139	-78.4427
4.066	65_Pyridine-Ethyne_1.00_dimer.out	-323.631	-325.044	-246.779	-247.847	-76.8485	-77.1915	-77.1917	-247.847		65_Pyridine-Ethyne_1.00_dimer.out	-323.631	-325.045	-246.779	-247.847	-76.8485	-77.1915	-77.1917	-247.847		65_Pyridine-Ethyne_1.00_dimer.out	-325.045	-247.847	-77.1915	-77.1917	-247.848	-325.046	-247.847	-77.1915	-77.1918	-247.848	-325.046	-247.847	-77.1915	-77.1917	-247.848	-325.046	-247.847	-77.1915	-77.1917	-247.848	-325.046	-247.847	-77.1915	-77.1917	-247.848	-325.045	-247.846	-77.1917
3.893	66_MeNH2-Pyridine_1.00_dimer.out	-342.033	-343.557	-95.2551	-95.7046	-246.778	-247.847	-247.847	-95.7047		66_MeNH2-Pyridine_1.00_dimer.out	-342.033	-343.558	-95.2551	-95.7045	-246.778	-247.847	-247.847	-95.7048		66_MeNH2-Pyridine_1.00_dimer.out	-343.559	-95.7045	-247.847	-247.848	-95.7049	-343.559	-95.7045	-247.847	-247.848	-95.7048	-343.559	-95.7045	-247.847	-247.848	-95.7049	-343.559	-95.7045	-247.847	-247.848	-95.7049	-343.559	-95.7045	-247.847	-247.848	-95.7049	-343.557	-95.7046	-247.846
[truncated: 55 more columns]

## Sheet: haVTZ S66x8
	DF-CCSD(T)
						PNO-LCCSD(T)	PNO-LCCSD(T)	PNO-LCCSD(T)	PNO-LCCSD(T)	PNO-LCCSD(T)	PNO-LCCSD(T)	HF	PNO-LCCSD(T)	HF	PNO-LCCSD(T)	1e-07					1e-06					1e-08					Normal					Tight]					vTight
	dimer	monomersA	monomersB	cpA	cpB	dimer	monomersA	monomersB	cpA	cpB						DLPNO-CCSD(T1)/ haVTZ	DLPNO-CCSD(T1)/ haVTZ	DLPNO-CCSD(T1)/haVTZ	DLPNO-CCSD(T1)/haVTZ	DLPNO-CCSD(T1)/haVTZ	DLPNO-CCSD(T1)/ haVTZ	DLPNO-CCSD(T1)/ haVTZ	DLPNO-CCSD(T1)/haVTZ	DLPNO-CCSD(T1)/haVTZ	DLPNO-CCSD(T1)/haVTZ	DLPNO-CCSD(T1)/ haVTZ	DLPNO-CCSD(T1)/ haVTZ	DLPNO-CCSD(T1)/haVTZ	DLPNO-CCSD(T1)/haVTZ	DLPNO-CCSD(T1)/haVTZ	E_LNO-CCSD_T	E_LNO-CCSD_T	E_LNO-CCSD_T	E_LNO-CCSD_T	E_LNO-CCSD_T	E_LNO-CCSD_T	E_LNO-CCSD_T	E_LNO-CCSD_T	E_LNO-CCSD_T	E_LNO-CCSD_T	E_LNO-CCSD_T	E_LNO-CCSD_T	E_LNO-CCSD_T	E_LNO-CCSD_T	E_LNO-CCSD_T
01_Water-Water_0.90_dimer.out	-152.691	-76.3415	-76.3415	-76.3419	-76.3418	-152.69	-76.3415	-76.3416	-76.3418	-76.3418	-152.69	-76.3415	-76.3415	-76.3419	-76.3418	-152.69	-76.3415	-76.3416	-76.3419	-76.3418	-152.69	-76.3416	-76.3416	-76.342	-76.3419	-152.691	-76.3415	-76.3416	-76.3419	-76.3419	-152.69	-76.3414	-76.3415	-76.3418	-76.3415	-152.69	-76.3415	-76.3415	-76.3419	-76.3418	-152.69	-76.3415	-76.3415	-76.3419	-76.3418	-152.691	-76.3415	-76.3415	-76.3419
01_Water-Water_0.95_dimer.out	-152.691	-76.3415	-76.3415	-76.3418	-76.3418	-152.691	-76.3415	-76.3416	-76.3418	-76.3417	-152.691	-76.3415	-76.3415	-76.3418	-76.3418	-152.691	-76.3415	-76.3416	-76.3419	-76.3418	-152.691	-76.3416	-76.3416	-76.3419	-76.3419	-152.691	-76.3415	-76.3416	-76.3419	-76.3418	-152.691	-76.3414	-76.3415	-76.3418	-76.3417	-152.691	-76.3415	-76.3415	-76.3418	-76.3417	-152.691	-76.3415	-76.3415	-76.3418	-76.3418	-152.691	-76.3415	-76.3415	-76.3418
01_Water-Water_1.00_dimer.out	-152.691	-76.3415	-76.3415	-76.3418	-76.3417	-152.691	-76.3415	-76.3416	-76.3418	-76.3417	-152.691	-76.3415	-76.3415	-76.3418	-76.3417	-152.691	-76.3415	-76.3416	-76.3418	-76.3418	-152.691	-76.3416	-76.3416	-76.3419	-76.3418	-152.691	-76.3415	-76.3416	-76.3418	-76.3418	-152.691	-76.3414	-76.3415	-76.3417	-76.3417	-152.691	-76.3415	-76.3415	-76.3418	-76.3417	-152.691	-76.3415	-76.3415	-76.3418	-76.3417	-152.691	-76.3415	-76.3415	-76.3418
01_Water-Water_1.05_dimer.out	-152.691	-76.3415	-76.3415	-76.3418	-76.3417	-152.691	-76.3415	-76.3416	-76.3417	-76.3417	-152.691	-76.3415	-76.3415	-76.3418	-76.3417	-152.691	-76.3415	-76.3416	-76.3418	-76.3417	-152.691	-76.3416	-76.3416	-76.3419	-76.3418	-152.691	-76.3415	-76.3416	-76.3418	-76.3417	-152.691	-76.3414	-76.3415	-76.3417	-76.3416	-152.691	-76.3415	-76.3415	-76.3417	-76.3417	-152.691	-76.3415	-76.3415	-76.3418	-76.3417	-152.691	-76.3415	-76.3415	-76.3418
01_Water-Water_1.10_dimer.out	-152.69	-76.3415	-76.3415	-76.3417	-76.3417	-152.69	-76.3415	-76.3416	-76.3417	-76.3417	-152.69	-76.3415	-76.3415	-76.3417	-76.3417	-152.69	-76.3415	-76.3416	-76.3418	-76.3417	-152.69	-76.3416	-76.3416	-76.3418	-76.3418	-152.69	-76.3415	-76.3416	-76.3418	-76.3417	-152.69	-76.3414	-76.3415	-76.3417	-76.3416	-152.69	-76.3415	-76.3415	-76.3417	-76.3416	-152.69	-76.3415	-76.3415	-76.3417	-76.3417	-152.69	-76.3415	-76.3415	-76.3417
01_Water-Water_1.25_dimer.out	-152.689	-76.3415	-76.3415	-76.3417	-76.3416	-152.689	-76.3415	-76.3416	-76.3417	-76.3416	-152.689	-76.3415	-76.3415	-76.3417	-76.3416	-152.689	-76.3415	-76.3416	-76.3417	-76.3416	-152.689	-76.3416	-76.3416	-76.3418	-76.3417	-152.689	-76.3415	-76.3416	-76.3417	-76.3416	-152.689	-76.3414	-76.3415	-76.3416	-76.3415	-152.689	-76.3415	-76.3415	-76.3416	-76.3416	-152.689	-76.3415	-76.3415	-76.3417	-76.3416	-152.689	-76.3415	-76.3415	-76.3417
01_Water-Water_1.50_dimer.out	-152.686	-76.3415	-76.3415	-76.3416	-76.3415	-152.686	-76.3415	-76.3416	-76.3416	-76.3415	-152.686	-76.3415	-76.3415	-76.3416	-76.3415	-152.687	-76.3415	-76.3416	-76.3416	-76.3416	-152.687	-76.3416	-76.3416	-76.3417	-76.3416	-152.687	-76.3415	-76.3416	-76.3416	-76.3416	-152.686	-76.3414	-76.3415	-76.3415	-76.3415	-152.686	-76.3415	-76.3415	-76.3416	-76.3415	-152.686	-76.3415	-76.3415	-76.3416	-76.3415	-152.686	-76.3415	-76.3415	-76.3416
01_Water-Water_2.00_dimer.out	-152.684	-76.3415	-76.3415	-76.3416	-76.3415	-152.685	-76.3415	-76.3416	-76.3416	-76.3415	-152.684	-76.3415	-76.3415	-76.3415	-76.3415	-152.685	-76.3415	-76.3416	-76.3416	-76.3415	-152.685	-76.3416	-76.3416	-76.3416	-76.3416	-152.685	-76.3415	-76.3416	-76.3416	-76.3416	-152.684	-76.3414	-76.3415	-76.3415	-76.3414	-152.684	-76.3415	-76.3415	-76.3415	-76.3415	-152.684	-76.3415	-76.3415	-76.3415	-76.3415	-152.684	-76.3415	-76.3415	-76.3416
02_Water-MeOH_0.90_dimer.out	-191.911	-76.3415	-115.561	-115.562	-76.3419	-191.911	-76.3415	-115.561	-115.561	-76.3418	-191.911	-76.3415	-115.561	-115.562	-76.3419	-191.911	-76.3415	-115.561	-115.562	-76.342	-191.911	-76.3416	-115.561	-115.562	-76.342	-191.911	-76.3415	-115.561	-115.562	-76.342	-191.911	-76.3414	-115.561	-115.561	-76.3419	-191.911	-76.3415	-115.561	-115.562	-76.3419	-191.911	-76.3415	-115.561	-115.562	-76.3419	-191.911	-76.3415	-115.561	-115.562
02_Water-MeOH_0.95_dimer.out	-191.912	-76.3415	-115.561	-115.562	-76.3419	-191.911	-76.3415	-115.561	-115.561	-76.3418	-191.912	-76.3415	-115.561	-115.561	-76.3419	-191.912	-76.3415	-115.561	-115.562	-76.3419	-191.912	-76.3416	-115.561	-115.562	-76.342	-191.912	-76.3415	-115.561	-115.562	-76.3419	-191.911	-76.3414	-115.561	-115.561	-76.3418	-191.912	-76.3415	-115.561	-115.561	-76.3418	-191.912	-76.3415	-115.561	-115.562	-76.3419	-191.912	-76.3415	-115.561	-115.562
02_Water-MeOH_1.00_dimer.out	-191.912	-76.3415	-115.561	-115.561	-76.3418	-191.911	-76.3415	-115.561	-115.561	-76.3417	-191.912	-76.3415	-115.561	-115.561	-76.3418	-191.912	-76.3415	-115.561	-115.561	-76.3419	-191.912	-76.3416	-115.561	-115.561	-76.3419	-191.912	-76.3415	-115.561	-115.562	-76.3419	-191.911	-76.3414	-115.561	-115.561	-76.3418	-191.912	-76.3415	-115.561	-115.561	-76.3418	-191.912	-76.3415	-115.561	-115.561	-76.3418	-191.912	-76.3415	-115.561	-115.561
02_Water-MeOH_1.05_dimer.out	-191.911	-76.3415	-115.561	-115.561	-76.3418	-191.911	-76.3415	-115.561	-115.561	-76.3417	-191.911	-76.3415	-115.561	-115.561	-76.3418	-191.911	-76.3415	-115.561	-115.561	-76.3418	-191.911	-76.3416	-115.561	-115.561	-76.3419	-191.911	-76.3415	-115.561	-115.561	-76.3418	-191.911	-76.3414	-115.561	-115.561	-76.3417	-191.911	-76.3415	-115.561	-115.561	-76.3417	-191.911	-76.3415	-115.561	-115.561	-76.3418	-191.911	-76.3415	-115.561	-115.561
02_Water-MeOH_1.10_dimer.out	-191.911	-76.3415	-115.561	-115.561	-76.3417	-191.911	-76.3415	-115.561	-115.561	-76.3417	-191.911	-76.3415	-115.561	-115.561	-76.3417	-191.911	-76.3415	-115.561	-115.561	-76.3418	-191.911	-76.3416	-115.561	-115.561	-76.3418	-191.911	-76.3415	-115.561	-115.561	-76.3418	-191.911	-76.3414	-115.561	-115.561	-76.3416	-191.911	-76.3415	-115.561	-115.561	-76.3417	-191.911	-76.3415	-115.561	-115.561	-76.3417	-191.911	-76.3415	-115.561	-115.561
02_Water-MeOH_1.25_dimer.out	-191.909	-76.3415	-115.561	-115.561	-76.3417	-191.909	-76.3415	-115.561	-115.561	-76.3416	-191.909	-76.3415	-115.561	-115.561	-76.3416	-191.909	-76.3415	-115.561	-115.561	-76.3417	-191.909	-76.3416	-115.561	-115.561	-76.3417	-191.909	-76.3415	-115.561	-115.561	-76.3417	-191.909	-76.3414	-115.561	-115.561	-76.3416	-191.909	-76.3415	-115.561	-115.561	-76.3416	-191.909	-76.3415	-115.561	-115.561	-76.3416	-191.909	-76.3415	-115.561	-115.561
02_Water-MeOH_1.50_dimer.out	-191.907	-76.3415	-115.561	-115.561	-76.3416	-191.906	-76.3415	-115.561	-115.561	-76.3416	-191.906	-76.3415	-115.561	-115.561	-76.3415	-191.907	-76.3415	-115.561	-115.561	-76.3416	-191.907	-76.3416	-115.561	-115.561	-76.3417	-191.907	-76.3415	-115.561	-115.561	-76.3416	-191.906	-76.3414	-115.561	-115.561	-76.3415	-191.906	-76.3415	-115.561	-115.561	-76.3415	-191.906	-76.3415	-115.561	-115.561	-76.3416	-191.907	-76.3415	-115.561	-115.561
02_Water-MeOH_2.00_dimer.out	-191.904	-76.3415	-115.561	-115.561	-76.3415	-191.904	-76.3415	-115.561	-115.561	-76.3415	-191.904	-76.3415	-115.561	-115.561	-76.3415	-191.904	-76.3415	-115.561	-115.561	-76.3415	-191.904	-76.3416	-115.561	-115.561	-76.3416	-191.904	-76.3415	-115.561	-115.561	-76.3416	-191.904	-76.3414	-115.561	-115.561	-76.3414	-191.904	-76.3415	-115.561	-115.561	-76.3415	-191.904	-76.3415	-115.561	-115.561	-76.3415	-191.904	-76.3415	-115.561	-115.561
03_Water-MeNH2_0.90_dimer.out	-172.057	-76.3414	-95.7046	-95.705	-76.3419	-172.056	-76.3415	-95.7046	-95.7049	-76.3417	-172.056	-76.3414	-95.7045	-95.7049	-76.3418	-172.057	-76.3415	-95.7046	-95.705	-76.3419	-172.057	-76.3415	-95.7047	-95.7051	-76.342	-172.057	-76.3415	-95.7046	-95.705	-76.3419	-172.056	-76.3414	-95.7045	-95.705	-76.3415	-172.057	-76.3414	-95.7046	-95.705	-76.3418	-172.057	-76.3414	-95.7046	-95.705	-76.3419	-172.057	-76.3414	-95.7046	-95.705
03_Water-MeNH2_0.95_dimer.out	-172.057	-76.3414	-95.7046	-95.7049	-76.3418	-172.057	-76.3415	-95.7046	-95.7049	-76.3417	-172.057	-76.3414	-95.7045	-95.7049	-76.3418	-172.057	-76.3415	-95.7046	-95.7049	-76.3419	-172.057	-76.3415	-95.7047	-95.705	-76.3419	-172.057	-76.3415	-95.7046	-95.705	-76.3419	-172.057	-76.3414	-95.7045	-95.7049	-76.3417	-172.057	-76.3414	-95.7046	-95.7049	-76.3418	-172.057	-76.3414	-95.7046	-95.7049	-76.3418	-172.057	-76.3414	-95.7046	-95.7049
03_Water-MeNH2_1.00_dimer.out	-172.057	-76.3414	-95.7046	-95.7049	-76.3418	-172.057	-76.3415	-95.7046	-95.7048	-76.3417	-172.057	-76.3414	-95.7045	-95.7048	-76.3417	-172.057	-76.3415	-95.7046	-95.7049	-76.3418	-172.057	-76.3415	-95.7047	-95.705	-76.3419	-172.057	-76.3415	-95.7046	-95.7049	-76.3418	-172.057	-76.3414	-95.7045	-95.7048	-76.3417	-172.057	-76.3414	-95.7046	-95.7049	-76.3417	-172.057	-76.3414	-95.7046	-95.7049	-76.3418	-172.057	-76.3414	-95.7046	-95.7049
03_Water-MeNH2_1.05_dimer.out	-172.057	-76.3414	-95.7046	-95.7048	-76.3417	-172.057	-76.3415	-95.7046	-95.7048	-76.3417	-172.057	-76.3414	-95.7045	-95.7048	-76.3417	-172.057	-76.3415	-95.7046	-95.7048	-76.3418	-172.057	-76.3415	-95.7047	-95.7049	-76.3418	-172.057	-76.3415	-95.7046	-95.7049	-76.3418	-172.057	-76.3414	-95.7045	-95.7048	-76.3416	-172.057	-76.3414	-95.7046	-95.7048	-76.3417	-172.057	-76.3414	-95.7046	-95.7048	-76.3417	-172.057	-76.3414	-95.7046	-95.7048
03_Water-MeNH2_1.10_dimer.out	-172.056	-76.3414	-95.7046	-95.7048	-76.3417	-172.056	-76.3415	-95.7046	-95.7047	-76.3416	-172.056	-76.3414	-95.7045	-95.7047	-76.3417	-172.056	-76.3415	-95.7046	-95.7048	-76.3417	-172.056	-76.3415	-95.7047	-95.7049	-76.3418	-172.056	-76.3415	-95.7046	-95.7048	-76.3417	-172.056	-76.3414	-95.7045	-95.7047	-76.3416	-172.056	-76.3414	-95.7046	-95.7048	-76.3416	-172.056	-76.3414	-95.7046	-95.7048	-76.3417	-172.056	-76.3414	-95.7046	-95.7048
03_Water-MeNH2_1.25_dimer.out	-172.054	-76.3414	-95.7046	-95.7047	-76.3416	-172.054	-76.3415	-95.7046	-95.7047	-76.3416	-172.054	-76.3414	-95.7045	-95.7046	-76.3416	-172.054	-76.3415	-95.7046	-95.7047	-76.3416	-172.054	-76.3415	-95.7047	-95.7048	-76.3417	-172.054	-76.3415	-95.7046	-95.7048	-76.3416	-172.054	-76.3414	-95.7045	-95.7047	-76.3415	-172.054	-76.3414	-95.7046	-95.7047	-76.3415	-172.054	-76.3414	-95.7046	-95.7047	-76.3416	-172.054	-76.3414	-95.7046	-95.7047
03_Water-MeNH2_1.50_dimer.out	-172.051	-76.3414	-95.7046	-95.7047	-76.3415	-172.051	-76.3415	-95.7046	-95.7046	-76.3415	-172.051	-76.3414	-95.7045	-95.7046	-76.3415	-172.051	-76.3415	-95.7046	-95.7047	-76.3415	-172.051	-76.3415	-95.7047	-95.7047	-76.3416	-172.051	-76.3415	-95.7046	-95.7047	-76.3416	-172.051	-76.3414	-95.7045	-95.7046	-76.3414	-172.051	-76.3414	-95.7046	-95.7046	-76.3414	-172.051	-76.3414	-95.7046	-95.7047	-76.3415	-172.051	-76.3414	-95.7046	-95.7046
03_Water-MeNH2_2.00_dimer.out	-172.048	-76.3414	-95.7046	-95.7046	-76.3414	-172.048	-76.3415	-95.7046	-95.7046	-76.3415	-172.048	-76.3414	-95.7045	-95.7046	-76.3414	-172.048	-76.3415	-95.7046	-95.7046	-76.3415	-172.048	-76.3415	-95.7047	-95.7047	-76.3415	-172.048	-76.3415	-95.7046	-95.7047	-76.3415	-172.048	-76.3414	-95.7045	-95.7046	-76.3414	-172.048	-76.3414	-95.7046	-95.7046	-76.3414	-172.048	-76.3414	-95.7046	-95.7046	-76.3414	-172.048	-76.3414	-95.7046	-95.7046
04_Water-Peptide_0.90_dimer.out	-324.494	-76.3414	-248.141	-248.141	-76.3421	-324.493	-76.3415	-248.14	-248.14	-76.3419	-324.494	-76.3414	-248.14	-248.141	-76.342	-324.494	-76.3415	-248.14	-248.141	-76.3421	-324.493	-76.3415	-248.139	-248.14	-76.3421	-324.494	-76.3415	-248.141	-248.141	-76.3421	-324.494	-76.3414	-248.14	-248.14	-76.342	-324.494	-76.3414	-248.14	-248.141	-76.342	-324.494	-76.3414	-248.14	-248.141	-76.342	-324.494	-76.3414	-248.14	-248.141
04_Water-Peptide_0.95_dimer.out	-324.495	-76.3414	-248.141	-248.141	-76.342	-324.494	-76.3415	-248.14	-248.14	-76.3418	-324.495	-76.3414	-248.14	-248.141	-76.3419	-324.495	-76.3415	-248.14	-248.141	-76.342	-324.494	-76.3415	-248.139	-248.14	-76.3421	-324.495	-76.3415	-248.141	-248.141	-76.342	-324.494	-76.3414	-248.14	-248.14	-76.3419	-324.495	-76.3414	-248.14	-248.141	-76.3419	-324.495	-76.3414	-248.14	-248.141	-76.342	-324.495	-76.3414	-248.14	-248.141
04_Water-Peptide_1.00_dimer.out	-324.495	-76.3414	-248.141	-248.141	-76.3419	-324.494	-76.3415	-248.14	-248.14	-76.3418	-324.495	-76.3414	-248.14	-248.141	-76.3419	-324.495	-76.3415	-248.14	-248.141	-76.342	-324.494	-76.3415	-248.139	-248.14	-76.342	-324.495	-76.3415	-248.141	-248.141	-76.342	-324.494	-76.3414	-248.14	-248.14	-76.3418	-324.495	-76.3414	-248.14	-248.141	-76.3419	-324.495	-76.3414	-248.14	-248.141	-76.3419	-324.495	-76.3414	-248.14	-248.141
04_Water-Peptide_1.05_dimer.out	-324.495	-76.3414	-248.141	-248.141	-76.3419	-324.494	-76.3415	-248.14	-248.14	-76.3418	-324.494	-76.3414	-248.14	-248.14	-76.3418	-324.494	-76.3415	-248.14	-248.14	-76.3419	-324.493	-76.3415	-248.139	-248.14	-76.342	-324.495	-76.3415	-248.141	-248.141	-76.3419	-324.494	-76.3414	-248.14	-248.14	-76.3418	-324.494	-76.3414	-248.14	-248.141	-76.3418	-324.495	-76.3414	-248.14	-248.141	-76.3419	-324.495	-76.3414	-248.14	-248.141
04_Water-Peptide_1.10_dimer.out	-324.494	-76.3414	-248.141	-248.141	-76.3418	-324.493	-76.3415	-248.14	-248.14	-76.3417	-324.494	-76.3414	-248.14	-248.14	-76.3418	-324.494	-76.3415	-248.14	-248.14	-76.3419	-324.493	-76.3415	-248.139	-248.14	-76.3419	-324.494	-76.3415	-248.141	-248.141	-76.3419	-324.493	-76.3414	-248.14	-248.14	-76.3417	-324.494	-76.3414	-248.14	-248.141	-76.3418	-324.494	-76.3414	-248.14	-248.141	-76.3418	-324.494	-76.3414	-248.14	-248.141
04_Water-Peptide_1.25_dimer.out	-324.492	-76.3414	-248.141	-248.141	-76.3417	-324.491	-76.3415	-248.14	-248.14	-76.3417	-324.491	-76.3414	-248.14	-248.14	-76.3417	-324.491	-76.3415	-248.14	-248.14	-76.3417	-324.49	-76.3415	-248.139	-248.139	-76.3418	-324.492	-76.3415	-248.141	-248.141	-76.3418	-324.491	-76.3414	-248.14	-248.14	-76.3416	-324.491	-76.3414	-248.14	-248.14	-76.3416	-324.492	-76.3414	-248.14	-248.141	-76.3417	-324.492	-76.3414	-248.14	-248.141
04_Water-Peptide_1.50_dimer.out	-324.488	-76.3414	-248.141	-248.141	-76.3416	-324.487	-76.3415	-248.14	-248.14	-76.3416	-324.488	-76.3414	-248.14	-248.14	-76.3415	-324.488	-76.3415	-248.14	-248.14	-76.3416	-324.487	-76.3415	-248.139	-248.139	-76.3417	-324.488	-76.3415	-248.141	-248.141	-76.3416	-324.488	-76.3414	-248.14	-248.14	-76.3415	-324.488	-76.3414	-248.14	-248.14	-76.3415	-324.488	-76.3414	-248.14	-248.141	-76.3416	-324.488	-76.3414	-248.14	-248.141
04_Water-Peptide_2.00_dimer.out	-324.484	-76.3414	-248.141	-248.141	-76.3415	-324.484	-76.3415	-248.14	-248.14	-76.3415	-324.484	-76.3414	-248.14	-248.14	-76.3415	-324.484	-76.3415	-248.14	-248.14	-76.3415	-324.483	-76.3415	-248.139	-248.139	-76.3416	-324.484	-76.3415	-248.141	-248.141	-76.3415	-324.484	-76.3414	-248.14	-248.14	-76.3414	-324.484	-76.3414	-248.14	-248.14	-76.3414	-324.484	-76.3414	-248.14	-248.14	-76.3415	-324.484	-76.3414	-248.14	-248.141
05_MeOH-MeOH_0.90_dimer.out	-231.131	-115.561	-115.561	-115.562	-115.561	-231.13	-115.561	-115.561	-115.562	-115.561	-231.131	-115.561	-115.561	-115.562	-115.561	-231.131	-115.561	-115.561	-115.562	-115.561	-231.131	-115.561	-115.561	-115.562	-115.561	-231.131	-115.561	-115.561	-115.562	-115.561	-231.131	-115.561	-115.561	-115.562	-115.561	-231.131	-115.561	-115.561	-115.562	-115.561	-231.131	-115.561	-115.561	-115.562	-115.561	-231.131	-115.561	-115.561	-115.562
05_MeOH-MeOH_0.95_dimer.out	-231.131	-115.561	-115.561	-115.562	-115.561	-231.131	-115.561	-115.561	-115.561	-115.561	-231.131	-115.561	-115.561	-115.561	-115.561	-231.131	-115.561	-115.561	-115.562	-115.561	-231.131	-115.561	-115.561	-115.562	-115.561	-231.132	-115.561	-115.561	-115.562	-115.561	-231.131	-115.561	-115.561	-115.561	-115.561	-231.131	-115.561	-115.561	-115.562	-115.561	-231.131	-115.561	-115.561	-115.562	-115.561	-231.131	-115.561	-115.561	-115.562
05_MeOH-MeOH_1.00_dimer.out	-231.132	-115.561	-115.561	-115.562	-115.561	-231.131	-115.561	-115.561	-115.561	-115.561	-231.131	-115.561	-115.561	-115.561	-115.561	-231.131	-115.561	-115.561	-115.562	-115.561	-231.131	-115.561	-115.561	-115.562	-115.561	-231.132	-115.561	-115.561	-115.562	-115.561	-231.131	-115.561	-115.561	-115.561	-115.561	-231.131	-115.561	-115.561	-115.561	-115.561	-231.132	-115.561	-115.561	-115.562	-115.561	-231.132	-115.561	-115.561	-115.562
05_MeOH-MeOH_1.05_dimer.out	-231.131	-115.561	-115.561	-115.561	-115.561	-231.131	-115.561	-115.561	-115.561	-115.561	-231.131	-115.561	-115.561	-115.561	-115.561	-231.131	-115.561	-115.561	-115.561	-115.561	-231.131	-115.561	-115.561	-115.561	-115.561	-231.131	-115.561	-115.561	-115.562	-115.561	-231.131	-115.561	-115.561	-115.561	-115.561	-231.131	-115.561	-115.561	-115.561	-115.561	-231.131	-115.561	-115.561	-115.561	-115.561	-231.131	-115.561	-115.561	-115.561
05_MeOH-MeOH_1.10_dimer.out	-231.131	-115.561	-115.561	-115.561	-115.561	-231.13	-115.561	-115.561	-115.561	-115.561	-231.13	-115.561	-115.561	-115.561	-115.561	-231.131	-115.561	-115.561	-115.561	-115.561	-231.13	-115.561	-115.561	-115.561	-115.561	-231.131	-115.561	-115.561	-115.561	-115.561	-231.13	-115.561	-115.561	-115.561	-115.561	-231.131	-115.561	-115.561	-115.561	-115.561	-231.131	-115.561	-115.561	-115.561	-115.561	-231.131	-115.561	-115.561	-115.561
05_MeOH-MeOH_1.25_dimer.out	-231.129	-115.561	-115.561	-115.561	-115.561	-231.129	-115.561	-115.561	-115.561	-115.561	-231.129	-115.561	-115.561	-115.561	-115.561	-231.129	-115.561	-115.561	-115.561	-115.561	-231.129	-115.561	-115.561	-115.561	-115.561	-231.129	-115.561	-115.561	-115.561	-115.561	-231.129	-115.561	-115.561	-115.561	-115.561	-231.129	-115.561	-115.561	-115.561	-115.561	-231.129	-115.561	-115.561	-115.561	-115.561	-231.129	-115.561	-115.561	-115.561
05_MeOH-MeOH_1.50_dimer.out	-231.126	-115.561	-115.561	-115.561	-115.561	-231.126	-115.561	-115.561	-115.561	-115.561	-231.126	-115.561	-115.561	-115.561	-115.561	-231.126	-115.561	-115.561	-115.561	-115.561	-231.126	-115.561	-115.561	-115.561	-115.561	-231.126	-115.561	-115.561	-115.561	-115.561	-231.126	-115.561	-115.561	-115.561	-115.561	-231.126	-115.561	-115.561	-115.561	-115.561	-231.126	-115.561	-115.561	-115.561	-115.561	-231.126	-115.561	-115.561	-115.561
05_MeOH-MeOH_2.00_dimer.out	-231.124	-115.561	-115.561	-115.561	-115.561	-231.124	-115.561	-115.561	-115.561	-115.561	-231.124	-115.561	-115.561	-115.561	-115.561	-231.124	-115.561	-115.561	-115.561	-115.561	-231.124	-115.561	-115.561	-115.561	-115.561	-231.124	-115.561	-115.561	-115.561	-115.561	-231.123	-115.561	-115.561	-115.561	-115.561	-231.124	-115.561	-115.561	-115.561	-115.561	-231.124	-115.561	-115.561	-115.561	-115.561	-231.124	-115.561	-115.561	-115.561
06_MeOH-MeNH2_0.90_dimer.out	-211.277	-115.561	-95.7046	-95.7052	-115.561	-211.276	-115.561	-95.7046	-95.705	-115.561	-211.277	-115.561	-95.7045	-95.7051	-115.561	-211.277	-115.561	-95.7046	-95.7052	-115.561	-211.276	-115.561	-95.7047	-95.7053	-115.561	-211.277	-115.561	-95.7046	-95.7052	-115.561	-211.277	-115.561	-95.7045	-95.7051	-115.561	-211.277	-115.561	-95.7046	-95.7052	-115.561	-211.277	-115.561	-95.7046	-95.7052	-115.561	-211.277	-115.561	-95.7046	-95.7052
06_MeOH-MeNH2_0.95_dimer.out	-211.278	-115.561	-95.7046	-95.7051	-115.561	-211.277	-115.561	-95.7046	-95.7049	-115.561	-211.277	-115.561	-95.7045	-95.705	-115.561	-211.277	-115.561	-95.7046	-95.7051	-115.561	-211.277	-115.561	-95.7047	-95.7052	-115.561	-211.278	-115.561	-95.7046	-95.7051	-115.561	-211.277	-115.561	-95.7045	-95.705	-115.561	-211.277	-115.561	-95.7046	-95.7051	-115.561	-211.278	-115.561	-95.7046	-95.7051	-115.561	-211.278	-115.561	-95.7046	-95.7051
06_MeOH-MeNH2_1.00_dimer.out	-211.278	-115.561	-95.7046	-95.705	-115.561	-211.277	-115.561	-95.7046	-95.7049	-115.561	-211.277	-115.561	-95.7045	-95.7049	-115.561	-211.278	-115.561	-95.7046	-95.705	-115.561	-211.277	-115.561	-95.7047	-95.7051	-115.561	-211.278	-115.561	-95.7046	-95.7051	-115.561	-211.277	-115.561	-95.7045	-95.7049	-115.561	-211.278	-115.561	-95.7046	-95.705	-115.561	-211.278	-115.561	-95.7046	-95.705	-115.561	-211.278	-115.561	-95.7046	-95.705
06_MeOH-MeNH2_1.05_dimer.out	-211.277	-115.561	-95.7046	-95.705	-115.561	-211.277	-115.561	-95.7046	-95.7048	-115.561	-211.277	-115.561	-95.7045	-95.7049	-115.561	-211.277	-115.561	-95.7046	-95.705	-115.561	-211.277	-115.561	-95.7047	-95.705	-115.561	-211.277	-115.561	-95.7046	-95.705	-115.561	-211.277	-115.561	-95.7045	-95.7049	-115.561	-211.277	-115.561	-95.7046	-95.7049	-115.561	-211.277	-115.561	-95.7046	-95.7049	-115.561	-211.277	-115.561	-95.7046	-95.7049
06_MeOH-MeNH2_1.10_dimer.out	-211.277	-115.561	-95.7046	-95.7049	-115.561	-211.276	-115.561	-95.7046	-95.7048	-115.561	-211.276	-115.561	-95.7045	-95.7048	-115.561	-211.277	-115.561	-95.7046	-95.7049	-115.561	-211.276	-115.561	-95.7047	-95.705	-115.561	-211.277	-115.561	-95.7046	-95.7049	-115.561	-211.276	-115.561	-95.7045	-95.7048	-115.561	-211.277	-115.561	-95.7046	-95.7049	-115.561	-211.277	-115.561	-95.7046	-95.7049	-115.561	-211.277	-115.561	-95.7046	-95.7049
06_MeOH-MeNH2_1.25_dimer.out	-211.274	-115.561	-95.7046	-95.7048	-115.561	-211.274	-115.561	-95.7046	-95.7047	-115.561	-211.274	-115.561	-95.7045	-95.7047	-115.561	-211.274	-115.561	-95.7046	-95.7048	-115.561	-211.274	-115.561	-95.7047	-95.7049	-115.561	-211.274	-115.561	-95.7046	-95.7048	-115.561	-211.274	-115.561	-95.7045	-95.7047	-115.561	-211.274	-115.561	-95.7046	-95.7048	-115.561	-211.274	-115.561	-95.7046	-95.7048	-115.561	-211.274	-115.561	-95.7046	-95.7048
06_MeOH-MeNH2_1.50_dimer.out	-211.271	-115.561	-95.7046	-95.7047	-115.561	-211.271	-115.561	-95.7046	-95.7047	-115.561	-211.271	-115.561	-95.7045	-95.7046	-115.561	-211.271	-115.561	-95.7046	-95.7047	-115.561	-211.271	-115.561	-95.7047	-95.7048	-115.561	-211.271	-115.561	-95.7046	-95.7047	-115.561	-211.271	-115.561	-95.7045	-95.7046	-115.561	-211.271	-115.561	-95.7046	-95.7047	-115.561	-211.271	-115.561	-95.7046	-95.7047	-115.561	-211.271	-115.561	-95.7046	-95.7047
06_MeOH-MeNH2_2.00_dimer.out	-211.267	-115.561	-95.7046	-95.7046	-115.561	-211.267	-115.561	-95.7046	-95.7046	-115.561	-211.267	-115.561	-95.7045	-95.7046	-115.561	-211.267	-115.561	-95.7046	-95.7047	-115.561	-211.267	-115.561	-95.7047	-95.7047	-115.561	-211.268	-115.561	-95.7046	-95.7047	-115.561	-211.267	-115.561	-95.7045	-95.7046	-115.561	-211.267	-115.561	-95.7046	-95.7046	-115.561	-211.267	-115.561	-95.7046	-95.7046	-115.561	-211.267	-115.561	-95.7046	-95.7046
07_MeOH-Peptide_0.90_dimer.out	-363.714	-115.561	-248.141	-248.141	-115.561	-363.713	-115.561	-248.14	-248.14	-115.561	-363.713	-115.561	-248.14	-248.141	-115.561	-363.713	-115.561	-248.14	-248.141	-115.561	-363.712	-115.561	-248.139	-248.14	-115.561	-363.714	-115.561	-248.141	-248.141	-115.562	-363.713	-115.561	-248.14	-248.141	-115.561	-363.714	-115.561	-248.14	-248.141	-115.561	-363.714	-115.561	-248.14	-248.141	-115.561	-363.714	-115.561	-248.141	-248.141
07_MeOH-Peptide_0.95_dimer.out	-363.715	-115.561	-248.141	-248.141	-115.561	-363.714	-115.561	-248.14	-248.14	-115.561	-363.714	-115.561	-248.14	-248.141	-115.561	-363.714	-115.561	-248.14	-248.141	-115.561	-363.713	-115.561	-248.139	-248.14	-115.561	-363.715	-115.561	-248.141	-248.141	-115.561	-363.714	-115.561	-248.14	-248.14	-115.561	-363.714	-115.561	-248.14	-248.141	-115.561	-363.715	-115.561	-248.14	-248.141	-115.561	-363.715	-115.561	-248.141	-248.141
07_MeOH-Peptide_1.00_dimer.out	-363.715	-115.561	-248.141	-248.141	-115.561	-363.714	-115.561	-248.14	-248.14	-115.561	-363.714	-115.561	-248.14	-248.141	-115.561	-363.714	-115.561	-248.14	-248.141	-115.561	-363.713	-115.561	-248.139	-248.14	-115.561	-363.715	-115.561	-248.141	-248.141	-115.561	-363.714	-115.561	-248.14	-248.14	-115.561	-363.714	-115.561	-248.14	-248.141	-115.561	-363.715	-115.561	-248.14	-248.141	-115.561	-363.715	-115.561	-248.141	-248.141
07_MeOH-Peptide_1.05_dimer.out	-363.714	-115.561	-248.141	-248.141	-115.561	-363.713	-115.561	-248.14	-248.14	-115.561	-363.714	-115.561	-248.14	-248.141	-115.561	-363.714	-115.561	-248.14	-248.141	-115.561	-363.713	-115.561	-248.139	-248.14	-115.561	-363.714	-115.561	-248.141	-248.141	-115.561	-363.714	-115.561	-248.14	-248.14	-115.561	-363.714	-115.561	-248.14	-248.141	-115.561	-363.714	-115.561	-248.14	-248.141	-115.561	-363.714	-115.561	-248.141	-248.141
07_MeOH-Peptide_1.10_dimer.out	-363.714	-115.561	-248.141	-248.141	-115.561	-363.713	-115.561	-248.14	-248.14	-115.561	-363.713	-115.561	-248.14	-248.141	-115.561	-363.713	-115.561	-248.14	-248.141	-115.561	-363.712	-115.561	-248.139	-248.14	-115.561	-363.714	-115.561	-248.141	-248.141	-115.561	-363.713	-115.561	-248.14	-248.14	-115.561	-363.713	-115.561	-248.14	-248.141	-115.561	-363.714	-115.561	-248.14	-248.141	-115.561	-363.714	-115.561	-248.141	-248.141
07_MeOH-Peptide_1.25_dimer.out	-363.711	-115.561	-248.141	-248.141	-115.561	-363.711	-115.561	-248.14	-248.14	-115.561	-363.711	-115.561	-248.14	-248.14	-115.561	-363.711	-115.561	-248.14	-248.14	-115.561	-363.71	-115.561	-248.139	-248.14	-115.561	-363.711	-115.561	-248.141	-248.141	-115.561	-363.711	-115.561	-248.14	-248.14	-115.561	-363.711	-115.561	-248.14	-248.141	-115.561	-363.711	-115.561	-248.14	-248.141	-115.561	-363.711	-115.561	-248.141	-248.141
07_MeOH-Peptide_1.50_dimer.out	-363.707	-115.561	-248.141	-248.141	-115.561	-363.707	-115.561	-248.14	-248.14	-115.561	-363.707	-115.561	-248.14	-248.14	-115.561	-363.707	-115.561	-248.14	-248.14	-115.561	-363.706	-115.561	-248.139	-248.14	-115.561	-363.707	-115.561	-248.141	-248.141	-115.561	-363.707	-115.561	-248.14	-248.14	-115.561	-363.707	-115.561	-248.14	-248.14	-115.561	-363.707	-115.561	-248.14	-248.141	-115.561	-363.707	-115.561	-248.141	-248.141
07_MeOH-Peptide_2.00_dimer.out	-363.703	-115.561	-248.141	-248.141	-115.561	-363.703	-115.561	-248.14	-248.14	-115.561	-363.703	-115.561	-248.14	-248.14	-115.561	-363.703	-115.561	-248.14	-248.14	-115.561	-363.702	-115.561	-248.139	-248.139	-115.561	-363.703	-115.561	-248.141	-248.141	-115.561	-363.702	-115.561	-248.14	-248.14	-115.561	-363.703	-115.561	-248.14	-248.14	-115.561	-363.703	-115.561	-248.14	-248.141	-115.561	-363.703	-115.561	-248.141	-248.141
08_MeOH-Water_0.90_dimer.out	-191.91	-115.561	-76.3415	-76.342	-115.561	-191.91	-115.561	-76.3416	-76.3419	-115.561	-191.91	-115.561	-76.3415	-76.342	-115.561	-191.91	-115.561	-76.3416	-76.342	-115.561	-191.91	-115.561	-76.3416	-76.3421	-115.561	-191.91	-115.561	-76.3416	-76.342	-115.561	-191.91	-115.561	-76.3415	-76.3419	-115.561	-191.91	-115.561	-76.3415	-76.3419	-115.561	-191.91	-115.561	-76.3415	-76.342	-115.561	-191.91	-115.561	-76.3415	-76.342
08_MeOH-Water_0.95_dimer.out	-191.911	-115.561	-76.3415	-76.3419	-115.561	-191.91	-115.561	-76.3416	-76.3418	-115.561	-191.911	-115.561	-76.3415	-76.3419	-115.561	-191.911	-115.561	-76.3416	-76.342	-115.561	-191.911	-115.561	-76.3416	-76.342	-115.561	-191.911	-115.561	-76.3416	-76.342	-115.561	-191.91	-115.561	-76.3415	-76.3419	-115.561	-191.911	-115.561	-76.3415	-76.3419	-115.561	-191.911	-115.561	-76.3415	-76.3419	-115.561	-191.911	-115.561	-76.3415	-76.3419
08_MeOH-Water_1.00_dimer.out	-191.911	-115.561	-76.3415	-76.3419	-115.561	-191.91	-115.561	-76.3416	-76.3418	-115.561	-191.911	-115.561	-76.3415	-76.3419	-115.561	-191.911	-115.561	-76.3416	-76.3419	-115.561	-191.911	-115.561	-76.3416	-76.342	-115.561	-191.911	-115.561	-76.3416	-76.3419	-115.561	-191.91	-115.561	-76.3415	-76.3418	-115.561	-191.911	-115.561	-76.3415	-76.3418	-115.561	-191.911	-115.561	-76.3415	-76.3419	-115.561	-191.911	-115.561	-76.3415	-76.3419
08_MeOH-Water_1.05_dimer.out	-191.91	-115.561	-76.3415	-76.3418	-115.561	-191.91	-115.561	-76.3416	-76.3418	-115.561	-191.91	-115.561	-76.3415	-76.3418	-115.561	-191.91	-115.561	-76.3416	-76.3419	-115.561	-191.91	-115.561	-76.3416	-76.3419	-115.561	-191.911	-115.561	-76.3416	-76.3419	-115.561	-191.91	-115.561	-76.3415	-76.3418	-115.561	-191.91	-115.561	-76.3415	-76.3418	-115.561	-191.91	-115.561	-76.3415	-76.3418	-115.561	-191.91	-115.561	-76.3415	-76.3418
08_MeOH-Water_1.10_dimer.out	-191.91	-115.561	-76.3415	-76.3418	-115.561	-191.91	-115.561	-76.3416	-76.3417	-115.561	-191.91	-115.561	-76.3415	-76.3418	-115.561	-191.91	-115.561	-76.3416	-76.3418	-115.561	-191.91	-115.561	-76.3416	-76.3419	-115.561	-191.91	-115.561	-76.3416	-76.3418	-115.561	-191.91	-115.561	-76.3415	-76.3417	-115.561	-191.91	-115.561	-76.3415	-76.3417	-115.561	-191.91	-115.561	-76.3415	-76.3418	-115.561	-191.91	-115.561	-76.3415	-76.3418
08_MeOH-Water_1.25_dimer.out	-191.908	-115.561	-76.3415	-76.3417	-115.561	-191.908	-115.561	-76.3416	-76.3417	-115.561	-191.908	-115.561	-76.3415	-76.3417	-115.561	-191.908	-115.561	-76.3416	-76.3417	-115.561	-191.908	-115.561	-76.3416	-76.3418	-115.561	-191.908	-115.561	-76.3416	-76.3418	-115.561	-191.908	-115.561	-76.3415	-76.3416	-115.561	-191.908	-115.561	-76.3415	-76.3416	-115.561	-191.908	-115.561	-76.3415	-76.3417	-115.561	-191.908	-115.561	-76.3415	-76.3417
08_MeOH-Water_1.50_dimer.out	-191.906	-115.561	-76.3415	-76.3416	-115.561	-191.906	-115.561	-76.3416	-76.3416	-115.561	-191.906	-115.561	-76.3415	-76.3416	-115.561	-191.906	-115.561	-76.3416	-76.3417	-115.561	-191.906	-115.561	-76.3416	-76.3417	-115.561	-191.906	-115.561	-76.3416	-76.3417	-115.561	-191.906	-115.561	-76.3415	-76.3415	-115.561	-191.906	-115.561	-76.3415	-76.3416	-115.561	-191.906	-115.561	-76.3415	-76.3416	-115.561	-191.906	-115.561	-76.3415	-76.3416
08_MeOH-Water_2.00_dimer.out	-191.904	-115.561	-76.3415	-76.3416	-115.561	-191.904	-115.561	-76.3416	-76.3416	-115.561	-191.904	-115.561	-76.3415	-76.3416	-115.561	-191.904	-115.561	-76.3416	-76.3416	-115.561	-191.904	-115.561	-76.3416	-76.3417	-115.561	-191.904	-115.561	-76.3416	-76.3416	-115.561	-191.904	-115.561	-76.3415	-76.3415	-115.561	-191.904	-115.561	-76.3415	-76.3415	-115.561	-191.904	-115.561	-76.3415	-76.3416	-115.561	-191.904	-115.561	-76.3415	-76.3416
09_MeNH2-MeOH_0.90_dimer.out	-211.27	-95.7045	-115.561	-115.562	-95.7048	-211.27	-95.7046	-115.561	-115.561	-95.7047	-211.27	-95.7045	-115.561	-115.561	-95.7047	-211.27	-95.7045	-115.561	-115.562	-95.7048	-211.27	-95.7046	-115.561	-115.562	-95.7049	-211.27	-95.7046	-115.561	-115.562	-95.7049	-211.27	-95.7045	-115.561	-115.561	-95.7047	-211.27	-95.7045	-115.561	-115.561	-95.7047	-211.27	-95.7045	-115.561	-115.562	-95.7048	-211.27	-95.7045	-115.561	-115.562
09_MeNH2-MeOH_0.95_dimer.out	-211.271	-95.7045	-115.561	-115.561	-95.7048	-211.27	-95.7046	-115.561	-115.561	-95.7047	-211.271	-95.7045	-115.561	-115.561	-95.7047	-211.271	-95.7045	-115.561	-115.562	-95.7048	-211.271	-95.7046	-115.561	-115.561	-95.7049	-211.271	-95.7046	-115.561	-115.562	-95.7048	-211.271	-95.7045	-115.561	-115.561	-95.7047	-211.271	-95.7045	-115.561	-115.561	-95.7047	-211.271	-95.7045	-115.561	-115.561	-95.7048	-211.271	-95.7045	-115.561	-115.561
09_MeNH2-MeOH_1.00_dimer.out	-211.271	-95.7045	-115.561	-115.561	-95.7047	-211.27	-95.7046	-115.561	-115.561	-95.7046	-211.27	-95.7045	-115.561	-115.561	-95.7046	-211.271	-95.7045	-115.561	-115.561	-95.7047	-211.271	-95.7046	-115.561	-115.561	-95.7048	-211.271	-95.7046	-115.561	-115.561	-95.7048	-211.271	-95.7045	-115.561	-115.561	-95.7046	-211.271	-95.7045	-115.561	-115.561	-95.7047	-211.271	-95.7045	-115.561	-115.561	-95.7047	-211.271	-95.7045	-115.561	-115.561
09_MeNH2-MeOH_1.05_dimer.out	-211.27	-95.7045	-115.561	-115.561	-95.7047	-211.27	-95.7046	-115.561	-115.561	-95.7046	-211.27	-95.7045	-115.561	-115.561	-95.7046	-211.27	-95.7045	-115.561	-115.561	-95.7047	-211.27	-95.7046	-115.561	-115.561	-95.7048	-211.271	-95.7046	-115.561	-115.561	-95.7047	-211.27	-95.7045	-115.561	-115.561	-95.7046	-211.27	-95.7045	-115.561	-115.561	-95.7047	-211.27	-95.7045	-115.561	-115.561	-95.7047	-211.27	-95.7045	-115.561	-115.561
09_MeNH2-MeOH_1.10_dimer.out	-211.27	-95.7045	-115.561	-115.561	-95.7047	-211.27	-95.7046	-115.561	-115.561	-95.7046	-211.27	-95.7045	-115.561	-115.561	-95.7046	-211.27	-95.7045	-115.561	-115.561	-95.7047	-211.27	-95.7046	-115.561	-115.561	-95.7048	-211.27	-95.7046	-115.561	-115.561	-95.7047	-211.27	-95.7045	-115.561	-115.561	-95.7045	-211.27	-95.7045	-115.561	-115.561	-95.7046	-211.27	-95.7045	-115.561	-115.561	-95.7047	-211.27	-95.7045	-115.561	-115.561
09_MeNH2-MeOH_1.25_dimer.out	-211.269	-95.7045	-115.561	-115.561	-95.7046	-211.269	-95.7046	-115.561	-115.561	-95.7046	-211.269	-95.7045	-115.561	-115.561	-95.7045	-211.269	-95.7045	-115.561	-115.561	-95.7046	-211.269	-95.7046	-115.561	-115.561	-95.7047	-211.269	-95.7046	-115.561	-115.561	-95.7047	-211.269	-95.7045	-115.561	-115.561	-95.7045	-211.269	-95.7045	-115.561	-115.561	-95.7046	-211.269	-95.7045	-115.561	-115.561	-95.7046	-211.269	-95.7045	-115.561	-115.561
09_MeNH2-MeOH_1.50_dimer.out	-211.267	-95.7045	-115.561	-115.561	-95.7046	-211.267	-95.7046	-115.561	-115.561	-95.7046	-211.267	-95.7045	-115.561	-115.561	-95.7045	-211.267	-95.7045	-115.561	-115.561	-95.7046	-211.268	-95.7046	-115.561	-115.561	-95.7047	-211.268	-95.7046	-115.561	-115.561	-95.7046	-211.267	-95.7045	-115.561	-115.561	-95.7045	-211.267	-95.7045	-115.561	-115.561	-95.7045	-211.267	-95.7045	-115.561	-115.561	-95.7046	-211.267	-95.7045	-115.561	-115.561
09_MeNH2-MeOH_2.00_dimer.out	-211.266	-95.7045	-115.561	-115.561	-95.7045	-211.266	-95.7046	-115.561	-115.561	-95.7046	-211.266	-95.7045	-115.561	-115.561	-95.7045	-211.266	-95.7045	-115.561	-115.561	-95.7046	-211.266	-95.7046	-115.561	-115.561	-95.7046	-211.266	-95.7046	-115.561	-115.561	-95.7046	-211.266	-95.7045	-115.561	-115.561	-95.7045	-211.266	-95.7045	-115.561	-115.561	-95.7045	-211.266	-95.7045	-115.561	-115.561	-95.7045	-211.266	-95.7045	-115.561	-115.561
10_MeNH2-MeNH2_0.90_dimer.out	-191.415	-95.7045	-95.7046	-95.705	-95.7049	-191.415	-95.7046	-95.7046	-95.7049	-95.7048	-191.415	-95.7045	-95.7045	-95.7049	-95.7048	-191.415	-95.7046	-95.7046	-95.705	-95.7049	-191.415	-95.7046	-95.7047	-95.7051	-95.705	-191.415	-95.7046	-95.7046	-95.705	-95.7049	-191.415	-95.7045	-95.7045	-95.7049	-95.7048	-191.415	-95.7045	-95.7046	-95.705	-95.7048	-191.415	-95.7045	-95.7046	-95.705	-95.7049	-191.415	-95.7045	-95.7046	-95.705
10_MeNH2-MeNH2_0.95_dimer.out	-191.416	-95.7045	-95.7046	-95.7049	-95.7048	-191.415	-95.7046	-95.7046	-95.7048	-95.7047	-191.416	-95.7045	-95.7045	-95.7048	-95.7047	-191.416	-95.7046	-95.7046	-95.7049	-95.7048	-191.416	-95.7046	-95.7047	-95.705	-95.7049	-191.416	-95.7046	-95.7046	-95.705	-95.7049	-191.416	-95.7045	-95.7045	-95.7048	-95.7047	-191.416	-95.7045	-95.7046	-95.7049	-95.7048	-191.416	-95.7045	-95.7046	-95.7049	-95.7048	-191.416	-95.7045	-95.7046	-95.7049
10_MeNH2-MeNH2_1.00_dimer.out	-191.416	-95.7045	-95.7046	-95.7049	-95.7048	-191.416	-95.7046	-95.7046	-95.7047	-95.7047	-191.416	-95.7045	-95.7045	-95.7048	-95.7047	-191.416	-95.7046	-95.7046	-95.7049	-95.7048	-191.416	-95.7046	-95.7047	-95.705	-95.7049	-191.416	-95.7046	-95.7046	-95.7049	-95.7048	-191.416	-95.7045	-95.7045	-95.7048	-95.7047	-191.416	-95.7045	-95.7046	-95.7048	-95.7047	-191.416	-95.7045	-95.7046	-95.7049	-95.7048	-191.416	-95.7045	-95.7046	-95.7048
10_MeNH2-MeNH2_1.05_dimer.out	-191.416	-95.7045	-95.7046	-95.7048	-95.7047	-191.415	-95.7046	-95.7046	-95.7047	-95.7047	-191.415	-95.7045	-95.7045	-95.7047	-95.7047	-191.416	-95.7046	-95.7046	-95.7048	-95.7047	-191.416	-95.7046	-95.7047	-95.7049	-95.7048	-191.416	-95.7046	-95.7046	-95.7049	-95.7048	-191.415	-95.7045	-95.7045	-95.7047	-95.7047	-191.416	-95.7045	-95.7046	-95.7048	-95.7047	-191.416	-95.7045	-95.7046	-95.7048	-95.7047	-191.416	-95.7045	-95.7046	-95.7048
10_MeNH2-MeNH2_1.10_dimer.out	-191.415	-95.7045	-95.7046	-95.7048	-95.7047	-191.415	-95.7046	-95.7046	-95.7047	-95.7046	-191.415	-95.7045	-95.7045	-95.7047	-95.7046	-191.415	-95.7046	-95.7046	-95.7048	-95.7047	-191.415	-95.7046	-95.7047	-95.7049	-95.7048	-191.415	-95.7046	-95.7046	-95.7048	-95.7047	-191.415	-95.7045	-95.7045	-95.7047	-95.7046	-191.415	-95.7045	-95.7046	-95.7048	-95.7047	-191.415	-95.7045	-95.7046	-95.7048	-95.7047	-191.415	-95.7045	-95.7046	-95.7048
10_MeNH2-MeNH2_1.25_dimer.out	-191.414	-95.7045	-95.7046	-95.7047	-95.7046	-191.413	-95.7046	-95.7046	-95.7047	-95.7046	-191.413	-95.7045	-95.7045	-95.7046	-95.7045	-191.414	-95.7046	-95.7046	-95.7047	-95.7047	-191.414	-95.7046	-95.7047	-95.7048	-95.7047	-191.414	-95.7046	-95.7046	-95.7048	-95.7047	-191.414	-95.7045	-95.7045	-95.7046	-95.7046	-191.414	-95.7045	-95.7046	-95.7047	-95.7046	-191.414	-95.7045	-95.7046	-95.7047	-95.7046	-191.414	-95.7045	-95.7046	-95.7047
10_MeNH2-MeNH2_1.50_dimer.out	-191.411	-95.7045	-95.7046	-95.7046	-95.7046	-191.411	-95.7046	-95.7046	-95.7046	-95.7046	-191.411	-95.7045	-95.7045	-95.7045	-95.7045	-191.411	-95.7046	-95.7046	-95.7046	-95.7046	-191.411	-95.7046	-95.7047	-95.7047	-95.7047	-191.411	-95.7046	-95.7046	-95.7047	-95.7046	-191.411	-95.7045	-95.7045	-95.7046	-95.7045	-191.411	-95.7045	-95.7046	-95.7046	-95.7045	-191.411	-95.7045	-95.7046	-95.7046	-95.7046	-191.411	-95.7045	-95.7046	-95.7046
10_MeNH2-MeNH2_2.00_dimer.out	-191.41	-95.7045	-95.7046	-95.7046	-95.7045	-191.41	-95.7046	-95.7046	-95.7046	-95.7046	-191.41	-95.7045	-95.7045	-95.7045	-95.7045	-191.41	-95.7046	-95.7046	-95.7046	-95.7046	-191.41	-95.7046	-95.7047	-95.7047	-95.7046	-191.41	-95.7046	-95.7046	-95.7046	-95.7046	-191.41	-95.7045	-95.7045	-95.7045	-95.7045	-191.41	-95.7045	-95.7046	-95.7046	-95.7045	-191.41	-95.7045	-95.7046	-95.7046	-95.7045	-191.41	-95.7045	-95.7046	-95.7046
11_MeNH2-Peptide_0.90_dimer.out	-343.853	-95.7045	-248.141	-248.141	-95.705	-343.852	-95.7045	-248.14	-248.14	-95.7048	-343.853	-95.7045	-248.14	-248.141	-95.7049	-343.853	-95.7045	-248.14	-248.141	-95.705	-343.852	-95.7046	-248.14	-248.14	-95.7051	-343.853	-95.7046	-248.141	-248.141	-95.705	-343.853	-95.7045	-248.14	-248.141	-95.7048	-343.853	-95.7045	-248.141	-248.141	-95.7049	-343.853	-95.7045	-248.141	-248.141	-95.705	-343.853	-95.7045	-248.141	-248.141
11_MeNH2-Peptide_0.95_dimer.out	-343.854	-95.7045	-248.141	-248.141	-95.7049	-343.853	-95.7045	-248.14	-248.14	-95.7047	-343.854	-95.7045	-248.14	-248.141	-95.7048	-343.854	-95.7045	-248.14	-248.141	-95.7049	-343.853	-95.7046	-248.14	-248.14	-95.705	-343.854	-95.7046	-248.141	-248.141	-95.705	-343.853	-95.7045	-248.14	-248.141	-95.7048	-343.854	-95.7045	-248.141	-248.141	-95.7048	-343.854	-95.7045	-248.141	-248.141	-95.7048	-343.854	-95.7045	-248.141	-248.141
11_MeNH2-Peptide_1.00_dimer.out	-343.854	-95.7045	-248.141	-248.141	-95.7049	-343.853	-95.7045	-248.14	-248.14	-95.7047	-343.854	-95.7045	-248.14	-248.141	-95.7047	-343.854	-95.7045	-248.14	-248.141	-95.7049	-343.853	-95.7046	-248.14	-248.14	-95.705	-343.854	-95.7046	-248.141	-248.141	-95.7049	-343.854	-95.7045	-248.14	-248.141	-95.7047	-343.854	-95.7045	-248.141	-248.141	-95.7048	-343.854	-95.7045	-248.141	-248.141	-95.7048	-343.854	-95.7045	-248.141	-248.141
11_MeNH2-Peptide_1.05_dimer.out	-343.854	-95.7045	-248.141	-248.141	-95.7048	-343.853	-95.7045	-248.14	-248.14	-95.7047	-343.853	-95.7045	-248.14	-248.141	-95.7047	-343.853	-95.7045	-248.14	-248.141	-95.7048	-343.852	-95.7046	-248.14	-248.14	-95.7049	-343.854	-95.7046	-248.141	-248.141	-95.7049	-343.853	-95.7045	-248.14	-248.141	-95.7047	-343.854	-95.7045	-248.141	-248.141	-95.7048	-343.854	-95.7045	-248.141	-248.141	-95.7048	-343.854	-95.7045	-248.141	-248.141
11_MeNH2-Peptide_1.10_dimer.out	-343.853	-95.7045	-248.141	-248.141	-95.7048	-343.852	-95.7045	-248.14	-248.14	-95.7046	-343.853	-95.7045	-248.14	-248.141	-95.7047	-343.853	-95.7045	-248.14	-248.141	-95.7048	-343.852	-95.7046	-248.14	-248.14	-95.7049	-343.853	-95.7046	-248.141	-248.141	-95.7048	-343.853	-95.7045	-248.14	-248.14	-95.7047	-343.853	-95.7045	-248.141	-248.141	-95.7048	-343.853	-95.7045	-248.141	-248.141	-95.7048	-343.853	-95.7045	-248.141	-248.141
11_MeNH2-Peptide_1.25_dimer.out	-343.851	-95.7045	-248.141	-248.141	-95.7047	-343.85	-95.7045	-248.14	-248.14	-95.7046	-343.85	-95.7045	-248.14	-248.141	-95.7045	-343.85	-95.7045	-248.14	-248.141	-95.7047	-343.849	-95.7046	-248.14	-248.14	-95.7048	-343.85	-95.7046	-248.141	-248.141	-95.7047	-343.85	-95.7045	-248.14	-248.14	-95.7046	-343.85	-95.7045	-248.141	-248.141	-95.7046	-343.85	-95.7045	-248.141	-248.141	-95.7046	-343.85	-95.7045	-248.141	-248.141
11_MeNH2-Peptide_1.50_dimer.out	-343.848	-95.7045	-248.141	-248.141	-95.7046	-343.847	-95.7045	-248.14	-248.14	-95.7046	-343.847	-95.7045	-248.14	-248.14	-95.7045	-343.847	-95.7045	-248.14	-248.14	-95.7046	-343.846	-95.7046	-248.14	-248.14	-95.7047	-343.848	-95.7046	-248.141	-248.141	-95.7046	-343.847	-95.7045	-248.14	-248.14	-95.7045	-343.847	-95.7045	-248.141	-248.141	-95.7046	-343.847	-95.7045	-248.141	-248.141	-95.7046	-343.848	-95.7045	-248.141	-248.141
11_MeNH2-Peptide_2.00_dimer.out	-343.846	-95.7045	-248.141	-248.141	-95.7045	-343.845	-95.7045	-248.14	-248.14	-95.7045	-343.846	-95.7045	-248.14	-248.14	-95.7045	-343.846	-95.7045	-248.14	-248.14	-95.7045	-343.845	-95.7046	-248.14	-248.14	-95.7046	-343.846	-95.7046	-248.141	-248.141	-95.7046	-343.845	-95.7045	-248.14	-248.14	-95.7045	-343.846	-95.7045	-248.141	-248.141	-95.7045	-343.846	-95.7045	-248.141	-248.141	-95.7045	-343.846	-95.7045	-248.141	-248.141
12_MeNH2-Water_0.90_dimer.out	-172.057	-95.7046	-76.3414	-76.3419	-95.7051	-172.057	-95.7046	-76.3414	-76.3418	-95.705	-172.057	-95.7045	-76.3414	-76.3419	-95.705	-172.057	-95.7046	-76.3414	-76.3419	-95.7051	-172.057	-95.7047	-76.3415	-76.342	-95.7052	-172.057	-95.7046	-76.3415	-76.3419	-95.7051	-172.057	-95.7045	-76.3414	-76.3418	-95.7051	-172.057	-95.7046	-76.3414	-76.3419	-95.7051	-172.057	-95.7046	-76.3414	-76.3419	-95.7051	-172.057	-95.7046	-76.3414	-76.3419
12_MeNH2-Water_0.95_dimer.out	-172.058	-95.7046	-76.3414	-76.3418	-95.705	-172.057	-95.7046	-76.3414	-76.3418	-95.7049	-172.058	-95.7045	-76.3414	-76.3418	-95.7049	-172.058	-95.7046	-76.3414	-76.3419	-95.705	-172.058	-95.7047	-76.3415	-76.3419	-95.7051	-172.058	-95.7046	-76.3415	-76.3419	-95.705	-172.058	-95.7045	-76.3414	-76.3418	-95.705	-172.058	-95.7046	-76.3414	-76.3418	-95.705	-172.058	-95.7046	-76.3414	-76.3418	-95.705	-172.058	-95.7046	-76.3414	-76.3418
12_MeNH2-Water_1.00_dimer.out	-172.058	-95.7046	-76.3414	-76.3418	-95.7049	-172.058	-95.7046	-76.3414	-76.3417	-95.7049	-172.058	-95.7045	-76.3414	-76.3418	-95.7049	-172.058	-95.7046	-76.3414	-76.3418	-95.705	-172.058	-95.7047	-76.3415	-76.3419	-95.705	-172.058	-95.7046	-76.3415	-76.3418	-95.705	-172.058	-95.7045	-76.3414	-76.3417	-95.7049	-172.058	-95.7046	-76.3414	-76.3417	-95.7049	-172.058	-95.7046	-76.3414	-76.3418	-95.7049	-172.058	-95.7046	-76.3414	-76.3418
12_MeNH2-Water_1.05_dimer.out	-172.057	-95.7046	-76.3414	-76.3417	-95.7049	-172.057	-95.7046	-76.3414	-76.3417	-95.7048	-172.057	-95.7045	-76.3414	-76.3417	-95.7048	-172.057	-95.7046	-76.3414	-76.3418	-95.7049	-172.057	-95.7047	-76.3415	-76.3418	-95.705	-172.057	-95.7046	-76.3415	-76.3418	-95.7049	-172.057	-95.7045	-76.3414	-76.3416	-95.7048	-172.057	-95.7046	-76.3414	-76.3417	-95.7049	-172.057	-95.7046	-76.3414	-76.3417	-95.7049	-172.057	-95.7046	-76.3414	-76.3417
12_MeNH2-Water_1.10_dimer.out	-172.057	-95.7046	-76.3414	-76.3417	-95.7048	-172.057	-95.7046	-76.3414	-76.3416	-95.7048	-172.057	-95.7045	-76.3414	-76.3417	-95.7048	-172.057	-95.7046	-76.3414	-76.3417	-95.7048	-172.057	-95.7047	-76.3415	-76.3418	-95.7049	-172.057	-95.7046	-76.3415	-76.3417	-95.7049	-172.057	-95.7045	-76.3414	-76.3416	-95.7048	-172.057	-95.7046	-76.3414	-76.3416	-95.7048	-172.057	-95.7046	-76.3414	-76.3417	-95.7048	-172.057	-95.7046	-76.3414	-76.3417
12_MeNH2-Water_1.25_dimer.out	-172.054	-95.7046	-76.3414	-76.3416	-95.7047	-172.054	-95.7046	-76.3414	-76.3416	-95.7047	-172.054	-95.7045	-76.3414	-76.3416	-95.7047	-172.054	-95.7046	-76.3414	-76.3416	-95.7047	-172.054	-95.7047	-76.3415	-76.3417	-95.7048	-172.054	-95.7046	-76.3415	-76.3416	-95.7048	-172.054	-95.7045	-76.3414	-76.3415	-95.7047	-172.054	-95.7046	-76.3414	-76.3415	-95.7047	-172.054	-95.7046	-76.3414	-76.3416	-95.7047	-172.054	-95.7046	-76.3414	-76.3416
12_MeNH2-Water_1.50_dimer.out	-172.051	-95.7046	-76.3414	-76.3415	-95.7047	-172.051	-95.7046	-76.3414	-76.3415	-95.7046	-172.051	-95.7045	-76.3414	-76.3415	-95.7046	-172.051	-95.7046	-76.3414	-76.3415	-95.7047	-172.051	-95.7047	-76.3415	-76.3416	-95.7047	-172.051	-95.7046	-76.3415	-76.3415	-95.7047	-172.051	-95.7045	-76.3414	-76.3414	-95.7046	-172.051	-95.7046	-76.3414	-76.3414	-95.7047	-172.051	-95.7046	-76.3414	-76.3415	-95.7047	-172.051	-95.7046	-76.3414	-76.3415
12_MeNH2-Water_2.00_dimer.out	-172.048	-95.7046	-76.3414	-76.3414	-95.7046	-172.048	-95.7046	-76.3414	-76.3415	-95.7046	-172.048	-95.7045	-76.3414	-76.3414	-95.7045	-172.048	-95.7046	-76.3414	-76.3415	-95.7046	-172.048	-95.7047	-76.3415	-76.3415	-95.7047	-172.048	-95.7046	-76.3415	-76.3415	-95.7047	-172.048	-95.7045	-76.3414	-76.3414	-95.7046	-172.048	-95.7046	-76.3414	-76.3414	-95.7046	-172.048	-95.7046	-76.3414	-76.3414	-95.7046	-172.048	-95.7046	-76.3414	-76.3414
13_Peptide-MeOH_0.90_dimer.out	-363.711	-248.141	-115.561	-115.562	-248.141	-363.71	-248.14	-115.561	-115.561	-248.14	-363.711	-248.14	-115.561	-115.562	-248.141	-363.711	-248.14	-115.561	-115.562	-248.141	-363.71	-248.14	-115.561	-115.562	-248.14	-363.711	-248.141	-115.561	-115.562	-248.141	-363.711	-248.14	-115.561	-115.562	-248.141	-363.711	-248.14	-115.561	-115.562	-248.141	-363.711	-248.141	-115.561	-115.562	-248.141	-363.711	-248.141	-115.561	-115.562
13_Peptide-MeOH_0.95_dimer.out	-363.712	-248.141	-115.561	-115.562	-248.141	-363.711	-248.14	-115.561	-115.561	-248.14	-363.711	-248.14	-115.561	-115.562	-248.141	-363.712	-248.14	-115.561	-115.562	-248.141	-363.71	-248.14	-115.561	-115.562	-248.14	-363.712	-248.141	-115.561	-115.562	-248.141	-363.711	-248.14	-115.561	-115.562	-248.141	-363.712	-248.14	-115.561	-115.562	-248.141	-363.712	-248.141	-115.561	-115.562	-248.141	-363.712	-248.141	-115.561	-115.562
13_Peptide-MeOH_1.00_dimer.out	-363.712	-248.141	-115.561	-115.562	-248.141	-363.711	-248.14	-115.561	-115.561	-248.14	-363.711	-248.14	-115.561	-115.561	-248.141	-363.712	-248.14	-115.561	-115.562	-248.141	-363.711	-248.14	-115.561	-115.562	-248.14	-363.712	-248.141	-115.561	-115.562	-248.141	-363.711	-248.14	-115.561	-115.561	-248.14	-363.712	-248.14	-115.561	-115.562	-248.141	-363.712	-248.141	-115.561	-115.562	-248.141	-363.712	-248.141	-115.561	-115.562
13_Peptide-MeOH_1.05_dimer.out	-363.712	-248.141	-115.561	-115.562	-248.141	-363.711	-248.14	-115.561	-115.561	-248.14	-363.711	-248.14	-115.561	-115.561	-248.141	-363.711	-248.14	-115.561	-115.562	-248.141	-363.71	-248.14	-115.561	-115.562	-248.14	-363.712	-248.141	-115.561	-115.562	-248.141	-363.711	-248.14	-115.561	-115.561	-248.14	-363.711	-248.14	-115.561	-115.561	-248.141	-363.712	-248.141	-115.561	-115.562	-248.141	-363.712	-248.141	-115.561	-115.561
13_Peptide-MeOH_1.10_dimer.out	-363.711	-248.141	-115.561	-115.561	-248.141	-363.71	-248.14	-115.561	-115.561	-248.14	-363.711	-248.14	-115.561	-115.561	-248.141	-363.711	-248.14	-115.561	-115.561	-248.141	-363.71	-248.14	-115.561	-115.561	-248.14	-363.711	-248.141	-115.561	-115.562	-248.141	-363.711	-248.14	-115.561	-115.561	-248.14	-363.711	-248.14	-115.561	-115.561	-248.141	-363.711	-248.141	-115.561	-115.561	-248.141	-363.711	-248.141	-115.561	-115.561
13_Peptide-MeOH_1.25_dimer.out	-363.709	-248.141	-115.561	-115.561	-248.141	-363.708	-248.14	-115.561	-115.561	-248.14	-363.709	-248.14	-115.561	-115.561	-248.14	-363.709	-248.14	-115.561	-115.561	-248.141	-363.708	-248.14	-115.561	-115.561	-248.14	-363.709	-248.141	-115.561	-115.561	-248.141	-363.709	-248.14	-115.561	-115.561	-248.14	-363.709	-248.14	-115.561	-115.561	-248.141	-363.709	-248.141	-115.561	-115.561	-248.141	-363.709	-248.141	-115.561	-115.561
13_Peptide-MeOH_1.50_dimer.out	-363.707	-248.141	-115.561	-115.561	-248.141	-363.706	-248.14	-115.561	-115.561	-248.14	-363.706	-248.14	-115.561	-115.561	-248.14	-363.706	-248.14	-115.561	-115.561	-248.14	-363.705	-248.14	-115.561	-115.561	-248.14	-363.707	-248.141	-115.561	-115.561	-248.141	-363.706	-248.14	-115.561	-115.561	-248.14	-363.706	-248.14	-115.561	-115.561	-248.141	-363.707	-248.141	-115.561	-115.561	-248.141	-363.707	-248.141	-115.561	-115.561
13_Peptide-MeOH_2.00_dimer.out	-363.704	-248.141	-115.561	-115.561	-248.141	-363.703	-248.14	-115.561	-115.561	-248.14	-363.704	-248.14	-115.561	-115.561	-248.14	-363.704	-248.14	-115.561	-115.561	-248.14	-363.703	-248.14	-115.561	-115.561	-248.14	-363.704	-248.141	-115.561	-115.561	-248.141	-363.703	-248.14	-115.561	-115.561	-248.14	-363.704	-248.14	-115.561	-115.561	-248.14	-363.704	-248.141	-115.561	-115.561	-248.141	-363.704	-248.141	-115.561	-115.561
14_Peptide-MeNH2_0.90_dimer.out	-343.856	-248.14	-95.7046	-95.7053	-248.141	-343.855	-248.14	-95.7046	-95.705	-248.14	-343.856	-248.14	-95.7045	-95.7051	-248.141	-343.856	-248.14	-95.7046	-95.7053	-248.141	-343.855	-248.139	-95.7047	-95.7053	-248.14	-343.856	-248.141	-95.7046	-95.7053	-248.141	-343.856	-248.14	-95.7045	-95.7052	-248.14	-343.856	-248.14	-95.7046	-95.7052	-248.141	-343.856	-248.14	-95.7046	-95.7052	-248.141	-343.856	-248.14	-95.7046	-95.7052
14_Peptide-MeNH2_0.95_dimer.out	-343.857	-248.14	-95.7046	-95.7052	-248.141	-343.856	-248.14	-95.7046	-95.7049	-248.14	-343.857	-248.14	-95.7045	-95.705	-248.141	-343.857	-248.14	-95.7046	-95.7052	-248.141	-343.856	-248.139	-95.7047	-95.7052	-248.14	-343.857	-248.141	-95.7046	-95.7052	-248.141	-343.857	-248.14	-95.7045	-95.7051	-248.14	-343.857	-248.14	-95.7046	-95.7051	-248.141	-343.857	-248.14	-95.7046	-95.7051	-248.141	-343.857	-248.14	-95.7046	-95.7051
14_Peptide-MeNH2_1.00_dimer.out	-343.857	-248.14	-95.7046	-95.7051	-248.141	-343.856	-248.14	-95.7046	-95.7049	-248.14	-343.857	-248.14	-95.7045	-95.7049	-248.141	-343.857	-248.14	-95.7046	-95.7051	-248.141	-343.856	-248.139	-95.7047	-95.7052	-248.14	-343.857	-248.141	-95.7046	-95.7051	-248.141	-343.857	-248.14	-95.7045	-95.705	-248.14	-343.857	-248.14	-95.7046	-95.705	-248.141	-343.857	-248.14	-95.7046	-95.705	-248.141	-343.857	-248.14	-95.7046	-95.705
14_Peptide-MeNH2_1.05_dimer.out	-343.857	-248.14	-95.7046	-95.705	-248.141	-343.856	-248.14	-95.7046	-95.7048	-248.14	-343.856	-248.14	-95.7045	-95.7048	-248.14	-343.857	-248.14	-95.7046	-95.705	-248.141	-343.856	-248.139	-95.7047	-95.7051	-248.14	-343.857	-248.141	-95.7046	-95.705	-248.141	-343.856	-248.14	-95.7045	-95.7049	-248.14	-343.857	-248.14	-95.7046	-95.705	-248.141	-343.857	-248.14	-95.7046	-95.705	-248.141	-343.857	-248.14	-95.7046	-95.705
14_Peptide-MeNH2_1.10_dimer.out	-343.857	-248.14	-95.7046	-95.705	-248.141	-343.855	-248.14	-95.7046	-95.7048	-248.14	-343.856	-248.14	-95.7045	-95.7048	-248.14	-343.856	-248.14	-95.7046	-95.705	-248.14	-343.855	-248.139	-95.7047	-95.705	-248.14	-343.856	-248.141	-95.7046	-95.705	-248.141	-343.856	-248.14	-95.7045	-95.7049	-248.14	-343.856	-248.14	-95.7046	-95.7049	-248.141	-343.856	-248.14	-95.7046	-95.7049	-248.141	-343.856	-248.14	-95.7046	-95.7049
14_Peptide-MeNH2_1.25_dimer.out	-343.854	-248.14	-95.7046	-95.7048	-248.141	-343.853	-248.14	-95.7046	-95.7047	-248.14	-343.854	-248.14	-95.7045	-95.7047	-248.14	-343.854	-248.14	-95.7046	-95.7048	-248.14	-343.853	-248.139	-95.7047	-95.7049	-248.14	-343.854	-248.141	-95.7046	-95.7049	-248.141	-343.854	-248.14	-95.7045	-95.7048	-248.14	-343.854	-248.14	-95.7046	-95.7048	-248.14	-343.854	-248.14	-95.7046	-95.7048	-248.141	-343.854	-248.14	-95.7046	-95.7048
14_Peptide-MeNH2_1.50_dimer.out	-343.851	-248.14	-95.7046	-95.7047	-248.141	-343.85	-248.14	-95.7046	-95.7047	-248.14	-343.85	-248.14	-95.7045	-95.7046	-248.14	-343.851	-248.14	-95.7046	-95.7047	-248.14	-343.85	-248.139	-95.7047	-95.7048	-248.139	-343.851	-248.141	-95.7046	-95.7048	-248.141	-343.85	-248.14	-95.7045	-95.7047	-248.14	-343.851	-248.14	-95.7046	-95.7047	-248.14	-343.851	-248.14	-95.7046	-95.7047	-248.141	-343.851	-248.14	-95.7046	-95.7047
14_Peptide-MeNH2_2.00_dimer.out	-343.848	-248.14	-95.7046	-95.7047	-248.141	-343.847	-248.14	-95.7046	-95.7046	-248.14	-343.847	-248.14	-95.7045	-95.7046	-248.14	-343.847	-248.14	-95.7046	-95.7047	-248.14	-343.846	-248.139	-95.7047	-95.7047	-248.139	-343.848	-248.141	-95.7046	-95.7047	-248.141	-343.847	-248.14	-95.7045	-95.7046	-248.14	-343.847	-248.14	-95.7046	-95.7046	-248.14	-343.847	-248.14	-95.7046	-95.7046	-248.14	-343.848	-248.14	-95.7046	-95.7046
15_Peptide-Peptide_0.90_dimer.out	-496.294	-248.14	-248.14	-248.141	-248.141	-496.292	-248.14	-248.14	-248.14	-248.14	-496.293	-248.14	-248.14	-248.141	-248.141	-496.293	-248.14	-248.14	-248.141	-248.141	-496.291	-248.139	-248.139	-248.14	-248.14	-496.294	-248.14	-248.14	-248.141	-248.141	-496.293	-248.14	-248.14	-248.141	-248.141	-496.294	-248.14	-248.14	-248.141	-248.141	-496.294	-248.14	-248.14	-248.141	-248.141	-496.294	-248.14	-248.14	-248.141
15_Peptide-Peptide_0.95_dimer.out	-496.295	-248.14	-248.14	-248.141	-248.141	-496.293	-248.14	-248.14	-248.14	-248.14	-496.294	-248.14	-248.14	-248.141	-248.141	-496.294	-248.14	-248.14	-248.141	-248.141	-496.292	-248.139	-248.139	-248.14	-248.14	-496.295	-248.14	-248.14	-248.141	-248.141	-496.294	-248.14	-248.14	-248.141	-248.14	-496.295	-248.14	-248.14	-248.141	-248.141	-496.295	-248.14	-248.14	-248.141	-248.141	-496.295	-248.14	-248.14	-248.141
15_Peptide-Peptide_1.00_dimer.out	-496.295	-248.14	-248.14	-248.141	-248.141	-496.293	-248.14	-248.14	-248.14	-248.14	-496.294	-248.14	-248.14	-248.141	-248.141	-496.294	-248.14	-248.14	-248.141	-248.141	-496.292	-248.139	-248.139	-248.14	-248.14	-496.295	-248.14	-248.14	-248.141	-248.141	-496.294	-248.14	-248.14	-248.14	-248.14	-496.295	-248.14	-248.14	-248.141	-248.141	-496.295	-248.14	-248.14	-248.141	-248.141	-496.295	-248.14	-248.14	-248.141
15_Peptide-Peptide_1.05_dimer.out	-496.295	-248.14	-248.14	-248.141	-248.141	-496.293	-248.14	-248.14	-248.14	-248.14	-496.294	-248.14	-248.14	-248.141	-248.14	-496.294	-248.14	-248.14	-248.141	-248.141	-496.292	-248.139	-248.139	-248.14	-248.14	-496.295	-248.14	-248.14	-248.141	-248.141	-496.294	-248.14	-248.14	-248.14	-248.14	-496.294	-248.14	-248.14	-248.141	-248.141	-496.295	-248.14	-248.14	-248.141	-248.141	-496.295	-248.14	-248.14	-248.141
15_Peptide-Peptide_1.10_dimer.out	-496.294	-248.14	-248.14	-248.141	-248.141	-496.292	-248.14	-248.14	-248.14	-248.14	-496.293	-248.14	-248.14	-248.14	-248.14	-496.293	-248.14	-248.14	-248.141	-248.14	-496.291	-248.139	-248.139	-248.14	-248.14	-496.294	-248.14	-248.14	-248.141	-248.141	-496.293	-248.14	-248.14	-248.14	-248.14	-496.294	-248.14	-248.14	-248.141	-248.141	-496.294	-248.14	-248.14	-248.141	-248.141	-496.294	-248.14	-248.14	-248.141
15_Peptide-Peptide_1.25_dimer.out	-496.292	-248.14	-248.14	-248.141	-248.141	-496.29	-248.14	-248.14	-248.14	-248.14	-496.291	-248.14	-248.14	-248.14	-248.14	-496.291	-248.14	-248.14	-248.14	-248.14	-496.289	-248.139	-248.139	-248.14	-248.14	-496.292	-248.14	-248.14	-248.141	-248.141	-496.291	-248.14	-248.14	-248.14	-248.14	-496.291	-248.14	-248.14	-248.141	-248.14	-496.292	-248.14	-248.14	-248.141	-248.141	-496.292	-248.14	-248.14	-248.141
15_Peptide-Peptide_1.50_dimer.out	-496.288	-248.14	-248.14	-248.141	-248.141	-496.287	-248.14	-248.14	-248.14	-248.14	-496.287	-248.14	-248.14	-248.14	-248.14	-496.287	-248.14	-248.14	-248.14	-248.14	-496.286	-248.139	-248.139	-248.139	-248.139	-496.288	-248.14	-248.14	-248.141	-248.141	-496.287	-248.14	-248.14	-248.14	-248.14	-496.288	-248.14	-248.14	-248.14	-248.14	-496.288	-248.14	-248.14	-248.141	-248.141	-496.288	-248.14	-248.14	-248.141
15_Peptide-Peptide_2.00_dimer.out	-496.284	-248.14	-248.14	-248.141	-248.14	-496.283	-248.14	-248.14	-248.14	-248.14	-496.283	-248.14	-248.14	-248.14	-248.14	-496.283	-248.14	-248.14	-248.14	-248.14	-496.281	-248.139	-248.139	-248.139	-248.139	-496.284	-248.14	-248.14	-248.141	-248.14	-496.283	-248.14	-248.14	-248.14	-248.14	-496.283	-248.14	-248.14	-248.14	-248.14	-496.284	-248.14	-248.14	-248.14	-248.14	-496.284	-248.14	-248.14	-248.141
16_Peptide-Water_0.90_dimer.out	-324.49	-248.141	-76.3415	-76.3421	-248.141	-324.489	-248.14	-76.3416	-76.3419	-248.14	-324.489	-248.14	-76.3415	-76.3419	-248.141	-324.489	-248.14	-76.3416	-76.3421	-248.141	-324.489	-248.139	-76.3416	-76.3421	-248.14	-324.49	-248.141	-76.3416	-76.3421	-248.141	-324.489	-248.14	-76.3415	-76.342	-248.14	-324.49	-248.14	-76.3415	-76.342	-248.141	-324.49	-248.14	-76.3415	-76.342	-248.141	-324.49	-248.141	-76.3415	-76.342
16_Peptide-Water_0.95_dimer.out	-324.49	-248.141	-76.3415	-76.342	-248.141	-324.49	-248.14	-76.3416	-76.3418	-248.14	-324.49	-248.14	-76.3415	-76.3419	-248.14	-324.49	-248.14	-76.3416	-76.342	-248.14	-324.489	-248.139	-76.3416	-76.3421	-248.14	-324.49	-248.141	-76.3416	-76.342	-248.141	-324.49	-248.14	-76.3415	-76.3419	-248.14	-324.49	-248.14	-76.3415	-76.3419	-248.141	-324.49	-248.14	-76.3415	-76.342	-248.141	-324.49	-248.141	-76.3415	-76.342
16_Peptide-Water_1.00_dimer.out	-324.491	-248.141	-76.3415	-76.3419	-248.141	-324.49	-248.14	-76.3416	-76.3418	-248.14	-324.49	-248.14	-76.3415	-76.3418	-248.14	-324.49	-248.14	-76.3416	-76.342	-248.14	-324.489	-248.139	-76.3416	-76.342	-248.14	-324.491	-248.141	-76.3416	-76.342	-248.141	-324.49	-248.14	-76.3415	-76.3419	-248.14	-324.49	-248.14	-76.3415	-76.3419	-248.141	-324.49	-248.14	-76.3415	-76.3419	-248.141	-324.491	-248.141	-76.3415	-76.3419
16_Peptide-Water_1.05_dimer.out	-324.49	-248.141	-76.3415	-76.3419	-248.141	-324.489	-248.14	-76.3416	-76.3418	-248.14	-324.49	-248.14	-76.3415	-76.3418	-248.14	-324.49	-248.14	-76.3416	-76.3419	-248.14	-324.489	-248.139	-76.3416	-76.342	-248.14	-324.49	-248.141	-76.3416	-76.3419	-248.141	-324.49	-248.14	-76.3415	-76.3418	-248.14	-324.49	-248.14	-76.3415	-76.3418	-248.14	-324.49	-248.14	-76.3415	-76.3419	-248.141	-324.49	-248.141	-76.3415	-76.3419
16_Peptide-Water_1.10_dimer.out	-324.49	-248.141	-76.3415	-76.3419	-248.141	-324.489	-248.14	-76.3416	-76.3418	-248.14	-324.489	-248.14	-76.3415	-76.3418	-248.14	-324.489	-248.14	-76.3416	-76.3419	-248.14	-324.489	-248.139	-76.3416	-76.3419	-248.14	-324.49	-248.141	-76.3416	-76.3419	-248.141	-324.489	-248.14	-76.3415	-76.3418	-248.14	-324.49	-248.14	-76.3415	-76.3418	-248.14	-324.49	-248.14	-76.3415	-76.3418	-248.141	-324.49	-248.141	-76.3415	-76.3418
16_Peptide-Water_1.25_dimer.out	-324.488	-248.141	-76.3415	-76.3418	-248.141	-324.488	-248.14	-76.3416	-76.3417	-248.14	-324.488	-248.14	-76.3415	-76.3417	-248.14	-324.488	-248.14	-76.3416	-76.3418	-248.14	-324.487	-248.139	-76.3416	-76.3419	-248.139	-324.488	-248.141	-76.3416	-76.3418	-248.141	-324.488	-248.14	-76.3415	-76.3417	-248.14	-324.488	-248.14	-76.3415	-76.3417	-248.14	-324.488	-248.14	-76.3415	-76.3417	-248.141	-324.488	-248.141	-76.3415	-76.3417
16_Peptide-Water_1.50_dimer.out	-324.486	-248.141	-76.3415	-76.3417	-248.141	-324.485	-248.14	-76.3416	-76.3417	-248.14	-324.486	-248.14	-76.3415	-76.3416	-248.14	-324.486	-248.14	-76.3416	-76.3417	-248.14	-324.485	-248.139	-76.3416	-76.3418	-248.139	-324.486	-248.141	-76.3416	-76.3417	-248.141	-324.485	-248.14	-76.3415	-76.3416	-248.14	-324.486	-248.14	-76.3415	-76.3416	-248.14	-324.486	-248.14	-76.3415	-76.3417	-248.141	-324.486	-248.141	-76.3415	-76.3417
16_Peptide-Water_2.00_dimer.out	-324.484	-248.141	-76.3415	-76.3416	-248.141	-324.483	-248.14	-76.3416	-76.3416	-248.14	-324.484	-248.14	-76.3415	-76.3416	-248.14	-324.484	-248.14	-76.3416	-76.3416	-248.14	-324.483	-248.139	-76.3416	-76.3417	-248.139	-324.484	-248.141	-76.3416	-76.3416	-248.141	-324.483	-248.14	-76.3415	-76.3415	-248.14	-324.484	-248.14	-76.3415	-76.3416	-248.14	-324.484	-248.14	-76.3415	-76.3416	-248.141	-324.484	-248.141	-76.3415	-76.3416
17_Uracil-Uracil_BP_0.90_dimer.out	-828.437	-414.205	-414.206	-414.207	-414.207	-828.433	-414.204	-414.204	-414.205	-414.205	-828.435	-414.205	-414.205	-414.206	-414.206	-828.435	-414.204	-414.205	-414.206	-414.206	-828.43	-414.202	-414.202	-414.204	-414.204	-828.437	-414.205	-414.205	-414.207	-414.207	-828.434	-414.204	-414.204	-414.206	-414.206	-828.436	-414.205	-414.205	-414.206	-414.206	-828.437	-414.205	-414.205	-414.207	-414.207	-828.437	-414.205	-414.206	-414.207
17_Uracil-Uracil_BP_0.95_dimer.out	-828.439	-414.205	-414.206	-414.207	-414.207	-828.435	-414.204	-414.204	-414.205	-414.205	-828.437	-414.205	-414.205	-414.206	-414.206	-828.436	-414.204	-414.205	-414.206	-414.206	-828.432	-414.202	-414.202	-414.204	-414.203	-828.438	-414.205	-414.205	-414.206	-414.206	-828.436	-414.204	-414.204	-414.205	-414.205	-828.438	-414.205	-414.205	-414.206	-414.206	-828.439	-414.205	-414.205	-414.206	-414.206	-828.439	-414.205	-414.206	-414.207
17_Uracil-Uracil_BP_1.00_dimer.out	-828.439	-414.205	-414.206	-414.207	-414.206	-828.435	-414.204	-414.204	-414.205	-414.204	-828.437	-414.205	-414.205	-414.206	-414.206	-828.437	-414.204	-414.205	-414.206	-414.205	-828.432	-414.202	-414.202	-414.203	-414.203	-828.439	-414.205	-414.205	-414.206	-414.206	-828.436	-414.204	-414.204	-414.205	-414.205	-828.438	-414.205	-414.205	-414.206	-414.206	-828.439	-414.205	-414.205	-414.206	-414.206	-828.439	-414.205	-414.206	-414.206
17_Uracil-Uracil_BP_1.05_dimer.out	-828.439	-414.205	-414.206	-414.206	-414.206	-828.435	-414.204	-414.204	-414.205	-414.204	-828.437	-414.205	-414.205	-414.206	-414.205	-828.436	-414.204	-414.205	-414.205	-414.205	-828.432	-414.202	-414.202	-414.203	-414.203	-828.438	-414.205	-414.205	-414.206	-414.206	-828.436	-414.204	-414.204	-414.205	-414.205	-828.437	-414.205	-414.205	-414.206	-414.206	-828.438	-414.205	-414.205	-414.206	-414.206	-828.439	-414.205	-414.206	-414.206
17_Uracil-Uracil_BP_1.10_dimer.out	-828.438	-414.205	-414.206	-414.206	-414.206	-828.433	-414.204	-414.204	-414.204	-414.204	-828.436	-414.205	-414.205	-414.205	-414.205	-828.435	-414.204	-414.205	-414.205	-414.205	-828.43	-414.202	-414.202	-414.203	-414.203	-828.437	-414.205	-414.205	-414.206	-414.206	-828.435	-414.204	-414.204	-414.205	-414.205	-828.436	-414.205	-414.205	-414.206	-414.206	-828.437	-414.205	-414.205	-414.206	-414.206	-828.438	-414.205	-414.206	-414.206
17_Uracil-Uracil_BP_1.25_dimer.out	-828.433	-414.205	-414.206	-414.206	-414.206	-828.429	-414.204	-414.204	-414.204	-414.204	-828.431	-414.205	-414.205	-414.205	-414.205	-828.43	-414.204	-414.205	-414.205	-414.205	-828.426	-414.202	-414.202	-414.203	-414.203	-828.432	-414.205	-414.205	-414.206	-414.206	-828.43	-414.204	-414.204	-414.205	-414.205	-828.431	-414.205	-414.205	-414.206	-414.205	-828.432	-414.205	-414.205	-414.206	-414.206	-828.432	-414.205	-414.206	-414.206
17_Uracil-Uracil_BP_1.50_dimer.out	-828.425	-414.205	-414.206	-414.206	-414.206	-828.421	-414.204	-414.204	-414.204	-414.204	-828.423	-414.205	-414.205	-414.205	-414.205	-828.422	-414.204	-414.205	-414.205	-414.205	-828.418	-414.202	-414.202	-414.203	-414.203	-828.424	-414.205	-414.205	-414.206	-414.205	-828.422	-414.204	-414.204	-414.205	-414.204	-828.423	-414.205	-414.205	-414.205	-414.205	-828.424	-414.205	-414.205	-414.206	-414.205	-828.425	-414.205	-414.206	-414.206
17_Uracil-Uracil_BP_2.00_dimer.out	-828.416	-414.205	-414.206	-414.206	-414.205	-828.413	-414.204	-414.204	-414.204	-414.204	-828.415	-414.205	-414.205	-414.205	-414.205	-828.414	-414.204	-414.205	-414.205	-414.204	-828.41	-414.202	-414.202	-414.203	-414.202	-828.416	-414.205	-414.205	-414.206	-414.205	-828.414	-414.204	-414.204	-414.204	-414.204	-828.415	-414.205	-414.205	-414.205	-414.205	-828.416	-414.205	-414.205	-414.206	-414.205	-828.416	-414.205	-414.206	-414.206
18_Water-Pyridine_0.90_dimer.out	-324.199	-76.3414	-247.847	-247.848	-76.3421	-324.198	-76.3415	-247.846	-247.847	-76.3419	-324.199	-76.3414	-247.847	-247.847	-76.342	-324.199	-76.3415	-247.847	-247.847	-76.3421	-324.198	-76.3415	-247.846	-247.847	-76.3422	-324.199	-76.3415	-247.847	-247.848	-76.3422	-324.199	-76.3414	-247.847	-247.848	-76.342	-324.199	-76.3414	-247.847	-247.848	-76.3421	-324.2	-76.3414	-247.847	-247.848	-76.3421	-324.199	-76.3414	-247.847	-247.848
18_Water-Pyridine_0.95_dimer.out	-324.2	-76.3414	-247.847	-247.848	-76.3421	-324.199	-76.3415	-247.846	-247.847	-76.3418	-324.199	-76.3414	-247.847	-247.847	-76.3419	-324.199	-76.3415	-247.847	-247.847	-76.3421	-324.199	-76.3415	-247.846	-247.847	-76.3422	-324.2	-76.3415	-247.847	-247.848	-76.3421	-324.2	-76.3414	-247.847	-247.848	-76.342	-324.2	-76.3414	-247.847	-247.848	-76.342	-324.2	-76.3414	-247.847	-247.848	-76.342	-324.2	-76.3414	-247.847	-247.848
18_Water-Pyridine_1.00_dimer.out	-324.2	-76.3414	-247.847	-247.848	-76.342	-324.199	-76.3415	-247.846	-247.847	-76.3418	-324.199	-76.3414	-247.847	-247.847	-76.3419	-324.199	-76.3415	-247.847	-247.847	-76.342	-324.199	-76.3415	-247.846	-247.847	-76.3421	-324.2	-76.3415	-247.847	-247.847	-76.342	-324.2	-76.3414	-247.847	-247.848	-76.3418	-324.2	-76.3414	-247.847	-247.848	-76.3419	-324.2	-76.3414	-247.847	-247.848	-76.3419	-324.2	-76.3414	-247.847	-247.848
18_Water-Pyridine_1.05_dimer.out	-324.2	-76.3414	-247.847	-247.847	-76.3419	-324.199	-76.3415	-247.846	-247.847	-76.3417	-324.199	-76.3414	-247.847	-247.847	-76.3418	-324.199	-76.3415	-247.847	-247.847	-76.3419	-324.199	-76.3415	-247.846	-247.847	-76.342	-324.2	-76.3415	-247.847	-247.847	-76.342	-324.2	-76.3414	-247.847	-247.848	-76.3418	-324.2	-76.3414	-247.847	-247.848	-76.3418	-324.2	-76.3414	-247.847	-247.848	-76.3418	-324.2	-76.3414	-247.847	-247.848
18_Water-Pyridine_1.10_dimer.out	-324.199	-76.3414	-247.847	-247.847	-76.3419	-324.198	-76.3415	-247.846	-247.847	-76.3417	-324.198	-76.3414	-247.847	-247.847	-76.3418	-324.199	-76.3415	-247.847	-247.847	-76.3419	-324.198	-76.3415	-247.846	-247.847	-76.342	-324.199	-76.3415	-247.847	-247.847	-76.3419	-324.199	-76.3414	-247.847	-247.848	-76.3418	-324.199	-76.3414	-247.847	-247.848	-76.3418	-324.199	-76.3414	-247.847	-247.848	-76.3418	-324.199	-76.3414	-247.847	-247.847
18_Water-Pyridine_1.25_dimer.out	-324.197	-76.3414	-247.847	-247.847	-76.3417	-324.196	-76.3415	-247.846	-247.847	-76.3417	-324.196	-76.3414	-247.847	-247.847	-76.3417	-324.196	-76.3415	-247.847	-247.847	-76.3418	-324.196	-76.3415	-247.846	-247.846	-76.3418	-324.197	-76.3415	-247.847	-247.847	-76.3418	-324.197	-76.3414	-247.847	-247.847	-76.3416	-324.197	-76.3414	-247.847	-247.848	-76.3417	-324.197	-76.3414	-247.847	-247.847	-76.3417	-324.197	-76.3414	-247.847	-247.847
18_Water-Pyridine_1.50_dimer.out	-324.194	-76.3414	-247.847	-247.847	-76.3416	-324.193	-76.3415	-247.846	-247.846	-76.3416	-324.193	-76.3414	-247.847	-247.847	-76.3415	-324.193	-76.3415	-247.847	-247.847	-76.3416	-324.193	-76.3415	-247.846	-247.846	-76.3417	-324.194	-76.3415	-247.847	-247.847	-76.3416	-324.194	-76.3414	-247.847	-247.847	-76.3415	-324.194	-76.3414	-247.847	-247.847	-76.3415	-324.194	-76.3414	-247.847	-247.847	-76.3416	-324.194	-76.3414	-247.847	-247.847
18_Water-Pyridine_2.00_dimer.out	-324.191	-76.3414	-247.847	-247.847	-76.3415	-324.19	-76.3415	-247.846	-247.846	-76.3415	-324.19	-76.3414	-247.847	-247.847	-76.3414	-324.19	-76.3415	-247.847	-247.847	-76.3415	-324.19	-76.3415	-247.846	-247.846	-76.3416	-324.191	-76.3415	-247.847	-247.847	-76.3415	-324.191	-76.3414	-247.847	-247.847	-76.3414	-324.191	-76.3414	-247.847	-247.847	-76.3414	-324.191	-76.3414	-247.847	-247.847	-76.3415	-324.191	-76.3414	-247.847	-247.847
19_MeOH-Pyridine_0.90_dimer.out	-363.419	-115.561	-247.847	-247.848	-115.561	-363.418	-115.561	-247.846	-247.847	-115.561	-363.419	-115.561	-247.847	-247.847	-115.561	-363.419	-115.561	-247.847	-247.847	-115.561	-363.418	-115.561	-247.846	-247.847	-115.561	-363.419	-115.561	-247.847	-247.848	-115.562	-363.419	-115.561	-247.847	-247.848	-115.561	-363.42	-115.561	-247.847	-247.848	-115.561	-363.42	-115.561	-247.847	-247.848	-115.561	-363.42	-115.561	-247.847	-247.848
19_MeOH-Pyridine_0.95_dimer.out	-363.42	-115.561	-247.847	-247.848	-115.561	-363.419	-115.561	-247.846	-247.847	-115.561	-363.419	-115.561	-247.847	-247.847	-115.561	-363.42	-115.561	-247.847	-247.847	-115.561	-363.419	-115.561	-247.846	-247.847	-115.561	-363.42	-115.561	-247.847	-247.848	-115.561	-363.42	-115.561	-247.847	-247.848	-115.561	-363.42	-115.561	-247.847	-247.848	-115.561	-363.42	-115.561	-247.847	-247.848	-115.561	-363.42	-115.561	-247.847	-247.848
19_MeOH-Pyridine_1.00_dimer.out	-363.42	-115.561	-247.847	-247.848	-115.561	-363.419	-115.561	-247.846	-247.847	-115.561	-363.419	-115.561	-247.847	-247.847	-115.561	-363.42	-115.561	-247.847	-247.847	-115.561	-363.419	-115.561	-247.846	-247.847	-115.561	-363.42	-115.561	-247.847	-247.848	-115.561	-363.42	-115.561	-247.847	-247.848	-115.561	-363.42	-115.561	-247.847	-247.848	-115.561	-363.42	-115.561	-247.847	-247.848	-115.561	-363.42	-115.561	-247.847	-247.848
19_MeOH-Pyridine_1.05_dimer.out	-363.42	-115.561	-247.847	-247.848	-115.561	-363.419	-115.561	-247.846	-247.847	-115.561	-363.419	-115.561	-247.847	-247.847	-115.561	-363.419	-115.561	-247.847	-247.847	-115.561	-363.419	-115.561	-247.846	-247.847	-115.561	-363.42	-115.561	-247.847	-247.848	-115.561	-363.42	-115.561	-247.847	-247.848	-115.561	-363.42	-115.561	-247.847	-247.848	-115.561	-363.42	-115.561	-247.847	-247.848	-115.561	-363.42	-115.561	-247.847	-247.848
19_MeOH-Pyridine_1.10_dimer.out	-363.419	-115.561	-247.847	-247.848	-115.561	-363.418	-115.561	-247.846	-247.847	-115.561	-363.419	-115.561	-247.847	-247.847	-115.561	-363.419	-115.561	-247.847	-247.847	-115.561	-363.418	-115.561	-247.846	-247.847	-115.561	-363.419	-115.561	-247.847	-247.847	-115.561	-363.419	-115.561	-247.847	-247.848	-115.561	-363.419	-115.561	-247.847	-247.848	-115.561	-363.419	-115.561	-247.847	-247.848	-115.561	-363.419	-115.561	-247.847	-247.848
19_MeOH-Pyridine_1.25_dimer.out	-363.417	-115.561	-247.847	-247.847	-115.561	-363.416	-115.561	-247.846	-247.847	-115.561	-363.416	-115.561	-247.847	-247.847	-115.561	-363.417	-115.561	-247.847	-247.847	-115.561	-363.416	-115.561	-247.846	-247.847	-115.561	-363.417	-115.561	-247.847	-247.847	-115.561	-363.417	-115.561	-247.847	-247.847	-115.561	-363.417	-115.561	-247.847	-247.848	-115.561	-363.417	-115.561	-247.847	-247.848	-115.561	-363.417	-115.561	-247.847	-247.847
19_MeOH-Pyridine_1.50_dimer.out	-363.414	-115.561	-247.847	-247.847	-115.561	-363.413	-115.561	-247.846	-247.847	-115.561	-363.413	-115.561	-247.847	-247.847	-115.561	-363.413	-115.561	-247.847	-247.847	-115.561	-363.413	-115.561	-247.846	-247.846	-115.561	-363.414	-115.561	-247.847	-247.847	-115.561	-363.413	-115.561	-247.847	-247.847	-115.561	-363.414	-115.561	-247.847	-247.847	-115.561	-363.414	-115.561	-247.847	-247.847	-115.561	-363.414	-115.561	-247.847	-247.847
19_MeOH-Pyridine_2.00_dimer.out	-363.41	-115.561	-247.847	-247.847	-115.561	-363.409	-115.561	-247.846	-247.846	-115.561	-363.41	-115.561	-247.847	-247.847	-115.561	-363.41	-115.561	-247.847	-247.847	-115.561	-363.409	-115.561	-247.846	-247.846	-115.561	-363.41	-115.561	-247.847	-247.847	-115.561	-363.41	-115.561	-247.847	-247.847	-115.561	-363.41	-115.561	-247.847	-247.847	-115.561	-363.41	-115.561	-247.847	-247.847	-115.561	-363.41	-115.561	-247.847	-247.847
20_AcOH-AcOH_0.90_dimer.out	-457.565	-228.768	-228.768	-228.77	-228.77	-457.564	-228.768	-228.768	-228.769	-228.769	-457.565	-228.768	-228.768	-228.769	-228.769	-457.564	-228.768	-228.768	-228.769	-228.769	-457.563	-228.767	-228.767	-228.769	-228.769	-457.565	-228.768	-228.768	-228.77	-228.77	-457.564	-228.768	-228.768	-228.769	-228.769	-457.565	-228.768	-228.768	-228.769	-228.769	-457.565	-228.768	-228.768	-228.77	-228.77	-457.565	-228.768	-228.768	-228.77
20_AcOH-AcOH_0.95_dimer.out	-457.567	-228.768	-228.768	-228.769	-228.769	-457.566	-228.768	-228.768	-228.769	-228.769	-457.567	-228.768	-228.768	-228.769	-228.769	-457.567	-228.768	-228.768	-228.769	-228.769	-457.565	-228.767	-228.767	-228.769	-228.769	-457.567	-228.768	-228.768	-228.769	-228.769	-457.566	-228.768	-228.768	-228.769	-228.769	-457.567	-228.768	-228.768	-228.769	-228.769	-457.567	-228.768	-228.768	-228.769	-228.769	-457.567	-228.768	-228.768	-228.769
20_AcOH-AcOH_1.00_dimer.out	-457.568	-228.768	-228.768	-228.769	-228.769	-457.566	-228.768	-228.768	-228.769	-228.769	-457.567	-228.768	-228.768	-228.769	-228.769	-457.567	-228.768	-228.768	-228.769	-228.769	-457.565	-228.767	-228.767	-228.768	-228.768	-457.568	-228.768	-228.768	-228.769	-228.769	-457.566	-228.768	-228.768	-228.769	-228.769	-457.567	-228.768	-228.768	-228.769	-228.769	-457.568	-228.768	-228.768	-228.769	-228.769	-457.568	-228.768	-228.768	-228.769
20_AcOH-AcOH_1.05_dimer.out	-457.567	-228.768	-228.768	-228.769	-228.769	-457.566	-228.768	-228.768	-228.769	-228.769	-457.566	-228.768	-228.768	-228.769	-228.769	-457.566	-228.768	-228.768	-228.769	-228.769	-457.564	-228.767	-228.767	-228.768	-228.768	-457.567	-228.768	-228.768	-228.769	-228.769	-457.566	-228.768	-228.768	-228.769	-228.769	-457.566	-228.768	-228.768	-228.769	-228.769	-457.567	-228.768	-228.768	-228.769	-228.769	-457.567	-228.768	-228.768	-228.769
20_AcOH-AcOH_1.10_dimer.out	-457.566	-228.768	-228.768	-228.769	-228.769	-457.564	-228.768	-228.768	-228.769	-228.769	-457.565	-228.768	-228.768	-228.769	-228.769	-457.565	-228.768	-228.768	-228.769	-228.769	-457.563	-228.767	-228.767	-228.768	-228.768	-457.566	-228.768	-228.768	-228.769	-228.769	-457.564	-228.768	-228.768	-228.769	-228.769	-457.565	-228.768	-228.768	-228.769	-228.769	-457.566	-228.768	-228.768	-228.769	-228.769	-457.566	-228.768	-228.768	-228.769
20_AcOH-AcOH_1.25_dimer.out	-457.56	-228.768	-228.768	-228.769	-228.769	-457.559	-228.768	-228.768	-228.768	-228.768	-457.56	-228.768	-228.768	-228.769	-228.769	-457.559	-228.768	-228.768	-228.769	-228.769	-457.558	-228.767	-228.767	-228.768	-228.768	-457.56	-228.768	-228.768	-228.769	-228.769	-457.559	-228.768	-228.768	-228.768	-228.768	-457.56	-228.768	-228.768	-228.769	-228.769	-457.56	-228.768	-228.768	-228.769	-228.769	-457.56	-228.768	-228.768	-228.769
20_AcOH-AcOH_1.50_dimer.out	-457.552	-228.768	-228.768	-228.769	-228.769	-457.551	-228.768	-228.768	-228.768	-228.768	-457.551	-228.768	-228.768	-228.768	-228.768	-457.551	-228.768	-228.768	-228.768	-228.768	-457.549	-228.767	-228.767	-228.768	-228.768	-457.552	-228.768	-228.768	-228.769	-228.769	-457.55	-228.768	-228.768	-228.768	-228.768	-457.551	-228.768	-228.768	-228.768	-228.768	-457.551	-228.768	-228.768	-228.769	-228.769	-457.552	-228.768	-228.768	-228.769
20_AcOH-AcOH_2.00_dimer.out	-457.543	-228.768	-228.768	-228.768	-228.768	-457.542	-228.768	-228.768	-228.768	-228.768	-457.542	-228.768	-228.768	-228.768	-228.768	-457.542	-228.768	-228.768	-228.768	-228.768	-457.54	-228.767	-228.767	-228.767	-228.767	-457.543	-228.768	-228.768	-228.769	-228.769	-457.541	-228.768	-228.768	-228.768	-228.768	-457.542	-228.768	-228.768	-228.768	-228.768	-457.542	-228.768	-228.768	-228.768	-228.768	-457.543	-228.768	-228.768	-228.768
21_AcNH2-AcNH2_0.90_dimer.out	-417.836	-208.906	-208.906	-208.907	-208.907	-417.835	-208.906	-208.906	-208.906	-208.906	-417.836	-208.906	-208.906	-208.907	-208.907	-417.835	-208.906	-208.906	-208.907	-208.907	-417.834	-208.905	-208.905	-208.906	-208.906	-417.836	-208.906	-208.906	-208.907	-208.907	-417.835	-208.906	-208.906	-208.906	-208.906	-417.836	-208.906	-208.906	-208.907	-208.907	-417.836	-208.906	-208.906	-208.907	-208.907	-417.836	-208.906	-208.906	-208.907
21_AcNH2-AcNH2_0.95_dimer.out	-417.838	-208.906	-208.906	-208.907	-208.907	-417.836	-208.906	-208.906	-208.906	-208.906	-417.837	-208.906	-208.906	-208.907	-208.907	-417.837	-208.906	-208.906	-208.907	-208.907	-417.836	-208.905	-208.905	-208.906	-208.906	-417.838	-208.906	-208.906	-208.907	-208.907	-417.837	-208.906	-208.906	-208.906	-208.906	-417.837	-208.906	-208.906	-208.907	-208.907	-417.838	-208.906	-208.906	-208.907	-208.907	-417.838	-208.906	-208.906	-208.907
21_AcNH2-AcNH2_1.00_dimer.out	-417.838	-208.906	-208.906	-208.907	-208.907	-417.837	-208.906	-208.906	-208.906	-208.906	-417.838	-208.906	-208.906	-208.906	-208.906	-417.837	-208.906	-208.906	-208.906	-208.906	-417.836	-208.905	-208.905	-208.906	-208.906	-417.838	-208.906	-208.906	-208.907	-208.907	-417.837	-208.906	-208.906	-208.906	-208.906	-417.838	-208.906	-208.906	-208.906	-208.906	-417.838	-208.906	-208.906	-208.907	-208.907	-417.838	-208.906	-208.906	-208.907
21_AcNH2-AcNH2_1.05_dimer.out	-417.838	-208.906	-208.906	-208.907	-208.907	-417.836	-208.906	-208.906	-208.906	-208.906	-417.837	-208.906	-208.906	-208.906	-208.906	-417.837	-208.906	-208.906	-208.906	-208.906	-417.835	-208.905	-208.905	-208.906	-208.906	-417.838	-208.906	-208.906	-208.907	-208.907	-417.836	-208.906	-208.906	-208.906	-208.906	-417.837	-208.906	-208.906	-208.906	-208.906	-417.838	-208.906	-208.906	-208.906	-208.906	-417.838	-208.906	-208.906	-208.906
21_AcNH2-AcNH2_1.10_dimer.out	-417.837	-208.906	-208.906	-208.906	-208.906	-417.835	-208.906	-208.906	-208.906	-208.906	-417.836	-208.906	-208.906	-208.906	-208.906	-417.836	-208.906	-208.906	-208.906	-208.906	-417.834	-208.905	-208.905	-208.906	-208.906	-417.836	-208.906	-208.906	-208.906	-208.906	-417.835	-208.906	-208.906	-208.906	-208.906	-417.836	-208.906	-208.906	-208.906	-208.906	-417.836	-208.906	-208.906	-208.906	-208.906	-417.837	-208.906	-208.906	-208.906
21_AcNH2-AcNH2_1.25_dimer.out	-417.832	-208.906	-208.906	-208.906	-208.906	-417.831	-208.906	-208.906	-208.906	-208.906	-417.831	-208.906	-208.906	-208.906	-208.906	-417.831	-208.906	-208.906	-208.906	-208.906	-417.83	-208.905	-208.905	-208.905	-208.905	-417.832	-208.906	-208.906	-208.906	-208.906	-417.831	-208.906	-208.906	-208.906	-208.906	-417.831	-208.906	-208.906	-208.906	-208.906	-417.832	-208.906	-208.906	-208.906	-208.906	-417.832	-208.906	-208.906	-208.906
21_AcNH2-AcNH2_1.50_dimer.out	-417.825	-208.906	-208.906	-208.906	-208.906	-417.824	-208.906	-208.906	-208.906	-208.906	-417.824	-208.906	-208.906	-208.906	-208.906	-417.824	-208.906	-208.906	-208.906	-208.906	-417.823	-208.905	-208.905	-208.905	-208.905	-417.825	-208.906	-208.906	-208.906	-208.906	-417.824	-208.906	-208.906	-208.906	-208.906	-417.824	-208.906	-208.906	-208.906	-208.906	-417.825	-208.906	-208.906	-208.906	-208.906	-417.825	-208.906	-208.906	-208.906
21_AcNH2-AcNH2_2.00_dimer.out	-417.817	-208.906	-208.906	-208.906	-208.906	-417.816	-208.906	-208.906	-208.906	-208.906	-417.816	-208.906	-208.906	-208.906	-208.906	-417.816	-208.906	-208.906	-208.906	-208.906	-417.815	-208.905	-208.905	-208.905	-208.905	-417.817	-208.906	-208.906	-208.906	-208.906	-417.816	-208.906	-208.906	-208.906	-208.906	-417.816	-208.906	-208.906	-208.906	-208.906	-417.817	-208.906	-208.906	-208.906	-208.906	-417.817	-208.906	-208.906	-208.906
22_AcOH-Uracil_0.90_dimer.out	-643.003	-228.768	-414.205	-414.207	-228.77	-643	-228.768	-414.204	-414.205	-228.769	-643.002	-228.768	-414.205	-414.206	-228.769	-643.001	-228.768	-414.204	-414.206	-228.769	-642.998	-228.767	-414.202	-414.203	-228.769	-643.003	-228.768	-414.205	-414.206	-228.77	-643.001	-228.768	-414.204	-414.205	-228.769	-643.002	-228.768	-414.205	-414.206	-228.769	-643.003	-228.768	-414.205	-414.206	-228.769	-643.003	-228.768	-414.205	-414.206
22_AcOH-Uracil_0.95_dimer.out	-643.005	-228.768	-414.205	-414.206	-228.769	-643.002	-228.768	-414.204	-414.205	-228.769	-643.004	-228.768	-414.205	-414.206	-228.769	-643.003	-228.768	-414.204	-414.205	-228.769	-643	-228.767	-414.202	-414.203	-228.768	-643.005	-228.768	-414.205	-414.206	-228.769	-643.003	-228.768	-414.204	-414.205	-228.769	-643.004	-228.768	-414.205	-414.206	-228.769	-643.005	-228.768	-414.205	-414.206	-228.769	-643.005	-228.768	-414.205	-414.206
22_AcOH-Uracil_1.00_dimer.out	-643.005	-228.768	-414.205	-414.206	-228.769	-643.002	-228.768	-414.204	-414.204	-228.769	-643.004	-228.768	-414.205	-414.205	-228.769	-643.004	-228.768	-414.204	-414.205	-228.769	-643	-228.767	-414.202	-414.203	-228.768	-643.005	-228.768	-414.205	-414.206	-228.769	-643.003	-228.768	-414.204	-414.205	-228.769	-643.004	-228.768	-414.205	-414.206	-228.769	-643.005	-228.768	-414.205	-414.206	-228.769	-643.005	-228.768	-414.205	-414.206
22_AcOH-Uracil_1.05_dimer.out	-643.005	-228.768	-414.205	-414.206	-228.769	-643.002	-228.768	-414.204	-414.204	-228.769	-643.004	-228.768	-414.205	-414.205	-228.769	-643.003	-228.768	-414.204	-414.205	-228.769	-643	-228.767	-414.202	-414.203	-228.768	-643.004	-228.768	-414.205	-414.206	-228.769	-643.003	-228.768	-414.204	-414.205	-228.769	-643.004	-228.768	-414.205	-414.206	-228.769	-643.005	-228.768	-414.205	-414.206	-228.769	-643.005	-228.768	-414.205	-414.206
22_AcOH-Uracil_1.10_dimer.out	-643.004	-228.768	-414.205	-414.206	-228.769	-643.001	-228.768	-414.204	-414.204	-228.768	-643.002	-228.768	-414.205	-414.205	-228.769	-643.002	-228.768	-414.204	-414.205	-228.769	-642.999	-228.767	-414.202	-414.203	-228.768	-643.003	-228.768	-414.205	-414.206	-228.769	-643.001	-228.768	-414.204	-414.205	-228.769	-643.003	-228.768	-414.205	-414.205	-228.769	-643.003	-228.768	-414.205	-414.206	-228.769	-643.003	-228.768	-414.205	-414.206
22_AcOH-Uracil_1.25_dimer.out	-642.998	-228.768	-414.205	-414.206	-228.769	-642.996	-228.768	-414.204	-414.204	-228.768	-642.997	-228.768	-414.205	-414.205	-228.768	-642.997	-228.768	-414.204	-414.205	-228.769	-642.993	-228.767	-414.202	-414.203	-228.768	-642.998	-228.768	-414.205	-414.206	-228.769	-642.996	-228.768	-414.204	-414.205	-228.768	-642.997	-228.768	-414.205	-414.205	-228.769	-642.998	-228.768	-414.205	-414.206	-228.769	-642.998	-228.768	-414.205	-414.206
22_AcOH-Uracil_1.50_dimer.out	-642.99	-228.768	-414.205	-414.206	-228.769	-642.987	-228.768	-414.204	-414.204	-228.768	-642.988	-228.768	-414.205	-414.205	-228.768	-642.988	-228.768	-414.204	-414.205	-228.768	-642.985	-228.767	-414.202	-414.202	-228.768	-642.989	-228.768	-414.205	-414.205	-228.769	-642.988	-228.768	-414.204	-414.204	-228.768	-642.989	-228.768	-414.205	-414.205	-228.768	-642.989	-228.768	-414.205	-414.205	-228.768	-642.99	-228.768	-414.205	-414.205
22_AcOH-Uracil_2.00_dimer.out	-642.98	-228.768	-414.205	-414.205	-228.768	-642.978	-228.768	-414.204	-414.204	-228.768	-642.979	-228.768	-414.205	-414.205	-228.768	-642.979	-228.768	-414.204	-414.204	-228.768	-642.976	-228.767	-414.202	-414.202	-228.767	-642.98	-228.768	-414.205	-414.205	-228.768	-642.979	-228.768	-414.204	-414.204	-228.768	-642.979	-228.768	-414.205	-414.205	-228.768	-642.98	-228.768	-414.205	-414.205	-228.768	-642.98	-228.768	-414.205	-414.205
23_AcNH2-Uracil_0.90_dimer.out	-623.14	-208.906	-414.205	-414.206	-208.907	-623.137	-208.906	-414.204	-414.204	-208.906	-623.139	-208.906	-414.204	-414.205	-208.907	-623.138	-208.906	-414.204	-414.205	-208.907	-623.135	-208.905	-414.202	-414.203	-208.906	-623.14	-208.906	-414.205	-414.206	-208.907	-623.138	-208.905	-414.204	-414.205	-208.907	-623.139	-208.906	-414.205	-414.206	-208.907	-623.14	-208.906	-414.205	-414.206	-208.907	-623.14	-208.906	-414.205	-414.206
23_AcNH2-Uracil_0.95_dimer.out	-623.142	-208.906	-414.205	-414.206	-208.907	-623.139	-208.906	-414.204	-414.204	-208.906	-623.141	-208.906	-414.204	-414.205	-208.907	-623.14	-208.906	-414.204	-414.205	-208.907	-623.137	-208.905	-414.202	-414.203	-208.906	-623.142	-208.906	-414.205	-414.206	-208.907	-623.14	-208.905	-414.204	-414.205	-208.906	-623.141	-208.906	-414.205	-414.206	-208.907	-623.142	-208.906	-414.205	-414.206	-208.907	-623.142	-208.906	-414.205	-414.206
23_AcNH2-Uracil_1.00_dimer.out	-623.142	-208.906	-414.205	-414.206	-208.907	-623.139	-208.906	-414.204	-414.204	-208.906	-623.141	-208.906	-414.204	-414.205	-208.906	-623.141	-208.906	-414.204	-414.205	-208.907	-623.137	-208.905	-414.202	-414.203	-208.906	-623.142	-208.906	-414.205	-414.206	-208.907	-623.14	-208.905	-414.204	-414.205	-208.906	-623.141	-208.906	-414.205	-414.205	-208.907	-623.142	-208.906	-414.205	-414.206	-208.907	-623.142	-208.906	-414.205	-414.206
23_AcNH2-Uracil_1.05_dimer.out	-623.142	-208.906	-414.205	-414.206	-208.907	-623.139	-208.906	-414.204	-414.204	-208.906	-623.141	-208.906	-414.204	-414.205	-208.906	-623.14	-208.906	-414.204	-414.205	-208.906	-623.137	-208.905	-414.202	-414.203	-208.906	-623.141	-208.906	-414.205	-414.206	-208.907	-623.14	-208.905	-414.204	-414.205	-208.906	-623.141	-208.906	-414.205	-414.205	-208.906	-623.142	-208.906	-414.205	-414.206	-208.907	-623.142	-208.906	-414.205	-414.206
23_AcNH2-Uracil_1.10_dimer.out	-623.141	-208.906	-414.205	-414.206	-208.907	-623.138	-208.906	-414.204	-414.204	-208.906	-623.139	-208.906	-414.204	-414.205	-208.906	-623.139	-208.906	-414.204	-414.205	-208.906	-623.136	-208.905	-414.202	-414.203	-208.906	-623.14	-208.906	-414.205	-414.206	-208.907	-623.139	-208.905	-414.204	-414.205	-208.906	-623.14	-208.906	-414.205	-414.205	-208.906	-623.14	-208.906	-414.205	-414.206	-208.906	-623.141	-208.906	-414.205	-414.206
23_AcNH2-Uracil_1.25_dimer.out	-623.136	-208.906	-414.205	-414.206	-208.906	-623.133	-208.906	-414.204	-414.204	-208.906	-623.134	-208.906	-414.204	-414.205	-208.906	-623.134	-208.906	-414.204	-414.205	-208.906	-623.131	-208.905	-414.202	-414.203	-208.905	-623.135	-208.906	-414.205	-414.205	-208.906	-623.134	-208.905	-414.204	-414.204	-208.906	-623.135	-208.906	-414.205	-414.205	-208.906	-623.135	-208.906	-414.205	-414.205	-208.906	-623.136	-208.906	-414.205	-414.206
23_AcNH2-Uracil_1.50_dimer.out	-623.128	-208.906	-414.205	-414.205	-208.906	-623.125	-208.906	-414.204	-414.204	-208.906	-623.126	-208.906	-414.204	-414.205	-208.906	-623.126	-208.906	-414.204	-414.204	-208.906	-623.123	-208.905	-414.202	-414.202	-208.905	-623.127	-208.906	-414.205	-414.205	-208.906	-623.126	-208.905	-414.204	-414.204	-208.906	-623.127	-208.906	-414.205	-414.205	-208.906	-623.127	-208.906	-414.205	-414.205	-208.906	-623.127	-208.906	-414.205	-414.205
23_AcNH2-Uracil_2.00_dimer.out	-623.119	-208.906	-414.205	-414.205	-208.906	-623.117	-208.906	-414.204	-414.204	-208.906	-623.118	-208.906	-414.204	-414.205	-208.906	-623.117	-208.906	-414.204	-414.204	-208.906	-623.114	-208.905	-414.202	-414.202	-208.905	-623.118	-208.906	-414.205	-414.205	-208.906	-623.117	-208.905	-414.204	-414.204	-208.905	-623.118	-208.906	-414.205	-414.205	-208.906	-623.118	-208.906	-414.205	-414.205	-208.906	-623.118	-208.906	-414.205	-414.205
24_Benzene-Benzene_pi-pi_0.90_dimer.out	-463.639	-231.819	-231.819	-231.82	-231.82	-463.636	-231.818	-231.818	-231.819	-231.819	-463.638	-231.818	-231.818	-231.819	-231.819	-463.638	-231.818	-231.818	-231.82	-231.82	-463.638	-231.818	-231.818	-231.82	-231.82	-463.639	-231.819	-231.819	-231.82	-231.82	-463.64	-231.819	-231.819	-231.82	-231.82	-463.64	-231.819	-231.819	-231.82	-231.82	-463.64	-231.819	-231.819	-231.82	-231.82	-463.64	-231.819	-231.819	-231.82
24_Benzene-Benzene_pi-pi_0.95_dimer.out	-463.642	-231.819	-231.819	-231.82	-231.82	-463.639	-231.818	-231.818	-231.818	-231.818	-463.641	-231.818	-231.818	-231.819	-231.819	-463.641	-231.818	-231.818	-231.819	-231.819	-463.641	-231.818	-231.818	-231.819	-231.819	-463.642	-231.819	-231.819	-231.82	-231.82	-463.643	-231.819	-231.819	-231.82	-231.82	-463.643	-231.819	-231.819	-231.82	-231.82	-463.642	-231.819	-231.819	-231.82	-231.82	-463.642	-231.819	-231.819	-231.82
24_Benzene-Benzene_pi-pi_1.00_dimer.out	-463.643	-231.819	-231.819	-231.82	-231.82	-463.64	-231.818	-231.818	-231.818	-231.818	-463.641	-231.818	-231.818	-231.819	-231.819	-463.642	-231.818	-231.818	-231.819	-231.819	-463.642	-231.818	-231.818	-231.819	-231.819	-463.643	-231.819	-231.819	-231.82	-231.82	-463.644	-231.819	-231.819	-231.82	-231.82	-463.644	-231.819	-231.819	-231.82	-231.82	-463.643	-231.819	-231.819	-231.82	-231.82	-463.643	-231.819	-231.819	-231.82
24_Benzene-Benzene_pi-pi_1.05_dimer.out	-463.643	-231.819	-231.819	-231.819	-231.819	-463.64	-231.818	-231.818	-231.818	-231.818	-463.641	-231.818	-231.818	-231.819	-231.819	-463.642	-231.818	-231.818	-231.819	-231.819	-463.642	-231.818	-231.818	-231.819	-231.819	-463.643	-231.819	-231.819	-231.819	-231.819	-463.644	-231.819	-231.819	-231.82	-231.82	-463.644	-231.819	-231.819	-231.82	-231.82	-463.643	-231.819	-231.819	-231.82	-231.82	-463.643	-231.819	-231.819	-231.82
24_Benzene-Benzene_pi-pi_1.10_dimer.out	-463.642	-231.819	-231.819	-231.819	-231.819	-463.64	-231.818	-231.818	-231.818	-231.818	-463.641	-231.818	-231.818	-231.819	-231.819	-463.642	-231.818	-231.818	-231.819	-231.819	-463.641	-231.818	-231.818	-231.819	-231.819	-463.642	-231.819	-231.819	-231.819	-231.819	-463.644	-231.819	-231.819	-231.819	-231.819	-463.643	-231.819	-231.819	-231.819	-231.819	-463.643	-231.819	-231.819	-231.819	-231.819	-463.643	-231.819	-231.819	-231.819
24_Benzene-Benzene_pi-pi_1.25_dimer.out	-463.64	-231.819	-231.819	-231.819	-231.819	-463.638	-231.818	-231.818	-231.818	-231.818	-463.639	-231.818	-231.818	-231.818	-231.818	-463.64	-231.818	-231.818	-231.819	-231.819	-463.64	-231.818	-231.818	-231.819	-231.819	-463.64	-231.819	-231.819	-231.819	-231.819	-463.641	-231.819	-231.819	-231.819	-231.819	-463.641	-231.819	-231.819	-231.819	-231.819	-463.641	-231.819	-231.819	-231.819	-231.819	-463.641	-231.819	-231.819	-231.819
24_Benzene-Benzene_pi-pi_1.50_dimer.out	-463.638	-231.819	-231.819	-231.819	-231.819	-463.637	-231.818	-231.818	-231.818	-231.818	-463.637	-231.818	-231.818	-231.818	-231.818	-463.638	-231.818	-231.818	-231.818	-231.818	-463.638	-231.818	-231.818	-231.818	-231.818	-463.638	-231.819	-231.819	-231.819	-231.819	-463.639	-231.819	-231.819	-231.819	-231.819	-463.639	-231.819	-231.819	-231.819	-231.819	-463.639	-231.819	-231.819	-231.819	-231.819	-463.638	-231.819	-231.819	-231.819
24_Benzene-Benzene_pi-pi_2.00_dimer.out	-463.637	-231.819	-231.819	-231.819	-231.819	-463.636	-231.818	-231.818	-231.818	-231.818	-463.636	-231.818	-231.818	-231.818	-231.818	-463.637	-231.818	-231.818	-231.818	-231.818	-463.637	-231.818	-231.818	-231.818	-231.818	-463.637	-231.819	-231.819	-231.819	-231.819	-463.638	-231.819	-231.819	-231.819	-231.819	-463.638	-231.819	-231.819	-231.819	-231.819	-463.638	-231.819	-231.819	-231.819	-231.819	-463.638	-231.819	-231.819	-231.819
25_Pyridine-Pyridine_pi-pi_0.90_dimer.out	-495.698	-247.847	-247.847	-247.849	-247.849	-495.694	-247.847	-247.847	-247.847	-247.847	-495.697	-247.847	-247.847	-247.848	-247.848	-495.697	-247.847	-247.847	-247.848	-247.848	-495.696	-247.846	-247.846	-247.848	-247.848	-495.698	-247.847	-247.847	-247.849	-247.849	-495.699	-247.847	-247.847	-247.849	-247.849	-495.699	-247.847	-247.847	-247.849	-247.849	-495.699	-247.847	-247.847	-247.849	-247.849	-495.698	-247.847	-247.847	-247.849
25_Pyridine-Pyridine_pi-pi_0.95_dimer.out	-495.701	-247.847	-247.847	-247.848	-247.848	-495.698	-247.847	-247.847	-247.847	-247.847	-495.699	-247.847	-247.847	-247.848	-247.848	-495.7	-247.847	-247.847	-247.848	-247.848	-495.699	-247.846	-247.846	-247.848	-247.848	-495.701	-247.847	-247.847	-247.848	-247.848	-495.702	-247.847	-247.847	-247.849	-247.849	-495.702	-247.847	-247.847	-247.849	-247.849	-495.701	-247.847	-247.847	-247.849	-247.849	-495.701	-247.847	-247.847	-247.849
25_Pyridine-Pyridine_pi-pi_1.00_dimer.out	-495.702	-247.847	-247.847	-247.848	-247.848	-495.699	-247.847	-247.847	-247.847	-247.847	-495.7	-247.847	-247.847	-247.848	-247.848	-495.701	-247.847	-247.847	-247.848	-247.848	-495.7	-247.846	-247.846	-247.847	-247.847	-495.702	-247.847	-247.847	-247.848	-247.848	-495.703	-247.847	-247.847	-247.848	-247.848	-495.703	-247.847	-247.847	-247.848	-247.848	-495.702	-247.847	-247.847	-247.848	-247.848	-495.702	-247.847	-247.847	-247.848
25_Pyridine-Pyridine_pi-pi_1.05_dimer.out	-495.702	-247.847	-247.847	-247.848	-247.848	-495.699	-247.847	-247.847	-247.847	-247.847	-495.7	-247.847	-247.847	-247.847	-247.847	-495.701	-247.847	-247.847	-247.848	-247.848	-495.7	-247.846	-247.846	-247.847	-247.847	-495.702	-247.847	-247.847	-247.848	-247.848	-495.703	-247.847	-247.847	-247.848	-247.848	-495.702	-247.847	-247.847	-247.848	-247.848	-495.702	-247.847	-247.847	-247.848	-247.848	-495.702	-247.847	-247.847	-247.848
25_Pyridine-Pyridine_pi-pi_1.10_dimer.out	-495.701	-247.847	-247.847	-247.848	-247.848	-495.699	-247.847	-247.847	-247.847	-247.847	-495.7	-247.847	-247.847	-247.847	-247.847	-495.7	-247.847	-247.847	-247.848	-247.848	-495.699	-247.846	-247.846	-247.847	-247.847	-495.701	-247.847	-247.847	-247.848	-247.848	-495.702	-247.847	-247.847	-247.848	-247.848	-495.702	-247.847	-247.847	-247.848	-247.848	-495.702	-247.847	-247.847	-247.848	-247.848	-495.701	-247.847	-247.847	-247.848
25_Pyridine-Pyridine_pi-pi_1.25_dimer.out	-495.699	-247.847	-247.847	-247.848	-247.848	-495.697	-247.847	-247.847	-247.847	-247.847	-495.697	-247.847	-247.847	-247.847	-247.847	-495.698	-247.847	-247.847	-247.847	-247.847	-495.697	-247.846	-247.846	-247.847	-247.847	-495.699	-247.847	-247.847	-247.848	-247.848	-495.7	-247.847	-247.847	-247.848	-247.848	-495.7	-247.847	-247.847	-247.848	-247.848	-495.699	-247.847	-247.847	-247.848	-247.848	-495.699	-247.847	-247.847	-247.848
25_Pyridine-Pyridine_pi-pi_1.50_dimer.out	-495.696	-247.847	-247.847	-247.847	-247.847	-495.695	-247.847	-247.847	-247.847	-247.847	-495.695	-247.847	-247.847	-247.847	-247.847	-495.696	-247.847	-247.847	-247.847	-247.847	-495.695	-247.846	-247.846	-247.847	-247.847	-495.696	-247.847	-247.847	-247.847	-247.847	-495.697	-247.847	-247.847	-247.847	-247.847	-495.697	-247.847	-247.847	-247.848	-247.848	-495.697	-247.847	-247.847	-247.848	-247.848	-495.697	-247.847	-247.847	-247.847
25_Pyridine-Pyridine_pi-pi_2.00_dimer.out	-495.695	-247.847	-247.847	-247.847	-247.847	-495.693	-247.847	-247.847	-247.847	-247.847	-495.694	-247.847	-247.847	-247.847	-247.847	-495.694	-247.847	-247.847	-247.847	-247.847	-495.693	-247.846	-247.846	-247.846	-247.846	-495.695	-247.847	-247.847	-247.847	-247.847	-495.695	-247.847	-247.847	-247.847	-247.847	-495.695	-247.847	-247.847	-247.847	-247.847	-495.695	-247.847	-247.847	-247.847	-247.847	-495.695	-247.847	-247.847	-247.847
26_Uracil-Uracil_pi-pi_0.90_dimer.out	-828.428	-414.206	-414.206	-414.208	-414.208	-828.421	-414.204	-414.204	-414.205	-414.205	-828.425	-414.205	-414.205	-414.207	-414.207	-828.424	-414.205	-414.205	-414.207	-414.207	-828.419	-414.203	-414.203	-414.205	-414.205	-828.426	-414.206	-414.206	-414.208	-414.208	-828.426	-414.205	-414.205	-414.207	-414.207	-828.426	-414.205	-414.205	-414.208	-414.208	-828.427	-414.206	-414.206	-414.208	-414.208	-828.427	-414.206	-414.206	-414.208
26_Uracil-Uracil_pi-pi_0.95_dimer.out	-828.43	-414.206	-414.206	-414.208	-414.208	-828.424	-414.204	-414.204	-414.205	-414.205	-828.428	-414.205	-414.205	-414.207	-414.207	-828.427	-414.205	-414.205	-414.207	-414.207	-828.422	-414.203	-414.203	-414.205	-414.205	-828.429	-414.206	-414.206	-414.208	-414.208	-828.428	-414.205	-414.205	-414.207	-414.207	-828.429	-414.205	-414.205	-414.207	-414.207	-828.43	-414.206	-414.206	-414.208	-414.208	-828.43	-414.206	-414.206	-414.208
26_Uracil-Uracil_pi-pi_1.00_dimer.out	-828.43	-414.206	-414.206	-414.208	-414.208	-828.424	-414.204	-414.204	-414.205	-414.205	-828.428	-414.205	-414.205	-414.207	-414.207	-828.427	-414.205	-414.205	-414.207	-414.207	-828.422	-414.203	-414.203	-414.205	-414.205	-828.429	-414.206	-414.206	-414.207	-414.207	-828.429	-414.205	-414.205	-414.207	-414.207	-828.429	-414.205	-414.205	-414.207	-414.207	-828.43	-414.206	-414.206	-414.207	-414.207	-828.43	-414.206	-414.206	-414.208
26_Uracil-Uracil_pi-pi_1.05_dimer.out	-828.429	-414.206	-414.206	-414.207	-414.207	-828.424	-414.204	-414.204	-414.205	-414.205	-828.427	-414.205	-414.205	-414.206	-414.206	-828.427	-414.205	-414.205	-414.206	-414.206	-828.422	-414.203	-414.203	-414.204	-414.204	-828.428	-414.206	-414.206	-414.207	-414.207	-828.428	-414.205	-414.205	-414.206	-414.206	-828.428	-414.205	-414.205	-414.207	-414.207	-828.429	-414.206	-414.206	-414.207	-414.207	-828.429	-414.206	-414.206	-414.207
26_Uracil-Uracil_pi-pi_1.10_dimer.out	-828.428	-414.206	-414.206	-414.207	-414.207	-828.423	-414.204	-414.204	-414.205	-414.205	-828.425	-414.205	-414.205	-414.206	-414.206	-828.425	-414.205	-414.205	-414.206	-414.206	-828.421	-414.203	-414.203	-414.204	-414.204	-828.427	-414.206	-414.206	-414.207	-414.207	-828.426	-414.205	-414.205	-414.206	-414.206	-828.427	-414.205	-414.205	-414.207	-414.207	-828.427	-414.206	-414.206	-414.207	-414.207	-828.428	-414.206	-414.206	-414.207
26_Uracil-Uracil_pi-pi_1.25_dimer.out	-828.423	-414.206	-414.206	-414.207	-414.207	-828.419	-414.204	-414.204	-414.205	-414.205	-828.421	-414.205	-414.205	-414.206	-414.206	-828.421	-414.205	-414.205	-414.206	-414.206	-828.417	-414.203	-414.203	-414.204	-414.204	-828.422	-414.206	-414.206	-414.207	-414.207	-828.421	-414.205	-414.205	-414.206	-414.206	-828.422	-414.205	-414.205	-414.206	-414.206	-828.423	-414.206	-414.206	-414.207	-414.207	-828.423	-414.206	-414.206	-414.207
26_Uracil-Uracil_pi-pi_1.50_dimer.out	-828.417	-414.206	-414.206	-414.206	-414.206	-828.414	-414.204	-414.204	-414.205	-414.205	-828.416	-414.205	-414.205	-414.205	-414.205	-828.416	-414.205	-414.205	-414.205	-414.205	-828.411	-414.203	-414.203	-414.203	-414.203	-828.417	-414.206	-414.206	-414.206	-414.206	-828.415	-414.205	-414.205	-414.205	-414.205	-828.417	-414.205	-414.205	-414.206	-414.206	-828.417	-414.206	-414.206	-414.206	-414.206	-828.417	-414.206	-414.206	-414.206
26_Uracil-Uracil_pi-pi_2.00_dimer.out	-828.414	-414.206	-414.206	-414.206	-414.206	-828.41	-414.204	-414.204	-414.204	-414.204	-828.412	-414.205	-414.205	-414.205	-414.205	-828.412	-414.205	-414.205	-414.205	-414.205	-828.407	-414.203	-414.203	-414.203	-414.203	-828.413	-414.206	-414.206	-414.206	-414.206	-828.411	-414.205	-414.205	-414.205	-414.205	-828.412	-414.205	-414.205	-414.205	-414.205	-828.413	-414.206	-414.206	-414.206	-414.206	-828.413	-414.206	-414.206	-414.206
27_Benzene-Pyridine_pi-pi_0.90_dimer.out	-479.669	-231.819	-247.847	-247.849	-231.82	-479.665	-231.818	-247.847	-247.847	-231.819	-479.667	-231.818	-247.847	-247.848	-231.819	-479.667	-231.818	-247.847	-247.848	-231.82	-479.666	-231.818	-247.846	-247.848	-231.82	-479.668	-231.819	-247.847	-247.849	-231.82	-479.67	-231.819	-247.847	-247.849	-231.82	-479.669	-231.819	-247.847	-247.849	-231.82	-479.669	-231.819	-247.847	-247.849	-231.82	-479.669	-231.819	-247.847	-247.849
27_Benzene-Pyridine_pi-pi_0.95_dimer.out	-479.672	-231.819	-247.847	-247.848	-231.82	-479.668	-231.818	-247.847	-247.847	-231.818	-479.67	-231.818	-247.847	-247.848	-231.819	-479.671	-231.818	-247.847	-247.848	-231.819	-479.67	-231.818	-247.846	-247.848	-231.819	-479.671	-231.819	-247.847	-247.848	-231.82	-479.673	-231.819	-247.847	-247.849	-231.82	-479.672	-231.819	-247.847	-247.849	-231.82	-479.672	-231.819	-247.847	-247.849	-231.82	-479.672	-231.819	-247.847	-247.849
27_Benzene-Pyridine_pi-pi_1.00_dimer.out	-479.673	-231.819	-247.847	-247.848	-231.82	-479.67	-231.818	-247.847	-247.847	-231.818	-479.671	-231.818	-247.847	-247.848	-231.819	-479.672	-231.818	-247.847	-247.848	-231.819	-479.671	-231.818	-247.846	-247.847	-231.819	-479.672	-231.819	-247.847	-247.848	-231.82	-479.674	-231.819	-247.847	-247.848	-231.82	-479.673	-231.819	-247.847	-247.848	-231.82	-479.673	-231.819	-247.847	-247.848	-231.82	-479.673	-231.819	-247.847	-247.848
27_Benzene-Pyridine_pi-pi_1.05_dimer.out	-479.673	-231.819	-247.847	-247.848	-231.82	-479.67	-231.818	-247.847	-247.847	-231.818	-479.671	-231.818	-247.847	-247.847	-231.819	-479.672	-231.818	-247.847	-247.848	-231.819	-479.671	-231.818	-247.846	-247.847	-231.819	-479.672	-231.819	-247.847	-247.848	-231.819	-479.674	-231.819	-247.847	-247.848	-231.82	-479.673	-231.819	-247.847	-247.848	-231.82	-479.673	-231.819	-247.847	-247.848	-231.82	-479.673	-231.819	-247.847	-247.848
27_Benzene-Pyridine_pi-pi_1.10_dimer.out	-479.672	-231.819	-247.847	-247.848	-231.819	-479.67	-231.818	-247.847	-247.847	-231.818	-479.67	-231.818	-247.847	-247.847	-231.819	-479.671	-231.818	-247.847	-247.847	-231.819	-479.67	-231.818	-247.846	-247.847	-231.819	-479.672	-231.819	-247.847	-247.848	-231.819	-479.673	-231.819	-247.847	-247.848	-231.82	-479.673	-231.819	-247.847	-247.848	-231.82	-479.672	-231.819	-247.847	-247.848	-231.819	-479.672	-231.819	-247.847	-247.848
27_Benzene-Pyridine_pi-pi_1.25_dimer.out	-479.67	-231.819	-247.847	-247.848	-231.819	-479.668	-231.818	-247.847	-247.847	-231.818	-479.668	-231.818	-247.847	-247.847	-231.818	-479.669	-231.818	-247.847	-247.847	-231.819	-479.668	-231.818	-247.846	-247.847	-231.819	-479.67	-231.819	-247.847	-247.848	-231.819	-479.671	-231.819	-247.847	-247.848	-231.819	-479.67	-231.819	-247.847	-247.848	-231.819	-479.67	-231.819	-247.847	-247.848	-231.819	-479.67	-231.819	-247.847	-247.848
27_Benzene-Pyridine_pi-pi_1.50_dimer.out	-479.667	-231.819	-247.847	-247.847	-231.819	-479.666	-231.818	-247.847	-247.847	-231.818	-479.666	-231.818	-247.847	-247.847	-231.818	-479.667	-231.818	-247.847	-247.847	-231.818	-479.666	-231.818	-247.846	-247.847	-231.818	-479.667	-231.819	-247.847	-247.847	-231.819	-479.668	-231.819	-247.847	-247.847	-231.819	-479.668	-231.819	-247.847	-247.848	-231.819	-479.668	-231.819	-247.847	-247.848	-231.819	-479.668	-231.819	-247.847	-247.847
27_Benzene-Pyridine_pi-pi_2.00_dimer.out	-479.666	-231.819	-247.847	-247.847	-231.819	-479.665	-231.818	-247.847	-247.847	-231.818	-479.665	-231.818	-247.847	-247.847	-231.818	-479.665	-231.818	-247.847	-247.847	-231.818	-479.665	-231.818	-247.846	-247.846	-231.818	-479.666	-231.819	-247.847	-247.847	-231.819	-479.666	-231.819	-247.847	-247.847	-231.819	-479.667	-231.819	-247.847	-247.847	-231.819	-479.667	-231.819	-247.847	-247.847	-231.819	-479.666	-231.819	-247.847	-247.847
28_Benzene-Uracil_pi-pi_0.90_dimer.out	-646.033	-231.819	-414.206	-414.208	-231.821	-646.028	-231.818	-414.205	-414.206	-231.819	-646.031	-231.818	-414.206	-414.207	-231.82	-646.031	-231.818	-414.205	-414.207	-231.82	-646.028	-231.818	-414.203	-414.205	-231.82	-646.032	-231.819	-414.206	-414.208	-231.821	-646.033	-231.819	-414.205	-414.207	-231.821	-646.033	-231.819	-414.206	-414.208	-231.821	-646.033	-231.819	-414.206	-414.208	-231.821	-646.033	-231.819	-414.206	-414.208
28_Benzene-Uracil_pi-pi_0.95_dimer.out	-646.036	-231.819	-414.206	-414.208	-231.82	-646.031	-231.818	-414.205	-414.205	-231.819	-646.034	-231.818	-414.206	-414.207	-231.82	-646.034	-231.818	-414.205	-414.207	-231.82	-646.031	-231.818	-414.203	-414.205	-231.82	-646.035	-231.819	-414.206	-414.208	-231.82	-646.035	-231.819	-414.205	-414.207	-231.82	-646.035	-231.819	-414.206	-414.207	-231.82	-646.036	-231.819	-414.206	-414.208	-231.82	-646.036	-231.819	-414.206	-414.208
28_Benzene-Uracil_pi-pi_1.00_dimer.out	-646.036	-231.819	-414.206	-414.208	-231.82	-646.032	-231.818	-414.205	-414.205	-231.819	-646.034	-231.818	-414.206	-414.207	-231.819	-646.034	-231.818	-414.205	-414.207	-231.82	-646.032	-231.818	-414.203	-414.205	-231.82	-646.036	-231.819	-414.206	-414.208	-231.82	-646.036	-231.819	-414.205	-414.207	-231.82	-646.036	-231.819	-414.206	-414.207	-231.82	-646.036	-231.819	-414.206	-414.207	-231.82	-646.036	-231.819	-414.206	-414.208
28_Benzene-Uracil_pi-pi_1.05_dimer.out	-646.036	-231.819	-414.206	-414.207	-231.82	-646.032	-231.818	-414.205	-414.205	-231.819	-646.034	-231.818	-414.206	-414.207	-231.819	-646.034	-231.818	-414.205	-414.206	-231.819	-646.031	-231.818	-414.203	-414.204	-231.819	-646.035	-231.819	-414.206	-414.207	-231.82	-646.036	-231.819	-414.205	-414.206	-231.82	-646.036	-231.819	-414.206	-414.207	-231.82	-646.036	-231.819	-414.206	-414.207	-231.82	-646.036	-231.819	-414.206	-414.207
28_Benzene-Uracil_pi-pi_1.10_dimer.out	-646.035	-231.819	-414.206	-414.207	-231.82	-646.031	-231.818	-414.205	-414.205	-231.818	-646.032	-231.818	-414.206	-414.206	-231.819	-646.033	-231.818	-414.205	-414.206	-231.819	-646.031	-231.818	-414.203	-414.204	-231.819	-646.034	-231.819	-414.206	-414.207	-231.82	-646.035	-231.819	-414.205	-414.206	-231.82	-646.035	-231.819	-414.206	-414.207	-231.82	-646.035	-231.819	-414.206	-414.207	-231.82	-646.035	-231.819	-414.206	-414.207
28_Benzene-Uracil_pi-pi_1.25_dimer.out	-646.031	-231.819	-414.206	-414.207	-231.819	-646.028	-231.818	-414.205	-414.205	-231.818	-646.029	-231.818	-414.206	-414.206	-231.819	-646.03	-231.818	-414.205	-414.206	-231.819	-646.028	-231.818	-414.203	-414.204	-231.819	-646.031	-231.819	-414.206	-414.207	-231.819	-646.031	-231.819	-414.205	-414.206	-231.819	-646.031	-231.819	-414.206	-414.206	-231.82	-646.031	-231.819	-414.206	-414.207	-231.819	-646.031	-231.819	-414.206	-414.207
28_Benzene-Uracil_pi-pi_1.50_dimer.out	-646.028	-231.819	-414.206	-414.207	-231.819	-646.025	-231.818	-414.205	-414.205	-231.818	-646.026	-231.818	-414.206	-414.206	-231.818	-646.027	-231.818	-414.205	-414.206	-231.819	-646.024	-231.818	-414.203	-414.203	-231.819	-646.027	-231.819	-414.206	-414.206	-231.819	-646.027	-231.819	-414.205	-414.205	-231.819	-646.027	-231.819	-414.206	-414.206	-231.819	-646.028	-231.819	-414.206	-414.206	-231.819	-646.028	-231.819	-414.206	-414.206
28_Benzene-Uracil_pi-pi_2.00_dimer.out	-646.025	-231.819	-414.206	-414.206	-231.819	-646.023	-231.818	-414.205	-414.205	-231.818	-646.024	-231.818	-414.206	-414.206	-231.818	-646.024	-231.818	-414.205	-414.205	-231.818	-646.022	-231.818	-414.203	-414.203	-231.818	-646.025	-231.819	-414.206	-414.206	-231.819	-646.024	-231.819	-414.205	-414.205	-231.819	-646.025	-231.819	-414.206	-414.206	-231.819	-646.025	-231.819	-414.206	-414.206	-231.819	-646.026	-231.819	-414.206	-414.206
29_Pyridine-Uracil_pi-pi_0.90_dimer.out	-662.062	-247.847	-414.206	-414.208	-247.849	-662.056	-247.847	-414.205	-414.206	-247.847	-662.06	-247.847	-414.206	-414.207	-247.849	-662.06	-247.847	-414.205	-414.207	-247.849	-662.056	-247.846	-414.203	-414.205	-247.848	-662.061	-247.847	-414.206	-414.208	-247.849	-662.062	-247.847	-414.205	-414.207	-247.849	-662.062	-247.847	-414.206	-414.208	-247.849	-662.062	-247.847	-414.206	-414.208	-247.849	-662.062	-247.847	-414.206	-414.208
29_Pyridine-Uracil_pi-pi_0.95_dimer.out	-662.066	-247.847	-414.206	-414.208	-247.849	-662.061	-247.847	-414.205	-414.205	-247.847	-662.064	-247.847	-414.206	-414.207	-247.848	-662.063	-247.847	-414.205	-414.207	-247.848	-662.06	-247.846	-414.203	-414.205	-247.848	-662.065	-247.847	-414.206	-414.208	-247.849	-662.065	-247.847	-414.205	-414.207	-247.849	-662.065	-247.847	-414.206	-414.207	-247.849	-662.066	-247.847	-414.206	-414.208	-247.849	-662.066	-247.847	-414.206	-414.208
29_Pyridine-Uracil_pi-pi_1.00_dimer.out	-662.066	-247.847	-414.206	-414.208	-247.849	-662.062	-247.847	-414.205	-414.205	-247.847	-662.064	-247.847	-414.206	-414.207	-247.848	-662.064	-247.847	-414.205	-414.207	-247.848	-662.061	-247.846	-414.203	-414.205	-247.848	-662.066	-247.847	-414.206	-414.207	-247.849	-662.066	-247.847	-414.205	-414.206	-247.849	-662.066	-247.847	-414.206	-414.207	-247.849	-662.066	-247.847	-414.206	-414.207	-247.849	-662.066	-247.847	-414.206	-414.207
29_Pyridine-Uracil_pi-pi_1.05_dimer.out	-662.066	-247.847	-414.206	-414.207	-247.848	-662.062	-247.847	-414.205	-414.205	-247.847	-662.064	-247.847	-414.206	-414.206	-247.848	-662.064	-247.847	-414.205	-414.206	-247.848	-662.061	-247.846	-414.203	-414.204	-247.848	-662.065	-247.847	-414.206	-414.207	-247.848	-662.066	-247.847	-414.205	-414.206	-247.848	-662.066	-247.847	-414.206	-414.207	-247.849	-662.066	-247.847	-414.206	-414.207	-247.849	-662.066	-247.847	-414.206	-414.207
29_Pyridine-Uracil_pi-pi_1.10_dimer.out	-662.065	-247.847	-414.206	-414.207	-247.848	-662.061	-247.847	-414.205	-414.205	-247.847	-662.062	-247.847	-414.206	-414.206	-247.847	-662.063	-247.847	-414.205	-414.206	-247.848	-662.06	-247.846	-414.203	-414.204	-247.847	-662.064	-247.847	-414.206	-414.207	-247.848	-662.064	-247.847	-414.205	-414.206	-247.848	-662.064	-247.847	-414.206	-414.207	-247.848	-662.065	-247.847	-414.206	-414.207	-247.848	-662.065	-247.847	-414.206	-414.207
29_Pyridine-Uracil_pi-pi_1.25_dimer.out	-662.061	-247.847	-414.206	-414.207	-247.848	-662.058	-247.847	-414.205	-414.205	-247.847	-662.059	-247.847	-414.206	-414.206	-247.847	-662.059	-247.847	-414.205	-414.206	-247.847	-662.057	-247.846	-414.203	-414.204	-247.847	-662.06	-247.847	-414.206	-414.207	-247.848	-662.06	-247.847	-414.205	-414.206	-247.848	-662.061	-247.847	-414.206	-414.206	-247.848	-662.061	-247.847	-414.206	-414.207	-247.848	-662.061	-247.847	-414.206	-414.207
29_Pyridine-Uracil_pi-pi_1.50_dimer.out	-662.057	-247.847	-414.206	-414.206	-247.848	-662.054	-247.847	-414.205	-414.205	-247.847	-662.055	-247.847	-414.206	-414.206	-247.847	-662.056	-247.847	-414.205	-414.205	-247.847	-662.053	-247.846	-414.203	-414.203	-247.847	-662.056	-247.847	-414.206	-414.206	-247.847	-662.056	-247.847	-414.205	-414.205	-247.848	-662.057	-247.847	-414.206	-414.206	-247.848	-662.057	-247.847	-414.206	-414.206	-247.848	-662.057	-247.847	-414.206	-414.206
29_Pyridine-Uracil_pi-pi_2.00_dimer.out	-662.054	-247.847	-414.206	-414.206	-247.847	-662.052	-247.847	-414.205	-414.205	-247.847	-662.053	-247.847	-414.206	-414.206	-247.847	-662.053	-247.847	-414.205	-414.205	-247.847	-662.05	-247.846	-414.203	-414.203	-247.846	-662.054	-247.847	-414.206	-414.206	-247.847	-662.053	-247.847	-414.205	-414.205	-247.847	-662.054	-247.847	-414.206	-414.206	-247.847	-662.054	-247.847	-414.206	-414.206	-247.847	-662.054	-247.847	-414.206	-414.206
30_Benzene-Ethene_0.90_dimer.out	-310.262	-231.819	-78.4427	-78.4433	-231.819	-310.261	-231.818	-78.4427	-78.4429	-231.818	-310.262	-231.818	-78.4426	-78.4432	-231.819	-310.262	-231.818	-78.4427	-78.4433	-231.819	-310.262	-231.818	-78.4427	-78.4434	-231.819	-310.262	-231.819	-78.4427	-78.4433	-231.819	-310.263	-231.819	-78.4427	-78.4434	-231.82	-310.263	-231.819	-78.4427	-78.4433	-231.82	-310.262	-231.819	-78.4427	-78.4433	-231.82	-310.262	-231.819	-78.4427	-78.4433
30_Benzene-Ethene_0.95_dimer.out	-310.264	-231.819	-78.4427	-78.4432	-231.819	-310.262	-231.818	-78.4427	-78.4429	-231.818	-310.263	-231.818	-78.4426	-78.4431	-231.819	-310.263	-231.818	-78.4427	-78.4432	-231.819	-310.263	-231.818	-78.4427	-78.4433	-231.819	-310.264	-231.819	-78.4427	-78.4432	-231.819	-310.264	-231.819	-78.4427	-78.4433	-231.819	-310.264	-231.819	-78.4427	-78.4432	-231.82	-310.264	-231.819	-78.4427	-78.4432	-231.819	-310.264	-231.819	-78.4427	-78.4432
30_Benzene-Ethene_1.00_dimer.out	-310.264	-231.819	-78.4427	-78.4431	-231.819	-310.263	-231.818	-78.4427	-78.4429	-231.818	-310.263	-231.818	-78.4426	-78.443	-231.819	-310.264	-231.818	-78.4427	-78.4431	-231.819	-310.263	-231.818	-78.4427	-78.4432	-231.819	-310.264	-231.819	-78.4427	-78.4431	-231.819	-310.265	-231.819	-78.4427	-78.4432	-231.819	-310.264	-231.819	-78.4427	-78.4431	-231.819	-310.264	-231.819	-78.4427	-78.4431	-231.819	-310.264	-231.819	-78.4427	-78.4431
30_Benzene-Ethene_1.05_dimer.out	-310.264	-231.819	-78.4427	-78.443	-231.819	-310.263	-231.818	-78.4427	-78.4429	-231.818	-310.263	-231.818	-78.4426	-78.4429	-231.818	-310.264	-231.818	-78.4427	-78.443	-231.819	-310.264	-231.818	-78.4427	-78.4431	-231.819	-310.264	-231.819	-78.4427	-78.443	-231.819	-310.265	-231.819	-78.4427	-78.4431	-231.819	-310.264	-231.819	-78.4427	-78.443	-231.819	-310.264	-231.819	-78.4427	-78.443	-231.819	-310.264	-231.819	-78.4427	-78.443
30_Benzene-Ethene_1.10_dimer.out	-310.264	-231.819	-78.4427	-78.4429	-231.819	-310.263	-231.818	-78.4427	-78.4428	-231.818	-310.263	-231.818	-78.4426	-78.4428	-231.818	-310.263	-231.818	-78.4427	-78.4429	-231.819	-310.263	-231.818	-78.4427	-78.443	-231.819	-310.264	-231.819	-78.4427	-78.443	-231.819	-310.264	-231.819	-78.4427	-78.443	-231.819	-310.264	-231.819	-78.4427	-78.443	-231.819	-310.264	-231.819	-78.4427	-78.4429	-231.819	-310.264	-231.819	-78.4427	-78.4429
30_Benzene-Ethene_1.25_dimer.out	-310.263	-231.819	-78.4427	-78.4428	-231.819	-310.262	-231.818	-78.4427	-78.4428	-231.818	-310.262	-231.818	-78.4426	-78.4427	-231.818	-310.262	-231.818	-78.4427	-78.4428	-231.818	-310.262	-231.818	-78.4427	-78.4429	-231.818	-310.263	-231.819	-78.4427	-78.4429	-231.819	-310.263	-231.819	-78.4427	-78.4429	-231.819	-310.263	-231.819	-78.4427	-78.4428	-231.819	-310.263	-231.819	-78.4427	-78.4428	-231.819	-310.263	-231.819	-78.4427	-78.4428
30_Benzene-Ethene_1.50_dimer.out	-310.262	-231.819	-78.4427	-78.4427	-231.819	-310.261	-231.818	-78.4427	-78.4427	-231.818	-310.261	-231.818	-78.4426	-78.4426	-231.818	-310.261	-231.818	-78.4427	-78.4427	-231.818	-310.261	-231.818	-78.4427	-78.4428	-231.818	-310.262	-231.819	-78.4427	-78.4428	-231.819	-310.262	-231.819	-78.4427	-78.4428	-231.819	-310.262	-231.819	-78.4427	-78.4427	-231.819	-310.262	-231.819	-78.4427	-78.4427	-231.819	-310.262	-231.819	-78.4427	-78.4427
30_Benzene-Ethene_2.00_dimer.out	-310.261	-231.819	-78.4427	-78.4427	-231.819	-310.261	-231.818	-78.4427	-78.4427	-231.818	-310.261	-231.818	-78.4426	-78.4426	-231.818	-310.261	-231.818	-78.4427	-78.4427	-231.818	-310.261	-231.818	-78.4427	-78.4427	-231.818	-310.261	-231.819	-78.4427	-78.4427	-231.819	-310.262	-231.819	-78.4427	-78.4427	-231.819	-310.262	-231.819	-78.4427	-78.4427	-231.819	-310.261	-231.819	-78.4427	-78.4427	-231.819	-310.261	-231.819	-78.4427	-78.4427
31_Uracil-Ethene_0.90_dimer.out	-492.654	-414.206	-78.4427	-78.4435	-414.207	-492.651	-414.205	-78.4427	-78.443	-414.205	-492.653	-414.206	-78.4426	-78.4434	-414.207	-492.653	-414.205	-78.4427	-78.4435	-414.206	-492.65	-414.203	-78.4428	-78.4436	-414.204	-492.654	-414.206	-78.4427	-78.4435	-414.207	-492.653	-414.205	-78.4428	-78.4435	-414.206	-492.654	-414.206	-78.4427	-78.4435	-414.207	-492.654	-414.206	-78.4427	-78.4434	-414.207	-492.654	-414.206	-78.4427	-78.4434
31_Uracil-Ethene_0.95_dimer.out	-492.655	-414.206	-78.4427	-78.4433	-414.207	-492.652	-414.205	-78.4427	-78.443	-414.205	-492.654	-414.206	-78.4426	-78.4432	-414.206	-492.654	-414.205	-78.4427	-78.4434	-414.206	-492.652	-414.203	-78.4428	-78.4435	-414.204	-492.655	-414.206	-78.4427	-78.4434	-414.207	-492.654	-414.205	-78.4428	-78.4434	-414.206	-492.655	-414.206	-78.4427	-78.4433	-414.207	-492.655	-414.206	-78.4427	-78.4433	-414.207	-492.655	-414.206	-78.4427	-78.4433
31_Uracil-Ethene_1.00_dimer.out	-492.655	-414.206	-78.4427	-78.4432	-414.207	-492.653	-414.205	-78.4427	-78.4429	-414.205	-492.654	-414.206	-78.4426	-78.4431	-414.206	-492.654	-414.205	-78.4427	-78.4433	-414.206	-492.652	-414.203	-78.4428	-78.4433	-414.204	-492.655	-414.206	-78.4427	-78.4433	-414.207	-492.654	-414.205	-78.4428	-78.4433	-414.206	-492.655	-414.206	-78.4427	-78.4433	-414.206	-492.655	-414.206	-78.4427	-78.4432	-414.207	-492.655	-414.206	-78.4427	-78.4432
31_Uracil-Ethene_1.05_dimer.out	-492.655	-414.206	-78.4427	-78.4432	-414.207	-492.653	-414.205	-78.4427	-78.4429	-414.205	-492.654	-414.206	-78.4426	-78.443	-414.206	-492.654	-414.205	-78.4427	-78.4432	-414.206	-492.652	-414.203	-78.4428	-78.4433	-414.204	-492.655	-414.206	-78.4427	-78.4432	-414.207	-492.654	-414.205	-78.4428	-78.4432	-414.206	-492.654	-414.206	-78.4427	-78.4432	-414.206	-492.655	-414.206	-78.4427	-78.4432	-414.207	-492.655	-414.206	-78.4427	-78.4431
31_Uracil-Ethene_1.10_dimer.out	-492.654	-414.206	-78.4427	-78.4431	-414.207	-492.652	-414.205	-78.4427	-78.4429	-414.205	-492.653	-414.206	-78.4426	-78.4429	-414.206	-492.653	-414.205	-78.4427	-78.4431	-414.206	-492.651	-414.203	-78.4428	-78.4432	-414.204	-492.654	-414.206	-78.4427	-78.4431	-414.207	-492.654	-414.205	-78.4428	-78.4432	-414.206	-492.654	-414.206	-78.4427	-78.4431	-414.206	-492.654	-414.206	-78.4427	-78.4431	-414.207	-492.654	-414.206	-78.4427	-78.4431
31_Uracil-Ethene_1.25_dimer.out	-492.653	-414.206	-78.4427	-78.443	-414.207	-492.651	-414.205	-78.4427	-78.4429	-414.205	-492.652	-414.206	-78.4426	-78.4428	-414.206	-492.652	-414.205	-78.4427	-78.443	-414.206	-492.65	-414.203	-78.4428	-78.443	-414.204	-492.652	-414.206	-78.4427	-78.443	-414.206	-492.652	-414.205	-78.4428	-78.443	-414.205	-492.652	-414.206	-78.4427	-78.443	-414.206	-492.652	-414.206	-78.4427	-78.4429	-414.206	-492.653	-414.206	-78.4427	-78.4429
31_Uracil-Ethene_1.50_dimer.out	-492.651	-414.206	-78.4427	-78.4428	-414.206	-492.649	-414.205	-78.4427	-78.4428	-414.205	-492.65	-414.206	-78.4426	-78.4427	-414.206	-492.65	-414.205	-78.4427	-78.4428	-414.205	-492.648	-414.203	-78.4428	-78.4429	-414.203	-492.651	-414.206	-78.4427	-78.4429	-414.206	-492.65	-414.205	-78.4428	-78.4429	-414.205	-492.65	-414.206	-78.4427	-78.4428	-414.206	-492.651	-414.206	-78.4427	-78.4428	-414.206	-492.651	-414.206	-78.4427	-78.4428
31_Uracil-Ethene_2.00_dimer.out	-492.649	-414.206	-78.4427	-78.4427	-414.206	-492.648	-414.205	-78.4427	-78.4427	-414.205	-492.649	-414.206	-78.4426	-78.4427	-414.206	-492.648	-414.205	-78.4427	-78.4427	-414.205	-492.646	-414.203	-78.4428	-78.4428	-414.203	-492.649	-414.206	-78.4427	-78.4428	-414.206	-492.648	-414.205	-78.4428	-78.4428	-414.205	-492.649	-414.206	-78.4427	-78.4427	-414.206	-492.649	-414.206	-78.4427	-78.4427	-414.206	-492.649	-414.206	-78.4427	-78.4427
32_Uracil-Ethyne_0.90_dimer.out	-491.403	-414.206	-77.1915	-77.1923	-414.207	-491.4	-414.205	-77.1915	-77.1919	-414.205	-491.402	-414.206	-77.1915	-77.1922	-414.206	-491.402	-414.205	-77.1916	-77.1923	-414.206	-491.4	-414.203	-77.1917	-77.1924	-414.204	-491.403	-414.206	-77.1916	-77.1924	-414.207	-491.402	-414.205	-77.1915	-77.1923	-414.206	-491.402	-414.206	-77.1915	-77.1923	-414.207	-491.403	-414.206	-77.1915	-77.1923	-414.207	-491.403	-414.206	-77.1915	-77.1923
32_Uracil-Ethyne_0.95_dimer.out	-491.404	-414.206	-77.1915	-77.1921	-414.207	-491.402	-414.205	-77.1915	-77.1918	-414.205	-491.403	-414.206	-77.1915	-77.1921	-414.206	-491.403	-414.205	-77.1916	-77.1922	-414.206	-491.401	-414.203	-77.1917	-77.1923	-414.204	-491.404	-414.206	-77.1916	-77.1922	-414.207	-491.403	-414.205	-77.1915	-77.1922	-414.206	-491.404	-414.206	-77.1915	-77.1922	-414.206	-491.404	-414.206	-77.1915	-77.1921	-414.207	-491.404	-414.206	-77.1915	-77.1921
32_Uracil-Ethyne_1.00_dimer.out	-491.404	-414.206	-77.1915	-77.192	-414.207	-491.402	-414.205	-77.1915	-77.1918	-414.205	-491.404	-414.206	-77.1915	-77.192	-414.206	-491.403	-414.205	-77.1916	-77.1921	-414.206	-491.401	-414.203	-77.1917	-77.1922	-414.204	-491.404	-414.206	-77.1916	-77.1921	-414.207	-491.404	-414.205	-77.1915	-77.192	-414.206	-491.404	-414.206	-77.1915	-77.1921	-414.206	-491.404	-414.206	-77.1915	-77.192	-414.207	-491.404	-414.206	-77.1915	-77.192
32_Uracil-Ethyne_1.05_dimer.out	-491.404	-414.206	-77.1915	-77.192	-414.207	-491.402	-414.205	-77.1915	-77.1918	-414.205	-491.403	-414.206	-77.1915	-77.1919	-414.206	-491.403	-414.205	-77.1916	-77.192	-414.206	-491.401	-414.203	-77.1917	-77.1921	-414.204	-491.404	-414.206	-77.1916	-77.192	-414.207	-491.403	-414.205	-77.1915	-77.192	-414.206	-491.404	-414.206	-77.1915	-77.192	-414.206	-491.404	-414.206	-77.1915	-77.1919	-414.207	-491.404	-414.206	-77.1915	-77.1919
32_Uracil-Ethyne_1.10_dimer.out	-491.404	-414.206	-77.1915	-77.1919	-414.207	-491.401	-414.205	-77.1915	-77.1917	-414.205	-491.403	-414.206	-77.1915	-77.1918	-414.206	-491.403	-414.205	-77.1916	-77.192	-414.206	-491.4	-414.203	-77.1917	-77.192	-414.204	-491.403	-414.206	-77.1916	-77.192	-414.207	-491.403	-414.205	-77.1915	-77.1919	-414.206	-491.403	-414.206	-77.1915	-77.1919	-414.206	-491.403	-414.206	-77.1915	-77.1919	-414.207	-491.403	-414.206	-77.1915	-77.1919
32_Uracil-Ethyne_1.25_dimer.out	-491.402	-414.206	-77.1915	-77.1917	-414.206	-491.4	-414.205	-77.1915	-77.1916	-414.205	-491.401	-414.206	-77.1915	-77.1917	-414.206	-491.401	-414.205	-77.1916	-77.1918	-414.205	-491.399	-414.203	-77.1917	-77.1919	-414.203	-491.402	-414.206	-77.1916	-77.1918	-414.206	-491.401	-414.205	-77.1915	-77.1918	-414.205	-491.401	-414.206	-77.1915	-77.1917	-414.206	-491.401	-414.206	-77.1915	-77.1917	-414.206	-491.402	-414.206	-77.1915	-77.1917
32_Uracil-Ethyne_1.50_dimer.out	-491.4	-414.206	-77.1915	-77.1916	-414.206	-491.398	-414.205	-77.1915	-77.1916	-414.205	-491.399	-414.206	-77.1915	-77.1916	-414.206	-491.399	-414.205	-77.1916	-77.1917	-414.205	-491.397	-414.203	-77.1917	-77.1918	-414.203	-491.399	-414.206	-77.1916	-77.1917	-414.206	-491.399	-414.205	-77.1915	-77.1916	-414.205	-491.399	-414.206	-77.1915	-77.1916	-414.206	-491.399	-414.206	-77.1915	-77.1916	-414.206	-491.399	-414.206	-77.1915	-77.1916
32_Uracil-Ethyne_2.00_dimer.out	-491.398	-414.206	-77.1915	-77.1915	-414.206	-491.397	-414.205	-77.1915	-77.1915	-414.205	-491.398	-414.206	-77.1915	-77.1915	-414.206	-491.397	-414.205	-77.1916	-77.1916	-414.205	-491.395	-414.203	-77.1917	-77.1917	-414.203	-491.398	-414.206	-77.1916	-77.1916	-414.206	-491.397	-414.205	-77.1915	-77.1915	-414.205	-491.398	-414.206	-77.1915	-77.1915	-414.206	-491.398	-414.206	-77.1915	-77.1915	-414.206	-491.398	-414.206	-77.1915	-77.1915
33_Pyridine-Ethene_0.90_dimer.out	-326.292	-247.847	-78.4427	-78.4433	-247.848	-326.29	-247.847	-78.4427	-78.443	-247.847	-326.291	-247.847	-78.4426	-78.4433	-247.848	-326.291	-247.847	-78.4427	-78.4433	-247.848	-326.291	-247.846	-78.4427	-78.4434	-247.847	-326.292	-247.847	-78.4427	-78.4434	-247.848	-326.292	-247.847	-78.4428	-78.4434	-247.848	-326.292	-247.847	-78.4427	-78.4434	-247.848	-326.292	-247.847	-78.4427	-78.4433	-247.848	-326.292	-247.847	-78.4427	-78.4433
33_Pyridine-Ethene_0.95_dimer.out	-326.293	-247.847	-78.4427	-78.4432	-247.848	-326.292	-247.847	-78.4427	-78.4429	-247.847	-326.292	-247.847	-78.4426	-78.4431	-247.847	-326.293	-247.847	-78.4427	-78.4432	-247.847	-326.292	-247.846	-78.4427	-78.4433	-247.847	-326.293	-247.847	-78.4427	-78.4433	-247.848	-326.294	-247.847	-78.4428	-78.4433	-247.848	-326.293	-247.847	-78.4427	-78.4433	-247.848	-326.293	-247.847	-78.4427	-78.4432	-247.848	-326.293	-247.847	-78.4427	-78.4432
33_Pyridine-Ethene_1.00_dimer.out	-326.293	-247.847	-78.4427	-78.4431	-247.848	-326.292	-247.847	-78.4427	-78.4429	-247.847	-326.293	-247.847	-78.4426	-78.443	-247.847	-326.293	-247.847	-78.4427	-78.4431	-247.847	-326.292	-247.846	-78.4427	-78.4432	-247.847	-326.293	-247.847	-78.4427	-78.4432	-247.848	-326.294	-247.847	-78.4428	-78.4432	-247.848	-326.294	-247.847	-78.4427	-78.4432	-247.848	-326.294	-247.847	-78.4427	-78.4431	-247.848	-326.294	-247.847	-78.4427	-78.4431
33_Pyridine-Ethene_1.05_dimer.out	-326.293	-247.847	-78.4427	-78.4431	-247.848	-326.292	-247.847	-78.4427	-78.4429	-247.847	-326.293	-247.847	-78.4426	-78.4429	-247.847	-326.293	-247.847	-78.4427	-78.4431	-247.847	-326.292	-247.846	-78.4427	-78.4431	-247.847	-326.293	-247.847	-78.4427	-78.4431	-247.848	-326.294	-247.847	-78.4428	-78.4431	-247.848	-326.294	-247.847	-78.4427	-78.4431	-247.848	-326.294	-247.847	-78.4427	-78.443	-247.848	-326.293	-247.847	-78.4427	-78.443
33_Pyridine-Ethene_1.10_dimer.out	-326.293	-247.847	-78.4427	-78.443	-247.848	-326.292	-247.847	-78.4427	-78.4429	-247.847	-326.292	-247.847	-78.4426	-78.4428	-247.847	-326.293	-247.847	-78.4427	-78.443	-247.847	-326.292	-247.846	-78.4427	-78.4431	-247.847	-326.293	-247.847	-78.4427	-78.443	-247.848	-326.294	-247.847	-78.4428	-78.4431	-247.848	-326.293	-247.847	-78.4427	-78.443	-247.848	-326.293	-247.847	-78.4427	-78.443	-247.848	-326.293	-247.847	-78.4427	-78.443
33_Pyridine-Ethene_1.25_dimer.out	-326.292	-247.847	-78.4427	-78.4429	-247.847	-326.291	-247.847	-78.4427	-78.4428	-247.847	-326.291	-247.847	-78.4426	-78.4427	-247.847	-326.291	-247.847	-78.4427	-78.4429	-247.847	-326.291	-247.846	-78.4427	-78.4429	-247.847	-326.292	-247.847	-78.4427	-78.4429	-247.847	-326.292	-247.847	-78.4428	-78.4429	-247.848	-326.292	-247.847	-78.4427	-78.4429	-247.848	-326.292	-247.847	-78.4427	-78.4429	-247.848	-326.292	-247.847	-78.4427	-78.4428
33_Pyridine-Ethene_1.50_dimer.out	-326.291	-247.847	-78.4427	-78.4428	-247.847	-326.29	-247.847	-78.4427	-78.4427	-247.847	-326.29	-247.847	-78.4426	-78.4427	-247.847	-326.29	-247.847	-78.4427	-78.4428	-247.847	-326.29	-247.846	-78.4427	-78.4428	-247.846	-326.291	-247.847	-78.4427	-78.4428	-247.847	-326.291	-247.847	-78.4428	-78.4428	-247.847	-326.291	-247.847	-78.4427	-78.4428	-247.848	-326.291	-247.847	-78.4427	-78.4427	-247.847	-326.291	-247.847	-78.4427	-78.4427
33_Pyridine-Ethene_2.00_dimer.out	-326.29	-247.847	-78.4427	-78.4427	-247.847	-326.289	-247.847	-78.4427	-78.4427	-247.847	-326.289	-247.847	-78.4426	-78.4426	-247.847	-326.29	-247.847	-78.4427	-78.4427	-247.847	-326.289	-247.846	-78.4427	-78.4428	-247.846	-326.29	-247.847	-78.4427	-78.4427	-247.847	-326.29	-247.847	-78.4428	-78.4428	-247.847	-326.29	-247.847	-78.4427	-78.4427	-247.847	-326.29	-247.847	-78.4427	-78.4427	-247.847	-326.29	-247.847	-78.4427	-78.4427
34_Pentane-Pentane_0.90_dimer.out	-394.813	-197.404	-197.404	-197.405	-197.405	-394.811	-197.404	-197.404	-197.404	-197.404	-394.812	-197.404	-197.404	-197.404	-197.404	-394.812	-197.404	-197.404	-197.404	-197.404	-394.812	-197.404	-197.404	-197.404	-197.404	-394.813	-197.404	-197.404	-197.405	-197.405	-394.813	-197.404	-197.404	-197.404	-197.404	-394.813	-197.404	-197.404	-197.404	-197.404	-394.813	-197.404	-197.404	-197.404	-197.404	-394.813	-197.404	-197.404	-197.404
34_Pentane-Pentane_0.95_dimer.out	-394.814	-197.404	-197.404	-197.405	-197.405	-394.812	-197.404	-197.404	-197.404	-197.404	-394.813	-197.404	-197.404	-197.404	-197.404	-394.814	-197.404	-197.404	-197.404	-197.404	-394.813	-197.404	-197.404	-197.404	-197.404	-394.814	-197.404	-197.404	-197.405	-197.405	-394.814	-197.404	-197.404	-197.404	-197.404	-394.814	-197.404	-197.404	-197.404	-197.404	-394.814	-197.404	-197.404	-197.404	-197.404	-394.814	-197.404	-197.404	-197.404
34_Pentane-Pentane_1.00_dimer.out	-394.814	-197.404	-197.404	-197.405	-197.405	-394.813	-197.404	-197.404	-197.404	-197.404	-394.813	-197.404	-197.404	-197.404	-197.404	-394.814	-197.404	-197.404	-197.404	-197.404	-394.813	-197.404	-197.404	-197.404	-197.404	-394.814	-197.404	-197.404	-197.404	-197.404	-394.814	-197.404	-197.404	-197.404	-197.404	-394.814	-197.404	-197.404	-197.404	-197.404	-394.814	-197.404	-197.404	-197.404	-197.404	-394.814	-197.404	-197.404	-197.404
34_Pentane-Pentane_1.05_dimer.out	-394.814	-197.404	-197.404	-197.404	-197.404	-394.812	-197.404	-197.404	-197.404	-197.404	-394.813	-197.404	-197.404	-197.404	-197.404	-394.813	-197.404	-197.404	-197.404	-197.404	-394.813	-197.404	-197.404	-197.404	-197.404	-394.814	-197.404	-197.404	-197.404	-197.404	-394.814	-197.404	-197.404	-197.404	-197.404	-394.814	-197.404	-197.404	-197.404	-197.404	-394.814	-197.404	-197.404	-197.404	-197.404	-394.814	-197.404	-197.404	-197.404
34_Pentane-Pentane_1.10_dimer.out	-394.814	-197.404	-197.404	-197.404	-197.404	-394.812	-197.404	-197.404	-197.404	-197.404	-394.812	-197.404	-197.404	-197.404	-197.404	-394.813	-197.404	-197.404	-197.404	-197.404	-394.813	-197.404	-197.404	-197.404	-197.404	-394.813	-197.404	-197.404	-197.404	-197.404	-394.813	-197.404	-197.404	-197.404	-197.404	-394.813	-197.404	-197.404	-197.404	-197.404	-394.813	-197.404	-197.404	-197.404	-197.404	-394.813	-197.404	-197.404	-197.404
34_Pentane-Pentane_1.25_dimer.out	-394.812	-197.404	-197.404	-197.404	-197.404	-394.81	-197.404	-197.404	-197.404	-197.404	-394.811	-197.404	-197.404	-197.404	-197.404	-394.811	-197.404	-197.404	-197.404	-197.404	-394.811	-197.404	-197.404	-197.404	-197.404	-394.812	-197.404	-197.404	-197.404	-197.404	-394.811	-197.404	-197.404	-197.404	-197.404	-394.812	-197.404	-197.404	-197.404	-197.404	-394.812	-197.404	-197.404	-197.404	-197.404	-394.812	-197.404	-197.404	-197.404
34_Pentane-Pentane_1.50_dimer.out	-394.81	-197.404	-197.404	-197.404	-197.404	-394.809	-197.404	-197.404	-197.404	-197.404	-394.809	-197.404	-197.404	-197.404	-197.404	-394.809	-197.404	-197.404	-197.404	-197.404	-394.809	-197.404	-197.404	-197.404	-197.404	-394.81	-197.404	-197.404	-197.404	-197.404	-394.809	-197.404	-197.404	-197.404	-197.404	-394.809	-197.404	-197.404	-197.404	-197.404	-394.81	-197.404	-197.404	-197.404	-197.404	-394.81	-197.404	-197.404	-197.404
34_Pentane-Pentane_2.00_dimer.out	-394.808	-197.404	-197.404	-197.404	-197.404	-394.807	-197.404	-197.404	-197.404	-197.404	-394.808	-197.404	-197.404	-197.404	-197.404	-394.808	-197.404	-197.404	-197.404	-197.404	-394.808	-197.404	-197.404	-197.404	-197.404	-394.808	-197.404	-197.404	-197.404	-197.404	-394.808	-197.404	-197.404	-197.404	-197.404	-394.808	-197.404	-197.404	-197.404	-197.404	-394.808	-197.404	-197.404	-197.404	-197.404	-394.808	-197.404	-197.404	-197.404
35_Neopentane-Pentane_0.90_dimer.out	-394.818	-197.404	-197.41	-197.411	-197.405	-394.816	-197.404	-197.41	-197.41	-197.404	-394.817	-197.404	-197.41	-197.411	-197.404	-394.817	-197.404	-197.41	-197.411	-197.404	-394.817	-197.404	-197.41	-197.411	-197.404	-394.818	-197.404	-197.41	-197.411	-197.405	-394.817	-197.404	-197.41	-197.411	-197.404	-394.817	-197.404	-197.41	-197.411	-197.404	-394.818	-197.404	-197.41	-197.411	-197.404	-394.818	-197.404	-197.41	-197.411
35_Neopentane-Pentane_0.95_dimer.out	-394.819	-197.404	-197.41	-197.411	-197.404	-394.817	-197.404	-197.41	-197.41	-197.404	-394.818	-197.404	-197.41	-197.41	-197.404	-394.818	-197.404	-197.41	-197.411	-197.404	-394.818	-197.404	-197.41	-197.41	-197.404	-394.819	-197.404	-197.41	-197.411	-197.404	-394.818	-197.404	-197.41	-197.411	-197.404	-394.818	-197.404	-197.41	-197.411	-197.404	-394.819	-197.404	-197.41	-197.411	-197.404	-394.819	-197.404	-197.41	-197.411
35_Neopentane-Pentane_1.00_dimer.out	-394.819	-197.404	-197.41	-197.411	-197.404	-394.817	-197.404	-197.41	-197.41	-197.404	-394.818	-197.404	-197.41	-197.41	-197.404	-394.818	-197.404	-197.41	-197.411	-197.404	-394.818	-197.404	-197.41	-197.41	-197.404	-394.819	-197.404	-197.41	-197.411	-197.404	-394.818	-197.404	-197.41	-197.41	-197.404	-394.819	-197.404	-197.41	-197.411	-197.404	-394.819	-197.404	-197.41	-197.411	-197.404	-394.819	-197.404	-197.41	-197.411
35_Neopentane-Pentane_1.05_dimer.out	-394.819	-197.404	-197.41	-197.411	-197.404	-394.817	-197.404	-197.41	-197.41	-197.404	-394.818	-197.404	-197.41	-197.41	-197.404	-394.818	-197.404	-197.41	-197.411	-197.404	-394.818	-197.404	-197.41	-197.41	-197.404	-394.818	-197.404	-197.41	-197.411	-197.404	-394.818	-197.404	-197.41	-197.41	-197.404	-394.818	-197.404	-197.41	-197.411	-197.404	-394.819	-197.404	-197.41	-197.411	-197.404	-394.819	-197.404	-197.41	-197.411
35_Neopentane-Pentane_1.10_dimer.out	-394.818	-197.404	-197.41	-197.411	-197.404	-394.817	-197.404	-197.41	-197.41	-197.404	-394.817	-197.404	-197.41	-197.41	-197.404	-394.818	-197.404	-197.41	-197.411	-197.404	-394.817	-197.404	-197.41	-197.41	-197.404	-394.818	-197.404	-197.41	-197.411	-197.404	-394.818	-197.404	-197.41	-197.41	-197.404	-394.818	-197.404	-197.41	-197.41	-197.404	-394.818	-197.404	-197.41	-197.411	-197.404	-394.818	-197.404	-197.41	-197.411
35_Neopentane-Pentane_1.25_dimer.out	-394.817	-197.404	-197.41	-197.411	-197.404	-394.816	-197.404	-197.41	-197.41	-197.404	-394.816	-197.404	-197.41	-197.41	-197.404	-394.817	-197.404	-197.41	-197.41	-197.404	-394.816	-197.404	-197.41	-197.41	-197.404	-394.817	-197.404	-197.41	-197.411	-197.404	-394.816	-197.404	-197.41	-197.41	-197.404	-394.817	-197.404	-197.41	-197.41	-197.404	-394.817	-197.404	-197.41	-197.41	-197.404	-394.817	-197.404	-197.41	-197.411
35_Neopentane-Pentane_1.50_dimer.out	-394.816	-197.404	-197.41	-197.411	-197.404	-394.815	-197.404	-197.41	-197.41	-197.404	-394.815	-197.404	-197.41	-197.41	-197.404	-394.815	-197.404	-197.41	-197.41	-197.404	-394.815	-197.404	-197.41	-197.41	-197.404	-394.816	-197.404	-197.41	-197.411	-197.404	-394.815	-197.404	-197.41	-197.41	-197.404	-394.815	-197.404	-197.41	-197.41	-197.404	-394.815	-197.404	-197.41	-197.41	-197.404	-394.816	-197.404	-197.41	-197.41
35_Neopentane-Pentane_2.00_dimer.out	-394.815	-197.404	-197.41	-197.41	-197.404	-394.814	-197.404	-197.41	-197.41	-197.404	-394.814	-197.404	-197.41	-197.41	-197.404	-394.814	-197.404	-197.41	-197.41	-197.404	-394.814	-197.404	-197.41	-197.41	-197.404	-394.815	-197.404	-197.41	-197.41	-197.404	-394.814	-197.404	-197.41	-197.41	-197.404	-394.814	-197.404	-197.41	-197.41	-197.404	-394.815	-197.404	-197.41	-197.41	-197.404	-394.815	-197.404	-197.41	-197.41
36_Neopentane-Neopentane_0.90_dimer.out	-394.824	-197.41	-197.41	-197.411	-197.411	-394.822	-197.41	-197.41	-197.41	-197.41	-394.823	-197.41	-197.41	-197.41	-197.41	-394.823	-197.41	-197.41	-197.411	-197.411	-394.822	-197.41	-197.41	-197.41	-197.41	-394.823	-197.41	-197.41	-197.411	-197.411	-394.823	-197.41	-197.41	-197.411	-197.411	-394.823	-197.41	-197.41	-197.411	-197.411	-394.823	-197.41	-197.41	-197.411	-197.411	-394.823	-197.41	-197.41	-197.411
36_Neopentane-Neopentane_0.95_dimer.out	-394.824	-197.41	-197.41	-197.411	-197.411	-394.822	-197.41	-197.41	-197.41	-197.41	-394.823	-197.41	-197.41	-197.41	-197.41	-394.823	-197.41	-197.41	-197.411	-197.411	-394.823	-197.41	-197.41	-197.41	-197.41	-394.824	-197.41	-197.41	-197.411	-197.411	-394.823	-197.41	-197.41	-197.41	-197.41	-394.824	-197.41	-197.41	-197.411	-197.411	-394.824	-197.41	-197.41	-197.411	-197.411	-394.824	-197.41	-197.41	-197.411
36_Neopentane-Neopentane_1.00_dimer.out	-394.824	-197.41	-197.41	-197.411	-197.411	-394.822	-197.41	-197.41	-197.41	-197.41	-394.823	-197.41	-197.41	-197.41	-197.41	-394.824	-197.41	-197.41	-197.411	-197.411	-394.823	-197.41	-197.41	-197.41	-197.41	-394.824	-197.41	-197.41	-197.411	-197.411	-394.823	-197.41	-197.41	-197.41	-197.41	-394.824	-197.41	-197.41	-197.41	-197.41	-394.824	-197.41	-197.41	-197.411	-197.411	-394.824	-197.41	-197.41	-197.411
36_Neopentane-Neopentane_1.05_dimer.out	-394.824	-197.41	-197.41	-197.411	-197.411	-394.822	-197.41	-197.41	-197.41	-197.41	-394.823	-197.41	-197.41	-197.41	-197.41	-394.823	-197.41	-197.41	-197.41	-197.41	-394.823	-197.41	-197.41	-197.41	-197.41	-394.824	-197.41	-197.41	-197.411	-197.411	-394.823	-197.41	-197.41	-197.41	-197.41	-394.824	-197.41	-197.41	-197.41	-197.41	-394.824	-197.41	-197.41	-197.411	-197.411	-394.824	-197.41	-197.41	-197.411
36_Neopentane-Neopentane_1.10_dimer.out	-394.824	-197.41	-197.41	-197.411	-197.411	-394.822	-197.41	-197.41	-197.41	-197.41	-394.823	-197.41	-197.41	-197.41	-197.41	-394.823	-197.41	-197.41	-197.41	-197.41	-394.823	-197.41	-197.41	-197.41	-197.41	-394.823	-197.41	-197.41	-197.411	-197.411	-394.823	-197.41	-197.41	-197.41	-197.41	-394.823	-197.41	-197.41	-197.41	-197.41	-394.823	-197.41	-197.41	-197.411	-197.411	-394.823	-197.41	-197.41	-197.411
36_Neopentane-Neopentane_1.25_dimer.out	-394.823	-197.41	-197.41	-197.411	-197.411	-394.821	-197.41	-197.41	-197.41	-197.41	-394.822	-197.41	-197.41	-197.41	-197.41	-394.822	-197.41	-197.41	-197.41	-197.41	-394.822	-197.41	-197.41	-197.41	-197.41	-394.823	-197.41	-197.41	-197.411	-197.411	-394.822	-197.41	-197.41	-197.41	-197.41	-394.822	-197.41	-197.41	-197.41	-197.41	-394.823	-197.41	-197.41	-197.41	-197.41	-394.823	-197.41	-197.41	-197.41
36_Neopentane-Neopentane_1.50_dimer.out	-394.822	-197.41	-197.41	-197.411	-197.411	-394.821	-197.41	-197.41	-197.41	-197.41	-394.821	-197.41	-197.41	-197.41	-197.41	-394.821	-197.41	-197.41	-197.41	-197.41	-394.821	-197.41	-197.41	-197.41	-197.41	-394.822	-197.41	-197.41	-197.41	-197.41	-394.821	-197.41	-197.41	-197.41	-197.41	-394.821	-197.41	-197.41	-197.41	-197.41	-394.822	-197.41	-197.41	-197.41	-197.41	-394.822	-197.41	-197.41	-197.41
36_Neopentane-Neopentane_2.00_dimer.out	-394.821	-197.41	-197.41	-197.41	-197.41	-394.82	-197.41	-197.41	-197.41	-197.41	-394.821	-197.41	-197.41	-197.41	-197.41	-394.821	-197.41	-197.41	-197.41	-197.41	-394.82	-197.41	-197.41	-197.41	-197.41	-394.821	-197.41	-197.41	-197.41	-197.41	-394.821	-197.41	-197.41	-197.41	-197.41	-394.821	-197.41	-197.41	-197.41	-197.41	-394.821	-197.41	-197.41	-197.41	-197.41	-394.821	-197.41	-197.41	-197.41
37_Cyclopentane-Neopentane_0.90_dimer.out	-393.609	-196.195	-197.41	-197.411	-196.196	-393.607	-196.195	-197.41	-197.41	-196.195	-393.608	-196.195	-197.41	-197.411	-196.195	-393.608	-196.195	-197.41	-197.411	-196.196	-393.607	-196.195	-197.41	-197.411	-196.195	-393.609	-196.195	-197.41	-197.411	-196.196	-393.609	-196.195	-197.41	-197.411	-196.196	-393.608	-196.195	-197.41	-197.411	-196.196	-393.609	-196.195	-197.41	-197.411	-196.196	-393.609	-196.195	-197.41	-197.411
37_Cyclopentane-Neopentane_0.95_dimer.out	-393.61	-196.195	-197.41	-197.411	-196.196	-393.608	-196.195	-197.41	-197.41	-196.195	-393.609	-196.195	-197.41	-197.41	-196.195	-393.609	-196.195	-197.41	-197.411	-196.196	-393.608	-196.195	-197.41	-197.41	-196.195	-393.61	-196.195	-197.41	-197.411	-196.196	-393.61	-196.195	-197.41	-197.411	-196.196	-393.61	-196.195	-197.41	-197.411	-196.196	-393.61	-196.195	-197.41	-197.411	-196.196	-393.61	-196.195	-197.41	-197.411
37_Cyclopentane-Neopentane_1.00_dimer.out	-393.61	-196.195	-197.41	-197.411	-196.196	-393.608	-196.195	-197.41	-197.41	-196.195	-393.609	-196.195	-197.41	-197.41	-196.195	-393.609	-196.195	-197.41	-197.411	-196.195	-393.609	-196.195	-197.41	-197.41	-196.195	-393.61	-196.195	-197.41	-197.411	-196.196	-393.61	-196.195	-197.41	-197.411	-196.195	-393.61	-196.195	-197.41	-197.411	-196.195	-393.61	-196.195	-197.41	-197.411	-196.196	-393.61	-196.195	-197.41	-197.411
37_Cyclopentane-Neopentane_1.05_dimer.out	-393.61	-196.195	-197.41	-197.411	-196.196	-393.608	-196.195	-197.41	-197.41	-196.195	-393.609	-196.195	-197.41	-197.41	-196.195	-393.609	-196.195	-197.41	-197.411	-196.195	-393.609	-196.195	-197.41	-197.41	-196.195	-393.61	-196.195	-197.41	-197.411	-196.196	-393.61	-196.195	-197.41	-197.41	-196.195	-393.61	-196.195	-197.41	-197.411	-196.195	-393.61	-196.195	-197.41	-197.411	-196.196	-393.61	-196.195	-197.41	-197.411
37_Cyclopentane-Neopentane_1.10_dimer.out	-393.61	-196.195	-197.41	-197.411	-196.196	-393.608	-196.195	-197.41	-197.41	-196.195	-393.609	-196.195	-197.41	-197.41	-196.195	-393.609	-196.195	-197.41	-197.411	-196.195	-393.608	-196.195	-197.41	-197.41	-196.195	-393.609	-196.195	-197.41	-197.411	-196.196	-393.609	-196.195	-197.41	-197.41	-196.195	-393.609	-196.195	-197.41	-197.41	-196.195	-393.609	-196.195	-197.41	-197.411	-196.196	-393.609	-196.195	-197.41	-197.411
37_Cyclopentane-Neopentane_1.25_dimer.out	-393.608	-196.195	-197.41	-197.411	-196.196	-393.607	-196.195	-197.41	-197.41	-196.195	-393.608	-196.195	-197.41	-197.41	-196.195	-393.608	-196.195	-197.41	-197.41	-196.195	-393.607	-196.195	-197.41	-197.41	-196.195	-393.608	-196.195	-197.41	-197.411	-196.196	-393.608	-196.195	-197.41	-197.41	-196.195	-393.608	-196.195	-197.41	-197.41	-196.195	-393.608	-196.195	-197.41	-197.41	-196.195	-393.608	-196.195	-197.41	-197.411
37_Cyclopentane-Neopentane_1.50_dimer.out	-393.607	-196.195	-197.41	-197.411	-196.195	-393.606	-196.195	-197.41	-197.41	-196.195	-393.606	-196.195	-197.41	-197.41	-196.195	-393.607	-196.195	-197.41	-197.41	-196.195	-393.606	-196.195	-197.41	-197.41	-196.195	-393.607	-196.195	-197.41	-197.411	-196.195	-393.607	-196.195	-197.41	-197.41	-196.195	-393.607	-196.195	-197.41	-197.41	-196.195	-393.607	-196.195	-197.41	-197.41	-196.195	-393.607	-196.195	-197.41	-197.41
37_Cyclopentane-Neopentane_2.00_dimer.out	-393.606	-196.195	-197.41	-197.41	-196.195	-393.605	-196.195	-197.41	-197.41	-196.195	-393.606	-196.195	-197.41	-197.41	-196.195	-393.606	-196.195	-197.41	-197.41	-196.195	-393.605	-196.195	-197.41	-197.41	-196.195	-393.606	-196.195	-197.41	-197.41	-196.195	-393.606	-196.195	-197.41	-197.41	-196.195	-393.606	-196.195	-197.41	-197.41	-196.195	-393.606	-196.195	-197.41	-197.41	-196.195	-393.606	-196.195	-197.41	-197.41
38_Cyclopentane-Cyclopentane_0.90_dimer.out	-392.395	-196.195	-196.195	-196.196	-196.196	-392.393	-196.195	-196.195	-196.195	-196.195	-392.394	-196.195	-196.195	-196.196	-196.196	-392.394	-196.195	-196.195	-196.196	-196.196	-392.393	-196.195	-196.195	-196.195	-196.195	-392.395	-196.195	-196.195	-196.196	-196.196	-392.395	-196.195	-196.195	-196.196	-196.196	-392.395	-196.195	-196.195	-196.196	-196.196	-392.395	-196.195	-196.195	-196.196	-196.196	-392.395	-196.195	-196.195	-196.196
38_Cyclopentane-Cyclopentane_0.95_dimer.out	-392.396	-196.195	-196.195	-196.196	-196.196	-392.394	-196.195	-196.195	-196.195	-196.195	-392.395	-196.195	-196.195	-196.195	-196.195	-392.395	-196.195	-196.195	-196.196	-196.196	-392.394	-196.195	-196.195	-196.195	-196.195	-392.396	-196.195	-196.195	-196.196	-196.196	-392.396	-196.195	-196.195	-196.196	-196.196	-392.396	-196.195	-196.195	-196.196	-196.196	-392.396	-196.195	-196.195	-196.196	-196.196	-392.396	-196.195	-196.195	-196.196
38_Cyclopentane-Cyclopentane_1.00_dimer.out	-392.396	-196.195	-196.195	-196.196	-196.196	-392.394	-196.195	-196.195	-196.195	-196.195	-392.395	-196.195	-196.195	-196.195	-196.195	-392.395	-196.195	-196.195	-196.196	-196.196	-392.395	-196.195	-196.195	-196.195	-196.195	-392.396	-196.195	-196.195	-196.196	-196.196	-392.396	-196.195	-196.195	-196.196	-196.196	-392.396	-196.195	-196.195	-196.196	-196.196	-392.396	-196.195	-196.195	-196.196	-196.196	-392.396	-196.195	-196.195	-196.196
38_Cyclopentane-Cyclopentane_1.05_dimer.out	-392.396	-196.195	-196.195	-196.196	-196.196	-392.394	-196.195	-196.195	-196.195	-196.195	-392.395	-196.195	-196.195	-196.195	-196.195	-392.395	-196.195	-196.195	-196.195	-196.196	-392.394	-196.195	-196.195	-196.195	-196.195	-392.396	-196.195	-196.195	-196.196	-196.196	-392.396	-196.195	-196.195	-196.196	-196.196	-392.396	-196.195	-196.195	-196.196	-196.196	-392.396	-196.195	-196.195	-196.196	-196.196	-392.396	-196.195	-196.195	-196.196
38_Cyclopentane-Cyclopentane_1.10_dimer.out	-392.395	-196.195	-196.195	-196.196	-196.196	-392.394	-196.195	-196.195	-196.195	-196.195	-392.394	-196.195	-196.195	-196.195	-196.195	-392.395	-196.195	-196.195	-196.195	-196.195	-392.394	-196.195	-196.195	-196.195	-196.195	-392.395	-196.195	-196.195	-196.196	-196.196	-392.395	-196.195	-196.195	-196.196	-196.195	-392.395	-196.195	-196.195	-196.196	-196.196	-392.395	-196.195	-196.195	-196.196	-196.196	-392.395	-196.195	-196.195	-196.196
38_Cyclopentane-Cyclopentane_1.25_dimer.out	-392.394	-196.195	-196.195	-196.196	-196.196	-392.393	-196.195	-196.195	-196.195	-196.195	-392.393	-196.195	-196.195	-196.195	-196.195	-392.393	-196.195	-196.195	-196.195	-196.195	-392.393	-196.195	-196.195	-196.195	-196.195	-392.394	-196.195	-196.195	-196.196	-196.196	-392.394	-196.195	-196.195	-196.195	-196.195	-392.394	-196.195	-196.195	-196.195	-196.195	-392.394	-196.195	-196.195	-196.195	-196.195	-392.394	-196.195	-196.195	-196.195
38_Cyclopentane-Cyclopentane_1.50_dimer.out	-392.392	-196.195	-196.195	-196.195	-196.195	-392.391	-196.195	-196.195	-196.195	-196.195	-392.391	-196.195	-196.195	-196.195	-196.195	-392.392	-196.195	-196.195	-196.195	-196.195	-392.391	-196.195	-196.195	-196.195	-196.195	-392.392	-196.195	-196.195	-196.195	-196.195	-392.392	-196.195	-196.195	-196.195	-196.195	-392.392	-196.195	-196.195	-196.195	-196.195	-392.392	-196.195	-196.195	-196.195	-196.195	-392.392	-196.195	-196.195	-196.195
38_Cyclopentane-Cyclopentane_2.00_dimer.out	-392.391	-196.195	-196.195	-196.195	-196.195	-392.39	-196.195	-196.195	-196.195	-196.195	-392.39	-196.195	-196.195	-196.195	-196.195	-392.39	-196.195	-196.195	-196.195	-196.195	-392.39	-196.195	-196.195	-196.195	-196.195	-392.391	-196.195	-196.195	-196.195	-196.195	-392.391	-196.195	-196.195	-196.195	-196.195	-392.391	-196.195	-196.195	-196.195	-196.195	-392.391	-196.195	-196.195	-196.195	-196.195	-392.391	-196.195	-196.195	-196.195
39_Benzene-Cyclopentane_0.90_dimer.out	-428.019	-231.819	-196.195	-196.196	-231.82	-428.016	-231.818	-196.195	-196.195	-231.819	-428.017	-231.818	-196.195	-196.196	-231.819	-428.018	-231.818	-196.195	-196.196	-231.82	-428.017	-231.818	-196.195	-196.196	-231.82	-428.018	-231.819	-196.195	-196.196	-231.82	-428.019	-231.819	-196.195	-196.196	-231.82	-428.019	-231.819	-196.195	-196.196	-231.82	-428.019	-231.819	-196.195	-196.196	-231.82	-428.019	-231.819	-196.195	-196.196
39_Benzene-Cyclopentane_0.95_dimer.out	-428.02	-231.819	-196.195	-196.196	-231.82	-428.018	-231.818	-196.195	-196.195	-231.819	-428.019	-231.818	-196.195	-196.196	-231.819	-428.019	-231.818	-196.195	-196.196	-231.819	-428.019	-231.818	-196.195	-196.196	-231.819	-428.02	-231.819	-196.195	-196.196	-231.82	-428.021	-231.819	-196.195	-196.196	-231.82	-428.02	-231.819	-196.195	-196.196	-231.82	-428.02	-231.819	-196.195	-196.196	-231.82	-428.02	-231.819	-196.195	-196.196
39_Benzene-Cyclopentane_1.00_dimer.out	-428.021	-231.819	-196.195	-196.196	-231.82	-428.018	-231.818	-196.195	-196.195	-231.818	-428.019	-231.818	-196.195	-196.195	-231.819	-428.02	-231.818	-196.195	-196.196	-231.819	-428.019	-231.818	-196.195	-196.195	-231.819	-428.02	-231.819	-196.195	-196.196	-231.82	-428.021	-231.819	-196.195	-196.196	-231.82	-428.021	-231.819	-196.195	-196.196	-231.82	-428.021	-231.819	-196.195	-196.196	-231.82	-428.021	-231.819	-196.195	-196.196
39_Benzene-Cyclopentane_1.05_dimer.out	-428.02	-231.819	-196.195	-196.196	-231.819	-428.018	-231.818	-196.195	-196.195	-231.818	-428.019	-231.818	-196.195	-196.195	-231.819	-428.02	-231.818	-196.195	-196.196	-231.819	-428.019	-231.818	-196.195	-196.195	-231.819	-428.02	-231.819	-196.195	-196.196	-231.819	-428.021	-231.819	-196.195	-196.196	-231.819	-428.021	-231.819	-196.195	-196.196	-231.82	-428.021	-231.819	-196.195	-196.196	-231.82	-428.02	-231.819	-196.195	-196.196
39_Benzene-Cyclopentane_1.10_dimer.out	-428.02	-231.819	-196.195	-196.196	-231.819	-428.018	-231.818	-196.195	-196.195	-231.818	-428.018	-231.818	-196.195	-196.195	-231.819	-428.019	-231.818	-196.195	-196.195	-231.819	-428.019	-231.818	-196.195	-196.195	-231.819	-428.02	-231.819	-196.195	-196.196	-231.819	-428.02	-231.819	-196.195	-196.196	-231.819	-428.02	-231.819	-196.195	-196.196	-231.819	-428.02	-231.819	-196.195	-196.196	-231.819	-428.02	-231.819	-196.195	-196.196
39_Benzene-Cyclopentane_1.25_dimer.out	-428.018	-231.819	-196.195	-196.196	-231.819	-428.016	-231.818	-196.195	-196.195	-231.818	-428.017	-231.818	-196.195	-196.195	-231.818	-428.017	-231.818	-196.195	-196.195	-231.819	-428.017	-231.818	-196.195	-196.195	-231.819	-428.018	-231.819	-196.195	-196.196	-231.819	-428.018	-231.819	-196.195	-196.195	-231.819	-428.018	-231.819	-196.195	-196.195	-231.819	-428.018	-231.819	-196.195	-196.195	-231.819	-428.018	-231.819	-196.195	-196.196
39_Benzene-Cyclopentane_1.50_dimer.out	-428.016	-231.819	-196.195	-196.195	-231.819	-428.014	-231.818	-196.195	-196.195	-231.818	-428.015	-231.818	-196.195	-196.195	-231.818	-428.015	-231.818	-196.195	-196.195	-231.818	-428.015	-231.818	-196.195	-196.195	-231.818	-428.016	-231.819	-196.195	-196.195	-231.819	-428.016	-231.819	-196.195	-196.195	-231.819	-428.016	-231.819	-196.195	-196.195	-231.819	-428.016	-231.819	-196.195	-196.195	-231.819	-428.016	-231.819	-196.195	-196.195
39_Benzene-Cyclopentane_2.00_dimer.out	-428.014	-231.819	-196.195	-196.195	-231.819	-428.013	-231.818	-196.195	-196.195	-231.818	-428.013	-231.818	-196.195	-196.195	-231.818	-428.014	-231.818	-196.195	-196.195	-231.818	-428.013	-231.818	-196.195	-196.195	-231.818	-428.014	-231.819	-196.195	-196.195	-231.819	-428.014	-231.819	-196.195	-196.195	-231.819	-428.014	-231.819	-196.195	-196.195	-231.819	-428.014	-231.819	-196.195	-196.195	-231.819	-428.014	-231.819	-196.195	-196.195
40_Benzene-Neopentane_0.90_dimer.out	-429.233	-231.819	-197.41	-197.411	-231.82	-429.23	-231.818	-197.41	-197.41	-231.819	-429.232	-231.818	-197.41	-197.411	-231.819	-429.232	-231.818	-197.41	-197.411	-231.819	-429.232	-231.818	-197.41	-197.411	-231.819	-429.233	-231.819	-197.41	-197.411	-231.82	-429.233	-231.819	-197.41	-197.411	-231.82	-429.233	-231.819	-197.41	-197.411	-231.82	-429.233	-231.819	-197.41	-197.411	-231.82	-429.233	-231.819	-197.41	-197.411
40_Benzene-Neopentane_0.95_dimer.out	-429.234	-231.819	-197.41	-197.411	-231.82	-429.232	-231.818	-197.41	-197.41	-231.818	-429.233	-231.818	-197.41	-197.41	-231.819	-429.233	-231.818	-197.41	-197.411	-231.819	-429.233	-231.818	-197.41	-197.41	-231.819	-429.234	-231.819	-197.41	-197.411	-231.82	-429.234	-231.819	-197.41	-197.411	-231.82	-429.234	-231.819	-197.41	-197.411	-231.82	-429.234	-231.819	-197.41	-197.411	-231.82	-429.234	-231.819	-197.41	-197.411
40_Benzene-Neopentane_1.00_dimer.out	-429.234	-231.819	-197.41	-197.411	-231.819	-429.232	-231.818	-197.41	-197.41	-231.818	-429.233	-231.818	-197.41	-197.41	-231.819	-429.234	-231.818	-197.41	-197.411	-231.819	-429.233	-231.818	-197.41	-197.41	-231.819	-429.234	-231.819	-197.41	-197.411	-231.819	-429.235	-231.819	-197.41	-197.411	-231.819	-429.235	-231.819	-197.41	-197.411	-231.82	-429.235	-231.819	-197.41	-197.411	-231.82	-429.234	-231.819	-197.41	-197.411
40_Benzene-Neopentane_1.05_dimer.out	-429.234	-231.819	-197.41	-197.411	-231.819	-429.232	-231.818	-197.41	-197.41	-231.818	-429.233	-231.818	-197.41	-197.41	-231.819	-429.234	-231.818	-197.41	-197.411	-231.819	-429.233	-231.818	-197.41	-197.41	-231.819	-429.234	-231.819	-197.41	-197.411	-231.819	-429.235	-231.819	-197.41	-197.411	-231.819	-429.234	-231.819	-197.41	-197.411	-231.819	-429.234	-231.819	-197.41	-197.411	-231.819	-429.234	-231.819	-197.41	-197.411
40_Benzene-Neopentane_1.10_dimer.out	-429.234	-231.819	-197.41	-197.411	-231.819	-429.232	-231.818	-197.41	-197.41	-231.818	-429.233	-231.818	-197.41	-197.41	-231.819	-429.233	-231.818	-197.41	-197.411	-231.819	-429.233	-231.818	-197.41	-197.41	-231.819	-429.234	-231.819	-197.41	-197.411	-231.819	-429.234	-231.819	-197.41	-197.41	-231.819	-429.234	-231.819	-197.41	-197.411	-231.819	-429.234	-231.819	-197.41	-197.411	-231.819	-429.234	-231.819	-197.41	-197.411
40_Benzene-Neopentane_1.25_dimer.out	-429.232	-231.819	-197.41	-197.411	-231.819	-429.231	-231.818	-197.41	-197.41	-231.818	-429.231	-231.818	-197.41	-197.41	-231.818	-429.232	-231.818	-197.41	-197.41	-231.819	-429.231	-231.818	-197.41	-197.41	-231.819	-429.232	-231.819	-197.41	-197.411	-231.819	-429.232	-231.819	-197.41	-197.41	-231.819	-429.232	-231.819	-197.41	-197.41	-231.819	-429.232	-231.819	-197.41	-197.41	-231.819	-429.232	-231.819	-197.41	-197.411
40_Benzene-Neopentane_1.50_dimer.out	-429.23	-231.819	-197.41	-197.411	-231.819	-429.229	-231.818	-197.41	-197.41	-231.818	-429.23	-231.818	-197.41	-197.41	-231.818	-429.23	-231.818	-197.41	-197.41	-231.818	-429.23	-231.818	-197.41	-197.41	-231.818	-429.23	-231.819	-197.41	-197.411	-231.819	-429.23	-231.819	-197.41	-197.41	-231.819	-429.231	-231.819	-197.41	-197.41	-231.819	-429.231	-231.819	-197.41	-197.41	-231.819	-429.231	-231.819	-197.41	-197.41
40_Benzene-Neopentane_2.00_dimer.out	-429.229	-231.819	-197.41	-197.41	-231.819	-429.228	-231.818	-197.41	-197.41	-231.818	-429.229	-231.818	-197.41	-197.41	-231.818	-429.229	-231.818	-197.41	-197.41	-231.818	-429.229	-231.818	-197.41	-197.41	-231.818	-429.229	-231.819	-197.41	-197.41	-231.819	-429.229	-231.819	-197.41	-197.41	-231.819	-429.229	-231.819	-197.41	-197.41	-231.819	-429.23	-231.819	-197.41	-197.41	-231.819	-429.229	-231.819	-197.41	-197.41
41_Uracil-Pentane_0.90_dimer.out	-611.618	-414.206	-197.404	-197.405	-414.208	-611.614	-414.205	-197.403	-197.404	-414.206	-611.616	-414.206	-197.404	-197.405	-414.207	-611.616	-414.205	-197.404	-197.405	-414.207	-611.614	-414.203	-197.404	-197.405	-414.205	-611.617	-414.206	-197.404	-197.405	-414.208	-611.617	-414.205	-197.404	-197.405	-414.207	-611.617	-414.206	-197.404	-197.405	-414.207	-611.618	-414.206	-197.404	-197.405	-414.208	-611.618	-414.206	-197.404	-197.405
41_Uracil-Pentane_0.95_dimer.out	-611.619	-414.206	-197.404	-197.405	-414.208	-611.615	-414.205	-197.403	-197.404	-414.205	-611.617	-414.206	-197.404	-197.404	-414.207	-611.618	-414.205	-197.404	-197.405	-414.207	-611.615	-414.203	-197.404	-197.405	-414.205	-611.619	-414.206	-197.404	-197.405	-414.208	-611.618	-414.205	-197.404	-197.404	-414.206	-611.619	-414.206	-197.404	-197.404	-414.207	-611.619	-414.206	-197.404	-197.405	-414.207	-611.619	-414.206	-197.404	-197.405
41_Uracil-Pentane_1.00_dimer.out	-611.619	-414.206	-197.404	-197.405	-414.208	-611.616	-414.205	-197.403	-197.404	-414.205	-611.618	-414.206	-197.404	-197.404	-414.207	-611.618	-414.205	-197.404	-197.405	-414.206	-611.615	-414.203	-197.404	-197.404	-414.204	-611.619	-414.206	-197.404	-197.405	-414.207	-611.618	-414.205	-197.404	-197.404	-414.206	-611.619	-414.206	-197.404	-197.404	-414.207	-611.619	-414.206	-197.404	-197.405	-414.207	-611.619	-414.206	-197.404	-197.405
41_Uracil-Pentane_1.05_dimer.out	-611.619	-414.206	-197.404	-197.405	-414.207	-611.615	-414.205	-197.403	-197.404	-414.205	-611.617	-414.206	-197.404	-197.404	-414.206	-611.617	-414.205	-197.404	-197.404	-414.206	-611.615	-414.203	-197.404	-197.404	-414.204	-611.618	-414.206	-197.404	-197.405	-414.207	-611.618	-414.205	-197.404	-197.404	-414.206	-611.618	-414.206	-197.404	-197.404	-414.207	-611.619	-414.206	-197.404	-197.404	-414.207	-611.619	-414.206	-197.404	-197.404
41_Uracil-Pentane_1.10_dimer.out	-611.618	-414.206	-197.404	-197.404	-414.207	-611.615	-414.205	-197.403	-197.404	-414.205	-611.616	-414.206	-197.404	-197.404	-414.206	-611.617	-414.205	-197.404	-197.404	-414.206	-611.614	-414.203	-197.404	-197.404	-414.204	-611.617	-414.206	-197.404	-197.404	-414.207	-611.617	-414.205	-197.404	-197.404	-414.206	-611.617	-414.206	-197.404	-197.404	-414.207	-611.618	-414.206	-197.404	-197.404	-414.207	-611.618	-414.206	-197.404	-197.404
41_Uracil-Pentane_1.25_dimer.out	-611.615	-414.206	-197.404	-197.404	-414.207	-611.612	-414.205	-197.403	-197.404	-414.205	-611.613	-414.206	-197.404	-197.404	-414.206	-611.614	-414.205	-197.404	-197.404	-414.206	-611.611	-414.203	-197.404	-197.404	-414.204	-611.614	-414.206	-197.404	-197.404	-414.207	-611.614	-414.205	-197.404	-197.404	-414.206	-611.614	-414.206	-197.404	-197.404	-414.206	-611.615	-414.206	-197.404	-197.404	-414.207	-611.615	-414.206	-197.404	-197.404
41_Uracil-Pentane_1.50_dimer.out	-611.612	-414.206	-197.404	-197.404	-414.207	-611.61	-414.205	-197.403	-197.404	-414.205	-611.611	-414.206	-197.404	-197.404	-414.206	-611.611	-414.205	-197.404	-197.404	-414.206	-611.609	-414.203	-197.404	-197.404	-414.204	-611.612	-414.206	-197.404	-197.404	-414.206	-611.611	-414.205	-197.404	-197.404	-414.205	-611.612	-414.206	-197.404	-197.404	-414.206	-611.612	-414.206	-197.404	-197.404	-414.206	-611.612	-414.206	-197.404	-197.404
41_Uracil-Pentane_2.00_dimer.out	-611.611	-414.206	-197.404	-197.404	-414.206	-611.609	-414.205	-197.403	-197.403	-414.205	-611.61	-414.206	-197.404	-197.404	-414.206	-611.609	-414.205	-197.404	-197.404	-414.205	-611.607	-414.203	-197.404	-197.404	-414.203	-611.611	-414.206	-197.404	-197.404	-414.206	-611.609	-414.205	-197.404	-197.404	-414.205	-611.61	-414.206	-197.404	-197.404	-414.206	-611.61	-414.206	-197.404	-197.404	-414.206	-611.611	-414.206	-197.404	-197.404
42_Uracil-Cyclopentane_0.90_dimer.out	-610.408	-414.206	-196.195	-196.196	-414.208	-610.404	-414.205	-196.195	-196.195	-414.206	-610.407	-414.206	-196.195	-196.196	-414.207	-610.406	-414.205	-196.195	-196.196	-414.207	-610.404	-414.203	-196.195	-196.196	-414.205	-610.408	-414.206	-196.195	-196.196	-414.208	-610.407	-414.205	-196.195	-196.196	-414.207	-610.408	-414.206	-196.195	-196.196	-414.207	-610.408	-414.206	-196.195	-196.196	-414.208	-610.408	-414.206	-196.195	-196.196
42_Uracil-Cyclopentane_0.95_dimer.out	-610.41	-414.206	-196.195	-196.196	-414.208	-610.406	-414.205	-196.195	-196.195	-414.205	-610.408	-414.206	-196.195	-196.196	-414.207	-610.408	-414.205	-196.195	-196.196	-414.207	-610.405	-414.203	-196.195	-196.196	-414.205	-610.409	-414.206	-196.195	-196.196	-414.208	-610.409	-414.205	-196.195	-196.196	-414.206	-610.409	-414.206	-196.195	-196.196	-414.207	-610.409	-414.206	-196.195	-196.196	-414.207	-610.409	-414.206	-196.195	-196.196
42_Uracil-Cyclopentane_1.00_dimer.out	-610.41	-414.206	-196.195	-196.196	-414.208	-610.406	-414.205	-196.195	-196.195	-414.205	-610.408	-414.206	-196.195	-196.195	-414.206	-610.408	-414.205	-196.195	-196.196	-414.206	-610.405	-414.203	-196.195	-196.196	-414.204	-610.409	-414.206	-196.195	-196.196	-414.207	-610.409	-414.205	-196.195	-196.196	-414.206	-610.409	-414.206	-196.195	-196.196	-414.207	-610.409	-414.206	-196.195	-196.196	-414.207	-610.41	-414.206	-196.195	-196.196
42_Uracil-Cyclopentane_1.05_dimer.out	-610.409	-414.206	-196.195	-196.196	-414.207	-610.406	-414.205	-196.195	-196.195	-414.205	-610.407	-414.206	-196.195	-196.195	-414.206	-610.408	-414.205	-196.195	-196.196	-414.206	-610.405	-414.203	-196.195	-196.195	-414.204	-610.409	-414.206	-196.195	-196.196	-414.207	-610.408	-414.205	-196.195	-196.196	-414.206	-610.409	-414.206	-196.195	-196.196	-414.207	-610.409	-414.206	-196.195	-196.196	-414.207	-610.409	-414.206	-196.195	-196.196
42_Uracil-Cyclopentane_1.10_dimer.out	-610.408	-414.206	-196.195	-196.196	-414.207	-610.405	-414.205	-196.195	-196.195	-414.205	-610.407	-414.206	-196.195	-196.195	-414.206	-610.407	-414.205	-196.195	-196.196	-414.206	-610.404	-414.203	-196.195	-196.195	-414.204	-610.408	-414.206	-196.195	-196.196	-414.207	-610.407	-414.205	-196.195	-196.196	-414.206	-610.408	-414.206	-196.195	-196.196	-414.207	-610.408	-414.206	-196.195	-196.196	-414.207	-610.408	-414.206	-196.195	-196.196
42_Uracil-Cyclopentane_1.25_dimer.out	-610.406	-414.206	-196.195	-196.196	-414.207	-610.403	-414.205	-196.195	-196.195	-414.205	-610.405	-414.206	-196.195	-196.195	-414.206	-610.405	-414.205	-196.195	-196.195	-414.206	-610.402	-414.203	-196.195	-196.195	-414.204	-610.406	-414.206	-196.195	-196.196	-414.207	-610.405	-414.205	-196.195	-196.195	-414.206	-610.406	-414.206	-196.195	-196.195	-414.206	-610.406	-414.206	-196.195	-196.196	-414.207	-610.406	-414.206	-196.195	-196.196
42_Uracil-Cyclopentane_1.50_dimer.out	-610.404	-414.206	-196.195	-196.195	-414.207	-610.401	-414.205	-196.195	-196.195	-414.205	-610.402	-414.206	-196.195	-196.195	-414.206	-610.402	-414.205	-196.195	-196.195	-414.206	-610.4	-414.203	-196.195	-196.195	-414.204	-610.403	-414.206	-196.195	-196.195	-414.206	-610.402	-414.205	-196.195	-196.195	-414.205	-610.403	-414.206	-196.195	-196.195	-414.206	-610.404	-414.206	-196.195	-196.195	-414.206	-610.404	-414.206	-196.195	-196.195
42_Uracil-Cyclopentane_2.00_dimer.out	-610.402	-414.206	-196.195	-196.195	-414.206	-610.4	-414.205	-196.195	-196.195	-414.205	-610.401	-414.206	-196.195	-196.195	-414.206	-610.401	-414.205	-196.195	-196.195	-414.205	-610.399	-414.203	-196.195	-196.195	-414.203	-610.402	-414.206	-196.195	-196.195	-414.206	-610.401	-414.205	-196.195	-196.195	-414.205	-610.401	-414.206	-196.195	-196.195	-414.206	-610.402	-414.206	-196.195	-196.195	-414.206	-610.402	-414.206	-196.195	-196.195
43_Uracil-Neopentane_0.90_dimer.out	-611.623	-414.206	-197.41	-197.411	-414.208	-611.619	-414.205	-197.41	-197.41	-414.205	-611.621	-414.206	-197.41	-197.411	-414.207	-611.621	-414.205	-197.41	-197.411	-414.207	-611.618	-414.203	-197.41	-197.411	-414.205	-611.622	-414.206	-197.41	-197.411	-414.207	-611.621	-414.205	-197.41	-197.411	-414.206	-611.622	-414.206	-197.41	-197.411	-414.207	-611.622	-414.206	-197.41	-197.411	-414.207	-611.622	-414.206	-197.41	-197.411
43_Uracil-Neopentane_0.95_dimer.out	-611.624	-414.206	-197.41	-197.411	-414.207	-611.62	-414.205	-197.41	-197.41	-414.205	-611.622	-414.206	-197.41	-197.411	-414.206	-611.622	-414.205	-197.41	-197.411	-414.206	-611.619	-414.203	-197.41	-197.411	-414.204	-611.623	-414.206	-197.41	-197.411	-414.207	-611.622	-414.205	-197.41	-197.411	-414.206	-611.623	-414.206	-197.41	-197.411	-414.207	-611.623	-414.206	-197.41	-197.411	-414.207	-611.624	-414.206	-197.41	-197.411
43_Uracil-Neopentane_1.00_dimer.out	-611.624	-414.206	-197.41	-197.411	-414.207	-611.62	-414.205	-197.41	-197.41	-414.205	-611.622	-414.206	-197.41	-197.41	-414.206	-611.622	-414.205	-197.41	-197.411	-414.206	-611.62	-414.203	-197.41	-197.41	-414.204	-611.623	-414.206	-197.41	-197.411	-414.207	-611.622	-414.205	-197.41	-197.411	-414.206	-611.623	-414.206	-197.41	-197.411	-414.207	-611.623	-414.206	-197.41	-197.411	-414.207	-611.624	-414.206	-197.41	-197.411
43_Uracil-Neopentane_1.05_dimer.out	-611.623	-414.206	-197.41	-197.411	-414.207	-611.62	-414.205	-197.41	-197.41	-414.205	-611.622	-414.206	-197.41	-197.41	-414.206	-611.622	-414.205	-197.41	-197.411	-414.206	-611.619	-414.203	-197.41	-197.41	-414.204	-611.623	-414.206	-197.41	-197.411	-414.207	-611.622	-414.205	-197.41	-197.411	-414.206	-611.623	-414.206	-197.41	-197.411	-414.206	-611.623	-414.206	-197.41	-197.411	-414.207	-611.623	-414.206	-197.41	-197.411
43_Uracil-Neopentane_1.10_dimer.out	-611.623	-414.206	-197.41	-197.411	-414.207	-611.62	-414.205	-197.41	-197.41	-414.205	-611.621	-414.206	-197.41	-197.41	-414.206	-611.621	-414.205	-197.41	-197.411	-414.206	-611.619	-414.203	-197.41	-197.41	-414.204	-611.622	-414.206	-197.41	-197.411	-414.207	-611.621	-414.205	-197.41	-197.411	-414.206	-611.622	-414.206	-197.41	-197.411	-414.206	-611.622	-414.206	-197.41	-197.411	-414.207	-611.622	-414.206	-197.41	-197.411
43_Uracil-Neopentane_1.25_dimer.out	-611.621	-414.206	-197.41	-197.411	-414.207	-611.618	-414.205	-197.41	-197.41	-414.205	-611.619	-414.206	-197.41	-197.41	-414.206	-611.619	-414.205	-197.41	-197.41	-414.206	-611.617	-414.203	-197.41	-197.41	-414.204	-611.62	-414.206	-197.41	-197.411	-414.207	-611.619	-414.205	-197.41	-197.41	-414.205	-611.62	-414.206	-197.41	-197.41	-414.206	-611.62	-414.206	-197.41	-197.411	-414.206	-611.62	-414.206	-197.41	-197.411
43_Uracil-Neopentane_1.50_dimer.out	-611.618	-414.206	-197.41	-197.411	-414.207	-611.616	-414.205	-197.41	-197.41	-414.205	-611.617	-414.206	-197.41	-197.41	-414.206	-611.617	-414.205	-197.41	-197.41	-414.205	-611.615	-414.203	-197.41	-197.41	-414.203	-611.618	-414.206	-197.41	-197.411	-414.206	-611.617	-414.205	-197.41	-197.41	-414.205	-611.618	-414.206	-197.41	-197.41	-414.206	-611.618	-414.206	-197.41	-197.41	-414.206	-611.618	-414.206	-197.41	-197.41
43_Uracil-Neopentane_2.00_dimer.out	-611.617	-414.206	-197.41	-197.41	-414.206	-611.615	-414.205	-197.41	-197.41	-414.205	-611.616	-414.206	-197.41	-197.41	-414.206	-611.616	-414.205	-197.41	-197.41	-414.205	-611.614	-414.203	-197.41	-197.41	-414.203	-611.617	-414.206	-197.41	-197.41	-414.206	-611.616	-414.205	-197.41	-197.41	-414.205	-611.616	-414.206	-197.41	-197.41	-414.206	-611.617	-414.206	-197.41	-197.41	-414.206	-611.617	-414.206	-197.41	-197.41
44_Ethene-Pentane_0.90_dimer.out	-275.849	-78.4427	-197.404	-197.404	-78.4431	-275.848	-78.4427	-197.404	-197.404	-78.4429	-275.849	-78.4426	-197.404	-197.404	-78.4429	-275.849	-78.4427	-197.404	-197.404	-78.4431	-275.849	-78.4427	-197.404	-197.404	-78.4432	-275.849	-78.4427	-197.404	-197.404	-78.4431	-275.849	-78.4428	-197.404	-197.404	-78.4431	-275.849	-78.4427	-197.404	-197.404	-78.443	-275.849	-78.4427	-197.404	-197.404	-78.443	-275.849	-78.4427	-197.404	-197.404
44_Ethene-Pentane_0.95_dimer.out	-275.85	-78.4427	-197.404	-197.404	-78.443	-275.849	-78.4427	-197.404	-197.404	-78.4428	-275.849	-78.4426	-197.404	-197.404	-78.4428	-275.85	-78.4427	-197.404	-197.404	-78.443	-275.849	-78.4427	-197.404	-197.404	-78.4431	-275.85	-78.4427	-197.404	-197.404	-78.443	-275.85	-78.4428	-197.404	-197.404	-78.443	-275.85	-78.4427	-197.404	-197.404	-78.443	-275.85	-78.4427	-197.404	-197.404	-78.443	-275.85	-78.4427	-197.404	-197.404
44_Ethene-Pentane_1.00_dimer.out	-275.85	-78.4427	-197.404	-197.404	-78.443	-275.849	-78.4427	-197.404	-197.404	-78.4428	-275.849	-78.4426	-197.404	-197.404	-78.4428	-275.85	-78.4427	-197.404	-197.404	-78.4429	-275.85	-78.4427	-197.404	-197.404	-78.443	-275.85	-78.4427	-197.404	-197.404	-78.443	-275.85	-78.4428	-197.404	-197.404	-78.443	-275.85	-78.4427	-197.404	-197.404	-78.4429	-275.85	-78.4427	-197.404	-197.404	-78.4429	-275.85	-78.4427	-197.404	-197.404
44_Ethene-Pentane_1.05_dimer.out	-275.85	-78.4427	-197.404	-197.404	-78.4429	-275.849	-78.4427	-197.404	-197.404	-78.4428	-275.849	-78.4426	-197.404	-197.404	-78.4428	-275.849	-78.4427	-197.404	-197.404	-78.4429	-275.849	-78.4427	-197.404	-197.404	-78.443	-275.85	-78.4427	-197.404	-197.404	-78.4429	-275.85	-78.4428	-197.404	-197.404	-78.4429	-275.85	-78.4427	-197.404	-197.404	-78.4429	-275.85	-78.4427	-197.404	-197.404	-78.4429	-275.85	-78.4427	-197.404	-197.404
44_Ethene-Pentane_1.10_dimer.out	-275.849	-78.4427	-197.404	-197.404	-78.4429	-275.849	-78.4427	-197.404	-197.404	-78.4428	-275.849	-78.4426	-197.404	-197.404	-78.4428	-275.849	-78.4427	-197.404	-197.404	-78.4429	-275.849	-78.4427	-197.404	-197.404	-78.443	-275.849	-78.4427	-197.404	-197.404	-78.4429	-275.849	-78.4428	-197.404	-197.404	-78.4429	-275.849	-78.4427	-197.404	-197.404	-78.4429	-275.849	-78.4427	-197.404	-197.404	-78.4429	-275.849	-78.4427	-197.404	-197.404
44_Ethene-Pentane_1.25_dimer.out	-275.848	-78.4427	-197.404	-197.404	-78.4428	-275.848	-78.4427	-197.404	-197.404	-78.4428	-275.848	-78.4426	-197.404	-197.404	-78.4427	-275.848	-78.4427	-197.404	-197.404	-78.4428	-275.848	-78.4427	-197.404	-197.404	-78.4429	-275.848	-78.4427	-197.404	-197.404	-78.4428	-275.848	-78.4428	-197.404	-197.404	-78.4428	-275.848	-78.4427	-197.404	-197.404	-78.4428	-275.848	-78.4427	-197.404	-197.404	-78.4428	-275.848	-78.4427	-197.404	-197.404
44_Ethene-Pentane_1.50_dimer.out	-275.847	-78.4427	-197.404	-197.404	-78.4427	-275.847	-78.4427	-197.404	-197.404	-78.4427	-275.847	-78.4426	-197.404	-197.404	-78.4427	-275.847	-78.4427	-197.404	-197.404	-78.4427	-275.847	-78.4427	-197.404	-197.404	-78.4428	-275.847	-78.4427	-197.404	-197.404	-78.4428	-275.847	-78.4428	-197.404	-197.404	-78.4428	-275.847	-78.4427	-197.404	-197.404	-78.4427	-275.847	-78.4427	-197.404	-197.404	-78.4427	-275.847	-78.4427	-197.404	-197.404
44_Ethene-Pentane_2.00_dimer.out	-275.847	-78.4427	-197.404	-197.404	-78.4427	-275.846	-78.4427	-197.404	-197.404	-78.4427	-275.846	-78.4426	-197.404	-197.404	-78.4426	-275.847	-78.4427	-197.404	-197.404	-78.4427	-275.847	-78.4427	-197.404	-197.404	-78.4428	-275.847	-78.4427	-197.404	-197.404	-78.4427	-275.847	-78.4428	-197.404	-197.404	-78.4428	-275.847	-78.4427	-197.404	-197.404	-78.4427	-275.847	-78.4427	-197.404	-197.404	-78.4427	-275.847	-78.4427	-197.404	-197.404
45_Ethyne-Pentane_0.90_dimer.out	-274.597	-77.1915	-197.404	-197.404	-77.192	-274.596	-77.1915	-197.403	-197.404	-77.1918	-274.597	-77.1915	-197.404	-197.404	-77.1919	-274.597	-77.1916	-197.404	-197.404	-77.1921	-274.597	-77.1917	-197.404	-197.404	-77.1921	-274.597	-77.1916	-197.404	-197.404	-77.1921	-274.597	-77.1916	-197.404	-197.404	-77.192	-274.597	-77.1915	-197.404	-197.404	-77.192	-274.597	-77.1915	-197.404	-197.404	-77.192	-274.597	-77.1915	-197.404	-197.404
45_Ethyne-Pentane_0.95_dimer.out	-274.598	-77.1915	-197.404	-197.404	-77.1919	-274.597	-77.1915	-197.403	-197.403	-77.1918	-274.598	-77.1915	-197.404	-197.404	-77.1919	-274.598	-77.1916	-197.404	-197.404	-77.192	-274.598	-77.1917	-197.404	-197.404	-77.1921	-274.598	-77.1916	-197.404	-197.404	-77.192	-274.598	-77.1916	-197.404	-197.404	-77.1919	-274.598	-77.1915	-197.404	-197.404	-77.1919	-274.598	-77.1915	-197.404	-197.404	-77.1919	-274.598	-77.1915	-197.404	-197.404
45_Ethyne-Pentane_1.00_dimer.out	-274.598	-77.1915	-197.404	-197.404	-77.1919	-274.598	-77.1915	-197.403	-197.403	-77.1917	-274.598	-77.1915	-197.404	-197.404	-77.1918	-274.598	-77.1916	-197.404	-197.404	-77.1919	-274.598	-77.1917	-197.404	-197.404	-77.192	-274.598	-77.1916	-197.404	-197.404	-77.1919	-274.598	-77.1916	-197.404	-197.404	-77.1919	-274.598	-77.1915	-197.404	-197.404	-77.1918	-274.598	-77.1915	-197.404	-197.404	-77.1918	-274.598	-77.1915	-197.404	-197.404
45_Ethyne-Pentane_1.05_dimer.out	-274.598	-77.1915	-197.404	-197.404	-77.1918	-274.597	-77.1915	-197.403	-197.403	-77.1917	-274.598	-77.1915	-197.404	-197.404	-77.1917	-274.598	-77.1916	-197.404	-197.404	-77.1919	-274.598	-77.1917	-197.404	-197.404	-77.192	-274.598	-77.1916	-197.404	-197.404	-77.1919	-274.598	-77.1916	-197.404	-197.404	-77.1918	-274.598	-77.1915	-197.404	-197.404	-77.1918	-274.598	-77.1915	-197.404	-197.404	-77.1918	-274.598	-77.1915	-197.404	-197.404
45_Ethyne-Pentane_1.10_dimer.out	-274.598	-77.1915	-197.404	-197.404	-77.1918	-274.597	-77.1915	-197.403	-197.403	-77.1917	-274.597	-77.1915	-197.404	-197.404	-77.1917	-274.598	-77.1916	-197.404	-197.404	-77.1918	-274.598	-77.1917	-197.404	-197.404	-77.1919	-274.598	-77.1916	-197.404	-197.404	-77.1918	-274.598	-77.1916	-197.404	-197.404	-77.1918	-274.598	-77.1915	-197.404	-197.404	-77.1918	-274.598	-77.1915	-197.404	-197.404	-77.1917	-274.598	-77.1915	-197.404	-197.404
45_Ethyne-Pentane_1.25_dimer.out	-274.597	-77.1915	-197.404	-197.404	-77.1917	-274.597	-77.1915	-197.403	-197.403	-77.1916	-274.597	-77.1915	-197.404	-197.404	-77.1916	-274.597	-77.1916	-197.404	-197.404	-77.1918	-274.597	-77.1917	-197.404	-197.404	-77.1918	-274.597	-77.1916	-197.404	-197.404	-77.1918	-274.597	-77.1916	-197.404	-197.404	-77.1916	-274.597	-77.1915	-197.404	-197.404	-77.1916	-274.597	-77.1915	-197.404	-197.404	-77.1916	-274.597	-77.1915	-197.404	-197.404
45_Ethyne-Pentane_1.50_dimer.out	-274.596	-77.1915	-197.404	-197.404	-77.1916	-274.596	-77.1915	-197.403	-197.403	-77.1916	-274.596	-77.1915	-197.404	-197.404	-77.1916	-274.596	-77.1916	-197.404	-197.404	-77.1917	-274.596	-77.1917	-197.404	-197.404	-77.1918	-274.596	-77.1916	-197.404	-197.404	-77.1917	-274.596	-77.1916	-197.404	-197.404	-77.1916	-274.596	-77.1915	-197.404	-197.404	-77.1916	-274.596	-77.1915	-197.404	-197.404	-77.1916	-274.596	-77.1915	-197.404	-197.404
45_Ethyne-Pentane_2.00_dimer.out	-274.596	-77.1915	-197.404	-197.404	-77.1915	-274.595	-77.1915	-197.403	-197.403	-77.1916	-274.595	-77.1915	-197.404	-197.404	-77.1916	-274.595	-77.1916	-197.404	-197.404	-77.1916	-274.595	-77.1917	-197.404	-197.404	-77.1917	-274.596	-77.1916	-197.404	-197.404	-77.1916	-274.595	-77.1916	-197.404	-197.404	-77.1915	-274.595	-77.1915	-197.404	-197.404	-77.1915	-274.596	-77.1915	-197.404	-197.404	-77.1915	-274.596	-77.1915	-197.404	-197.404
46_Peptide-Pentane_0.90_dimer.out	-445.551	-248.141	-197.404	-197.405	-248.142	-445.549	-248.14	-197.403	-197.404	-248.141	-445.55	-248.14	-197.404	-197.404	-248.141	-445.55	-248.14	-197.404	-197.404	-248.141	-445.549	-248.139	-197.404	-197.404	-248.14	-445.551	-248.141	-197.404	-197.405	-248.142	-445.551	-248.14	-197.404	-197.404	-248.141	-445.551	-248.14	-197.404	-197.405	-248.141	-445.551	-248.141	-197.404	-197.405	-248.141	-445.551	-248.141	-197.404	-197.405
46_Peptide-Pentane_0.95_dimer.out	-445.552	-248.141	-197.404	-197.405	-248.142	-445.55	-248.14	-197.403	-197.404	-248.14	-445.551	-248.14	-197.404	-197.404	-248.141	-445.551	-248.14	-197.404	-197.404	-248.141	-445.55	-248.139	-197.404	-197.404	-248.14	-445.552	-248.141	-197.404	-197.405	-248.141	-445.551	-248.14	-197.404	-197.404	-248.141	-445.552	-248.14	-197.404	-197.404	-248.141	-445.552	-248.141	-197.404	-197.404	-248.141	-445.552	-248.141	-197.404	-197.404
46_Peptide-Pentane_1.00_dimer.out	-445.552	-248.141	-197.404	-197.405	-248.141	-445.55	-248.14	-197.403	-197.404	-248.14	-445.551	-248.14	-197.404	-197.404	-248.141	-445.551	-248.14	-197.404	-197.404	-248.141	-445.55	-248.139	-197.404	-197.404	-248.14	-445.552	-248.141	-197.404	-197.404	-248.141	-445.551	-248.14	-197.404	-197.404	-248.141	-445.552	-248.14	-197.404	-197.404	-248.141	-445.552	-248.141	-197.404	-197.404	-248.141	-445.552	-248.141	-197.404	-197.404
46_Peptide-Pentane_1.05_dimer.out	-445.552	-248.141	-197.404	-197.404	-248.141	-445.55	-248.14	-197.403	-197.404	-248.14	-445.55	-248.14	-197.404	-197.404	-248.141	-445.551	-248.14	-197.404	-197.404	-248.141	-445.55	-248.139	-197.404	-197.404	-248.14	-445.551	-248.141	-197.404	-197.404	-248.141	-445.551	-248.14	-197.404	-197.404	-248.141	-445.551	-248.14	-197.404	-197.404	-248.141	-445.551	-248.141	-197.404	-197.404	-248.141	-445.552	-248.141	-197.404	-197.404
46_Peptide-Pentane_1.10_dimer.out	-445.551	-248.141	-197.404	-197.404	-248.141	-445.549	-248.14	-197.403	-197.404	-248.14	-445.55	-248.14	-197.404	-197.404	-248.141	-445.55	-248.14	-197.404	-197.404	-248.141	-445.549	-248.139	-197.404	-197.404	-248.14	-445.551	-248.141	-197.404	-197.404	-248.141	-445.55	-248.14	-197.404	-197.404	-248.141	-445.551	-248.14	-197.404	-197.404	-248.141	-445.551	-248.141	-197.404	-197.404	-248.141	-445.551	-248.141	-197.404	-197.404
46_Peptide-Pentane_1.25_dimer.out	-445.549	-248.141	-197.404	-197.404	-248.141	-445.548	-248.14	-197.403	-197.404	-248.14	-445.548	-248.14	-197.404	-197.404	-248.141	-445.549	-248.14	-197.404	-197.404	-248.141	-445.548	-248.139	-197.404	-197.404	-248.14	-445.549	-248.141	-197.404	-197.404	-248.141	-445.549	-248.14	-197.404	-197.404	-248.14	-445.549	-248.14	-197.404	-197.404	-248.141	-445.549	-248.141	-197.404	-197.404	-248.141	-445.549	-248.141	-197.404	-197.404
46_Peptide-Pentane_1.50_dimer.out	-445.547	-248.141	-197.404	-197.404	-248.141	-445.545	-248.14	-197.403	-197.404	-248.14	-445.546	-248.14	-197.404	-197.404	-248.14	-445.546	-248.14	-197.404	-197.404	-248.14	-445.545	-248.139	-197.404	-197.404	-248.14	-445.547	-248.141	-197.404	-197.404	-248.141	-445.546	-248.14	-197.404	-197.404	-248.14	-445.546	-248.14	-197.404	-197.404	-248.141	-445.547	-248.141	-197.404	-197.404	-248.141	-445.547	-248.141	-197.404	-197.404
46_Peptide-Pentane_2.00_dimer.out	-445.545	-248.141	-197.404	-197.404	-248.141	-445.544	-248.14	-197.403	-197.403	-248.14	-445.544	-248.14	-197.404	-197.404	-248.14	-445.544	-248.14	-197.404	-197.404	-248.14	-445.544	-248.139	-197.404	-197.404	-248.139	-445.545	-248.141	-197.404	-197.404	-248.141	-445.544	-248.14	-197.404	-197.404	-248.14	-445.545	-248.14	-197.404	-197.404	-248.14	-445.545	-248.141	-197.404	-197.404	-248.141	-445.545	-248.141	-197.404	-197.404
47_Benzene-Benzene_TS_0.90_dimer.out	-463.641	-231.819	-231.819	-231.819	-231.82	-463.639	-231.818	-231.818	-231.818	-231.819	-463.64	-231.818	-231.818	-231.819	-231.819	-463.64	-231.818	-231.818	-231.819	-231.819	-463.64	-231.818	-231.818	-231.819	-231.819	-463.641	-231.819	-231.819	-231.819	-231.82	-463.642	-231.819	-231.819	-231.82	-231.82	-463.642	-231.819	-231.819	-231.82	-231.82	-463.641	-231.819	-231.819	-231.819	-231.82	-463.641	-231.819	-231.819	-231.819
47_Benzene-Benzene_TS_0.95_dimer.out	-463.642	-231.819	-231.819	-231.819	-231.82	-463.64	-231.818	-231.818	-231.818	-231.818	-463.641	-231.818	-231.818	-231.819	-231.819	-463.642	-231.818	-231.818	-231.819	-231.819	-463.641	-231.818	-231.818	-231.819	-231.819	-463.642	-231.819	-231.819	-231.819	-231.82	-463.643	-231.819	-231.819	-231.819	-231.82	-463.643	-231.819	-231.819	-231.819	-231.82	-463.643	-231.819	-231.819	-231.819	-231.82	-463.643	-231.819	-231.819	-231.819
47_Benzene-Benzene_TS_1.00_dimer.out	-463.643	-231.819	-231.819	-231.819	-231.82	-463.64	-231.818	-231.818	-231.818	-231.818	-463.641	-231.818	-231.818	-231.818	-231.819	-463.642	-231.818	-231.818	-231.819	-231.819	-463.642	-231.818	-231.818	-231.819	-231.819	-463.643	-231.819	-231.819	-231.819	-231.819	-463.643	-231.819	-231.819	-231.819	-231.82	-463.643	-231.819	-231.819	-231.819	-231.82	-463.643	-231.819	-231.819	-231.819	-231.82	-463.643	-231.819	-231.819	-231.819
47_Benzene-Benzene_TS_1.05_dimer.out	-463.643	-231.819	-231.819	-231.819	-231.819	-463.64	-231.818	-231.818	-231.818	-231.818	-463.641	-231.818	-231.818	-231.818	-231.819	-463.642	-231.818	-231.818	-231.819	-231.819	-463.642	-231.818	-231.818	-231.819	-231.819	-463.642	-231.819	-231.819	-231.819	-231.819	-463.643	-231.819	-231.819	-231.819	-231.82	-463.643	-231.819	-231.819	-231.819	-231.82	-463.643	-231.819	-231.819	-231.819	-231.819	-463.643	-231.819	-231.819	-231.819
47_Benzene-Benzene_TS_1.10_dimer.out	-463.642	-231.819	-231.819	-231.819	-231.819	-463.64	-231.818	-231.818	-231.818	-231.818	-463.641	-231.818	-231.818	-231.818	-231.819	-463.641	-231.818	-231.818	-231.819	-231.819	-463.641	-231.818	-231.818	-231.819	-231.819	-463.642	-231.819	-231.819	-231.819	-231.819	-463.643	-231.819	-231.819	-231.819	-231.819	-463.643	-231.819	-231.819	-231.819	-231.819	-463.642	-231.819	-231.819	-231.819	-231.819	-463.642	-231.819	-231.819	-231.819
47_Benzene-Benzene_TS_1.25_dimer.out	-463.641	-231.819	-231.819	-231.819	-231.819	-463.639	-231.818	-231.818	-231.818	-231.818	-463.639	-231.818	-231.818	-231.818	-231.818	-463.64	-231.818	-231.818	-231.818	-231.819	-463.64	-231.818	-231.818	-231.818	-231.819	-463.64	-231.819	-231.819	-231.819	-231.819	-463.641	-231.819	-231.819	-231.819	-231.819	-463.641	-231.819	-231.819	-231.819	-231.819	-463.641	-231.819	-231.819	-231.819	-231.819	-463.641	-231.819	-231.819	-231.819
47_Benzene-Benzene_TS_1.50_dimer.out	-463.639	-231.819	-231.819	-231.819	-231.819	-463.637	-231.818	-231.818	-231.818	-231.818	-463.638	-231.818	-231.818	-231.818	-231.818	-463.638	-231.818	-231.818	-231.818	-231.818	-463.638	-231.818	-231.818	-231.818	-231.818	-463.639	-231.819	-231.819	-231.819	-231.819	-463.639	-231.819	-231.819	-231.819	-231.819	-463.639	-231.819	-231.819	-231.819	-231.819	-463.639	-231.819	-231.819	-231.819	-231.819	-463.639	-231.819	-231.819	-231.819
47_Benzene-Benzene_TS_2.00_dimer.out	-463.638	-231.819	-231.819	-231.819	-231.819	-463.636	-231.818	-231.818	-231.818	-231.818	-463.637	-231.818	-231.818	-231.818	-231.818	-463.637	-231.818	-231.818	-231.818	-231.818	-463.637	-231.818	-231.818	-231.818	-231.818	-463.638	-231.819	-231.819	-231.819	-231.819	-463.638	-231.819	-231.819	-231.819	-231.819	-463.638	-231.819	-231.819	-231.819	-231.819	-463.638	-231.819	-231.819	-231.819	-231.819	-463.638	-231.819	-231.819	-231.819
48_Pyridine-Pyridine_TS_0.90_dimer.out	-495.7	-247.847	-247.847	-247.848	-247.848	-495.697	-247.847	-247.847	-247.847	-247.847	-495.698	-247.847	-247.847	-247.847	-247.848	-495.698	-247.847	-247.847	-247.847	-247.848	-495.697	-247.846	-247.846	-247.847	-247.848	-495.699	-247.847	-247.847	-247.848	-247.848	-495.7	-247.847	-247.847	-247.848	-247.848	-495.7	-247.847	-247.847	-247.848	-247.849	-495.7	-247.847	-247.847	-247.848	-247.848	-495.7	-247.847	-247.847	-247.848
48_Pyridine-Pyridine_TS_0.95_dimer.out	-495.701	-247.847	-247.847	-247.848	-247.848	-495.698	-247.847	-247.847	-247.847	-247.847	-495.699	-247.847	-247.847	-247.847	-247.848	-495.7	-247.847	-247.847	-247.847	-247.848	-495.699	-247.846	-247.846	-247.847	-247.847	-495.7	-247.847	-247.847	-247.848	-247.848	-495.701	-247.847	-247.847	-247.848	-247.848	-495.701	-247.847	-247.847	-247.848	-247.848	-495.701	-247.847	-247.847	-247.848	-247.848	-495.701	-247.847	-247.847	-247.848
48_Pyridine-Pyridine_TS_1.00_dimer.out	-495.701	-247.847	-247.847	-247.848	-247.848	-495.699	-247.847	-247.847	-247.847	-247.847	-495.7	-247.847	-247.847	-247.847	-247.847	-495.7	-247.847	-247.847	-247.847	-247.848	-495.699	-247.846	-247.846	-247.847	-247.847	-495.701	-247.847	-247.847	-247.848	-247.848	-495.701	-247.847	-247.847	-247.848	-247.848	-495.701	-247.847	-247.847	-247.848	-247.848	-495.701	-247.847	-247.847	-247.848	-247.848	-495.701	-247.847	-247.847	-247.848
48_Pyridine-Pyridine_TS_1.05_dimer.out	-495.701	-247.847	-247.847	-247.848	-247.848	-495.699	-247.847	-247.847	-247.847	-247.847	-495.699	-247.847	-247.847	-247.847	-247.847	-495.7	-247.847	-247.847	-247.847	-247.847	-495.699	-247.846	-247.846	-247.847	-247.847	-495.701	-247.847	-247.847	-247.848	-247.848	-495.701	-247.847	-247.847	-247.848	-247.848	-495.701	-247.847	-247.847	-247.848	-247.848	-495.701	-247.847	-247.847	-247.848	-247.848	-495.701	-247.847	-247.847	-247.848
48_Pyridine-Pyridine_TS_1.10_dimer.out	-495.7	-247.847	-247.847	-247.848	-247.848	-495.698	-247.847	-247.847	-247.847	-247.847	-495.699	-247.847	-247.847	-247.847	-247.847	-495.699	-247.847	-247.847	-247.847	-247.847	-495.698	-247.846	-247.846	-247.847	-247.847	-495.7	-247.847	-247.847	-247.848	-247.848	-495.701	-247.847	-247.847	-247.848	-247.848	-495.701	-247.847	-247.847	-247.848	-247.848	-495.701	-247.847	-247.847	-247.848	-247.848	-495.701	-247.847	-247.847	-247.848
48_Pyridine-Pyridine_TS_1.25_dimer.out	-495.699	-247.847	-247.847	-247.848	-247.848	-495.697	-247.847	-247.847	-247.847	-247.847	-495.697	-247.847	-247.847	-247.847	-247.847	-495.698	-247.847	-247.847	-247.847	-247.847	-495.697	-247.846	-247.846	-247.847	-247.847	-495.699	-247.847	-247.847	-247.847	-247.848	-495.699	-247.847	-247.847	-247.848	-247.848	-495.699	-247.847	-247.847	-247.848	-247.848	-495.699	-247.847	-247.847	-247.848	-247.848	-495.699	-247.847	-247.847	-247.848
48_Pyridine-Pyridine_TS_1.50_dimer.out	-495.697	-247.847	-247.847	-247.847	-247.847	-495.695	-247.847	-247.847	-247.847	-247.847	-495.696	-247.847	-247.847	-247.847	-247.847	-495.696	-247.847	-247.847	-247.847	-247.847	-495.695	-247.846	-247.846	-247.846	-247.847	-495.697	-247.847	-247.847	-247.847	-247.847	-495.697	-247.847	-247.847	-247.847	-247.848	-495.697	-247.847	-247.847	-247.848	-247.848	-495.697	-247.847	-247.847	-247.848	-247.848	-495.697	-247.847	-247.847	-247.847
48_Pyridine-Pyridine_TS_2.00_dimer.out	-495.695	-247.847	-247.847	-247.847	-247.847	-495.694	-247.847	-247.847	-247.847	-247.847	-495.694	-247.847	-247.847	-247.847	-247.847	-495.694	-247.847	-247.847	-247.847	-247.847	-495.693	-247.846	-247.846	-247.846	-247.846	-495.695	-247.847	-247.847	-247.847	-247.847	-495.695	-247.847	-247.847	-247.847	-247.847	-495.696	-247.847	-247.847	-247.847	-247.848	-495.696	-247.847	-247.847	-247.847	-247.847	-495.695	-247.847	-247.847	-247.847
49_Benzene-Pyridine_TS_0.90_dimer.out	-479.67	-231.819	-247.847	-247.848	-231.82	-479.668	-231.818	-247.847	-247.847	-231.819	-479.669	-231.818	-247.847	-247.847	-231.819	-479.669	-231.818	-247.847	-247.847	-231.82	-479.669	-231.818	-247.846	-247.847	-231.819	-479.67	-231.819	-247.847	-247.848	-231.82	-479.671	-231.819	-247.847	-247.848	-231.82	-479.671	-231.819	-247.847	-247.848	-231.82	-479.671	-231.819	-247.847	-247.848	-231.82	-479.671	-231.819	-247.847	-247.848
49_Benzene-Pyridine_TS_0.95_dimer.out	-479.672	-231.819	-247.847	-247.848	-231.82	-479.669	-231.818	-247.847	-247.847	-231.819	-479.67	-231.818	-247.847	-247.847	-231.819	-479.671	-231.818	-247.847	-247.847	-231.819	-479.67	-231.818	-247.846	-247.847	-231.819	-479.672	-231.819	-247.847	-247.848	-231.82	-479.672	-231.819	-247.847	-247.848	-231.82	-479.672	-231.819	-247.847	-247.848	-231.82	-479.672	-231.819	-247.847	-247.848	-231.82	-479.672	-231.819	-247.847	-247.848
49_Benzene-Pyridine_TS_1.00_dimer.out	-479.672	-231.819	-247.847	-247.848	-231.82	-479.67	-231.818	-247.847	-247.847	-231.818	-479.671	-231.818	-247.847	-247.847	-231.819	-479.671	-231.818	-247.847	-247.847	-231.819	-479.671	-231.818	-247.846	-247.847	-231.819	-479.672	-231.819	-247.847	-247.848	-231.82	-479.673	-231.819	-247.847	-247.848	-231.82	-479.673	-231.819	-247.847	-247.848	-231.82	-479.672	-231.819	-247.847	-247.848	-231.82	-479.672	-231.819	-247.847	-247.848
49_Benzene-Pyridine_TS_1.05_dimer.out	-479.672	-231.819	-247.847	-247.848	-231.819	-479.67	-231.818	-247.847	-247.847	-231.818	-479.67	-231.818	-247.847	-247.847	-231.819	-479.671	-231.818	-247.847	-247.847	-231.819	-479.67	-231.818	-247.846	-247.847	-231.819	-479.672	-231.819	-247.847	-247.848	-231.819	-479.672	-231.819	-247.847	-247.848	-231.819	-479.672	-231.819	-247.847	-247.848	-231.82	-479.672	-231.819	-247.847	-247.848	-231.82	-479.672	-231.819	-247.847	-247.848
49_Benzene-Pyridine_TS_1.10_dimer.out	-479.671	-231.819	-247.847	-247.848	-231.819	-479.669	-231.818	-247.847	-247.847	-231.818	-479.67	-231.818	-247.847	-247.847	-231.819	-479.671	-231.818	-247.847	-247.847	-231.819	-479.67	-231.818	-247.846	-247.847	-231.819	-479.671	-231.819	-247.847	-247.848	-231.819	-479.672	-231.819	-247.847	-247.848	-231.819	-479.672	-231.819	-247.847	-247.848	-231.819	-479.672	-231.819	-247.847	-247.848	-231.819	-479.672	-231.819	-247.847	-247.848
49_Benzene-Pyridine_TS_1.25_dimer.out	-479.67	-231.819	-247.847	-247.847	-231.819	-479.668	-231.818	-247.847	-247.847	-231.818	-479.668	-231.818	-247.847	-247.847	-231.818	-479.669	-231.818	-247.847	-247.847	-231.819	-479.668	-231.818	-247.846	-247.847	-231.819	-479.67	-231.819	-247.847	-247.847	-231.819	-479.67	-231.819	-247.847	-247.847	-231.819	-479.67	-231.819	-247.847	-247.848	-231.819	-479.67	-231.819	-247.847	-247.848	-231.819	-479.67	-231.819	-247.847	-247.848
49_Benzene-Pyridine_TS_1.50_dimer.out	-479.668	-231.819	-247.847	-247.847	-231.819	-479.666	-231.818	-247.847	-247.847	-231.818	-479.667	-231.818	-247.847	-247.847	-231.818	-479.667	-231.818	-247.847	-247.847	-231.818	-479.667	-231.818	-247.846	-247.846	-231.818	-479.668	-231.819	-247.847	-247.847	-231.819	-479.668	-231.819	-247.847	-247.847	-231.819	-479.668	-231.819	-247.847	-247.847	-231.819	-479.668	-231.819	-247.847	-247.847	-231.819	-479.668	-231.819	-247.847	-247.847
49_Benzene-Pyridine_TS_2.00_dimer.out	-479.666	-231.819	-247.847	-247.847	-231.819	-479.665	-231.818	-247.847	-247.847	-231.818	-479.665	-231.818	-247.847	-247.847	-231.818	-479.666	-231.818	-247.847	-247.847	-231.818	-479.665	-231.818	-247.846	-247.846	-231.818	-479.666	-231.819	-247.847	-247.847	-231.819	-479.667	-231.819	-247.847	-247.847	-231.819	-479.667	-231.819	-247.847	-247.847	-231.819	-479.667	-231.819	-247.847	-247.847	-231.819	-479.667	-231.819	-247.847	-247.847
50_Benzene-Ethyne_CH-pi_0.90_dimer.out	-309.014	-231.819	-77.1915	-77.1919	-231.82	-309.013	-231.818	-77.1915	-77.1918	-231.819	-309.013	-231.818	-77.1915	-77.1919	-231.819	-309.013	-231.818	-77.1916	-77.192	-231.819	-309.013	-231.818	-77.1917	-77.1921	-231.819	-309.014	-231.819	-77.1916	-77.192	-231.82	-309.014	-231.819	-77.1915	-77.192	-231.82	-309.014	-231.819	-77.1915	-77.1919	-231.82	-309.014	-231.819	-77.1915	-77.1919	-231.82	-309.014	-231.819	-77.1915	-77.1919
50_Benzene-Ethyne_CH-pi_0.95_dimer.out	-309.015	-231.819	-77.1915	-77.1919	-231.819	-309.014	-231.818	-77.1915	-77.1918	-231.818	-309.014	-231.818	-77.1915	-77.1919	-231.819	-309.015	-231.818	-77.1916	-77.1919	-231.819	-309.015	-231.818	-77.1917	-77.192	-231.819	-309.015	-231.819	-77.1916	-77.192	-231.819	-309.015	-231.819	-77.1915	-77.1919	-231.82	-309.015	-231.819	-77.1915	-77.1919	-231.82	-309.015	-231.819	-77.1915	-77.1918	-231.82	-309.015	-231.819	-77.1915	-77.1918
50_Benzene-Ethyne_CH-pi_1.00_dimer.out	-309.015	-231.819	-77.1915	-77.1918	-231.819	-309.014	-231.818	-77.1915	-77.1917	-231.818	-309.015	-231.818	-77.1915	-77.1918	-231.819	-309.015	-231.818	-77.1916	-77.1919	-231.819	-309.015	-231.818	-77.1917	-77.192	-231.819	-309.015	-231.819	-77.1916	-77.1919	-231.819	-309.016	-231.819	-77.1915	-77.1919	-231.82	-309.016	-231.819	-77.1915	-77.1918	-231.82	-309.015	-231.819	-77.1915	-77.1918	-231.819	-309.015	-231.819	-77.1915	-77.1918
50_Benzene-Ethyne_CH-pi_1.05_dimer.out	-309.015	-231.819	-77.1915	-77.1918	-231.819	-309.014	-231.818	-77.1915	-77.1917	-231.818	-309.014	-231.818	-77.1915	-77.1917	-231.819	-309.015	-231.818	-77.1916	-77.1918	-231.819	-309.015	-231.818	-77.1917	-77.1919	-231.819	-309.015	-231.819	-77.1916	-77.1919	-231.819	-309.016	-231.819	-77.1915	-77.1918	-231.819	-309.015	-231.819	-77.1915	-77.1918	-231.819	-309.015	-231.819	-77.1915	-77.1918	-231.819	-309.015	-231.819	-77.1915	-77.1918
50_Benzene-Ethyne_CH-pi_1.10_dimer.out	-309.015	-231.819	-77.1915	-77.1917	-231.819	-309.014	-231.818	-77.1915	-77.1917	-231.818	-309.014	-231.818	-77.1915	-77.1917	-231.818	-309.014	-231.818	-77.1916	-77.1918	-231.819	-309.014	-231.818	-77.1917	-77.1919	-231.819	-309.015	-231.819	-77.1916	-77.1918	-231.819	-309.015	-231.819	-77.1915	-77.1916	-231.819	-309.015	-231.819	-77.1915	-77.1917	-231.819	-309.015	-231.819	-77.1915	-77.1917	-231.819	-309.015	-231.819	-77.1915	-77.1917
50_Benzene-Ethyne_CH-pi_1.25_dimer.out	-309.013	-231.819	-77.1915	-77.1916	-231.819	-309.012	-231.818	-77.1915	-77.1916	-231.818	-309.013	-231.818	-77.1915	-77.1916	-231.818	-309.013	-231.818	-77.1916	-77.1917	-231.819	-309.013	-231.818	-77.1917	-77.1918	-231.819	-309.013	-231.819	-77.1916	-77.1917	-231.819	-309.014	-231.819	-77.1915	-77.1916	-231.819	-309.014	-231.819	-77.1915	-77.1916	-231.819	-309.013	-231.819	-77.1915	-77.1916	-231.819	-309.013	-231.819	-77.1915	-77.1916
50_Benzene-Ethyne_CH-pi_1.50_dimer.out	-309.012	-231.819	-77.1915	-77.1916	-231.819	-309.011	-231.818	-77.1915	-77.1916	-231.818	-309.011	-231.818	-77.1915	-77.1916	-231.818	-309.012	-231.818	-77.1916	-77.1917	-231.818	-309.012	-231.818	-77.1917	-77.1917	-231.818	-309.012	-231.819	-77.1916	-77.1917	-231.819	-309.012	-231.819	-77.1915	-77.1916	-231.819	-309.012	-231.819	-77.1915	-77.1915	-231.819	-309.012	-231.819	-77.1915	-77.1916	-231.819	-309.012	-231.819	-77.1915	-77.1916
50_Benzene-Ethyne_CH-pi_2.00_dimer.out	-309.011	-231.819	-77.1915	-77.1915	-231.819	-309.01	-231.818	-77.1915	-77.1916	-231.818	-309.01	-231.818	-77.1915	-77.1916	-231.818	-309.01	-231.818	-77.1916	-77.1916	-231.818	-309.01	-231.818	-77.1917	-77.1917	-231.818	-309.011	-231.819	-77.1916	-77.1916	-231.819	-309.011	-231.819	-77.1915	-77.1915	-231.819	-309.011	-231.819	-77.1915	-77.1915	-231.819	-309.011	-231.819	-77.1915	-77.1915	-231.819	-309.011	-231.819	-77.1915	-77.1915
51_Ethyne-Ethyne_TS_0.90_dimer.out	-154.385	-77.1915	-77.1915	-77.1917	-77.1918	-154.385	-77.1915	-77.1915	-77.1916	-77.1918	-154.385	-77.1915	-77.1916	-77.1917	-77.1918	-154.385	-77.1916	-77.1916	-77.1917	-77.1919	-154.385	-77.1917	-77.1917	-77.1918	-77.192	-154.385	-77.1916	-77.1916	-77.1918	-77.1919	-154.385	-77.1916	-77.1916	-77.1917	-77.1919	-154.385	-77.1915	-77.1915	-77.1917	-77.1918	-154.385	-77.1915	-77.1915	-77.1917	-77.1918	-154.385	-77.1915	-77.1915	-77.1917
51_Ethyne-Ethyne_TS_0.95_dimer.out	-154.386	-77.1915	-77.1915	-77.1916	-77.1918	-154.385	-77.1915	-77.1915	-77.1916	-77.1917	-154.386	-77.1915	-77.1916	-77.1917	-77.1918	-154.386	-77.1916	-77.1916	-77.1917	-77.1919	-154.386	-77.1917	-77.1917	-77.1918	-77.1919	-154.386	-77.1916	-77.1916	-77.1917	-77.1919	-154.386	-77.1916	-77.1916	-77.1917	-77.1918	-154.386	-77.1915	-77.1915	-77.1917	-77.1918	-154.385	-77.1915	-77.1915	-77.1916	-77.1918	-154.386	-77.1915	-77.1915	-77.1916
51_Ethyne-Ethyne_TS_1.00_dimer.out	-154.386	-77.1915	-77.1915	-77.1916	-77.1917	-154.385	-77.1915	-77.1915	-77.1916	-77.1917	-154.386	-77.1915	-77.1916	-77.1916	-77.1917	-154.386	-77.1916	-77.1916	-77.1917	-77.1918	-154.386	-77.1917	-77.1917	-77.1918	-77.1919	-154.386	-77.1916	-77.1916	-77.1917	-77.1918	-154.386	-77.1916	-77.1916	-77.1917	-77.1917	-154.386	-77.1915	-77.1915	-77.1916	-77.1917	-154.386	-77.1915	-77.1915	-77.1916	-77.1917	-154.386	-77.1915	-77.1915	-77.1916
51_Ethyne-Ethyne_TS_1.05_dimer.out	-154.385	-77.1915	-77.1915	-77.1916	-77.1917	-154.385	-77.1915	-77.1915	-77.1916	-77.1917	-154.385	-77.1915	-77.1916	-77.1916	-77.1917	-154.386	-77.1916	-77.1916	-77.1917	-77.1918	-154.386	-77.1917	-77.1917	-77.1918	-77.1919	-154.386	-77.1916	-77.1916	-77.1917	-77.1918	-154.386	-77.1916	-77.1916	-77.1917	-77.1917	-154.386	-77.1915	-77.1915	-77.1916	-77.1917	-154.385	-77.1915	-77.1915	-77.1916	-77.1917	-154.385	-77.1915	-77.1915	-77.1916
51_Ethyne-Ethyne_TS_1.10_dimer.out	-154.385	-77.1915	-77.1915	-77.1916	-77.1917	-154.385	-77.1915	-77.1915	-77.1916	-77.1917	-154.385	-77.1915	-77.1916	-77.1916	-77.1917	-154.385	-77.1916	-77.1916	-77.1917	-77.1918	-154.386	-77.1917	-77.1917	-77.1918	-77.1918	-154.386	-77.1916	-77.1916	-77.1917	-77.1918	-154.385	-77.1916	-77.1916	-77.1916	-77.1917	-154.385	-77.1915	-77.1915	-77.1916	-77.1917	-154.385	-77.1915	-77.1915	-77.1916	-77.1917	-154.385	-77.1915	-77.1915	-77.1916
51_Ethyne-Ethyne_TS_1.25_dimer.out	-154.385	-77.1915	-77.1915	-77.1916	-77.1916	-154.385	-77.1915	-77.1915	-77.1916	-77.1916	-154.385	-77.1915	-77.1916	-77.1916	-77.1916	-154.385	-77.1916	-77.1916	-77.1917	-77.1917	-154.385	-77.1917	-77.1917	-77.1917	-77.1918	-154.385	-77.1916	-77.1916	-77.1917	-77.1917	-154.385	-77.1916	-77.1916	-77.1916	-77.1917	-154.385	-77.1915	-77.1915	-77.1916	-77.1916	-154.385	-77.1915	-77.1915	-77.1916	-77.1916	-154.385	-77.1915	-77.1915	-77.1916
51_Ethyne-Ethyne_TS_1.50_dimer.out	-154.384	-77.1915	-77.1915	-77.1915	-77.1916	-154.384	-77.1915	-77.1915	-77.1916	-77.1916	-154.384	-77.1915	-77.1916	-77.1916	-77.1916	-154.384	-77.1916	-77.1916	-77.1916	-77.1917	-154.384	-77.1917	-77.1917	-77.1917	-77.1917	-154.384	-77.1916	-77.1916	-77.1916	-77.1917	-154.384	-77.1916	-77.1916	-77.1916	-77.1916	-154.384	-77.1915	-77.1915	-77.1915	-77.1916	-154.384	-77.1915	-77.1915	-77.1915	-77.1915	-154.384	-77.1915	-77.1915	-77.1915
51_Ethyne-Ethyne_TS_2.00_dimer.out	-154.383	-77.1915	-77.1915	-77.1915	-77.1915	-154.383	-77.1915	-77.1915	-77.1916	-77.1916	-154.383	-77.1915	-77.1916	-77.1916	-77.1916	-154.383	-77.1916	-77.1916	-77.1916	-77.1916	-154.384	-77.1917	-77.1917	-77.1917	-77.1917	-154.383	-77.1916	-77.1916	-77.1916	-77.1916	-154.383	-77.1916	-77.1916	-77.1915	-77.1915	-154.383	-77.1915	-77.1915	-77.1915	-77.1915	-154.383	-77.1915	-77.1915	-77.1915	-77.1915	-154.383	-77.1915	-77.1915	-77.1915
52_Benzene-AcOH_OH-pi_0.90_dimer.out	-460.596	-231.819	-228.77	-228.771	-231.82	-460.594	-231.818	-228.77	-228.77	-231.819	-460.595	-231.818	-228.77	-228.771	-231.819	-460.595	-231.818	-228.77	-228.771	-231.819	-460.594	-231.818	-228.769	-228.77	-231.819	-460.596	-231.819	-228.77	-228.771	-231.82	-460.596	-231.819	-228.77	-228.771	-231.82	-460.596	-231.819	-228.77	-228.771	-231.82	-460.596	-231.819	-228.77	-228.771	-231.82	-460.596	-231.819	-228.77	-228.771
52_Benzene-AcOH_OH-pi_0.95_dimer.out	-460.597	-231.819	-228.77	-228.771	-231.819	-460.595	-231.818	-228.77	-228.77	-231.819	-460.596	-231.818	-228.77	-228.771	-231.819	-460.596	-231.818	-228.77	-228.771	-231.819	-460.595	-231.818	-228.769	-228.77	-231.819	-460.597	-231.819	-228.77	-228.771	-231.819	-460.597	-231.819	-228.77	-228.77	-231.819	-460.597	-231.819	-228.77	-228.771	-231.82	-460.597	-231.819	-228.77	-228.771	-231.82	-460.597	-231.819	-228.77	-228.771
52_Benzene-AcOH_OH-pi_1.00_dimer.out	-460.597	-231.819	-228.77	-228.771	-231.819	-460.595	-231.818	-228.77	-228.77	-231.818	-460.596	-231.818	-228.77	-228.771	-231.819	-460.596	-231.818	-228.77	-228.771	-231.819	-460.595	-231.818	-228.769	-228.77	-231.819	-460.597	-231.819	-228.77	-228.771	-231.819	-460.597	-231.819	-228.77	-228.77	-231.819	-460.597	-231.819	-228.77	-228.771	-231.819	-460.597	-231.819	-228.77	-228.771	-231.819	-460.597	-231.819	-228.77	-228.771
52_Benzene-AcOH_OH-pi_1.05_dimer.out	-460.597	-231.819	-228.77	-228.771	-231.819	-460.595	-231.818	-228.77	-228.77	-231.818	-460.596	-231.818	-228.77	-228.77	-231.819	-460.596	-231.818	-228.77	-228.771	-231.819	-460.595	-231.818	-228.769	-228.77	-231.819	-460.597	-231.819	-228.77	-228.771	-231.819	-460.597	-231.819	-228.77	-228.77	-231.819	-460.597	-231.819	-228.77	-228.77	-231.819	-460.597	-231.819	-228.77	-228.771	-231.819	-460.597	-231.819	-228.77	-228.771
52_Benzene-AcOH_OH-pi_1.10_dimer.out	-460.596	-231.819	-228.77	-228.771	-231.819	-460.595	-231.818	-228.77	-228.77	-231.818	-460.595	-231.818	-228.77	-228.77	-231.819	-460.596	-231.818	-228.77	-228.77	-231.819	-460.595	-231.818	-228.769	-228.77	-231.819	-460.596	-231.819	-228.77	-228.771	-231.819	-460.596	-231.819	-228.77	-228.77	-231.819	-460.596	-231.819	-228.77	-228.77	-231.819	-460.596	-231.819	-228.77	-228.771	-231.819	-460.596	-231.819	-228.77	-228.771
52_Benzene-AcOH_OH-pi_1.25_dimer.out	-460.594	-231.819	-228.77	-228.77	-231.819	-460.593	-231.818	-228.77	-228.77	-231.818	-460.593	-231.818	-228.77	-228.77	-231.818	-460.594	-231.818	-228.77	-228.77	-231.819	-460.593	-231.818	-228.769	-228.77	-231.819	-460.594	-231.819	-228.77	-228.771	-231.819	-460.594	-231.819	-228.77	-228.77	-231.819	-460.594	-231.819	-228.77	-228.77	-231.819	-460.594	-231.819	-228.77	-228.77	-231.819	-460.594	-231.819	-228.77	-228.77
52_Benzene-AcOH_OH-pi_1.50_dimer.out	-460.592	-231.819	-228.77	-228.77	-231.819	-460.591	-231.818	-228.77	-228.77	-231.818	-460.591	-231.818	-228.77	-228.77	-231.818	-460.591	-231.818	-228.77	-228.77	-231.818	-460.59	-231.818	-228.769	-228.769	-231.818	-460.592	-231.819	-228.77	-228.77	-231.819	-460.592	-231.819	-228.77	-228.77	-231.819	-460.592	-231.819	-228.77	-228.77	-231.819	-460.592	-231.819	-228.77	-228.77	-231.819	-460.592	-231.819	-228.77	-228.77
52_Benzene-AcOH_OH-pi_2.00_dimer.out	-460.59	-231.819	-228.77	-228.77	-231.819	-460.589	-231.818	-228.77	-228.77	-231.818	-460.589	-231.818	-228.77	-228.77	-231.818	-460.589	-231.818	-228.77	-228.77	-231.818	-460.588	-231.818	-228.769	-228.769	-231.818	-460.59	-231.819	-228.77	-228.77	-231.819	-460.589	-231.819	-228.77	-228.77	-231.819	-460.59	-231.819	-228.77	-228.77	-231.819	-460.59	-231.819	-228.77	-228.77	-231.819	-460.59	-231.819	-228.77	-228.77
53_Benzene-AcNH2_NH-pi_0.90_dimer.out	-440.732	-231.819	-208.907	-208.907	-231.819	-440.73	-231.818	-208.906	-208.907	-231.818	-440.731	-231.818	-208.907	-208.907	-231.819	-440.731	-231.818	-208.907	-208.907	-231.819	-440.73	-231.818	-208.906	-208.907	-231.819	-440.732	-231.819	-208.907	-208.907	-231.819	-440.732	-231.819	-208.906	-208.907	-231.819	-440.732	-231.819	-208.907	-208.907	-231.82	-440.732	-231.819	-208.907	-208.907	-231.819	-440.732	-231.819	-208.907	-208.907
53_Benzene-AcNH2_NH-pi_0.95_dimer.out	-440.733	-231.819	-208.907	-208.907	-231.819	-440.731	-231.818	-208.906	-208.907	-231.818	-440.732	-231.818	-208.907	-208.907	-231.819	-440.732	-231.818	-208.907	-208.907	-231.819	-440.731	-231.818	-208.906	-208.906	-231.819	-440.733	-231.819	-208.907	-208.907	-231.819	-440.733	-231.819	-208.906	-208.907	-231.819	-440.733	-231.819	-208.907	-208.907	-231.819	-440.733	-231.819	-208.907	-208.907	-231.819	-440.733	-231.819	-208.907	-208.907
53_Benzene-AcNH2_NH-pi_1.00_dimer.out	-440.733	-231.819	-208.907	-208.907	-231.819	-440.731	-231.818	-208.906	-208.907	-231.818	-440.732	-231.818	-208.907	-208.907	-231.819	-440.732	-231.818	-208.907	-208.907	-231.819	-440.731	-231.818	-208.906	-208.906	-231.819	-440.733	-231.819	-208.907	-208.907	-231.819	-440.733	-231.819	-208.906	-208.907	-231.819	-440.733	-231.819	-208.907	-208.907	-231.819	-440.733	-231.819	-208.907	-208.907	-231.819	-440.733	-231.819	-208.907	-208.907
53_Benzene-AcNH2_NH-pi_1.05_dimer.out	-440.733	-231.819	-208.907	-208.907	-231.819	-440.731	-231.818	-208.906	-208.907	-231.818	-440.732	-231.818	-208.907	-208.907	-231.818	-440.732	-231.818	-208.907	-208.907	-231.819	-440.731	-231.818	-208.906	-208.906	-231.819	-440.733	-231.819	-208.907	-208.907	-231.819	-440.732	-231.819	-208.906	-208.907	-231.819	-440.733	-231.819	-208.907	-208.907	-231.819	-440.733	-231.819	-208.907	-208.907	-231.819	-440.733	-231.819	-208.907	-208.907
53_Benzene-AcNH2_NH-pi_1.10_dimer.out	-440.732	-231.819	-208.907	-208.907	-231.819	-440.731	-231.818	-208.906	-208.907	-231.818	-440.731	-231.818	-208.907	-208.907	-231.818	-440.731	-231.818	-208.907	-208.907	-231.819	-440.731	-231.818	-208.906	-208.906	-231.819	-440.732	-231.819	-208.907	-208.907	-231.819	-440.732	-231.819	-208.906	-208.907	-231.819	-440.732	-231.819	-208.907	-208.907	-231.819	-440.732	-231.819	-208.907	-208.907	-231.819	-440.732	-231.819	-208.907	-208.907
53_Benzene-AcNH2_NH-pi_1.25_dimer.out	-440.73	-231.819	-208.907	-208.907	-231.819	-440.729	-231.818	-208.906	-208.907	-231.818	-440.73	-231.818	-208.907	-208.907	-231.818	-440.73	-231.818	-208.907	-208.907	-231.818	-440.729	-231.818	-208.906	-208.906	-231.818	-440.73	-231.819	-208.907	-208.907	-231.819	-440.73	-231.819	-208.906	-208.907	-231.819	-440.731	-231.819	-208.907	-208.907	-231.819	-440.731	-231.819	-208.907	-208.907	-231.819	-440.731	-231.819	-208.907	-208.907
53_Benzene-AcNH2_NH-pi_1.50_dimer.out	-440.728	-231.819	-208.907	-208.907	-231.819	-440.727	-231.818	-208.906	-208.906	-231.818	-440.727	-231.818	-208.907	-208.907	-231.818	-440.728	-231.818	-208.907	-208.907	-231.818	-440.727	-231.818	-208.906	-208.906	-231.818	-440.728	-231.819	-208.907	-208.907	-231.819	-440.728	-231.819	-208.906	-208.906	-231.819	-440.728	-231.819	-208.907	-208.907	-231.819	-440.728	-231.819	-208.907	-208.907	-231.819	-440.728	-231.819	-208.907	-208.907
53_Benzene-AcNH2_NH-pi_2.00_dimer.out	-440.726	-231.819	-208.907	-208.907	-231.819	-440.725	-231.818	-208.906	-208.906	-231.818	-440.725	-231.818	-208.907	-208.907	-231.818	-440.726	-231.818	-208.907	-208.907	-231.818	-440.725	-231.818	-208.906	-208.906	-231.818	-440.726	-231.819	-208.907	-208.907	-231.819	-440.726	-231.819	-208.906	-208.906	-231.819	-440.726	-231.819	-208.907	-208.907	-231.819	-440.726	-231.819	-208.907	-208.907	-231.819	-440.726	-231.819	-208.907	-208.907
54_Benzene-Water_OH-pi_0.90_dimer.out	-308.165	-231.819	-76.3415	-76.342	-231.819	-308.164	-231.818	-76.3415	-76.3418	-231.818	-308.164	-231.818	-76.3415	-76.342	-231.819	-308.165	-231.818	-76.3415	-76.3421	-231.819	-308.164	-231.818	-76.3416	-76.3421	-231.819	-308.165	-231.819	-76.3415	-76.3421	-231.819	-308.165	-231.819	-76.3414	-76.3419	-231.819	-308.165	-231.819	-76.3414	-76.342	-231.819	-308.165	-231.819	-76.3415	-76.342	-231.819	-308.165	-231.819	-76.3415	-76.342
54_Benzene-Water_OH-pi_0.95_dimer.out	-308.166	-231.819	-76.3415	-76.342	-231.819	-308.165	-231.818	-76.3415	-76.3418	-231.818	-308.165	-231.818	-76.3415	-76.3419	-231.819	-308.165	-231.818	-76.3415	-76.342	-231.819	-308.165	-231.818	-76.3416	-76.342	-231.819	-308.166	-231.819	-76.3415	-76.342	-231.819	-308.166	-231.819	-76.3414	-76.3418	-231.819	-308.166	-231.819	-76.3414	-76.3419	-231.819	-308.166	-231.819	-76.3415	-76.3419	-231.819	-308.166	-231.819	-76.3415	-76.3419
54_Benzene-Water_OH-pi_1.00_dimer.out	-308.166	-231.819	-76.3415	-76.3419	-231.819	-308.165	-231.818	-76.3415	-76.3418	-231.818	-308.165	-231.818	-76.3415	-76.3418	-231.818	-308.165	-231.818	-76.3415	-76.3419	-231.819	-308.165	-231.818	-76.3416	-76.342	-231.819	-308.166	-231.819	-76.3415	-76.3419	-231.819	-308.166	-231.819	-76.3414	-76.3417	-231.819	-308.166	-231.819	-76.3414	-76.3418	-231.819	-308.166	-231.819	-76.3415	-76.3419	-231.819	-308.166	-231.819	-76.3415	-76.3419
54_Benzene-Water_OH-pi_1.05_dimer.out	-308.165	-231.819	-76.3415	-76.3418	-231.819	-308.164	-231.818	-76.3415	-76.3417	-231.818	-308.165	-231.818	-76.3415	-76.3418	-231.818	-308.165	-231.818	-76.3415	-76.3419	-231.819	-308.165	-231.818	-76.3416	-76.3419	-231.819	-308.165	-231.819	-76.3415	-76.3419	-231.819	-308.166	-231.819	-76.3414	-76.3417	-231.819	-308.166	-231.819	-76.3414	-76.3418	-231.819	-308.166	-231.819	-76.3415	-76.3418	-231.819	-308.166	-231.819	-76.3415	-76.3418
54_Benzene-Water_OH-pi_1.10_dimer.out	-308.165	-231.819	-76.3415	-76.3418	-231.819	-308.164	-231.818	-76.3415	-76.3417	-231.818	-308.164	-231.818	-76.3415	-76.3417	-231.818	-308.165	-231.818	-76.3415	-76.3418	-231.819	-308.165	-231.818	-76.3416	-76.3419	-231.818	-308.165	-231.819	-76.3415	-76.3418	-231.819	-308.165	-231.819	-76.3414	-76.3417	-231.819	-308.165	-231.819	-76.3414	-76.3417	-231.819	-308.165	-231.819	-76.3415	-76.3418	-231.819	-308.165	-231.819	-76.3415	-76.3418
54_Benzene-Water_OH-pi_1.25_dimer.out	-308.164	-231.819	-76.3415	-76.3417	-231.819	-308.163	-231.818	-76.3415	-76.3416	-231.818	-308.163	-231.818	-76.3415	-76.3416	-231.818	-308.163	-231.818	-76.3415	-76.3417	-231.818	-308.163	-231.818	-76.3416	-76.3418	-231.818	-308.164	-231.819	-76.3415	-76.3417	-231.819	-308.164	-231.819	-76.3414	-76.3415	-231.819	-308.164	-231.819	-76.3414	-76.3416	-231.819	-308.164	-231.819	-76.3415	-76.3417	-231.819	-308.164	-231.819	-76.3415	-76.3417
54_Benzene-Water_OH-pi_1.50_dimer.out	-308.162	-231.819	-76.3415	-76.3416	-231.819	-308.161	-231.818	-76.3415	-76.3416	-231.818	-308.161	-231.818	-76.3415	-76.3415	-231.818	-308.162	-231.818	-76.3415	-76.3416	-231.818	-308.162	-231.818	-76.3416	-76.3416	-231.818	-308.162	-231.819	-76.3415	-76.3416	-231.819	-308.162	-231.819	-76.3414	-76.3415	-231.819	-308.162	-231.819	-76.3414	-76.3416	-231.819	-308.162	-231.819	-76.3415	-76.3415	-231.819	-308.162	-231.819	-76.3415	-76.3415
54_Benzene-Water_OH-pi_2.00_dimer.out	-308.161	-231.819	-76.3415	-76.3415	-231.819	-308.16	-231.818	-76.3415	-76.3415	-231.818	-308.16	-231.818	-76.3415	-76.3415	-231.818	-308.16	-231.818	-76.3415	-76.3415	-231.818	-308.16	-231.818	-76.3416	-76.3416	-231.818	-308.161	-231.819	-76.3415	-76.3415	-231.819	-308.161	-231.819	-76.3414	-76.3414	-231.819	-308.161	-231.819	-76.3414	-76.3414	-231.819	-308.161	-231.819	-76.3415	-76.3415	-231.819	-308.161	-231.819	-76.3415	-76.3415
55_Benzene-MeOH_OH-pi_0.90_dimer.out	-347.386	-231.819	-115.561	-115.562	-231.82	-347.384	-231.818	-115.561	-115.561	-231.819	-347.385	-231.818	-115.561	-115.562	-231.819	-347.385	-231.818	-115.561	-115.562	-231.819	-347.385	-231.818	-115.561	-115.562	-231.819	-347.386	-231.819	-115.561	-115.562	-231.82	-347.386	-231.819	-115.561	-115.562	-231.82	-347.386	-231.819	-115.561	-115.562	-231.82	-347.386	-231.819	-115.561	-115.562	-231.82	-347.386	-231.819	-115.561	-115.562
55_Benzene-MeOH_OH-pi_0.95_dimer.out	-347.387	-231.819	-115.561	-115.562	-231.819	-347.385	-231.818	-115.561	-115.561	-231.818	-347.386	-231.818	-115.561	-115.561	-231.819	-347.386	-231.818	-115.561	-115.562	-231.819	-347.386	-231.818	-115.561	-115.562	-231.819	-347.387	-231.819	-115.561	-115.562	-231.819	-347.387	-231.819	-115.561	-115.561	-231.819	-347.387	-231.819	-115.561	-115.562	-231.82	-347.387	-231.819	-115.561	-115.562	-231.82	-347.387	-231.819	-115.561	-115.562
55_Benzene-MeOH_OH-pi_1.00_dimer.out	-347.387	-231.819	-115.561	-115.561	-231.819	-347.385	-231.818	-115.561	-115.561	-231.818	-347.386	-231.818	-115.561	-115.561	-231.819	-347.386	-231.818	-115.561	-115.562	-231.819	-347.386	-231.818	-115.561	-115.561	-231.819	-347.387	-231.819	-115.561	-115.562	-231.819	-347.387	-231.819	-115.561	-115.561	-231.819	-347.387	-231.819	-115.561	-115.561	-231.82	-347.387	-231.819	-115.561	-115.561	-231.819	-347.387	-231.819	-115.561	-115.561
55_Benzene-MeOH_OH-pi_1.05_dimer.out	-347.387	-231.819	-115.561	-115.561	-231.819	-347.385	-231.818	-115.561	-115.561	-231.818	-347.386	-231.818	-115.561	-115.561	-231.819	-347.386	-231.818	-115.561	-115.561	-231.819	-347.386	-231.818	-115.561	-115.561	-231.819	-347.387	-231.819	-115.561	-115.561	-231.819	-347.387	-231.819	-115.561	-115.561	-231.819	-347.387	-231.819	-115.561	-115.561	-231.819	-347.387	-231.819	-115.561	-115.561	-231.819	-347.387	-231.819	-115.561	-115.561
55_Benzene-MeOH_OH-pi_1.10_dimer.out	-347.386	-231.819	-115.561	-115.561	-231.819	-347.385	-231.818	-115.561	-115.561	-231.818	-347.385	-231.818	-115.561	-115.561	-231.819	-347.386	-231.818	-115.561	-115.561	-231.819	-347.385	-231.818	-115.561	-115.561	-231.819	-347.386	-231.819	-115.561	-115.561	-231.819	-347.386	-231.819	-115.561	-115.561	-231.819	-347.386	-231.819	-115.561	-115.561	-231.819	-347.386	-231.819	-115.561	-115.561	-231.819	-347.386	-231.819	-115.561	-115.561
55_Benzene-MeOH_OH-pi_1.25_dimer.out	-347.384	-231.819	-115.561	-115.561	-231.819	-347.383	-231.818	-115.561	-115.561	-231.818	-347.384	-231.818	-115.561	-115.561	-231.818	-347.384	-231.818	-115.561	-115.561	-231.819	-347.384	-231.818	-115.561	-115.561	-231.819	-347.384	-231.819	-115.561	-115.561	-231.819	-347.385	-231.819	-115.561	-115.561	-231.819	-347.385	-231.819	-115.561	-115.561	-231.819	-347.385	-231.819	-115.561	-115.561	-231.819	-347.385	-231.819	-115.561	-115.561
55_Benzene-MeOH_OH-pi_1.50_dimer.out	-347.382	-231.819	-115.561	-115.561	-231.819	-347.381	-231.818	-115.561	-115.561	-231.818	-347.382	-231.818	-115.561	-115.561	-231.818	-347.382	-231.818	-115.561	-115.561	-231.818	-347.382	-231.818	-115.561	-115.561	-231.818	-347.382	-231.819	-115.561	-115.561	-231.819	-347.382	-231.819	-115.561	-115.561	-231.819	-347.383	-231.819	-115.561	-115.561	-231.819	-347.382	-231.819	-115.561	-115.561	-231.819	-347.382	-231.819	-115.561	-115.561
55_Benzene-MeOH_OH-pi_2.00_dimer.out	-347.381	-231.819	-115.561	-115.561	-231.819	-347.38	-231.818	-115.561	-115.561	-231.818	-347.38	-231.818	-115.561	-115.561	-231.818	-347.38	-231.818	-115.561	-115.561	-231.818	-347.38	-231.818	-115.561	-115.561	-231.818	-347.381	-231.819	-115.561	-115.561	-231.819	-347.381	-231.819	-115.561	-115.561	-231.819	-347.381	-231.819	-115.561	-115.561	-231.819	-347.381	-231.819	-115.561	-115.561	-231.819	-347.381	-231.819	-115.561	-115.561
56_Benzene-MeNH2_NH-pi_0.90_dimer.out	-327.528	-231.819	-95.7045	-95.705	-231.82	-327.526	-231.818	-95.7046	-95.7048	-231.818	-327.527	-231.818	-95.7045	-95.7049	-231.819	-327.527	-231.818	-95.7045	-95.705	-231.819	-327.527	-231.818	-95.7046	-95.7051	-231.819	-327.528	-231.819	-95.7046	-95.7051	-231.819	-327.528	-231.819	-95.7045	-95.705	-231.82	-327.528	-231.819	-95.7045	-95.705	-231.82	-327.528	-231.819	-95.7045	-95.705	-231.82	-327.528	-231.819	-95.7045	-95.705
56_Benzene-MeNH2_NH-pi_0.95_dimer.out	-327.529	-231.819	-95.7045	-95.705	-231.819	-327.527	-231.818	-95.7046	-95.7048	-231.818	-327.528	-231.818	-95.7045	-95.7049	-231.819	-327.528	-231.818	-95.7045	-95.705	-231.819	-327.528	-231.818	-95.7046	-95.705	-231.819	-327.529	-231.819	-95.7046	-95.705	-231.819	-327.529	-231.819	-95.7045	-95.7049	-231.819	-327.529	-231.819	-95.7045	-95.7049	-231.819	-327.529	-231.819	-95.7045	-95.7049	-231.82	-327.529	-231.819	-95.7045	-95.7049
56_Benzene-MeNH2_NH-pi_1.00_dimer.out	-327.529	-231.819	-95.7045	-95.7049	-231.819	-327.527	-231.818	-95.7046	-95.7047	-231.818	-327.528	-231.818	-95.7045	-95.7048	-231.819	-327.528	-231.818	-95.7045	-95.7049	-231.819	-327.528	-231.818	-95.7046	-95.705	-231.819	-327.529	-231.819	-95.7046	-95.7049	-231.819	-327.529	-231.819	-95.7045	-95.7048	-231.819	-327.529	-231.819	-95.7045	-95.7049	-231.819	-327.529	-231.819	-95.7045	-95.7049	-231.819	-327.529	-231.819	-95.7045	-95.7049
56_Benzene-MeNH2_NH-pi_1.05_dimer.out	-327.529	-231.819	-95.7045	-95.7048	-231.819	-327.527	-231.818	-95.7046	-95.7047	-231.818	-327.528	-231.818	-95.7045	-95.7047	-231.819	-327.528	-231.818	-95.7045	-95.7048	-231.819	-327.528	-231.818	-95.7046	-95.7049	-231.819	-327.529	-231.819	-95.7046	-95.7049	-231.819	-327.529	-231.819	-95.7045	-95.7048	-231.819	-327.529	-231.819	-95.7045	-95.7048	-231.819	-327.529	-231.819	-95.7045	-95.7048	-231.819	-327.529	-231.819	-95.7045	-95.7048
56_Benzene-MeNH2_NH-pi_1.10_dimer.out	-327.528	-231.819	-95.7045	-95.7048	-231.819	-327.527	-231.818	-95.7046	-95.7047	-231.818	-327.527	-231.818	-95.7045	-95.7046	-231.818	-327.528	-231.818	-95.7045	-95.7048	-231.819	-327.528	-231.818	-95.7046	-95.7049	-231.819	-327.528	-231.819	-95.7046	-95.7048	-231.819	-327.528	-231.819	-95.7045	-95.7047	-231.819	-327.528	-231.819	-95.7045	-95.7048	-231.819	-327.528	-231.819	-95.7045	-95.7048	-231.819	-327.528	-231.819	-95.7045	-95.7048
56_Benzene-MeNH2_NH-pi_1.25_dimer.out	-327.527	-231.819	-95.7045	-95.7047	-231.819	-327.526	-231.818	-95.7046	-95.7046	-231.818	-327.526	-231.818	-95.7045	-95.7046	-231.818	-327.526	-231.818	-95.7045	-95.7047	-231.819	-327.526	-231.818	-95.7046	-95.7048	-231.818	-327.527	-231.819	-95.7046	-95.7047	-231.819	-327.527	-231.819	-95.7045	-95.7046	-231.819	-327.527	-231.819	-95.7045	-95.7047	-231.819	-327.527	-231.819	-95.7045	-95.7047	-231.819	-327.527	-231.819	-95.7045	-95.7047
56_Benzene-MeNH2_NH-pi_1.50_dimer.out	-327.525	-231.819	-95.7045	-95.7046	-231.819	-327.524	-231.818	-95.7046	-95.7046	-231.818	-327.524	-231.818	-95.7045	-95.7045	-231.818	-327.525	-231.818	-95.7045	-95.7046	-231.818	-327.524	-231.818	-95.7046	-95.7047	-231.818	-327.525	-231.819	-95.7046	-95.7046	-231.819	-327.525	-231.819	-95.7045	-95.7045	-231.819	-327.525	-231.819	-95.7045	-95.7046	-231.819	-327.525	-231.819	-95.7045	-95.7046	-231.819	-327.525	-231.819	-95.7045	-95.7046
56_Benzene-MeNH2_NH-pi_2.00_dimer.out	-327.524	-231.819	-95.7045	-95.7046	-231.819	-327.523	-231.818	-95.7046	-95.7046	-231.818	-327.523	-231.818	-95.7045	-95.7045	-231.818	-327.523	-231.818	-95.7045	-95.7046	-231.818	-327.523	-231.818	-95.7046	-95.7046	-231.818	-327.524	-231.819	-95.7046	-95.7046	-231.819	-327.524	-231.819	-95.7045	-95.7045	-231.819	-327.524	-231.819	-95.7045	-95.7045	-231.819	-327.524	-231.819	-95.7045	-95.7045	-231.819	-327.524	-231.819	-95.7045	-95.7045
57_Benzene-Peptide_NH-pi_0.90_dimer.out	-479.967	-231.819	-248.141	-248.141	-231.82	-479.964	-231.818	-248.14	-248.14	-231.819	-479.965	-231.818	-248.14	-248.141	-231.819	-479.965	-231.818	-248.14	-248.141	-231.82	-479.964	-231.818	-248.139	-248.14	-231.82	-479.966	-231.819	-248.141	-248.141	-231.82	-479.966	-231.819	-248.14	-248.141	-231.82	-479.967	-231.819	-248.14	-248.141	-231.82	-479.967	-231.819	-248.141	-248.141	-231.82	-479.967	-231.819	-248.141	-248.141
57_Benzene-Peptide_NH-pi_0.95_dimer.out	-479.968	-231.819	-248.141	-248.141	-231.82	-479.966	-231.818	-248.14	-248.14	-231.819	-479.967	-231.818	-248.14	-248.141	-231.819	-479.967	-231.818	-248.14	-248.141	-231.819	-479.966	-231.818	-248.139	-248.14	-231.819	-479.968	-231.819	-248.141	-248.141	-231.82	-479.968	-231.819	-248.14	-248.141	-231.82	-479.968	-231.819	-248.14	-248.141	-231.82	-479.968	-231.819	-248.141	-248.141	-231.82	-479.968	-231.819	-248.141	-248.141
57_Benzene-Peptide_NH-pi_1.00_dimer.out	-479.969	-231.819	-248.141	-248.141	-231.82	-479.966	-231.818	-248.14	-248.14	-231.819	-479.967	-231.818	-248.14	-248.141	-231.819	-479.968	-231.818	-248.14	-248.141	-231.819	-479.967	-231.818	-248.139	-248.14	-231.819	-479.968	-231.819	-248.141	-248.141	-231.82	-479.969	-231.819	-248.14	-248.141	-231.82	-479.969	-231.819	-248.14	-248.141	-231.82	-479.969	-231.819	-248.141	-248.141	-231.82	-479.969	-231.819	-248.141	-248.141
57_Benzene-Peptide_NH-pi_1.05_dimer.out	-479.968	-231.819	-248.141	-248.141	-231.82	-479.966	-231.818	-248.14	-248.14	-231.818	-479.967	-231.818	-248.14	-248.141	-231.819	-479.967	-231.818	-248.14	-248.141	-231.819	-479.966	-231.818	-248.139	-248.14	-231.819	-479.968	-231.819	-248.141	-248.141	-231.819	-479.968	-231.819	-248.14	-248.141	-231.82	-479.968	-231.819	-248.14	-248.141	-231.82	-479.968	-231.819	-248.141	-248.141	-231.82	-479.968	-231.819	-248.141	-248.141
57_Benzene-Peptide_NH-pi_1.10_dimer.out	-479.968	-231.819	-248.141	-248.141	-231.819	-479.966	-231.818	-248.14	-248.14	-231.818	-479.966	-231.818	-248.14	-248.141	-231.819	-479.967	-231.818	-248.14	-248.141	-231.819	-479.966	-231.818	-248.139	-248.14	-231.819	-479.967	-231.819	-248.141	-248.141	-231.819	-479.968	-231.819	-248.14	-248.14	-231.819	-479.968	-231.819	-248.14	-248.141	-231.819	-479.968	-231.819	-248.141	-248.141	-231.819	-479.968	-231.819	-248.141	-248.141
57_Benzene-Peptide_NH-pi_1.25_dimer.out	-479.965	-231.819	-248.141	-248.141	-231.819	-479.963	-231.818	-248.14	-248.14	-231.818	-479.964	-231.818	-248.14	-248.14	-231.818	-479.965	-231.818	-248.14	-248.14	-231.819	-479.964	-231.818	-248.139	-248.14	-231.819	-479.965	-231.819	-248.141	-248.141	-231.819	-479.965	-231.819	-248.14	-248.14	-231.819	-479.965	-231.819	-248.14	-248.141	-231.819	-479.965	-231.819	-248.141	-248.141	-231.819	-479.965	-231.819	-248.141	-248.141
57_Benzene-Peptide_NH-pi_1.50_dimer.out	-479.962	-231.819	-248.141	-248.141	-231.819	-479.961	-231.818	-248.14	-248.14	-231.818	-479.961	-231.818	-248.14	-248.14	-231.818	-479.962	-231.818	-248.14	-248.14	-231.818	-479.961	-231.818	-248.139	-248.14	-231.818	-479.962	-231.819	-248.141	-248.141	-231.819	-479.962	-231.819	-248.14	-248.14	-231.819	-479.963	-231.819	-248.14	-248.14	-231.819	-479.963	-231.819	-248.141	-248.141	-231.819	-479.962	-231.819	-248.141	-248.141
57_Benzene-Peptide_NH-pi_2.00_dimer.out	-479.96	-231.819	-248.141	-248.141	-231.819	-479.959	-231.818	-248.14	-248.14	-231.818	-479.959	-231.818	-248.14	-248.14	-231.818	-479.96	-231.818	-248.14	-248.14	-231.818	-479.959	-231.818	-248.139	-248.139	-231.818	-479.96	-231.819	-248.141	-248.141	-231.819	-479.96	-231.819	-248.14	-248.14	-231.819	-479.96	-231.819	-248.14	-248.14	-231.819	-479.96	-231.819	-248.141	-248.141	-231.819	-479.96	-231.819	-248.141	-248.141
58_Pyridine-Pyridine_CH-N_0.90_dimer.out	-495.7	-247.847	-247.847	-247.848	-247.848	-495.697	-247.847	-247.847	-247.847	-247.847	-495.698	-247.847	-247.847	-247.847	-247.847	-495.699	-247.847	-247.847	-247.847	-247.847	-495.697	-247.846	-247.846	-247.847	-247.847	-495.699	-247.847	-247.847	-247.848	-247.848	-495.7	-247.847	-247.847	-247.848	-247.848	-495.7	-247.847	-247.847	-247.848	-247.848	-495.7	-247.847	-247.847	-247.848	-247.848	-495.7	-247.847	-247.847	-247.848
58_Pyridine-Pyridine_CH-N_0.95_dimer.out	-495.701	-247.847	-247.847	-247.848	-247.848	-495.699	-247.847	-247.847	-247.847	-247.847	-495.7	-247.847	-247.847	-247.847	-247.847	-495.7	-247.847	-247.847	-247.847	-247.847	-495.699	-247.846	-247.846	-247.847	-247.847	-495.701	-247.847	-247.847	-247.848	-247.848	-495.701	-247.847	-247.847	-247.848	-247.848	-495.702	-247.847	-247.847	-247.848	-247.848	-495.702	-247.847	-247.847	-247.848	-247.848	-495.701	-247.847	-247.847	-247.848
58_Pyridine-Pyridine_CH-N_1.00_dimer.out	-495.702	-247.847	-247.847	-247.848	-247.848	-495.7	-247.847	-247.847	-247.847	-247.847	-495.7	-247.847	-247.847	-247.847	-247.847	-495.701	-247.847	-247.847	-247.847	-247.847	-495.7	-247.846	-247.846	-247.847	-247.847	-495.701	-247.847	-247.847	-247.848	-247.848	-495.702	-247.847	-247.847	-247.848	-247.848	-495.702	-247.847	-247.847	-247.848	-247.848	-495.702	-247.847	-247.847	-247.848	-247.848	-495.702	-247.847	-247.847	-247.848
58_Pyridine-Pyridine_CH-N_1.05_dimer.out	-495.701	-247.847	-247.847	-247.848	-247.848	-495.699	-247.847	-247.847	-247.847	-247.847	-495.7	-247.847	-247.847	-247.847	-247.847	-495.7	-247.847	-247.847	-247.847	-247.847	-495.699	-247.846	-247.846	-247.847	-247.847	-495.701	-247.847	-247.847	-247.848	-247.848	-495.701	-247.847	-247.847	-247.848	-247.848	-495.702	-247.847	-247.847	-247.848	-247.848	-495.701	-247.847	-247.847	-247.848	-247.848	-495.701	-247.847	-247.847	-247.848
58_Pyridine-Pyridine_CH-N_1.10_dimer.out	-495.7	-247.847	-247.847	-247.848	-247.848	-495.699	-247.847	-247.847	-247.847	-247.847	-495.699	-247.847	-247.847	-247.847	-247.847	-495.7	-247.847	-247.847	-247.847	-247.847	-495.699	-247.846	-247.846	-247.847	-247.847	-495.7	-247.847	-247.847	-247.847	-247.847	-495.701	-247.847	-247.847	-247.848	-247.848	-495.701	-247.847	-247.847	-247.848	-247.848	-495.701	-247.847	-247.847	-247.848	-247.848	-495.701	-247.847	-247.847	-247.848
58_Pyridine-Pyridine_CH-N_1.25_dimer.out	-495.698	-247.847	-247.847	-247.847	-247.847	-495.697	-247.847	-247.847	-247.847	-247.847	-495.697	-247.847	-247.847	-247.847	-247.847	-495.697	-247.847	-247.847	-247.847	-247.847	-495.696	-247.846	-247.846	-247.847	-247.847	-495.698	-247.847	-247.847	-247.847	-247.847	-495.698	-247.847	-247.847	-247.847	-247.847	-495.699	-247.847	-247.847	-247.848	-247.848	-495.699	-247.847	-247.847	-247.848	-247.848	-495.698	-247.847	-247.847	-247.847
58_Pyridine-Pyridine_CH-N_1.50_dimer.out	-495.696	-247.847	-247.847	-247.847	-247.847	-495.695	-247.847	-247.847	-247.847	-247.847	-495.695	-247.847	-247.847	-247.847	-247.847	-495.695	-247.847	-247.847	-247.847	-247.847	-495.695	-247.846	-247.846	-247.846	-247.846	-495.696	-247.847	-247.847	-247.847	-247.847	-495.696	-247.847	-247.847	-247.847	-247.847	-495.697	-247.847	-247.847	-247.848	-247.848	-495.697	-247.847	-247.847	-247.847	-247.847	-495.696	-247.847	-247.847	-247.847
58_Pyridine-Pyridine_CH-N_2.00_dimer.out	-495.695	-247.847	-247.847	-247.847	-247.847	-495.693	-247.847	-247.847	-247.847	-247.847	-495.694	-247.847	-247.847	-247.847	-247.847	-495.694	-247.847	-247.847	-247.847	-247.847	-495.693	-247.846	-247.846	-247.846	-247.846	-495.695	-247.847	-247.847	-247.847	-247.847	-495.695	-247.847	-247.847	-247.847	-247.847	-495.695	-247.847	-247.847	-247.847	-247.847	-495.695	-247.847	-247.847	-247.847	-247.847	-495.695	-247.847	-247.847	-247.847
59_Ethyne-Water_CH-O_0.90_dimer.out	-153.537	-77.1915	-76.3415	-76.3419	-77.1917	-153.537	-77.1915	-76.3415	-76.3418	-77.1916	-153.537	-77.1915	-76.3415	-76.3418	-77.1917	-153.537	-77.1916	-76.3415	-76.3419	-77.1917	-153.537	-77.1917	-76.3416	-76.342	-77.1918	-153.537	-77.1916	-76.3416	-76.3419	-77.1918	-153.537	-77.1915	-76.3415	-76.3418	-77.1917	-153.537	-77.1915	-76.3415	-76.3418	-77.1916	-153.537	-77.1915	-76.3415	-76.3419	-77.1916	-153.537	-77.1915	-76.3415	-76.3419
59_Ethyne-Water_CH-O_0.95_dimer.out	-153.538	-77.1915	-76.3415	-76.3418	-77.1916	-153.538	-77.1915	-76.3415	-76.3417	-77.1916	-153.538	-77.1915	-76.3415	-76.3418	-77.1917	-153.538	-77.1916	-76.3415	-76.3419	-77.1917	-153.538	-77.1917	-76.3416	-76.3419	-77.1918	-153.538	-77.1916	-76.3416	-76.3419	-77.1917	-153.538	-77.1915	-76.3415	-76.3418	-77.1916	-153.538	-77.1915	-76.3415	-76.3418	-77.1916	-153.538	-77.1915	-76.3415	-76.3418	-77.1916	-153.538	-77.1915	-76.3415	-76.3418
59_Ethyne-Water_CH-O_1.00_dimer.out	-153.538	-77.1915	-76.3415	-76.3418	-77.1916	-153.538	-77.1915	-76.3415	-76.3417	-77.1916	-153.538	-77.1915	-76.3415	-76.3417	-77.1916	-153.538	-77.1916	-76.3415	-76.3418	-77.1917	-153.538	-77.1917	-76.3416	-76.3419	-77.1918	-153.538	-77.1916	-76.3416	-76.3418	-77.1917	-153.538	-77.1915	-76.3415	-76.3417	-77.1916	-153.538	-77.1915	-76.3415	-76.3418	-77.1916	-153.538	-77.1915	-76.3415	-76.3418	-77.1916	-153.538	-77.1915	-76.3415	-76.3418
59_Ethyne-Water_CH-O_1.05_dimer.out	-153.538	-77.1915	-76.3415	-76.3418	-77.1916	-153.538	-77.1915	-76.3415	-76.3417	-77.1916	-153.538	-77.1915	-76.3415	-76.3417	-77.1916	-153.538	-77.1916	-76.3415	-76.3418	-77.1917	-153.538	-77.1917	-76.3416	-76.3419	-77.1917	-153.538	-77.1916	-76.3416	-76.3418	-77.1917	-153.538	-77.1915	-76.3415	-76.3417	-77.1916	-153.538	-77.1915	-76.3415	-76.3417	-77.1916	-153.538	-77.1915	-76.3415	-76.3418	-77.1916	-153.538	-77.1915	-76.3415	-76.3418
59_Ethyne-Water_CH-O_1.10_dimer.out	-153.537	-77.1915	-76.3415	-76.3417	-77.1916	-153.537	-77.1915	-76.3415	-76.3417	-77.1916	-153.537	-77.1915	-76.3415	-76.3417	-77.1916	-153.537	-77.1916	-76.3415	-76.3418	-77.1917	-153.538	-77.1917	-76.3416	-76.3418	-77.1917	-153.537	-77.1916	-76.3416	-76.3418	-77.1917	-153.537	-77.1915	-76.3415	-76.3417	-77.1916	-153.537	-77.1915	-76.3415	-76.3417	-77.1916	-153.537	-77.1915	-76.3415	-76.3417	-77.1916	-153.537	-77.1915	-76.3415	-76.3417
59_Ethyne-Water_CH-O_1.25_dimer.out	-153.536	-77.1915	-76.3415	-76.3417	-77.1916	-153.536	-77.1915	-76.3415	-76.3416	-77.1916	-153.536	-77.1915	-76.3415	-76.3416	-77.1916	-153.536	-77.1916	-76.3415	-76.3417	-77.1916	-153.537	-77.1917	-76.3416	-76.3418	-77.1917	-153.536	-77.1916	-76.3416	-76.3417	-77.1917	-153.536	-77.1915	-76.3415	-76.3416	-77.1916	-153.536	-77.1915	-76.3415	-76.3416	-77.1916	-153.536	-77.1915	-76.3415	-76.3417	-77.1915	-153.536	-77.1915	-76.3415	-76.3417
59_Ethyne-Water_CH-O_1.50_dimer.out	-153.535	-77.1915	-76.3415	-76.3416	-77.1915	-153.535	-77.1915	-76.3415	-76.3416	-77.1916	-153.535	-77.1915	-76.3415	-76.3416	-77.1916	-153.535	-77.1916	-76.3415	-76.3417	-77.1916	-153.535	-77.1917	-76.3416	-76.3417	-77.1917	-153.535	-77.1916	-76.3416	-76.3417	-77.1916	-153.535	-77.1915	-76.3415	-76.3415	-77.1916	-153.535	-77.1915	-76.3415	-76.3416	-77.1916	-153.535	-77.1915	-76.3415	-76.3416	-77.1915	-153.535	-77.1915	-76.3415	-76.3416
59_Ethyne-Water_CH-O_2.00_dimer.out	-153.534	-77.1915	-76.3415	-76.3416	-77.1915	-153.534	-77.1915	-76.3415	-76.3416	-77.1915	-153.534	-77.1915	-76.3415	-76.3416	-77.1915	-153.534	-77.1916	-76.3415	-76.3416	-77.1916	-153.534	-77.1917	-76.3416	-76.3417	-77.1917	-153.534	-77.1916	-76.3416	-76.3416	-77.1916	-153.534	-77.1915	-76.3415	-76.3415	-77.1915	-153.534	-77.1915	-76.3415	-76.3415	-77.1915	-153.534	-77.1915	-76.3415	-76.3416	-77.1915	-153.534	-77.1915	-76.3415	-76.3416
60_Ethyne-AcOH_OH-pi_0.90_dimer.out	-305.969	-77.1915	-228.77	-228.771	-77.192	-305.968	-77.1915	-228.77	-228.77	-77.1918	-305.968	-77.1915	-228.77	-228.77	-77.1919	-305.968	-77.1916	-228.77	-228.77	-77.192	-305.968	-77.1916	-228.769	-228.77	-77.1921	-305.969	-77.1916	-228.77	-228.771	-77.192	-305.968	-77.1915	-228.77	-228.77	-77.192	-305.969	-77.1915	-228.77	-228.771	-77.192	-305.969	-77.1915	-228.77	-228.771	-77.1919	-305.969	-77.1915	-228.77	-228.771
60_Ethyne-AcOH_OH-pi_0.95_dimer.out	-305.97	-77.1915	-228.77	-228.771	-77.1919	-305.969	-77.1915	-228.77	-228.77	-77.1918	-305.969	-77.1915	-228.77	-228.77	-77.1918	-305.969	-77.1916	-228.77	-228.77	-77.192	-305.968	-77.1916	-228.769	-228.77	-77.192	-305.97	-77.1916	-228.77	-228.771	-77.192	-305.969	-77.1915	-228.77	-228.77	-77.1919	-305.969	-77.1915	-228.77	-228.77	-77.1919	-305.969	-77.1915	-228.77	-228.771	-77.1919	-305.97	-77.1915	-228.77	-228.771
60_Ethyne-AcOH_OH-pi_1.00_dimer.out	-305.97	-77.1915	-228.77	-228.771	-77.1918	-305.969	-77.1915	-228.77	-228.77	-77.1917	-305.969	-77.1915	-228.77	-228.77	-77.1917	-305.969	-77.1916	-228.77	-228.77	-77.1919	-305.969	-77.1916	-228.769	-228.77	-77.192	-305.97	-77.1916	-228.77	-228.771	-77.1919	-305.969	-77.1915	-228.77	-228.77	-77.1918	-305.969	-77.1915	-228.77	-228.77	-77.1918	-305.97	-77.1915	-228.77	-228.771	-77.1918	-305.97	-77.1915	-228.77	-228.771
60_Ethyne-AcOH_OH-pi_1.05_dimer.out	-305.969	-77.1915	-228.77	-228.77	-77.1918	-305.969	-77.1915	-228.77	-228.77	-77.1917	-305.969	-77.1915	-228.77	-228.77	-77.1917	-305.969	-77.1916	-228.77	-228.77	-77.1918	-305.968	-77.1916	-228.769	-228.77	-77.1919	-305.969	-77.1916	-228.77	-228.771	-77.1918	-305.969	-77.1915	-228.77	-228.77	-77.1918	-305.969	-77.1915	-228.77	-228.77	-77.1918	-305.969	-77.1915	-228.77	-228.77	-77.1917	-305.969	-77.1915	-228.77	-228.77
60_Ethyne-AcOH_OH-pi_1.10_dimer.out	-305.969	-77.1915	-228.77	-228.77	-77.1917	-305.968	-77.1915	-228.77	-228.77	-77.1917	-305.969	-77.1915	-228.77	-228.77	-77.1917	-305.969	-77.1916	-228.77	-228.77	-77.1918	-305.968	-77.1916	-228.769	-228.77	-77.1919	-305.969	-77.1916	-228.77	-228.771	-77.1918	-305.968	-77.1915	-228.77	-228.77	-77.1917	-305.969	-77.1915	-228.77	-228.77	-77.1917	-305.969	-77.1915	-228.77	-228.77	-77.1917	-305.969	-77.1915	-228.77	-228.77
60_Ethyne-AcOH_OH-pi_1.25_dimer.out	-305.967	-77.1915	-228.77	-228.77	-77.1916	-305.967	-77.1915	-228.77	-228.77	-77.1916	-305.967	-77.1915	-228.77	-228.77	-77.1916	-305.967	-77.1916	-228.77	-228.77	-77.1917	-305.966	-77.1916	-228.769	-228.769	-77.1918	-305.967	-77.1916	-228.77	-228.77	-77.1917	-305.967	-77.1915	-228.77	-228.77	-77.1916	-305.967	-77.1915	-228.77	-228.77	-77.1916	-305.967	-77.1915	-228.77	-228.77	-77.1916	-305.967	-77.1915	-228.77	-228.77
60_Ethyne-AcOH_OH-pi_1.50_dimer.out	-305.965	-77.1915	-228.77	-228.77	-77.1915	-305.964	-77.1915	-228.77	-228.77	-77.1915	-305.964	-77.1915	-228.77	-228.77	-77.1915	-305.964	-77.1916	-228.77	-228.77	-77.1916	-305.964	-77.1916	-228.769	-228.769	-77.1917	-305.965	-77.1916	-228.77	-228.77	-77.1916	-305.964	-77.1915	-228.77	-228.77	-77.1915	-305.965	-77.1915	-228.77	-228.77	-77.1915	-305.965	-77.1915	-228.77	-228.77	-77.1915	-305.965	-77.1915	-228.77	-228.77
60_Ethyne-AcOH_OH-pi_2.00_dimer.out	-305.963	-77.1915	-228.77	-228.77	-77.1915	-305.962	-77.1915	-228.77	-228.77	-77.1915	-305.962	-77.1915	-228.77	-228.77	-77.1915	-305.962	-77.1916	-228.77	-228.77	-77.1916	-305.962	-77.1916	-228.769	-228.769	-77.1917	-305.963	-77.1916	-228.77	-228.77	-77.1916	-305.962	-77.1915	-228.77	-228.77	-77.1915	-305.962	-77.1915	-228.77	-228.77	-77.1915	-305.963	-77.1915	-228.77	-228.77	-77.1915	-305.963	-77.1915	-228.77	-228.77
61_Pentane-AcOH_0.90_dimer.out	-426.179	-197.404	-228.77	-228.771	-197.404	-426.178	-197.403	-228.77	-228.77	-197.404	-426.178	-197.404	-228.77	-228.771	-197.404	-426.179	-197.404	-228.77	-228.771	-197.404	-426.177	-197.404	-228.769	-228.77	-197.404	-426.179	-197.404	-228.77	-228.771	-197.404	-426.179	-197.404	-228.77	-228.771	-197.404	-426.179	-197.404	-228.77	-228.771	-197.404	-426.179	-197.404	-228.77	-228.771	-197.404	-426.179	-197.404	-228.77	-228.771
61_Pentane-AcOH_0.95_dimer.out	-426.18	-197.404	-228.77	-228.771	-197.404	-426.178	-197.403	-228.77	-228.77	-197.404	-426.179	-197.404	-228.77	-228.771	-197.404	-426.179	-197.404	-228.77	-228.771	-197.404	-426.178	-197.404	-228.769	-228.77	-197.404	-426.179	-197.404	-228.77	-228.771	-197.404	-426.179	-197.404	-228.77	-228.77	-197.404	-426.179	-197.404	-228.77	-228.771	-197.404	-426.179	-197.404	-228.77	-228.771	-197.404	-426.179	-197.404	-228.77	-228.771
61_Pentane-AcOH_1.00_dimer.out	-426.179	-197.404	-228.77	-228.771	-197.404	-426.178	-197.403	-228.77	-228.77	-197.404	-426.179	-197.404	-228.77	-228.771	-197.404	-426.179	-197.404	-228.77	-228.771	-197.404	-426.178	-197.404	-228.769	-228.77	-197.404	-426.179	-197.404	-228.77	-228.771	-197.404	-426.179	-197.404	-228.77	-228.77	-197.404	-426.179	-197.404	-228.77	-228.771	-197.404	-426.179	-197.404	-228.77	-228.771	-197.404	-426.179	-197.404	-228.77	-228.771
61_Pentane-AcOH_1.05_dimer.out	-426.179	-197.404	-228.77	-228.771	-197.404	-426.178	-197.403	-228.77	-228.77	-197.404	-426.178	-197.404	-228.77	-228.771	-197.404	-426.179	-197.404	-228.77	-228.771	-197.404	-426.178	-197.404	-228.769	-228.77	-197.404	-426.179	-197.404	-228.77	-228.771	-197.404	-426.179	-197.404	-228.77	-228.77	-197.404	-426.179	-197.404	-228.77	-228.771	-197.404	-426.179	-197.404	-228.77	-228.771	-197.404	-426.179	-197.404	-228.77	-228.771
61_Pentane-AcOH_1.10_dimer.out	-426.179	-197.404	-228.77	-228.771	-197.404	-426.177	-197.403	-228.77	-228.77	-197.404	-426.178	-197.404	-228.77	-228.77	-197.404	-426.178	-197.404	-228.77	-228.771	-197.404	-426.177	-197.404	-228.769	-228.77	-197.404	-426.179	-197.404	-228.77	-228.771	-197.404	-426.178	-197.404	-228.77	-228.77	-197.404	-426.178	-197.404	-228.77	-228.771	-197.404	-426.179	-197.404	-228.77	-228.771	-197.404	-426.179	-197.404	-228.77	-228.771
61_Pentane-AcOH_1.25_dimer.out	-426.177	-197.404	-228.77	-228.771	-197.404	-426.176	-197.403	-228.77	-228.77	-197.404	-426.177	-197.404	-228.77	-228.77	-197.404	-426.177	-197.404	-228.77	-228.77	-197.404	-426.176	-197.404	-228.769	-228.77	-197.404	-426.177	-197.404	-228.77	-228.771	-197.404	-426.177	-197.404	-228.77	-228.77	-197.404	-426.177	-197.404	-228.77	-228.77	-197.404	-426.177	-197.404	-228.77	-228.771	-197.404	-426.177	-197.404	-228.77	-228.771
61_Pentane-AcOH_1.50_dimer.out	-426.176	-197.404	-228.77	-228.77	-197.404	-426.175	-197.403	-228.77	-228.77	-197.403	-426.175	-197.404	-228.77	-228.77	-197.404	-426.175	-197.404	-228.77	-228.77	-197.404	-426.174	-197.404	-228.769	-228.77	-197.404	-426.176	-197.404	-228.77	-228.771	-197.404	-426.175	-197.404	-228.77	-228.77	-197.404	-426.175	-197.404	-228.77	-228.77	-197.404	-426.176	-197.404	-228.77	-228.77	-197.404	-426.176	-197.404	-228.77	-228.77
61_Pentane-AcOH_2.00_dimer.out	-426.175	-197.404	-228.77	-228.77	-197.404	-426.174	-197.403	-228.77	-228.77	-197.403	-426.174	-197.404	-228.77	-228.77	-197.404	-426.174	-197.404	-228.77	-228.77	-197.404	-426.173	-197.404	-228.769	-228.769	-197.404	-426.175	-197.404	-228.77	-228.77	-197.404	-426.174	-197.404	-228.77	-228.77	-197.404	-426.174	-197.404	-228.77	-228.77	-197.404	-426.174	-197.404	-228.77	-228.77	-197.404	-426.174	-197.404	-228.77	-228.77
62_Pentane-AcNH2_0.90_dimer.out	-406.316	-197.404	-208.907	-208.908	-197.405	-406.315	-197.403	-208.906	-208.907	-197.404	-406.316	-197.404	-208.907	-208.907	-197.404	-406.316	-197.404	-208.907	-208.907	-197.404	-406.315	-197.404	-208.906	-208.907	-197.404	-406.316	-197.404	-208.907	-208.908	-197.404	-406.316	-197.404	-208.906	-208.907	-197.404	-406.316	-197.404	-208.907	-208.907	-197.404	-406.316	-197.404	-208.907	-208.908	-197.404	-406.316	-197.404	-208.907	-208.908
62_Pentane-AcNH2_0.95_dimer.out	-406.317	-197.404	-208.907	-208.908	-197.404	-406.315	-197.403	-208.906	-208.907	-197.404	-406.316	-197.404	-208.907	-208.907	-197.404	-406.316	-197.404	-208.907	-208.907	-197.404	-406.315	-197.404	-208.906	-208.907	-197.404	-406.317	-197.404	-208.907	-208.908	-197.404	-406.316	-197.404	-208.906	-208.907	-197.404	-406.317	-197.404	-208.907	-208.907	-197.404	-406.317	-197.404	-208.907	-208.907	-197.404	-406.317	-197.404	-208.907	-208.907
62_Pentane-AcNH2_1.00_dimer.out	-406.317	-197.404	-208.907	-208.907	-197.404	-406.315	-197.403	-208.906	-208.907	-197.404	-406.316	-197.404	-208.907	-208.907	-197.404	-406.316	-197.404	-208.907	-208.907	-197.404	-406.315	-197.404	-208.906	-208.907	-197.404	-406.317	-197.404	-208.907	-208.907	-197.404	-406.316	-197.404	-208.906	-208.907	-197.404	-406.317	-197.404	-208.907	-208.907	-197.404	-406.317	-197.404	-208.907	-208.907	-197.404	-406.317	-197.404	-208.907	-208.907
62_Pentane-AcNH2_1.05_dimer.out	-406.317	-197.404	-208.907	-208.907	-197.404	-406.315	-197.403	-208.906	-208.907	-197.404	-406.316	-197.404	-208.907	-208.907	-197.404	-406.316	-197.404	-208.907	-208.907	-197.404	-406.315	-197.404	-208.906	-208.907	-197.404	-406.316	-197.404	-208.907	-208.907	-197.404	-406.316	-197.404	-208.906	-208.907	-197.404	-406.316	-197.404	-208.907	-208.907	-197.404	-406.316	-197.404	-208.907	-208.907	-197.404	-406.316	-197.404	-208.907	-208.907
62_Pentane-AcNH2_1.10_dimer.out	-406.316	-197.404	-208.907	-208.907	-197.404	-406.315	-197.403	-208.906	-208.907	-197.404	-406.315	-197.404	-208.907	-208.907	-197.404	-406.315	-197.404	-208.907	-208.907	-197.404	-406.315	-197.404	-208.906	-208.907	-197.404	-406.316	-197.404	-208.907	-208.907	-197.404	-406.316	-197.404	-208.906	-208.907	-197.404	-406.316	-197.404	-208.907	-208.907	-197.404	-406.316	-197.404	-208.907	-208.907	-197.404	-406.316	-197.404	-208.907	-208.907
62_Pentane-AcNH2_1.25_dimer.out	-406.314	-197.404	-208.907	-208.907	-197.404	-406.313	-197.403	-208.906	-208.907	-197.404	-406.314	-197.404	-208.907	-208.907	-197.404	-406.314	-197.404	-208.907	-208.907	-197.404	-406.313	-197.404	-208.906	-208.906	-197.404	-406.314	-197.404	-208.907	-208.907	-197.404	-406.314	-197.404	-208.906	-208.907	-197.404	-406.314	-197.404	-208.907	-208.907	-197.404	-406.314	-197.404	-208.907	-208.907	-197.404	-406.314	-197.404	-208.907	-208.907
62_Pentane-AcNH2_1.50_dimer.out	-406.313	-197.404	-208.907	-208.907	-197.404	-406.312	-197.403	-208.906	-208.907	-197.403	-406.312	-197.404	-208.907	-208.907	-197.404	-406.312	-197.404	-208.907	-208.907	-197.404	-406.311	-197.404	-208.906	-208.906	-197.404	-406.313	-197.404	-208.907	-208.907	-197.404	-406.312	-197.404	-208.906	-208.906	-197.404	-406.312	-197.404	-208.907	-208.907	-197.404	-406.312	-197.404	-208.907	-208.907	-197.404	-406.313	-197.404	-208.907	-208.907
62_Pentane-AcNH2_2.00_dimer.out	-406.311	-197.404	-208.907	-208.907	-197.404	-406.31	-197.403	-208.906	-208.907	-197.403	-406.311	-197.404	-208.907	-208.907	-197.404	-406.311	-197.404	-208.907	-208.907	-197.404	-406.31	-197.404	-208.906	-208.906	-197.404	-406.311	-197.404	-208.907	-208.907	-197.404	-406.311	-197.404	-208.906	-208.906	-197.404	-406.311	-197.404	-208.907	-208.907	-197.404	-406.311	-197.404	-208.907	-208.907	-197.404	-406.311	-197.404	-208.907	-208.907
63_Benzene-AcOH_0.90_dimer.out	-460.594	-231.819	-228.77	-228.771	-231.82	-460.592	-231.818	-228.77	-228.77	-231.819	-460.593	-231.818	-228.77	-228.771	-231.819	-460.594	-231.818	-228.77	-228.771	-231.819	-460.592	-231.818	-228.769	-228.77	-231.819	-460.594	-231.819	-228.77	-228.771	-231.82	-460.594	-231.819	-228.77	-228.771	-231.82	-460.594	-231.819	-228.77	-228.771	-231.82	-460.595	-231.819	-228.77	-228.771	-231.82	-460.595	-231.819	-228.77	-228.771
63_Benzene-AcOH_0.95_dimer.out	-460.596	-231.819	-228.77	-228.771	-231.82	-460.593	-231.818	-228.77	-228.77	-231.818	-460.595	-231.818	-228.77	-228.771	-231.819	-460.595	-231.818	-228.77	-228.771	-231.819	-460.594	-231.818	-228.769	-228.77	-231.819	-460.596	-231.819	-228.77	-228.771	-231.82	-460.596	-231.819	-228.77	-228.771	-231.82	-460.596	-231.819	-228.77	-228.771	-231.82	-460.596	-231.819	-228.77	-228.771	-231.82	-460.596	-231.819	-228.77	-228.771
63_Benzene-AcOH_1.00_dimer.out	-460.596	-231.819	-228.77	-228.771	-231.819	-460.594	-231.818	-228.77	-228.77	-231.818	-460.595	-231.818	-228.77	-228.771	-231.819	-460.595	-231.818	-228.77	-228.771	-231.819	-460.594	-231.818	-228.769	-228.77	-231.819	-460.596	-231.819	-228.77	-228.771	-231.819	-460.596	-231.819	-228.77	-228.77	-231.819	-460.596	-231.819	-228.77	-228.771	-231.82	-460.596	-231.819	-228.77	-228.771	-231.82	-460.596	-231.819	-228.77	-228.771
63_Benzene-AcOH_1.05_dimer.out	-460.596	-231.819	-228.77	-228.771	-231.819	-460.594	-231.818	-228.77	-228.77	-231.818	-460.594	-231.818	-228.77	-228.771	-231.819	-460.595	-231.818	-228.77	-228.771	-231.819	-460.594	-231.818	-228.769	-228.77	-231.819	-460.595	-231.819	-228.77	-228.771	-231.819	-460.596	-231.819	-228.77	-228.77	-231.819	-460.596	-231.819	-228.77	-228.771	-231.819	-460.596	-231.819	-228.77	-228.771	-231.819	-460.596	-231.819	-228.77	-228.771
63_Benzene-AcOH_1.10_dimer.out	-460.595	-231.819	-228.77	-228.771	-231.819	-460.593	-231.818	-228.77	-228.77	-231.818	-460.594	-231.818	-228.77	-228.77	-231.818	-460.594	-231.818	-228.77	-228.771	-231.819	-460.593	-231.818	-228.769	-228.77	-231.819	-460.595	-231.819	-228.77	-228.771	-231.819	-460.595	-231.819	-228.77	-228.77	-231.819	-460.595	-231.819	-228.77	-228.771	-231.819	-460.595	-231.819	-228.77	-228.771	-231.819	-460.595	-231.819	-228.77	-228.771
63_Benzene-AcOH_1.25_dimer.out	-460.593	-231.819	-228.77	-228.771	-231.819	-460.592	-231.818	-228.77	-228.77	-231.818	-460.592	-231.818	-228.77	-228.77	-231.818	-460.592	-231.818	-228.77	-228.77	-231.819	-460.592	-231.818	-228.769	-228.77	-231.819	-460.593	-231.819	-228.77	-228.771	-231.819	-460.593	-231.819	-228.77	-228.77	-231.819	-460.593	-231.819	-228.77	-228.77	-231.819	-460.593	-231.819	-228.77	-228.771	-231.819	-460.593	-231.819	-228.77	-228.771
63_Benzene-AcOH_1.50_dimer.out	-460.591	-231.819	-228.77	-228.77	-231.819	-460.59	-231.818	-228.77	-228.77	-231.818	-460.59	-231.818	-228.77	-228.77	-231.818	-460.59	-231.818	-228.77	-228.77	-231.818	-460.589	-231.818	-228.769	-228.769	-231.818	-460.591	-231.819	-228.77	-228.771	-231.819	-460.591	-231.819	-228.77	-228.77	-231.819	-460.591	-231.819	-228.77	-228.77	-231.819	-460.591	-231.819	-228.77	-228.77	-231.819	-460.591	-231.819	-228.77	-228.77
63_Benzene-AcOH_2.00_dimer.out	-460.589	-231.819	-228.77	-228.77	-231.819	-460.588	-231.818	-228.77	-228.77	-231.818	-460.589	-231.818	-228.77	-228.77	-231.818	-460.589	-231.818	-228.77	-228.77	-231.818	-460.588	-231.818	-228.769	-228.769	-231.818	-460.589	-231.819	-228.77	-228.77	-231.819	-460.589	-231.819	-228.77	-228.77	-231.819	-460.589	-231.819	-228.77	-228.77	-231.819	-460.59	-231.819	-228.77	-228.77	-231.819	-460.589	-231.819	-228.77	-228.77
64_Peptide-Ethene_0.90_dimer.out	-326.588	-248.141	-78.4426	-78.4431	-248.141	-326.587	-248.14	-78.4427	-78.4429	-248.14	-326.587	-248.14	-78.4426	-78.443	-248.141	-326.587	-248.14	-78.4427	-78.4431	-248.141	-326.586	-248.139	-78.4427	-78.4432	-248.14	-326.588	-248.141	-78.4427	-78.4431	-248.141	-326.587	-248.14	-78.4427	-78.4431	-248.141	-326.588	-248.14	-78.4427	-78.4431	-248.141	-326.588	-248.141	-78.4427	-78.4431	-248.141	-326.588	-248.141	-78.4426	-78.443
64_Peptide-Ethene_0.95_dimer.out	-326.588	-248.141	-78.4426	-78.443	-248.141	-326.587	-248.14	-78.4427	-78.4428	-248.14	-326.588	-248.14	-78.4426	-78.4429	-248.141	-326.588	-248.14	-78.4427	-78.443	-248.141	-326.587	-248.139	-78.4427	-78.4431	-248.14	-326.588	-248.141	-78.4427	-78.4431	-248.141	-326.588	-248.14	-78.4427	-78.443	-248.141	-326.588	-248.14	-78.4427	-78.443	-248.141	-326.588	-248.141	-78.4427	-78.443	-248.141	-326.588	-248.141	-78.4426	-78.443
64_Peptide-Ethene_1.00_dimer.out	-326.588	-248.141	-78.4426	-78.443	-248.141	-326.587	-248.14	-78.4427	-78.4428	-248.14	-326.588	-248.14	-78.4426	-78.4428	-248.141	-326.588	-248.14	-78.4427	-78.443	-248.141	-326.587	-248.139	-78.4427	-78.4431	-248.14	-326.588	-248.141	-78.4427	-78.443	-248.141	-326.588	-248.14	-78.4427	-78.443	-248.14	-326.588	-248.14	-78.4427	-78.443	-248.141	-326.588	-248.141	-78.4427	-78.443	-248.141	-326.588	-248.141	-78.4426	-78.4429
64_Peptide-Ethene_1.05_dimer.out	-326.588	-248.141	-78.4426	-78.4429	-248.141	-326.587	-248.14	-78.4427	-78.4428	-248.14	-326.588	-248.14	-78.4426	-78.4428	-248.141	-326.588	-248.14	-78.4427	-78.4429	-248.141	-326.587	-248.139	-78.4427	-78.443	-248.14	-326.588	-248.141	-78.4427	-78.443	-248.141	-326.588	-248.14	-78.4427	-78.4429	-248.14	-326.588	-248.14	-78.4427	-78.4429	-248.141	-326.588	-248.141	-78.4427	-78.4429	-248.141	-326.588	-248.141	-78.4426	-78.4429
64_Peptide-Ethene_1.10_dimer.out	-326.588	-248.141	-78.4426	-78.4429	-248.141	-326.587	-248.14	-78.4427	-78.4428	-248.14	-326.587	-248.14	-78.4426	-78.4428	-248.141	-326.587	-248.14	-78.4427	-78.4429	-248.141	-326.586	-248.139	-78.4427	-78.443	-248.14	-326.588	-248.141	-78.4427	-78.4429	-248.141	-326.587	-248.14	-78.4427	-78.443	-248.14	-326.588	-248.14	-78.4427	-78.4429	-248.141	-326.588	-248.141	-78.4427	-78.4429	-248.141	-326.588	-248.141	-78.4426	-78.4429
64_Peptide-Ethene_1.25_dimer.out	-326.586	-248.141	-78.4426	-78.4428	-248.141	-326.586	-248.14	-78.4427	-78.4428	-248.14	-326.586	-248.14	-78.4426	-78.4427	-248.14	-326.586	-248.14	-78.4427	-78.4428	-248.14	-326.585	-248.139	-78.4427	-78.4429	-248.14	-326.586	-248.141	-78.4427	-78.4429	-248.141	-326.586	-248.14	-78.4427	-78.4428	-248.14	-326.586	-248.14	-78.4427	-78.4428	-248.141	-326.586	-248.141	-78.4427	-78.4428	-248.141	-326.586	-248.141	-78.4426	-78.4428
64_Peptide-Ethene_1.50_dimer.out	-326.585	-248.141	-78.4426	-78.4427	-248.141	-326.584	-248.14	-78.4427	-78.4427	-248.14	-326.584	-248.14	-78.4426	-78.4426	-248.14	-326.584	-248.14	-78.4427	-78.4427	-248.14	-326.584	-248.139	-78.4427	-78.4428	-248.14	-326.585	-248.141	-78.4427	-78.4428	-248.141	-326.584	-248.14	-78.4427	-78.4428	-248.14	-326.585	-248.14	-78.4427	-78.4427	-248.14	-326.585	-248.141	-78.4427	-78.4427	-248.141	-326.585	-248.141	-78.4426	-78.4427
64_Peptide-Ethene_2.00_dimer.out	-326.584	-248.141	-78.4426	-78.4427	-248.141	-326.583	-248.14	-78.4427	-78.4427	-248.14	-326.583	-248.14	-78.4426	-78.4426	-248.14	-326.583	-248.14	-78.4427	-78.4427	-248.14	-326.583	-248.139	-78.4427	-78.4427	-248.139	-326.584	-248.141	-78.4427	-78.4427	-248.141	-326.583	-248.14	-78.4427	-78.4427	-248.14	-326.583	-248.14	-78.4427	-78.4427	-248.14	-326.584	-248.141	-78.4427	-78.4427	-248.141	-326.584	-248.141	-78.4426	-78.4427
65_Pyridine-Ethyne_0.90_dimer.out	-325.045	-247.847	-77.1915	-77.1918	-247.848	-325.044	-247.847	-77.1915	-77.1917	-247.847	-325.044	-247.847	-77.1915	-77.1918	-247.847	-325.044	-247.847	-77.1916	-77.1919	-247.847	-325.044	-247.846	-77.1917	-77.192	-247.847	-325.045	-247.847	-77.1916	-77.1919	-247.848	-325.045	-247.847	-77.1915	-77.1919	-247.848	-325.045	-247.847	-77.1915	-77.1918	-247.848	-325.045	-247.847	-77.1915	-77.1918	-247.848	-325.045	-247.847	-77.1915	-77.1918
65_Pyridine-Ethyne_0.95_dimer.out	-325.045	-247.847	-77.1915	-77.1918	-247.848	-325.044	-247.847	-77.1915	-77.1917	-247.847	-325.045	-247.847	-77.1915	-77.1917	-247.847	-325.045	-247.847	-77.1916	-77.1918	-247.847	-325.044	-247.846	-77.1917	-77.1919	-247.847	-325.045	-247.847	-77.1916	-77.1919	-247.848	-325.046	-247.847	-77.1915	-77.1918	-247.848	-325.046	-247.847	-77.1915	-77.1918	-247.848	-325.045	-247.847	-77.1915	-77.1918	-247.848	-325.045	-247.847	-77.1915	-77.1918
65_Pyridine-Ethyne_1.00_dimer.out	-325.045	-247.847	-77.1915	-77.1917	-247.848	-325.044	-247.847	-77.1915	-77.1917	-247.847	-325.045	-247.847	-77.1915	-77.1917	-247.847	-325.045	-247.847	-77.1916	-77.1918	-247.847	-325.045	-247.846	-77.1917	-77.1919	-247.847	-325.046	-247.847	-77.1916	-77.1918	-247.848	-325.046	-247.847	-77.1915	-77.1918	-247.848	-325.046	-247.847	-77.1915	-77.1917	-247.848	-325.046	-247.847	-77.1915	-77.1917	-247.848	-325.046	-247.847	-77.1915	-77.1917
65_Pyridine-Ethyne_1.05_dimer.out	-325.045	-247.847	-77.1915	-77.1917	-247.848	-325.044	-247.847	-77.1915	-77.1917	-247.847	-325.045	-247.847	-77.1915	-77.1917	-247.847	-325.045	-247.847	-77.1916	-77.1918	-247.847	-325.044	-247.846	-77.1917	-77.1918	-247.847	-325.045	-247.847	-77.1916	-77.1918	-247.847	-325.045	-247.847	-77.1915	-77.1917	-247.848	-325.045	-247.847	-77.1915	-77.1917	-247.848	-325.045	-247.847	-77.1915	-77.1917	-247.848	-325.045	-247.847	-77.1915	-77.1917
65_Pyridine-Ethyne_1.10_dimer.out	-325.045	-247.847	-77.1915	-77.1917	-247.847	-325.044	-247.847	-77.1915	-77.1916	-247.847	-325.044	-247.847	-77.1915	-77.1917	-247.847	-325.044	-247.847	-77.1916	-77.1917	-247.847	-325.044	-247.846	-77.1917	-77.1918	-247.847	-325.045	-247.847	-77.1916	-77.1918	-247.847	-325.045	-247.847	-77.1915	-77.1917	-247.848	-325.045	-247.847	-77.1915	-77.1917	-247.848	-325.045	-247.847	-77.1915	-77.1917	-247.848	-325.045	-247.847	-77.1915	-77.1917
65_Pyridine-Ethyne_1.25_dimer.out	-325.043	-247.847	-77.1915	-77.1916	-247.847	-325.043	-247.847	-77.1915	-77.1916	-247.847	-325.043	-247.847	-77.1915	-77.1916	-247.847	-325.043	-247.847	-77.1916	-77.1917	-247.847	-325.043	-247.846	-77.1917	-77.1918	-247.847	-325.044	-247.847	-77.1916	-77.1917	-247.847	-325.044	-247.847	-77.1915	-77.1916	-247.847	-325.044	-247.847	-77.1915	-77.1916	-247.848	-325.044	-247.847	-77.1915	-77.1916	-247.848	-325.044	-247.847	-77.1915	-77.1916
65_Pyridine-Ethyne_1.50_dimer.out	-325.042	-247.847	-77.1915	-77.1916	-247.847	-325.041	-247.847	-77.1915	-77.1916	-247.847	-325.041	-247.847	-77.1915	-77.1916	-247.847	-325.041	-247.847	-77.1916	-77.1916	-247.847	-325.041	-247.846	-77.1917	-77.1917	-247.846	-325.042	-247.847	-77.1916	-77.1917	-247.847	-325.042	-247.847	-77.1915	-77.1916	-247.847	-325.042	-247.847	-77.1915	-77.1915	-247.848	-325.042	-247.847	-77.1915	-77.1915	-247.847	-325.042	-247.847	-77.1915	-77.1915
65_Pyridine-Ethyne_2.00_dimer.out	-325.04	-247.847	-77.1915	-77.1915	-247.847	-325.039	-247.847	-77.1915	-77.1915	-247.847	-325.039	-247.847	-77.1915	-77.1915	-247.847	-325.039	-247.847	-77.1916	-77.1916	-247.847	-325.039	-247.846	-77.1917	-77.1917	-247.846	-325.04	-247.847	-77.1916	-77.1916	-247.847	-325.04	-247.847	-77.1915	-77.1915	-247.847	-325.04	-247.847	-77.1915	-77.1915	-247.847	-325.04	-247.847	-77.1915	-77.1915	-247.847	-325.04	-247.847	-77.1915	-77.1915
66_MeNH2-Pyridine_0.90_dimer.out	-343.558	-95.7045	-247.847	-247.848	-95.705	-343.556	-95.7046	-247.847	-247.847	-95.7048	-343.557	-95.7045	-247.847	-247.847	-95.7049	-343.557	-95.7046	-247.847	-247.847	-95.705	-343.556	-95.7046	-247.846	-247.847	-95.7051	-343.558	-95.7046	-247.847	-247.848	-95.705	-343.558	-95.7045	-247.847	-247.848	-95.705	-343.558	-95.7045	-247.847	-247.848	-95.705	-343.558	-95.7045	-247.847	-247.848	-95.705	-343.558	-95.7045	-247.847	-247.848
66_MeNH2-Pyridine_0.95_dimer.out	-343.558	-95.7045	-247.847	-247.848	-95.705	-343.557	-95.7046	-247.847	-247.847	-95.7047	-343.558	-95.7045	-247.847	-247.847	-95.7048	-343.558	-95.7046	-247.847	-247.847	-95.705	-343.557	-95.7046	-247.846	-247.847	-95.705	-343.558	-95.7046	-247.847	-247.848	-95.705	-343.559	-95.7045	-247.847	-247.848	-95.7049	-343.559	-95.7045	-247.847	-247.848	-95.7049	-343.559	-95.7045	-247.847	-247.848	-95.7049	-343.558	-95.7045	-247.847	-247.848
66_MeNH2-Pyridine_1.00_dimer.out	-343.559	-95.7045	-247.847	-247.848	-95.7049	-343.557	-95.7046	-247.847	-247.847	-95.7047	-343.558	-95.7045	-247.847	-247.847	-95.7048	-343.558	-95.7046	-247.847	-247.847	-95.7049	-343.557	-95.7046	-247.846	-247.847	-95.705	-343.558	-95.7046	-247.847	-247.848	-95.7049	-343.559	-95.7045	-247.847	-247.848	-95.7048	-343.559	-95.7045	-247.847	-247.848	-95.7049	-343.559	-95.7045	-247.847	-247.848	-95.7049	-343.559	-95.7045	-247.847	-247.848
66_MeNH2-Pyridine_1.05_dimer.out	-343.558	-95.7045	-247.847	-247.848	-95.7048	-343.557	-95.7046	-247.847	-247.847	-95.7047	-343.557	-95.7045	-247.847	-247.847	-95.7047	-343.558	-95.7046	-247.847	-247.847	-95.7049	-343.557	-95.7046	-247.846	-247.847	-95.7049	-343.558	-95.7046	-247.847	-247.848	-95.7049	-343.559	-95.7045	-247.847	-247.848	-95.7048	-343.559	-95.7045	-247.847	-247.848	-95.7048	-343.558	-95.7045	-247.847	-247.848	-95.7048	-343.558	-95.7045	-247.847	-247.848
66_MeNH2-Pyridine_1.10_dimer.out	-343.558	-95.7045	-247.847	-247.848	-95.7048	-343.557	-95.7046	-247.847	-247.847	-95.7047	-343.557	-95.7045	-247.847	-247.847	-95.7047	-343.557	-95.7046	-247.847	-247.847	-95.7048	-343.557	-95.7046	-247.846	-247.847	-95.7049	-343.558	-95.7046	-247.847	-247.848	-95.7048	-343.558	-95.7045	-247.847	-247.848	-95.7047	-343.558	-95.7045	-247.847	-247.848	-95.7048	-343.558	-95.7045	-247.847	-247.848	-95.7048	-343.558	-95.7045	-247.847	-247.848
66_MeNH2-Pyridine_1.25_dimer.out	-343.556	-95.7045	-247.847	-247.848	-95.7047	-343.555	-95.7046	-247.847	-247.847	-95.7046	-343.556	-95.7045	-247.847	-247.847	-95.7046	-343.556	-95.7046	-247.847	-247.847	-95.7047	-343.555	-95.7046	-247.846	-247.847	-95.7048	-343.556	-95.7046	-247.847	-247.847	-95.7048	-343.557	-95.7045	-247.847	-247.848	-95.7046	-343.557	-95.7045	-247.847	-247.848	-95.7047	-343.557	-95.7045	-247.847	-247.848	-95.7047	-343.556	-95.7045	-247.847	-247.848
66_MeNH2-Pyridine_1.50_dimer.out	-343.554	-95.7045	-247.847	-247.847	-95.7046	-343.553	-95.7046	-247.847	-247.847	-95.7046	-343.554	-95.7045	-247.847	-247.847	-95.7045	-343.554	-95.7046	-247.847	-247.847	-95.7046	-343.554	-95.7046	-247.846	-247.847	-95.7047	-343.554	-95.7046	-247.847	-247.847	-95.7047	-343.555	-95.7045	-247.847	-247.847	-95.7045	-343.555	-95.7045	-247.847	-247.848	-95.7046	-343.555	-95.7045	-247.847	-247.848	-95.7046	-343.554	-95.7045	-247.847	-247.847
66_MeNH2-Pyridine_2.00_dimer.out	-343.553	-95.7045	-247.847	-247.847	-95.7046	-343.552	-95.7046	-247.847	-247.847	-95.7046	-343.552	-95.7045	-247.847	-247.847	-95.7045	-343.552	-95.7046	-247.847	-247.847	-95.7046	-343.552	-95.7046	-247.846	-247.846	-95.7047	-343.553	-95.7046	-247.847	-247.847	-95.7046	-343.553	-95.7045	-247.847	-247.847	-95.7045	-343.553	-95.7045	-247.847	-247.847	-95.7045	-343.553	-95.7045	-247.847	-247.847	-95.7046	-343.553	-95.7045	-247.847	-247.847
[truncated: 68 more columns]

## Sheet: HLC S66x8 haVDZ
																																								RMSD	0.148215	0.107066	0.123693
dimers					monomersA					monomersB					cpA					cpB						raw					CP					∆CP					HLC: CCSD(T) - MP2					∆Ecorr
Name	Escf	Emp2	Eccsd	Eccsd(t)	Name	Escf	Emp2	Eccsd	Eccsd(t)	Name	Escf	Emp2	Eccsd	Eccsd(t)	Name	Escf	Emp2	Eccsd	Eccsd(t)	Name	Escf	Emp2	Eccsd	Eccsd(t)		HF	MP2	CCSD	CCSD(T)		HF	MP2	CCSD	CCSD(T)		HF	MP2	CCSD	CCSD(T)		raw	CP	half	STERLING		raw	CP	half	STERLING
01_Water-Water_0.90_dimer.out	-152.086	-152.525	-152.541	-152.551	01_Water-Water_1.00_monomerA.out	-76.0406	-76.2589	-76.2669	-76.2718	01_Water-Water_1.00_monomerB.out	-76.0407	-76.2589	-76.2669	-76.2718	01_Water-Water_0.90_cpA.out	-76.0412	-76.2599	-76.2678	-76.2729	01_Water-Water_0.90_cpB.out	-76.0407	-76.2593	-76.2673	-76.2723		3.19438	4.76936	4.37612	4.69337		2.85697	3.85931	3.51042	3.72151		0.337411	0.910054	0.865693	0.971861	01_Water-Water_0.90_dimer.out	-0.0759965	-0.137803	-0.1069	-0.0123965		1.49899	0.864538	1.18176
01_Water-Water_0.95_dimer.out	-152.087	-152.526	-152.541	-152.552	01_Water-Water_1.00_monomerA.out	-76.0406	-76.2589	-76.2669	-76.2718	01_Water-Water_1.00_monomerB.out	-76.0407	-76.2589	-76.2669	-76.2718	01_Water-Water_0.95_cpA.out	-76.0411	-76.2597	-76.2677	-76.2727	01_Water-Water_0.95_cpB.out	-76.0407	-76.2592	-76.2672	-76.2722		3.80601	5.08755	4.77728	5.04428		3.5183	4.32992	4.05505	4.23066		0.287712	0.757629	0.722228	0.813613	01_Water-Water_0.95_dimer.out	-0.0432748	-0.099259	-0.0712669	0.00636817		1.23827	0.712365	0.975315
01_Water-Water_1.00_dimer.out	-152.088	-152.526	-152.541	-152.552	01_Water-Water_1.00_monomerA.out	-76.0406	-76.2589	-76.2669	-76.2718	01_Water-Water_1.00_monomerB.out	-76.0407	-76.2589	-76.2669	-76.2718	01_Water-Water_1.00_cpA.out	-76.041	-76.2596	-76.2676	-76.2726	01_Water-Water_1.00_cpB.out	-76.0406	-76.2592	-76.2671	-76.2721		4.05833	5.10492	4.85779	5.08143		3.81945	4.47171	4.25371	4.39812		0.238875	0.633207	0.604081	0.683314	01_Water-Water_1.00_dimer.out	-0.0234886	-0.0735957	-0.0485421	0.0156933		1.0231	0.578663	0.800882
01_Water-Water_1.05_dimer.out	-152.088	-152.526	-152.541	-152.551	01_Water-Water_1.00_monomerA.out	-76.0406	-76.2589	-76.2669	-76.2718	01_Water-Water_1.00_monomerB.out	-76.0407	-76.2589	-76.2669	-76.2718	01_Water-Water_1.05_cpA.out	-76.041	-76.2595	-76.2675	-76.2724	01_Water-Water_1.05_cpB.out	-76.0406	-76.2591	-76.2671	-76.2721		4.08544	4.94526	4.74611	4.93309		3.88796	4.40869	4.23426	4.35177		0.19748	0.536561	0.511853	0.581314	01_Water-Water_1.05_dimer.out	-0.0121693	-0.0569223	-0.0345458	0.018808		0.847647	0.463813	0.65573
01_Water-Water_1.10_dimer.out	-152.088	-152.525	-152.541	-152.551	01_Water-Water_1.00_monomerA.out	-76.0406	-76.2589	-76.2669	-76.2718	01_Water-Water_1.00_monomerB.out	-76.0407	-76.2589	-76.2669	-76.2718	01_Water-Water_1.10_cpA.out	-76.041	-76.2594	-76.2674	-76.2724	01_Water-Water_1.10_cpB.out	-76.0406	-76.2591	-76.2671	-76.272		3.97614	4.68784	4.52525	4.68182		3.80853	4.22241	4.08121	4.17609		0.167612	0.465438	0.444037	0.505727	01_Water-Water_1.10_dimer.out	-0.00602264	-0.0463119	-0.0261673	0.0181686		0.705683	0.367568	0.536626
01_Water-Water_1.25_dimer.out	-152.087	-152.524	-152.54	-152.55	01_Water-Water_1.00_monomerA.out	-76.0406	-76.2589	-76.2669	-76.2718	01_Water-Water_1.00_monomerB.out	-76.0407	-76.2589	-76.2669	-76.2718	01_Water-Water_1.25_cpA.out	-76.0409	-76.2593	-76.2673	-76.2722	01_Water-Water_1.25_cpB.out	-76.0406	-76.259	-76.267	-76.2719		3.30695	3.72755	3.6317	3.7256		3.1821	3.38592	3.30512	3.35333		0.124846	0.341628	0.326579	0.372267	01_Water-Water_1.25_dimer.out	-0.0019488	-0.032588	-0.0172684	0.00838054		0.418648	0.171227	0.294938
01_Water-Water_1.50_dimer.out	-152.085	-152.522	-152.537	-152.547	01_Water-Water_1.00_monomerA.out	-76.0406	-76.2589	-76.2669	-76.2718	01_Water-Water_1.00_monomerB.out	-76.0407	-76.2589	-76.2669	-76.2718	01_Water-Water_1.50_cpA.out	-76.0408	-76.2592	-76.2671	-76.2721	01_Water-Water_1.50_cpB.out	-76.0406	-76.2589	-76.2669	-76.2719		2.1635	2.35702	2.3066	2.34936		2.08753	2.14373	2.10335	2.11733		0.0759671	0.213288	0.20325	0.232031	01_Water-Water_1.50_dimer.out	-0.00765761	-0.0264005	-0.017029	-0.00426473		0.185868	0.0298039	0.107836
01_Water-Water_2.00_dimer.out	-152.083	-152.519	-152.535	-152.545	01_Water-Water_1.00_monomerA.out	-76.0406	-76.2589	-76.2669	-76.2718	01_Water-Water_1.00_monomerB.out	-76.0407	-76.2589	-76.2669	-76.2718	01_Water-Water_2.00_cpA.out	-76.0408	-76.259	-76.267	-76.2719	01_Water-Water_2.00_cpB.out	-76.0406	-76.2589	-76.2669	-76.2718		0.980788	1.01809	0.996677	1.00461		0.947824	0.938827	0.922254	0.921559		0.0329638	0.0792614	0.0744231	0.0830488	01_Water-Water_2.00_dimer.out	-0.0134808	-0.0172682	-0.0153745	-0.00809155		0.0238203	-0.0262647	-0.00122224
02_Water-MeOH_0.90_dimer.out	-191.106	-191.686	-191.717	-191.732	02_Water-MeOH_1.00_monomerA.out	-76.0405	-76.2589	-76.2669	-76.2718	02_Water-MeOH_1.00_monomerB.out	-115.061	-115.418	-115.442	-115.452	02_Water-MeOH_0.90_cpA.out	-115.061	-115.419	-115.443	-115.453	02_Water-MeOH_0.90_cpB.out	-76.0407	-76.2596	-76.2676	-76.2726		3.04351	5.3912	4.81652	5.22728		2.70133	4.33045	3.81171	4.09823		0.342178	1.06075	1.00481	1.12905	02_Water-MeOH_0.90_dimer.out	-0.163916	-0.232217	-0.198067	-0.0961224		2.18377	1.3969	1.79033
02_Water-MeOH_0.95_dimer.out	-191.107	-191.686	-191.717	-191.733	02_Water-MeOH_1.00_monomerA.out	-76.0405	-76.2589	-76.2669	-76.2718	02_Water-MeOH_1.00_monomerB.out	-115.061	-115.418	-115.442	-115.452	02_Water-MeOH_0.95_cpA.out	-115.061	-115.419	-115.443	-115.453	02_Water-MeOH_0.95_cpB.out	-76.0407	-76.2595	-76.2675	-76.2725		3.7831	5.73582	5.27247	5.62283		3.4882	4.85832	4.43914	4.68343		0.294899	0.877495	0.833331	0.9394	02_Water-MeOH_0.95_dimer.out	-0.11298	-0.174885	-0.143933	-0.0611543		1.83974	1.19524	1.51749
02_Water-MeOH_1.00_dimer.out	-191.108	-191.686	-191.718	-191.733	02_Water-MeOH_1.00_monomerA.out	-76.0405	-76.2589	-76.2669	-76.2718	02_Water-MeOH_1.00_monomerB.out	-115.061	-115.418	-115.442	-115.452	02_Water-MeOH_1.00_cpA.out	-115.061	-115.419	-115.443	-115.453	02_Water-MeOH_1.00_cpB.out	-76.0407	-76.2594	-76.2674	-76.2724		4.11839	5.7438	5.36852	5.66524		3.87195	5.0181	4.67813	4.88407		0.246446	0.725701	0.690385	0.781168	02_Water-MeOH_1.00_dimer.out	-0.0785546	-0.134021	-0.106288	-0.0386005		1.54685	1.01213	1.27949
02_Water-MeOH_1.05_dimer.out	-191.108	-191.686	-191.717	-191.733	02_Water-MeOH_1.00_monomerA.out	-76.0405	-76.2589	-76.2669	-76.2718	02_Water-MeOH_1.00_monomerB.out	-115.061	-115.418	-115.442	-115.452	02_Water-MeOH_1.05_cpA.out	-115.061	-115.419	-115.443	-115.453	02_Water-MeOH_1.05_cpB.out	-76.0407	-76.2593	-76.2673	-76.2723		4.19416	5.55076	5.24475	5.49483		3.99277	4.94747	4.6702	4.84208		0.201383	0.60329	0.574554	0.65275	02_Water-MeOH_1.05_dimer.out	-0.0559278	-0.105388	-0.080658	-0.024708		1.30067	0.849306	1.07499
02_Water-MeOH_1.10_dimer.out	-191.108	-191.686	-191.717	-191.732	02_Water-MeOH_1.00_monomerA.out	-76.0405	-76.2589	-76.2669	-76.2718	02_Water-MeOH_1.00_monomerB.out	-115.061	-115.418	-115.442	-115.452	02_Water-MeOH_1.10_cpA.out	-115.061	-115.419	-115.443	-115.453	02_Water-MeOH_1.10_cpB.out	-76.0406	-76.2593	-76.2672	-76.2722		4.1091	5.24612	4.9945	5.20487		3.94426	4.73763	4.50965	4.652		0.164845	0.508492	0.484856	0.552872	02_Water-MeOH_1.10_dimer.out	-0.0412478	-0.0856275	-0.0634376	-0.0169167		1.09577	0.707741	0.901754
02_Water-MeOH_1.25_dimer.out	-191.107	-191.684	-191.715	-191.731	02_Water-MeOH_1.00_monomerA.out	-76.0405	-76.2589	-76.2669	-76.2718	02_Water-MeOH_1.00_monomerB.out	-115.061	-115.418	-115.442	-115.452	02_Water-MeOH_1.25_cpA.out	-115.061	-115.419	-115.442	-115.453	02_Water-MeOH_1.25_cpB.out	-76.0406	-76.2591	-76.2671	-76.2721		3.44157	4.12654	3.97964	4.10534		3.33384	3.78727	3.65354	3.73182		0.107731	0.339269	0.326101	0.37352	02_Water-MeOH_1.25_dimer.out	-0.0211988	-0.0554494	-0.0383241	-0.0111566		0.663772	0.397983	0.530878
02_Water-MeOH_1.50_dimer.out	-191.105	-191.681	-191.713	-191.728	02_Water-MeOH_1.00_monomerA.out	-76.0405	-76.2589	-76.2669	-76.2718	02_Water-MeOH_1.00_monomerB.out	-115.061	-115.418	-115.442	-115.452	02_Water-MeOH_1.50_cpA.out	-115.061	-115.419	-115.442	-115.452	02_Water-MeOH_1.50_cpB.out	-76.0406	-76.259	-76.267	-76.2719		2.23456	2.5477	2.47681	2.53177		2.17854	2.35908	2.2941	2.32107		0.056016	0.188623	0.182705	0.210697	02_Water-MeOH_1.50_dimer.out	-0.0159298	-0.0380044	-0.0269671	-0.0142856		0.297213	0.142532	0.219873
02_Water-MeOH_2.00_dimer.out	-191.103	-191.679	-191.711	-191.726	02_Water-MeOH_1.00_monomerA.out	-76.0405	-76.2589	-76.2669	-76.2718	02_Water-MeOH_1.00_monomerB.out	-115.061	-115.418	-115.442	-115.452	02_Water-MeOH_2.00_cpA.out	-115.061	-115.418	-115.442	-115.452	02_Water-MeOH_2.00_cpB.out	-76.0405	-76.2589	-76.2669	-76.2718		0.984076	1.04951	1.02454	1.03416		0.964253	0.987935	0.964771	0.96579		0.0198228	0.0615771	0.0597651	0.0683742	02_Water-MeOH_2.00_dimer.out	-0.0153471	-0.0221442	-0.0187457	-0.0130567		0.050089	0.00153758	0.0258133
03_Water-MeNH2_0.90_dimer.out	-171.276	-171.839	-171.876	-171.892	03_Water-MeNH2_1.00_monomerA.out	-76.0403	-76.2589	-76.2668	-76.2718	03_Water-MeNH2_1.00_monomerB.out	-95.2298	-95.5694	-95.5994	-95.6097	03_Water-MeNH2_0.90_cpA.out	-95.2301	-95.5705	-95.6004	-95.6108	03_Water-MeNH2_0.90_cpB.out	-76.0405	-76.2596	-76.2675	-76.2726		3.86888	6.71047	5.94155	6.42686		3.49614	5.5664	4.87116	5.23038		0.372745	1.14406	1.0704	1.19649	03_Water-MeNH2_0.90_dimer.out	-0.283604	-0.336029	-0.309816	-0.194601		2.55798	1.73424	2.14611
03_Water-MeNH2_0.95_dimer.out	-171.278	-171.84	-171.876	-171.892	03_Water-MeNH2_1.00_monomerA.out	-76.0403	-76.2589	-76.2668	-76.2718	03_Water-MeNH2_1.00_monomerB.out	-95.2298	-95.5694	-95.5994	-95.6097	03_Water-MeNH2_0.95_cpA.out	-95.2301	-95.5704	-95.6002	-95.6106	03_Water-MeNH2_0.95_cpB.out	-76.0405	-76.2595	-76.2674	-76.2724		4.68741	7.07207	6.44338	6.86398		4.3492	6.09851	5.52833	5.8411		0.338208	0.973559	0.915059	1.02288	03_Water-MeNH2_0.95_dimer.out	-0.208089	-0.257412	-0.23275	-0.137075		2.17657	1.49189	1.83423
03_Water-MeNH2_1.00_dimer.out	-171.278	-171.84	-171.877	-171.892	03_Water-MeNH2_1.00_monomerA.out	-76.0403	-76.2589	-76.2668	-76.2718	03_Water-MeNH2_1.00_monomerB.out	-95.2298	-95.5694	-95.5994	-95.6097	03_Water-MeNH2_1.00_cpA.out	-95.2301	-95.5702	-95.6001	-95.6105	03_Water-MeNH2_1.00_cpB.out	-76.0404	-76.2594	-76.2673	-76.2723		5.06623	7.06562	6.55158	6.91345		4.76467	6.23823	5.77018	6.03995		0.301555	0.827389	0.781406	0.873496	03_Water-MeNH2_1.00_dimer.out	-0.152167	-0.198274	-0.175221	-0.0960963		1.84722	1.27528	1.56125
03_Water-MeNH2_1.05_dimer.out	-171.278	-171.839	-171.876	-171.892	03_Water-MeNH2_1.00_monomerA.out	-76.0403	-76.2589	-76.2668	-76.2718	03_Water-MeNH2_1.00_monomerB.out	-95.2298	-95.5694	-95.5994	-95.6097	03_Water-MeNH2_1.05_cpA.out	-95.2301	-95.5701	-95.6	-95.6104	03_Water-MeNH2_1.05_cpB.out	-76.0404	-76.2593	-76.2672	-76.2723		5.15299	6.83128	6.40969	6.71923		4.89016	6.12878	5.74359	5.97431		0.262835	0.7025	0.666099	0.744923	03_Water-MeNH2_1.05_dimer.out	-0.112045	-0.154467	-0.133256	-0.0678059		1.56624	1.08415	1.3252
03_Water-MeNH2_1.10_dimer.out	-171.278	-171.839	-171.876	-171.892	03_Water-MeNH2_1.00_monomerA.out	-76.0403	-76.2589	-76.2668	-76.2718	03_Water-MeNH2_1.00_monomerB.out	-95.2298	-95.5694	-95.5994	-95.6097	03_Water-MeNH2_1.10_cpA.out	-95.23	-95.57	-95.5999	-95.6103	03_Water-MeNH2_1.10_cpB.out	-76.0404	-76.2592	-76.2672	-76.2722		5.05173	6.4653	6.11733	6.3812		4.82628	5.86693	5.54834	5.74433		0.225447	0.59837	0.568991	0.636868	03_Water-MeNH2_1.10_dimer.out	-0.0840998	-0.122597	-0.103348	-0.0490107		1.32947	0.918052	1.12376
03_Water-MeNH2_1.25_dimer.out	-171.277	-171.836	-171.874	-171.889	03_Water-MeNH2_1.00_monomerA.out	-76.0403	-76.2589	-76.2668	-76.2718	03_Water-MeNH2_1.00_monomerB.out	-95.2298	-95.5694	-95.5994	-95.6097	03_Water-MeNH2_1.25_cpA.out	-95.2299	-95.5698	-95.5997	-95.6101	03_Water-MeNH2_1.25_cpB.out	-76.0403	-76.2591	-76.267	-76.272		4.24619	5.11118	4.90595	5.06804		4.09657	4.71688	4.52895	4.64563		0.149611	0.394304	0.377005	0.422406	03_Water-MeNH2_1.25_dimer.out	-0.043148	-0.0712507	-0.0571994	-0.0251709		0.821851	0.549055	0.685453
03_Water-MeNH2_1.50_dimer.out	-171.274	-171.833	-171.871	-171.886	03_Water-MeNH2_1.00_monomerA.out	-76.0403	-76.2589	-76.2668	-76.2718	03_Water-MeNH2_1.00_monomerB.out	-95.2298	-95.5694	-95.5994	-95.6097	03_Water-MeNH2_1.50_cpA.out	-95.2299	-95.5697	-95.5996	-95.6099	03_Water-MeNH2_1.50_cpB.out	-76.0403	-76.259	-76.2669	-76.2719		2.7527	3.1649	3.06447	3.13723		2.66346	2.93843	2.84715	2.89424		0.0892356	0.226471	0.217312	0.242983	03_Water-MeNH2_1.50_dimer.out	-0.0276736	-0.0441852	-0.0359294	-0.0203291		0.38453	0.230783	0.307657
03_Water-MeNH2_2.00_dimer.out	-171.272	-171.83	-171.868	-171.883	03_Water-MeNH2_1.00_monomerA.out	-76.0403	-76.2589	-76.2668	-76.2718	03_Water-MeNH2_1.00_monomerB.out	-95.2298	-95.5694	-95.5994	-95.6097	03_Water-MeNH2_2.00_cpA.out	-95.2298	-95.5695	-95.5994	-95.6097	03_Water-MeNH2_2.00_cpB.out	-76.0403	-76.2589	-76.2669	-76.2718		1.15716	1.2673	1.23028	1.24592		1.12293	1.18889	1.1552	1.16273		0.0342285	0.0784126	0.0750873	0.0831906	03_Water-MeNH2_2.00_dimer.out	-0.0213762	-0.0261542	-0.0237652	-0.018421		0.088767	0.0398049	0.064286
04_Water-Peptide_0.90_dimer.out	-323.088	-324.112	-324.162	-324.197	04_Water-Peptide_1.00_monomerA.out	-76.0403	-76.2589	-76.2668	-76.2718	04_Water-Peptide_1.00_monomerB.out	-247.04	-247.841	-247.883	-247.914	04_Water-Peptide_0.90_cpA.out	-247.04	-247.842	-247.884	-247.915	04_Water-Peptide_0.90_cpB.out	-76.0408	-76.2601	-76.268	-76.2731		5.02046	7.57977	7.07099	7.55439		4.57526	6.20787	5.77806	6.11479		0.445202	1.3719	1.29293	1.4396	04_Water-Peptide_0.90_dimer.out	-0.0253782	-0.0930823	-0.0592303	0.043454		2.53393	1.53953	2.03673
04_Water-Peptide_0.95_dimer.out	-323.09	-324.112	-324.162	-324.198	04_Water-Peptide_1.00_monomerA.out	-76.0403	-76.2589	-76.2668	-76.2718	04_Water-Peptide_1.00_monomerB.out	-247.04	-247.841	-247.883	-247.914	04_Water-Peptide_0.95_cpA.out	-247.04	-247.842	-247.884	-247.914	04_Water-Peptide_0.95_cpB.out	-76.0407	-76.2599	-76.2678	-76.2729		5.85154	8.0191	7.61279	8.03626		5.45398	6.85171	6.50944	6.8057		0.397557	1.16739	1.10336	1.23056	04_Water-Peptide_0.95_dimer.out	0.0171625	-0.0460079	-0.0144227	0.0676959		2.18472	1.35172	1.76822
04_Water-Peptide_1.00_dimer.out	-323.09	-324.112	-324.163	-324.198	04_Water-Peptide_1.00_monomerA.out	-76.0403	-76.2589	-76.2668	-76.2718	04_Water-Peptide_1.00_monomerB.out	-247.04	-247.841	-247.883	-247.914	04_Water-Peptide_1.00_cpA.out	-247.04	-247.841	-247.884	-247.914	04_Water-Peptide_1.00_cpB.out	-76.0407	-76.2598	-76.2677	-76.2728		6.22505	8.05783	7.73418	8.1023		5.87554	7.06182	6.79045	7.04803		0.3495	0.996002	0.943729	1.05426	04_Water-Peptide_1.00_dimer.out	0.0444741	-0.0137886	0.0153428	0.0811575		1.87725	1.17249	1.52487
04_Water-Peptide_1.05_dimer.out	-323.09	-324.112	-324.162	-324.198	04_Water-Peptide_1.00_monomerA.out	-76.0403	-76.2589	-76.2668	-76.2718	04_Water-Peptide_1.00_monomerB.out	-247.04	-247.841	-247.883	-247.914	04_Water-Peptide_1.05_cpA.out	-247.04	-247.841	-247.884	-247.914	04_Water-Peptide_1.05_cpB.out	-76.0406	-76.2597	-76.2676	-76.2727		6.29593	7.84617	7.58813	7.90633		5.99456	6.99357	6.77888	7.00051		0.301371	0.852602	0.809249	0.905819	04_Water-Peptide_1.05_dimer.out	0.0601563	0.00693996	0.0335481	0.0866668		1.61039	1.00594	1.30817
04_Water-Peptide_1.10_dimer.out	-323.09	-324.112	-324.162	-324.197	04_Water-Peptide_1.00_monomerA.out	-76.0403	-76.2589	-76.2668	-76.2718	04_Water-Peptide_1.00_monomerB.out	-247.04	-247.841	-247.883	-247.914	04_Water-Peptide_1.10_cpA.out	-247.04	-247.841	-247.884	-247.914	04_Water-Peptide_1.10_cpB.out	-76.0406	-76.2596	-76.2675	-76.2726		6.17296	7.48675	7.28019	7.55439		5.9156	6.75169	6.58165	6.77078		0.257361	0.735056	0.698536	0.783611	04_Water-Peptide_1.10_dimer.out	0.0676425	0.0190879	0.0433652	0.0867113		1.38143	0.855182	1.11831
04_Water-Peptide_1.25_dimer.out	-323.089	-324.109	-324.16	-324.195	04_Water-Peptide_1.00_monomerA.out	-76.0403	-76.2589	-76.2668	-76.2718	04_Water-Peptide_1.00_monomerB.out	-247.04	-247.841	-247.883	-247.914	04_Water-Peptide_1.25_cpA.out	-247.04	-247.841	-247.884	-247.914	04_Water-Peptide_1.25_cpB.out	-76.0405	-76.2594	-76.2673	-76.2723		5.28258	6.08756	5.97917	6.15337		5.10803	5.58159	5.49566	5.6088		0.174546	0.505973	0.483511	0.544574	04_Water-Peptide_1.25_dimer.out	0.0658121	0.0272118	0.0465119	0.0718333		0.870795	0.500768	0.685782
04_Water-Peptide_1.50_dimer.out	-323.086	-324.106	-324.157	-324.192	04_Water-Peptide_1.00_monomerA.out	-76.0403	-76.2589	-76.2668	-76.2718	04_Water-Peptide_1.00_monomerB.out	-247.04	-247.841	-247.883	-247.914	04_Water-Peptide_1.50_cpA.out	-247.04	-247.841	-247.884	-247.914	04_Water-Peptide_1.50_cpB.out	-76.0405	-76.2592	-76.2671	-76.2721		3.61034	3.96746	3.92789	4.00985		3.50878	3.66701	3.63842	3.68236		0.101555	0.300447	0.289467	0.327489	04_Water-Peptide_1.50_dimer.out	0.0423867	0.0153446	0.0288656	0.0425981		0.399508	0.173574	0.286541
04_Water-Peptide_2.00_dimer.out	-323.083	-324.102	-324.153	-324.188	04_Water-Peptide_1.00_monomerA.out	-76.0403	-76.2589	-76.2668	-76.2718	04_Water-Peptide_1.00_monomerB.out	-247.04	-247.841	-247.883	-247.914	04_Water-Peptide_2.00_cpA.out	-247.04	-247.841	-247.883	-247.914	04_Water-Peptide_2.00_cpB.out	-76.0404	-76.259	-76.2669	-76.2719		1.5135	1.54697	1.54463	1.55756		1.4819	1.44542	1.44593	1.44594		0.0316094	0.101548	0.098707	0.11162	04_Water-Peptide_2.00_dimer.out	0.0105916	0.000519459	0.00555551	0.0121923		0.044055	-0.0359553	0.00404984
05_MeOH-MeOH_0.90_dimer.out	-230.125	-230.846	-230.892	-230.913	05_MeOH-MeOH_1.00_monomerA.out	-115.06	-115.418	-115.442	-115.452	05_MeOH-MeOH_1.00_monomerB.out	-115.061	-115.418	-115.442	-115.452	05_MeOH-MeOH_0.90_cpA.out	-115.061	-115.42	-115.443	-115.453	05_MeOH-MeOH_0.90_cpB.out	-115.061	-115.419	-115.443	-115.453		2.6595	5.58727	4.92693	5.42853		2.29037	4.36705	3.77392	4.14554		0.369136	1.22022	1.15301	1.28299	05_MeOH-MeOH_0.90_dimer.out	-0.158739	-0.221508	-0.190124	-0.0881789		2.76903	1.85518	2.3121
05_MeOH-MeOH_0.95_dimer.out	-230.127	-230.846	-230.893	-230.914	05_MeOH-MeOH_1.00_monomerA.out	-115.06	-115.418	-115.442	-115.452	05_MeOH-MeOH_1.00_monomerB.out	-115.061	-115.418	-115.442	-115.452	05_MeOH-MeOH_0.95_cpA.out	-115.061	-115.419	-115.443	-115.453	05_MeOH-MeOH_0.95_cpB.out	-115.061	-115.419	-115.443	-115.453		3.50681	5.97059	5.43716	5.86789		3.18069	4.9438	4.46542	4.78558		0.326117	1.02679	0.971738	1.08231	05_MeOH-MeOH_0.95_dimer.out	-0.102698	-0.158223	-0.130461	-0.0481989		2.36108	1.60488	1.98298
05_MeOH-MeOH_1.00_dimer.out	-230.127	-230.846	-230.893	-230.914	05_MeOH-MeOH_1.00_monomerA.out	-115.06	-115.418	-115.442	-115.452	05_MeOH-MeOH_1.00_monomerB.out	-115.061	-115.418	-115.442	-115.452	05_MeOH-MeOH_1.00_cpA.out	-115.061	-115.419	-115.443	-115.453	05_MeOH-MeOH_1.00_cpB.out	-115.061	-115.419	-115.443	-115.453		3.927	6.00153	5.56905	5.93652		3.64492	5.13612	4.74922	5.02262		0.28208	0.865406	0.819833	0.913899	05_MeOH-MeOH_1.00_dimer.out	-0.0650119	-0.113505	-0.0892585	-0.0224234		2.00952	1.3777	1.69361
05_MeOH-MeOH_1.05_dimer.out	-230.128	-230.846	-230.893	-230.914	05_MeOH-MeOH_1.00_monomerA.out	-115.06	-115.418	-115.442	-115.452	05_MeOH-MeOH_1.00_monomerB.out	-115.061	-115.418	-115.442	-115.452	05_MeOH-MeOH_1.05_cpA.out	-115.061	-115.419	-115.443	-115.453	05_MeOH-MeOH_1.05_cpB.out	-115.061	-115.419	-115.442	-115.453		4.06808	5.81883	5.46609	5.77817		3.82867	5.08639	4.77198	5.00369		0.239405	0.732433	0.694109	0.774478	05_MeOH-MeOH_1.05_dimer.out	-0.0406593	-0.0827039	-0.0616816	-0.00698064		1.71009	1.17502	1.44255
05_MeOH-MeOH_1.10_dimer.out	-230.128	-230.845	-230.892	-230.913	05_MeOH-MeOH_1.00_monomerA.out	-115.06	-115.418	-115.442	-115.452	05_MeOH-MeOH_1.00_monomerB.out	-115.061	-115.418	-115.442	-115.452	05_MeOH-MeOH_1.10_cpA.out	-115.061	-115.419	-115.443	-115.453	05_MeOH-MeOH_1.10_cpB.out	-115.061	-115.419	-115.442	-115.453		4.03151	5.51446	5.22445	5.48898		3.82926	4.88904	4.63164	4.82694		0.20225	0.625418	0.592814	0.662044	05_MeOH-MeOH_1.10_dimer.out	-0.0254799	-0.0621063	-0.0437931	0.00128762		1.45747	0.997672	1.22757
05_MeOH-MeOH_1.25_dimer.out	-230.127	-230.844	-230.891	-230.911	05_MeOH-MeOH_1.00_monomerA.out	-115.06	-115.418	-115.442	-115.452	05_MeOH-MeOH_1.00_monomerB.out	-115.061	-115.418	-115.442	-115.452	05_MeOH-MeOH_1.25_cpA.out	-115.061	-115.419	-115.443	-115.453	05_MeOH-MeOH_1.25_cpB.out	-115.061	-115.419	-115.442	-115.452		3.44187	4.36066	4.19125	4.35252		3.30761	3.94336	3.79443	3.90899		0.13426	0.417298	0.396818	0.443533	05_MeOH-MeOH_1.25_dimer.out	-0.00813072	-0.0343655	-0.0212481	0.00467452		0.910657	0.601383	0.75602
05_MeOH-MeOH_1.50_dimer.out	-230.125	-230.841	-230.888	-230.909	05_MeOH-MeOH_1.00_monomerA.out	-115.06	-115.418	-115.442	-115.452	05_MeOH-MeOH_1.00_monomerB.out	-115.061	-115.418	-115.442	-115.452	05_MeOH-MeOH_1.50_cpA.out	-115.061	-115.419	-115.442	-115.452	05_MeOH-MeOH_1.50_cpB.out	-115.06	-115.418	-115.442	-115.452		2.26509	2.70172	2.6197	2.69261		2.19271	2.47258	2.40109	2.44699		0.0723794	0.229145	0.21861	0.245613	05_MeOH-MeOH_1.50_dimer.out	-0.00911524	-0.0255839	-0.0173496	-0.00533744		0.427515	0.254281	0.340898
05_MeOH-MeOH_2.00_dimer.out	-230.123	-230.838	-230.886	-230.906	05_MeOH-MeOH_1.00_monomerA.out	-115.06	-115.418	-115.442	-115.452	05_MeOH-MeOH_1.00_monomerB.out	-115.061	-115.418	-115.442	-115.452	05_MeOH-MeOH_2.00_cpA.out	-115.061	-115.419	-115.442	-115.452	05_MeOH-MeOH_2.00_cpB.out	-115.06	-115.418	-115.442	-115.452		1.00464	1.11609	1.08681	1.10304		0.975691	1.03367	1.00811	1.01489		0.0289461	0.0824165	0.0786927	0.0881511	05_MeOH-MeOH_2.00_dimer.out	-0.0130521	-0.0187867	-0.0159194	-0.0113182		0.0984007	0.0391957	0.0687982
06_MeOH-MeNH2_0.90_dimer.out	-210.295	-210.999	-211.051	-211.073	06_MeOH-MeNH2_1.00_monomerA.out	-115.06	-115.418	-115.442	-115.452	06_MeOH-MeNH2_1.00_monomerB.out	-95.2298	-95.5694	-95.5994	-95.6097	06_MeOH-MeNH2_0.90_cpA.out	-95.2302	-95.571	-95.6008	-95.6112	06_MeOH-MeNH2_0.90_cpB.out	-115.06	-115.419	-115.443	-115.453		3.09037	7.46622	6.43502	7.13912		2.63543	5.89977	4.97472	5.52379		0.45494	1.56645	1.4603	1.61533	06_MeOH-MeNH2_0.90_dimer.out	-0.327105	-0.375987	-0.351546	-0.232824		4.04874	2.88835	3.46855
06_MeOH-MeNH2_0.95_dimer.out	-210.296	-211	-211.052	-211.074	06_MeOH-MeNH2_1.00_monomerA.out	-115.06	-115.418	-115.442	-115.452	06_MeOH-MeNH2_1.00_monomerB.out	-95.2298	-95.5694	-95.5994	-95.6097	06_MeOH-MeNH2_0.95_cpA.out	-95.2302	-95.5708	-95.6006	-95.611	06_MeOH-MeNH2_0.95_cpB.out	-115.06	-115.419	-115.443	-115.453		4.19245	7.92023	7.07072	7.68759		3.7793	6.57129	5.80973	6.29268		0.413149	1.34894	1.26099	1.39491	06_MeOH-MeNH2_0.95_dimer.out	-0.232638	-0.278614	-0.255626	-0.159342		3.49514	2.51338	3.00426
06_MeOH-MeNH2_1.00_dimer.out	-210.297	-211	-211.053	-211.074	06_MeOH-MeNH2_1.00_monomerA.out	-115.06	-115.418	-115.442	-115.452	06_MeOH-MeNH2_1.00_monomerB.out	-95.2298	-95.5694	-95.5994	-95.6097	06_MeOH-MeNH2_1.00_cpA.out	-95.2302	-95.5706	-95.6004	-95.6108	06_MeOH-MeNH2_1.00_cpB.out	-115.06	-115.419	-115.442	-115.453		4.77491	7.94647	7.24753	7.78457		4.40409	6.78686	6.16019	6.58201		0.370825	1.15961	1.08734	1.20256	06_MeOH-MeNH2_1.00_dimer.out	-0.161894	-0.204847	-0.183371	-0.105933		3.00966	2.17792	2.59379
06_MeOH-MeNH2_1.05_dimer.out	-210.298	-211	-211.053	-211.074	06_MeOH-MeNH2_1.00_monomerA.out	-115.06	-115.418	-115.442	-115.452	06_MeOH-MeNH2_1.00_monomerB.out	-95.2298	-95.5694	-95.5994	-95.6097	06_MeOH-MeNH2_1.05_cpA.out	-95.2301	-95.5704	-95.6003	-95.6107	06_MeOH-MeNH2_1.05_cpB.out	-115.06	-115.419	-115.442	-115.453		5.00749	7.70631	7.13044	7.59553		4.6802	6.71072	6.19457	6.56065		0.327292	0.995589	0.935871	1.03488	06_MeOH-MeNH2_1.05_dimer.out	-0.110783	-0.150074	-0.130429	-0.0683571		2.58804	1.88045	2.23425
06_MeOH-MeNH2_1.10_dimer.out	-210.298	-210.999	-211.052	-211.073	06_MeOH-MeNH2_1.00_monomerA.out	-115.06	-115.418	-115.442	-115.452	06_MeOH-MeNH2_1.00_monomerB.out	-95.2298	-95.5694	-95.5994	-95.6097	06_MeOH-MeNH2_1.10_cpA.out	-95.2301	-95.5703	-95.6001	-95.6105	06_MeOH-MeNH2_1.10_cpB.out	-115.06	-115.419	-115.442	-115.452		5.00871	7.31027	6.83357	7.23501		4.72401	6.45431	6.02775	6.34388		0.284698	0.855958	0.805821	0.891127	06_MeOH-MeNH2_1.10_dimer.out	-0.0752604	-0.110429	-0.0928447	-0.0430145		2.2263	1.61987	1.92309
06_MeOH-MeNH2_1.25_dimer.out	-210.297	-210.997	-211.05	-211.071	06_MeOH-MeNH2_1.00_monomerA.out	-115.06	-115.418	-115.442	-115.452	06_MeOH-MeNH2_1.00_monomerB.out	-95.2298	-95.5694	-95.5994	-95.6097	06_MeOH-MeNH2_1.25_cpA.out	-95.23	-95.57	-95.5999	-95.6103	06_MeOH-MeNH2_1.25_cpB.out	-115.06	-115.418	-115.442	-115.452		4.34928	5.80075	5.51929	5.77493		4.16063	5.23758	4.98871	5.18808		0.188653	0.563169	0.530583	0.586856	06_MeOH-MeNH2_1.25_dimer.out	-0.0258138	-0.0495008	-0.0376573	-0.0110079		1.42565	1.02745	1.22655
06_MeOH-MeNH2_1.50_dimer.out	-210.294	-210.993	-211.047	-211.067	06_MeOH-MeNH2_1.00_monomerA.out	-115.06	-115.418	-115.442	-115.452	06_MeOH-MeNH2_1.00_monomerB.out	-95.2298	-95.5694	-95.5994	-95.6097	06_MeOH-MeNH2_1.50_cpA.out	-95.2299	-95.5698	-95.5997	-95.61	06_MeOH-MeNH2_1.50_cpB.out	-115.06	-115.418	-115.442	-115.452		2.87965	3.59009	3.45442	3.575		2.76951	3.27821	3.16102	3.25099		0.110138	0.31188	0.293406	0.324009	06_MeOH-MeNH2_1.50_dimer.out	-0.0150976	-0.0272262	-0.0211619	-0.00902079		0.695346	0.481474	0.58841
06_MeOH-MeNH2_2.00_dimer.out	-210.292	-210.99	-211.043	-211.064	06_MeOH-MeNH2_1.00_monomerA.out	-115.06	-115.418	-115.442	-115.452	06_MeOH-MeNH2_1.00_monomerB.out	-95.2298	-95.5694	-95.5994	-95.6097	06_MeOH-MeNH2_2.00_cpA.out	-95.2298	-95.5696	-95.5995	-95.6098	06_MeOH-MeNH2_2.00_cpB.out	-115.06	-115.418	-115.442	-115.452		1.22116	1.4317	1.38403	1.41589		1.17433	1.30986	1.26885	1.28854		0.0468219	0.121834	0.115188	0.127351	06_MeOH-MeNH2_2.00_dimer.out	-0.0158071	-0.0213241	-0.0185656	-0.0156501		0.194732	0.114203	0.154468
07_MeOH-Peptide_0.90_dimer.out	-362.107	-363.271	-363.337	-363.378	07_MeOH-Peptide_1.00_monomerA.out	-115.06	-115.418	-115.442	-115.452	07_MeOH-Peptide_1.00_monomerB.out	-247.04	-247.841	-247.884	-247.914	07_MeOH-Peptide_0.90_cpA.out	-247.041	-247.842	-247.885	-247.915	07_MeOH-Peptide_0.90_cpB.out	-115.061	-115.419	-115.443	-115.453		4.13755	7.68571	6.99681	7.66075		3.69569	6.09077	5.49769	5.999		0.441862	1.59494	1.49912	1.66175	07_MeOH-Peptide_0.90_dimer.out	-0.0249564	-0.0917676	-0.058362	0.0608844		3.5232	2.30331	2.91325
07_MeOH-Peptide_0.95_dimer.out	-362.109	-363.272	-363.338	-363.379	07_MeOH-Peptide_1.00_monomerA.out	-115.06	-115.418	-115.442	-115.452	07_MeOH-Peptide_1.00_monomerB.out	-247.04	-247.841	-247.884	-247.914	07_MeOH-Peptide_0.95_cpA.out	-247.041	-247.842	-247.885	-247.915	07_MeOH-Peptide_0.95_cpB.out	-115.06	-115.419	-115.443	-115.453		5.13382	8.20125	7.63835	8.22582		4.72922	6.82071	6.33821	6.78454		0.404607	1.38054	1.30014	1.44128	07_MeOH-Peptide_0.95_dimer.out	0.0245739	-0.0361652	-0.00579566	0.0905238		3.092	2.05533	2.57366
07_MeOH-Peptide_1.00_dimer.out	-362.11	-363.272	-363.338	-363.379	07_MeOH-Peptide_1.00_monomerA.out	-115.06	-115.418	-115.442	-115.452	07_MeOH-Peptide_1.00_monomerB.out	-247.04	-247.841	-247.884	-247.914	07_MeOH-Peptide_1.00_cpA.out	-247.041	-247.842	-247.885	-247.915	07_MeOH-Peptide_1.00_cpB.out	-115.06	-115.419	-115.443	-115.453		5.63558	8.2863	7.8268	8.34348		5.26964	7.08759	6.69571	7.08991		0.365941	1.19871	1.1311	1.25357	07_MeOH-Peptide_1.00_dimer.out	0.0571768	0.00231605	0.0297464	0.107452		2.7079	1.82027	2.26409
07_MeOH-Peptide_1.05_dimer.out	-362.11	-363.272	-363.338	-363.379	07_MeOH-Peptide_1.00_monomerA.out	-115.06	-115.418	-115.442	-115.452	07_MeOH-Peptide_1.00_monomerB.out	-247.04	-247.841	-247.884	-247.914	07_MeOH-Peptide_1.05_cpA.out	-247.041	-247.842	-247.884	-247.915	07_MeOH-Peptide_1.05_cpB.out	-115.06	-115.419	-115.443	-115.453		5.8051	8.09857	7.72268	8.17507		5.48039	7.0551	6.73669	7.08247		0.324707	1.04347	0.98599	1.0926	07_MeOH-Peptide_1.05_dimer.out	0.0764993	0.027365	0.0519321	0.114792		2.36997	1.60208	1.98602
07_MeOH-Peptide_1.10_dimer.out	-362.11	-363.271	-363.337	-363.378	07_MeOH-Peptide_1.00_monomerA.out	-115.06	-115.418	-115.442	-115.452	07_MeOH-Peptide_1.00_monomerB.out	-247.04	-247.841	-247.884	-247.914	07_MeOH-Peptide_1.10_cpA.out	-247.041	-247.842	-247.884	-247.915	07_MeOH-Peptide_1.10_cpB.out	-115.06	-115.419	-115.443	-115.453		5.75629	7.74604	7.437	7.83217		5.47235	6.83396	6.57439	6.87619		0.28394	0.912078	0.862607	0.955984	07_MeOH-Peptide_1.10_dimer.out	0.0861291	0.0422229	0.064176	0.115335		2.07588	1.40383	1.73985
07_MeOH-Peptide_1.25_dimer.out	-362.109	-363.269	-363.335	-363.376	07_MeOH-Peptide_1.00_monomerA.out	-115.06	-115.418	-115.442	-115.452	07_MeOH-Peptide_1.00_monomerB.out	-247.04	-247.841	-247.884	-247.914	07_MeOH-Peptide_1.25_cpA.out	-247.041	-247.841	-247.884	-247.914	07_MeOH-Peptide_1.25_cpB.out	-115.06	-115.419	-115.442	-115.453		4.99164	6.3103	6.1322	6.39456		4.79687	5.67469	5.52938	5.72639		0.194762	0.63561	0.602822	0.66817	07_MeOH-Peptide_1.25_dimer.out	0.0842645	0.0517043	0.0679844	0.0969806		1.40293	0.929519	1.16622
07_MeOH-Peptide_1.50_dimer.out	-362.106	-363.265	-363.331	-363.372	07_MeOH-Peptide_1.00_monomerA.out	-115.06	-115.418	-115.442	-115.452	07_MeOH-Peptide_1.00_monomerB.out	-247.04	-247.841	-247.884	-247.914	07_MeOH-Peptide_1.50_cpA.out	-247.04	-247.841	-247.884	-247.914	07_MeOH-Peptide_1.50_cpB.out	-115.06	-115.418	-115.442	-115.452		3.17307	3.7928	3.72063	3.84078		3.07213	3.4522	3.39634	3.48087		0.100942	0.340598	0.324286	0.359906	07_MeOH-Peptide_1.50_dimer.out	0.0479828	0.0286746	0.0383287	0.0510457		0.667706	0.408742	0.538224
07_MeOH-Peptide_2.00_dimer.out	-362.102	-363.261	-363.327	-363.368	07_MeOH-Peptide_1.00_monomerA.out	-115.06	-115.418	-115.442	-115.452	07_MeOH-Peptide_1.00_monomerB.out	-247.04	-247.841	-247.884	-247.914	07_MeOH-Peptide_2.00_cpA.out	-247.04	-247.841	-247.884	-247.914	07_MeOH-Peptide_2.00_cpB.out	-115.06	-115.418	-115.442	-115.452		1.07805	1.17971	1.16624	1.18538		1.05433	1.09806	1.08755	1.09851		0.0237254	0.0816537	0.078685	0.0868682	07_MeOH-Peptide_2.00_dimer.out	0.00566207	0.000447547	0.00305481	0.00598486		0.107323	0.0441806	0.075752
08_MeOH-Water_0.90_dimer.out	-191.106	-191.685	-191.716	-191.732	08_MeOH-Water_1.00_monomerA.out	-115.061	-115.418	-115.442	-115.452	08_MeOH-Water_1.00_monomerB.out	-76.0407	-76.2589	-76.2669	-76.2718	08_MeOH-Water_0.90_cpA.out	-76.0413	-76.2602	-76.2681	-76.2732	08_MeOH-Water_0.90_cpB.out	-115.061	-115.419	-115.442	-115.453		2.8742	4.96567	4.5004	4.90213		2.46823	3.82256	3.42065	3.69752		0.405971	1.14311	1.07975	1.20462	08_MeOH-Water_0.90_dimer.out	-0.0635345	-0.125041	-0.0942876	-0.0137695		2.02793	1.22929	1.62861
08_MeOH-Water_0.95_dimer.out	-191.107	-191.686	-191.717	-191.732	08_MeOH-Water_1.00_monomerA.out	-115.061	-115.418	-115.442	-115.452	08_MeOH-Water_1.00_monomerB.out	-76.0407	-76.2589	-76.2669	-76.2718	08_MeOH-Water_0.95_cpA.out	-76.0412	-76.26	-76.2679	-76.273	08_MeOH-Water_0.95_cpB.out	-115.061	-115.419	-115.442	-115.453		3.5844	5.31738	4.94952	5.2914		3.22464	4.33904	4.02471	4.25816		0.359761	0.978341	0.924811	1.03324	08_MeOH-Water_0.95_dimer.out	-0.0259817	-0.0808819	-0.0534318	0.0106111		1.707	1.03352	1.37026
08_MeOH-Water_1.00_dimer.out	-191.107	-191.686	-191.717	-191.732	08_MeOH-Water_1.00_monomerA.out	-115.061	-115.418	-115.442	-115.452	08_MeOH-Water_1.00_monomerB.out	-76.0407	-76.2589	-76.2669	-76.2718	08_MeOH-Water_1.00_cpA.out	-76.0412	-76.2599	-76.2678	-76.2728	08_MeOH-Water_1.00_cpB.out	-115.061	-115.419	-115.442	-115.452		3.91336	5.35403	5.06088	5.35062		3.59908	4.51172	4.26483	4.45991		0.314274	0.842314	0.79605	0.890705	08_MeOH-Water_1.00_dimer.out	-0.00341311	-0.0518039	-0.0276085	0.0235972		1.43726	0.860834	1.14905
08_MeOH-Water_1.05_dimer.out	-191.108	-191.685	-191.717	-191.732	08_MeOH-Water_1.00_monomerA.out	-115.061	-115.418	-115.442	-115.452	08_MeOH-Water_1.00_monomerB.out	-76.0407	-76.2589	-76.2669	-76.2718	08_MeOH-Water_1.05_cpA.out	-76.0411	-76.2597	-76.2677	-76.2727	08_MeOH-Water_1.05_cpB.out	-115.061	-115.419	-115.442	-115.452		3.99854	5.20251	4.96638	5.21155		3.72439	4.46908	4.27382	4.43561		0.274151	0.733432	0.692568	0.775941	08_MeOH-Water_1.05_dimer.out	0.00903591	-0.0334725	-0.0122183	0.0288264		1.21301	0.711223	0.962118
08_MeOH-Water_1.10_dimer.out	-191.108	-191.685	-191.716	-191.732	08_MeOH-Water_1.00_monomerA.out	-115.061	-115.418	-115.442	-115.452	08_MeOH-Water_1.00_monomerB.out	-76.0407	-76.2589	-76.2669	-76.2718	08_MeOH-Water_1.10_cpA.out	-76.0411	-76.2597	-76.2676	-76.2726	08_MeOH-Water_1.10_cpB.out	-115.061	-115.419	-115.442	-115.452		3.93199	4.94478	4.75213	4.95983		3.68911	4.29581	4.13978	4.27323		0.242879	0.648973	0.612354	0.686602	08_MeOH-Water_1.10_dimer.out	0.0150544	-0.0225745	-0.00376005	0.0291395		1.02785	0.584125	0.805986
08_MeOH-Water_1.25_dimer.out	-191.107	-191.683	-191.715	-191.73	08_MeOH-Water_1.00_monomerA.out	-115.061	-115.418	-115.442	-115.452	08_MeOH-Water_1.00_monomerB.out	-76.0407	-76.2589	-76.2669	-76.2718	08_MeOH-Water_1.25_cpA.out	-76.041	-76.2595	-76.2675	-76.2724	08_MeOH-Water_1.25_cpB.out	-115.061	-115.418	-115.442	-115.452		3.33171	3.95574	3.84254	3.97105		3.1428	3.47043	3.38462	3.45794		0.188908	0.485305	0.45792	0.513111	08_MeOH-Water_1.25_dimer.out	0.0153117	-0.0124938	0.00140893	0.0184104		0.639335	0.315133	0.477234
08_MeOH-Water_1.50_dimer.out	-191.105	-191.681	-191.713	-191.728	08_MeOH-Water_1.00_monomerA.out	-115.061	-115.418	-115.442	-115.452	08_MeOH-Water_1.00_monomerB.out	-76.0407	-76.2589	-76.2669	-76.2718	08_MeOH-Water_1.50_cpA.out	-76.0409	-76.2593	-76.2673	-76.2722	08_MeOH-Water_1.50_cpB.out	-115.061	-115.418	-115.442	-115.452		2.21262	2.51945	2.46046	2.52297		2.08697	2.20353	2.16243	2.18826		0.125653	0.315921	0.298031	0.334718	08_MeOH-Water_1.50_dimer.out	0.00352304	-0.0152733	-0.00587511	0.000994078		0.31035	0.101285	0.205817
08_MeOH-Water_2.00_dimer.out	-191.103	-191.679	-191.711	-191.726	08_MeOH-Water_1.00_monomerA.out	-115.061	-115.418	-115.442	-115.452	08_MeOH-Water_1.00_monomerB.out	-76.0407	-76.2589	-76.2669	-76.2718	08_MeOH-Water_2.00_cpA.out	-76.0408	-76.2591	-76.2671	-76.272	08_MeOH-Water_2.00_cpB.out	-115.061	-115.418	-115.442	-115.452		1.01711	1.11271	1.08656	1.10509		0.949963	0.958272	0.941794	0.94408		0.067143	0.154437	0.144768	0.161007	08_MeOH-Water_2.00_dimer.out	-0.00762169	-0.014192	-0.0109068	-0.00752122		0.0879811	-0.00588325	0.0410489
09_MeNH2-MeOH_0.90_dimer.out	-210.291	-210.993	-211.045	-211.066	09_MeNH2-MeOH_1.00_monomerA.out	-95.2297	-95.5694	-95.5993	-95.6096	09_MeNH2-MeOH_1.00_monomerB.out	-115.061	-115.418	-115.442	-115.452	09_MeNH2-MeOH_0.90_cpA.out	-115.061	-115.419	-115.443	-115.453	09_MeNH2-MeOH_0.90_cpB.out	-95.2299	-95.57	-95.5999	-95.6102		0.244087	2.95	2.4762	2.89889		-0.0202188	2.07563	1.64783	1.97971		0.264305	0.874372	0.828367	0.91918	09_MeNH2-MeOH_0.90_dimer.out	-0.0511087	-0.0959173	-0.073513	-0.0194807		2.65481	1.99993	2.32737
09_MeNH2-MeOH_0.95_dimer.out	-210.292	-210.993	-211.046	-211.067	09_MeNH2-MeOH_1.00_monomerA.out	-95.2297	-95.5694	-95.5993	-95.6096	09_MeNH2-MeOH_1.00_monomerB.out	-115.061	-115.418	-115.442	-115.452	09_MeNH2-MeOH_0.95_cpA.out	-115.061	-115.419	-115.443	-115.453	09_MeNH2-MeOH_0.95_cpB.out	-95.2298	-95.5699	-95.5998	-95.6101		0.924465	3.17201	2.79488	3.1481		0.716851	2.44933	2.11016	2.38585		0.207614	0.722687	0.684728	0.762256	09_MeNH2-MeOH_0.95_dimer.out	-0.023907	-0.0634762	-0.0436916	-0.00126517		2.22364	1.669	1.94632
09_MeNH2-MeOH_1.00_dimer.out	-210.292	-210.993	-211.046	-211.067	09_MeNH2-MeOH_1.00_monomerA.out	-95.2297	-95.5694	-95.5993	-95.6096	09_MeNH2-MeOH_1.00_monomerB.out	-115.061	-115.418	-115.442	-115.452	09_MeNH2-MeOH_1.00_cpA.out	-115.061	-115.419	-115.443	-115.453	09_MeNH2-MeOH_1.00_cpB.out	-95.2298	-95.5698	-95.5997	-95.61		1.29188	3.16952	2.86644	3.16234		1.12342	2.55936	2.28792	2.51663		0.168461	0.610168	0.578524	0.645712	09_MeNH2-MeOH_1.00_dimer.out	-0.00718225	-0.0427265	-0.0249544	0.00799123		1.87046	1.39321	1.63183
09_MeNH2-MeOH_1.05_dimer.out	-210.293	-210.993	-211.046	-211.067	09_MeNH2-MeOH_1.00_monomerA.out	-95.2297	-95.5694	-95.5993	-95.6096	09_MeNH2-MeOH_1.00_monomerB.out	-115.061	-115.418	-115.442	-115.452	09_MeNH2-MeOH_1.05_cpA.out	-115.061	-115.419	-115.443	-115.453	09_MeNH2-MeOH_1.05_cpB.out	-95.2298	-95.5698	-95.5996	-95.61		1.46149	3.03743	2.7916	3.04019		1.31827	2.51188	2.29268	2.48233		0.143217	0.525559	0.498919	0.557861	09_MeNH2-MeOH_1.05_dimer.out	0.00275459	-0.0295477	-0.0133965	0.0117359		1.5787	1.16405	1.37138
09_MeNH2-MeOH_1.10_dimer.out	-210.293	-210.992	-211.046	-211.066	09_MeNH2-MeOH_1.00_monomerA.out	-95.2297	-95.5694	-95.5993	-95.6096	09_MeNH2-MeOH_1.00_monomerB.out	-115.061	-115.418	-115.442	-115.452	09_MeNH2-MeOH_1.10_cpA.out	-115.061	-115.419	-115.443	-115.453	09_MeNH2-MeOH_1.10_cpB.out	-95.2298	-95.5697	-95.5996	-95.6099		1.50609	2.83489	2.63332	2.84285		1.38109	2.37709	2.19834	2.35577		0.124998	0.457795	0.434972	0.48708	09_MeNH2-MeOH_1.10_dimer.out	0.00796466	-0.0213202	-0.00667778	0.0122269		1.33676	0.974676	1.15572
09_MeNH2-MeOH_1.25_dimer.out	-210.292	-210.991	-211.045	-211.065	09_MeNH2-MeOH_1.00_monomerA.out	-95.2297	-95.5694	-95.5993	-95.6096	09_MeNH2-MeOH_1.00_monomerB.out	-115.061	-115.418	-115.442	-115.452	09_MeNH2-MeOH_1.25_cpA.out	-115.061	-115.419	-115.442	-115.453	09_MeNH2-MeOH_1.25_cpB.out	-95.2298	-95.5696	-95.5995	-95.6098		1.30643	2.12091	2.00205	2.12932		1.22608	1.81797	1.71497	1.80598		0.0803491	0.302939	0.287081	0.323338	09_MeNH2-MeOH_1.25_dimer.out	0.00841478	-0.0119841	-0.00178465	0.0065233		0.822891	0.579902	0.701397
09_MeNH2-MeOH_1.50_dimer.out	-210.292	-210.99	-211.043	-211.064	09_MeNH2-MeOH_1.00_monomerA.out	-95.2297	-95.5694	-95.5993	-95.6096	09_MeNH2-MeOH_1.00_monomerB.out	-115.061	-115.418	-115.442	-115.452	09_MeNH2-MeOH_1.50_cpA.out	-115.061	-115.419	-115.442	-115.452	09_MeNH2-MeOH_1.50_cpB.out	-95.2297	-95.5695	-95.5994	-95.6097		0.843798	1.22968	1.17155	1.23025		0.797044	1.06205	1.01267	1.05093		0.046754	0.16763	0.158879	0.179325	09_MeNH2-MeOH_1.50_dimer.out	0.000569708	-0.0111255	-0.00527788	-0.00239945		0.386456	0.253885	0.32017
09_MeNH2-MeOH_2.00_dimer.out	-210.291	-210.989	-211.042	-211.063	09_MeNH2-MeOH_1.00_monomerA.out	-95.2297	-95.5694	-95.5993	-95.6096	09_MeNH2-MeOH_1.00_monomerB.out	-115.061	-115.418	-115.442	-115.452	09_MeNH2-MeOH_2.00_cpA.out	-115.061	-115.418	-115.442	-115.452	09_MeNH2-MeOH_2.00_cpB.out	-95.2297	-95.5695	-95.5994	-95.6097		0.355133	0.459695	0.440549	0.455298		0.338397	0.402696	0.38667	0.394975		0.0167359	0.0569988	0.0538789	0.0603234	09_MeNH2-MeOH_2.00_dimer.out	-0.00439697	-0.00772157	-0.00605927	-0.00519621		0.100165	0.0565778	0.0783715
10_MeNH2-MeNH2_0.90_dimer.out	-190.459	-191.145	-191.203	-191.225	10_MeNH2-MeNH2_1.00_monomerA.out	-95.2297	-95.5694	-95.5994	-95.6097	10_MeNH2-MeNH2_1.00_monomerB.out	-95.2297	-95.5694	-95.5994	-95.6097	10_MeNH2-MeNH2_0.90_cpA.out	-95.2301	-95.5705	-95.6004	-95.6108	10_MeNH2-MeNH2_0.90_cpB.out	-95.2299	-95.5702	-95.6001	-95.6105		-0.523906	3.8325	2.93544	3.54313		-0.871671	2.65732	1.84143	2.33998		0.347766	1.17519	1.09401	1.20315	10_MeNH2-MeNH2_0.90_dimer.out	-0.289376	-0.317336	-0.303356	-0.231327		4.06703	3.21165	3.63934
10_MeNH2-MeNH2_0.95_dimer.out	-190.46	-191.146	-191.204	-191.226	10_MeNH2-MeNH2_1.00_monomerA.out	-95.2297	-95.5694	-95.5994	-95.6097	10_MeNH2-MeNH2_1.00_monomerB.out	-95.2297	-95.5694	-95.5994	-95.6097	10_MeNH2-MeNH2_0.95_cpA.out	-95.23	-95.5703	-95.6002	-95.6106	10_MeNH2-MeNH2_0.95_cpB.out	-95.2299	-95.5701	-95.6	-95.6103		0.593876	4.21825	3.49733	4.00877		0.305218	3.24257	2.58786	3.00812		0.288659	0.975682	0.909469	1.00065	10_MeNH2-MeNH2_0.95_dimer.out	-0.209482	-0.234445	-0.221963	-0.164908		3.41489	2.7029	3.0589
10_MeNH2-MeNH2_1.00_dimer.out	-190.461	-191.146	-191.205	-191.226	10_MeNH2-MeNH2_1.00_monomerA.out	-95.2297	-95.5694	-95.5994	-95.6097	10_MeNH2-MeNH2_1.00_monomerB.out	-95.2297	-95.5694	-95.5994	-95.6097	10_MeNH2-MeNH2_1.00_cpA.out	-95.23	-95.5702	-95.6001	-95.6104	10_MeNH2-MeNH2_1.00_cpB.out	-95.2298	-95.57	-95.5999	-95.6102		1.24591	4.27082	3.68767	4.11789		1.00962	3.45884	2.93024	3.2837		0.236287	0.811986	0.757434	0.834194	10_MeNH2-MeNH2_1.00_dimer.out	-0.152927	-0.175136	-0.164031	-0.118707		2.87199	2.27408	2.57303
10_MeNH2-MeNH2_1.05_dimer.out	-190.462	-191.145	-191.205	-191.226	10_MeNH2-MeNH2_1.00_monomerA.out	-95.2297	-95.5694	-95.5994	-95.6097	10_MeNH2-MeNH2_1.00_monomerB.out	-95.2297	-95.5694	-95.5994	-95.6097	10_MeNH2-MeNH2_1.05_cpA.out	-95.2299	-95.5701	-95.5999	-95.6103	10_MeNH2-MeNH2_1.05_cpB.out	-95.2298	-95.5699	-95.5998	-95.6101		1.59368	4.12573	3.65101	4.01293		1.39952	3.44523	3.01571	3.31241		0.194162	0.680499	0.635294	0.700524	10_MeNH2-MeNH2_1.05_dimer.out	-0.112794	-0.13282	-0.122807	-0.0868332		2.41925	1.91289	2.16607
10_MeNH2-MeNH2_1.10_dimer.out	-190.462	-191.145	-191.204	-191.225	10_MeNH2-MeNH2_1.00_monomerA.out	-95.2297	-95.5694	-95.5994	-95.6097	10_MeNH2-MeNH2_1.00_monomerB.out	-95.2297	-95.5694	-95.5994	-95.6097	10_MeNH2-MeNH2_1.10_cpA.out	-95.2299	-95.57	-95.5998	-95.6102	10_MeNH2-MeNH2_1.10_cpB.out	-95.2298	-95.5698	-95.5997	-95.6101		1.74532	3.87203	3.48282	3.78763		1.5823	3.29534	2.94372	3.19258		0.163015	0.576695	0.539099	0.595049	10_MeNH2-MeNH2_1.10_dimer.out	-0.0844038	-0.102758	-0.093581	-0.0650796		2.04231	1.61028	1.8263
10_MeNH2-MeNH2_1.25_dimer.out	-190.462	-191.144	-191.203	-191.224	10_MeNH2-MeNH2_1.00_monomerA.out	-95.2297	-95.5694	-95.5994	-95.6097	10_MeNH2-MeNH2_1.00_monomerB.out	-95.2297	-95.5694	-95.5994	-95.6097	10_MeNH2-MeNH2_1.25_cpA.out	-95.2298	-95.5698	-95.5997	-95.61	10_MeNH2-MeNH2_1.25_cpB.out	-95.2297	-95.5697	-95.5996	-95.6099		1.63647	2.92202	2.69749	2.88111		1.53015	2.55313	2.35105	2.49811		0.106327	0.368886	0.346444	0.382998	10_MeNH2-MeNH2_1.25_dimer.out	-0.0409121	-0.0550246	-0.0479684	-0.0334406		1.24463	0.967963	1.1063
10_MeNH2-MeNH2_1.50_dimer.out	-190.461	-191.141	-191.201	-191.222	10_MeNH2-MeNH2_1.00_monomerA.out	-95.2297	-95.5694	-95.5994	-95.6097	10_MeNH2-MeNH2_1.00_monomerB.out	-95.2297	-95.5694	-95.5994	-95.6097	10_MeNH2-MeNH2_1.50_cpA.out	-95.2298	-95.5696	-95.5995	-95.6098	10_MeNH2-MeNH2_1.50_cpB.out	-95.2297	-95.5695	-95.5995	-95.6098		0.931434	1.42457	1.33712	1.40479		0.886213	1.2639	1.18575	1.23668		0.0452217	0.160675	0.15137	0.168106	10_MeNH2-MeNH2_1.50_dimer.out	-0.0197871	-0.0272184	-0.0235028	-0.0195033		0.473351	0.350467	0.411909
10_MeNH2-MeNH2_2.00_dimer.out	-190.46	-191.14	-191.199	-191.22	10_MeNH2-MeNH2_1.00_monomerA.out	-95.2297	-95.5694	-95.5994	-95.6097	10_MeNH2-MeNH2_1.00_monomerB.out	-95.2297	-95.5694	-95.5994	-95.6097	10_MeNH2-MeNH2_2.00_cpA.out	-95.2298	-95.5695	-95.5994	-95.6097	10_MeNH2-MeNH2_2.00_cpB.out	-95.2297	-95.5695	-95.5994	-95.6097		0.326635	0.439251	0.414914	0.42863		0.315273	0.399495	0.377544	0.38749		0.0113616	0.0397561	0.0373696	0.0411408	10_MeNH2-MeNH2_2.00_dimer.out	-0.0106207	-0.0120053	-0.011313	-0.0113331		0.101996	0.0722166	0.0871062
11_MeNH2-Peptide_0.90_dimer.out	-342.27	-343.419	-343.49	-343.532	11_MeNH2-Peptide_1.00_monomerA.out	-95.2297	-95.5694	-95.5993	-95.6096	11_MeNH2-Peptide_1.00_monomerB.out	-247.041	-247.841	-247.884	-247.914	11_MeNH2-Peptide_0.90_cpA.out	-247.041	-247.843	-247.885	-247.916	11_MeNH2-Peptide_0.90_cpB.out	-95.23	-95.5707	-95.6005	-95.611		0.137069	5.44997	4.43795	5.24967		-0.326928	3.74186	2.83077	3.46505		0.463997	1.70811	1.60718	1.78462	11_MeNH2-Peptide_0.90_dimer.out	-0.200296	-0.276805	-0.238551	-0.220366		5.11261	3.79198	4.45229
11_MeNH2-Peptide_0.95_dimer.out	-342.272	-343.42	-343.491	-343.533	11_MeNH2-Peptide_1.00_monomerA.out	-95.2297	-95.5694	-95.5993	-95.6096	11_MeNH2-Peptide_1.00_monomerB.out	-247.041	-247.841	-247.884	-247.914	11_MeNH2-Peptide_0.95_cpA.out	-247.041	-247.842	-247.885	-247.915	11_MeNH2-Peptide_0.95_cpB.out	-95.23	-95.5705	-95.6004	-95.6108		1.29385	5.81472	4.98099	5.67619		0.903176	4.35223	3.60465	4.14658		0.390679	1.46249	1.37635	1.5296	11_MeNH2-Peptide_0.95_dimer.out	-0.138535	-0.205646	-0.172091	-0.158824		4.38233	3.24341	3.81287
11_MeNH2-Peptide_1.00_dimer.out	-342.273	-343.42	-343.491	-343.533	11_MeNH2-Peptide_1.00_monomerA.out	-95.2297	-95.5694	-95.5993	-95.6096	11_MeNH2-Peptide_1.00_monomerB.out	-247.041	-247.841	-247.884	-247.914	11_MeNH2-Peptide_1.00_cpA.out	-247.041	-247.842	-247.885	-247.915	11_MeNH2-Peptide_1.00_cpB.out	-95.2299	-95.5704	-95.6002	-95.6106		1.97414	5.8282	5.1386	5.73384		1.64147	4.56717	3.95106	4.41329		0.332675	1.26103	1.18754	1.32055	11_MeNH2-Peptide_1.00_dimer.out	-0.0943595	-0.153882	-0.124121	-0.114575		3.7597	2.77183	3.26576
11_MeNH2-Peptide_1.05_dimer.out	-342.274	-343.42	-343.491	-343.533	11_MeNH2-Peptide_1.00_monomerA.out	-95.2297	-95.5694	-95.5993	-95.6096	11_MeNH2-Peptide_1.00_monomerB.out	-247.041	-247.841	-247.884	-247.914	11_MeNH2-Peptide_1.05_cpA.out	-247.041	-247.842	-247.885	-247.915	11_MeNH2-Peptide_1.05_cpB.out	-95.2299	-95.5702	-95.6001	-95.6105		2.33727	5.62696	5.0546	5.56396		2.04844	4.53116	4.02146	4.41505		0.288836	1.0958	1.03314	1.14891	11_MeNH2-Peptide_1.05_dimer.out	-0.0629978	-0.116108	-0.0895532	-0.0827615		3.22669	2.36661	2.79665
11_MeNH2-Peptide_1.10_dimer.out	-342.274	-343.419	-343.491	-343.532	11_MeNH2-Peptide_1.00_monomerA.out	-95.2297	-95.5694	-95.5993	-95.6096	11_MeNH2-Peptide_1.00_monomerB.out	-247.041	-247.841	-247.884	-247.914	11_MeNH2-Peptide_1.10_cpA.out	-247.041	-247.842	-247.885	-247.915	11_MeNH2-Peptide_1.10_cpB.out	-95.2299	-95.5701	-95.6	-95.6104		2.48916	5.30189	4.8248	5.26064		2.23507	4.34386	3.92042	4.25531		0.254092	0.958034	0.904378	1.00533	11_MeNH2-Peptide_1.10_dimer.out	-0.0412522	-0.0885487	-0.0649005	-0.0599778		2.77148	2.02024	2.39586
11_MeNH2-Peptide_1.25_dimer.out	-342.274	-343.416	-343.488	-343.529	11_MeNH2-Peptide_1.00_monomerA.out	-95.2297	-95.5694	-95.5993	-95.6096	11_MeNH2-Peptide_1.00_monomerB.out	-247.041	-247.841	-247.884	-247.914	11_MeNH2-Peptide_1.25_cpA.out	-247.041	-247.842	-247.884	-247.914	11_MeNH2-Peptide_1.25_cpB.out	-95.2298	-95.5698	-95.5997	-95.6101		2.07467	3.47103	3.25267	3.46577		1.9384	2.94086	2.75175	2.90987		0.136265	0.530164	0.500915	0.555899	11_MeNH2-Peptide_1.25_dimer.out	-0.00525567	-0.0309898	-0.0181227	-0.015743		1.39111	0.971472	1.18129
11_MeNH2-Peptide_1.50_dimer.out	-342.272	-343.413	-343.486	-343.526	11_MeNH2-Peptide_1.00_monomerA.out	-95.2297	-95.5694	-95.5993	-95.6096	11_MeNH2-Peptide_1.00_monomerB.out	-247.041	-247.841	-247.884	-247.914	11_MeNH2-Peptide_1.50_cpA.out	-247.041	-247.841	-247.884	-247.914	11_MeNH2-Peptide_1.50_cpB.out	-95.2297	-95.5696	-95.5995	-95.6098		1.0934	1.57898	1.50655	1.57786		1.03266	1.34321	1.28346	1.33095		0.0607383	0.235763	0.223089	0.246906	11_MeNH2-Peptide_1.50_dimer.out	-0.00111896	-0.012262	-0.00669047	-0.00589088		0.484459	0.298291	0.391375
11_MeNH2-Peptide_2.00_dimer.out	-342.271	-343.411	-343.484	-343.524	11_MeNH2-Peptide_1.00_monomerA.out	-95.2297	-95.5694	-95.5993	-95.6096	11_MeNH2-Peptide_1.00_monomerB.out	-247.041	-247.841	-247.884	-247.914	11_MeNH2-Peptide_2.00_cpA.out	-247.041	-247.841	-247.884	-247.914	11_MeNH2-Peptide_2.00_cpB.out	-95.2297	-95.5695	-95.5994	-95.6097		0.427079	0.523594	0.508946	0.522532		0.408221	0.456393	0.44524	0.452469		0.0188583	0.0672013	0.0637066	0.0700631	11_MeNH2-Peptide_2.00_dimer.out	-0.00106181	-0.00392359	-0.0024927	-0.00259795		0.0954533	0.0442484	0.0698509
12_MeNH2-Water_0.90_dimer.out	-171.276	-171.84	-171.876	-171.892	12_MeNH2-Water_1.00_monomerA.out	-95.2298	-95.5694	-95.5993	-95.6096	12_MeNH2-Water_1.00_monomerB.out	-76.0402	-76.2588	-76.2668	-76.2718	12_MeNH2-Water_0.90_cpA.out	-76.0405	-76.2597	-76.2676	-76.2727	12_MeNH2-Water_0.90_cpB.out	-95.2301	-95.5707	-95.6005	-95.6109		3.55948	7.09473	6.14476	6.69309		3.14999	5.78124	4.92202	5.32861		0.40949	1.31349	1.22274	1.36448	12_MeNH2-Water_0.90_dimer.out	-0.401637	-0.452626	-0.427132	-0.305009		3.13362	2.17862	2.65612
12_MeNH2-Water_0.95_dimer.out	-171.277	-171.84	-171.877	-171.893	12_MeNH2-Water_1.00_monomerA.out	-95.2298	-95.5694	-95.5993	-95.6096	12_MeNH2-Water_1.00_monomerB.out	-76.0402	-76.2588	-76.2668	-76.2718	12_MeNH2-Water_0.95_cpA.out	-76.0405	-76.2596	-76.2675	-76.2725	12_MeNH2-Water_0.95_cpB.out	-95.2301	-95.5705	-95.6003	-95.6107		4.51682	7.50783	6.72398	7.2016		4.15666	6.39608	5.68597	6.04127		0.360163	1.11175	1.03801	1.16033	12_MeNH2-Water_0.95_dimer.out	-0.306226	-0.354809	-0.330517	-0.230109		2.68478	1.88461	2.28469
12_MeNH2-Water_1.00_dimer.out	-171.278	-171.84	-171.877	-171.893	12_MeNH2-Water_1.00_monomerA.out	-95.2298	-95.5694	-95.5993	-95.6096	12_MeNH2-Water_1.00_monomerB.out	-76.0402	-76.2588	-76.2668	-76.2718	12_MeNH2-Water_1.00_cpA.out	-76.0404	-76.2595	-76.2674	-76.2724	12_MeNH2-Water_1.00_cpB.out	-95.2301	-95.5703	-95.6002	-95.6105		4.98891	7.51418	6.86773	7.28059		4.67457	6.57472	5.98754	6.29523		0.314338	0.939465	0.880194	0.985366	12_MeNH2-Water_1.00_dimer.out	-0.23359	-0.27949	-0.25654	-0.174298		2.29169	1.62066	1.95617
12_MeNH2-Water_1.05_dimer.out	-171.278	-171.84	-171.877	-171.893	12_MeNH2-Water_1.00_monomerA.out	-95.2298	-95.5694	-95.5993	-95.6096	12_MeNH2-Water_1.00_monomerB.out	-76.0402	-76.2588	-76.2668	-76.2718	12_MeNH2-Water_1.05_cpA.out	-76.0404	-76.2594	-76.2673	-76.2723	12_MeNH2-Water_1.05_cpB.out	-95.23	-95.5702	-95.6	-95.6104		5.13892	7.27018	6.73586	7.09045		4.86737	6.47597	5.98947	6.25374		0.271555	0.794214	0.746394	0.836713	12_MeNH2-Water_1.05_dimer.out	-0.179733	-0.222232	-0.200983	-0.13347		1.95153	1.38637	1.66895
12_MeNH2-Water_1.10_dimer.out	-171.278	-171.839	-171.876	-171.892	12_MeNH2-Water_1.00_monomerA.out	-95.2298	-95.5694	-95.5993	-95.6096	12_MeNH2-Water_1.00_monomerB.out	-76.0402	-76.2588	-76.2668	-76.2718	12_MeNH2-Water_1.10_cpA.out	-76.0404	-76.2593	-76.2672	-76.2723	12_MeNH2-Water_1.10_cpB.out	-95.23	-95.57	-95.5999	-95.6103		5.07951	6.88171	6.43776	6.74103		4.84693	6.20768	5.80286	6.02835		0.232582	0.674029	0.634904	0.712683	12_MeNH2-Water_1.10_dimer.out	-0.140684	-0.179337	-0.160011	-0.104207		1.66151	1.18141	1.42146
12_MeNH2-Water_1.25_dimer.out	-171.277	-171.837	-171.874	-171.89	12_MeNH2-Water_1.00_monomerA.out	-95.2298	-95.5694	-95.5993	-95.6096	12_MeNH2-Water_1.00_monomerB.out	-76.0402	-76.2588	-76.2668	-76.2718	12_MeNH2-Water_1.25_cpA.out	-76.0403	-76.2591	-76.2671	-76.2721	12_MeNH2-Water_1.25_cpB.out	-95.2299	-95.5698	-95.5997	-95.6101		4.32083	5.42972	5.16502	5.35254		4.17119	4.9973	4.75543	4.89154		0.149645	0.432422	0.409595	0.461002	12_MeNH2-Water_1.25_dimer.out	-0.0771863	-0.105767	-0.0914766	-0.0584353		1.0317	0.720347	0.876026
12_MeNH2-Water_1.50_dimer.out	-171.274	-171.834	-171.871	-171.887	12_MeNH2-Water_1.00_monomerA.out	-95.2298	-95.5694	-95.5993	-95.6096	12_MeNH2-Water_1.00_monomerB.out	-76.0402	-76.2588	-76.2668	-76.2718	12_MeNH2-Water_1.50_cpA.out	-76.0403	-76.259	-76.267	-76.2719	12_MeNH2-Water_1.50_cpB.out	-95.2298	-95.5696	-95.5995	-95.6099		2.81242	3.33833	3.21055	3.29528		2.73109	3.10635	2.98856	3.04496		0.0813287	0.231984	0.22199	0.250324	12_MeNH2-Water_1.50_dimer.out	-0.0430489	-0.0613889	-0.0522189	-0.0362026		0.482862	0.313867	0.398364
12_MeNH2-Water_2.00_dimer.out	-171.272	-171.83	-171.868	-171.883	12_MeNH2-Water_1.00_monomerA.out	-95.2298	-95.5694	-95.5993	-95.6096	12_MeNH2-Water_1.00_monomerB.out	-76.0402	-76.2588	-76.2668	-76.2718	12_MeNH2-Water_2.00_cpA.out	-76.0403	-76.2589	-76.2669	-76.2718	12_MeNH2-Water_2.00_cpB.out	-95.2298	-95.5695	-95.5994	-95.6097		1.17679	1.32101	1.27637	1.29585		1.14646	1.24083	1.19902	1.2088		0.030331	0.0801836	0.0773479	0.0870443	12_MeNH2-Water_2.00_dimer.out	-0.0251641	-0.0320248	-0.0285944	-0.0238103		0.119056	0.0623431	0.0906997
13_Peptide-MeOH_0.90_dimer.out	-362.104	-363.269	-363.334	-363.376	13_Peptide-MeOH_1.00_monomerA.out	-247.041	-247.841	-247.884	-247.914	13_Peptide-MeOH_1.00_monomerB.out	-115.061	-115.418	-115.442	-115.452	13_Peptide-MeOH_0.90_cpA.out	-115.061	-115.42	-115.443	-115.454	13_Peptide-MeOH_0.90_cpB.out	-247.041	-247.842	-247.885	-247.915		1.92614	6.13117	5.2401	5.8835		1.50375	4.66481	3.85354	4.35125		0.422394	1.46637	1.38656	1.53225	13_Peptide-MeOH_0.90_dimer.out	-0.247674	-0.313553	-0.280613	-0.191739		3.95736	2.84751	3.40243
13_Peptide-MeOH_0.95_dimer.out	-362.106	-363.27	-363.335	-363.376	13_Peptide-MeOH_1.00_monomerA.out	-247.041	-247.841	-247.884	-247.914	13_Peptide-MeOH_1.00_monomerB.out	-115.061	-115.418	-115.442	-115.452	13_Peptide-MeOH_0.95_cpA.out	-115.061	-115.42	-115.443	-115.453	13_Peptide-MeOH_0.95_cpB.out	-247.041	-247.842	-247.885	-247.915		2.94849	6.51867	5.79143	6.34345		2.58151	5.25633	4.59691	5.02252		0.366983	1.26234	1.19452	1.32093	13_Peptide-MeOH_0.95_dimer.out	-0.175226	-0.233812	-0.204519	-0.134446		3.39495	2.44101	2.91798
13_Peptide-MeOH_1.00_dimer.out	-362.107	-363.27	-363.336	-363.377	13_Peptide-MeOH_1.00_monomerA.out	-247.041	-247.841	-247.884	-247.914	13_Peptide-MeOH_1.00_monomerB.out	-115.061	-115.418	-115.442	-115.452	13_Peptide-MeOH_1.00_cpA.out	-115.061	-115.419	-115.443	-115.453	13_Peptide-MeOH_1.00_cpB.out	-247.041	-247.842	-247.885	-247.915		3.51681	6.55858	5.96106	6.43442		3.20151	5.46538	4.92595	5.2889		0.315298	1.0932	1.03512	1.14553	13_Peptide-MeOH_1.00_dimer.out	-0.124158	-0.176486	-0.150322	-0.095252		2.91761	2.08738	2.5025
13_Peptide-MeOH_1.05_dimer.out	-362.107	-363.27	-363.335	-363.376	13_Peptide-MeOH_1.00_monomerA.out	-247.041	-247.841	-247.884	-247.914	13_Peptide-MeOH_1.00_monomerB.out	-115.061	-115.418	-115.442	-115.452	13_Peptide-MeOH_1.05_cpA.out	-115.061	-115.419	-115.443	-115.453	13_Peptide-MeOH_1.05_cpB.out	-247.041	-247.842	-247.885	-247.915		3.78302	6.38353	5.88935	6.29538		3.51366	5.43032	4.98602	5.29478		0.269355	0.953217	0.903325	1.0006	13_Peptide-MeOH_1.05_dimer.out	-0.0881497	-0.135534	-0.111842	-0.0688561		2.51237	1.78112	2.14674
13_Peptide-MeOH_1.10_dimer.out	-362.107	-363.269	-363.335	-363.376	13_Peptide-MeOH_1.00_monomerA.out	-247.041	-247.841	-247.884	-247.914	13_Peptide-MeOH_1.00_monomerB.out	-115.061	-115.418	-115.442	-115.452	13_Peptide-MeOH_1.10_cpA.out	-115.061	-115.419	-115.443	-115.453	13_Peptide-MeOH_1.10_cpB.out	-247.041	-247.842	-247.884	-247.915		3.8519	6.08329	5.6716	6.02043		3.6198	5.24446	4.87566	5.138		0.232099	0.838832	0.795939	0.882427	13_Peptide-MeOH_1.10_dimer.out	-0.0628647	-0.10646	-0.0846622	-0.0513724		2.16853	1.5182	1.84337
13_Peptide-MeOH_1.25_dimer.out	-362.107	-363.267	-363.333	-363.374	13_Peptide-MeOH_1.00_monomerA.out	-247.041	-247.841	-247.884	-247.914	13_Peptide-MeOH_1.00_monomerB.out	-115.061	-115.418	-115.442	-115.452	13_Peptide-MeOH_1.25_cpA.out	-115.061	-115.419	-115.443	-115.453	13_Peptide-MeOH_1.25_cpB.out	-247.041	-247.842	-247.884	-247.914		3.48951	4.9205	4.67141	4.89441		3.32396	4.32092	4.10039	4.26072		0.165545	0.599582	0.57102	0.633686	13_Peptide-MeOH_1.25_dimer.out	-0.0260943	-0.0601988	-0.0431466	-0.0275486		1.4049	0.936762	1.17083
13_Peptide-MeOH_1.50_dimer.out	-362.105	-363.265	-363.331	-363.371	13_Peptide-MeOH_1.00_monomerA.out	-247.041	-247.841	-247.884	-247.914	13_Peptide-MeOH_1.00_monomerB.out	-115.061	-115.418	-115.442	-115.452	13_Peptide-MeOH_1.50_cpA.out	-115.061	-115.419	-115.442	-115.453	13_Peptide-MeOH_1.50_cpB.out	-247.041	-247.841	-247.884	-247.914		2.50292	3.20155	3.07752	3.18436		2.39693	2.84332	2.73712	2.80695		0.105984	0.358233	0.340402	0.377407	13_Peptide-MeOH_1.50_dimer.out	-0.0171919	-0.0363662	-0.0267791	-0.0191633		0.681446	0.410023	0.545734
13_Peptide-MeOH_2.00_dimer.out	-362.103	-363.262	-363.328	-363.369	13_Peptide-MeOH_1.00_monomerA.out	-247.041	-247.841	-247.884	-247.914	13_Peptide-MeOH_1.00_monomerB.out	-115.061	-115.418	-115.442	-115.452	13_Peptide-MeOH_2.00_cpA.out	-115.061	-115.419	-115.442	-115.452	13_Peptide-MeOH_2.00_cpB.out	-247.041	-247.841	-247.884	-247.914		1.26561	1.43356	1.39505	1.41941		1.22173	1.30067	1.26902	1.2807		0.043882	0.132897	0.126033	0.138716	13_Peptide-MeOH_2.00_dimer.out	-0.014151	-0.0199696	-0.0170603	-0.0119377		0.153799	0.0589651	0.106382
14_Peptide-MeNH2_0.90_dimer.out	-342.273	-343.423	-343.493	-343.535	14_Peptide-MeNH2_1.00_monomerA.out	-247.04	-247.841	-247.884	-247.914	14_Peptide-MeNH2_1.00_monomerB.out	-95.2297	-95.5695	-95.5994	-95.6097	14_Peptide-MeNH2_0.90_cpA.out	-95.2302	-95.5712	-95.601	-95.6115	14_Peptide-MeNH2_0.90_cpB.out	-247.041	-247.842	-247.885	-247.915		2.02749	7.6291	6.34111	7.19585		1.49726	5.80912	4.64447	5.32628		0.530228	1.81998	1.69664	1.86957	14_Peptide-MeNH2_0.90_dimer.out	-0.433246	-0.482836	-0.458041	-0.342118		5.16836	3.82902	4.49869
14_Peptide-MeNH2_0.95_dimer.out	-342.275	-343.423	-343.494	-343.536	14_Peptide-MeNH2_1.00_monomerA.out	-247.04	-247.841	-247.884	-247.914	14_Peptide-MeNH2_1.00_monomerB.out	-95.2297	-95.5695	-95.5994	-95.6097	14_Peptide-MeNH2_0.95_cpA.out	-95.2302	-95.571	-95.6008	-95.6112	14_Peptide-MeNH2_0.95_cpB.out	-247.04	-247.842	-247.885	-247.915		3.26422	8.06056	6.99909	7.74439		2.79256	6.47701	5.51943	6.11405		0.471665	1.58354	1.47966	1.63034	14_Peptide-MeNH2_0.95_dimer.out	-0.316168	-0.362963	-0.339566	-0.246508		4.48017	3.32149	3.90083
14_Peptide-MeNH2_1.00_dimer.out	-342.276	-343.423	-343.495	-343.536	14_Peptide-MeNH2_1.00_monomerA.out	-247.04	-247.841	-247.884	-247.914	14_Peptide-MeNH2_1.00_monomerB.out	-95.2297	-95.5695	-95.5994	-95.6097	14_Peptide-MeNH2_1.00_cpA.out	-95.2301	-95.5708	-95.6006	-95.611	14_Peptide-MeNH2_1.00_cpB.out	-247.04	-247.842	-247.885	-247.915		3.98069	8.09675	7.21943	7.86781		3.56213	6.71098	5.92193	6.43864		0.418562	1.38577	1.29751	1.42917	14_Peptide-MeNH2_1.00_dimer.out	-0.228938	-0.272336	-0.250637	-0.176577		3.88712	2.87652	3.38182
14_Peptide-MeNH2_1.05_dimer.out	-342.277	-343.423	-343.495	-343.536	14_Peptide-MeNH2_1.00_monomerA.out	-247.04	-247.841	-247.884	-247.914	14_Peptide-MeNH2_1.00_monomerB.out	-95.2297	-95.5695	-95.5994	-95.6097	14_Peptide-MeNH2_1.05_cpA.out	-95.2301	-95.5706	-95.6005	-95.6109	14_Peptide-MeNH2_1.05_cpB.out	-247.04	-247.842	-247.884	-247.915		4.34149	7.88409	7.15582	7.71903		3.97107	6.66328	6.01113	6.45868		0.370426	1.2208	1.14469	1.26036	14_Peptide-MeNH2_1.05_dimer.out	-0.165051	-0.204605	-0.184828	-0.126031		3.37754	2.48761	2.93258
14_Peptide-MeNH2_1.10_dimer.out	-342.277	-343.422	-343.494	-343.535	14_Peptide-MeNH2_1.00_monomerA.out	-247.04	-247.841	-247.884	-247.914	14_Peptide-MeNH2_1.00_monomerB.out	-95.2297	-95.5695	-95.5994	-95.6097	14_Peptide-MeNH2_1.10_cpA.out	-95.2301	-95.5705	-95.6003	-95.6108	14_Peptide-MeNH2_1.10_cpB.out	-247.04	-247.842	-247.884	-247.915		4.46139	7.5213	6.91314	7.40223		4.13319	6.43805	5.8965	6.28328		0.3282	1.08325	1.01663	1.11895	14_Peptide-MeNH2_1.10_dimer.out	-0.119072	-0.154775	-0.136924	-0.0905651		2.94084	2.15009	2.54547
14_Peptide-MeNH2_1.25_dimer.out	-342.276	-343.42	-343.492	-343.533	14_Peptide-MeNH2_1.00_monomerA.out	-247.04	-247.841	-247.884	-247.914	14_Peptide-MeNH2_1.00_monomerB.out	-95.2297	-95.5695	-95.5994	-95.6097	14_Peptide-MeNH2_1.25_cpA.out	-95.23	-95.5702	-95.6001	-95.6105	14_Peptide-MeNH2_1.25_cpB.out	-247.04	-247.841	-247.884	-247.914		4.08557	6.08576	5.71832	6.03813		3.84845	5.30731	4.9866	5.23384		0.237119	0.778459	0.731718	0.80429	14_Peptide-MeNH2_1.25_dimer.out	-0.0476387	-0.07347	-0.0605543	-0.0378803		1.95256	1.38539	1.66897
14_Peptide-MeNH2_1.50_dimer.out	-342.275	-343.417	-343.489	-343.53	14_Peptide-MeNH2_1.00_monomerA.out	-247.04	-247.841	-247.884	-247.914	14_Peptide-MeNH2_1.00_monomerB.out	-95.2297	-95.5695	-95.5994	-95.6097	14_Peptide-MeNH2_1.50_cpA.out	-95.2299	-95.5699	-95.5998	-95.6101	14_Peptide-MeNH2_1.50_cpB.out	-247.04	-247.841	-247.884	-247.914		2.88713	3.89232	3.71347	3.86971		2.74696	3.44357	3.29217	3.40723		0.140168	0.448745	0.421304	0.462479	14_Peptide-MeNH2_1.50_dimer.out	-0.0226072	-0.0363404	-0.0294738	-0.0205166		0.982585	0.660274	0.82143
14_Peptide-MeNH2_2.00_dimer.out	-342.272	-343.413	-343.486	-343.526	14_Peptide-MeNH2_1.00_monomerA.out	-247.04	-247.841	-247.884	-247.914	14_Peptide-MeNH2_1.00_monomerB.out	-95.2297	-95.5695	-95.5994	-95.6097	14_Peptide-MeNH2_2.00_cpA.out	-95.2298	-95.5696	-95.5995	-95.6099	14_Peptide-MeNH2_2.00_cpB.out	-247.04	-247.841	-247.884	-247.914		1.38984	1.67045	1.61187	1.65226		1.32671	1.49512	1.44727	1.47201		0.0631364	0.175328	0.164598	0.180252	14_Peptide-MeNH2_2.00_dimer.out	-0.0181867	-0.0231101	-0.0206484	-0.0192163		0.262417	0.145302	0.203859
15_Peptide-Peptide_0.90_dimer.out	-494.085	-495.695	-495.779	-495.841	15_Peptide-Peptide_1.00_monomerA.out	-247.04	-247.841	-247.883	-247.914	15_Peptide-Peptide_1.00_monomerB.out	-247.04	-247.841	-247.883	-247.914	15_Peptide-Peptide_0.90_cpA.out	-247.041	-247.842	-247.885	-247.915	15_Peptide-Peptide_0.90_cpB.out	-247.04	-247.842	-247.885	-247.915		3.28605	8.64694	7.58801	8.48421		2.70728	6.59335	5.65754	6.36167		0.57877	2.05359	1.93046	2.12253	15_Peptide-Peptide_0.90_dimer.out	-0.162736	-0.231681	-0.197209	-0.112082		5.19816	3.6544	4.42628
15_Peptide-Peptide_0.95_dimer.out	-494.087	-495.696	-495.78	-495.842	15_Peptide-Peptide_1.00_monomerA.out	-247.04	-247.841	-247.883	-247.914	15_Peptide-Peptide_1.00_monomerB.out	-247.04	-247.841	-247.883	-247.914	15_Peptide-Peptide_0.95_cpA.out	-247.04	-247.842	-247.885	-247.915	15_Peptide-Peptide_0.95_cpB.out	-247.04	-247.842	-247.885	-247.915		4.45779	9.09761	8.223	9.00954		3.94511	7.30098	6.53178	7.15017		0.512687	1.79662	1.69122	1.85936	15_Peptide-Peptide_0.95_dimer.out	-0.0880696	-0.150809	-0.119439	-0.053324		4.55175	3.20507	3.87841
15_Peptide-Peptide_1.00_dimer.out	-494.088	-495.696	-495.78	-495.842	15_Peptide-Peptide_1.00_monomerA.out	-247.04	-247.841	-247.883	-247.914	15_Peptide-Peptide_1.00_monomerB.out	-247.04	-247.841	-247.883	-247.914	15_Peptide-Peptide_1.00_cpA.out	-247.04	-247.842	-247.885	-247.915	15_Peptide-Peptide_1.00_cpB.out	-247.04	-247.842	-247.885	-247.915		5.11314	9.14015	8.41494	9.10443		4.66374	7.56087	6.92661	7.46821		0.449397	1.57928	1.48834	1.63621	15_Peptide-Peptide_1.00_dimer.out	-0.0357251	-0.0926545	-0.0641898	-0.0134771		3.99129	2.80447	3.39788
15_Peptide-Peptide_1.05_dimer.out	-494.088	-495.696	-495.78	-495.842	15_Peptide-Peptide_1.00_monomerA.out	-247.04	-247.841	-247.883	-247.914	15_Peptide-Peptide_1.00_monomerB.out	-247.04	-247.841	-247.883	-247.914	15_Peptide-Peptide_1.05_cpA.out	-247.04	-247.842	-247.884	-247.915	15_Peptide-Peptide_1.05_cpB.out	-247.04	-247.842	-247.884	-247.915		5.41764	8.92307	8.31894	8.92303		5.02663	7.5274	7.00241	7.47564		0.391009	1.39567	1.31653	1.44739	15_Peptide-Peptide_1.05_dimer.out	-3.57235e-05	-0.0517582	-0.0258969	0.0124744		3.50539	2.44901	2.9772
15_Peptide-Peptide_1.10_dimer.out	-494.089	-495.695	-495.78	-495.841	15_Peptide-Peptide_1.00_monomerA.out	-247.04	-247.841	-247.883	-247.914	15_Peptide-Peptide_1.00_monomerB.out	-247.04	-247.841	-247.883	-247.914	15_Peptide-Peptide_1.10_cpA.out	-247.04	-247.842	-247.884	-247.915	15_Peptide-Peptide_1.10_cpB.out	-247.04	-247.842	-247.884	-247.915		5.48784	8.5491	8.04292	8.57251		5.14627	7.30658	6.86972	7.28272		0.341576	1.24252	1.1732	1.28979	15_Peptide-Peptide_1.10_dimer.out	0.0234138	-0.0238517	-0.000218951	0.0284557		3.08466	2.13646	2.61056
15_Peptide-Peptide_1.25_dimer.out	-494.088	-495.693	-495.778	-495.839	15_Peptide-Peptide_1.00_monomerA.out	-247.04	-247.841	-247.883	-247.914	15_Peptide-Peptide_1.00_monomerB.out	-247.04	-247.841	-247.883	-247.914	15_Peptide-Peptide_1.25_cpA.out	-247.04	-247.841	-247.884	-247.914	15_Peptide-Peptide_1.25_cpB.out	-247.04	-247.842	-247.884	-247.914		4.99779	7.0631	6.75507	7.11335		4.74919	6.14883	5.88899	6.16258		0.248597	0.914268	0.866079	0.950771	15_Peptide-Peptide_1.25_dimer.out	0.050254	0.0137509	0.0320024	0.0432618		2.11557	1.41339	1.76448
15_Peptide-Peptide_1.50_dimer.out	-494.086	-495.689	-495.774	-495.835	15_Peptide-Peptide_1.00_monomerA.out	-247.04	-247.841	-247.883	-247.914	15_Peptide-Peptide_1.00_monomerB.out	-247.04	-247.841	-247.883	-247.914	15_Peptide-Peptide_1.50_cpA.out	-247.04	-247.841	-247.884	-247.914	15_Peptide-Peptide_1.50_cpB.out	-247.04	-247.841	-247.884	-247.914		3.64823	4.74487	4.59521	4.78374		3.49318	4.1767	4.05648	4.19385		0.155044	0.568171	0.53873	0.589887	15_Peptide-Peptide_1.50_dimer.out	0.0388666	0.0171504	0.0280085	0.0311135		1.13551	0.700665	0.918087
15_Peptide-Peptide_2.00_dimer.out	-494.083	-495.685	-495.77	-495.83	15_Peptide-Peptide_1.00_monomerA.out	-247.04	-247.841	-247.883	-247.914	15_Peptide-Peptide_1.00_monomerB.out	-247.04	-247.841	-247.883	-247.914	15_Peptide-Peptide_2.00_cpA.out	-247.04	-247.841	-247.884	-247.914	15_Peptide-Peptide_2.00_cpB.out	-247.04	-247.841	-247.884	-247.914		1.68474	1.93752	1.90362	1.94729		1.62901	1.73763	1.71386	1.74082		0.0557295	0.199892	0.189763	0.206469	15_Peptide-Peptide_2.00_dimer.out	0.00976933	0.00319201	0.00648067	0.00782073		0.262551	0.111811	0.187181
16_Peptide-Water_0.90_dimer.out	-323.085	-324.108	-324.158	-324.194	16_Peptide-Water_1.00_monomerA.out	-247.04	-247.841	-247.883	-247.914	16_Peptide-Water_1.00_monomerB.out	-76.0408	-76.2589	-76.2669	-76.2718	16_Peptide-Water_0.90_cpA.out	-76.0413	-76.2603	-76.2682	-76.2733	16_Peptide-Water_0.90_cpB.out	-247.04	-247.841	-247.884	-247.914		2.67777	5.1764	4.66507	5.10561		2.22212	3.89144	3.45399	3.75819		0.455644	1.28496	1.21108	1.34742	16_Peptide-Water_0.90_dimer.out	-0.0707948	-0.133252	-0.102023	-0.0375493		2.42784	1.53607	1.98195
16_Peptide-Water_0.95_dimer.out	-323.086	-324.109	-324.159	-324.194	16_Peptide-Water_1.00_monomerA.out	-247.04	-247.841	-247.883	-247.914	16_Peptide-Water_1.00_monomerB.out	-76.0408	-76.2589	-76.2669	-76.2718	16_Peptide-Water_0.95_cpA.out	-76.0413	-76.2602	-76.2681	-76.2731	16_Peptide-Water_0.95_cpB.out	-247.04	-247.841	-247.884	-247.914		3.44053	5.52986	5.12556	5.50084		3.03605	4.3951	4.05584	4.30932		0.404476	1.13476	1.06972	1.19152	16_Peptide-Water_0.95_dimer.out	-0.029022	-0.085786	-0.057404	-0.00905676		2.06032	1.27327	1.66679
16_Peptide-Water_1.00_dimer.out	-323.087	-324.109	-324.159	-324.194	16_Peptide-Water_1.00_monomerA.out	-247.04	-247.841	-247.883	-247.914	16_Peptide-Water_1.00_monomerB.out	-76.0408	-76.2589	-76.2669	-76.2718	16_Peptide-Water_1.00_cpA.out	-76.0412	-76.26	-76.268	-76.273	16_Peptide-Water_1.00_cpB.out	-247.04	-247.841	-247.884	-247.914		3.82628	5.58543	5.26262	5.58304		3.4647	4.56962	4.30483	4.51527		0.361576	1.01581	0.957789	1.06777	16_Peptide-Water_1.00_dimer.out	-0.00238697	-0.0543492	-0.0283681	0.00706237		1.75676	1.05057	1.40367
16_Peptide-Water_1.05_dimer.out	-323.087	-324.108	-324.159	-324.194	16_Peptide-Water_1.00_monomerA.out	-247.04	-247.841	-247.883	-247.914	16_Peptide-Water_1.00_monomerB.out	-76.0408	-76.2589	-76.2669	-76.2718	16_Peptide-Water_1.05_cpA.out	-76.0412	-76.26	-76.2679	-76.2729	16_Peptide-Water_1.05_cpB.out	-247.04	-247.841	-247.884	-247.914		3.96743	5.45796	5.19766	5.4721		3.64018	4.53716	4.329	4.50313		0.327252	0.920803	0.868655	0.96897	16_Peptide-Water_1.05_dimer.out	0.0141409	-0.0340255	-0.00994228	0.0150859		1.50467	0.862955	1.18381
16_Peptide-Water_1.10_dimer.out	-323.087	-324.108	-324.158	-324.194	16_Peptide-Water_1.00_monomerA.out	-247.04	-247.841	-247.883	-247.914	16_Peptide-Water_1.00_monomerB.out	-76.0408	-76.2589	-76.2669	-76.2718	16_Peptide-Water_1.10_cpA.out	-76.0412	-76.2599	-76.2678	-76.2728	16_Peptide-Water_1.10_cpB.out	-247.04	-247.841	-247.884	-247.914		3.95235	5.22247	5.01022	5.2462		3.65141	4.37901	4.21394	4.3577		0.300933	0.843461	0.796282	0.888499	16_Peptide-Water_1.10_dimer.out	0.0237308	-0.0213073	0.00121177	0.0180507		1.29386	0.706289	1.00007
16_Peptide-Water_1.25_dimer.out	-323.086	-324.107	-324.157	-324.192	16_Peptide-Water_1.00_monomerA.out	-247.04	-247.841	-247.883	-247.914	16_Peptide-Water_1.00_monomerB.out	-76.0408	-76.2589	-76.2669	-76.2718	16_Peptide-Water_1.25_cpA.out	-76.0411	-76.2597	-76.2676	-76.2727	16_Peptide-Water_1.25_cpB.out	-247.04	-247.841	-247.884	-247.914		3.47488	4.27623	4.15211	4.30463		3.22852	3.61147	3.52451	3.60424		0.246361	0.664761	0.627605	0.700393	16_Peptide-Water_1.25_dimer.out	0.028401	-0.00723113	0.0105849	0.0142829		0.829746	0.375714	0.60273
16_Peptide-Water_1.50_dimer.out	-323.085	-324.104	-324.155	-324.19	16_Peptide-Water_1.00_monomerA.out	-247.04	-247.841	-247.883	-247.914	16_Peptide-Water_1.00_monomerB.out	-76.0408	-76.2589	-76.2669	-76.2718	16_Peptide-Water_1.50_cpA.out	-76.041	-76.2595	-76.2674	-76.2724	16_Peptide-Water_1.50_cpB.out	-247.04	-247.841	-247.884	-247.914		2.48421	2.86846	2.80529	2.88228		2.29729	2.40695	2.37146	2.3986		0.186921	0.461517	0.433828	0.48368	16_Peptide-Water_1.50_dimer.out	0.0138124	-0.00835013	0.00273113	0.00343016		0.398063	0.101304	0.249683
16_Peptide-Water_2.00_dimer.out	-323.083	-324.102	-324.153	-324.188	16_Peptide-Water_1.00_monomerA.out	-247.04	-247.841	-247.883	-247.914	16_Peptide-Water_1.00_monomerB.out	-76.0408	-76.2589	-76.2669	-76.2718	16_Peptide-Water_2.00_cpA.out	-76.0409	-76.2592	-76.2672	-76.2721	16_Peptide-Water_2.00_cpB.out	-247.04	-247.841	-247.884	-247.914		1.29271	1.38542	1.36286	1.38423		1.18881	1.15645	1.14921	1.14843		0.103905	0.228973	0.213649	0.235793	16_Peptide-Water_2.00_dimer.out	-0.00119445	-0.00801451	-0.00460448	-0.00103017		0.0915174	-0.0403702	0.0255736
17_Uracil-Uracil_BP_0.90_dimer.out	-825.071	-827.571	-827.618	-827.73	17_Uracil-Uracil_BP_1.00_monomerA.out	-412.527	-413.772	-413.797	-413.852	17_Uracil-Uracil_BP_1.00_monomerB.out	-412.527	-413.773	-413.797	-413.852	17_Uracil-Uracil_BP_0.90_cpA.out	-412.528	-413.775	-413.8	-413.855	17_Uracil-Uracil_BP_0.90_cpB.out	-412.528	-413.775	-413.799	-413.855		10.2589	16.1228	14.5336	15.9003		9.49197	13.1197	11.719	12.8058		0.766955	3.00312	2.8145	3.09457	17_Uracil-Uracil_BP_0.90_dimer.out	-0.222448	-0.31389	-0.268169	0.0511966		5.64141	3.3138	4.4776
17_Uracil-Uracil_BP_0.95_dimer.out	-825.074	-827.572	-827.62	-827.732	17_Uracil-Uracil_BP_1.00_monomerA.out	-412.527	-413.772	-413.797	-413.852	17_Uracil-Uracil_BP_1.00_monomerB.out	-412.527	-413.773	-413.797	-413.852	17_Uracil-Uracil_BP_0.95_cpA.out	-412.528	-413.775	-413.799	-413.854	17_Uracil-Uracil_BP_0.95_cpB.out	-412.528	-413.774	-413.799	-413.854		12.2912	17.28	16.0018	17.2124		11.607	14.6862	13.5684	14.5339		0.684224	2.59375	2.43341	2.67856	17_Uracil-Uracil_BP_0.95_dimer.out	-0.0675479	-0.152358	-0.109953	0.148725		4.92126	2.92692	3.92409
17_Uracil-Uracil_BP_1.00_dimer.out	-825.075	-827.573	-827.621	-827.732	17_Uracil-Uracil_BP_1.00_monomerA.out	-412.527	-413.772	-413.797	-413.852	17_Uracil-Uracil_BP_1.00_monomerB.out	-412.527	-413.773	-413.797	-413.852	17_Uracil-Uracil_BP_1.00_cpA.out	-412.528	-413.774	-413.799	-413.854	17_Uracil-Uracil_BP_1.00_cpB.out	-412.527	-413.774	-413.799	-413.854		13.2981	17.5318	16.5105	17.5773		12.6874	15.2814	14.3952	15.2475		0.610708	2.25042	2.1153	2.32982	17_Uracil-Uracil_BP_1.00_dimer.out	0.045496	-0.033907	0.00579446	0.21231		4.27926	2.56015	3.41971
17_Uracil-Uracil_BP_1.05_dimer.out	-825.076	-827.572	-827.621	-827.732	17_Uracil-Uracil_BP_1.00_monomerA.out	-412.527	-413.772	-413.797	-413.852	17_Uracil-Uracil_BP_1.00_monomerB.out	-412.527	-413.773	-413.797	-413.852	17_Uracil-Uracil_BP_1.05_cpA.out	-412.528	-413.774	-413.799	-413.854	17_Uracil-Uracil_BP_1.05_cpB.out	-412.527	-413.774	-413.799	-413.854		13.6031	17.1964	16.3834	17.3204		13.0633	15.2345	14.5357	15.2843		0.539841	1.96187	1.84773	2.03605	17_Uracil-Uracil_BP_1.05_dimer.out	0.123996	0.0498219	0.0869089	0.249186		3.71726	2.22105	2.96916
17_Uracil-Uracil_BP_1.10_dimer.out	-825.076	-827.571	-827.62	-827.731	17_Uracil-Uracil_BP_1.00_monomerA.out	-412.527	-413.772	-413.797	-413.852	17_Uracil-Uracil_BP_1.00_monomerB.out	-412.527	-413.773	-413.797	-413.852	17_Uracil-Uracil_BP_1.10_cpA.out	-412.528	-413.774	-413.799	-413.854	17_Uracil-Uracil_BP_1.10_cpB.out	-412.527	-413.774	-413.798	-413.854		13.4368	16.4959	15.8491	16.671		12.9665	14.7758	14.2264	14.8818		0.470339	1.72011	1.62271	1.78918	17_Uracil-Uracil_BP_1.10_dimer.out	0.175053	0.105988	0.14052	0.265926		3.23413	1.91529	2.57471
17_Uracil-Uracil_BP_1.25_dimer.out	-825.073	-827.566	-827.615	-827.726	17_Uracil-Uracil_BP_1.00_monomerA.out	-412.527	-413.772	-413.797	-413.852	17_Uracil-Uracil_BP_1.00_monomerB.out	-412.527	-413.773	-413.797	-413.852	17_Uracil-Uracil_BP_1.25_cpA.out	-412.527	-413.773	-413.798	-413.853	17_Uracil-Uracil_BP_1.25_cpB.out	-412.527	-413.773	-413.798	-413.853		11.5727	13.5068	13.1761	13.7324		11.2647	12.2916	12.0257	12.4616		0.30804	1.21523	1.15042	1.27082	17_Uracil-Uracil_BP_1.25_dimer.out	0.225591	0.170003	0.197797	0.249174		2.1597	1.19692	1.67831
17_Uracil-Uracil_BP_1.50_dimer.out	-825.067	-827.559	-827.608	-827.719	17_Uracil-Uracil_BP_1.00_monomerA.out	-412.527	-413.772	-413.797	-413.852	17_Uracil-Uracil_BP_1.00_monomerB.out	-412.527	-413.773	-413.797	-413.852	17_Uracil-Uracil_BP_1.50_cpA.out	-412.527	-413.773	-413.798	-413.853	17_Uracil-Uracil_BP_1.50_cpB.out	-412.527	-413.773	-413.798	-413.853		7.78785	8.72031	8.59904	8.89433		7.59096	7.95462	7.87407	8.09505		0.196892	0.765687	0.72497	0.799278	17_Uracil-Uracil_BP_1.50_dimer.out	0.174019	0.140427	0.157223	0.165969		1.10648	0.504092	0.805285
17_Uracil-Uracil_BP_2.00_dimer.out	-825.06	-827.551	-827.6	-827.71	17_Uracil-Uracil_BP_1.00_monomerA.out	-412.527	-413.772	-413.797	-413.852	17_Uracil-Uracil_BP_1.00_monomerB.out	-412.527	-413.773	-413.797	-413.852	17_Uracil-Uracil_BP_2.00_cpA.out	-412.527	-413.773	-413.798	-413.853	17_Uracil-Uracil_BP_2.00_cpB.out	-412.527	-413.773	-413.797	-413.852		3.36131	3.57057	3.54624	3.63882		3.27478	3.23673	3.23112	3.29179		0.0865258	0.33384	0.315123	0.34703	17_Uracil-Uracil_BP_2.00_dimer.out	0.0682519	0.0550614	0.0616566	0.0644644		0.277513	0.0170086	0.147261
18_Water-Pyridine_0.90_dimer.out	-322.769	-323.828	-323.865	-323.912	18_Water-Pyridine_1.00_monomerA.out	-76.0403	-76.2589	-76.2668	-76.2718	18_Water-Pyridine_1.00_monomerB.out	-246.723	-247.558	-247.589	-247.63	18_Water-Pyridine_0.90_cpA.out	-246.723	-247.559	-247.589	-247.631	18_Water-Pyridine_0.90_cpB.out	-76.0407	-76.2602	-76.2681	-76.2732		3.54097	6.90979	6.03969	6.59173		3.16044	5.57107	4.80064	5.20381		0.380524	1.33871	1.23905	1.38792	18_Water-Pyridine_0.90_dimer.out	-0.318059	-0.367265	-0.342662	-0.261627		3.05076	2.04336	2.54706
18_Water-Pyridine_0.95_dimer.out	-322.77	-323.828	-323.866	-323.913	18_Water-Pyridine_1.00_monomerA.out	-76.0403	-76.2589	-76.2668	-76.2718	18_Water-Pyridine_1.00_monomerB.out	-246.723	-247.558	-247.589	-247.63	18_Water-Pyridine_0.95_cpA.out	-246.723	-247.559	-247.589	-247.631	18_Water-Pyridine_0.95_cpB.out	-76.0407	-76.2601	-76.268	-76.2731		4.38965	7.28148	6.55933	7.04415		4.05035	6.11853	5.48012	5.8332		0.339295	1.16295	1.07921	1.21095	18_Water-Pyridine_0.95_dimer.out	-0.237327	-0.28533	-0.261329	-0.200884		2.65451	1.78285	2.21868
18_Water-Pyridine_1.00_dimer.out	-322.771	-323.828	-323.866	-323.913	18_Water-Pyridine_1.00_monomerA.out	-76.0403	-76.2589	-76.2668	-76.2718	18_Water-Pyridine_1.00_monomerB.out	-246.723	-247.558	-247.589	-247.63	18_Water-Pyridine_1.00_cpA.out	-246.723	-247.559	-247.589	-247.63	18_Water-Pyridine_1.00_cpB.out	-76.0406	-76.2599	-76.2678	-76.2729		4.80022	7.27858	6.67887	7.10203		4.49564	6.26663	5.7372	6.04403		0.304583	1.01195	0.941665	1.058	18_Water-Pyridine_1.00_dimer.out	-0.176551	-0.222609	-0.19958	-0.155713		2.30181	1.54839	1.9251
18_Water-Pyridine_1.05_dimer.out	-322.771	-323.828	-323.866	-323.913	18_Water-Pyridine_1.00_monomerA.out	-76.0403	-76.2589	-76.2668	-76.2718	18_Water-Pyridine_1.00_monomerB.out	-246.723	-247.558	-247.589	-247.63	18_Water-Pyridine_1.05_cpA.out	-246.723	-247.558	-247.589	-247.63	18_Water-Pyridine_1.05_cpB.out	-76.0406	-76.2598	-76.2677	-76.2728		4.91863	7.04078	6.54135	6.90866		4.64673	6.16121	5.72101	5.98571		0.271898	0.879569	0.820344	0.922948	18_Water-Pyridine_1.05_dimer.out	-0.132123	-0.175502	-0.153812	-0.122726		1.99003	1.33898	1.6645
18_Water-Pyridine_1.10_dimer.out	-322.771	-323.827	-323.865	-323.912	18_Water-Pyridine_1.00_monomerA.out	-76.0403	-76.2589	-76.2668	-76.2718	18_Water-Pyridine_1.00_monomerB.out	-246.723	-247.558	-247.589	-247.63	18_Water-Pyridine_1.10_cpA.out	-246.723	-247.558	-247.589	-247.63	18_Water-Pyridine_1.10_cpB.out	-76.0406	-76.2597	-76.2676	-76.2727		4.84643	6.66475	6.24664	6.56417		4.60636	5.90138	5.53341	5.76044		0.240076	0.763367	0.713235	0.803733	18_Water-Pyridine_1.10_dimer.out	-0.100576	-0.140942	-0.120759	-0.099106		1.71774	1.15408	1.43591
18_Water-Pyridine_1.25_dimer.out	-322.77	-323.825	-323.863	-323.91	18_Water-Pyridine_1.00_monomerA.out	-76.0403	-76.2589	-76.2668	-76.2718	18_Water-Pyridine_1.00_monomerB.out	-246.723	-247.558	-247.589	-247.63	18_Water-Pyridine_1.25_cpA.out	-246.723	-247.558	-247.589	-247.63	18_Water-Pyridine_1.25_cpB.out	-76.0405	-76.2594	-76.2673	-76.2724		4.10637	5.2589	5.00429	5.20588		3.94373	4.7567	4.53212	4.67135		0.16264	0.502195	0.472177	0.534536	18_Water-Pyridine_1.25_dimer.out	-0.053015	-0.0853555	-0.0691852	-0.0623466		1.09951	0.727617	0.913565
18_Water-Pyridine_1.50_dimer.out	-322.768	-323.822	-323.86	-323.907	18_Water-Pyridine_1.00_monomerA.out	-76.0403	-76.2589	-76.2668	-76.2718	18_Water-Pyridine_1.00_monomerB.out	-246.723	-247.558	-247.589	-247.63	18_Water-Pyridine_1.50_cpA.out	-246.723	-247.558	-247.589	-247.63	18_Water-Pyridine_1.50_cpB.out	-76.0404	-76.2591	-76.2671	-76.2721		2.68015	3.24788	3.12078	3.2145		2.59613	2.98466	2.86948	2.92799		0.0840149	0.263215	0.2513	0.286509	18_Water-Pyridine_1.50_dimer.out	-0.0333788	-0.0566725	-0.0450256	-0.0446762		0.534351	0.331857	0.433104
18_Water-Pyridine_2.00_dimer.out	-322.765	-323.819	-323.857	-323.904	18_Water-Pyridine_1.00_monomerA.out	-76.0403	-76.2589	-76.2668	-76.2718	18_Water-Pyridine_1.00_monomerB.out	-246.723	-247.558	-247.589	-247.63	18_Water-Pyridine_2.00_cpA.out	-246.723	-247.558	-247.589	-247.63	18_Water-Pyridine_2.00_cpB.out	-76.0403	-76.2589	-76.2669	-76.2719		1.14046	1.31759	1.27035	1.29334		1.1225	1.23054	1.18588	1.19594		0.0179553	0.0870551	0.0844625	0.0973944	18_Water-Pyridine_2.00_dimer.out	-0.0242526	-0.0345919	-0.0294222	-0.0310273		0.152882	0.0734429	0.113162
19_MeOH-Pyridine_0.90_dimer.out	-361.788	-362.988	-363.04	-363.093	19_MeOH-Pyridine_1.00_monomerA.out	-115.06	-115.418	-115.442	-115.452	19_MeOH-Pyridine_1.00_monomerB.out	-246.723	-247.558	-247.589	-247.63	19_MeOH-Pyridine_0.90_cpA.out	-246.723	-247.559	-247.59	-247.631	19_MeOH-Pyridine_0.90_cpB.out	-115.06	-115.419	-115.443	-115.453		2.92068	7.53463	6.36901	7.09657		2.56029	5.99643	4.95288	5.52801		0.360391	1.5382	1.41612	1.56856	19_MeOH-Pyridine_0.90_dimer.out	-0.43806	-0.468421	-0.45324	-0.366944		4.17589	2.96773	3.57181
19_MeOH-Pyridine_0.95_dimer.out	-361.789	-362.989	-363.042	-363.094	19_MeOH-Pyridine_1.00_monomerA.out	-115.06	-115.418	-115.442	-115.452	19_MeOH-Pyridine_1.00_monomerB.out	-246.723	-247.558	-247.589	-247.63	19_MeOH-Pyridine_0.95_cpA.out	-246.723	-247.559	-247.589	-247.631	19_MeOH-Pyridine_0.95_cpB.out	-115.06	-115.419	-115.443	-115.453		3.98682	7.98956	7.01343	7.65743		3.66575	6.64689	5.77563	6.28507		0.321068	1.34267	1.2378	1.37236	19_MeOH-Pyridine_0.95_dimer.out	-0.332135	-0.361827	-0.346981	-0.282657		3.67061	2.61932	3.14496
19_MeOH-Pyridine_1.00_dimer.out	-361.79	-362.989	-363.042	-363.094	19_MeOH-Pyridine_1.00_monomerA.out	-115.06	-115.418	-115.442	-115.452	19_MeOH-Pyridine_1.00_monomerB.out	-246.723	-247.558	-247.589	-247.63	19_MeOH-Pyridine_1.00_cpA.out	-246.723	-247.559	-247.589	-247.631	19_MeOH-Pyridine_1.00_cpB.out	-115.06	-115.419	-115.443	-115.453		4.5609	8.0289	7.21154	7.77857		4.27061	6.85284	6.12534	6.57377		0.29029	1.17606	1.0862	1.2048	19_MeOH-Pyridine_1.00_dimer.out	-0.25033	-0.279067	-0.264699	-0.21839		3.21767	2.30316	2.76041
19_MeOH-Pyridine_1.05_dimer.out	-361.791	-362.988	-363.042	-363.094	19_MeOH-Pyridine_1.00_monomerA.out	-115.06	-115.418	-115.442	-115.452	19_MeOH-Pyridine_1.00_monomerB.out	-246.723	-247.558	-247.589	-247.63	19_MeOH-Pyridine_1.05_cpA.out	-246.723	-247.559	-247.589	-247.631	19_MeOH-Pyridine_1.05_cpB.out	-115.06	-115.419	-115.443	-115.453		4.80171	7.80391	7.11821	7.61501		4.53865	6.77278	6.16425	6.55667		0.263061	1.03114	0.953956	1.05834	19_MeOH-Pyridine_1.05_dimer.out	-0.188899	-0.216103	-0.202501	-0.17022		2.81331	2.01803	2.41567
19_MeOH-Pyridine_1.10_dimer.out	-361.791	-362.988	-363.041	-363.093	19_MeOH-Pyridine_1.00_monomerA.out	-115.06	-115.418	-115.442	-115.452	19_MeOH-Pyridine_1.00_monomerB.out	-246.723	-247.558	-247.589	-247.63	19_MeOH-Pyridine_1.10_cpA.out	-246.723	-247.559	-247.589	-247.63	19_MeOH-Pyridine_1.10_cpB.out	-115.06	-115.419	-115.443	-115.453		4.81923	7.41957	6.84183	7.27552		4.58253	6.51539	6.00423	6.34602		0.236706	0.904181	0.837603	0.929504	19_MeOH-Pyridine_1.10_dimer.out	-0.144044	-0.169367	-0.156706	-0.134819		2.45629	1.76349	2.10989
19_MeOH-Pyridine_1.25_dimer.out	-361.79	-362.985	-363.039	-363.091	19_MeOH-Pyridine_1.00_monomerA.out	-115.06	-115.418	-115.442	-115.452	19_MeOH-Pyridine_1.00_monomerB.out	-246.723	-247.558	-247.589	-247.63	19_MeOH-Pyridine_1.25_cpA.out	-246.723	-247.558	-247.589	-247.63	19_MeOH-Pyridine_1.25_cpB.out	-115.06	-115.419	-115.442	-115.453		4.21585	5.91866	5.56129	5.84545		4.0482	5.30449	4.99013	5.21104		0.16765	0.614167	0.571158	0.634409	19_MeOH-Pyridine_1.25_dimer.out	-0.0732076	-0.0934501	-0.0833288	-0.0773983		1.6296	1.16285	1.39623
19_MeOH-Pyridine_1.50_dimer.out	-361.787	-362.982	-363.036	-363.088	19_MeOH-Pyridine_1.00_monomerA.out	-115.06	-115.418	-115.442	-115.452	19_MeOH-Pyridine_1.00_monomerB.out	-246.723	-247.558	-247.589	-247.63	19_MeOH-Pyridine_1.50_cpA.out	-246.723	-247.558	-247.589	-247.63	19_MeOH-Pyridine_1.50_cpB.out	-115.06	-115.418	-115.442	-115.452		2.81703	3.6983	3.51565	3.65498		2.72223	3.35559	3.19473	3.29799		0.0947963	0.342712	0.320922	0.356988	19_MeOH-Pyridine_1.50_dimer.out	-0.0433206	-0.0575966	-0.0504586	-0.0502016		0.837953	0.575762	0.706857
19_MeOH-Pyridine_2.00_dimer.out	-361.785	-362.978	-363.033	-363.084	19_MeOH-Pyridine_1.00_monomerA.out	-115.06	-115.418	-115.442	-115.452	19_MeOH-Pyridine_1.00_monomerB.out	-246.723	-247.558	-247.589	-247.63	19_MeOH-Pyridine_2.00_cpA.out	-246.723	-247.558	-247.589	-247.63	19_MeOH-Pyridine_2.00_cpB.out	-115.06	-115.418	-115.442	-115.452		1.21359	1.50236	1.43412	1.47229		1.18415	1.37602	1.31477	1.3389		0.0294436	0.126335	0.119353	0.133386	19_MeOH-Pyridine_2.00_dimer.out	-0.0300675	-0.0371186	-0.033593	-0.0356297		0.258696	0.154754	0.206725
20_AcOH-AcOH_0.90_dimer.out	-455.712	-457.064	-457.11	-457.16	20_AcOH-AcOH_1.00_monomerA.out	-227.845	-228.519	-228.542	-228.567	20_AcOH-AcOH_1.00_monomerB.out	-227.845	-228.519	-228.542	-228.567	20_AcOH-AcOH_0.90_cpA.out	-227.846	-228.521	-228.545	-228.569	20_AcOH-AcOH_0.90_cpB.out	-227.846	-228.521	-228.545	-228.569		12.9945	16.8975	15.7687	16.8584		12.2964	14.0171	13.0392	13.8454		0.698083	2.8804	2.72953	3.01298	20_AcOH-AcOH_0.90_dimer.out	-0.0390676	-0.171644	-0.105356	0.273624		3.86391	1.54902	2.70646
20_AcOH-AcOH_0.95_dimer.out	-455.715	-457.067	-457.112	-457.163	20_AcOH-AcOH_1.00_monomerA.out	-227.845	-228.519	-228.542	-228.567	20_AcOH-AcOH_1.00_monomerB.out	-227.845	-228.519	-228.542	-228.567	20_AcOH-AcOH_0.95_cpA.out	-227.846	-228.521	-228.544	-228.569	20_AcOH-AcOH_0.95_cpB.out	-227.846	-228.521	-228.544	-228.569		14.9486	18.3352	17.4123	18.4069		14.321	15.8658	15.0727	15.818		0.627538	2.46934	2.33969	2.58893	20_AcOH-AcOH_0.95_dimer.out	0.0716835	-0.0478995	0.011892	0.324777		3.45829	1.49691	2.4776
20_AcOH-AcOH_1.00_dimer.out	-455.716	-457.067	-457.113	-457.163	20_AcOH-AcOH_1.00_monomerA.out	-227.845	-228.519	-228.542	-228.567	20_AcOH-AcOH_1.00_monomerB.out	-227.845	-228.519	-228.542	-228.567	20_AcOH-AcOH_1.00_cpA.out	-227.846	-228.52	-228.544	-228.568	20_AcOH-AcOH_1.00_cpB.out	-227.846	-228.52	-228.544	-228.568		15.8218	18.7132	17.974	18.8687		15.2493	16.5944	15.9624	16.6397		0.572527	2.11879	2.01161	2.22897	20_AcOH-AcOH_1.00_dimer.out	0.155523	0.0453463	0.100435	0.355705		3.04688	1.39044	2.21866
20_AcOH-AcOH_1.05_dimer.out	-455.716	-457.067	-457.113	-457.163	20_AcOH-AcOH_1.00_monomerA.out	-227.845	-228.519	-228.542	-228.567	20_AcOH-AcOH_1.00_monomerB.out	-227.845	-228.519	-228.542	-228.567	20_AcOH-AcOH_1.05_cpA.out	-227.846	-228.52	-228.544	-228.568	20_AcOH-AcOH_1.05_cpB.out	-227.846	-228.52	-228.544	-228.568		15.9655	18.4045	17.8229	18.618		15.4424	16.5848	16.0899	16.6968		0.523059	1.81977	1.73301	1.92126	20_AcOH-AcOH_1.05_dimer.out	0.213484	0.112002	0.162743	0.368825		2.65253	1.25433	1.95343
20_AcOH-AcOH_1.10_dimer.out	-455.716	-457.066	-457.112	-457.162	20_AcOH-AcOH_1.00_monomerA.out	-227.845	-228.519	-228.542	-228.567	20_AcOH-AcOH_1.00_monomerB.out	-227.845	-228.519	-228.542	-228.567	20_AcOH-AcOH_1.10_cpA.out	-227.846	-228.52	-228.544	-228.568	20_AcOH-AcOH_1.10_cpB.out	-227.846	-228.52	-228.544	-228.568		15.6279	17.6717	17.2201	17.9204		15.155	16.1053	15.7238	16.2615		0.47287	1.56642	1.49629	1.65887	20_AcOH-AcOH_1.10_dimer.out	0.248735	0.156285	0.20251	0.367541		2.29253	1.10653	1.69953
20_AcOH-AcOH_1.25_dimer.out	-455.712	-457.06	-457.107	-457.157	20_AcOH-AcOH_1.00_monomerA.out	-227.845	-228.519	-228.542	-228.567	20_AcOH-AcOH_1.00_monomerB.out	-227.845	-228.519	-228.542	-228.567	20_AcOH-AcOH_1.25_cpA.out	-227.846	-228.52	-228.543	-228.568	20_AcOH-AcOH_1.25_cpB.out	-227.846	-228.52	-228.543	-228.568		13.258	14.4483	14.2492	14.7137		12.9375	13.4253	13.2668	13.6246		0.320419	1.02295	0.982428	1.0891	20_AcOH-AcOH_1.25_dimer.out	0.265477	0.199329	0.232403	0.313589		1.45579	0.687109	1.07145
20_AcOH-AcOH_1.50_dimer.out	-455.705	-457.052	-457.099	-457.148	20_AcOH-AcOH_1.00_monomerA.out	-227.845	-228.519	-228.542	-228.567	20_AcOH-AcOH_1.00_monomerB.out	-227.845	-228.519	-228.542	-228.567	20_AcOH-AcOH_1.50_cpA.out	-227.846	-228.519	-228.543	-228.567	20_AcOH-AcOH_1.50_cpB.out	-227.846	-228.519	-228.543	-228.567		8.79326	9.26635	9.22841	9.45659		8.60025	8.68023	8.66342	8.83302		0.193005	0.58612	0.564986	0.62357	20_AcOH-AcOH_1.50_dimer.out	0.190232	0.152782	0.171507	0.196671		0.66333	0.232764	0.448047
20_AcOH-AcOH_2.00_dimer.out	-455.697	-457.043	-457.091	-457.139	20_AcOH-AcOH_1.00_monomerA.out	-227.845	-228.519	-228.542	-228.567	20_AcOH-AcOH_1.00_monomerB.out	-227.845	-228.519	-228.542	-228.567	20_AcOH-AcOH_2.00_cpA.out	-227.846	-228.519	-228.542	-228.567	20_AcOH-AcOH_2.00_cpB.out	-227.846	-228.519	-228.542	-228.567		3.65094	3.66639	3.68174	3.73606		3.57287	3.44613	3.47082	3.50519		0.0780653	0.220264	0.21092	0.230869	20_AcOH-AcOH_2.00_dimer.out	0.0696671	0.059063	0.064365	0.0730415		0.0851237	-0.0676796	0.00872203
21_AcNH2-AcNH2_0.90_dimer.out	-416.035	-417.351	-417.408	-417.459	21_AcNH2-AcNH2_1.00_monomerA.out	-208.009	-208.664	-208.693	-208.718	21_AcNH2-AcNH2_1.00_monomerB.out	-208.009	-208.664	-208.693	-208.718	21_AcNH2-AcNH2_0.90_cpA.out	-208.01	-208.666	-208.695	-208.72	21_AcNH2-AcNH2_0.90_cpB.out	-208.01	-208.666	-208.695	-208.72		9.96145	14.597	13.5433	14.5749		9.29317	12.2559	11.3443	12.1577		0.668286	2.34108	2.19901	2.41715	21_AcNH2-AcNH2_0.90_dimer.out	-0.0221496	-0.0982181	-0.0601838	0.254376		4.61342	2.86456	3.73899
21_AcNH2-AcNH2_0.95_dimer.out	-416.038	-417.353	-417.411	-417.461	21_AcNH2-AcNH2_1.00_monomerA.out	-208.009	-208.664	-208.693	-208.718	21_AcNH2-AcNH2_1.00_monomerB.out	-208.009	-208.664	-208.693	-208.718	21_AcNH2-AcNH2_0.95_cpA.out	-208.01	-208.666	-208.695	-208.719	21_AcNH2-AcNH2_0.95_cpB.out	-208.01	-208.666	-208.695	-208.719		11.8706	15.7288	14.9113	15.8139		11.2763	13.75	13.0479	13.7634		0.59424	1.97882	1.86346	2.05043	21_AcNH2-AcNH2_0.95_dimer.out	0.0850566	0.0134487	0.0492526	0.304893		3.94331	2.48712	3.21521
21_AcNH2-AcNH2_1.00_dimer.out	-416.039	-417.353	-417.411	-417.461	21_AcNH2-AcNH2_1.00_monomerA.out	-208.009	-208.664	-208.693	-208.718	21_AcNH2-AcNH2_1.00_monomerB.out	-208.009	-208.664	-208.693	-208.718	21_AcNH2-AcNH2_1.00_cpA.out	-208.01	-208.665	-208.695	-208.719	21_AcNH2-AcNH2_1.00_cpB.out	-208.01	-208.665	-208.695	-208.719		12.7934	15.9954	15.3684	16.1526		12.2709	14.3168	13.7829	14.4069		0.522487	1.67858	1.5855	1.74578	21_AcNH2-AcNH2_1.00_dimer.out	0.157273	0.0900709	0.123672	0.329454		3.35923	2.13593	2.74758
21_AcNH2-AcNH2_1.05_dimer.out	-416.04	-417.353	-417.411	-417.461	21_AcNH2-AcNH2_1.00_monomerA.out	-208.009	-208.664	-208.693	-208.718	21_AcNH2-AcNH2_1.00_monomerB.out	-208.009	-208.664	-208.693	-208.718	21_AcNH2-AcNH2_1.05_cpA.out	-208.01	-208.665	-208.694	-208.719	21_AcNH2-AcNH2_1.05_cpB.out	-208.01	-208.665	-208.694	-208.719		13.048	15.7057	15.2294	15.9075		12.5989	14.2766	13.8759	14.4159		0.449124	1.42911	1.35348	1.49161	21_AcNH2-AcNH2_1.05_dimer.out	0.201759	0.139256	0.170507	0.334703		2.85947	1.81698	2.33823
21_AcNH2-AcNH2_1.10_dimer.out	-416.039	-417.352	-417.41	-417.46	21_AcNH2-AcNH2_1.00_monomerA.out	-208.009	-208.664	-208.693	-208.718	21_AcNH2-AcNH2_1.00_monomerB.out	-208.009	-208.664	-208.693	-208.718	21_AcNH2-AcNH2_1.10_cpA.out	-208.01	-208.665	-208.694	-208.719	21_AcNH2-AcNH2_1.10_cpB.out	-208.01	-208.665	-208.694	-208.719		12.8613	15.074	14.7145	15.2996		12.4832	13.8496	13.5523	14.0172		0.378131	1.2244	1.16214	1.28236	21_AcNH2-AcNH2_1.10_dimer.out	0.225545	0.167586	0.196565	0.32662		2.43825	1.53402	1.98613
21_AcNH2-AcNH2_1.25_dimer.out	-416.037	-417.348	-417.406	-417.456	21_AcNH2-AcNH2_1.00_monomerA.out	-208.009	-208.664	-208.693	-208.718	21_AcNH2-AcNH2_1.00_monomerB.out	-208.009	-208.664	-208.693	-208.718	21_AcNH2-AcNH2_1.25_cpA.out	-208.01	-208.665	-208.694	-208.719	21_AcNH2-AcNH2_1.25_cpB.out	-208.01	-208.665	-208.694	-208.719		11.0663	12.3656	12.2177	12.5928		10.8291	11.5379	11.4271	11.7181		0.237274	0.827633	0.790657	0.874706	21_AcNH2-AcNH2_1.25_dimer.out	0.227194	0.180122	0.203658	0.266386		1.52643	0.889003	1.20772
21_AcNH2-AcNH2_1.50_dimer.out	-416.031	-417.341	-417.4	-417.449	21_AcNH2-AcNH2_1.00_monomerA.out	-208.009	-208.664	-208.693	-208.718	21_AcNH2-AcNH2_1.00_monomerB.out	-208.009	-208.664	-208.693	-208.718	21_AcNH2-AcNH2_1.50_cpA.out	-208.01	-208.664	-208.694	-208.718	21_AcNH2-AcNH2_1.50_cpB.out	-208.01	-208.664	-208.694	-208.718		7.54135	8.06555	8.04202	8.21948		7.39463	7.57421	7.5712	7.70012		0.146722	0.49134	0.470815	0.519365	21_AcNH2-AcNH2_1.50_dimer.out	0.15393	0.125905	0.139918	0.162235		0.678132	0.30549	0.491811
21_AcNH2-AcNH2_2.00_dimer.out	-416.024	-417.333	-417.392	-417.441	21_AcNH2-AcNH2_1.00_monomerA.out	-208.009	-208.664	-208.693	-208.718	21_AcNH2-AcNH2_1.00_monomerB.out	-208.009	-208.664	-208.693	-208.718	21_AcNH2-AcNH2_2.00_cpA.out	-208.01	-208.664	-208.694	-208.718	21_AcNH2-AcNH2_2.00_cpB.out	-208.01	-208.664	-208.694	-208.718		3.09111	3.087	3.10316	3.13196		3.03741	2.92697	2.95033	2.96498		0.0536963	0.160032	0.15283	0.166979	21_AcNH2-AcNH2_2.00_dimer.out	0.0449534	0.0380056	0.0414795	0.0513058		0.0408446	-0.0724386	-0.015797
22_AcOH-Uracil_0.90_dimer.out	-640.393	-642.319	-642.366	-642.447	22_AcOH-Uracil_1.00_monomerA.out	-227.846	-228.519	-228.542	-228.567	22_AcOH-Uracil_1.00_monomerB.out	-412.527	-413.772	-413.797	-413.852	22_AcOH-Uracil_0.90_cpA.out	-412.528	-413.775	-413.799	-413.854	22_AcOH-Uracil_0.90_cpB.out	-227.846	-228.521	-228.545	-228.569		13.0777	17.759	16.4711	17.6606		12.3242	14.8052	13.6845	14.5909		0.753491	2.95377	2.7866	3.06961	22_AcOH-Uracil_0.90_dimer.out	-0.0984517	-0.214296	-0.156374	0.191051		4.58282	2.2667	3.42476
22_AcOH-Uracil_0.95_dimer.out	-640.397	-642.321	-642.368	-642.449	22_AcOH-Uracil_1.00_monomerA.out	-227.846	-228.519	-228.542	-228.567	22_AcOH-Uracil_1.00_monomerB.out	-412.527	-413.772	-413.797	-413.852	22_AcOH-Uracil_0.95_cpA.out	-412.527	-413.774	-413.799	-413.854	22_AcOH-Uracil_0.95_cpB.out	-227.846	-228.521	-228.544	-228.569		15.0888	19.0669	18.0388	19.1049		14.412	16.5225	15.637	16.4546		0.676817	2.54441	2.40172	2.6503	22_AcOH-Uracil_0.95_dimer.out	0.0380513	-0.0678383	-0.0148935	0.270341		4.01613	2.04264	3.02939
22_AcOH-Uracil_1.00_dimer.out	-640.398	-642.322	-642.369	-642.45	22_AcOH-Uracil_1.00_monomerA.out	-227.846	-228.519	-228.542	-228.567	22_AcOH-Uracil_1.00_monomerB.out	-412.527	-413.772	-413.797	-413.852	22_AcOH-Uracil_1.00_cpA.out	-412.527	-413.774	-413.799	-413.854	22_AcOH-Uracil_1.00_cpB.out	-227.846	-228.52	-228.544	-228.569		16.0435	19.3893	18.5828	19.5292		15.4307	17.1921	16.5046	17.2337		0.612751	2.19723	2.07818	2.29544	22_AcOH-Uracil_1.00_dimer.out	0.139854	0.0416413	0.0907478	0.321907		3.48569	1.803	2.64434
22_AcOH-Uracil_1.05_dimer.out	-640.398	-642.321	-642.369	-642.449	22_AcOH-Uracil_1.00_monomerA.out	-227.846	-228.519	-228.542	-228.567	22_AcOH-Uracil_1.00_monomerB.out	-412.527	-413.772	-413.797	-413.852	22_AcOH-Uracil_1.05_cpA.out	-412.527	-413.774	-413.798	-413.854	22_AcOH-Uracil_1.05_cpB.out	-227.846	-228.52	-228.544	-228.568		16.2756	19.0688	18.4464	19.2797		15.7227	17.1659	16.6421	17.2859		0.552855	1.90289	1.80433	1.99374	22_AcOH-Uracil_1.05_dimer.out	0.210873	0.120015	0.165444	0.350484		3.00409	1.56321	2.28365
22_AcOH-Uracil_1.10_dimer.out	-640.398	-642.32	-642.368	-642.448	22_AcOH-Uracil_1.00_monomerA.out	-227.846	-228.519	-228.542	-228.567	22_AcOH-Uracil_1.00_monomerB.out	-412.527	-413.772	-413.797	-413.852	22_AcOH-Uracil_1.10_cpA.out	-412.527	-413.773	-413.798	-413.853	22_AcOH-Uracil_1.10_cpB.out	-227.846	-228.52	-228.544	-228.568		16.0225	18.3462	17.8728	18.6024		15.5298	16.6917	16.3004	16.8646		0.492708	1.65448	1.57238	1.73782	22_AcOH-Uracil_1.10_dimer.out	0.256207	0.172866	0.214537	0.360991		2.57988	1.33477	1.95733
22_AcOH-Uracil_1.25_dimer.out	-640.395	-642.315	-642.363	-642.443	22_AcOH-Uracil_1.00_monomerA.out	-227.846	-228.519	-228.542	-228.567	22_AcOH-Uracil_1.00_monomerB.out	-412.527	-413.772	-413.797	-413.852	22_AcOH-Uracil_1.25_cpA.out	-412.527	-413.773	-413.798	-413.853	22_AcOH-Uracil_1.25_cpB.out	-227.846	-228.52	-228.543	-228.568		13.8476	15.1781	14.9899	15.4714		13.5185	14.052	13.9154	14.2828		0.329025	1.1261	1.07449	1.18865	22_AcOH-Uracil_1.25_dimer.out	0.293376	0.230825	0.2621	0.329441		1.62387	0.764246	1.19406
22_AcOH-Uracil_1.50_dimer.out	-640.388	-642.307	-642.355	-642.435	22_AcOH-Uracil_1.00_monomerA.out	-227.846	-228.519	-228.542	-228.567	22_AcOH-Uracil_1.00_monomerB.out	-412.527	-413.772	-413.797	-413.852	22_AcOH-Uracil_1.50_cpA.out	-412.527	-413.773	-413.798	-413.853	22_AcOH-Uracil_1.50_cpB.out	-227.846	-228.519	-228.543	-228.567		9.52495	10.01	10.0026	10.2386		9.31962	9.32806	9.35054	9.51967		0.205323	0.68193	0.652066	0.718978	22_AcOH-Uracil_1.50_dimer.out	0.22865	0.191602	0.210126	0.226405		0.713697	0.200042	0.45687
22_AcOH-Uracil_2.00_dimer.out	-640.379	-642.298	-642.346	-642.426	22_AcOH-Uracil_1.00_monomerA.out	-227.846	-228.519	-228.542	-228.567	22_AcOH-Uracil_1.00_monomerB.out	-412.527	-413.772	-413.797	-413.852	22_AcOH-Uracil_2.00_cpA.out	-412.527	-413.772	-413.797	-413.852	22_AcOH-Uracil_2.00_cpB.out	-227.846	-228.519	-228.543	-228.567		4.3226	4.26207	4.31194	4.36471		4.23228	3.98245	4.04512	4.07212		0.0903192	0.27962	0.266825	0.292589	22_AcOH-Uracil_2.00_dimer.out	0.102643	0.0896741	0.0961588	0.100636		0.0421066	-0.160163	-0.0590284
23_AcNH2-Uracil_0.90_dimer.out	-620.556	-622.464	-622.516	-622.598	23_AcNH2-Uracil_1.00_monomerA.out	-208.009	-208.664	-208.693	-208.718	23_AcNH2-Uracil_1.00_monomerB.out	-412.527	-413.772	-413.797	-413.852	23_AcNH2-Uracil_0.90_cpA.out	-412.527	-413.774	-413.799	-413.854	23_AcNH2-Uracil_0.90_cpB.out	-208.01	-208.666	-208.696	-208.72		12.7874	17.6764	16.3739	17.5386		12.053	14.9324	13.8024	14.7138		0.734418	2.74403	2.57146	2.82486	23_AcNH2-Uracil_0.90_dimer.out	-0.137779	-0.218608	-0.178193	0.156802		4.7512	2.66076	3.70598
23_AcNH2-Uracil_0.95_dimer.out	-620.56	-622.466	-622.519	-622.6	23_AcNH2-Uracil_1.00_monomerA.out	-208.009	-208.664	-208.693	-208.718	23_AcNH2-Uracil_1.00_monomerB.out	-412.527	-413.772	-413.797	-413.852	23_AcNH2-Uracil_0.95_cpA.out	-412.527	-413.774	-413.799	-413.854	23_AcNH2-Uracil_0.95_cpB.out	-208.01	-208.666	-208.695	-208.72		14.7658	18.862	17.8315	18.8622		14.1093	16.5003	15.6164	16.4259		0.656531	2.36166	2.2151	2.43631	23_AcNH2-Uracil_0.95_dimer.out	0.000219395	-0.0744342	-0.0371074	0.239816		4.09639	2.31661	3.2065
23_AcNH2-Uracil_1.00_dimer.out	-620.561	-622.467	-622.52	-622.6	23_AcNH2-Uracil_1.00_monomerA.out	-208.009	-208.664	-208.693	-208.718	23_AcNH2-Uracil_1.00_monomerB.out	-412.527	-413.772	-413.797	-413.852	23_AcNH2-Uracil_1.00_cpA.out	-412.527	-413.774	-413.798	-413.854	23_AcNH2-Uracil_1.00_cpB.out	-208.01	-208.666	-208.695	-208.72		15.7504	19.1586	18.3553	19.2611		15.1655	17.12	16.4397	17.1526		0.584913	2.03859	1.91558	2.10853	23_AcNH2-Uracil_1.00_dimer.out	0.102517	0.0325767	0.0675466	0.293984		3.51067	1.98706	2.74887
23_AcNH2-Uracil_1.05_dimer.out	-620.562	-622.466	-622.519	-622.6	23_AcNH2-Uracil_1.00_monomerA.out	-208.009	-208.664	-208.693	-208.718	23_AcNH2-Uracil_1.00_monomerB.out	-412.527	-413.772	-413.797	-413.852	23_AcNH2-Uracil_1.05_cpA.out	-412.527	-413.774	-413.798	-413.853	23_AcNH2-Uracil_1.05_cpB.out	-208.01	-208.665	-208.695	-208.719		16.0467	18.8685	18.2515	19.043		15.5315	17.1026	16.5888	17.2116		0.515199	1.76584	1.66272	1.83142	23_AcNH2-Uracil_1.05_dimer.out	0.174556	0.108981	0.141769	0.32498		2.99638	1.68016	2.33827
23_AcNH2-Uracil_1.10_dimer.out	-620.561	-622.465	-622.519	-622.599	23_AcNH2-Uracil_1.00_monomerA.out	-208.009	-208.664	-208.693	-208.718	23_AcNH2-Uracil_1.00_monomerB.out	-412.527	-413.772	-413.797	-413.852	23_AcNH2-Uracil_1.10_cpA.out	-412.527	-413.773	-413.798	-413.853	23_AcNH2-Uracil_1.10_cpB.out	-208.01	-208.665	-208.695	-208.719		15.8744	18.206	17.7387	18.428		15.4271	16.6685	16.2883	16.8292		0.447295	1.53746	1.4504	1.59881	23_AcNH2-Uracil_1.10_dimer.out	0.222056	0.160705	0.191381	0.338146		2.55364	1.40212	1.97788
23_AcNH2-Uracil_1.25_dimer.out	-620.558	-622.46	-622.514	-622.595	23_AcNH2-Uracil_1.00_monomerA.out	-208.009	-208.664	-208.693	-208.718	23_AcNH2-Uracil_1.00_monomerB.out	-412.527	-413.772	-413.797	-413.852	23_AcNH2-Uracil_1.25_cpA.out	-412.527	-413.773	-413.798	-413.853	23_AcNH2-Uracil_1.25_cpB.out	-208.01	-208.665	-208.694	-208.719		13.9575	15.2618	15.081	15.5323		13.6693	14.1972	14.0722	14.4174		0.288155	1.06456	1.00884	1.11486	23_AcNH2-Uracil_1.25_dimer.out	0.27044	0.220145	0.245293	0.316326		1.57479	0.748094	1.16144
23_AcNH2-Uracil_1.50_dimer.out	-620.552	-622.453	-622.507	-622.587	23_AcNH2-Uracil_1.00_monomerA.out	-208.009	-208.664	-208.693	-208.718	23_AcNH2-Uracil_1.00_monomerB.out	-412.527	-413.772	-413.797	-413.852	23_AcNH2-Uracil_1.50_cpA.out	-412.527	-413.773	-413.797	-413.853	23_AcNH2-Uracil_1.50_cpB.out	-208.01	-208.664	-208.694	-208.718		9.94744	10.3697	10.3736	10.5911		9.76475	9.70918	9.74568	9.89856		0.182696	0.660564	0.627895	0.692522	23_AcNH2-Uracil_1.50_dimer.out	0.221338	0.18938	0.205359	0.226184		0.643641	0.133815	0.388728
23_AcNH2-Uracil_2.00_dimer.out	-620.544	-622.444	-622.498	-622.578	23_AcNH2-Uracil_1.00_monomerA.out	-208.009	-208.664	-208.693	-208.718	23_AcNH2-Uracil_1.00_monomerB.out	-412.527	-413.772	-413.797	-413.852	23_AcNH2-Uracil_2.00_cpA.out	-412.527	-413.772	-413.797	-413.852	23_AcNH2-Uracil_2.00_cpB.out	-208.009	-208.664	-208.694	-208.718		4.92225	4.77438	4.83941	4.88032		4.8369	4.49459	4.57324	4.58852		0.0853495	0.279792	0.266167	0.291795	23_AcNH2-Uracil_2.00_dimer.out	0.105933	0.0939295	0.099931	0.107887		-0.0419349	-0.248381	-0.145158
24_Benzene-Benzene_pi-pi_0.90_dimer.out	-461.435	-463.077	-463.142	-463.225	24_Benzene-Benzene_pi-pi_1.00_monomerA.out	-230.727	-231.533	-231.57	-231.609	24_Benzene-Benzene_pi-pi_1.00_monomerB.out	-230.727	-231.533	-231.57	-231.609	24_Benzene-Benzene_pi-pi_0.90_cpA.out	-230.728	-231.537	-231.574	-231.613	24_Benzene-Benzene_pi-pi_0.90_cpB.out	-230.728	-231.537	-231.574	-231.613		-11.672	7.19561	1.20915	3.66167		-13.2129	2.23955	-3.39262	-1.45841		1.5409	4.95605	4.60178	5.12008	24_Benzene-Benzene_pi-pi_0.90_dimer.out	-3.53393	-3.69796	-3.61595	-4.07727		15.3337	11.7545	13.5441
24_Benzene-Benzene_pi-pi_0.95_dimer.out	-461.442	-463.078	-463.145	-463.227	24_Benzene-Benzene_pi-pi_1.00_monomerA.out	-230.727	-231.533	-231.57	-231.609	24_Benzene-Benzene_pi-pi_1.00_monomerB.out	-230.727	-231.533	-231.57	-231.609	24_Benzene-Benzene_pi-pi_0.95_cpA.out	-230.728	-231.536	-231.573	-231.613	24_Benzene-Benzene_pi-pi_0.95_cpB.out	-230.728	-231.536	-231.573	-231.613		-6.99486	7.69921	3.05989	4.98799		-8.23553	3.78571	-0.582769	0.939424		1.24067	3.9135	3.64266	4.04857	24_Benzene-Benzene_pi-pi_0.95_dimer.out	-2.71122	-2.84628	-2.77875	-3.13316		11.9829	9.17496	10.5789
24_Benzene-Benzene_pi-pi_1.00_dimer.out	-461.447	-463.077	-463.146	-463.227	24_Benzene-Benzene_pi-pi_1.00_monomerA.out	-230.727	-231.533	-231.57	-231.609	24_Benzene-Benzene_pi-pi_1.00_monomerB.out	-230.727	-231.533	-231.57	-231.609	24_Benzene-Benzene_pi-pi_1.00_cpA.out	-230.728	-231.535	-231.572	-231.612	24_Benzene-Benzene_pi-pi_1.00_cpB.out	-230.728	-231.535	-231.572	-231.612		-4.2351	7.26582	3.64461	5.16809		-5.23376	4.16832	0.756441	1.95969		0.998663	3.0975	2.88817	3.2084	24_Benzene-Benzene_pi-pi_1.00_dimer.out	-2.09774	-2.20863	-2.15318	-2.42563		9.40318	7.19345	8.29832
24_Benzene-Benzene_pi-pi_1.05_dimer.out	-461.449	-463.076	-463.146	-463.226	24_Benzene-Benzene_pi-pi_1.00_monomerA.out	-230.727	-231.533	-231.57	-231.609	24_Benzene-Benzene_pi-pi_1.00_monomerB.out	-230.727	-231.533	-231.57	-231.609	24_Benzene-Benzene_pi-pi_1.05_cpA.out	-230.727	-231.535	-231.572	-231.611	24_Benzene-Benzene_pi-pi_1.05_cpB.out	-230.727	-231.535	-231.572	-231.611		-2.59842	6.44996	3.60551	4.81512		-3.40968	3.97831	1.29815	2.25217		0.811267	2.47165	2.30736	2.56296	24_Benzene-Benzene_pi-pi_1.05_dimer.out	-1.63484	-1.72614	-1.68049	-1.89087		7.41354	5.66185	6.53769
24_Benzene-Benzene_pi-pi_1.10_dimer.out	-461.451	-463.075	-463.145	-463.226	24_Benzene-Benzene_pi-pi_1.00_monomerA.out	-230.727	-231.533	-231.57	-231.609	24_Benzene-Benzene_pi-pi_1.00_monomerB.out	-230.727	-231.533	-231.57	-231.609	24_Benzene-Benzene_pi-pi_1.10_cpA.out	-230.727	-231.534	-231.571	-231.611	24_Benzene-Benzene_pi-pi_1.10_cpB.out	-230.727	-231.534	-231.571	-231.611		-1.62226	5.54148	3.2928	4.25839		-2.29146	3.54276	1.42544	2.18412		0.669191	1.99872	1.86736	2.07428	24_Benzene-Benzene_pi-pi_1.10_dimer.out	-1.28309	-1.35865	-1.32087	-1.4845		5.88066	4.47557	5.17811
24_Benzene-Benzene_pi-pi_1.25_dimer.out	-461.453	-463.071	-463.143	-463.223	24_Benzene-Benzene_pi-pi_1.00_monomerA.out	-230.727	-231.533	-231.57	-231.609	24_Benzene-Benzene_pi-pi_1.00_monomerB.out	-230.727	-231.533	-231.57	-231.609	24_Benzene-Benzene_pi-pi_1.25_cpA.out	-230.727	-231.534	-231.571	-231.61	24_Benzene-Benzene_pi-pi_1.25_cpB.out	-230.727	-231.534	-231.571	-231.61		-0.458927	3.17132	2.04519	2.54247		-0.839587	2.05238	1.00023	1.37986		0.380661	1.11893	1.04496	1.16261	24_Benzene-Benzene_pi-pi_1.25_dimer.out	-0.628852	-0.672526	-0.650689	-0.72957		3.00139	2.21945	2.61042
24_Benzene-Benzene_pi-pi_1.50_dimer.out	-461.453	-463.068	-463.141	-463.22	24_Benzene-Benzene_pi-pi_1.00_monomerA.out	-230.727	-231.533	-231.57	-231.609	24_Benzene-Benzene_pi-pi_1.00_monomerB.out	-230.727	-231.533	-231.57	-231.609	24_Benzene-Benzene_pi-pi_1.50_cpA.out	-230.727	-231.533	-231.57	-231.61	24_Benzene-Benzene_pi-pi_1.50_cpB.out	-230.727	-231.533	-231.57	-231.61		-0.127696	1.18336	0.801199	0.985917		-0.287147	0.676743	0.326395	0.4518		0.15945	0.50662	0.474803	0.534117	24_Benzene-Benzene_pi-pi_1.50_dimer.out	-0.197446	-0.224944	-0.211195	-0.243342		1.11361	0.738947	0.92628
24_Benzene-Benzene_pi-pi_2.00_dimer.out	-461.453	-463.066	-463.14	-463.219	24_Benzene-Benzene_pi-pi_1.00_monomerA.out	-230.727	-231.533	-231.57	-231.609	24_Benzene-Benzene_pi-pi_1.00_monomerB.out	-230.727	-231.533	-231.57	-231.609	24_Benzene-Benzene_pi-pi_2.00_cpA.out	-230.727	-231.533	-231.57	-231.609	24_Benzene-Benzene_pi-pi_2.00_cpB.out	-230.727	-231.533	-231.57	-231.609		-0.0516529	0.213183	0.139017	0.176995		-0.0765445	0.102424	0.0387036	0.0614491		0.0248916	0.110759	0.100313	0.115546	24_Benzene-Benzene_pi-pi_2.00_dimer.out	-0.0361876	-0.0409749	-0.0385813	-0.0459843		0.228648	0.137994	0.183321
25_Pyridine-Pyridine_pi-pi_0.90_dimer.out	-493.428	-495.13	-495.181	-495.267	25_Pyridine-Pyridine_pi-pi_1.00_monomerA.out	-246.723	-247.558	-247.589	-247.63	25_Pyridine-Pyridine_pi-pi_1.00_monomerB.out	-246.723	-247.558	-247.589	-247.63	25_Pyridine-Pyridine_pi-pi_0.90_cpA.out	-246.724	-247.562	-247.592	-247.634	25_Pyridine-Pyridine_pi-pi_0.90_cpB.out	-246.724	-247.562	-247.592	-247.634		-11.0578	8.42771	2.12139	4.63708		-12.3934	3.39161	-2.54214	-0.558919		1.33558	5.0361	4.66352	5.196	25_Pyridine-Pyridine_pi-pi_0.90_dimer.out	-3.79063	-3.95053	-3.87058	-4.33368		15.6949	11.8345	13.7647
25_Pyridine-Pyridine_pi-pi_0.95_dimer.out	-493.436	-495.131	-495.184	-495.27	25_Pyridine-Pyridine_pi-pi_1.00_monomerA.out	-246.723	-247.558	-247.589	-247.63	25_Pyridine-Pyridine_pi-pi_1.00_monomerB.out	-246.723	-247.558	-247.589	-247.63	25_Pyridine-Pyridine_pi-pi_0.95_cpA.out	-246.724	-247.561	-247.592	-247.633	25_Pyridine-Pyridine_pi-pi_0.95_cpB.out	-246.724	-247.561	-247.592	-247.633		-6.34205	9.01769	4.07958	6.07483		-7.42942	4.96542	0.322101	1.89281		1.08737	4.05228	3.75748	4.18202	25_Pyridine-Pyridine_pi-pi_0.95_dimer.out	-2.94287	-3.07261	-3.00774	-3.3657		12.4169	9.32223	10.8696
25_Pyridine-Pyridine_pi-pi_1.00_dimer.out	-493.44	-495.13	-495.185	-495.27	25_Pyridine-Pyridine_pi-pi_1.00_monomerA.out	-246.723	-247.558	-247.589	-247.63	25_Pyridine-Pyridine_pi-pi_1.00_monomerB.out	-246.723	-247.558	-247.589	-247.63	25_Pyridine-Pyridine_pi-pi_1.00_cpA.out	-246.724	-247.561	-247.591	-247.633	25_Pyridine-Pyridine_pi-pi_1.00_cpB.out	-246.724	-247.561	-247.591	-247.633		-3.53259	8.61297	4.72116	6.30781		-4.41669	5.35591	1.69896	2.94698		0.884097	3.25706	3.0222	3.36083	25_Pyridine-Pyridine_pi-pi_1.00_dimer.out	-2.30516	-2.40893	-2.35705	-2.6317		9.8404	7.36367	8.60203
25_Pyridine-Pyridine_pi-pi_1.05_dimer.out	-493.443	-495.129	-495.185	-495.27	25_Pyridine-Pyridine_pi-pi_1.00_monomerA.out	-246.723	-247.558	-247.589	-247.63	25_Pyridine-Pyridine_pi-pi_1.00_monomerB.out	-246.723	-247.558	-247.589	-247.63	25_Pyridine-Pyridine_pi-pi_1.05_cpA.out	-246.724	-247.56	-247.591	-247.632	25_Pyridine-Pyridine_pi-pi_1.05_cpB.out	-246.724	-247.56	-247.591	-247.632		-1.87158	7.76414	4.67918	5.94409		-2.59168	5.14194	2.24577	3.23949		0.720091	2.6222	2.43342	2.7046	25_Pyridine-Pyridine_pi-pi_1.05_dimer.out	-1.82005	-1.90245	-1.86125	-2.0714		7.81568	5.83116	6.82342
25_Pyridine-Pyridine_pi-pi_1.10_dimer.out	-493.444	-495.127	-495.184	-495.269	25_Pyridine-Pyridine_pi-pi_1.00_monomerA.out	-246.723	-247.558	-247.589	-247.63	25_Pyridine-Pyridine_pi-pi_1.00_monomerB.out	-246.723	-247.558	-247.589	-247.63	25_Pyridine-Pyridine_pi-pi_1.10_cpA.out	-246.723	-247.56	-247.59	-247.632	25_Pyridine-Pyridine_pi-pi_1.10_cpB.out	-246.723	-247.56	-247.59	-247.632		-0.900268	6.77753	4.31753	5.32927		-1.4907	4.65422	2.34769	3.14058		0.590436	2.12331	1.96985	2.18869	25_Pyridine-Pyridine_pi-pi_1.10_dimer.out	-1.44826	-1.51364	-1.48095	-1.64189		6.22954	4.63128	5.43041
25_Pyridine-Pyridine_pi-pi_1.25_dimer.out	-493.446	-495.123	-495.182	-495.266	25_Pyridine-Pyridine_pi-pi_1.00_monomerA.out	-246.723	-247.558	-247.589	-247.63	25_Pyridine-Pyridine_pi-pi_1.00_monomerB.out	-246.723	-247.558	-247.589	-247.63	25_Pyridine-Pyridine_pi-pi_1.25_cpA.out	-246.723	-247.559	-247.59	-247.631	25_Pyridine-Pyridine_pi-pi_1.25_cpB.out	-246.723	-247.559	-247.59	-247.631		0.149385	4.16521	2.87358	3.40439		-0.188325	2.97209	1.76985	2.17772		0.33771	1.19312	1.10374	1.22667	25_Pyridine-Pyridine_pi-pi_1.25_dimer.out	-0.76082	-0.794367	-0.777593	-0.850751		3.255	2.36605	2.81052
25_Pyridine-Pyridine_pi-pi_1.50_dimer.out	-493.446	-495.119	-495.179	-495.262	25_Pyridine-Pyridine_pi-pi_1.00_monomerA.out	-246.723	-247.558	-247.589	-247.63	25_Pyridine-Pyridine_pi-pi_1.00_monomerB.out	-246.723	-247.558	-247.589	-247.63	25_Pyridine-Pyridine_pi-pi_1.50_cpA.out	-246.723	-247.558	-247.589	-247.63	25_Pyridine-Pyridine_pi-pi_1.50_cpB.out	-246.723	-247.559	-247.589	-247.63		0.268592	1.73329	1.27014	1.46277		0.133705	1.20254	0.781486	0.915202		0.134887	0.530751	0.488652	0.547573	25_Pyridine-Pyridine_pi-pi_1.50_dimer.out	-0.270519	-0.287341	-0.27893	-0.301359		1.19418	0.781497	0.98784
25_Pyridine-Pyridine_pi-pi_2.00_dimer.out	-493.446	-495.117	-495.178	-495.261	25_Pyridine-Pyridine_pi-pi_1.00_monomerA.out	-246.723	-247.558	-247.589	-247.63	25_Pyridine-Pyridine_pi-pi_1.00_monomerB.out	-246.723	-247.558	-247.589	-247.63	25_Pyridine-Pyridine_pi-pi_2.00_cpA.out	-246.723	-247.558	-247.589	-247.63	25_Pyridine-Pyridine_pi-pi_2.00_cpB.out	-246.723	-247.558	-247.589	-247.63		0.128255	0.423772	0.329226	0.367837		0.102899	0.291629	0.21045	0.231948		0.0253561	0.132143	0.118776	0.135889	25_Pyridine-Pyridine_pi-pi_2.00_dimer.out	-0.0559348	-0.0596808	-0.0578078	-0.0620252		0.239582	0.129049	0.184315
26_Uracil-Uracil_pi-pi_0.90_dimer.out	-825.047	-827.569	-827.611	-827.726	26_Uracil-Uracil_pi-pi_1.00_monomerA.out	-412.528	-413.773	-413.798	-413.852	26_Uracil-Uracil_pi-pi_1.00_monomerB.out	-412.528	-413.773	-413.798	-413.852	26_Uracil-Uracil_pi-pi_0.90_cpA.out	-412.53	-413.779	-413.803	-413.859	26_Uracil-Uracil_pi-pi_0.90_cpB.out	-412.53	-413.779	-413.803	-413.859		-5.52159	14.967	10.0707	13.3369		-7.56211	7.30326	2.81172	5.19349		2.04051	7.66372	7.25897	8.14338	26_Uracil-Uracil_pi-pi_0.90_dimer.out	-1.6301	-2.10977	-1.86994	-2.40639		18.8585	12.7556	15.807
26_Uracil-Uracil_pi-pi_0.95_dimer.out	-825.054	-827.57	-827.614	-827.728	26_Uracil-Uracil_pi-pi_1.00_monomerA.out	-412.528	-413.773	-413.798	-413.852	26_Uracil-Uracil_pi-pi_1.00_monomerB.out	-412.528	-413.773	-413.798	-413.852	26_Uracil-Uracil_pi-pi_0.95_cpA.out	-412.529	-413.778	-413.802	-413.858	26_Uracil-Uracil_pi-pi_0.95_cpB.out	-412.529	-413.778	-413.802	-413.858		-1.06548	15.7095	11.7634	14.4861		-2.83306	9.21074	5.59632	7.56823		1.76759	6.49875	6.16707	6.91791	26_Uracil-Uracil_pi-pi_0.95_dimer.out	-1.22335	-1.64251	-1.43293	-1.89585		15.5516	10.4013	12.9765
26_Uracil-Uracil_pi-pi_1.00_dimer.out	-825.058	-827.569	-827.614	-827.728	26_Uracil-Uracil_pi-pi_1.00_monomerA.out	-412.528	-413.773	-413.798	-413.852	26_Uracil-Uracil_pi-pi_1.00_monomerB.out	-412.528	-413.773	-413.798	-413.852	26_Uracil-Uracil_pi-pi_1.00_cpA.out	-412.529	-413.777	-413.802	-413.857	26_Uracil-Uracil_pi-pi_1.00_cpB.out	-412.529	-413.777	-413.802	-413.857		1.43993	15.1896	11.9926	14.2628		-0.0660093	9.70174	6.77914	8.41269		1.50594	5.48782	5.21347	5.85012	26_Uracil-Uracil_pi-pi_1.00_dimer.out	-0.926747	-1.28905	-1.1079	-1.50325		12.8229	8.4787	10.6508
26_Uracil-Uracil_pi-pi_1.05_dimer.out	-825.06	-827.568	-827.613	-827.726	26_Uracil-Uracil_pi-pi_1.00_monomerA.out	-412.528	-413.773	-413.798	-413.852	26_Uracil-Uracil_pi-pi_1.00_monomerB.out	-412.528	-413.773	-413.798	-413.852	26_Uracil-Uracil_pi-pi_1.05_cpA.out	-412.529	-413.776	-413.801	-413.856	26_Uracil-Uracil_pi-pi_1.05_cpB.out	-412.529	-413.776	-413.801	-413.856		2.75419	14.0391	11.4355	13.3288		1.48817	9.41552	7.04163	8.39485		1.26602	4.62354	4.39384	4.93392	26_Uracil-Uracil_pi-pi_1.05_dimer.out	-0.710297	-1.02068	-0.865486	-1.19956		10.5746	6.90668	8.74063
26_Uracil-Uracil_pi-pi_1.10_dimer.out	-825.061	-827.565	-827.612	-827.724	26_Uracil-Uracil_pi-pi_1.00_monomerA.out	-412.528	-413.773	-413.798	-413.852	26_Uracil-Uracil_pi-pi_1.00_monomerB.out	-412.528	-413.773	-413.798	-413.852	26_Uracil-Uracil_pi-pi_1.10_cpA.out	-412.529	-413.776	-413.8	-413.856	26_Uracil-Uracil_pi-pi_1.10_cpB.out	-412.529	-413.776	-413.8	-413.856		3.35595	12.6404	10.5077	12.0886		2.297	8.73956	6.80155	7.92305		1.05895	3.90084	3.70618	4.16553	26_Uracil-Uracil_pi-pi_1.10_dimer.out	-0.551829	-0.816516	-0.684172	-0.964027		8.73263	5.62605	7.17934
26_Uracil-Uracil_pi-pi_1.25_dimer.out	-825.061	-827.559	-827.607	-827.718	26_Uracil-Uracil_pi-pi_1.00_monomerA.out	-412.528	-413.773	-413.798	-413.852	26_Uracil-Uracil_pi-pi_1.00_monomerB.out	-412.528	-413.773	-413.798	-413.852	26_Uracil-Uracil_pi-pi_1.25_cpA.out	-412.528	-413.774	-413.799	-413.855	26_Uracil-Uracil_pi-pi_1.25_cpB.out	-412.528	-413.774	-413.799	-413.855		3.34424	8.6226	7.41066	8.34353		2.70453	6.19892	5.11241	5.75456		0.63971	2.42368	2.29824	2.58897	26_Uracil-Uracil_pi-pi_1.25_dimer.out	-0.279069	-0.444356	-0.361713	-0.521499		4.99929	3.05003	4.02466
26_Uracil-Uracil_pi-pi_1.50_dimer.out	-825.059	-827.552	-827.601	-827.712	26_Uracil-Uracil_pi-pi_1.00_monomerA.out	-412.528	-413.773	-413.798	-413.852	26_Uracil-Uracil_pi-pi_1.00_monomerB.out	-412.528	-413.773	-413.798	-413.852	26_Uracil-Uracil_pi-pi_1.50_cpA.out	-412.528	-413.774	-413.798	-413.853	26_Uracil-Uracil_pi-pi_1.50_cpB.out	-412.528	-413.774	-413.798	-413.853		2.17427	4.42921	3.90344	4.31808		1.87029	3.19531	2.74	3.00662		0.303973	1.2339	1.16344	1.31146	26_Uracil-Uracil_pi-pi_1.50_dimer.out	-0.111134	-0.188692	-0.149913	-0.211825		2.14382	1.13633	1.64007
26_Uracil-Uracil_pi-pi_2.00_dimer.out	-825.057	-827.548	-827.597	-827.707	26_Uracil-Uracil_pi-pi_1.00_monomerA.out	-412.528	-413.773	-413.798	-413.852	26_Uracil-Uracil_pi-pi_1.00_monomerB.out	-412.528	-413.773	-413.798	-413.852	26_Uracil-Uracil_pi-pi_2.00_cpA.out	-412.528	-413.773	-413.798	-413.853	26_Uracil-Uracil_pi-pi_2.00_cpB.out	-412.528	-413.773	-413.798	-413.853		0.930299	1.51513	1.38241	1.49748		0.803908	1.0282	0.922762	0.983872		0.126391	0.486937	0.459652	0.513606	26_Uracil-Uracil_pi-pi_2.00_dimer.out	-0.0176544	-0.0443231	-0.0309888	-0.0459259		0.567179	0.179964	0.373571
27_Benzene-Pyridine_pi-pi_0.90_dimer.out	-477.431	-479.103	-479.161	-479.246	27_Benzene-Pyridine_pi-pi_1.00_monomerA.out	-230.727	-231.533	-231.57	-231.609	27_Benzene-Pyridine_pi-pi_1.00_monomerB.out	-246.723	-247.558	-247.589	-247.63	27_Benzene-Pyridine_pi-pi_0.90_cpA.out	-246.724	-247.562	-247.592	-247.634	27_Benzene-Pyridine_pi-pi_0.90_cpB.out	-230.728	-231.537	-231.574	-231.614		-11.557	7.86513	1.66892	4.19688		-13.0283	2.73388	-3.08653	-1.10138		1.47132	5.13124	4.75545	5.29826	27_Benzene-Pyridine_pi-pi_0.90_dimer.out	-3.66825	-3.83526	-3.75176	-4.22017		15.7539	11.9269	13.8404
27_Benzene-Pyridine_pi-pi_0.95_dimer.out	-477.439	-479.104	-479.164	-479.248	27_Benzene-Pyridine_pi-pi_1.00_monomerA.out	-230.727	-231.533	-231.57	-231.609	27_Benzene-Pyridine_pi-pi_1.00_monomerB.out	-246.723	-247.558	-247.589	-247.63	27_Benzene-Pyridine_pi-pi_0.95_cpA.out	-246.724	-247.561	-247.591	-247.633	27_Benzene-Pyridine_pi-pi_0.95_cpB.out	-230.728	-231.536	-231.573	-231.613		-6.61727	8.48691	3.69651	5.67785		-7.80428	4.42181	-0.0786357	1.47664		1.18701	4.0651	3.77514	4.20122	27_Benzene-Pyridine_pi-pi_0.95_dimer.out	-2.80905	-2.94517	-2.87711	-3.23561		12.2951	9.28091	10.788
[truncated: 318 more rows]

## Sheet: HLC S66x8 haVTZ
																																									0.148215	0.107066	0.123693
[truncated: 531 more rows]

[truncated: 1 more sheets: Table 6]
