# Supplementary material for: S66x8 noncovalent interactions revisited: new benchmark and performance of composite localized coupled-cluster methods
Source: Royal Society of Chemistry journal article supplement (doi:10.1039/d2cp03938a), 2022-01-01
Supplement: d2cp03938a1.zip [file PNO-LCCSD(T)-based methods.xlsx]

## Sheet: PNO-LCCSD_T Default
		Default
		Dimer						monomerA						monomerB						cpA						cpB
		haVTZ		haVQZ		haV5Z		haVTZ		haVQZ		haV5Z		haVTZ		haVQZ		haV5Z		haVTZ		haVQZ		haV5Z		haVTZ		haVQZ		haV5Z
REF	systems	HF	PNO-LCCSD(T)	HF	PNO-LCCSD(T)	HF	PNO-LCCSD(T)	HF	PNO-LCCSD(T)	HF	PNO-LCCSD(T)	HF	PNO-LCCSD(T)	HF	PNO-LCCSD(T)	HF	PNO-LCCSD(T)	HF	PNO-LCCSD(T)	HF	PNO-LCCSD(T)	HF	PNO-LCCSD(T)	HF	PNO-LCCSD(T)	HF	PNO-LCCSD(T)	HF	PNO-LCCSD(T)	HF	PNO-LCCSD(T)
4.66552	01_Water-Water_0.90_dimer.out	-152.125	-152.69	-152.136	-152.734	-152.139	-152.748	-76.0601	-76.3415	-76.0655	-76.3635	-76.0669	-76.3706	-76.0603	-76.3416	-76.0657	-76.3636	-76.0671	-76.3706	-76.0603	-76.3418	-76.0658	-76.3637	-76.0671	-76.3706	-76.0601	-76.3418	-76.0656	-76.3636	-76.0669	-76.3706		-9.11648e-05	-0.0441096	-0.0220014	-0.0220171
4.95383	01_Water-Water_0.95_dimer.out	-152.126	-152.691	-152.137	-152.735	-152.14	-152.749	-76.0601	-76.3415	-76.0655	-76.3635	-76.0669	-76.3706	-76.0603	-76.3416	-76.0657	-76.3636	-76.0671	-76.3706	-76.0603	-76.3418	-76.0658	-76.3637	-76.0671	-76.3706	-76.0601	-76.3417	-76.0656	-76.3636	-76.0669	-76.3706		-7.86737e-05	-0.0440971	-0.0220014	-0.0220171
4.94643	01_Water-Water_1.00_dimer.out	-152.126	-152.691	-152.137	-152.735	-152.14	-152.749	-76.0601	-76.3415	-76.0655	-76.3635	-76.0669	-76.3706	-76.0603	-76.3416	-76.0657	-76.3636	-76.0671	-76.3706	-76.0603	-76.3418	-76.0657	-76.3637	-76.0671	-76.3706	-76.0601	-76.3417	-76.0656	-76.3636	-76.0669	-76.3706		-3.89244e-05	-0.0440574	-0.0220014	-0.0220171
4.76207	01_Water-Water_1.05_dimer.out	-152.126	-152.691	-152.137	-152.735	-152.14	-152.749	-76.0601	-76.3415	-76.0655	-76.3635	-76.0669	-76.3706	-76.0603	-76.3416	-76.0657	-76.3636	-76.0671	-76.3706	-76.0603	-76.3417	-76.0657	-76.3636	-76.0671	-76.3706	-76.0601	-76.3417	-76.0656	-76.3636	-76.0669	-76.3706		-1.92733e-05	-0.0440377	-0.0220014	-0.0220171
4.47984	01_Water-Water_1.10_dimer.out	-152.126	-152.69	-152.137	-152.734	-152.14	-152.748	-76.0601	-76.3415	-76.0655	-76.3635	-76.0669	-76.3706	-76.0603	-76.3416	-76.0657	-76.3636	-76.0671	-76.3706	-76.0603	-76.3417	-76.0657	-76.3636	-76.0671	-76.3706	-76.0601	-76.3417	-76.0656	-76.3636	-76.0669	-76.3706		9.69096e-06	-0.0440087	-0.0220014	-0.0220171
3.4705	01_Water-Water_1.25_dimer.out	-152.125	-152.689	-152.136	-152.733	-152.139	-152.747	-76.0601	-76.3415	-76.0655	-76.3635	-76.0669	-76.3706	-76.0603	-76.3416	-76.0657	-76.3636	-76.0671	-76.3706	-76.0603	-76.3417	-76.0657	-76.3636	-76.0671	-76.3706	-76.0601	-76.3416	-76.0655	-76.3636	-76.0669	-76.3706		5.92393e-05	-0.0439592	-0.0220014	-0.0220171
2.11656	01_Water-Water_1.50_dimer.out	-152.124	-152.686	-152.134	-152.73	-152.137	-152.744	-76.0601	-76.3415	-76.0655	-76.3635	-76.0669	-76.3706	-76.0603	-76.3416	-76.0657	-76.3636	-76.0671	-76.3706	-76.0603	-76.3416	-76.0657	-76.3636	-76.0671	-76.3706	-76.0601	-76.3415	-76.0655	-76.3635	-76.0669	-76.3706		4.18133e-05	-0.0439766	-0.0220014	-0.0220171
0.874474	01_Water-Water_2.00_dimer.out	-152.122	-152.685	-152.133	-152.729	-152.135	-152.743	-76.0601	-76.3415	-76.0655	-76.3635	-76.0669	-76.3706	-76.0603	-76.3416	-76.0657	-76.3636	-76.0671	-76.3706	-76.0603	-76.3416	-76.0657	-76.3636	-76.0671	-76.3706	-76.0601	-76.3415	-76.0655	-76.3635	-76.0669	-76.3706		3.58667e-05	-0.0439826	-0.0220014	-0.0220171
5.29836	02_Water-MeOH_0.90_dimer.out	-191.156	-191.911	-191.169	-191.965	-191.173	-191.982	-76.06	-76.3415	-76.0655	-76.3635	-76.0668	-76.3706	-115.092	-115.561	-115.099	-115.593	-115.101	-115.603	-115.092	-115.561	-115.1	-115.593	-115.101	-115.603	-76.0601	-76.3418	-76.0655	-76.3636	-76.0668	-76.3706		-0.000102682	-0.0541195	-0.0219948	-0.032022
5.62873	02_Water-MeOH_0.95_dimer.out	-191.157	-191.911	-191.171	-191.966	-191.174	-191.983	-76.06	-76.3415	-76.0655	-76.3635	-76.0668	-76.3706	-115.092	-115.561	-115.099	-115.593	-115.101	-115.603	-115.092	-115.561	-115.099	-115.593	-115.101	-115.603	-76.0601	-76.3418	-76.0655	-76.3636	-76.0668	-76.3706		-7.24003e-05	-0.0540892	-0.0219948	-0.032022
5.62675	02_Water-MeOH_1.00_dimer.out	-191.158	-191.911	-191.171	-191.966	-191.174	-191.983	-76.06	-76.3415	-76.0655	-76.3635	-76.0668	-76.3706	-115.092	-115.561	-115.099	-115.593	-115.101	-115.603	-115.092	-115.561	-115.099	-115.593	-115.101	-115.603	-76.0601	-76.3417	-76.0655	-76.3636	-76.0668	-76.3706		-5.41385e-05	-0.0540709	-0.0219948	-0.032022
5.42332	02_Water-MeOH_1.05_dimer.out	-191.158	-191.911	-191.171	-191.965	-191.174	-191.982	-76.06	-76.3415	-76.0655	-76.3635	-76.0668	-76.3706	-115.092	-115.561	-115.099	-115.593	-115.101	-115.603	-115.092	-115.561	-115.099	-115.593	-115.101	-115.603	-76.0601	-76.3417	-76.0655	-76.3636	-76.0668	-76.3706		-6.11875e-05	-0.054078	-0.0219948	-0.032022
5.10642	02_Water-MeOH_1.10_dimer.out	-191.158	-191.911	-191.171	-191.965	-191.174	-191.982	-76.06	-76.3415	-76.0655	-76.3635	-76.0668	-76.3706	-115.092	-115.561	-115.099	-115.593	-115.101	-115.603	-115.092	-115.561	-115.099	-115.593	-115.101	-115.603	-76.0601	-76.3417	-76.0655	-76.3636	-76.0668	-76.3706		-4.25933e-05	-0.0540594	-0.0219948	-0.032022
3.95632	02_Water-MeOH_1.25_dimer.out	-191.157	-191.909	-191.17	-191.963	-191.173	-191.98	-76.06	-76.3415	-76.0655	-76.3635	-76.0668	-76.3706	-115.092	-115.561	-115.099	-115.593	-115.101	-115.603	-115.092	-115.561	-115.099	-115.593	-115.101	-115.603	-76.0601	-76.3416	-76.0655	-76.3636	-76.0668	-76.3706		7.58677e-06	-0.0540092	-0.0219948	-0.032022
2.39149	02_Water-MeOH_1.50_dimer.out	-191.155	-191.906	-191.168	-191.96	-191.172	-191.978	-76.06	-76.3415	-76.0655	-76.3635	-76.0668	-76.3706	-115.092	-115.561	-115.099	-115.593	-115.101	-115.603	-115.092	-115.561	-115.099	-115.593	-115.101	-115.603	-76.06	-76.3416	-76.0655	-76.3635	-76.0668	-76.3706		2.18086e-05	-0.053995	-0.0219948	-0.032022
0.954245	02_Water-MeOH_2.00_dimer.out	-191.153	-191.904	-191.166	-191.958	-191.17	-191.975	-76.06	-76.3415	-76.0655	-76.3635	-76.0668	-76.3706	-115.092	-115.561	-115.099	-115.593	-115.101	-115.603	-115.092	-115.561	-115.099	-115.593	-115.101	-115.603	-76.06	-76.3415	-76.0655	-76.3635	-76.0668	-76.3706		1.31261e-05	-0.0540037	-0.0219948	-0.032022
6.60638	03_Water-MeNH2_0.90_dimer.out	-171.321	-172.056	-171.332	-172.105	-171.335	-172.12	-76.0598	-76.3415	-76.0652	-76.3634	-76.0665	-76.3705	-95.2553	-95.7046	-95.2614	-95.7311	-95.2629	-95.7391	-95.2553	-95.7049	-95.2614	-95.7312	-95.2629	-95.7391	-76.0598	-76.3417	-76.0652	-76.3635	-76.0665	-76.3705		-0.000143313	-0.0486186	-0.0219708	-0.0265045
6.95721	03_Water-MeNH2_0.95_dimer.out	-171.322	-172.057	-171.334	-172.106	-171.336	-172.121	-76.0598	-76.3415	-76.0652	-76.3634	-76.0665	-76.3705	-95.2553	-95.7046	-95.2614	-95.7311	-95.2629	-95.7391	-95.2553	-95.7049	-95.2614	-95.7312	-95.2629	-95.7391	-76.0598	-76.3417	-76.0652	-76.3635	-76.0665	-76.3705		-0.000126386	-0.0486017	-0.0219708	-0.0265045
6.94056	03_Water-MeNH2_1.00_dimer.out	-171.323	-172.057	-171.334	-172.106	-171.337	-172.121	-76.0598	-76.3415	-76.0652	-76.3634	-76.0665	-76.3705	-95.2553	-95.7046	-95.2614	-95.7311	-95.2629	-95.7391	-95.2553	-95.7048	-95.2614	-95.7312	-95.2629	-95.7391	-76.0598	-76.3417	-76.0652	-76.3635	-76.0665	-76.3705		-9.73885e-05	-0.0485727	-0.0219708	-0.0265045
6.69539	03_Water-MeNH2_1.05_dimer.out	-171.323	-172.057	-171.334	-172.105	-171.337	-172.12	-76.0598	-76.3415	-76.0652	-76.3634	-76.0665	-76.3705	-95.2553	-95.7046	-95.2614	-95.7311	-95.2629	-95.7391	-95.2553	-95.7048	-95.2614	-95.7312	-95.2629	-95.7391	-76.0598	-76.3417	-76.0652	-76.3635	-76.0665	-76.3705		-7.11783e-05	-0.0485465	-0.0219708	-0.0265045
6.31753	03_Water-MeNH2_1.10_dimer.out	-171.323	-172.056	-171.334	-172.105	-171.337	-172.12	-76.0598	-76.3415	-76.0652	-76.3634	-76.0665	-76.3705	-95.2553	-95.7046	-95.2614	-95.7311	-95.2629	-95.7391	-95.2553	-95.7047	-95.2614	-95.7312	-95.2629	-95.7391	-76.0598	-76.3416	-76.0652	-76.3635	-76.0665	-76.3705		-5.94354e-05	-0.0485347	-0.0219708	-0.0265045
4.92823	03_Water-MeNH2_1.25_dimer.out	-171.321	-172.054	-171.333	-172.102	-171.336	-172.117	-76.0598	-76.3415	-76.0652	-76.3634	-76.0665	-76.3705	-95.2553	-95.7046	-95.2614	-95.7311	-95.2629	-95.7391	-95.2553	-95.7047	-95.2614	-95.7311	-95.2629	-95.7391	-76.0598	-76.3416	-76.0652	-76.3635	-76.0665	-76.3705		-3.31073e-05	-0.0485084	-0.0219708	-0.0265045
2.97972	03_Water-MeNH2_1.50_dimer.out	-171.319	-172.051	-171.331	-172.099	-171.334	-172.114	-76.0598	-76.3415	-76.0652	-76.3634	-76.0665	-76.3705	-95.2553	-95.7046	-95.2614	-95.7311	-95.2629	-95.7391	-95.2553	-95.7046	-95.2614	-95.7311	-95.2629	-95.7391	-76.0598	-76.3415	-76.0652	-76.3634	-76.0665	-76.3705		5.03119e-06	-0.0484703	-0.0219708	-0.0265045
1.14169	03_Water-MeNH2_2.00_dimer.out	-171.317	-172.048	-171.328	-172.096	-171.331	-172.111	-76.0598	-76.3415	-76.0652	-76.3634	-76.0665	-76.3705	-95.2553	-95.7046	-95.2614	-95.7311	-95.2629	-95.7391	-95.2553	-95.7046	-95.2614	-95.7311	-95.2629	-95.7391	-76.0598	-76.3415	-76.0652	-76.3634	-76.0665	-76.3705		1.04396e-05	-0.0484648	-0.0219708	-0.0265045
7.73932	04_Water-Peptide_0.90_dimer.out	-323.17	-324.493	-323.191	-324.582	-323.196	-324.61	-76.0598	-76.3415	-76.0653	-76.3635	-76.0666	-76.3705	-247.102	-248.14	-247.118	-248.206	-247.121	-248.227	-247.102	-248.14	-247.118	-248.207	-247.121	-248.227	-76.06	-76.3419	-76.0653	-76.3636	-76.0666	-76.3705		-0.000190788	-0.08864	-0.0219768	-0.0664725
8.13066	04_Water-Peptide_0.95_dimer.out	-323.171	-324.494	-323.192	-324.583	-323.197	-324.61	-76.0598	-76.3415	-76.0653	-76.3635	-76.0666	-76.3705	-247.102	-248.14	-247.118	-248.206	-247.121	-248.227	-247.102	-248.14	-247.118	-248.207	-247.121	-248.227	-76.0599	-76.3418	-76.0653	-76.3636	-76.0666	-76.3705		-0.00016909	-0.0886183	-0.0219768	-0.0664725
8.12775	04_Water-Peptide_1.00_dimer.out	-323.171	-324.494	-323.193	-324.583	-323.197	-324.61	-76.0598	-76.3415	-76.0653	-76.3635	-76.0666	-76.3705	-247.102	-248.14	-247.118	-248.206	-247.121	-248.227	-247.102	-248.14	-247.118	-248.206	-247.121	-248.227	-76.0599	-76.3418	-76.0653	-76.3636	-76.0666	-76.3705		-0.000146141	-0.0885954	-0.0219768	-0.0664725
7.87768	04_Water-Peptide_1.05_dimer.out	-323.172	-324.494	-323.193	-324.582	-323.198	-324.61	-76.0598	-76.3415	-76.0653	-76.3635	-76.0666	-76.3705	-247.102	-248.14	-247.118	-248.206	-247.121	-248.227	-247.102	-248.14	-247.118	-248.206	-247.121	-248.227	-76.0599	-76.3418	-76.0653	-76.3635	-76.0666	-76.3705		-0.000139863	-0.0885891	-0.0219768	-0.0664725
7.48215	04_Water-Peptide_1.10_dimer.out	-323.171	-324.493	-323.193	-324.582	-323.197	-324.609	-76.0598	-76.3415	-76.0653	-76.3635	-76.0666	-76.3705	-247.102	-248.14	-247.118	-248.206	-247.121	-248.227	-247.102	-248.14	-247.118	-248.206	-247.121	-248.227	-76.0599	-76.3417	-76.0653	-76.3635	-76.0666	-76.3705		-0.000114698	-0.0885639	-0.0219768	-0.0664725
5.99425	04_Water-Peptide_1.25_dimer.out	-323.17	-324.491	-323.191	-324.579	-323.196	-324.607	-76.0598	-76.3415	-76.0653	-76.3635	-76.0666	-76.3705	-247.102	-248.14	-247.118	-248.206	-247.121	-248.227	-247.102	-248.14	-247.118	-248.206	-247.121	-248.227	-76.0599	-76.3417	-76.0653	-76.3635	-76.0666	-76.3705		-4.70622e-05	-0.0884963	-0.0219768	-0.0664725
3.83009	04_Water-Peptide_1.50_dimer.out	-323.168	-324.487	-323.189	-324.576	-323.193	-324.603	-76.0598	-76.3415	-76.0653	-76.3635	-76.0666	-76.3705	-247.102	-248.14	-247.118	-248.206	-247.121	-248.227	-247.102	-248.14	-247.118	-248.206	-247.121	-248.227	-76.0599	-76.3416	-76.0653	-76.3635	-76.0666	-76.3705		-1.56715e-05	-0.0884649	-0.0219768	-0.0664725
1.43887	04_Water-Peptide_2.00_dimer.out	-323.164	-324.484	-323.185	-324.572	-323.19	-324.6	-76.0598	-76.3415	-76.0653	-76.3635	-76.0666	-76.3705	-247.102	-248.14	-247.118	-248.206	-247.121	-248.227	-247.102	-248.14	-247.118	-248.206	-247.121	-248.227	-76.0598	-76.3415	-76.0653	-76.3635	-76.0666	-76.3705		4.86782e-06	-0.0884444	-0.0219768	-0.0664725
5.38667	05_MeOH-MeOH_0.90_dimer.out	-230.187	-231.13	-230.203	-231.195	-230.206	-231.215	-115.092	-115.561	-115.099	-115.593	-115.101	-115.603	-115.092	-115.561	-115.099	-115.593	-115.101	-115.603	-115.092	-115.562	-115.1	-115.593	-115.101	-115.603	-115.092	-115.561	-115.099	-115.593	-115.101	-115.603		-5.95742e-05	-0.0641159	-0.0320326	-0.0320237
5.77098	05_MeOH-MeOH_0.95_dimer.out	-230.189	-231.131	-230.204	-231.195	-230.208	-231.215	-115.092	-115.561	-115.099	-115.593	-115.101	-115.603	-115.092	-115.561	-115.099	-115.593	-115.101	-115.603	-115.092	-115.561	-115.1	-115.593	-115.101	-115.603	-115.092	-115.561	-115.099	-115.593	-115.101	-115.603		-5.30606e-05	-0.0641094	-0.0320326	-0.0320237
5.8036	05_MeOH-MeOH_1.00_dimer.out	-230.189	-231.131	-230.205	-231.195	-230.208	-231.215	-115.092	-115.561	-115.099	-115.593	-115.101	-115.603	-115.092	-115.561	-115.099	-115.593	-115.101	-115.603	-115.092	-115.561	-115.1	-115.593	-115.101	-115.603	-115.092	-115.561	-115.099	-115.593	-115.101	-115.603		-4.68743e-05	-0.0641032	-0.0320326	-0.0320237
5.62	05_MeOH-MeOH_1.05_dimer.out	-230.19	-231.131	-230.205	-231.195	-230.209	-231.215	-115.092	-115.561	-115.099	-115.593	-115.101	-115.603	-115.092	-115.561	-115.099	-115.593	-115.101	-115.603	-115.092	-115.561	-115.1	-115.593	-115.101	-115.603	-115.092	-115.561	-115.099	-115.593	-115.101	-115.603		-3.08049e-05	-0.0640871	-0.0320326	-0.0320237
5.31207	05_MeOH-MeOH_1.10_dimer.out	-230.19	-231.13	-230.205	-231.194	-230.209	-231.215	-115.092	-115.561	-115.099	-115.593	-115.101	-115.603	-115.092	-115.561	-115.099	-115.593	-115.101	-115.603	-115.092	-115.561	-115.1	-115.593	-115.101	-115.603	-115.092	-115.561	-115.099	-115.593	-115.101	-115.603		-2.20477e-05	-0.0640784	-0.0320326	-0.0320237
4.15067	05_MeOH-MeOH_1.25_dimer.out	-230.189	-231.129	-230.204	-231.193	-230.208	-231.213	-115.092	-115.561	-115.099	-115.593	-115.101	-115.603	-115.092	-115.561	-115.099	-115.593	-115.101	-115.603	-115.092	-115.561	-115.1	-115.593	-115.101	-115.603	-115.092	-115.561	-115.099	-115.593	-115.101	-115.603		9.21036e-06	-0.0640471	-0.0320326	-0.0320237
2.5284	05_MeOH-MeOH_1.50_dimer.out	-230.187	-231.126	-230.202	-231.19	-230.206	-231.21	-115.092	-115.561	-115.099	-115.593	-115.101	-115.603	-115.092	-115.561	-115.099	-115.593	-115.101	-115.603	-115.092	-115.561	-115.1	-115.593	-115.101	-115.603	-115.092	-115.561	-115.099	-115.593	-115.101	-115.603		1.51182e-05	-0.0640412	-0.0320326	-0.0320237
1.01101	05_MeOH-MeOH_2.00_dimer.out	-230.185	-231.124	-230.2	-231.188	-230.204	-231.208	-115.092	-115.561	-115.099	-115.593	-115.101	-115.603	-115.092	-115.561	-115.099	-115.593	-115.101	-115.603	-115.092	-115.561	-115.1	-115.593	-115.101	-115.603	-115.092	-115.561	-115.099	-115.593	-115.101	-115.603		1.3482e-05	-0.0640428	-0.0320326	-0.0320237
7.08127	06_MeOH-MeNH2_0.90_dimer.out	-210.351	-211.276	-210.365	-211.335	-210.368	-211.353	-115.091	-115.561	-115.099	-115.593	-115.101	-115.603	-95.2553	-95.7046	-95.2614	-95.7311	-95.2629	-95.7391	-95.2553	-95.705	-95.2614	-95.7313	-95.2629	-95.7391	-115.091	-115.561	-115.099	-115.593	-115.101	-115.603		-0.000159903	-0.0586754	-0.0320142	-0.0265014
7.55441	06_MeOH-MeNH2_0.95_dimer.out	-210.353	-211.277	-210.366	-211.336	-210.37	-211.354	-115.091	-115.561	-115.099	-115.593	-115.101	-115.603	-95.2553	-95.7046	-95.2614	-95.7311	-95.2629	-95.7391	-95.2553	-95.7049	-95.2614	-95.7312	-95.2629	-95.7391	-115.091	-115.561	-115.099	-115.593	-115.101	-115.603		-0.000118804	-0.0586343	-0.0320142	-0.0265014
7.60087	06_MeOH-MeNH2_1.00_dimer.out	-210.353	-211.277	-210.367	-211.336	-210.371	-211.354	-115.091	-115.561	-115.099	-115.593	-115.101	-115.603	-95.2553	-95.7046	-95.2614	-95.7311	-95.2629	-95.7391	-95.2553	-95.7049	-95.2614	-95.7312	-95.2629	-95.7391	-115.091	-115.561	-115.099	-115.593	-115.101	-115.603		-9.38351e-05	-0.0586094	-0.0320142	-0.0265014
7.37783	06_MeOH-MeNH2_1.05_dimer.out	-210.354	-211.277	-210.368	-211.335	-210.371	-211.354	-115.091	-115.561	-115.099	-115.593	-115.101	-115.603	-95.2553	-95.7046	-95.2614	-95.7311	-95.2629	-95.7391	-95.2553	-95.7048	-95.2614	-95.7312	-95.2629	-95.7391	-115.091	-115.561	-115.099	-115.593	-115.101	-115.603		-9.24924e-05	-0.058608	-0.0320142	-0.0265014
6.99427	06_MeOH-MeNH2_1.10_dimer.out	-210.354	-211.276	-210.368	-211.335	-210.371	-211.353	-115.091	-115.561	-115.099	-115.593	-115.101	-115.603	-95.2553	-95.7046	-95.2614	-95.7311	-95.2629	-95.7391	-95.2553	-95.7048	-95.2614	-95.7312	-95.2629	-95.7391	-115.091	-115.561	-115.099	-115.593	-115.101	-115.603		-7.23389e-05	-0.0585879	-0.0320142	-0.0265014
5.50482	06_MeOH-MeNH2_1.25_dimer.out	-210.353	-211.274	-210.367	-211.333	-210.37	-211.351	-115.091	-115.561	-115.099	-115.593	-115.101	-115.603	-95.2553	-95.7046	-95.2614	-95.7311	-95.2629	-95.7391	-95.2553	-95.7047	-95.2614	-95.7312	-95.2629	-95.7391	-115.091	-115.561	-115.099	-115.593	-115.101	-115.603		-2.33475e-05	-0.0585389	-0.0320142	-0.0265014
3.34489	06_MeOH-MeNH2_1.50_dimer.out	-210.351	-211.271	-210.365	-211.329	-210.368	-211.347	-115.091	-115.561	-115.099	-115.593	-115.101	-115.603	-95.2553	-95.7046	-95.2614	-95.7311	-95.2629	-95.7391	-95.2553	-95.7047	-95.2614	-95.7311	-95.2629	-95.7391	-115.091	-115.561	-115.099	-115.593	-115.101	-115.603		1.01745e-05	-0.0585054	-0.0320142	-0.0265014
1.27327	06_MeOH-MeNH2_2.00_dimer.out	-210.348	-211.267	-210.362	-211.326	-210.365	-211.344	-115.091	-115.561	-115.099	-115.593	-115.101	-115.603	-95.2553	-95.7046	-95.2614	-95.7311	-95.2629	-95.7391	-95.2553	-95.7046	-95.2614	-95.7311	-95.2629	-95.7391	-115.091	-115.561	-115.099	-115.593	-115.101	-115.603		1.25648e-05	-0.058503	-0.0320142	-0.0265014
7.75614	07_MeOH-Peptide_0.90_dimer.out	-362.2	-363.713	-362.223	-363.811	-362.229	-363.842	-115.091	-115.561	-115.099	-115.593	-115.101	-115.603	-247.102	-248.14	-247.118	-248.206	-247.122	-248.227	-247.103	-248.14	-247.118	-248.207	-247.122	-248.227	-115.091	-115.561	-115.099	-115.593	-115.101	-115.603		-0.000150499	-0.0986183	-0.0320203	-0.0664475
8.23517	07_MeOH-Peptide_0.95_dimer.out	-362.202	-363.714	-362.225	-363.812	-362.23	-363.843	-115.091	-115.561	-115.099	-115.593	-115.101	-115.603	-247.102	-248.14	-247.118	-248.206	-247.122	-248.227	-247.103	-248.14	-247.118	-248.207	-247.122	-248.227	-115.091	-115.561	-115.099	-115.593	-115.101	-115.603		-0.000132119	-0.0985999	-0.0320203	-0.0664475
8.28898	07_MeOH-Peptide_1.00_dimer.out	-362.202	-363.714	-362.226	-363.812	-362.231	-363.843	-115.091	-115.561	-115.099	-115.593	-115.101	-115.603	-247.102	-248.14	-247.118	-248.206	-247.122	-248.227	-247.103	-248.14	-247.118	-248.207	-247.122	-248.227	-115.091	-115.561	-115.099	-115.593	-115.101	-115.603		-0.000114529	-0.0985823	-0.0320203	-0.0664475
8.07188	07_MeOH-Peptide_1.05_dimer.out	-362.203	-363.713	-362.226	-363.812	-362.231	-363.843	-115.091	-115.561	-115.099	-115.593	-115.101	-115.603	-247.102	-248.14	-247.118	-248.206	-247.122	-248.227	-247.103	-248.14	-247.118	-248.207	-247.122	-248.227	-115.091	-115.561	-115.099	-115.593	-115.101	-115.603		-0.000120059	-0.0985878	-0.0320203	-0.0664475
7.69153	07_MeOH-Peptide_1.10_dimer.out	-362.203	-363.713	-362.226	-363.811	-362.231	-363.842	-115.091	-115.561	-115.099	-115.593	-115.101	-115.603	-247.102	-248.14	-247.118	-248.206	-247.122	-248.227	-247.103	-248.14	-247.118	-248.206	-247.122	-248.227	-115.091	-115.561	-115.099	-115.593	-115.101	-115.603		-9.30497e-05	-0.0985608	-0.0320203	-0.0664475
6.18753	07_MeOH-Peptide_1.25_dimer.out	-362.201	-363.711	-362.225	-363.809	-362.23	-363.84	-115.091	-115.561	-115.099	-115.593	-115.101	-115.603	-247.102	-248.14	-247.118	-248.206	-247.122	-248.227	-247.103	-248.14	-247.118	-248.206	-247.122	-248.227	-115.091	-115.561	-115.099	-115.593	-115.101	-115.603		-2.13854e-05	-0.0984892	-0.0320203	-0.0664475
3.64659	07_MeOH-Peptide_1.50_dimer.out	-362.199	-363.707	-362.222	-363.805	-362.227	-363.836	-115.091	-115.561	-115.099	-115.593	-115.101	-115.603	-247.102	-248.14	-247.118	-248.206	-247.122	-248.227	-247.103	-248.14	-247.118	-248.206	-247.122	-248.227	-115.091	-115.561	-115.099	-115.593	-115.101	-115.603		-8.03984e-06	-0.0984758	-0.0320203	-0.0664475
1.09751	07_MeOH-Peptide_2.00_dimer.out	-362.195	-363.703	-362.219	-363.801	-362.224	-363.831	-115.091	-115.561	-115.099	-115.593	-115.101	-115.603	-247.102	-248.14	-247.118	-248.206	-247.122	-248.227	-247.102	-248.14	-247.118	-248.206	-247.122	-248.227	-115.091	-115.561	-115.099	-115.593	-115.101	-115.603		3.63345e-07	-0.0984674	-0.0320203	-0.0664475
4.67513	08_MeOH-Water_0.90_dimer.out	-191.156	-191.91	-191.169	-191.964	-191.172	-191.981	-115.092	-115.561	-115.099	-115.593	-115.101	-115.603	-76.0603	-76.3416	-76.0657	-76.3636	-76.0671	-76.3706	-76.0604	-76.3419	-76.0658	-76.3637	-76.0671	-76.3706	-115.092	-115.561	-115.099	-115.593	-115.101	-115.603		-6.9263e-05	-0.0541247	-0.0320382	-0.0220172
5.01703	08_MeOH-Water_0.95_dimer.out	-191.157	-191.91	-191.17	-191.964	-191.174	-191.982	-115.092	-115.561	-115.099	-115.593	-115.101	-115.603	-76.0603	-76.3416	-76.0657	-76.3636	-76.0671	-76.3706	-76.0604	-76.3418	-76.0658	-76.3637	-76.0671	-76.3706	-115.092	-115.561	-115.099	-115.593	-115.101	-115.603		-2.41539e-05	-0.0540796	-0.0320382	-0.0220172
5.04458	08_MeOH-Water_1.00_dimer.out	-191.158	-191.91	-191.171	-191.965	-191.174	-191.982	-115.092	-115.561	-115.099	-115.593	-115.101	-115.603	-76.0603	-76.3416	-76.0657	-76.3636	-76.0671	-76.3706	-76.0604	-76.3418	-76.0658	-76.3637	-76.0671	-76.3706	-115.092	-115.561	-115.099	-115.593	-115.101	-115.603		2.75531e-06	-0.0540527	-0.0320382	-0.0220172
4.88113	08_MeOH-Water_1.05_dimer.out	-191.158	-191.91	-191.171	-191.964	-191.174	-191.981	-115.092	-115.561	-115.099	-115.593	-115.101	-115.603	-76.0603	-76.3416	-76.0657	-76.3636	-76.0671	-76.3706	-76.0604	-76.3418	-76.0658	-76.3636	-76.0671	-76.3706	-115.092	-115.561	-115.099	-115.593	-115.101	-115.603		-6.92995e-06	-0.0540624	-0.0320382	-0.0220172
4.60958	08_MeOH-Water_1.10_dimer.out	-191.158	-191.91	-191.171	-191.964	-191.174	-191.981	-115.092	-115.561	-115.099	-115.593	-115.101	-115.603	-76.0603	-76.3416	-76.0657	-76.3636	-76.0671	-76.3706	-76.0603	-76.3417	-76.0658	-76.3636	-76.0671	-76.3706	-115.092	-115.561	-115.099	-115.593	-115.101	-115.603		8.10201e-06	-0.0540474	-0.0320382	-0.0220172
3.59767	08_MeOH-Water_1.25_dimer.out	-191.157	-191.908	-191.17	-191.962	-191.173	-191.979	-115.092	-115.561	-115.099	-115.593	-115.101	-115.603	-76.0603	-76.3416	-76.0657	-76.3636	-76.0671	-76.3706	-76.0603	-76.3417	-76.0658	-76.3636	-76.0671	-76.3706	-115.092	-115.561	-115.099	-115.593	-115.101	-115.603		5.06135e-05	-0.0540048	-0.0320382	-0.0220172
2.20477	08_MeOH-Water_1.50_dimer.out	-191.155	-191.906	-191.168	-191.96	-191.172	-191.977	-115.092	-115.561	-115.099	-115.593	-115.101	-115.603	-76.0603	-76.3416	-76.0657	-76.3636	-76.0671	-76.3706	-76.0603	-76.3416	-76.0657	-76.3636	-76.0671	-76.3706	-115.092	-115.561	-115.099	-115.593	-115.101	-115.603		4.60381e-05	-0.0540094	-0.0320382	-0.0220172
0.909327	08_MeOH-Water_2.00_dimer.out	-191.153	-191.904	-191.167	-191.958	-191.17	-191.975	-115.092	-115.561	-115.099	-115.593	-115.101	-115.603	-76.0603	-76.3416	-76.0657	-76.3636	-76.0671	-76.3706	-76.0603	-76.3416	-76.0657	-76.3636	-76.0671	-76.3706	-115.092	-115.561	-115.099	-115.593	-115.101	-115.603		4.24626e-05	-0.054013	-0.0320382	-0.0220172
2.83742	09_MeNH2-MeOH_0.90_dimer.out	-210.347	-211.27	-210.361	-211.329	-210.364	-211.347	-95.2552	-95.7046	-95.2613	-95.7311	-95.2628	-95.739	-115.092	-115.561	-115.1	-115.593	-115.101	-115.603	-115.092	-115.561	-115.1	-115.593	-115.101	-115.603	-95.2552	-95.7047	-95.2613	-95.7311	-95.2628	-95.739		-9.67487e-05	-0.0586399	-0.0265087	-0.0320344
3.05113	09_MeNH2-MeOH_0.95_dimer.out	-210.348	-211.27	-210.362	-211.329	-210.365	-211.347	-95.2552	-95.7046	-95.2613	-95.7311	-95.2628	-95.739	-115.092	-115.561	-115.1	-115.593	-115.101	-115.603	-115.092	-115.561	-115.1	-115.593	-115.101	-115.603	-95.2552	-95.7047	-95.2613	-95.7311	-95.2628	-95.739		-5.54611e-05	-0.0585986	-0.0265087	-0.0320344
3.03663	09_MeNH2-MeOH_1.00_dimer.out	-210.349	-211.27	-210.363	-211.329	-210.366	-211.347	-95.2552	-95.7046	-95.2613	-95.7311	-95.2628	-95.739	-115.092	-115.561	-115.1	-115.593	-115.101	-115.603	-115.092	-115.561	-115.1	-115.593	-115.101	-115.603	-95.2552	-95.7046	-95.2613	-95.7311	-95.2628	-95.739		-2.27416e-05	-0.0585659	-0.0265087	-0.0320344
2.89242	09_MeNH2-MeOH_1.05_dimer.out	-210.349	-211.27	-210.363	-211.329	-210.366	-211.347	-95.2552	-95.7046	-95.2613	-95.7311	-95.2628	-95.739	-115.092	-115.561	-115.1	-115.593	-115.101	-115.603	-115.092	-115.561	-115.1	-115.593	-115.101	-115.603	-95.2552	-95.7046	-95.2613	-95.7311	-95.2628	-95.739		-1.51792e-05	-0.0585583	-0.0265087	-0.0320344
2.6818	09_MeNH2-MeOH_1.10_dimer.out	-210.349	-211.27	-210.363	-211.328	-210.366	-211.346	-95.2552	-95.7046	-95.2613	-95.7311	-95.2628	-95.739	-115.092	-115.561	-115.1	-115.593	-115.101	-115.603	-115.092	-115.561	-115.1	-115.593	-115.101	-115.603	-95.2552	-95.7046	-95.2613	-95.7311	-95.2628	-95.739		-6.12888e-06	-0.0585493	-0.0265087	-0.0320344
1.97082	09_MeNH2-MeOH_1.25_dimer.out	-210.349	-211.269	-210.363	-211.327	-210.366	-211.345	-95.2552	-95.7046	-95.2613	-95.7311	-95.2628	-95.739	-115.092	-115.561	-115.1	-115.593	-115.101	-115.603	-115.092	-115.561	-115.1	-115.593	-115.101	-115.603	-95.2552	-95.7046	-95.2613	-95.7311	-95.2628	-95.739		-2.69959e-06	-0.0585458	-0.0265087	-0.0320344
1.09813	09_MeNH2-MeOH_1.50_dimer.out	-210.348	-211.267	-210.362	-211.326	-210.365	-211.344	-95.2552	-95.7046	-95.2613	-95.7311	-95.2628	-95.739	-115.092	-115.561	-115.1	-115.593	-115.101	-115.603	-115.092	-115.561	-115.1	-115.593	-115.101	-115.603	-95.2552	-95.7046	-95.2613	-95.7311	-95.2628	-95.739		1.7936e-05	-0.0585252	-0.0265087	-0.0320344
0.393125	09_MeNH2-MeOH_2.00_dimer.out	-210.348	-211.266	-210.361	-211.325	-210.365	-211.343	-95.2552	-95.7046	-95.2613	-95.7311	-95.2628	-95.739	-115.092	-115.561	-115.1	-115.593	-115.101	-115.603	-115.092	-115.561	-115.1	-115.593	-115.101	-115.603	-95.2552	-95.7046	-95.2613	-95.7311	-95.2628	-95.739		9.97595e-06	-0.0585332	-0.0265087	-0.0320344
3.72176	10_MeNH2-MeNH2_0.90_dimer.out	-190.509	-191.415	-190.521	-191.468	-190.524	-191.484	-95.2551	-95.7046	-95.2613	-95.7311	-95.2627	-95.739	-95.2552	-95.7046	-95.2613	-95.7311	-95.2628	-95.7391	-95.2553	-95.7049	-95.2614	-95.7312	-95.2628	-95.7391	-95.2552	-95.7048	-95.2613	-95.7311	-95.2627	-95.739		-0.000185553	-0.0531915	-0.0265021	-0.0265038
4.10425	10_MeNH2-MeNH2_0.95_dimer.out	-190.511	-191.415	-190.523	-191.469	-190.526	-191.485	-95.2551	-95.7046	-95.2613	-95.7311	-95.2627	-95.739	-95.2552	-95.7046	-95.2613	-95.7311	-95.2628	-95.7391	-95.2553	-95.7048	-95.2614	-95.7312	-95.2628	-95.7391	-95.2552	-95.7047	-95.2613	-95.7311	-95.2627	-95.739		-0.000183511	-0.0531894	-0.0265021	-0.0265038
4.1526	10_MeNH2-MeNH2_1.00_dimer.out	-190.512	-191.416	-190.524	-191.469	-190.527	-191.485	-95.2551	-95.7046	-95.2613	-95.7311	-95.2627	-95.739	-95.2552	-95.7046	-95.2613	-95.7311	-95.2628	-95.7391	-95.2553	-95.7047	-95.2614	-95.7311	-95.2628	-95.7391	-95.2552	-95.7047	-95.2613	-95.7311	-95.2627	-95.739		-0.000149367	-0.0531553	-0.0265021	-0.0265038
4.00192	10_MeNH2-MeNH2_1.05_dimer.out	-190.513	-191.415	-190.525	-191.468	-190.528	-191.484	-95.2551	-95.7046	-95.2613	-95.7311	-95.2627	-95.739	-95.2552	-95.7046	-95.2613	-95.7311	-95.2628	-95.7391	-95.2553	-95.7047	-95.2614	-95.7311	-95.2628	-95.7391	-95.2552	-95.7047	-95.2613	-95.7311	-95.2627	-95.739		-0.000136691	-0.0531426	-0.0265021	-0.0265038
3.74167	10_MeNH2-MeNH2_1.10_dimer.out	-190.513	-191.415	-190.525	-191.468	-190.528	-191.484	-95.2551	-95.7046	-95.2613	-95.7311	-95.2627	-95.739	-95.2552	-95.7046	-95.2613	-95.7311	-95.2628	-95.7391	-95.2552	-95.7047	-95.2614	-95.7311	-95.2628	-95.7391	-95.2552	-95.7046	-95.2613	-95.7311	-95.2627	-95.739		-0.000104025	-0.0531099	-0.0265021	-0.0265038
2.78069	10_MeNH2-MeNH2_1.25_dimer.out	-190.513	-191.413	-190.525	-191.467	-190.528	-191.482	-95.2551	-95.7046	-95.2613	-95.7311	-95.2627	-95.739	-95.2552	-95.7046	-95.2613	-95.7311	-95.2628	-95.7391	-95.2552	-95.7047	-95.2614	-95.7311	-95.2628	-95.7391	-95.2551	-95.7046	-95.2613	-95.7311	-95.2627	-95.739		-5.07478e-05	-0.0530567	-0.0265021	-0.0265038
1.30176	10_MeNH2-MeNH2_1.50_dimer.out	-190.512	-191.411	-190.524	-191.464	-190.527	-191.48	-95.2551	-95.7046	-95.2613	-95.7311	-95.2627	-95.739	-95.2552	-95.7046	-95.2613	-95.7311	-95.2628	-95.7391	-95.2552	-95.7046	-95.2614	-95.7311	-95.2628	-95.7391	-95.2551	-95.7046	-95.2613	-95.7311	-95.2627	-95.739		5.06187e-06	-0.0530008	-0.0265021	-0.0265038
0.385362	10_MeNH2-MeNH2_2.00_dimer.out	-190.511	-191.41	-190.523	-191.463	-190.526	-191.479	-95.2551	-95.7046	-95.2613	-95.7311	-95.2627	-95.739	-95.2552	-95.7046	-95.2613	-95.7311	-95.2628	-95.7391	-95.2552	-95.7046	-95.2613	-95.7311	-95.2628	-95.7391	-95.2551	-95.7046	-95.2613	-95.7311	-95.2627	-95.739		5.34452e-06	-0.0530006	-0.0265021	-0.0265038
4.95826	11_MeNH2-Peptide_0.90_dimer.out	-342.358	-343.852	-342.379	-343.945	-342.384	-343.974	-95.2551	-95.7045	-95.2612	-95.731	-95.2627	-95.739	-247.103	-248.14	-247.118	-248.207	-247.122	-248.227	-247.103	-248.14	-247.118	-248.207	-247.122	-248.227	-95.2552	-95.7048	-95.2613	-95.7311	-95.2627	-95.739		-0.000172979	-0.0931317	-0.026502	-0.0664567
5.35424	11_MeNH2-Peptide_0.95_dimer.out	-342.359	-343.853	-342.381	-343.946	-342.386	-343.974	-95.2551	-95.7045	-95.2612	-95.731	-95.2627	-95.739	-247.103	-248.14	-247.118	-248.207	-247.122	-248.227	-247.103	-248.14	-247.118	-248.207	-247.122	-248.227	-95.2552	-95.7047	-95.2613	-95.7311	-95.2627	-95.739		-0.000145796	-0.0931045	-0.026502	-0.0664567
5.39666	11_MeNH2-Peptide_1.00_dimer.out	-342.361	-343.853	-342.382	-343.946	-342.387	-343.975	-95.2551	-95.7045	-95.2612	-95.731	-95.2627	-95.739	-247.103	-248.14	-247.118	-248.207	-247.122	-248.227	-247.103	-248.14	-247.118	-248.207	-247.122	-248.227	-95.2552	-95.7047	-95.2613	-95.7311	-95.2627	-95.739		-9.90278e-05	-0.0930577	-0.026502	-0.0664567
5.22226	11_MeNH2-Peptide_1.05_dimer.out	-342.361	-343.853	-342.383	-343.946	-342.388	-343.974	-95.2551	-95.7045	-95.2612	-95.731	-95.2627	-95.739	-247.103	-248.14	-247.118	-248.207	-247.122	-248.227	-247.103	-248.14	-247.118	-248.207	-247.122	-248.227	-95.2552	-95.7047	-95.2613	-95.7311	-95.2627	-95.739		-7.62677e-05	-0.093035	-0.026502	-0.0664567
4.92339	11_MeNH2-Peptide_1.10_dimer.out	-342.361	-343.852	-342.383	-343.945	-342.388	-343.974	-95.2551	-95.7045	-95.2612	-95.731	-95.2627	-95.739	-247.103	-248.14	-247.118	-248.207	-247.122	-248.227	-247.103	-248.14	-247.118	-248.207	-247.122	-248.227	-95.2551	-95.7046	-95.2613	-95.7311	-95.2627	-95.739		-4.63079e-05	-0.093005	-0.026502	-0.0664567
3.19683	11_MeNH2-Peptide_1.25_dimer.out	-342.361	-343.85	-342.383	-343.943	-342.388	-343.971	-95.2551	-95.7045	-95.2612	-95.731	-95.2627	-95.739	-247.103	-248.14	-247.118	-248.207	-247.122	-248.227	-247.103	-248.14	-247.118	-248.207	-247.122	-248.227	-95.2551	-95.7046	-95.2613	-95.731	-95.2627	-95.739		-8.91827e-06	-0.0929676	-0.026502	-0.0664567
1.39662	11_MeNH2-Peptide_1.50_dimer.out	-342.359	-343.847	-342.381	-343.94	-342.386	-343.968	-95.2551	-95.7045	-95.2612	-95.731	-95.2627	-95.739	-247.103	-248.14	-247.118	-248.207	-247.122	-248.227	-247.103	-248.14	-247.118	-248.207	-247.122	-248.227	-95.2551	-95.7046	-95.2612	-95.731	-95.2627	-95.739		8.81946e-06	-0.0929499	-0.026502	-0.0664567
0.454835	11_MeNH2-Peptide_2.00_dimer.out	-342.358	-343.845	-342.38	-343.938	-342.385	-343.967	-95.2551	-95.7045	-95.2612	-95.731	-95.2627	-95.739	-247.103	-248.14	-247.118	-248.207	-247.122	-248.227	-247.103	-248.14	-247.118	-248.207	-247.122	-248.227	-95.2551	-95.7045	-95.2612	-95.731	-95.2627	-95.739		5.68054e-06	-0.092953	-0.026502	-0.0664567
6.86088	12_MeNH2-Water_0.90_dimer.out	-171.32	-172.057	-171.332	-172.105	-171.334	-172.12	-95.2552	-95.7046	-95.2614	-95.7311	-95.2628	-95.7391	-76.0597	-76.3414	-76.0652	-76.3634	-76.0665	-76.3704	-76.0598	-76.3418	-76.0652	-76.3635	-76.0665	-76.3705	-95.2553	-95.705	-95.2614	-95.7312	-95.2629	-95.7391		-0.000124703	-0.0485947	-0.0265016	-0.0219685
7.29079	12_MeNH2-Water_0.95_dimer.out	-171.322	-172.057	-171.333	-172.106	-171.336	-172.121	-95.2552	-95.7046	-95.2614	-95.7311	-95.2628	-95.7391	-76.0597	-76.3414	-76.0652	-76.3634	-76.0665	-76.3704	-76.0598	-76.3418	-76.0652	-76.3635	-76.0665	-76.3705	-95.2553	-95.7049	-95.2614	-95.7312	-95.2629	-95.7391		-9.20863e-05	-0.0485621	-0.0265016	-0.0219685
7.3118	12_MeNH2-Water_1.00_dimer.out	-171.323	-172.058	-171.334	-172.106	-171.337	-172.121	-95.2552	-95.7046	-95.2614	-95.7311	-95.2628	-95.7391	-76.0597	-76.3414	-76.0652	-76.3634	-76.0665	-76.3704	-76.0598	-76.3417	-76.0652	-76.3635	-76.0665	-76.3705	-95.2553	-95.7049	-95.2614	-95.7312	-95.2629	-95.7391		-9.03087e-05	-0.0485603	-0.0265016	-0.0219685
7.07662	12_MeNH2-Water_1.05_dimer.out	-171.323	-172.057	-171.334	-172.106	-171.337	-172.121	-95.2552	-95.7046	-95.2614	-95.7311	-95.2628	-95.7391	-76.0597	-76.3414	-76.0652	-76.3634	-76.0665	-76.3704	-76.0598	-76.3417	-76.0652	-76.3635	-76.0665	-76.3705	-95.2553	-95.7048	-95.2614	-95.7312	-95.2629	-95.7391		-9.01786e-05	-0.0485602	-0.0265016	-0.0219685
6.69088	12_MeNH2-Water_1.10_dimer.out	-171.323	-172.057	-171.334	-172.105	-171.337	-172.12	-95.2552	-95.7046	-95.2614	-95.7311	-95.2628	-95.7391	-76.0597	-76.3414	-76.0652	-76.3634	-76.0665	-76.3704	-76.0598	-76.3416	-76.0652	-76.3635	-76.0665	-76.3705	-95.2553	-95.7048	-95.2614	-95.7312	-95.2629	-95.7391		-7.95485e-05	-0.0485496	-0.0265016	-0.0219685
5.23057	12_MeNH2-Water_1.25_dimer.out	-171.322	-172.054	-171.333	-172.103	-171.336	-172.118	-95.2552	-95.7046	-95.2614	-95.7311	-95.2628	-95.7391	-76.0597	-76.3414	-76.0652	-76.3634	-76.0665	-76.3704	-76.0598	-76.3416	-76.0652	-76.3635	-76.0665	-76.3705	-95.2553	-95.7047	-95.2614	-95.7311	-95.2628	-95.7391		-6.91175e-05	-0.0485391	-0.0265016	-0.0219685
3.15494	12_MeNH2-Water_1.50_dimer.out	-171.319	-172.051	-171.331	-172.1	-171.334	-172.115	-95.2552	-95.7046	-95.2614	-95.7311	-95.2628	-95.7391	-76.0597	-76.3414	-76.0652	-76.3634	-76.0665	-76.3704	-76.0598	-76.3415	-76.0652	-76.3634	-76.0665	-76.3704	-95.2553	-95.7046	-95.2614	-95.7311	-95.2628	-95.7391		-8.10198e-06	-0.0484781	-0.0265016	-0.0219685
1.19627	12_MeNH2-Water_2.00_dimer.out	-171.317	-172.048	-171.328	-172.096	-171.331	-172.111	-95.2552	-95.7046	-95.2614	-95.7311	-95.2628	-95.7391	-76.0597	-76.3414	-76.0652	-76.3634	-76.0665	-76.3704	-76.0597	-76.3415	-76.0652	-76.3634	-76.0665	-76.3704	-95.2553	-95.7046	-95.2614	-95.7311	-95.2628	-95.7391		5.40899e-06	-0.0484646	-0.0265016	-0.0219685
5.75338	13_Peptide-MeOH_0.90_dimer.out	-362.197	-363.71	-362.221	-363.809	-362.226	-363.839	-247.103	-248.14	-247.118	-248.207	-247.122	-248.227	-115.092	-115.561	-115.1	-115.593	-115.101	-115.603	-115.092	-115.561	-115.1	-115.593	-115.101	-115.603	-247.103	-248.14	-247.118	-248.207	-247.122	-248.227		-0.000104407	-0.0986137	-0.0664824	-0.032027
6.16512	13_Peptide-MeOH_0.95_dimer.out	-362.199	-363.711	-362.222	-363.809	-362.228	-363.84	-247.103	-248.14	-247.118	-248.207	-247.122	-248.227	-115.092	-115.561	-115.1	-115.593	-115.101	-115.603	-115.092	-115.561	-115.1	-115.593	-115.101	-115.603	-247.103	-248.14	-247.118	-248.207	-247.122	-248.227		-8.15189e-05	-0.0985908	-0.0664824	-0.032027
6.22026	13_Peptide-MeOH_1.00_dimer.out	-362.2	-363.711	-362.223	-363.809	-362.229	-363.84	-247.103	-248.14	-247.118	-248.207	-247.122	-248.227	-115.092	-115.561	-115.1	-115.593	-115.101	-115.603	-115.092	-115.561	-115.1	-115.593	-115.101	-115.603	-247.103	-248.14	-247.118	-248.207	-247.122	-248.227		-5.09494e-05	-0.0985603	-0.0664824	-0.032027
6.05408	13_Peptide-MeOH_1.05_dimer.out	-362.2	-363.711	-362.224	-363.809	-362.229	-363.84	-247.103	-248.14	-247.118	-248.207	-247.122	-248.227	-115.092	-115.561	-115.1	-115.593	-115.101	-115.603	-115.092	-115.561	-115.1	-115.593	-115.101	-115.603	-247.103	-248.14	-247.118	-248.207	-247.122	-248.227		-5.65969e-05	-0.0985659	-0.0664824	-0.032027
5.75857	13_Peptide-MeOH_1.10_dimer.out	-362.2	-363.71	-362.224	-363.809	-362.229	-363.839	-247.103	-248.14	-247.118	-248.207	-247.122	-248.227	-115.092	-115.561	-115.1	-115.593	-115.101	-115.603	-115.092	-115.561	-115.1	-115.593	-115.101	-115.603	-247.103	-248.14	-247.118	-248.207	-247.122	-248.227		-2.57465e-05	-0.0985351	-0.0664824	-0.032027
4.60846	13_Peptide-MeOH_1.25_dimer.out	-362.2	-363.708	-362.223	-363.807	-362.229	-363.837	-247.103	-248.14	-247.118	-248.207	-247.122	-248.227	-115.092	-115.561	-115.1	-115.593	-115.101	-115.603	-115.092	-115.561	-115.1	-115.593	-115.101	-115.603	-247.103	-248.14	-247.118	-248.207	-247.122	-248.227		6.38427e-06	-0.0985029	-0.0664824	-0.032027
2.94801	13_Peptide-MeOH_1.50_dimer.out	-362.198	-363.706	-362.222	-363.804	-362.227	-363.835	-247.103	-248.14	-247.118	-248.207	-247.122	-248.227	-115.092	-115.561	-115.1	-115.593	-115.101	-115.603	-115.092	-115.561	-115.1	-115.593	-115.101	-115.603	-247.103	-248.14	-247.118	-248.207	-247.122	-248.227		7.47835e-06	-0.0985018	-0.0664824	-0.032027
1.30709	13_Peptide-MeOH_2.00_dimer.out	-362.196	-363.703	-362.22	-363.802	-362.225	-363.832	-247.103	-248.14	-247.118	-248.207	-247.122	-248.227	-115.092	-115.561	-115.1	-115.593	-115.101	-115.603	-115.092	-115.561	-115.1	-115.593	-115.101	-115.603	-247.103	-248.14	-247.118	-248.207	-247.122	-248.227		1.7591e-05	-0.0984917	-0.0664824	-0.032027
6.90681	14_Peptide-MeNH2_0.90_dimer.out	-342.36	-343.855	-342.382	-343.948	-342.387	-343.977	-247.102	-248.14	-247.118	-248.206	-247.121	-248.227	-95.2552	-95.7046	-95.2613	-95.7311	-95.2628	-95.7391	-95.2553	-95.705	-95.2614	-95.7312	-95.2628	-95.7391	-247.102	-248.14	-247.118	-248.206	-247.121	-248.227		-6.82605e-05	-0.0930271	-0.0664628	-0.026496
7.41129	14_Peptide-MeNH2_0.95_dimer.out	-342.362	-343.856	-342.384	-343.949	-342.389	-343.977	-247.102	-248.14	-247.118	-248.206	-247.121	-248.227	-95.2552	-95.7046	-95.2613	-95.7311	-95.2628	-95.7391	-95.2553	-95.7049	-95.2614	-95.7312	-95.2628	-95.7391	-247.102	-248.14	-247.118	-248.206	-247.121	-248.227		-6.03903e-05	-0.0930192	-0.0664628	-0.026496
7.50022	14_Peptide-MeNH2_1.00_dimer.out	-342.363	-343.856	-342.385	-343.949	-342.39	-343.978	-247.102	-248.14	-247.118	-248.206	-247.121	-248.227	-95.2552	-95.7046	-95.2613	-95.7311	-95.2628	-95.7391	-95.2553	-95.7049	-95.2614	-95.7312	-95.2628	-95.7391	-247.102	-248.14	-247.118	-248.206	-247.121	-248.227		-6.11459e-05	-0.09302	-0.0664628	-0.026496
7.32364	14_Peptide-MeNH2_1.05_dimer.out	-342.364	-343.856	-342.386	-343.949	-342.391	-343.977	-247.102	-248.14	-247.118	-248.206	-247.121	-248.227	-95.2552	-95.7046	-95.2613	-95.7311	-95.2628	-95.7391	-95.2553	-95.7048	-95.2614	-95.7312	-95.2628	-95.7391	-247.102	-248.14	-247.118	-248.206	-247.121	-248.227		-6.20238e-05	-0.0930208	-0.0664628	-0.026496
6.98556	14_Peptide-MeNH2_1.10_dimer.out	-342.364	-343.855	-342.386	-343.948	-342.391	-343.977	-247.102	-248.14	-247.118	-248.206	-247.121	-248.227	-95.2552	-95.7046	-95.2613	-95.7311	-95.2628	-95.7391	-95.2553	-95.7048	-95.2614	-95.7312	-95.2628	-95.7391	-247.102	-248.14	-247.118	-248.206	-247.121	-248.227		-4.95151e-05	-0.0930083	-0.0664628	-0.026496
5.61042	14_Peptide-MeNH2_1.25_dimer.out	-342.364	-343.853	-342.385	-343.946	-342.39	-343.975	-247.102	-248.14	-247.118	-248.206	-247.121	-248.227	-95.2552	-95.7046	-95.2613	-95.7311	-95.2628	-95.7391	-95.2552	-95.7047	-95.2613	-95.7311	-95.2628	-95.7391	-247.102	-248.14	-247.118	-248.206	-247.121	-248.227		-1.70879e-05	-0.0929759	-0.0664628	-0.026496
3.54879	14_Peptide-MeNH2_1.50_dimer.out	-342.362	-343.85	-342.384	-343.943	-342.389	-343.971	-247.102	-248.14	-247.118	-248.206	-247.121	-248.227	-95.2552	-95.7046	-95.2613	-95.7311	-95.2628	-95.7391	-95.2552	-95.7047	-95.2613	-95.7311	-95.2628	-95.7391	-247.102	-248.14	-247.118	-248.206	-247.121	-248.227		1.52562e-05	-0.0929436	-0.0664628	-0.026496
1.4882	14_Peptide-MeNH2_2.00_dimer.out	-342.36	-343.847	-342.381	-343.94	-342.386	-343.968	-247.102	-248.14	-247.118	-248.206	-247.121	-248.227	-95.2552	-95.7046	-95.2613	-95.7311	-95.2628	-95.7391	-95.2552	-95.7046	-95.2613	-95.7311	-95.2628	-95.7391	-247.102	-248.14	-247.118	-248.206	-247.121	-248.227		2.61448e-05	-0.0929327	-0.0664628	-0.026496
8.09631	15_Peptide-Peptide_0.90_dimer.out	-494.209	-496.292	-494.24	-496.425	-494.247	-496.466	-247.102	-248.14	-247.117	-248.206	-247.121	-248.227	-247.102	-248.14	-247.118	-248.206	-247.121	-248.227	-247.102	-248.14	-247.118	-248.207	-247.121	-248.227	-247.102	-248.14	-247.118	-248.206	-247.121	-248.227		-0.000125192	-0.133039	-0.0664521	-0.066462
8.58646	15_Peptide-Peptide_0.95_dimer.out	-494.211	-496.293	-494.242	-496.426	-494.249	-496.467	-247.102	-248.14	-247.117	-248.206	-247.121	-248.227	-247.102	-248.14	-247.118	-248.206	-247.121	-248.227	-247.102	-248.14	-247.118	-248.206	-247.121	-248.227	-247.102	-248.14	-247.118	-248.206	-247.121	-248.227		-0.000113876	-0.133028	-0.0664521	-0.066462
8.65929	15_Peptide-Peptide_1.00_dimer.out	-494.212	-496.293	-494.243	-496.426	-494.25	-496.467	-247.102	-248.14	-247.117	-248.206	-247.121	-248.227	-247.102	-248.14	-247.118	-248.206	-247.121	-248.227	-247.102	-248.14	-247.118	-248.206	-247.121	-248.227	-247.102	-248.14	-247.118	-248.206	-247.121	-248.227		-8.89478e-05	-0.133003	-0.0664521	-0.066462
8.46406	15_Peptide-Peptide_1.05_dimer.out	-494.212	-496.293	-494.243	-496.426	-494.251	-496.467	-247.102	-248.14	-247.117	-248.206	-247.121	-248.227	-247.102	-248.14	-247.118	-248.206	-247.121	-248.227	-247.102	-248.14	-247.118	-248.206	-247.121	-248.227	-247.102	-248.14	-247.118	-248.206	-247.121	-248.227		-7.8495e-05	-0.132993	-0.0664521	-0.066462
8.10479	15_Peptide-Peptide_1.10_dimer.out	-494.212	-496.292	-494.244	-496.425	-494.251	-496.466	-247.102	-248.14	-247.117	-248.206	-247.121	-248.227	-247.102	-248.14	-247.118	-248.206	-247.121	-248.227	-247.102	-248.14	-247.118	-248.206	-247.121	-248.227	-247.102	-248.14	-247.118	-248.206	-247.121	-248.227		-4.63241e-05	-0.13296	-0.0664521	-0.066462
6.64877	15_Peptide-Peptide_1.25_dimer.out	-494.212	-496.29	-494.243	-496.423	-494.25	-496.464	-247.102	-248.14	-247.117	-248.206	-247.121	-248.227	-247.102	-248.14	-247.118	-248.206	-247.121	-248.227	-247.102	-248.14	-247.118	-248.206	-247.121	-248.227	-247.102	-248.14	-247.117	-248.206	-247.121	-248.227		-1.3311e-05	-0.132927	-0.0664521	-0.066462
4.40743	15_Peptide-Peptide_1.50_dimer.out	-494.21	-496.287	-494.241	-496.42	-494.248	-496.46	-247.102	-248.14	-247.117	-248.206	-247.121	-248.227	-247.102	-248.14	-247.118	-248.206	-247.121	-248.227	-247.102	-248.14	-247.118	-248.206	-247.121	-248.227	-247.102	-248.14	-247.117	-248.206	-247.121	-248.227		7.68806e-06	-0.132906	-0.0664521	-0.066462
1.7751	15_Peptide-Peptide_2.00_dimer.out	-494.207	-496.283	-494.238	-496.415	-494.245	-496.456	-247.102	-248.14	-247.117	-248.206	-247.121	-248.227	-247.102	-248.14	-247.118	-248.206	-247.121	-248.227	-247.102	-248.14	-247.118	-248.206	-247.121	-248.227	-247.102	-248.14	-247.117	-248.206	-247.121	-248.227		1.22875e-05	-0.132902	-0.0664521	-0.066462
4.76122	16_Peptide-Water_0.90_dimer.out	-323.166	-324.489	-323.187	-324.577	-323.192	-324.605	-247.102	-248.14	-247.118	-248.206	-247.121	-248.227	-76.0603	-76.3416	-76.0658	-76.3636	-76.0671	-76.3706	-76.0604	-76.3419	-76.0658	-76.3637	-76.0671	-76.3707	-247.102	-248.14	-247.118	-248.206	-247.121	-248.227		-6.12771e-05	-0.0885537	-0.0664736	-0.0220189
5.10831	16_Peptide-Water_0.95_dimer.out	-323.167	-324.49	-323.189	-324.578	-323.193	-324.606	-247.102	-248.14	-247.118	-248.206	-247.121	-248.227	-76.0603	-76.3416	-76.0658	-76.3636	-76.0671	-76.3706	-76.0604	-76.3418	-76.0658	-76.3637	-76.0671	-76.3706	-247.102	-248.14	-247.118	-248.206	-247.121	-248.227		-3.6629e-05	-0.0885291	-0.0664736	-0.0220189
5.14965	16_Peptide-Water_1.00_dimer.out	-323.168	-324.49	-323.189	-324.578	-323.194	-324.606	-247.102	-248.14	-247.118	-248.206	-247.121	-248.227	-76.0603	-76.3416	-76.0658	-76.3636	-76.0671	-76.3706	-76.0604	-76.3418	-76.0658	-76.3637	-76.0671	-76.3706	-247.102	-248.14	-247.118	-248.206	-247.121	-248.227		-1.47227e-05	-0.0885072	-0.0664736	-0.0220189
5.00493	16_Peptide-Water_1.05_dimer.out	-323.168	-324.489	-323.189	-324.578	-323.194	-324.605	-247.102	-248.14	-247.118	-248.206	-247.121	-248.227	-76.0603	-76.3416	-76.0658	-76.3636	-76.0671	-76.3706	-76.0604	-76.3418	-76.0658	-76.3636	-76.0671	-76.3706	-247.102	-248.14	-247.118	-248.206	-247.121	-248.227		3.88422e-06	-0.0884886	-0.0664736	-0.0220189
4.75391	16_Peptide-Water_1.10_dimer.out	-323.168	-324.489	-323.189	-324.578	-323.194	-324.605	-247.102	-248.14	-247.118	-248.206	-247.121	-248.227	-76.0603	-76.3416	-76.0658	-76.3636	-76.0671	-76.3706	-76.0604	-76.3418	-76.0658	-76.3636	-76.0671	-76.3706	-247.102	-248.14	-247.118	-248.206	-247.121	-248.227		3.82705e-05	-0.0884542	-0.0664736	-0.0220189
3.79918	16_Peptide-Water_1.25_dimer.out	-323.168	-324.488	-323.189	-324.576	-323.194	-324.604	-247.102	-248.14	-247.118	-248.206	-247.121	-248.227	-76.0603	-76.3416	-76.0658	-76.3636	-76.0671	-76.3706	-76.0604	-76.3417	-76.0658	-76.3636	-76.0671	-76.3706	-247.102	-248.14	-247.118	-248.206	-247.121	-248.227		4.07638e-05	-0.0884517	-0.0664736	-0.0220189
2.45383	16_Peptide-Water_1.50_dimer.out	-323.166	-324.485	-323.187	-324.574	-323.192	-324.601	-247.102	-248.14	-247.118	-248.206	-247.121	-248.227	-76.0603	-76.3416	-76.0658	-76.3636	-76.0671	-76.3706	-76.0603	-76.3417	-76.0658	-76.3636	-76.0671	-76.3706	-247.102	-248.14	-247.118	-248.206	-247.121	-248.227		5.28335e-05	-0.0884396	-0.0664736	-0.0220189
1.13683	16_Peptide-Water_2.00_dimer.out	-323.164	-324.483	-323.185	-324.572	-323.19	-324.599	-247.102	-248.14	-247.118	-248.206	-247.121	-248.227	-76.0603	-76.3416	-76.0658	-76.3636	-76.0671	-76.3706	-76.0603	-76.3416	-76.0658	-76.3636	-76.0671	-76.3706	-247.102	-248.14	-247.118	-248.206	-247.121	-248.227		5.47792e-05	-0.0884377	-0.0664736	-0.0220189
16.0658	17_Uracil-Uracil_BP_0.90_dimer.out	-825.261	-828.433	-825.312	-828.649	-825.323	-828.716	-412.622	-414.204	-412.648	-414.312	-412.654	-414.345	-412.623	-414.204	-412.648	-414.312	-412.654	-414.346	-412.623	-414.205	-412.648	-414.312	-412.654	-414.346	-412.623	-414.205	-412.648	-414.312	-412.654	-414.345		-1.28568e-05	-0.215922	-0.10796	-0.107949
17.1875	17_Uracil-Uracil_BP_0.95_dimer.out	-825.264	-828.435	-825.315	-828.651	-825.327	-828.718	-412.622	-414.204	-412.648	-414.312	-412.654	-414.345	-412.623	-414.204	-412.648	-414.312	-412.654	-414.346	-412.623	-414.205	-412.648	-414.312	-412.654	-414.346	-412.623	-414.205	-412.648	-414.312	-412.654	-414.345		-0.000119991	-0.216029	-0.10796	-0.107949
17.4054	17_Uracil-Uracil_BP_1.00_dimer.out	-825.266	-828.435	-825.317	-828.651	-825.328	-828.718	-412.622	-414.204	-412.648	-414.312	-412.654	-414.345	-412.623	-414.204	-412.648	-414.312	-412.654	-414.346	-412.623	-414.205	-412.648	-414.312	-412.654	-414.346	-412.623	-414.204	-412.648	-414.312	-412.654	-414.345		-0.000107453	-0.216016	-0.10796	-0.107949
17.0338	17_Uracil-Uracil_BP_1.05_dimer.out	-825.266	-828.435	-825.318	-828.65	-825.329	-828.718	-412.622	-414.204	-412.648	-414.312	-412.654	-414.345	-412.623	-414.204	-412.648	-414.312	-412.654	-414.346	-412.623	-414.205	-412.648	-414.312	-412.654	-414.346	-412.623	-414.204	-412.648	-414.312	-412.654	-414.345		-7.82175e-05	-0.215987	-0.10796	-0.107949
16.293	17_Uracil-Uracil_BP_1.10_dimer.out	-825.266	-828.433	-825.317	-828.649	-825.328	-828.717	-412.622	-414.204	-412.648	-414.312	-412.654	-414.345	-412.623	-414.204	-412.648	-414.312	-412.654	-414.346	-412.623	-414.204	-412.648	-414.312	-412.654	-414.346	-412.623	-414.204	-412.648	-414.312	-412.654	-414.345		-3.38264e-05	-0.215943	-0.10796	-0.107949
13.1904	17_Uracil-Uracil_BP_1.25_dimer.out	-825.263	-828.429	-825.314	-828.645	-825.325	-828.712	-412.622	-414.204	-412.648	-414.312	-412.654	-414.345	-412.623	-414.204	-412.648	-414.312	-412.654	-414.346	-412.623	-414.204	-412.648	-414.312	-412.654	-414.346	-412.622	-414.204	-412.648	-414.312	-412.654	-414.345		5.46253e-05	-0.215854	-0.10796	-0.107949
8.35706	17_Uracil-Uracil_BP_1.50_dimer.out	-825.257	-828.421	-825.308	-828.637	-825.32	-828.704	-412.622	-414.204	-412.648	-414.312	-412.654	-414.345	-412.623	-414.204	-412.648	-414.312	-412.654	-414.346	-412.623	-414.204	-412.648	-414.312	-412.654	-414.346	-412.622	-414.204	-412.648	-414.312	-412.654	-414.345		1.0511e-05	-0.215898	-0.10796	-0.107949
3.33743	17_Uracil-Uracil_BP_2.00_dimer.out	-825.25	-828.413	-825.302	-828.629	-825.313	-828.696	-412.622	-414.204	-412.648	-414.312	-412.654	-414.345	-412.623	-414.204	-412.648	-414.312	-412.654	-414.346	-412.623	-414.204	-412.648	-414.312	-412.654	-414.346	-412.622	-414.204	-412.648	-414.312	-412.654	-414.345		3.13026e-05	-0.215878	-0.10796	-0.107949
6.4838	18_Water-Pyridine_0.90_dimer.out	-322.844	-324.198	-322.863	-324.283	-322.868	-324.309	-76.0598	-76.3415	-76.0652	-76.3634	-76.0666	-76.3705	-246.779	-247.846	-246.793	-247.909	-246.796	-247.928	-246.779	-247.847	-246.793	-247.909	-246.796	-247.928	-76.0599	-76.3419	-76.0653	-76.3636	-76.0666	-76.3705		-3.42527e-05	-0.0848554	-0.021973	-0.0628482
6.87005	18_Water-Pyridine_0.95_dimer.out	-322.845	-324.199	-322.865	-324.284	-322.869	-324.309	-76.0598	-76.3415	-76.0652	-76.3634	-76.0666	-76.3705	-246.779	-247.846	-246.793	-247.909	-246.796	-247.928	-246.779	-247.847	-246.793	-247.909	-246.796	-247.928	-76.0599	-76.3418	-76.0652	-76.3635	-76.0666	-76.3705		1.02829e-05	-0.0848108	-0.021973	-0.0628482
6.87888	18_Water-Pyridine_1.00_dimer.out	-322.846	-324.199	-322.865	-324.284	-322.87	-324.31	-76.0598	-76.3415	-76.0652	-76.3634	-76.0666	-76.3705	-246.779	-247.846	-246.793	-247.909	-246.796	-247.928	-246.779	-247.847	-246.793	-247.909	-246.796	-247.928	-76.0599	-76.3418	-76.0652	-76.3635	-76.0666	-76.3705		2.65366e-05	-0.0847946	-0.021973	-0.0628482
6.65261	18_Water-Pyridine_1.05_dimer.out	-322.846	-324.199	-322.866	-324.283	-322.87	-324.309	-76.0598	-76.3415	-76.0652	-76.3634	-76.0666	-76.3705	-246.779	-247.846	-246.793	-247.909	-246.796	-247.928	-246.779	-247.847	-246.793	-247.909	-246.796	-247.928	-76.0599	-76.3417	-76.0652	-76.3635	-76.0666	-76.3705		4.40796e-05	-0.0847771	-0.021973	-0.0628482
6.28924	18_Water-Pyridine_1.10_dimer.out	-322.846	-324.198	-322.865	-324.283	-322.87	-324.309	-76.0598	-76.3415	-76.0652	-76.3634	-76.0666	-76.3705	-246.779	-247.846	-246.793	-247.909	-246.796	-247.928	-246.779	-247.847	-246.793	-247.909	-246.796	-247.928	-76.0598	-76.3417	-76.0652	-76.3635	-76.0666	-76.3705		5.30374e-05	-0.0847681	-0.021973	-0.0628482
4.92902	18_Water-Pyridine_1.25_dimer.out	-322.845	-324.196	-322.864	-324.281	-322.869	-324.306	-76.0598	-76.3415	-76.0652	-76.3634	-76.0666	-76.3705	-246.779	-247.846	-246.793	-247.909	-246.796	-247.928	-246.779	-247.847	-246.793	-247.909	-246.796	-247.928	-76.0598	-76.3417	-76.0652	-76.3635	-76.0666	-76.3705		6.90049e-05	-0.0847521	-0.021973	-0.0628482
3.00623	18_Water-Pyridine_1.50_dimer.out	-322.842	-324.193	-322.862	-324.278	-322.867	-324.303	-76.0598	-76.3415	-76.0652	-76.3634	-76.0666	-76.3705	-246.779	-247.846	-246.793	-247.909	-246.796	-247.928	-246.779	-247.846	-246.793	-247.909	-246.796	-247.928	-76.0598	-76.3416	-76.0652	-76.3635	-76.0666	-76.3705		4.56529e-05	-0.0847755	-0.021973	-0.0628482
1.18444	18_Water-Pyridine_2.00_dimer.out	-322.84	-324.19	-322.86	-324.275	-322.864	-324.301	-76.0598	-76.3415	-76.0652	-76.3634	-76.0666	-76.3705	-246.779	-247.846	-246.793	-247.909	-246.796	-247.928	-246.779	-247.846	-246.793	-247.909	-246.796	-247.928	-76.0598	-76.3415	-76.0652	-76.3635	-76.0666	-76.3705		-2.77524e-06	-0.0848239	-0.021973	-0.0628482
6.8755	19_MeOH-Pyridine_0.90_dimer.out	-361.874	-363.418	-361.896	-363.513	-361.901	-363.542	-115.091	-115.561	-115.099	-115.593	-115.101	-115.603	-246.779	-247.846	-246.793	-247.909	-246.796	-247.928	-246.779	-247.847	-246.793	-247.909	-246.796	-247.928	-115.091	-115.561	-115.099	-115.593	-115.101	-115.603		-3.78115e-06	-0.0948701	-0.0320149	-0.0628514
7.37372	19_MeOH-Pyridine_0.95_dimer.out	-361.876	-363.419	-361.898	-363.514	-361.903	-363.543	-115.091	-115.561	-115.099	-115.593	-115.101	-115.603	-246.779	-247.846	-246.793	-247.909	-246.796	-247.928	-246.779	-247.847	-246.793	-247.909	-246.796	-247.928	-115.091	-115.561	-115.099	-115.593	-115.101	-115.603		2.19373e-05	-0.0948444	-0.0320149	-0.0628514
7.44822	19_MeOH-Pyridine_1.00_dimer.out	-361.877	-363.419	-361.899	-363.514	-361.904	-363.543	-115.091	-115.561	-115.099	-115.593	-115.101	-115.603	-246.779	-247.846	-246.793	-247.909	-246.796	-247.928	-246.779	-247.847	-246.793	-247.909	-246.796	-247.928	-115.091	-115.561	-115.099	-115.593	-115.101	-115.603		4.44679e-05	-0.0948218	-0.0320149	-0.0628514
7.25343	19_MeOH-Pyridine_1.05_dimer.out	-361.877	-363.419	-361.899	-363.514	-361.904	-363.542	-115.091	-115.561	-115.099	-115.593	-115.101	-115.603	-246.779	-247.846	-246.793	-247.909	-246.796	-247.928	-246.779	-247.847	-246.793	-247.909	-246.796	-247.928	-115.091	-115.561	-115.099	-115.593	-115.101	-115.603		7.24232e-05	-0.0947939	-0.0320149	-0.0628514
6.89666	19_MeOH-Pyridine_1.10_dimer.out	-361.877	-363.418	-361.899	-363.513	-361.904	-363.542	-115.091	-115.561	-115.099	-115.593	-115.101	-115.603	-246.779	-247.846	-246.793	-247.909	-246.796	-247.928	-246.779	-247.847	-246.793	-247.909	-246.796	-247.928	-115.091	-115.561	-115.099	-115.593	-115.101	-115.603		9.16278e-05	-0.0947747	-0.0320149	-0.0628514
5.47291	19_MeOH-Pyridine_1.25_dimer.out	-361.876	-363.416	-361.898	-363.511	-361.903	-363.54	-115.091	-115.561	-115.099	-115.593	-115.101	-115.603	-246.779	-247.846	-246.793	-247.909	-246.796	-247.928	-246.779	-247.847	-246.793	-247.909	-246.796	-247.928	-115.091	-115.561	-115.099	-115.593	-115.101	-115.603		8.56705e-05	-0.0947806	-0.0320149	-0.0628514
3.37293	19_MeOH-Pyridine_1.50_dimer.out	-361.874	-363.413	-361.896	-363.507	-361.901	-363.536	-115.091	-115.561	-115.099	-115.593	-115.101	-115.603	-246.779	-247.846	-246.793	-247.909	-246.796	-247.928	-246.779	-247.847	-246.793	-247.909	-246.796	-247.928	-115.091	-115.561	-115.099	-115.593	-115.101	-115.603		8.24245e-05	-0.0947839	-0.0320149	-0.0628514
1.32821	19_MeOH-Pyridine_2.00_dimer.out	-361.872	-363.409	-361.894	-363.504	-361.898	-363.533	-115.091	-115.561	-115.099	-115.593	-115.101	-115.603	-246.779	-247.846	-246.793	-247.909	-246.796	-247.928	-246.779	-247.846	-246.793	-247.909	-246.796	-247.928	-115.091	-115.561	-115.099	-115.593	-115.101	-115.603		1.70444e-05	-0.0948493	-0.0320149	-0.0628514
17.9251	20_AcOH-AcOH_0.90_dimer.out	-455.826	-457.564	-455.855	-457.687	-455.862	-457.726	-227.902	-228.768	-227.917	-228.829	-227.921	-228.849	-227.902	-228.768	-227.917	-228.829	-227.921	-228.849	-227.903	-228.769	-227.917	-228.83	-227.921	-228.849	-227.903	-228.769	-227.917	-228.83	-227.921	-228.849		-0.000170964	-0.122766	-0.0612992	-0.0612958
19.1701	20_AcOH-AcOH_0.95_dimer.out	-455.829	-457.566	-455.858	-457.689	-455.865	-457.728	-227.902	-228.768	-227.917	-228.829	-227.921	-228.849	-227.902	-228.768	-227.917	-228.829	-227.921	-228.849	-227.903	-228.769	-227.917	-228.83	-227.921	-228.849	-227.903	-228.769	-227.917	-228.83	-227.921	-228.849		-0.000180743	-0.122776	-0.0612992	-0.0612958
19.3967	20_AcOH-AcOH_1.00_dimer.out	-455.83	-457.566	-455.86	-457.689	-455.866	-457.728	-227.902	-228.768	-227.917	-228.829	-227.921	-228.849	-227.902	-228.768	-227.917	-228.829	-227.921	-228.849	-227.903	-228.769	-227.917	-228.83	-227.921	-228.849	-227.903	-228.769	-227.917	-228.83	-227.921	-228.849		-0.0003183	-0.122913	-0.0612992	-0.0612958
18.9647	20_AcOH-AcOH_1.05_dimer.out	-455.83	-457.566	-455.86	-457.689	-455.866	-457.727	-227.902	-228.768	-227.917	-228.829	-227.921	-228.849	-227.902	-228.768	-227.917	-228.829	-227.921	-228.849	-227.903	-228.769	-227.917	-228.829	-227.921	-228.849	-227.903	-228.769	-227.917	-228.829	-227.921	-228.849		-0.000320613	-0.122916	-0.0612992	-0.0612958
18.1251	20_AcOH-AcOH_1.10_dimer.out	-455.829	-457.564	-455.859	-457.687	-455.866	-457.726	-227.902	-228.768	-227.917	-228.829	-227.921	-228.849	-227.902	-228.768	-227.917	-228.829	-227.921	-228.849	-227.903	-228.769	-227.917	-228.829	-227.921	-228.849	-227.903	-228.769	-227.917	-228.829	-227.921	-228.849		-0.000253514	-0.122849	-0.0612992	-0.0612958
14.6347	20_AcOH-AcOH_1.25_dimer.out	-455.826	-457.559	-455.855	-457.682	-455.862	-457.721	-227.902	-228.768	-227.917	-228.829	-227.921	-228.849	-227.902	-228.768	-227.917	-228.829	-227.921	-228.849	-227.902	-228.768	-227.917	-228.829	-227.921	-228.849	-227.902	-228.768	-227.917	-228.829	-227.921	-228.849		-0.00013934	-0.122734	-0.0612992	-0.0612958
9.21926	20_AcOH-AcOH_1.50_dimer.out	-455.819	-457.551	-455.848	-457.673	-455.855	-457.712	-227.902	-228.768	-227.917	-228.829	-227.921	-228.849	-227.902	-228.768	-227.917	-228.829	-227.921	-228.849	-227.902	-228.768	-227.917	-228.829	-227.921	-228.849	-227.902	-228.768	-227.917	-228.829	-227.921	-228.849		-3.75297e-05	-0.122633	-0.0612992	-0.0612958
3.59408	20_AcOH-AcOH_2.00_dimer.out	-455.811	-457.542	-455.84	-457.664	-455.847	-457.703	-227.902	-228.768	-227.917	-228.829	-227.921	-228.849	-227.902	-228.768	-227.917	-228.829	-227.921	-228.849	-227.902	-228.768	-227.917	-228.829	-227.921	-228.849	-227.902	-228.768	-227.917	-228.829	-227.921	-228.849		-1.50779e-06	-0.122597	-0.0612992	-0.0612958
15.2739	21_AcNH2-AcNH2_0.90_dimer.out	-416.138	-417.835	-416.164	-417.947	-416.17	-417.982	-208.061	-208.906	-208.074	-208.962	-208.077	-208.979	-208.061	-208.906	-208.074	-208.962	-208.077	-208.979	-208.061	-208.906	-208.074	-208.962	-208.077	-208.979	-208.061	-208.906	-208.074	-208.962	-208.077	-208.979		-0.000373602	-0.112618	-0.0561216	-0.0561228
16.2994	21_AcNH2-AcNH2_0.95_dimer.out	-416.141	-417.836	-416.167	-417.949	-416.173	-417.984	-208.061	-208.906	-208.074	-208.962	-208.077	-208.979	-208.061	-208.906	-208.074	-208.962	-208.077	-208.979	-208.061	-208.906	-208.074	-208.962	-208.077	-208.979	-208.061	-208.906	-208.074	-208.962	-208.077	-208.979		-0.000320128	-0.112565	-0.0561216	-0.0561228
16.4717	21_AcNH2-AcNH2_1.00_dimer.out	-416.142	-417.837	-416.169	-417.949	-416.175	-417.984	-208.061	-208.906	-208.074	-208.962	-208.077	-208.979	-208.061	-208.906	-208.074	-208.962	-208.077	-208.979	-208.061	-208.906	-208.074	-208.962	-208.077	-208.979	-208.061	-208.906	-208.074	-208.962	-208.077	-208.979		-0.000282577	-0.112527	-0.0561216	-0.0561228
16.094	21_AcNH2-AcNH2_1.05_dimer.out	-416.142	-417.836	-416.169	-417.949	-416.175	-417.984	-208.061	-208.906	-208.074	-208.962	-208.077	-208.979	-208.061	-208.906	-208.074	-208.962	-208.077	-208.979	-208.061	-208.906	-208.074	-208.962	-208.077	-208.979	-208.061	-208.906	-208.074	-208.962	-208.077	-208.979		-0.00023427	-0.112479	-0.0561216	-0.0561228
15.3796	21_AcNH2-AcNH2_1.10_dimer.out	-416.142	-417.835	-416.169	-417.948	-416.175	-417.982	-208.061	-208.906	-208.074	-208.962	-208.077	-208.979	-208.061	-208.906	-208.074	-208.962	-208.077	-208.979	-208.061	-208.906	-208.074	-208.962	-208.077	-208.979	-208.061	-208.906	-208.074	-208.962	-208.077	-208.979		-0.000215174	-0.11246	-0.0561216	-0.0561228
12.4598	21_AcNH2-AcNH2_1.25_dimer.out	-416.139	-417.831	-416.166	-417.943	-416.172	-417.978	-208.061	-208.906	-208.074	-208.962	-208.077	-208.979	-208.061	-208.906	-208.074	-208.962	-208.077	-208.979	-208.061	-208.906	-208.074	-208.962	-208.077	-208.979	-208.061	-208.906	-208.074	-208.962	-208.077	-208.979		-0.000103488	-0.112348	-0.0561216	-0.0561228
8.00668	21_AcNH2-AcNH2_1.50_dimer.out	-416.134	-417.824	-416.161	-417.936	-416.167	-417.971	-208.061	-208.906	-208.074	-208.962	-208.077	-208.979	-208.061	-208.906	-208.074	-208.962	-208.077	-208.979	-208.061	-208.906	-208.074	-208.962	-208.077	-208.979	-208.061	-208.906	-208.074	-208.962	-208.077	-208.979		-4.79689e-05	-0.112292	-0.0561216	-0.0561228
3.00804	21_AcNH2-AcNH2_2.00_dimer.out	-416.127	-417.816	-416.154	-417.928	-416.16	-417.963	-208.061	-208.906	-208.074	-208.962	-208.077	-208.979	-208.061	-208.906	-208.074	-208.962	-208.077	-208.979	-208.061	-208.906	-208.074	-208.962	-208.077	-208.979	-208.061	-208.906	-208.074	-208.962	-208.077	-208.979		-2.0668e-05	-0.112265	-0.0561216	-0.0561228
18.3243	22_AcOH-Uracil_0.90_dimer.out	-640.546	-643	-640.586	-643.17	-640.595	-643.223	-227.902	-228.768	-227.917	-228.829	-227.921	-228.849	-412.622	-414.204	-412.648	-414.312	-412.654	-414.345	-412.623	-414.205	-412.648	-414.312	-412.654	-414.345	-227.903	-228.769	-227.917	-228.83	-227.921	-228.849		-7.76865e-05	-0.169325	-0.061299	-0.107949
19.5241	22_AcOH-Uracil_0.95_dimer.out	-640.549	-643.002	-640.589	-643.172	-640.598	-643.225	-227.902	-228.768	-227.917	-228.829	-227.921	-228.849	-412.622	-414.204	-412.648	-414.312	-412.654	-414.345	-412.623	-414.205	-412.648	-414.312	-412.654	-414.345	-227.903	-228.769	-227.917	-228.83	-227.921	-228.849		-0.000176959	-0.169425	-0.061299	-0.107949
19.7586	22_AcOH-Uracil_1.00_dimer.out	-640.55	-643.002	-640.591	-643.172	-640.599	-643.225	-227.902	-228.768	-227.917	-228.829	-227.921	-228.849	-412.622	-414.204	-412.648	-414.312	-412.654	-414.345	-412.622	-414.204	-412.648	-414.312	-412.654	-414.345	-227.903	-228.769	-227.917	-228.829	-227.921	-228.849		-0.000244563	-0.169492	-0.061299	-0.107949
19.3605	22_AcOH-Uracil_1.05_dimer.out	-640.55	-643.002	-640.591	-643.171	-640.6	-643.224	-227.902	-228.768	-227.917	-228.829	-227.921	-228.849	-412.622	-414.204	-412.648	-414.312	-412.654	-414.345	-412.622	-414.204	-412.648	-414.312	-412.654	-414.345	-227.903	-228.769	-227.917	-228.829	-227.921	-228.849		-0.000222238	-0.16947	-0.061299	-0.107949
18.5649	22_AcOH-Uracil_1.10_dimer.out	-640.55	-643.001	-640.59	-643.17	-640.599	-643.223	-227.902	-228.768	-227.917	-228.829	-227.921	-228.849	-412.622	-414.204	-412.648	-414.312	-412.654	-414.345	-412.622	-414.204	-412.648	-414.312	-412.654	-414.345	-227.903	-228.768	-227.917	-228.829	-227.921	-228.849		-0.000182012	-0.16943	-0.061299	-0.107949
15.1977	22_AcOH-Uracil_1.25_dimer.out	-640.546	-642.996	-640.587	-643.165	-640.596	-643.218	-227.902	-228.768	-227.917	-228.829	-227.921	-228.849	-412.622	-414.204	-412.648	-414.312	-412.654	-414.345	-412.622	-414.204	-412.648	-414.312	-412.654	-414.345	-227.903	-228.768	-227.917	-228.829	-227.921	-228.849		-8.45067e-05	-0.169332	-0.061299	-0.107949
9.86735	22_AcOH-Uracil_1.50_dimer.out	-640.54	-642.987	-640.58	-643.157	-640.589	-643.21	-227.902	-228.768	-227.917	-228.829	-227.921	-228.849	-412.622	-414.204	-412.648	-414.312	-412.654	-414.345	-412.622	-414.204	-412.648	-414.312	-412.654	-414.345	-227.902	-228.768	-227.917	-228.829	-227.921	-228.849		-4.81346e-06	-0.169253	-0.061299	-0.107949
4.14991	22_AcOH-Uracil_2.00_dimer.out	-640.532	-642.978	-640.572	-643.148	-640.581	-643.2	-227.902	-228.768	-227.917	-228.829	-227.921	-228.849	-412.622	-414.204	-412.648	-414.312	-412.654	-414.345	-412.622	-414.204	-412.648	-414.312	-412.654	-414.345	-227.902	-228.768	-227.917	-228.829	-227.921	-228.849		9.89394e-07	-0.169247	-0.061299	-0.107949
18.0758	23_AcNH2-Uracil_0.90_dimer.out	-620.703	-623.137	-620.742	-623.302	-620.75	-623.352	-208.061	-208.906	-208.074	-208.962	-208.077	-208.979	-412.622	-414.204	-412.648	-414.312	-412.653	-414.345	-412.622	-414.204	-412.648	-414.312	-412.653	-414.345	-208.061	-208.906	-208.074	-208.962	-208.077	-208.979		-0.000158206	-0.164208	-0.0561252	-0.107924
19.1946	23_AcNH2-Uracil_0.95_dimer.out	-620.706	-623.139	-620.745	-623.303	-620.753	-623.354	-208.061	-208.906	-208.074	-208.962	-208.077	-208.979	-412.622	-414.204	-412.648	-414.312	-412.653	-414.345	-412.622	-414.204	-412.648	-414.312	-412.653	-414.345	-208.061	-208.906	-208.074	-208.962	-208.077	-208.979		-0.000286849	-0.164336	-0.0561252	-0.107924
19.4317	23_AcNH2-Uracil_1.00_dimer.out	-620.708	-623.139	-620.747	-623.304	-620.755	-623.355	-208.061	-208.906	-208.074	-208.962	-208.077	-208.979	-412.622	-414.204	-412.648	-414.312	-412.653	-414.345	-412.622	-414.204	-412.648	-414.312	-412.653	-414.345	-208.061	-208.906	-208.074	-208.962	-208.077	-208.979		-0.000252841	-0.164302	-0.0561252	-0.107924
19.0856	23_AcNH2-Uracil_1.05_dimer.out	-620.708	-623.139	-620.747	-623.303	-620.755	-623.354	-208.061	-208.906	-208.074	-208.962	-208.077	-208.979	-412.622	-414.204	-412.648	-414.312	-412.653	-414.345	-412.622	-414.204	-412.648	-414.312	-412.653	-414.345	-208.061	-208.906	-208.074	-208.962	-208.077	-208.979		-0.000218912	-0.164269	-0.0561252	-0.107924
18.3674	23_AcNH2-Uracil_1.10_dimer.out	-620.708	-623.138	-620.747	-623.302	-620.755	-623.353	-208.061	-208.906	-208.074	-208.962	-208.077	-208.979	-412.622	-414.204	-412.648	-414.312	-412.653	-414.345	-412.622	-414.204	-412.648	-414.312	-412.653	-414.345	-208.061	-208.906	-208.074	-208.962	-208.077	-208.979		-0.000181755	-0.164231	-0.0561252	-0.107924
15.2646	23_AcNH2-Uracil_1.25_dimer.out	-620.705	-623.133	-620.744	-623.297	-620.752	-623.348	-208.061	-208.906	-208.074	-208.962	-208.077	-208.979	-412.622	-414.204	-412.648	-414.312	-412.653	-414.345	-412.622	-414.204	-412.648	-414.312	-412.653	-414.345	-208.061	-208.906	-208.074	-208.962	-208.077	-208.979		-8.46677e-05	-0.164134	-0.0561252	-0.107924
10.2404	23_AcNH2-Uracil_1.50_dimer.out	-620.698	-623.125	-620.737	-623.289	-620.746	-623.34	-208.061	-208.906	-208.074	-208.962	-208.077	-208.979	-412.622	-414.204	-412.648	-414.312	-412.653	-414.345	-412.622	-414.204	-412.648	-414.312	-412.653	-414.345	-208.061	-208.906	-208.074	-208.962	-208.077	-208.979		-3.65518e-05	-0.164086	-0.0561252	-0.107924
4.66191	23_AcNH2-Uracil_2.00_dimer.out	-620.691	-623.117	-620.73	-623.281	-620.738	-623.331	-208.061	-208.906	-208.074	-208.962	-208.077	-208.979	-412.622	-414.204	-412.648	-414.312	-412.653	-414.345	-412.622	-414.204	-412.648	-414.312	-412.653	-414.345	-208.061	-208.906	-208.074	-208.962	-208.077	-208.979		-5.32492e-06	-0.164055	-0.0561252	-0.107924
-0.137809	24_Benzene-Benzene_pi-pi_0.90_dimer.out	-461.541	-463.636	-461.568	-463.754	-461.573	-463.789	-230.781	-231.818	-230.794	-231.877	-230.797	-231.895	-230.781	-231.818	-230.794	-231.877	-230.797	-231.895	-230.781	-231.819	-230.794	-231.877	-230.797	-231.895	-230.781	-231.819	-230.794	-231.877	-230.797	-231.895		0.000350107	-0.118463	-0.0594064	-0.0594064
1.79077	24_Benzene-Benzene_pi-pi_0.95_dimer.out	-461.549	-463.639	-461.576	-463.757	-461.581	-463.792	-230.781	-231.818	-230.794	-231.877	-230.797	-231.895	-230.781	-231.818	-230.794	-231.877	-230.797	-231.895	-230.781	-231.818	-230.794	-231.877	-230.797	-231.895	-230.781	-231.818	-230.794	-231.877	-230.797	-231.895		0.000392544	-0.11842	-0.0594064	-0.0594064
2.52128	24_Benzene-Benzene_pi-pi_1.00_dimer.out	-461.554	-463.64	-461.581	-463.758	-461.586	-463.794	-230.781	-231.818	-230.794	-231.877	-230.797	-231.895	-230.781	-231.818	-230.794	-231.877	-230.797	-231.895	-230.781	-231.818	-230.794	-231.877	-230.797	-231.895	-230.781	-231.818	-230.794	-231.877	-230.797	-231.895		0.000459638	-0.118353	-0.0594064	-0.0594064
2.63293	24_Benzene-Benzene_pi-pi_1.05_dimer.out	-461.557	-463.64	-461.583	-463.759	-461.589	-463.794	-230.781	-231.818	-230.794	-231.877	-230.797	-231.895	-230.781	-231.818	-230.794	-231.877	-230.797	-231.895	-230.781	-231.818	-230.794	-231.877	-230.797	-231.895	-230.781	-231.818	-230.794	-231.877	-230.797	-231.895		0.000494314	-0.118318	-0.0594064	-0.0594064
2.44969	24_Benzene-Benzene_pi-pi_1.10_dimer.out	-461.559	-463.64	-461.585	-463.758	-461.591	-463.794	-230.781	-231.818	-230.794	-231.877	-230.797	-231.895	-230.781	-231.818	-230.794	-231.877	-230.797	-231.895	-230.781	-231.818	-230.794	-231.877	-230.797	-231.895	-230.781	-231.818	-230.794	-231.877	-230.797	-231.895		0.000465717	-0.118347	-0.0594064	-0.0594064
1.47949	24_Benzene-Benzene_pi-pi_1.25_dimer.out	-461.561	-463.638	-461.588	-463.757	-461.593	-463.792	-230.781	-231.818	-230.794	-231.877	-230.797	-231.895	-230.781	-231.818	-230.794	-231.877	-230.797	-231.895	-230.781	-231.818	-230.794	-231.877	-230.797	-231.895	-230.781	-231.818	-230.794	-231.877	-230.797	-231.895		0.000322918	-0.11849	-0.0594064	-0.0594064
0.468184	24_Benzene-Benzene_pi-pi_1.50_dimer.out	-461.562	-463.637	-461.588	-463.755	-461.594	-463.79	-230.781	-231.818	-230.794	-231.877	-230.797	-231.895	-230.781	-231.818	-230.794	-231.877	-230.797	-231.895	-230.781	-231.818	-230.794	-231.877	-230.797	-231.895	-230.781	-231.818	-230.794	-231.877	-230.797	-231.895		0.000125373	-0.118687	-0.0594064	-0.0594064
0.0586454	24_Benzene-Benzene_pi-pi_2.00_dimer.out	-461.562	-463.636	-461.589	-463.755	-461.594	-463.79	-230.781	-231.818	-230.794	-231.877	-230.797	-231.895	-230.781	-231.818	-230.794	-231.877	-230.797	-231.895	-230.781	-231.818	-230.794	-231.877	-230.797	-231.895	-230.781	-231.818	-230.794	-231.877	-230.797	-231.895		5.69897e-05	-0.118756	-0.0594064	-0.0594064
0.964221	25_Pyridine-Pyridine_pi-pi_0.90_dimer.out	-493.537	-495.694	-493.566	-495.82	-493.572	-495.858	-246.778	-247.847	-246.793	-247.909	-246.796	-247.928	-246.778	-247.847	-246.793	-247.909	-246.796	-247.928	-246.779	-247.847	-246.793	-247.909	-246.796	-247.928	-246.779	-247.847	-246.793	-247.909	-246.796	-247.928		0.000180898	-0.125464	-0.0628224	-0.0628229
2.89122	25_Pyridine-Pyridine_pi-pi_0.95_dimer.out	-493.545	-495.698	-493.574	-495.823	-493.58	-495.861	-246.778	-247.847	-246.793	-247.909	-246.796	-247.928	-246.778	-247.847	-246.793	-247.909	-246.796	-247.928	-246.779	-247.847	-246.793	-247.909	-246.796	-247.928	-246.779	-247.847	-246.793	-247.909	-246.796	-247.928		0.000294577	-0.125351	-0.0628224	-0.0628229
3.61049	25_Pyridine-Pyridine_pi-pi_1.00_dimer.out	-493.55	-495.699	-493.578	-495.824	-493.585	-495.862	-246.778	-247.847	-246.793	-247.909	-246.796	-247.928	-246.778	-247.847	-246.793	-247.909	-246.796	-247.928	-246.779	-247.847	-246.793	-247.909	-246.796	-247.928	-246.779	-247.847	-246.793	-247.909	-246.796	-247.928		0.000399478	-0.125246	-0.0628224	-0.0628229
3.68858	25_Pyridine-Pyridine_pi-pi_1.05_dimer.out	-493.553	-495.699	-493.581	-495.824	-493.587	-495.862	-246.778	-247.847	-246.793	-247.909	-246.796	-247.928	-246.778	-247.847	-246.793	-247.909	-246.796	-247.928	-246.779	-247.847	-246.793	-247.909	-246.796	-247.928	-246.779	-247.847	-246.793	-247.909	-246.796	-247.928		0.00042224	-0.125223	-0.0628224	-0.0628229
3.45182	25_Pyridine-Pyridine_pi-pi_1.10_dimer.out	-493.555	-495.699	-493.583	-495.824	-493.589	-495.862	-246.778	-247.847	-246.793	-247.909	-246.796	-247.928	-246.778	-247.847	-246.793	-247.909	-246.796	-247.928	-246.779	-247.847	-246.793	-247.909	-246.796	-247.928	-246.779	-247.847	-246.793	-247.909	-246.796	-247.928		0.000415382	-0.12523	-0.0628224	-0.0628229
2.29922	25_Pyridine-Pyridine_pi-pi_1.25_dimer.out	-493.557	-495.697	-493.585	-495.822	-493.591	-495.86	-246.778	-247.847	-246.793	-247.909	-246.796	-247.928	-246.778	-247.847	-246.793	-247.909	-246.796	-247.928	-246.779	-247.847	-246.793	-247.909	-246.796	-247.928	-246.779	-247.847	-246.793	-247.909	-246.796	-247.928		0.000298332	-0.125347	-0.0628224	-0.0628229
0.945317	25_Pyridine-Pyridine_pi-pi_1.50_dimer.out	-493.557	-495.695	-493.586	-495.82	-493.592	-495.858	-246.778	-247.847	-246.793	-247.909	-246.796	-247.928	-246.778	-247.847	-246.793	-247.909	-246.796	-247.928	-246.778	-247.847	-246.793	-247.909	-246.796	-247.928	-246.778	-247.847	-246.793	-247.909	-246.796	-247.928		0.000110092	-0.125535	-0.0628224	-0.0628229
0.233435	25_Pyridine-Pyridine_pi-pi_2.00_dimer.out	-493.557	-495.693	-493.586	-495.819	-493.592	-495.857	-246.778	-247.847	-246.793	-247.909	-246.796	-247.928	-246.778	-247.847	-246.793	-247.909	-246.796	-247.928	-246.778	-247.847	-246.793	-247.909	-246.796	-247.928	-246.778	-247.847	-246.793	-247.909	-246.796	-247.928		4.31432e-05	-0.125602	-0.0628224	-0.0628229
7.5928	26_Uracil-Uracil_pi-pi_0.90_dimer.out	-825.236	-828.421	-825.287	-828.636	-825.298	-828.703	-412.623	-414.204	-412.649	-414.312	-412.655	-414.346	-412.623	-414.204	-412.649	-414.312	-412.655	-414.346	-412.624	-414.205	-412.649	-414.313	-412.655	-414.346	-412.624	-414.205	-412.649	-414.313	-412.655	-414.346		0.000488732	-0.215515	-0.108002	-0.108002
9.26565	26_Uracil-Uracil_pi-pi_0.95_dimer.out	-825.243	-828.424	-825.294	-828.639	-825.305	-828.706	-412.623	-414.204	-412.649	-414.312	-412.655	-414.346	-412.623	-414.204	-412.649	-414.312	-412.655	-414.346	-412.624	-414.205	-412.649	-414.313	-412.655	-414.346	-412.624	-414.205	-412.649	-414.313	-412.655	-414.346		0.000559844	-0.215444	-0.108002	-0.108002
9.61943	26_Uracil-Uracil_pi-pi_1.00_dimer.out	-825.248	-828.424	-825.299	-828.64	-825.309	-828.707	-412.623	-414.204	-412.649	-414.312	-412.655	-414.346	-412.623	-414.204	-412.649	-414.312	-412.655	-414.346	-412.624	-414.205	-412.649	-414.312	-412.655	-414.346	-412.624	-414.205	-412.649	-414.312	-412.655	-414.346		0.000567636	-0.215436	-0.108002	-0.108002
9.25628	26_Uracil-Uracil_pi-pi_1.05_dimer.out	-825.25	-828.424	-825.301	-828.639	-825.312	-828.706	-412.623	-414.204	-412.649	-414.312	-412.655	-414.346	-412.623	-414.204	-412.649	-414.312	-412.655	-414.346	-412.624	-414.205	-412.649	-414.312	-412.655	-414.346	-412.624	-414.205	-412.649	-414.312	-412.655	-414.346		0.000605595	-0.215398	-0.108002	-0.108002
8.54106	26_Uracil-Uracil_pi-pi_1.10_dimer.out	-825.251	-828.423	-825.302	-828.638	-825.313	-828.705	-412.623	-414.204	-412.649	-414.312	-412.655	-414.346	-412.623	-414.204	-412.649	-414.312	-412.655	-414.346	-412.624	-414.205	-412.649	-414.312	-412.655	-414.346	-412.624	-414.205	-412.649	-414.312	-412.655	-414.346		0.000599107	-0.215404	-0.108002	-0.108002
5.99344	26_Uracil-Uracil_pi-pi_1.25_dimer.out	-825.252	-828.419	-825.303	-828.634	-825.314	-828.701	-412.623	-414.204	-412.649	-414.312	-412.655	-414.346	-412.623	-414.204	-412.649	-414.312	-412.655	-414.346	-412.624	-414.205	-412.649	-414.312	-412.655	-414.346	-412.624	-414.205	-412.649	-414.312	-412.655	-414.346		0.000526383	-0.215477	-0.108002	-0.108002
3.07071	26_Uracil-Uracil_pi-pi_1.50_dimer.out	-825.25	-828.414	-825.301	-828.63	-825.312	-828.697	-412.623	-414.204	-412.649	-414.312	-412.655	-414.346	-412.623	-414.204	-412.649	-414.312	-412.655	-414.346	-412.624	-414.205	-412.649	-414.312	-412.655	-414.346	-412.624	-414.205	-412.649	-414.312	-412.655	-414.346		0.000266226	-0.215737	-0.108002	-0.108002
0.986244	26_Uracil-Uracil_pi-pi_2.00_dimer.out	-825.248	-828.41	-825.3	-828.626	-825.311	-828.693	-412.623	-414.204	-412.649	-414.312	-412.655	-414.346	-412.623	-414.204	-412.649	-414.312	-412.655	-414.346	-412.624	-414.204	-412.649	-414.312	-412.655	-414.346	-412.624	-414.204	-412.649	-414.312	-412.655	-414.346		4.89965e-05	-0.215954	-0.108002	-0.108002
0.362257	27_Benzene-Pyridine_pi-pi_0.90_dimer.out	-477.539	-479.665	-477.566	-479.787	-477.572	-479.823	-230.781	-231.818	-230.794	-231.877	-230.797	-231.895	-246.778	-247.847	-246.793	-247.909	-246.796	-247.928	-246.779	-247.847	-246.793	-247.909	-246.796	-247.928	-230.781	-231.819	-230.794	-231.877	-230.797	-231.895		0.000284923	-0.121944	-0.0593973	-0.0628321
2.41302	27_Benzene-Pyridine_pi-pi_0.95_dimer.out	-477.547	-479.668	-477.575	-479.79	-477.581	-479.827	-230.781	-231.818	-230.794	-231.877	-230.797	-231.895	-246.778	-247.847	-246.793	-247.909	-246.796	-247.928	-246.779	-247.847	-246.793	-247.909	-246.796	-247.928	-230.781	-231.818	-230.794	-231.877	-230.797	-231.895		0.000356238	-0.121873	-0.0593973	-0.0628321
3.15603	27_Benzene-Pyridine_pi-pi_1.00_dimer.out	-477.552	-479.67	-477.58	-479.792	-477.586	-479.828	-230.781	-231.818	-230.794	-231.877	-230.797	-231.895	-246.778	-247.847	-246.793	-247.909	-246.796	-247.928	-246.779	-247.847	-246.793	-247.909	-246.796	-247.928	-230.781	-231.818	-230.794	-231.877	-230.797	-231.895		0.000413504	-0.121816	-0.0593973	-0.0628321
3.23443	27_Benzene-Pyridine_pi-pi_1.05_dimer.out	-477.555	-479.67	-477.583	-479.792	-477.589	-479.828	-230.781	-231.818	-230.794	-231.877	-230.797	-231.895	-246.778	-247.847	-246.793	-247.909	-246.796	-247.928	-246.779	-247.847	-246.793	-247.909	-246.796	-247.928	-230.781	-231.818	-230.794	-231.877	-230.797	-231.895		0.000443381	-0.121786	-0.0593973	-0.0628321
3.00145	27_Benzene-Pyridine_pi-pi_1.10_dimer.out	-477.557	-479.67	-477.584	-479.791	-477.59	-479.828	-230.781	-231.818	-230.794	-231.877	-230.797	-231.895	-246.778	-247.847	-246.793	-247.909	-246.796	-247.928	-246.779	-247.847	-246.793	-247.909	-246.796	-247.928	-230.781	-231.818	-230.794	-231.877	-230.797	-231.895		0.000438858	-0.121791	-0.0593973	-0.0628321
1.91291	27_Benzene-Pyridine_pi-pi_1.25_dimer.out	-477.559	-479.668	-477.587	-479.79	-477.592	-479.826	-230.781	-231.818	-230.794	-231.877	-230.797	-231.895	-246.778	-247.847	-246.793	-247.909	-246.796	-247.928	-246.779	-247.847	-246.793	-247.909	-246.796	-247.928	-230.781	-231.818	-230.794	-231.877	-230.797	-231.895		0.000316935	-0.121912	-0.0593973	-0.0628321
0.705302	27_Benzene-Pyridine_pi-pi_1.50_dimer.out	-477.56	-479.666	-477.587	-479.788	-477.593	-479.824	-230.781	-231.818	-230.794	-231.877	-230.797	-231.895	-246.778	-247.847	-246.793	-247.909	-246.796	-247.928	-246.779	-247.847	-246.793	-247.909	-246.796	-247.928	-230.781	-231.818	-230.794	-231.877	-230.797	-231.895		0.000121094	-0.122108	-0.0593973	-0.0628321
0.143097	27_Benzene-Pyridine_pi-pi_2.00_dimer.out	-477.56	-479.665	-477.587	-479.787	-477.593	-479.823	-230.781	-231.818	-230.794	-231.877	-230.797	-231.895	-246.778	-247.847	-246.793	-247.909	-246.796	-247.928	-246.778	-247.847	-246.793	-247.909	-246.796	-247.928	-230.781	-231.818	-230.794	-231.877	-230.797	-231.895		5.19844e-05	-0.122177	-0.0593973	-0.0628321
3.17801	28_Benzene-Uracil_pi-pi_0.90_dimer.out	-643.387	-646.028	-643.426	-646.195	-643.434	-646.246	-230.781	-231.818	-230.794	-231.877	-230.797	-231.895	-412.624	-414.205	-412.65	-414.313	-412.656	-414.346	-412.625	-414.206	-412.65	-414.313	-412.656	-414.346	-230.781	-231.819	-230.794	-231.877	-230.797	-231.895		0.000573825	-0.166854	-0.059388	-0.10804
4.92446	28_Benzene-Uracil_pi-pi_0.95_dimer.out	-643.395	-646.031	-643.434	-646.198	-643.442	-646.249	-230.781	-231.818	-230.794	-231.877	-230.797	-231.895	-412.624	-414.205	-412.65	-414.313	-412.656	-414.346	-412.625	-414.205	-412.65	-414.313	-412.656	-414.346	-230.781	-231.819	-230.794	-231.877	-230.797	-231.895		0.000606638	-0.166821	-0.059388	-0.10804
5.46473	28_Benzene-Uracil_pi-pi_1.00_dimer.out	-643.4	-646.032	-643.438	-646.199	-643.447	-646.25	-230.781	-231.818	-230.794	-231.877	-230.797	-231.895	-412.624	-414.205	-412.65	-414.313	-412.656	-414.346	-412.625	-414.205	-412.65	-414.313	-412.656	-414.346	-230.781	-231.819	-230.794	-231.877	-230.797	-231.895		0.000619423	-0.166808	-0.059388	-0.10804
5.35136	28_Benzene-Uracil_pi-pi_1.05_dimer.out	-643.403	-646.032	-643.441	-646.198	-643.45	-646.25	-230.781	-231.818	-230.794	-231.877	-230.797	-231.895	-412.624	-414.205	-412.65	-414.313	-412.656	-414.346	-412.625	-414.205	-412.65	-414.313	-412.656	-414.346	-230.781	-231.819	-230.794	-231.877	-230.797	-231.895		0.000611152	-0.166817	-0.059388	-0.10804
4.91567	28_Benzene-Uracil_pi-pi_1.10_dimer.out	-643.404	-646.031	-643.443	-646.198	-643.451	-646.249	-230.781	-231.818	-230.794	-231.877	-230.797	-231.895	-412.624	-414.205	-412.65	-414.313	-412.656	-414.346	-412.624	-414.205	-412.65	-414.313	-412.656	-414.346	-230.781	-231.818	-230.794	-231.877	-230.797	-231.895		0.000596964	-0.166831	-0.059388	-0.10804
3.20726	28_Benzene-Uracil_pi-pi_1.25_dimer.out	-643.406	-646.028	-643.445	-646.195	-643.453	-646.246	-230.781	-231.818	-230.794	-231.877	-230.797	-231.895	-412.624	-414.205	-412.65	-414.313	-412.656	-414.346	-412.624	-414.205	-412.65	-414.313	-412.656	-414.346	-230.781	-231.818	-230.794	-231.877	-230.797	-231.895		0.0004887	-0.166939	-0.059388	-0.10804
1.33389	28_Benzene-Uracil_pi-pi_1.50_dimer.out	-643.406	-646.025	-643.445	-646.192	-643.453	-646.243	-230.781	-231.818	-230.794	-231.877	-230.797	-231.895	-412.624	-414.205	-412.65	-414.313	-412.656	-414.346	-412.624	-414.205	-412.65	-414.313	-412.656	-414.346	-230.781	-231.818	-230.794	-231.877	-230.797	-231.895		0.000231742	-0.167196	-0.059388	-0.10804
0.245855	28_Benzene-Uracil_pi-pi_2.00_dimer.out	-643.405	-646.023	-643.444	-646.191	-643.453	-646.242	-230.781	-231.818	-230.794	-231.877	-230.797	-231.895	-412.624	-414.205	-412.65	-414.313	-412.656	-414.346	-412.624	-414.205	-412.65	-414.313	-412.656	-414.346	-230.781	-231.818	-230.794	-231.877	-230.797	-231.895		6.5432e-05	-0.167362	-0.059388	-0.10804
3.37441	29_Pyridine-Uracil_pi-pi_0.90_dimer.out	-659.384	-662.056	-659.423	-662.227	-659.432	-662.279	-246.778	-247.847	-246.793	-247.909	-246.796	-247.928	-412.624	-414.205	-412.65	-414.313	-412.655	-414.346	-412.625	-414.206	-412.65	-414.313	-412.655	-414.346	-246.779	-247.847	-246.793	-247.909	-246.796	-247.928		0.000362503	-0.170483	-0.0628069	-0.108039
5.87827	29_Pyridine-Uracil_pi-pi_0.95_dimer.out	-659.394	-662.061	-659.433	-662.231	-659.442	-662.283	-246.778	-247.847	-246.793	-247.909	-246.796	-247.928	-412.624	-414.205	-412.65	-414.313	-412.655	-414.346	-412.624	-414.205	-412.65	-414.313	-412.655	-414.346	-246.779	-247.847	-246.793	-247.909	-246.796	-247.928		0.000437657	-0.170408	-0.0628069	-0.108039
6.5763	29_Pyridine-Uracil_pi-pi_1.00_dimer.out	-659.399	-662.062	-659.439	-662.232	-659.447	-662.285	-246.778	-247.847	-246.793	-247.909	-246.796	-247.928	-412.624	-414.205	-412.65	-414.313	-412.655	-414.346	-412.624	-414.205	-412.65	-414.313	-412.655	-414.346	-246.779	-247.847	-246.793	-247.909	-246.796	-247.928		0.000484425	-0.170361	-0.0628069	-0.108039
6.39132	29_Pyridine-Uracil_pi-pi_1.05_dimer.out	-659.402	-662.062	-659.442	-662.232	-659.45	-662.284	-246.778	-247.847	-246.793	-247.909	-246.796	-247.928	-412.624	-414.205	-412.65	-414.313	-412.655	-414.346	-412.624	-414.205	-412.65	-414.313	-412.655	-414.346	-246.778	-247.847	-246.793	-247.909	-246.796	-247.928		0.000501435	-0.170344	-0.0628069	-0.108039
5.82038	29_Pyridine-Uracil_pi-pi_1.10_dimer.out	-659.404	-662.061	-659.444	-662.231	-659.452	-662.284	-246.778	-247.847	-246.793	-247.909	-246.796	-247.928	-412.624	-414.205	-412.65	-414.313	-412.655	-414.346	-412.624	-414.205	-412.65	-414.313	-412.655	-414.346	-246.778	-247.847	-246.793	-247.909	-246.796	-247.928		0.000487541	-0.170358	-0.0628069	-0.108039
3.79308	29_Pyridine-Uracil_pi-pi_1.25_dimer.out	-659.405	-662.058	-659.445	-662.228	-659.453	-662.28	-246.778	-247.847	-246.793	-247.909	-246.796	-247.928	-412.624	-414.205	-412.65	-414.313	-412.655	-414.346	-412.624	-414.205	-412.65	-414.313	-412.655	-414.346	-246.778	-247.847	-246.793	-247.909	-246.796	-247.928		0.000410077	-0.170436	-0.0628069	-0.108039
1.75215	29_Pyridine-Uracil_pi-pi_1.50_dimer.out	-659.404	-662.054	-659.444	-662.225	-659.453	-662.277	-246.778	-247.847	-246.793	-247.909	-246.796	-247.928	-412.624	-414.205	-412.65	-414.313	-412.655	-414.346	-412.624	-414.205	-412.65	-414.313	-412.655	-414.346	-246.778	-247.847	-246.793	-247.909	-246.796	-247.928		0.000176252	-0.17067	-0.0628069	-0.108039
0.528589	29_Pyridine-Uracil_pi-pi_2.00_dimer.out	-659.403	-662.052	-659.443	-662.223	-659.452	-662.275	-246.778	-247.847	-246.793	-247.909	-246.796	-247.928	-412.624	-414.205	-412.65	-414.313	-412.655	-414.346	-412.624	-414.205	-412.65	-414.313	-412.655	-414.346	-246.778	-247.847	-246.793	-247.909	-246.796	-247.928		5.0921e-05	-0.170795	-0.0628069	-0.108039
0.021002	30_Benzene-Ethene_0.90_dimer.out	-308.834	-310.261	-308.852	-310.341	-308.856	-310.364	-230.781	-231.818	-230.794	-231.877	-230.797	-231.895	-78.0646	-78.4427	-78.0694	-78.4636	-78.0705	-78.4696	-78.0647	-78.4429	-78.0695	-78.4636	-78.0705	-78.4696	-230.781	-231.818	-230.794	-231.877	-230.797	-231.895		5.98569e-05	-0.0802196	-0.0594166	-0.0208629
0.939473	30_Benzene-Ethene_0.95_dimer.out	-308.838	-310.262	-308.856	-310.342	-308.86	-310.366	-230.781	-231.818	-230.794	-231.877	-230.797	-231.895	-78.0646	-78.4427	-78.0694	-78.4636	-78.0705	-78.4696	-78.0647	-78.4429	-78.0694	-78.4636	-78.0705	-78.4696	-230.781	-231.818	-230.794	-231.877	-230.797	-231.895		9.55628e-05	-0.0801839	-0.0594166	-0.0208629
1.26853	30_Benzene-Ethene_1.00_dimer.out	-308.841	-310.263	-308.859	-310.343	-308.863	-310.366	-230.781	-231.818	-230.794	-231.877	-230.797	-231.895	-78.0646	-78.4427	-78.0694	-78.4636	-78.0705	-78.4696	-78.0646	-78.4429	-78.0694	-78.4636	-78.0705	-78.4696	-230.781	-231.818	-230.794	-231.877	-230.797	-231.895		0.000185365	-0.0800941	-0.0594166	-0.0208629
1.29209	30_Benzene-Ethene_1.05_dimer.out	-308.842	-310.263	-308.86	-310.343	-308.864	-310.367	-230.781	-231.818	-230.794	-231.877	-230.797	-231.895	-78.0646	-78.4427	-78.0694	-78.4636	-78.0705	-78.4696	-78.0646	-78.4429	-78.0694	-78.4636	-78.0705	-78.4696	-230.781	-231.818	-230.794	-231.877	-230.797	-231.895		0.000237907	-0.0800416	-0.0594166	-0.0208629
1.17227	30_Benzene-Ethene_1.10_dimer.out	-308.843	-310.263	-308.861	-310.343	-308.865	-310.366	-230.781	-231.818	-230.794	-231.877	-230.797	-231.895	-78.0646	-78.4427	-78.0694	-78.4636	-78.0705	-78.4696	-78.0646	-78.4428	-78.0694	-78.4636	-78.0705	-78.4696	-230.781	-231.818	-230.794	-231.877	-230.797	-231.895		0.000230131	-0.0800494	-0.0594166	-0.0208629
0.650899	30_Benzene-Ethene_1.25_dimer.out	-308.845	-310.262	-308.863	-310.342	-308.867	-310.366	-230.781	-231.818	-230.794	-231.877	-230.797	-231.895	-78.0646	-78.4427	-78.0694	-78.4636	-78.0705	-78.4696	-78.0646	-78.4428	-78.0694	-78.4636	-78.0705	-78.4696	-230.781	-231.818	-230.794	-231.877	-230.797	-231.895		0.000107897	-0.0801716	-0.0594166	-0.0208629
0.159214	30_Benzene-Ethene_1.50_dimer.out	-308.845	-310.261	-308.863	-310.341	-308.867	-310.365	-230.781	-231.818	-230.794	-231.877	-230.797	-231.895	-78.0646	-78.4427	-78.0694	-78.4636	-78.0705	-78.4696	-78.0646	-78.4427	-78.0694	-78.4636	-78.0705	-78.4696	-230.781	-231.818	-230.794	-231.877	-230.797	-231.895		3.71556e-05	-0.0802423	-0.0594166	-0.0208629
-0.0132824	30_Benzene-Ethene_2.00_dimer.out	-308.845	-310.261	-308.864	-310.341	-308.868	-310.364	-230.781	-231.818	-230.794	-231.877	-230.797	-231.895	-78.0646	-78.4427	-78.0694	-78.4636	-78.0705	-78.4696	-78.0646	-78.4427	-78.0694	-78.4636	-78.0705	-78.4696	-230.781	-231.818	-230.794	-231.877	-230.797	-231.895		2.87981e-05	-0.0802507	-0.0594166	-0.0208629
2.39596	31_Uracil-Ethene_0.90_dimer.out	-490.681	-492.651	-490.712	-492.78	-490.718	-492.82	-412.624	-414.205	-412.65	-414.313	-412.656	-414.346	-78.0645	-78.4427	-78.0693	-78.4636	-78.0705	-78.4696	-78.0646	-78.443	-78.0694	-78.4636	-78.0705	-78.4697	-412.624	-414.205	-412.65	-414.313	-412.656	-414.346		8.81052e-05	-0.128802	-0.108041	-0.020849
3.09153	31_Uracil-Ethene_0.95_dimer.out	-490.685	-492.652	-490.715	-492.781	-490.722	-492.821	-412.624	-414.205	-412.65	-414.313	-412.656	-414.346	-78.0645	-78.4427	-78.0693	-78.4636	-78.0705	-78.4696	-78.0646	-78.443	-78.0694	-78.4636	-78.0705	-78.4697	-412.624	-414.205	-412.65	-414.313	-412.656	-414.346		0.000122633	-0.128768	-0.108041	-0.020849
3.25698	31_Uracil-Ethene_1.00_dimer.out	-490.687	-492.653	-490.717	-492.781	-490.724	-492.821	-412.624	-414.205	-412.65	-414.313	-412.656	-414.346	-78.0645	-78.4427	-78.0693	-78.4636	-78.0705	-78.4696	-78.0646	-78.4429	-78.0694	-78.4636	-78.0705	-78.4697	-412.624	-414.205	-412.65	-414.313	-412.656	-414.346		0.000157515	-0.128733	-0.108041	-0.020849
3.13698	31_Uracil-Ethene_1.05_dimer.out	-490.688	-492.653	-490.719	-492.781	-490.725	-492.821	-412.624	-414.205	-412.65	-414.313	-412.656	-414.346	-78.0645	-78.4427	-78.0693	-78.4636	-78.0705	-78.4696	-78.0646	-78.4429	-78.0694	-78.4636	-78.0705	-78.4697	-412.624	-414.205	-412.65	-414.313	-412.656	-414.346		0.00016752	-0.128723	-0.108041	-0.020849
2.87826	31_Uracil-Ethene_1.10_dimer.out	-490.689	-492.652	-490.72	-492.781	-490.726	-492.821	-412.624	-414.205	-412.65	-414.313	-412.656	-414.346	-78.0645	-78.4427	-78.0693	-78.4636	-78.0705	-78.4696	-78.0646	-78.4429	-78.0694	-78.4636	-78.0705	-78.4697	-412.624	-414.205	-412.65	-414.313	-412.656	-414.346		0.000172127	-0.128718	-0.108041	-0.020849
1.94883	31_Uracil-Ethene_1.25_dimer.out	-490.69	-492.651	-490.72	-492.779	-490.727	-492.819	-412.624	-414.205	-412.65	-414.313	-412.656	-414.346	-78.0645	-78.4427	-78.0693	-78.4636	-78.0705	-78.4696	-78.0645	-78.4429	-78.0694	-78.4636	-78.0705	-78.4697	-412.624	-414.205	-412.65	-414.313	-412.656	-414.346		0.000158317	-0.128732	-0.108041	-0.020849
0.917883	31_Uracil-Ethene_1.50_dimer.out	-490.69	-492.649	-490.72	-492.778	-490.727	-492.817	-412.624	-414.205	-412.65	-414.313	-412.656	-414.346	-78.0645	-78.4427	-78.0693	-78.4636	-78.0705	-78.4696	-78.0645	-78.4428	-78.0694	-78.4636	-78.0705	-78.4697	-412.624	-414.205	-412.65	-414.313	-412.656	-414.346		6.70217e-05	-0.128823	-0.108041	-0.020849
0.250618	31_Uracil-Ethene_2.00_dimer.out	-490.689	-492.648	-490.72	-492.777	-490.726	-492.816	-412.624	-414.205	-412.65	-414.313	-412.656	-414.346	-78.0645	-78.4427	-78.0693	-78.4636	-78.0705	-78.4696	-78.0645	-78.4427	-78.0693	-78.4636	-78.0705	-78.4696	-412.624	-414.205	-412.65	-414.313	-412.656	-414.346		1.44195e-05	-0.128876	-0.108041	-0.020849
2.58661	32_Uracil-Ethyne_0.90_dimer.out	-489.467	-491.4	-489.497	-491.528	-489.504	-491.567	-412.624	-414.205	-412.65	-414.313	-412.656	-414.346	-76.8487	-77.1915	-76.8533	-77.2111	-76.8543	-77.2167	-76.8489	-77.1919	-76.8534	-77.2111	-76.8543	-77.2167	-412.624	-414.205	-412.65	-414.313	-412.656	-414.346		0.000148174	-0.127438	-0.108038	-0.0195484
3.38713	32_Uracil-Ethyne_0.95_dimer.out	-489.471	-491.402	-489.501	-491.529	-489.507	-491.568	-412.624	-414.205	-412.65	-414.313	-412.656	-414.346	-76.8487	-77.1915	-76.8533	-77.2111	-76.8543	-77.2167	-76.8489	-77.1918	-76.8533	-77.2111	-76.8543	-77.2167	-412.624	-414.205	-412.65	-414.313	-412.656	-414.346		0.000168246	-0.127418	-0.108038	-0.0195484
3.58724	32_Uracil-Ethyne_1.00_dimer.out	-489.473	-491.402	-489.503	-491.529	-489.509	-491.569	-412.624	-414.205	-412.65	-414.313	-412.656	-414.346	-76.8487	-77.1915	-76.8533	-77.2111	-76.8543	-77.2167	-76.8489	-77.1918	-76.8533	-77.2111	-76.8543	-77.2167	-412.624	-414.205	-412.65	-414.313	-412.656	-414.346		0.000188743	-0.127398	-0.108038	-0.0195484
3.46393	32_Uracil-Ethyne_1.05_dimer.out	-489.474	-491.402	-489.504	-491.529	-489.511	-491.569	-412.624	-414.205	-412.65	-414.313	-412.656	-414.346	-76.8487	-77.1915	-76.8533	-77.2111	-76.8543	-77.2167	-76.8488	-77.1918	-76.8533	-77.2111	-76.8543	-77.2167	-412.624	-414.205	-412.65	-414.313	-412.656	-414.346		0.000191374	-0.127395	-0.108038	-0.0195484
3.18288	32_Uracil-Ethyne_1.10_dimer.out	-489.474	-491.401	-489.505	-491.529	-489.511	-491.568	-412.624	-414.205	-412.65	-414.313	-412.656	-414.346	-76.8487	-77.1915	-76.8533	-77.2111	-76.8543	-77.2167	-76.8488	-77.1917	-76.8533	-77.2111	-76.8543	-77.2167	-412.624	-414.205	-412.65	-414.313	-412.656	-414.346		0.00018916	-0.127397	-0.108038	-0.0195484
2.15864	32_Uracil-Ethyne_1.25_dimer.out	-489.475	-491.4	-489.505	-491.527	-489.511	-491.566	-412.624	-414.205	-412.65	-414.313	-412.656	-414.346	-76.8487	-77.1915	-76.8533	-77.2111	-76.8543	-77.2167	-76.8488	-77.1916	-76.8533	-77.2111	-76.8543	-77.2167	-412.624	-414.205	-412.65	-414.313	-412.656	-414.346		0.000141845	-0.127445	-0.108038	-0.0195484
1.01222	32_Uracil-Ethyne_1.50_dimer.out	-489.474	-491.398	-489.504	-491.525	-489.511	-491.565	-412.624	-414.205	-412.65	-414.313	-412.656	-414.346	-76.8487	-77.1915	-76.8533	-77.2111	-76.8543	-77.2167	-76.8488	-77.1916	-76.8533	-77.2111	-76.8543	-77.2167	-412.624	-414.205	-412.65	-414.313	-412.656	-414.346		8.4486e-05	-0.127502	-0.108038	-0.0195484
0.264394	32_Uracil-Ethyne_2.00_dimer.out	-489.473	-491.397	-489.504	-491.524	-489.51	-491.563	-412.624	-414.205	-412.65	-414.313	-412.656	-414.346	-76.8487	-77.1915	-76.8533	-77.2111	-76.8543	-77.2167	-76.8487	-77.1915	-76.8533	-77.2111	-76.8543	-77.2167	-412.624	-414.205	-412.65	-414.313	-412.656	-414.346		2.45473e-05	-0.127562	-0.108038	-0.0195484
0.667746	33_Pyridine-Ethene_0.90_dimer.out	-324.832	-326.29	-324.851	-326.374	-324.855	-326.399	-246.779	-247.847	-246.793	-247.909	-246.796	-247.928	-78.0645	-78.4427	-78.0694	-78.4636	-78.0705	-78.4696	-78.0646	-78.443	-78.0694	-78.4636	-78.0705	-78.4697	-246.779	-247.847	-246.793	-247.909	-246.796	-247.928		4.72693e-05	-0.0836562	-0.0628439	-0.0208596
1.447	33_Pyridine-Ethene_0.95_dimer.out	-324.836	-326.292	-324.855	-326.375	-324.859	-326.4	-246.779	-247.847	-246.793	-247.909	-246.796	-247.928	-78.0645	-78.4427	-78.0694	-78.4636	-78.0705	-78.4696	-78.0646	-78.4429	-78.0694	-78.4636	-78.0705	-78.4697	-246.779	-247.847	-246.793	-247.909	-246.796	-247.928		0.000117163	-0.0835863	-0.0628439	-0.0208596
1.72072	33_Pyridine-Ethene_1.00_dimer.out	-324.838	-326.292	-324.858	-326.376	-324.862	-326.401	-246.779	-247.847	-246.793	-247.909	-246.796	-247.928	-78.0645	-78.4427	-78.0694	-78.4636	-78.0705	-78.4696	-78.0646	-78.4429	-78.0694	-78.4636	-78.0705	-78.4696	-246.779	-247.847	-246.793	-247.909	-246.796	-247.928		0.000175541	-0.083528	-0.0628439	-0.0208596
1.71932	33_Pyridine-Ethene_1.05_dimer.out	-324.84	-326.292	-324.859	-326.376	-324.863	-326.401	-246.779	-247.847	-246.793	-247.909	-246.796	-247.928	-78.0645	-78.4427	-78.0694	-78.4636	-78.0705	-78.4696	-78.0646	-78.4429	-78.0694	-78.4636	-78.0705	-78.4696	-246.779	-247.847	-246.793	-247.909	-246.796	-247.928		0.000202854	-0.0835006	-0.0628439	-0.0208596
1.58095	33_Pyridine-Ethene_1.10_dimer.out	-324.841	-326.292	-324.86	-326.375	-324.864	-326.4	-246.779	-247.847	-246.793	-247.909	-246.796	-247.928	-78.0645	-78.4427	-78.0694	-78.4636	-78.0705	-78.4696	-78.0646	-78.4429	-78.0694	-78.4636	-78.0705	-78.4696	-246.779	-247.847	-246.793	-247.909	-246.796	-247.928		0.000196508	-0.083507	-0.0628439	-0.0208596
0.984842	33_Pyridine-Ethene_1.25_dimer.out	-324.842	-326.291	-324.861	-326.374	-324.866	-326.399	-246.779	-247.847	-246.793	-247.909	-246.796	-247.928	-78.0645	-78.4427	-78.0694	-78.4636	-78.0705	-78.4696	-78.0646	-78.4428	-78.0694	-78.4636	-78.0705	-78.4696	-246.779	-247.847	-246.793	-247.909	-246.796	-247.928		0.000132536	-0.083571	-0.0628439	-0.0208596
0.350189	33_Pyridine-Ethene_1.50_dimer.out	-324.843	-326.29	-324.862	-326.373	-324.866	-326.398	-246.779	-247.847	-246.793	-247.909	-246.796	-247.928	-78.0645	-78.4427	-78.0694	-78.4636	-78.0705	-78.4696	-78.0645	-78.4427	-78.0694	-78.4636	-78.0705	-78.4696	-246.779	-247.847	-246.793	-247.909	-246.796	-247.928		5.85057e-05	-0.083645	-0.0628439	-0.0208596
0.0416423	33_Pyridine-Ethene_2.00_dimer.out	-324.843	-326.289	-324.862	-326.373	-324.866	-326.398	-246.779	-247.847	-246.793	-247.909	-246.796	-247.928	-78.0645	-78.4427	-78.0694	-78.4636	-78.0705	-78.4696	-78.0645	-78.4427	-78.0694	-78.4636	-78.0705	-78.4696	-246.779	-247.847	-246.793	-247.909	-246.796	-247.928		2.12064e-05	-0.0836823	-0.0628439	-0.0208596
2.7964	34_Pentane-Pentane_0.90_dimer.out	-392.796	-394.811	-392.82	-394.918	-392.825	-394.95	-196.404	-197.404	-196.416	-197.457	-196.419	-197.473	-196.404	-197.404	-196.416	-197.457	-196.419	-197.473	-196.404	-197.404	-196.416	-197.457	-196.419	-197.473	-196.404	-197.404	-196.416	-197.457	-196.419	-197.473		-0.000265597	-0.107292	-0.0535132	-0.053513
3.56378	34_Pentane-Pentane_0.95_dimer.out	-392.8	-394.812	-392.824	-394.919	-392.83	-394.951	-196.404	-197.404	-196.416	-197.457	-196.419	-197.473	-196.404	-197.404	-196.416	-197.457	-196.419	-197.473	-196.404	-197.404	-196.416	-197.457	-196.419	-197.473	-196.404	-197.404	-196.416	-197.457	-196.419	-197.473		-0.000161158	-0.107187	-0.0535132	-0.053513
3.72259	34_Pentane-Pentane_1.00_dimer.out	-392.803	-394.813	-392.827	-394.92	-392.833	-394.952	-196.404	-197.404	-196.416	-197.457	-196.419	-197.473	-196.404	-197.404	-196.416	-197.457	-196.419	-197.473	-196.404	-197.404	-196.416	-197.457	-196.419	-197.473	-196.404	-197.404	-196.416	-197.457	-196.419	-197.473		-0.000124491	-0.107151	-0.0535132	-0.053513
3.56736	34_Pentane-Pentane_1.05_dimer.out	-392.805	-394.812	-392.829	-394.92	-392.835	-394.951	-196.404	-197.404	-196.416	-197.457	-196.419	-197.473	-196.404	-197.404	-196.416	-197.457	-196.419	-197.473	-196.404	-197.404	-196.416	-197.457	-196.419	-197.473	-196.404	-197.404	-196.416	-197.457	-196.419	-197.473		-6.73858e-05	-0.107094	-0.0535132	-0.053513
3.26495	34_Pentane-Pentane_1.10_dimer.out	-392.806	-394.812	-392.83	-394.919	-392.836	-394.951	-196.404	-197.404	-196.416	-197.457	-196.419	-197.473	-196.404	-197.404	-196.416	-197.457	-196.419	-197.473	-196.404	-197.404	-196.416	-197.457	-196.419	-197.473	-196.404	-197.404	-196.416	-197.457	-196.419	-197.473		-4.72276e-05	-0.107073	-0.0535132	-0.053513
2.21088	34_Pentane-Pentane_1.25_dimer.out	-392.808	-394.81	-392.832	-394.917	-392.837	-394.949	-196.404	-197.404	-196.416	-197.457	-196.419	-197.473	-196.404	-197.404	-196.416	-197.457	-196.419	-197.473	-196.404	-197.404	-196.416	-197.457	-196.419	-197.473	-196.404	-197.404	-196.416	-197.457	-196.419	-197.473		1.7919e-06	-0.107024	-0.0535132	-0.053513
1.03869	34_Pentane-Pentane_1.50_dimer.out	-392.808	-394.809	-392.832	-394.916	-392.838	-394.947	-196.404	-197.404	-196.416	-197.457	-196.419	-197.473	-196.404	-197.404	-196.416	-197.457	-196.419	-197.473	-196.404	-197.404	-196.416	-197.457	-196.419	-197.473	-196.404	-197.404	-196.416	-197.457	-196.419	-197.473		3.39387e-06	-0.107023	-0.0535132	-0.053513
0.262657	34_Pentane-Pentane_2.00_dimer.out	-392.808	-394.807	-392.832	-394.914	-392.838	-394.946	-196.404	-197.404	-196.416	-197.457	-196.419	-197.473	-196.404	-197.404	-196.416	-197.457	-196.419	-197.473	-196.404	-197.404	-196.416	-197.457	-196.419	-197.473	-196.404	-197.404	-196.416	-197.457	-196.419	-197.473		-4.21923e-06	-0.10703	-0.0535132	-0.053513
1.82214	35_Neopentane-Pentane_0.90_dimer.out	-392.799	-394.816	-392.823	-394.923	-392.829	-394.954	-196.404	-197.404	-196.416	-197.457	-196.419	-197.473	-196.404	-197.41	-196.416	-197.463	-196.419	-197.479	-196.404	-197.41	-196.416	-197.463	-196.419	-197.479	-196.404	-197.404	-196.416	-197.457	-196.419	-197.473		-0.000167484	-0.106807	-0.053512	-0.0531279
2.46012	35_Neopentane-Pentane_0.95_dimer.out	-392.803	-394.817	-392.827	-394.924	-392.833	-394.956	-196.404	-197.404	-196.416	-197.457	-196.419	-197.473	-196.404	-197.41	-196.416	-197.463	-196.419	-197.479	-196.404	-197.41	-196.416	-197.463	-196.419	-197.479	-196.404	-197.404	-196.416	-197.457	-196.419	-197.473		-0.000132845	-0.106773	-0.053512	-0.0531279
2.57959	35_Neopentane-Pentane_1.00_dimer.out	-392.805	-394.817	-392.829	-394.924	-392.835	-394.956	-196.404	-197.404	-196.416	-197.457	-196.419	-197.473	-196.404	-197.41	-196.416	-197.463	-196.419	-197.479	-196.404	-197.41	-196.416	-197.463	-196.419	-197.479	-196.404	-197.404	-196.416	-197.457	-196.419	-197.473		-7.88495e-05	-0.106719	-0.053512	-0.0531279
2.45554	35_Neopentane-Pentane_1.05_dimer.out	-392.806	-394.817	-392.83	-394.924	-392.836	-394.956	-196.404	-197.404	-196.416	-197.457	-196.419	-197.473	-196.404	-197.41	-196.416	-197.463	-196.419	-197.479	-196.404	-197.41	-196.416	-197.463	-196.419	-197.479	-196.404	-197.404	-196.416	-197.457	-196.419	-197.473		-6.31369e-05	-0.106703	-0.053512	-0.0531279
2.22804	35_Neopentane-Pentane_1.10_dimer.out	-392.807	-394.817	-392.831	-394.923	-392.837	-394.955	-196.404	-197.404	-196.416	-197.457	-196.419	-197.473	-196.404	-197.41	-196.416	-197.463	-196.419	-197.479	-196.404	-197.41	-196.416	-197.463	-196.419	-197.479	-196.404	-197.404	-196.416	-197.457	-196.419	-197.473		-3.89942e-05	-0.106679	-0.053512	-0.0531279
1.47908	35_Neopentane-Pentane_1.25_dimer.out	-392.808	-394.816	-392.832	-394.922	-392.838	-394.954	-196.404	-197.404	-196.416	-197.457	-196.419	-197.473	-196.404	-197.41	-196.416	-197.463	-196.419	-197.479	-196.404	-197.41	-196.416	-197.463	-196.419	-197.479	-196.404	-197.404	-196.416	-197.457	-196.419	-197.473		-3.45586e-06	-0.106643	-0.053512	-0.0531279
0.689927	35_Neopentane-Pentane_1.50_dimer.out	-392.808	-394.815	-392.832	-394.921	-392.838	-394.953	-196.404	-197.404	-196.416	-197.457	-196.419	-197.473	-196.404	-197.41	-196.416	-197.463	-196.419	-197.479	-196.404	-197.41	-196.416	-197.463	-196.419	-197.479	-196.404	-197.404	-196.416	-197.457	-196.419	-197.473		1.74762e-05	-0.106622	-0.053512	-0.0531279
0.184665	35_Neopentane-Pentane_2.00_dimer.out	-392.808	-394.814	-392.832	-394.92	-392.838	-394.952	-196.404	-197.404	-196.416	-197.457	-196.419	-197.473	-196.404	-197.41	-196.416	-197.463	-196.419	-197.479	-196.404	-197.41	-196.416	-197.463	-196.419	-197.479	-196.404	-197.404	-196.416	-197.457	-196.419	-197.473		4.1911e-07	-0.10664	-0.053512	-0.0531279
1.42522	36_Neopentane-Neopentane_0.90_dimer.out	-392.803	-394.822	-392.827	-394.928	-392.833	-394.96	-196.404	-197.41	-196.416	-197.463	-196.419	-197.479	-196.404	-197.41	-196.416	-197.463	-196.419	-197.479	-196.404	-197.41	-196.416	-197.463	-196.419	-197.479	-196.404	-197.41	-196.416	-197.463	-196.419	-197.479		-0.000133934	-0.106387	-0.0531264	-0.0531263
1.70454	36_Neopentane-Neopentane_0.95_dimer.out	-392.805	-394.822	-392.829	-394.929	-392.835	-394.96	-196.404	-197.41	-196.416	-197.463	-196.419	-197.479	-196.404	-197.41	-196.416	-197.463	-196.419	-197.479	-196.404	-197.41	-196.416	-197.463	-196.419	-197.479	-196.404	-197.41	-196.416	-197.463	-196.419	-197.479		-0.000105377	-0.106358	-0.0531264	-0.0531263
1.74209	36_Neopentane-Neopentane_1.00_dimer.out	-392.806	-394.822	-392.83	-394.929	-392.836	-394.96	-196.404	-197.41	-196.416	-197.463	-196.419	-197.479	-196.404	-197.41	-196.416	-197.463	-196.419	-197.479	-196.404	-197.41	-196.416	-197.463	-196.419	-197.479	-196.404	-197.41	-196.416	-197.463	-196.419	-197.479		-7.70767e-05	-0.10633	-0.0531264	-0.0531263
1.62466	36_Neopentane-Neopentane_1.05_dimer.out	-392.807	-394.822	-392.831	-394.929	-392.837	-394.96	-196.404	-197.41	-196.416	-197.463	-196.419	-197.479	-196.404	-197.41	-196.416	-197.463	-196.419	-197.479	-196.404	-197.41	-196.416	-197.463	-196.419	-197.479	-196.404	-197.41	-196.416	-197.463	-196.419	-197.479		-6.79509e-05	-0.106321	-0.0531264	-0.0531263
1.5021	36_Neopentane-Neopentane_1.10_dimer.out	-392.807	-394.822	-392.832	-394.928	-392.837	-394.96	-196.404	-197.41	-196.416	-197.463	-196.419	-197.479	-196.404	-197.41	-196.416	-197.463	-196.419	-197.479	-196.404	-197.41	-196.416	-197.463	-196.419	-197.479	-196.404	-197.41	-196.416	-197.463	-196.419	-197.479		-3.9442e-05	-0.106292	-0.0531264	-0.0531263
1.01832	36_Neopentane-Neopentane_1.25_dimer.out	-392.808	-394.821	-392.832	-394.928	-392.838	-394.959	-196.404	-197.41	-196.416	-197.463	-196.419	-197.479	-196.404	-197.41	-196.416	-197.463	-196.419	-197.479	-196.404	-197.41	-196.416	-197.463	-196.419	-197.479	-196.404	-197.41	-196.416	-197.463	-196.419	-197.479		3.85453e-06	-0.106249	-0.0531264	-0.0531263
0.497189	36_Neopentane-Neopentane_1.50_dimer.out	-392.808	-394.821	-392.833	-394.927	-392.838	-394.958	-196.404	-197.41	-196.416	-197.463	-196.419	-197.479	-196.404	-197.41	-196.416	-197.463	-196.419	-197.479	-196.404	-197.41	-196.416	-197.463	-196.419	-197.479	-196.404	-197.41	-196.416	-197.463	-196.419	-197.479		1.43708e-05	-0.106238	-0.0531264	-0.0531263
0.13246	36_Neopentane-Neopentane_2.00_dimer.out	-392.808	-394.82	-392.833	-394.926	-392.838	-394.958	-196.404	-197.41	-196.416	-197.463	-196.419	-197.479	-196.404	-197.41	-196.416	-197.463	-196.419	-197.479	-196.404	-197.41	-196.416	-197.463	-196.419	-197.479	-196.404	-197.41	-196.416	-197.463	-196.419	-197.479		1.19076e-06	-0.106251	-0.0531264	-0.0531263
1.57585	37_Cyclopentane-Neopentane_0.90_dimer.out	-391.625	-393.607	-391.648	-393.713	-391.654	-393.744	-195.23	-196.195	-195.242	-196.247	-195.244	-196.263	-196.404	-197.41	-196.416	-197.463	-196.419	-197.479	-196.404	-197.41	-196.416	-197.463	-196.419	-197.479	-195.23	-196.195	-195.242	-196.247	-195.244	-196.263		-8.73729e-05	-0.105628	-0.0524154	-0.0531252
2.21712	37_Cyclopentane-Neopentane_0.95_dimer.out	-391.628	-393.608	-391.652	-393.714	-391.658	-393.745	-195.23	-196.195	-195.242	-196.247	-195.244	-196.263	-196.404	-197.41	-196.416	-197.463	-196.419	-197.479	-196.404	-197.41	-196.416	-197.463	-196.419	-197.479	-195.23	-196.195	-195.242	-196.247	-195.244	-196.263		-4.88496e-05	-0.10559	-0.0524154	-0.0531252
2.37278	37_Cyclopentane-Neopentane_1.00_dimer.out	-391.63	-393.608	-391.654	-393.714	-391.66	-393.745	-195.23	-196.195	-195.242	-196.247	-195.244	-196.263	-196.404	-197.41	-196.416	-197.463	-196.419	-197.479	-196.404	-197.41	-196.416	-197.463	-196.419	-197.479	-195.23	-196.195	-195.242	-196.247	-195.244	-196.263		-1.89191e-05	-0.10556	-0.0524154	-0.0531252
2.29461	37_Cyclopentane-Neopentane_1.05_dimer.out	-391.632	-393.608	-391.656	-393.714	-391.661	-393.745	-195.23	-196.195	-195.242	-196.247	-195.244	-196.263	-196.404	-197.41	-196.416	-197.463	-196.419	-197.479	-196.404	-197.41	-196.416	-197.463	-196.419	-197.479	-195.23	-196.195	-195.242	-196.247	-195.244	-196.263		8.84841e-06	-0.105532	-0.0524154	-0.0531252
2.11081	37_Cyclopentane-Neopentane_1.10_dimer.out	-391.633	-393.608	-391.656	-393.714	-391.662	-393.745	-195.23	-196.195	-195.242	-196.247	-195.244	-196.263	-196.404	-197.41	-196.416	-197.463	-196.419	-197.479	-196.404	-197.41	-196.416	-197.463	-196.419	-197.479	-195.23	-196.195	-195.242	-196.247	-195.244	-196.263		1.2581e-05	-0.105528	-0.0524154	-0.0531252
1.44924	37_Cyclopentane-Neopentane_1.25_dimer.out	-391.634	-393.607	-391.658	-393.713	-391.663	-393.744	-195.23	-196.195	-195.242	-196.247	-195.244	-196.263	-196.404	-197.41	-196.416	-197.463	-196.419	-197.479	-196.404	-197.41	-196.416	-197.463	-196.419	-197.479	-195.23	-196.195	-195.242	-196.247	-195.244	-196.263		1.99976e-06	-0.105539	-0.0524154	-0.0531252
0.698891	37_Cyclopentane-Neopentane_1.50_dimer.out	-391.634	-393.606	-391.658	-393.711	-391.663	-393.743	-195.23	-196.195	-195.242	-196.247	-195.244	-196.263	-196.404	-197.41	-196.416	-197.463	-196.419	-197.479	-196.404	-197.41	-196.416	-197.463	-196.419	-197.479	-195.23	-196.195	-195.242	-196.247	-195.244	-196.263		2.4118e-05	-0.105517	-0.0524154	-0.0531252
0.188656	37_Cyclopentane-Neopentane_2.00_dimer.out	-391.634	-393.605	-391.658	-393.711	-391.664	-393.742	-195.23	-196.195	-195.242	-196.247	-195.244	-196.263	-196.404	-197.41	-196.416	-197.463	-196.419	-197.479	-196.404	-197.41	-196.416	-197.463	-196.419	-197.479	-195.23	-196.195	-195.242	-196.247	-195.244	-196.263		1.30826e-06	-0.105539	-0.0524154	-0.0531252
2.19808	38_Cyclopentane-Cyclopentane_0.90_dimer.out	-390.45	-392.393	-390.473	-392.498	-390.479	-392.529	-195.23	-196.195	-195.242	-196.247	-195.244	-196.263	-195.23	-196.195	-195.242	-196.247	-195.244	-196.263	-195.23	-196.195	-195.242	-196.247	-195.244	-196.263	-195.23	-196.195	-195.242	-196.247	-195.244	-196.263		-2.94993e-05	-0.104856	-0.0524132	-0.0524135
2.80041	38_Cyclopentane-Cyclopentane_0.95_dimer.out	-390.453	-392.394	-390.477	-392.499	-390.482	-392.53	-195.23	-196.195	-195.242	-196.247	-195.244	-196.263	-195.23	-196.195	-195.242	-196.247	-195.244	-196.263	-195.23	-196.195	-195.242	-196.247	-195.244	-196.263	-195.23	-196.195	-195.242	-196.247	-195.244	-196.263		2.98489e-05	-0.104797	-0.0524132	-0.0524135
2.95617	38_Cyclopentane-Cyclopentane_1.00_dimer.out	-390.456	-392.394	-390.479	-392.499	-390.485	-392.53	-195.23	-196.195	-195.242	-196.247	-195.244	-196.263	-195.23	-196.195	-195.242	-196.247	-195.244	-196.263	-195.23	-196.195	-195.242	-196.247	-195.244	-196.263	-195.23	-196.195	-195.242	-196.247	-195.244	-196.263		6.14325e-05	-0.104765	-0.0524132	-0.0524135
2.82352	38_Cyclopentane-Cyclopentane_1.05_dimer.out	-390.457	-392.394	-390.481	-392.499	-390.486	-392.53	-195.23	-196.195	-195.242	-196.247	-195.244	-196.263	-195.23	-196.195	-195.242	-196.247	-195.244	-196.263	-195.23	-196.195	-195.242	-196.247	-195.244	-196.263	-195.23	-196.195	-195.242	-196.247	-195.244	-196.263		8.64863e-05	-0.10474	-0.0524132	-0.0524135
2.56285	38_Cyclopentane-Cyclopentane_1.10_dimer.out	-390.458	-392.394	-390.482	-392.499	-390.487	-392.53	-195.23	-196.195	-195.242	-196.247	-195.244	-196.263	-195.23	-196.195	-195.242	-196.247	-195.244	-196.263	-195.23	-196.195	-195.242	-196.247	-195.244	-196.263	-195.23	-196.195	-195.242	-196.247	-195.244	-196.263		6.61073e-05	-0.104761	-0.0524132	-0.0524135
1.69325	38_Cyclopentane-Cyclopentane_1.25_dimer.out	-390.459	-392.393	-390.483	-392.497	-390.488	-392.528	-195.23	-196.195	-195.242	-196.247	-195.244	-196.263	-195.23	-196.195	-195.242	-196.247	-195.244	-196.263	-195.23	-196.195	-195.242	-196.247	-195.244	-196.263	-195.23	-196.195	-195.242	-196.247	-195.244	-196.263		1.61786e-05	-0.104811	-0.0524132	-0.0524135
0.780367	38_Cyclopentane-Cyclopentane_1.50_dimer.out	-390.46	-392.391	-390.483	-392.496	-390.488	-392.527	-195.23	-196.195	-195.242	-196.247	-195.244	-196.263	-195.23	-196.195	-195.242	-196.247	-195.244	-196.263	-195.23	-196.195	-195.242	-196.247	-195.244	-196.263	-195.23	-196.195	-195.242	-196.247	-195.244	-196.263		5.22771e-06	-0.104821	-0.0524132	-0.0524135
0.200665	38_Cyclopentane-Cyclopentane_2.00_dimer.out	-390.46	-392.39	-390.483	-392.495	-390.489	-392.526	-195.23	-196.195	-195.242	-196.247	-195.244	-196.263	-195.23	-196.195	-195.242	-196.247	-195.244	-196.263	-195.23	-196.195	-195.242	-196.247	-195.244	-196.263	-195.23	-196.195	-195.242	-196.247	-195.244	-196.263		3.35453e-06	-0.104823	-0.0524132	-0.0524135
1.9687	39_Benzene-Cyclopentane_0.90_dimer.out	-425.997	-428.016	-426.022	-428.128	-426.028	-428.161	-230.781	-231.818	-230.794	-231.877	-230.797	-231.895	-195.23	-196.195	-195.242	-196.247	-195.244	-196.263	-195.23	-196.195	-195.242	-196.247	-195.244	-196.263	-230.781	-231.819	-230.794	-231.877	-230.797	-231.895		0.000240486	-0.111577	-0.0593967	-0.0524211
3.08098	39_Benzene-Cyclopentane_0.95_dimer.out	-426.003	-428.018	-426.028	-428.129	-426.033	-428.162	-230.781	-231.818	-230.794	-231.877	-230.797	-231.895	-195.23	-196.195	-195.242	-196.247	-195.244	-196.263	-195.23	-196.195	-195.242	-196.247	-195.244	-196.263	-230.781	-231.819	-230.794	-231.877	-230.797	-231.895		0.000131618	-0.111686	-0.0593967	-0.0524211
3.43781	39_Benzene-Cyclopentane_1.00_dimer.out	-426.006	-428.018	-426.031	-428.13	-426.036	-428.163	-230.781	-231.818	-230.794	-231.877	-230.797	-231.895	-195.23	-196.195	-195.242	-196.247	-195.244	-196.263	-195.23	-196.195	-195.242	-196.247	-195.244	-196.263	-230.781	-231.818	-230.794	-231.877	-230.797	-231.895		0.000162053	-0.111656	-0.0593967	-0.0524211
3.36393	39_Benzene-Cyclopentane_1.05_dimer.out	-426.008	-428.018	-426.033	-428.13	-426.039	-428.163	-230.781	-231.818	-230.794	-231.877	-230.797	-231.895	-195.23	-196.195	-195.242	-196.247	-195.244	-196.263	-195.23	-196.195	-195.242	-196.247	-195.244	-196.263	-230.781	-231.818	-230.794	-231.877	-230.797	-231.895		0.000196146	-0.111622	-0.0593967	-0.0524211
3.08312	39_Benzene-Cyclopentane_1.10_dimer.out	-426.009	-428.018	-426.034	-428.129	-426.04	-428.163	-230.781	-231.818	-230.794	-231.877	-230.797	-231.895	-195.23	-196.195	-195.242	-196.247	-195.244	-196.263	-195.23	-196.195	-195.242	-196.247	-195.244	-196.263	-230.781	-231.818	-230.794	-231.877	-230.797	-231.895		0.00021266	-0.111605	-0.0593967	-0.0524211
2.02564	39_Benzene-Cyclopentane_1.25_dimer.out	-426.011	-428.016	-426.036	-428.128	-426.041	-428.161	-230.781	-231.818	-230.794	-231.877	-230.797	-231.895	-195.23	-196.195	-195.242	-196.247	-195.244	-196.263	-195.23	-196.195	-195.242	-196.247	-195.244	-196.263	-230.781	-231.818	-230.794	-231.877	-230.797	-231.895		0.000183276	-0.111635	-0.0593967	-0.0524211
0.88369	39_Benzene-Cyclopentane_1.50_dimer.out	-426.011	-428.014	-426.036	-428.126	-426.042	-428.159	-230.781	-231.818	-230.794	-231.877	-230.797	-231.895	-195.23	-196.195	-195.242	-196.247	-195.244	-196.263	-195.23	-196.195	-195.242	-196.247	-195.244	-196.263	-230.781	-231.818	-230.794	-231.877	-230.797	-231.895		8.15011e-05	-0.111736	-0.0593967	-0.0524211
0.188667	39_Benzene-Cyclopentane_2.00_dimer.out	-426.011	-428.013	-426.036	-428.125	-426.042	-428.158	-230.781	-231.818	-230.794	-231.877	-230.797	-231.895	-195.23	-196.195	-195.242	-196.247	-195.244	-196.263	-195.23	-196.195	-195.242	-196.247	-195.244	-196.263	-230.781	-231.818	-230.794	-231.877	-230.797	-231.895		3.34942e-05	-0.111784	-0.0593967	-0.0524211
1.7119	40_Benzene-Neopentane_0.90_dimer.out	-427.175	-429.23	-427.201	-429.343	-427.206	-429.376	-230.781	-231.818	-230.794	-231.877	-230.797	-231.895	-196.404	-197.41	-196.416	-197.463	-196.419	-197.479	-196.404	-197.41	-196.416	-197.463	-196.419	-197.479	-230.781	-231.819	-230.794	-231.877	-230.797	-231.895		0.000121902	-0.112402	-0.0594007	-0.0531227
2.54891	40_Benzene-Neopentane_0.95_dimer.out	-427.179	-429.232	-427.205	-429.344	-427.21	-429.378	-230.781	-231.818	-230.794	-231.877	-230.797	-231.895	-196.404	-197.41	-196.416	-197.463	-196.419	-197.479	-196.404	-197.41	-196.416	-197.463	-196.419	-197.479	-230.781	-231.818	-230.794	-231.877	-230.797	-231.895		8.91839e-05	-0.112434	-0.0594007	-0.0531227
2.79053	40_Benzene-Neopentane_1.00_dimer.out	-427.182	-429.232	-427.207	-429.345	-427.213	-429.378	-230.781	-231.818	-230.794	-231.877	-230.797	-231.895	-196.404	-197.41	-196.416	-197.463	-196.419	-197.479	-196.404	-197.41	-196.416	-197.463	-196.419	-197.479	-230.781	-231.818	-230.794	-231.877	-230.797	-231.895		0.000141929	-0.112381	-0.0594007	-0.0531227
2.72088	40_Benzene-Neopentane_1.05_dimer.out	-427.183	-429.232	-427.209	-429.345	-427.214	-429.378	-230.781	-231.818	-230.794	-231.877	-230.797	-231.895	-196.404	-197.41	-196.416	-197.463	-196.419	-197.479	-196.404	-197.41	-196.416	-197.463	-196.419	-197.479	-230.781	-231.818	-230.794	-231.877	-230.797	-231.895		0.000168183	-0.112355	-0.0594007	-0.0531227
2.5023	40_Benzene-Neopentane_1.10_dimer.out	-427.184	-429.232	-427.21	-429.344	-427.215	-429.378	-230.781	-231.818	-230.794	-231.877	-230.797	-231.895	-196.404	-197.41	-196.416	-197.463	-196.419	-197.479	-196.404	-197.41	-196.416	-197.463	-196.419	-197.479	-230.781	-231.818	-230.794	-231.877	-230.797	-231.895		0.00017895	-0.112344	-0.0594007	-0.0531227
1.67429	40_Benzene-Neopentane_1.25_dimer.out	-427.185	-429.231	-427.211	-429.343	-427.216	-429.376	-230.781	-231.818	-230.794	-231.877	-230.797	-231.895	-196.404	-197.41	-196.416	-197.463	-196.419	-197.479	-196.404	-197.41	-196.416	-197.463	-196.419	-197.479	-230.781	-231.818	-230.794	-231.877	-230.797	-231.895		0.000159429	-0.112364	-0.0594007	-0.0531227
0.762121	40_Benzene-Neopentane_1.50_dimer.out	-427.185	-429.229	-427.211	-429.342	-427.217	-429.375	-230.781	-231.818	-230.794	-231.877	-230.797	-231.895	-196.404	-197.41	-196.416	-197.463	-196.419	-197.479	-196.404	-197.41	-196.416	-197.463	-196.419	-197.479	-230.781	-231.818	-230.794	-231.877	-230.797	-231.895		7.53513e-05	-0.112448	-0.0594007	-0.0531227
0.186544	40_Benzene-Neopentane_2.00_dimer.out	-427.185	-429.228	-427.211	-429.341	-427.216	-429.374	-230.781	-231.818	-230.794	-231.877	-230.797	-231.895	-196.404	-197.41	-196.416	-197.463	-196.419	-197.479	-196.404	-197.41	-196.416	-197.463	-196.419	-197.479	-230.781	-231.818	-230.794	-231.877	-230.797	-231.895		2.97419e-05	-0.112494	-0.0594007	-0.0531227
3.67913	41_Uracil-Pentane_0.90_dimer.out	-609.015	-611.614	-609.053	-611.775	-609.061	-611.825	-412.624	-414.205	-412.65	-414.313	-412.656	-414.346	-196.404	-197.403	-196.416	-197.457	-196.419	-197.473	-196.404	-197.404	-196.416	-197.457	-196.419	-197.473	-412.625	-414.206	-412.65	-414.313	-412.656	-414.346		0.000160679	-0.161376	-0.10803	-0.0535065
4.56038	41_Uracil-Pentane_0.95_dimer.out	-609.02	-611.615	-609.058	-611.777	-609.066	-611.826	-412.624	-414.205	-412.65	-414.313	-412.656	-414.346	-196.404	-197.403	-196.416	-197.457	-196.419	-197.473	-196.404	-197.404	-196.416	-197.457	-196.419	-197.473	-412.625	-414.205	-412.65	-414.313	-412.656	-414.346		0.000162538	-0.161374	-0.10803	-0.0535065
4.72406	41_Uracil-Pentane_1.00_dimer.out	-609.024	-611.616	-609.061	-611.777	-609.07	-611.827	-412.624	-414.205	-412.65	-414.313	-412.656	-414.346	-196.404	-197.403	-196.416	-197.457	-196.419	-197.473	-196.404	-197.404	-196.416	-197.457	-196.419	-197.473	-412.625	-414.205	-412.65	-414.313	-412.656	-414.346		0.000202037	-0.161334	-0.10803	-0.0535065
4.50168	41_Uracil-Pentane_1.05_dimer.out	-609.026	-611.615	-609.063	-611.777	-609.072	-611.826	-412.624	-414.205	-412.65	-414.313	-412.656	-414.346	-196.404	-197.403	-196.416	-197.457	-196.419	-197.473	-196.404	-197.404	-196.416	-197.457	-196.419	-197.473	-412.625	-414.205	-412.65	-414.313	-412.656	-414.346		0.000204602	-0.161332	-0.10803	-0.0535065
3.99925	41_Uracil-Pentane_1.10_dimer.out	-609.027	-611.615	-609.065	-611.776	-609.073	-611.825	-412.624	-414.205	-412.65	-414.313	-412.656	-414.346	-196.404	-197.403	-196.416	-197.457	-196.419	-197.473	-196.404	-197.404	-196.416	-197.457	-196.419	-197.473	-412.624	-414.205	-412.65	-414.313	-412.656	-414.346		0.000215523	-0.161321	-0.10803	-0.0535065
2.40241	41_Uracil-Pentane_1.25_dimer.out	-609.028	-611.612	-609.066	-611.774	-609.074	-611.823	-412.624	-414.205	-412.65	-414.313	-412.656	-414.346	-196.404	-197.403	-196.416	-197.457	-196.419	-197.473	-196.404	-197.404	-196.416	-197.457	-196.419	-197.473	-412.624	-414.205	-412.65	-414.313	-412.656	-414.346		0.000178054	-0.161358	-0.10803	-0.0535065
0.961312	41_Uracil-Pentane_1.50_dimer.out	-609.028	-611.61	-609.066	-611.771	-609.075	-611.821	-412.624	-414.205	-412.65	-414.313	-412.656	-414.346	-196.404	-197.403	-196.416	-197.457	-196.419	-197.473	-196.404	-197.404	-196.416	-197.457	-196.419	-197.473	-412.624	-414.205	-412.65	-414.313	-412.656	-414.346		7.81451e-05	-0.161458	-0.10803	-0.0535065
0.212103	41_Uracil-Pentane_2.00_dimer.out	-609.028	-611.609	-609.066	-611.77	-609.075	-611.82	-412.624	-414.205	-412.65	-414.313	-412.656	-414.346	-196.404	-197.403	-196.416	-197.457	-196.419	-197.473	-196.404	-197.403	-196.416	-197.457	-196.419	-197.473	-412.624	-414.205	-412.65	-414.313	-412.656	-414.346		1.38322e-05	-0.161523	-0.10803	-0.0535065
2.89976	42_Uracil-Cyclopentane_0.90_dimer.out	-607.842	-610.404	-607.879	-610.565	-607.887	-610.614	-412.624	-414.205	-412.65	-414.313	-412.656	-414.346	-195.23	-196.195	-195.242	-196.247	-195.244	-196.263	-195.23	-196.195	-195.242	-196.247	-195.244	-196.263	-412.625	-414.206	-412.65	-414.313	-412.656	-414.346		0.000359704	-0.160081	-0.10803	-0.0524104
3.83639	42_Uracil-Cyclopentane_0.95_dimer.out	-607.847	-610.406	-607.884	-610.566	-607.892	-610.615	-412.624	-414.205	-412.65	-414.313	-412.656	-414.346	-195.23	-196.195	-195.242	-196.247	-195.244	-196.263	-195.23	-196.195	-195.242	-196.247	-195.244	-196.263	-412.625	-414.205	-412.65	-414.313	-412.656	-414.346		0.000305972	-0.160134	-0.10803	-0.0524104
4.01859	42_Uracil-Cyclopentane_1.00_dimer.out	-607.85	-610.406	-607.887	-610.566	-607.895	-610.616	-412.624	-414.205	-412.65	-414.313	-412.656	-414.346	-195.23	-196.195	-195.242	-196.247	-195.244	-196.263	-195.23	-196.195	-195.242	-196.247	-195.244	-196.263	-412.625	-414.205	-412.65	-414.313	-412.656	-414.346		0.000291182	-0.160149	-0.10803	-0.0524104
3.82252	42_Uracil-Cyclopentane_1.05_dimer.out	-607.852	-610.406	-607.889	-610.566	-607.897	-610.615	-412.624	-414.205	-412.65	-414.313	-412.656	-414.346	-195.23	-196.195	-195.242	-196.247	-195.244	-196.263	-195.23	-196.195	-195.242	-196.247	-195.244	-196.263	-412.625	-414.205	-412.65	-414.313	-412.656	-414.346		0.000283328	-0.160157	-0.10803	-0.0524104
3.45872	42_Uracil-Cyclopentane_1.10_dimer.out	-607.853	-610.405	-607.89	-610.566	-607.898	-610.615	-412.624	-414.205	-412.65	-414.313	-412.656	-414.346	-195.23	-196.195	-195.242	-196.247	-195.244	-196.263	-195.23	-196.195	-195.242	-196.247	-195.244	-196.263	-412.624	-414.205	-412.65	-414.313	-412.656	-414.346		0.00027361	-0.160167	-0.10803	-0.0524104
2.2488	42_Uracil-Cyclopentane_1.25_dimer.out	-607.854	-610.403	-607.891	-610.564	-607.9	-610.613	-412.624	-414.205	-412.65	-414.313	-412.656	-414.346	-195.23	-196.195	-195.242	-196.247	-195.244	-196.263	-195.23	-196.195	-195.242	-196.247	-195.244	-196.263	-412.624	-414.205	-412.65	-414.313	-412.656	-414.346		0.000212947	-0.160227	-0.10803	-0.0524104
1.00044	42_Uracil-Cyclopentane_1.50_dimer.out	-607.854	-610.401	-607.892	-610.562	-607.9	-610.611	-412.624	-414.205	-412.65	-414.313	-412.656	-414.346	-195.23	-196.195	-195.242	-196.247	-195.244	-196.263	-195.23	-196.195	-195.242	-196.247	-195.244	-196.263	-412.624	-414.205	-412.65	-414.313	-412.656	-414.346		8.33367e-05	-0.160357	-0.10803	-0.0524104
0.24558	42_Uracil-Cyclopentane_2.00_dimer.out	-607.854	-610.4	-607.892	-610.561	-607.9	-610.61	-412.624	-414.205	-412.65	-414.313	-412.656	-414.346	-195.23	-196.195	-195.242	-196.247	-195.244	-196.263	-195.23	-196.195	-195.242	-196.247	-195.244	-196.263	-412.624	-414.205	-412.65	-414.313	-412.656	-414.346		1.90916e-05	-0.160421	-0.10803	-0.0524104
2.75624	43_Uracil-Neopentane_0.90_dimer.out	-609.02	-611.619	-609.057	-611.78	-609.066	-611.829	-412.624	-414.205	-412.65	-414.313	-412.656	-414.346	-196.404	-197.41	-196.416	-197.463	-196.419	-197.479	-196.404	-197.41	-196.416	-197.463	-196.419	-197.479	-412.625	-414.205	-412.65	-414.313	-412.656	-414.346		0.000135557	-0.161016	-0.108033	-0.0531193
3.49966	43_Uracil-Neopentane_0.95_dimer.out	-609.024	-611.62	-609.061	-611.781	-609.07	-611.831	-412.624	-414.205	-412.65	-414.313	-412.656	-414.346	-196.404	-197.41	-196.416	-197.463	-196.419	-197.479	-196.404	-197.41	-196.416	-197.463	-196.419	-197.479	-412.624	-414.205	-412.65	-414.313	-412.656	-414.346		0.000142427	-0.16101	-0.108033	-0.0531193
3.61265	43_Uracil-Neopentane_1.00_dimer.out	-609.026	-611.62	-609.064	-611.781	-609.072	-611.831	-412.624	-414.205	-412.65	-414.313	-412.656	-414.346	-196.404	-197.41	-196.416	-197.463	-196.419	-197.479	-196.404	-197.41	-196.416	-197.463	-196.419	-197.479	-412.624	-414.205	-412.65	-414.313	-412.656	-414.346		0.000156683	-0.160995	-0.108033	-0.0531193
3.4152	43_Uracil-Neopentane_1.05_dimer.out	-609.027	-611.62	-609.065	-611.781	-609.073	-611.831	-412.624	-414.205	-412.65	-414.313	-412.656	-414.346	-196.404	-197.41	-196.416	-197.463	-196.419	-197.479	-196.404	-197.41	-196.416	-197.463	-196.419	-197.479	-412.624	-414.205	-412.65	-414.313	-412.656	-414.346		0.000152677	-0.160999	-0.108033	-0.0531193
3.0833	43_Uracil-Neopentane_1.10_dimer.out	-609.028	-611.62	-609.066	-611.781	-609.074	-611.83	-412.624	-414.205	-412.65	-414.313	-412.656	-414.346	-196.404	-197.41	-196.416	-197.463	-196.419	-197.479	-196.404	-197.41	-196.416	-197.463	-196.419	-197.479	-412.624	-414.205	-412.65	-414.313	-412.656	-414.346		0.00015289	-0.160999	-0.108033	-0.0531193
2.01329	43_Uracil-Neopentane_1.25_dimer.out	-609.029	-611.618	-609.067	-611.779	-609.075	-611.828	-412.624	-414.205	-412.65	-414.313	-412.656	-414.346	-196.404	-197.41	-196.416	-197.463	-196.419	-197.479	-196.404	-197.41	-196.416	-197.463	-196.419	-197.479	-412.624	-414.205	-412.65	-414.313	-412.656	-414.346		0.000120307	-0.161032	-0.108033	-0.0531193
0.912106	43_Uracil-Neopentane_1.50_dimer.out	-609.029	-611.616	-609.067	-611.777	-609.075	-611.827	-412.624	-414.205	-412.65	-414.313	-412.656	-414.346	-196.404	-197.41	-196.416	-197.463	-196.419	-197.479	-196.404	-197.41	-196.416	-197.463	-196.419	-197.479	-412.624	-414.205	-412.65	-414.313	-412.656	-414.346		6.43441e-05	-0.161088	-0.108033	-0.0531193
0.228658	43_Uracil-Neopentane_2.00_dimer.out	-609.028	-611.615	-609.066	-611.776	-609.075	-611.826	-412.624	-414.205	-412.65	-414.313	-412.656	-414.346	-196.404	-197.41	-196.416	-197.463	-196.419	-197.479	-196.404	-197.41	-196.416	-197.463	-196.419	-197.479	-412.624	-414.205	-412.65	-414.313	-412.656	-414.346		1.90803e-05	-0.161133	-0.108033	-0.0531193
1.59748	44_Ethene-Pentane_0.90_dimer.out	-274.463	-275.848	-274.479	-275.923	-274.483	-275.945	-78.0645	-78.4427	-78.0694	-78.4636	-78.0705	-78.4696	-196.404	-197.404	-196.416	-197.457	-196.419	-197.473	-196.404	-197.404	-196.416	-197.457	-196.419	-197.473	-78.0646	-78.4429	-78.0694	-78.4636	-78.0705	-78.4697		-0.000161986	-0.0745362	-0.0208606	-0.0535136
1.91823	44_Ethene-Pentane_0.95_dimer.out	-274.465	-275.849	-274.482	-275.924	-274.486	-275.946	-78.0645	-78.4427	-78.0694	-78.4636	-78.0705	-78.4696	-196.404	-197.404	-196.416	-197.457	-196.419	-197.473	-196.404	-197.404	-196.416	-197.457	-196.419	-197.473	-78.0646	-78.4428	-78.0694	-78.4636	-78.0705	-78.4697		-0.000116319	-0.0744905	-0.0208606	-0.0535136
1.94265	44_Ethene-Pentane_1.00_dimer.out	-274.466	-275.849	-274.483	-275.924	-274.487	-275.946	-78.0645	-78.4427	-78.0694	-78.4636	-78.0705	-78.4696	-196.404	-197.404	-196.416	-197.457	-196.419	-197.473	-196.404	-197.404	-196.416	-197.457	-196.419	-197.473	-78.0646	-78.4428	-78.0694	-78.4636	-78.0705	-78.4697		-9.21228e-05	-0.0744663	-0.0208606	-0.0535136
1.82187	44_Ethene-Pentane_1.05_dimer.out	-274.467	-275.849	-274.484	-275.923	-274.488	-275.945	-78.0645	-78.4427	-78.0694	-78.4636	-78.0705	-78.4696	-196.404	-197.404	-196.416	-197.457	-196.419	-197.473	-196.404	-197.404	-196.416	-197.457	-196.419	-197.473	-78.0646	-78.4428	-78.0694	-78.4636	-78.0705	-78.4696		-6.61452e-05	-0.0744403	-0.0208606	-0.0535136
1.63925	44_Ethene-Pentane_1.10_dimer.out	-274.468	-275.849	-274.485	-275.923	-274.489	-275.945	-78.0645	-78.4427	-78.0694	-78.4636	-78.0705	-78.4696	-196.404	-197.404	-196.416	-197.457	-196.419	-197.473	-196.404	-197.404	-196.416	-197.457	-196.419	-197.473	-78.0646	-78.4428	-78.0694	-78.4636	-78.0705	-78.4696		-5.18755e-05	-0.0744261	-0.0208606	-0.0535136
1.06878	44_Ethene-Pentane_1.25_dimer.out	-274.468	-275.848	-274.485	-275.922	-274.489	-275.944	-78.0645	-78.4427	-78.0694	-78.4636	-78.0705	-78.4696	-196.404	-197.404	-196.416	-197.457	-196.419	-197.473	-196.404	-197.404	-196.416	-197.457	-196.419	-197.473	-78.0646	-78.4428	-78.0694	-78.4636	-78.0705	-78.4696		3.40494e-06	-0.0743708	-0.0208606	-0.0535136
0.481353	44_Ethene-Pentane_1.50_dimer.out	-274.469	-275.847	-274.486	-275.921	-274.49	-275.943	-78.0645	-78.4427	-78.0694	-78.4636	-78.0705	-78.4696	-196.404	-197.404	-196.416	-197.457	-196.419	-197.473	-196.404	-197.404	-196.416	-197.457	-196.419	-197.473	-78.0646	-78.4427	-78.0694	-78.4636	-78.0705	-78.4696		1.06541e-06	-0.0743731	-0.0208606	-0.0535136
0.117369	44_Ethene-Pentane_2.00_dimer.out	-274.469	-275.846	-274.486	-275.921	-274.49	-275.943	-78.0645	-78.4427	-78.0694	-78.4636	-78.0705	-78.4696	-196.404	-197.404	-196.416	-197.457	-196.419	-197.473	-196.404	-197.404	-196.416	-197.457	-196.419	-197.473	-78.0646	-78.4427	-78.0694	-78.4636	-78.0705	-78.4696		3.62887e-06	-0.0743706	-0.0208606	-0.0535136
0.991646	45_Ethyne-Pentane_0.90_dimer.out	-273.246	-274.596	-273.263	-274.67	-273.267	-274.691	-76.8489	-77.1915	-76.8535	-77.2111	-76.8544	-77.2168	-196.404	-197.403	-196.416	-197.457	-196.419	-197.473	-196.404	-197.404	-196.416	-197.457	-196.419	-197.473	-76.849	-77.1918	-76.8535	-77.2111	-76.8545	-77.2168		-0.000141148	-0.0732248	-0.0195633	-0.0535203
1.50954	45_Ethyne-Pentane_0.95_dimer.out	-273.249	-274.597	-273.266	-274.67	-273.269	-274.692	-76.8489	-77.1915	-76.8535	-77.2111	-76.8544	-77.2168	-196.404	-197.403	-196.416	-197.457	-196.419	-197.473	-196.404	-197.403	-196.416	-197.457	-196.419	-197.473	-76.849	-77.1918	-76.8535	-77.2111	-76.8545	-77.2168		-7.96367e-05	-0.0731632	-0.0195633	-0.0535203
1.64553	45_Ethyne-Pentane_1.00_dimer.out	-273.251	-274.598	-273.267	-274.671	-273.271	-274.692	-76.8489	-77.1915	-76.8535	-77.2111	-76.8544	-77.2168	-196.404	-197.403	-196.416	-197.457	-196.419	-197.473	-196.404	-197.403	-196.416	-197.457	-196.419	-197.473	-76.849	-77.1917	-76.8535	-77.2111	-76.8545	-77.2168		-3.32416e-05	-0.0731169	-0.0195633	-0.0535203
1.5887	45_Ethyne-Pentane_1.05_dimer.out	-273.252	-274.597	-273.268	-274.671	-273.272	-274.692	-76.8489	-77.1915	-76.8535	-77.2111	-76.8544	-77.2168	-196.404	-197.403	-196.416	-197.457	-196.419	-197.473	-196.404	-197.403	-196.416	-197.457	-196.419	-197.473	-76.8489	-77.1917	-76.8535	-77.2111	-76.8545	-77.2168		-6.70357e-06	-0.0730903	-0.0195633	-0.0535203
1.44438	45_Ethyne-Pentane_1.10_dimer.out	-273.252	-274.597	-273.269	-274.67	-273.273	-274.692	-76.8489	-77.1915	-76.8535	-77.2111	-76.8544	-77.2168	-196.404	-197.403	-196.416	-197.457	-196.419	-197.473	-196.404	-197.403	-196.416	-197.457	-196.419	-197.473	-76.8489	-77.1917	-76.8535	-77.2111	-76.8545	-77.2168		1.14921e-05	-0.0730721	-0.0195633	-0.0535203
0.932426	45_Ethyne-Pentane_1.25_dimer.out	-273.253	-274.597	-273.269	-274.67	-273.273	-274.691	-76.8489	-77.1915	-76.8535	-77.2111	-76.8544	-77.2168	-196.404	-197.403	-196.416	-197.457	-196.419	-197.473	-196.404	-197.403	-196.416	-197.457	-196.419	-197.473	-76.8489	-77.1916	-76.8535	-77.2111	-76.8545	-77.2168		4.32288e-05	-0.0730404	-0.0195633	-0.0535203
0.400234	45_Ethyne-Pentane_1.50_dimer.out	-273.253	-274.596	-273.27	-274.669	-273.273	-274.69	-76.8489	-77.1915	-76.8535	-77.2111	-76.8544	-77.2168	-196.404	-197.403	-196.416	-197.457	-196.419	-197.473	-196.404	-197.403	-196.416	-197.457	-196.419	-197.473	-76.8489	-77.1916	-76.8535	-77.2111	-76.8544	-77.2168		2.37783e-05	-0.0730598	-0.0195633	-0.0535203
0.0916728	45_Ethyne-Pentane_2.00_dimer.out	-273.253	-274.595	-273.27	-274.668	-273.273	-274.69	-76.8489	-77.1915	-76.8535	-77.2111	-76.8544	-77.2168	-196.404	-197.403	-196.416	-197.457	-196.419	-197.473	-196.404	-197.403	-196.416	-197.457	-196.419	-197.473	-76.8489	-77.1916	-76.8535	-77.2111	-76.8544	-77.2168		1.39171e-05	-0.0730697	-0.0195633	-0.0535203
3.65478	46_Peptide-Pentane_0.90_dimer.out	-443.497	-445.549	-443.525	-445.669	-443.531	-445.705	-247.102	-248.14	-247.118	-248.207	-247.122	-248.227	-196.404	-197.403	-196.416	-197.457	-196.419	-197.473	-196.404	-197.404	-196.416	-197.457	-196.419	-197.473	-247.103	-248.141	-247.118	-248.207	-247.122	-248.227		-1.79242e-05	-0.120004	-0.0664759	-0.0535098
4.115	46_Peptide-Pentane_0.95_dimer.out	-443.501	-445.55	-443.528	-445.67	-443.535	-445.706	-247.102	-248.14	-247.118	-248.207	-247.122	-248.227	-196.404	-197.403	-196.416	-197.457	-196.419	-197.473	-196.404	-197.404	-196.416	-197.457	-196.419	-197.473	-247.103	-248.14	-247.118	-248.207	-247.122	-248.227		1.07743e-05	-0.119975	-0.0664759	-0.0535098
4.16179	46_Peptide-Pentane_1.00_dimer.out	-443.503	-445.55	-443.531	-445.67	-443.537	-445.706	-247.102	-248.14	-247.118	-248.207	-247.122	-248.227	-196.404	-197.403	-196.416	-197.457	-196.419	-197.473	-196.404	-197.404	-196.416	-197.457	-196.419	-197.473	-247.103	-248.14	-247.118	-248.207	-247.122	-248.227		-2.63099e-06	-0.119988	-0.0664759	-0.0535098
3.97387	46_Peptide-Pentane_1.05_dimer.out	-443.504	-445.55	-443.532	-445.67	-443.538	-445.706	-247.102	-248.14	-247.118	-248.207	-247.122	-248.227	-196.404	-197.403	-196.416	-197.457	-196.419	-197.473	-196.404	-197.404	-196.416	-197.457	-196.419	-197.473	-247.103	-248.14	-247.118	-248.207	-247.122	-248.227		1.12059e-05	-0.119974	-0.0664759	-0.0535098
3.66489	46_Peptide-Pentane_1.10_dimer.out	-443.505	-445.549	-443.533	-445.669	-443.539	-445.705	-247.102	-248.14	-247.118	-248.207	-247.122	-248.227	-196.404	-197.403	-196.416	-197.457	-196.419	-197.473	-196.404	-197.404	-196.416	-197.457	-196.419	-197.473	-247.103	-248.14	-247.118	-248.207	-247.122	-248.227		4.79661e-05	-0.119938	-0.0664759	-0.0535098
2.58551	46_Peptide-Pentane_1.25_dimer.out	-443.506	-445.548	-443.534	-445.668	-443.541	-445.704	-247.102	-248.14	-247.118	-248.207	-247.122	-248.227	-196.404	-197.403	-196.416	-197.457	-196.419	-197.473	-196.404	-197.404	-196.416	-197.457	-196.419	-197.473	-247.102	-248.14	-247.118	-248.207	-247.122	-248.227		8.20163e-05	-0.119904	-0.0664759	-0.0535098
1.17157	46_Peptide-Pentane_1.50_dimer.out	-443.507	-445.545	-443.534	-445.665	-443.541	-445.702	-247.102	-248.14	-247.118	-248.207	-247.122	-248.227	-196.404	-197.403	-196.416	-197.457	-196.419	-197.473	-196.404	-197.404	-196.416	-197.457	-196.419	-197.473	-247.102	-248.14	-247.118	-248.207	-247.122	-248.227		4.60447e-05	-0.11994	-0.0664759	-0.0535098
0.282057	46_Peptide-Pentane_2.00_dimer.out	-443.506	-445.544	-443.534	-445.664	-443.541	-445.7	-247.102	-248.14	-247.118	-248.207	-247.122	-248.227	-196.404	-197.403	-196.416	-197.457	-196.419	-197.473	-196.404	-197.403	-196.416	-197.457	-196.419	-197.473	-247.102	-248.14	-247.118	-248.207	-247.122	-248.227		1.13819e-05	-0.119974	-0.0664759	-0.0535098
1.49324	47_Benzene-Benzene_TS_0.90_dimer.out	-461.553	-463.639	-461.58	-463.757	-461.585	-463.792	-230.781	-231.818	-230.794	-231.877	-230.797	-231.895	-230.781	-231.818	-230.794	-231.877	-230.797	-231.895	-230.781	-231.818	-230.794	-231.877	-230.797	-231.895	-230.781	-231.819	-230.794	-231.877	-230.797	-231.895		0.000471859	-0.118319	-0.0593948	-0.0593959
2.45197	47_Benzene-Benzene_TS_0.95_dimer.out	-461.557	-463.64	-461.584	-463.758	-461.589	-463.794	-230.781	-231.818	-230.794	-231.877	-230.797	-231.895	-230.781	-231.818	-230.794	-231.877	-230.797	-231.895	-230.781	-231.818	-230.794	-231.877	-230.797	-231.895	-230.781	-231.818	-230.794	-231.877	-230.797	-231.895		0.000285789	-0.118505	-0.0593948	-0.0593959
2.76169	47_Benzene-Benzene_TS_1.00_dimer.out	-461.56	-463.64	-461.586	-463.759	-461.592	-463.794	-230.781	-231.818	-230.794	-231.877	-230.797	-231.895	-230.781	-231.818	-230.794	-231.877	-230.797	-231.895	-230.781	-231.818	-230.794	-231.877	-230.797	-231.895	-230.781	-231.818	-230.794	-231.877	-230.797	-231.895		0.000264813	-0.118526	-0.0593948	-0.0593959
2.73088	47_Benzene-Benzene_TS_1.05_dimer.out	-461.561	-463.64	-461.587	-463.759	-461.593	-463.794	-230.781	-231.818	-230.794	-231.877	-230.797	-231.895	-230.781	-231.818	-230.794	-231.877	-230.797	-231.895	-230.781	-231.818	-230.794	-231.877	-230.797	-231.895	-230.781	-231.818	-230.794	-231.877	-230.797	-231.895		0.000268834	-0.118522	-0.0593948	-0.0593959
2.53572	47_Benzene-Benzene_TS_1.10_dimer.out	-461.562	-463.64	-461.588	-463.759	-461.594	-463.794	-230.781	-231.818	-230.794	-231.877	-230.797	-231.895	-230.781	-231.818	-230.794	-231.877	-230.797	-231.895	-230.781	-231.818	-230.794	-231.877	-230.797	-231.895	-230.781	-231.818	-230.794	-231.877	-230.797	-231.895		0.000265525	-0.118525	-0.0593948	-0.0593959
1.73413	47_Benzene-Benzene_TS_1.25_dimer.out	-461.563	-463.639	-461.589	-463.757	-461.595	-463.792	-230.781	-231.818	-230.794	-231.877	-230.797	-231.895	-230.781	-231.818	-230.794	-231.877	-230.797	-231.895	-230.781	-231.818	-230.794	-231.877	-230.797	-231.895	-230.781	-231.818	-230.794	-231.877	-230.797	-231.895		0.00023062	-0.11856	-0.0593948	-0.0593959
0.817747	47_Benzene-Benzene_TS_1.50_dimer.out	-461.563	-463.637	-461.589	-463.756	-461.595	-463.791	-230.781	-231.818	-230.794	-231.877	-230.797	-231.895	-230.781	-231.818	-230.794	-231.877	-230.797	-231.895	-230.781	-231.818	-230.794	-231.877	-230.797	-231.895	-230.781	-231.818	-230.794	-231.877	-230.797	-231.895		0.000122299	-0.118668	-0.0593948	-0.0593959
0.222016	47_Benzene-Benzene_TS_2.00_dimer.out	-461.562	-463.636	-461.589	-463.755	-461.595	-463.79	-230.781	-231.818	-230.794	-231.877	-230.797	-231.895	-230.781	-231.818	-230.794	-231.877	-230.797	-231.895	-230.781	-231.818	-230.794	-231.877	-230.797	-231.895	-230.781	-231.818	-230.794	-231.877	-230.797	-231.895		4.63995e-05	-0.118744	-0.0593948	-0.0593959
2.40152	48_Pyridine-Pyridine_TS_0.90_dimer.out	-493.55	-495.697	-493.578	-495.822	-493.584	-495.86	-246.778	-247.847	-246.793	-247.909	-246.796	-247.928	-246.778	-247.847	-246.793	-247.909	-246.796	-247.928	-246.778	-247.847	-246.793	-247.909	-246.796	-247.928	-246.779	-247.847	-246.793	-247.91	-246.796	-247.928		0.000266737	-0.12537	-0.06282	-0.0628168
3.19871	48_Pyridine-Pyridine_TS_0.95_dimer.out	-493.553	-495.698	-493.582	-495.824	-493.588	-495.861	-246.778	-247.847	-246.793	-247.909	-246.796	-247.928	-246.778	-247.847	-246.793	-247.909	-246.796	-247.928	-246.778	-247.847	-246.793	-247.909	-246.796	-247.928	-246.779	-247.847	-246.793	-247.909	-246.796	-247.928		0.000176244	-0.125461	-0.06282	-0.0628168
3.43979	48_Pyridine-Pyridine_TS_1.00_dimer.out	-493.555	-495.699	-493.584	-495.824	-493.59	-495.862	-246.778	-247.847	-246.793	-247.909	-246.796	-247.928	-246.778	-247.847	-246.793	-247.909	-246.796	-247.928	-246.778	-247.847	-246.793	-247.909	-246.796	-247.928	-246.779	-247.847	-246.793	-247.909	-246.796	-247.928		0.000201532	-0.125435	-0.06282	-0.0628168
3.37507	48_Pyridine-Pyridine_TS_1.05_dimer.out	-493.557	-495.699	-493.585	-495.824	-493.591	-495.862	-246.778	-247.847	-246.793	-247.909	-246.796	-247.928	-246.778	-247.847	-246.793	-247.909	-246.796	-247.928	-246.778	-247.847	-246.793	-247.909	-246.796	-247.928	-246.779	-247.847	-246.793	-247.909	-246.796	-247.928		0.000201881	-0.125435	-0.06282	-0.0628168
3.15369	48_Pyridine-Pyridine_TS_1.10_dimer.out	-493.557	-495.698	-493.586	-495.824	-493.592	-495.861	-246.778	-247.847	-246.793	-247.909	-246.796	-247.928	-246.778	-247.847	-246.793	-247.909	-246.796	-247.928	-246.778	-247.847	-246.793	-247.909	-246.796	-247.928	-246.779	-247.847	-246.793	-247.909	-246.796	-247.928		0.000199585	-0.125437	-0.06282	-0.0628168
2.25925	48_Pyridine-Pyridine_TS_1.25_dimer.out	-493.558	-495.697	-493.587	-495.822	-493.593	-495.86	-246.778	-247.847	-246.793	-247.909	-246.796	-247.928	-246.778	-247.847	-246.793	-247.909	-246.796	-247.928	-246.778	-247.847	-246.793	-247.909	-246.796	-247.928	-246.778	-247.847	-246.793	-247.909	-246.796	-247.928		0.00020842	-0.125428	-0.06282	-0.0628168
1.16835	48_Pyridine-Pyridine_TS_1.50_dimer.out	-493.558	-495.695	-493.586	-495.821	-493.592	-495.858	-246.778	-247.847	-246.793	-247.909	-246.796	-247.928	-246.778	-247.847	-246.793	-247.909	-246.796	-247.928	-246.778	-247.847	-246.793	-247.909	-246.796	-247.928	-246.778	-247.847	-246.793	-247.909	-246.796	-247.928		0.000147582	-0.125489	-0.06282	-0.0628168
0.370157	48_Pyridine-Pyridine_TS_2.00_dimer.out	-493.557	-495.694	-493.586	-495.819	-493.592	-495.857	-246.778	-247.847	-246.793	-247.909	-246.796	-247.928	-246.778	-247.847	-246.793	-247.909	-246.796	-247.928	-246.778	-247.847	-246.793	-247.909	-246.796	-247.928	-246.778	-247.847	-246.793	-247.909	-246.796	-247.928		5.90519e-05	-0.125578	-0.06282	-0.0628168
1.94501	49_Benzene-Pyridine_TS_0.90_dimer.out	-477.551	-479.668	-477.579	-479.79	-477.585	-479.826	-230.781	-231.818	-230.794	-231.877	-230.797	-231.895	-246.778	-247.847	-246.793	-247.909	-246.796	-247.928	-246.778	-247.847	-246.793	-247.909	-246.796	-247.928	-230.781	-231.819	-230.794	-231.877	-230.797	-231.895		0.00043111	-0.12178	-0.0593881	-0.0628234
2.92164	49_Benzene-Pyridine_TS_0.95_dimer.out	-477.555	-479.669	-477.583	-479.791	-477.589	-479.828	-230.781	-231.818	-230.794	-231.877	-230.797	-231.895	-246.778	-247.847	-246.793	-247.909	-246.796	-247.928	-246.778	-247.847	-246.793	-247.909	-246.796	-247.928	-230.781	-231.819	-230.794	-231.877	-230.797	-231.895		0.000249073	-0.121962	-0.0593881	-0.0628234
3.2258	49_Benzene-Pyridine_TS_1.00_dimer.out	-477.558	-479.67	-477.585	-479.792	-477.591	-479.828	-230.781	-231.818	-230.794	-231.877	-230.797	-231.895	-246.778	-247.847	-246.793	-247.909	-246.796	-247.928	-246.778	-247.847	-246.793	-247.909	-246.796	-247.928	-230.781	-231.818	-230.794	-231.877	-230.797	-231.895		0.000235243	-0.121976	-0.0593881	-0.0628234
3.17573	49_Benzene-Pyridine_TS_1.05_dimer.out	-477.559	-479.67	-477.587	-479.792	-477.593	-479.828	-230.781	-231.818	-230.794	-231.877	-230.797	-231.895	-246.778	-247.847	-246.793	-247.909	-246.796	-247.928	-246.778	-247.847	-246.793	-247.909	-246.796	-247.928	-230.781	-231.818	-230.794	-231.877	-230.797	-231.895		0.000247208	-0.121964	-0.0593881	-0.0628234
2.95491	49_Benzene-Pyridine_TS_1.10_dimer.out	-477.56	-479.669	-477.587	-479.791	-477.593	-479.828	-230.781	-231.818	-230.794	-231.877	-230.797	-231.895	-246.778	-247.847	-246.793	-247.909	-246.796	-247.928	-246.778	-247.847	-246.793	-247.909	-246.796	-247.928	-230.781	-231.818	-230.794	-231.877	-230.797	-231.895		0.000247415	-0.121964	-0.0593881	-0.0628234
2.06781	49_Benzene-Pyridine_TS_1.25_dimer.out	-477.561	-479.668	-477.588	-479.79	-477.594	-479.826	-230.781	-231.818	-230.794	-231.877	-230.797	-231.895	-246.778	-247.847	-246.793	-247.909	-246.796	-247.928	-246.778	-247.847	-246.793	-247.909	-246.796	-247.928	-230.781	-231.818	-230.794	-231.877	-230.797	-231.895		0.000234406	-0.121977	-0.0593881	-0.0628234
1.04165	49_Benzene-Pyridine_TS_1.50_dimer.out	-477.56	-479.666	-477.588	-479.788	-477.594	-479.825	-230.781	-231.818	-230.794	-231.877	-230.797	-231.895	-246.778	-247.847	-246.793	-247.909	-246.796	-247.928	-246.778	-247.847	-246.793	-247.909	-246.796	-247.928	-230.781	-231.818	-230.794	-231.877	-230.797	-231.895		0.000128708	-0.122083	-0.0593881	-0.0628234
0.331789	49_Benzene-Pyridine_TS_2.00_dimer.out	-477.56	-479.665	-477.587	-479.787	-477.593	-479.824	-230.781	-231.818	-230.794	-231.877	-230.797	-231.895	-246.778	-247.847	-246.793	-247.909	-246.796	-247.928	-246.778	-247.847	-246.793	-247.909	-246.796	-247.928	-230.781	-231.818	-230.794	-231.877	-230.797	-231.895		5.32407e-05	-0.122158	-0.0593881	-0.0628234
1.79084	50_Benzene-Ethyne_CH-pi_0.90_dimer.out	-307.626	-309.013	-307.643	-309.091	-307.647	-309.114	-230.781	-231.818	-230.794	-231.877	-230.797	-231.895	-76.8488	-77.1915	-76.8534	-77.2111	-76.8544	-77.2168	-76.8489	-77.1918	-76.8534	-77.2112	-76.8544	-77.2168	-230.781	-231.819	-230.794	-231.877	-230.797	-231.895		0.000430879	-0.0785096	-0.0593873	-0.0195531
2.58043	50_Benzene-Ethyne_CH-pi_0.95_dimer.out	-307.629	-309.014	-307.646	-309.092	-307.65	-309.116	-230.781	-231.818	-230.794	-231.877	-230.797	-231.895	-76.8488	-77.1915	-76.8534	-77.2111	-76.8544	-77.2168	-76.8489	-77.1918	-76.8534	-77.2111	-76.8544	-77.2168	-230.781	-231.818	-230.794	-231.877	-230.797	-231.895		0.000214886	-0.0787255	-0.0593873	-0.0195531
2.80969	50_Benzene-Ethyne_CH-pi_1.00_dimer.out	-307.63	-309.014	-307.648	-309.093	-307.652	-309.116	-230.781	-231.818	-230.794	-231.877	-230.797	-231.895	-76.8488	-77.1915	-76.8534	-77.2111	-76.8544	-77.2168	-76.8489	-77.1917	-76.8534	-77.2111	-76.8544	-77.2168	-230.781	-231.818	-230.794	-231.877	-230.797	-231.895		0.000170812	-0.0787696	-0.0593873	-0.0195531
2.74707	50_Benzene-Ethyne_CH-pi_1.05_dimer.out	-307.631	-309.014	-307.649	-309.093	-307.653	-309.116	-230.781	-231.818	-230.794	-231.877	-230.797	-231.895	-76.8488	-77.1915	-76.8534	-77.2111	-76.8544	-77.2168	-76.8489	-77.1917	-76.8534	-77.2111	-76.8544	-77.2168	-230.781	-231.818	-230.794	-231.877	-230.797	-231.895		0.000161818	-0.0787786	-0.0593873	-0.0195531
2.54513	50_Benzene-Ethyne_CH-pi_1.10_dimer.out	-307.631	-309.014	-307.649	-309.092	-307.653	-309.116	-230.781	-231.818	-230.794	-231.877	-230.797	-231.895	-76.8488	-77.1915	-76.8534	-77.2111	-76.8544	-77.2168	-76.8489	-77.1917	-76.8534	-77.2111	-76.8544	-77.2168	-230.781	-231.818	-230.794	-231.877	-230.797	-231.895		0.000151914	-0.0787885	-0.0593873	-0.0195531
1.7721	50_Benzene-Ethyne_CH-pi_1.25_dimer.out	-307.632	-309.012	-307.649	-309.091	-307.653	-309.114	-230.781	-231.818	-230.794	-231.877	-230.797	-231.895	-76.8488	-77.1915	-76.8534	-77.2111	-76.8544	-77.2168	-76.8488	-77.1916	-76.8534	-77.2111	-76.8544	-77.2168	-230.781	-231.818	-230.794	-231.877	-230.797	-231.895		0.000161063	-0.0787794	-0.0593873	-0.0195531
0.88985	50_Benzene-Ethyne_CH-pi_1.50_dimer.out	-307.631	-309.011	-307.649	-309.09	-307.653	-309.113	-230.781	-231.818	-230.794	-231.877	-230.797	-231.895	-76.8488	-77.1915	-76.8534	-77.2111	-76.8544	-77.2168	-76.8488	-77.1916	-76.8534	-77.2111	-76.8544	-77.2168	-230.781	-231.818	-230.794	-231.877	-230.797	-231.895		8.61516e-05	-0.0788543	-0.0593873	-0.0195531
0.27212	50_Benzene-Ethyne_CH-pi_2.00_dimer.out	-307.63	-309.01	-307.648	-309.089	-307.652	-309.112	-230.781	-231.818	-230.794	-231.877	-230.797	-231.895	-76.8488	-77.1915	-76.8534	-77.2111	-76.8544	-77.2168	-76.8488	-77.1916	-76.8534	-77.2111	-76.8544	-77.2168	-230.781	-231.818	-230.794	-231.877	-230.797	-231.895		3.89187e-05	-0.0789015	-0.0593873	-0.0195531
1.16975	51_Ethyne-Ethyne_TS_0.90_dimer.out	-153.697	-154.385	-153.706	-154.424	-153.708	-154.435	-76.8489	-77.1915	-76.8535	-77.2111	-76.8545	-77.2168	-76.8488	-77.1915	-76.8534	-77.2111	-76.8544	-77.2168	-76.8489	-77.1916	-76.8535	-77.2111	-76.8544	-77.2168	-76.849	-77.1918	-76.8535	-77.2111	-76.8545	-77.2168		3.75532e-05	-0.0390862	-0.019564	-0.0195598
1.43404	51_Ethyne-Ethyne_TS_0.95_dimer.out	-153.698	-154.385	-153.707	-154.425	-153.709	-154.436	-76.8489	-77.1915	-76.8535	-77.2111	-76.8545	-77.2168	-76.8488	-77.1915	-76.8534	-77.2111	-76.8544	-77.2168	-76.8489	-77.1916	-76.8534	-77.2111	-76.8544	-77.2168	-76.849	-77.1917	-76.8535	-77.2111	-76.8545	-77.2168		4.31582e-05	-0.0390806	-0.019564	-0.0195598
1.48941	51_Ethyne-Ethyne_TS_1.00_dimer.out	-153.699	-154.385	-153.708	-154.425	-153.71	-154.436	-76.8489	-77.1915	-76.8535	-77.2111	-76.8545	-77.2168	-76.8488	-77.1915	-76.8534	-77.2111	-76.8544	-77.2168	-76.8489	-77.1916	-76.8534	-77.2111	-76.8544	-77.2168	-76.8489	-77.1917	-76.8535	-77.2111	-76.8545	-77.2168		5.16701e-06	-0.0391186	-0.019564	-0.0195598
1.43134	51_Ethyne-Ethyne_TS_1.05_dimer.out	-153.699	-154.385	-153.708	-154.424	-153.71	-154.436	-76.8489	-77.1915	-76.8535	-77.2111	-76.8545	-77.2168	-76.8488	-77.1915	-76.8534	-77.2111	-76.8544	-77.2168	-76.8489	-77.1916	-76.8534	-77.2111	-76.8544	-77.2168	-76.8489	-77.1917	-76.8535	-77.2111	-76.8545	-77.2168		1.69921e-05	-0.0391068	-0.019564	-0.0195598
1.31762	51_Ethyne-Ethyne_TS_1.10_dimer.out	-153.699	-154.385	-153.708	-154.424	-153.71	-154.436	-76.8489	-77.1915	-76.8535	-77.2111	-76.8545	-77.2168	-76.8488	-77.1915	-76.8534	-77.2111	-76.8544	-77.2168	-76.8489	-77.1916	-76.8534	-77.2111	-76.8544	-77.2168	-76.8489	-77.1917	-76.8535	-77.2111	-76.8545	-77.2168		3.13738e-05	-0.0390924	-0.019564	-0.0195598
0.913488	51_Ethyne-Ethyne_TS_1.25_dimer.out	-153.699	-154.385	-153.708	-154.424	-153.71	-154.435	-76.8489	-77.1915	-76.8535	-77.2111	-76.8545	-77.2168	-76.8488	-77.1915	-76.8534	-77.2111	-76.8544	-77.2168	-76.8489	-77.1916	-76.8534	-77.2111	-76.8544	-77.2168	-76.8489	-77.1916	-76.8535	-77.2111	-76.8545	-77.2168		6.66463e-05	-0.0390571	-0.019564	-0.0195598
0.4518	51_Ethyne-Ethyne_TS_1.50_dimer.out	-153.698	-154.384	-153.708	-154.423	-153.71	-154.434	-76.8489	-77.1915	-76.8535	-77.2111	-76.8545	-77.2168	-76.8488	-77.1915	-76.8534	-77.2111	-76.8544	-77.2168	-76.8489	-77.1916	-76.8534	-77.2111	-76.8544	-77.2168	-76.8489	-77.1916	-76.8535	-77.2111	-76.8545	-77.2168		4.41004e-05	-0.0390797	-0.019564	-0.0195598
0.133953	51_Ethyne-Ethyne_TS_2.00_dimer.out	-153.698	-154.383	-153.707	-154.422	-153.709	-154.434	-76.8489	-77.1915	-76.8535	-77.2111	-76.8545	-77.2168	-76.8488	-77.1915	-76.8534	-77.2111	-76.8544	-77.2168	-76.8488	-77.1916	-76.8534	-77.2111	-76.8544	-77.2168	-76.8489	-77.1916	-76.8535	-77.2111	-76.8545	-77.2168		1.64007e-05	-0.0391074	-0.019564	-0.0195598
3.90822	52_Benzene-AcOH_OH-pi_0.90_dimer.out	-458.683	-460.594	-458.711	-460.715	-458.717	-460.752	-230.781	-231.818	-230.794	-231.877	-230.797	-231.895	-227.905	-228.77	-227.92	-228.831	-227.923	-228.851	-227.905	-228.77	-227.92	-228.831	-227.923	-228.851	-230.781	-231.819	-230.794	-231.877	-230.797	-231.895		0.000299722	-0.120444	-0.0593761	-0.0613678
4.52526	52_Benzene-AcOH_OH-pi_0.95_dimer.out	-458.686	-460.595	-458.714	-460.716	-458.72	-460.753	-230.781	-231.818	-230.794	-231.877	-230.797	-231.895	-227.905	-228.77	-227.92	-228.831	-227.923	-228.851	-227.905	-228.77	-227.92	-228.831	-227.923	-228.851	-230.781	-231.819	-230.794	-231.877	-230.797	-231.895		0.000259808	-0.120484	-0.0593761	-0.0613678
4.65525	52_Benzene-AcOH_OH-pi_1.00_dimer.out	-458.687	-460.595	-458.715	-460.716	-458.722	-460.753	-230.781	-231.818	-230.794	-231.877	-230.797	-231.895	-227.905	-228.77	-227.92	-228.831	-227.923	-228.851	-227.905	-228.77	-227.92	-228.831	-227.923	-228.851	-230.781	-231.818	-230.794	-231.877	-230.797	-231.895		0.000244734	-0.120499	-0.0593761	-0.0613678
4.50756	52_Benzene-AcOH_OH-pi_1.05_dimer.out	-458.688	-460.595	-458.716	-460.716	-458.723	-460.753	-230.781	-231.818	-230.794	-231.877	-230.797	-231.895	-227.905	-228.77	-227.92	-228.831	-227.923	-228.851	-227.905	-228.77	-227.92	-228.831	-227.923	-228.851	-230.781	-231.818	-230.794	-231.877	-230.797	-231.895		0.000187903	-0.120556	-0.0593761	-0.0613678
4.21346	52_Benzene-AcOH_OH-pi_1.10_dimer.out	-458.689	-460.595	-458.717	-460.715	-458.723	-460.752	-230.781	-231.818	-230.794	-231.877	-230.797	-231.895	-227.905	-228.77	-227.92	-228.831	-227.923	-228.851	-227.905	-228.77	-227.92	-228.831	-227.923	-228.851	-230.781	-231.818	-230.794	-231.877	-230.797	-231.895		8.9863e-05	-0.120654	-0.0593761	-0.0613678
3.10667	52_Benzene-AcOH_OH-pi_1.25_dimer.out	-458.689	-460.593	-458.717	-460.714	-458.723	-460.75	-230.781	-231.818	-230.794	-231.877	-230.797	-231.895	-227.905	-228.77	-227.92	-228.831	-227.923	-228.851	-227.905	-228.77	-227.92	-228.831	-227.923	-228.851	-230.781	-231.818	-230.794	-231.877	-230.797	-231.895		0.000141396	-0.120603	-0.0593761	-0.0613678
1.69725	52_Benzene-AcOH_OH-pi_1.50_dimer.out	-458.688	-460.591	-458.716	-460.711	-458.722	-460.748	-230.781	-231.818	-230.794	-231.877	-230.797	-231.895	-227.905	-228.77	-227.92	-228.831	-227.923	-228.851	-227.905	-228.77	-227.92	-228.831	-227.923	-228.851	-230.781	-231.818	-230.794	-231.877	-230.797	-231.895		0.000120227	-0.120624	-0.0593761	-0.0613678
0.553786	52_Benzene-AcOH_OH-pi_2.00_dimer.out	-458.687	-460.589	-458.715	-460.71	-458.721	-460.746	-230.781	-231.818	-230.794	-231.877	-230.797	-231.895	-227.905	-228.77	-227.92	-228.831	-227.923	-228.851	-227.905	-228.77	-227.92	-228.831	-227.923	-228.851	-230.781	-231.818	-230.794	-231.877	-230.797	-231.895		4.91302e-05	-0.120695	-0.0593761	-0.0613678
3.7675	53_Benzene-AcNH2_NH-pi_0.90_dimer.out	-438.842	-440.73	-438.868	-440.846	-438.874	-440.881	-230.781	-231.818	-230.794	-231.877	-230.797	-231.895	-208.063	-208.906	-208.076	-208.963	-208.079	-208.98	-208.063	-208.907	-208.076	-208.963	-208.079	-208.98	-230.781	-231.818	-230.794	-231.877	-230.797	-231.895		9.41096e-05	-0.115461	-0.0593787	-0.0561762
4.24208	53_Benzene-AcNH2_NH-pi_0.95_dimer.out	-438.844	-440.731	-438.871	-440.847	-438.876	-440.881	-230.781	-231.818	-230.794	-231.877	-230.797	-231.895	-208.063	-208.906	-208.076	-208.963	-208.079	-208.98	-208.063	-208.907	-208.076	-208.963	-208.079	-208.98	-230.781	-231.818	-230.794	-231.877	-230.797	-231.895		9.24571e-05	-0.115462	-0.0593787	-0.0561762
4.33419	53_Benzene-AcNH2_NH-pi_1.00_dimer.out	-438.845	-440.731	-438.872	-440.847	-438.878	-440.882	-230.781	-231.818	-230.794	-231.877	-230.797	-231.895	-208.063	-208.906	-208.076	-208.963	-208.079	-208.98	-208.063	-208.907	-208.076	-208.963	-208.079	-208.98	-230.781	-231.818	-230.794	-231.877	-230.797	-231.895		9.64642e-05	-0.115458	-0.0593787	-0.0561762
4.20138	53_Benzene-AcNH2_NH-pi_1.05_dimer.out	-438.846	-440.731	-438.873	-440.846	-438.879	-440.881	-230.781	-231.818	-230.794	-231.877	-230.797	-231.895	-208.063	-208.906	-208.076	-208.963	-208.079	-208.98	-208.063	-208.907	-208.076	-208.963	-208.079	-208.98	-230.781	-231.818	-230.794	-231.877	-230.797	-231.895		6.6986e-05	-0.115488	-0.0593787	-0.0561762
3.94465	53_Benzene-AcNH2_NH-pi_1.10_dimer.out	-438.846	-440.731	-438.873	-440.846	-438.879	-440.881	-230.781	-231.818	-230.794	-231.877	-230.797	-231.895	-208.063	-208.906	-208.076	-208.963	-208.079	-208.98	-208.063	-208.907	-208.076	-208.963	-208.079	-208.98	-230.781	-231.818	-230.794	-231.877	-230.797	-231.895		8.33833e-05	-0.115472	-0.0593787	-0.0561762
2.95996	53_Benzene-AcNH2_NH-pi_1.25_dimer.out	-438.846	-440.729	-438.873	-440.845	-438.879	-440.879	-230.781	-231.818	-230.794	-231.877	-230.797	-231.895	-208.063	-208.906	-208.076	-208.963	-208.079	-208.98	-208.063	-208.907	-208.076	-208.963	-208.079	-208.98	-230.781	-231.818	-230.794	-231.877	-230.797	-231.895		0.00011113	-0.115444	-0.0593787	-0.0561762
1.64141	53_Benzene-AcNH2_NH-pi_1.50_dimer.out	-438.845	-440.727	-438.872	-440.843	-438.878	-440.877	-230.781	-231.818	-230.794	-231.877	-230.797	-231.895	-208.063	-208.906	-208.076	-208.963	-208.079	-208.98	-208.063	-208.906	-208.076	-208.963	-208.079	-208.98	-230.781	-231.818	-230.794	-231.877	-230.797	-231.895		7.39062e-05	-0.115481	-0.0593787	-0.0561762
0.480903	53_Benzene-AcNH2_NH-pi_2.00_dimer.out	-438.844	-440.725	-438.871	-440.841	-438.877	-440.876	-230.781	-231.818	-230.794	-231.877	-230.797	-231.895	-208.063	-208.906	-208.076	-208.963	-208.079	-208.98	-208.063	-208.906	-208.076	-208.963	-208.079	-208.98	-230.781	-231.818	-230.794	-231.877	-230.797	-231.895		3.79365e-05	-0.115517	-0.0593787	-0.0561762
2.74512	54_Benzene-Water_OH-pi_0.90_dimer.out	-306.84	-308.164	-306.858	-308.245	-306.863	-308.27	-230.781	-231.818	-230.794	-231.877	-230.797	-231.895	-76.0601	-76.3415	-76.0655	-76.3635	-76.0669	-76.3705	-76.0602	-76.3418	-76.0656	-76.3636	-76.0669	-76.3706	-230.781	-231.818	-230.794	-231.877	-230.797	-231.895		0.000133297	-0.0812609	-0.059384	-0.0220102
3.16118	54_Benzene-Water_OH-pi_0.95_dimer.out	-306.842	-308.165	-306.86	-308.246	-306.864	-308.27	-230.781	-231.818	-230.794	-231.877	-230.797	-231.895	-76.0601	-76.3415	-76.0655	-76.3635	-76.0669	-76.3705	-76.0602	-76.3418	-76.0656	-76.3636	-76.0669	-76.3706	-230.781	-231.818	-230.794	-231.877	-230.797	-231.895		0.000135027	-0.0812592	-0.059384	-0.0220102
3.22366	54_Benzene-Water_OH-pi_1.00_dimer.out	-306.843	-308.165	-306.861	-308.246	-306.866	-308.271	-230.781	-231.818	-230.794	-231.877	-230.797	-231.895	-76.0601	-76.3415	-76.0655	-76.3635	-76.0669	-76.3705	-76.0602	-76.3418	-76.0656	-76.3636	-76.0669	-76.3706	-230.781	-231.818	-230.794	-231.877	-230.797	-231.895		0.000113404	-0.0812808	-0.059384	-0.0220102
3.09425	54_Benzene-Water_OH-pi_1.05_dimer.out	-306.843	-308.164	-306.862	-308.246	-306.866	-308.27	-230.781	-231.818	-230.794	-231.877	-230.797	-231.895	-76.0601	-76.3415	-76.0655	-76.3635	-76.0669	-76.3705	-76.0602	-76.3417	-76.0656	-76.3636	-76.0669	-76.3706	-230.781	-231.818	-230.794	-231.877	-230.797	-231.895		7.87469e-05	-0.0813154	-0.059384	-0.0220102
2.87037	54_Benzene-Water_OH-pi_1.10_dimer.out	-306.844	-308.164	-306.862	-308.245	-306.866	-308.27	-230.781	-231.818	-230.794	-231.877	-230.797	-231.895	-76.0601	-76.3415	-76.0655	-76.3635	-76.0669	-76.3705	-76.0602	-76.3417	-76.0656	-76.3636	-76.0669	-76.3706	-230.781	-231.818	-230.794	-231.877	-230.797	-231.895		7.98814e-05	-0.0813143	-0.059384	-0.0220102
2.08886	54_Benzene-Water_OH-pi_1.25_dimer.out	-306.843	-308.163	-306.862	-308.244	-306.866	-308.269	-230.781	-231.818	-230.794	-231.877	-230.797	-231.895	-76.0601	-76.3415	-76.0655	-76.3635	-76.0669	-76.3705	-76.0601	-76.3416	-76.0656	-76.3636	-76.0669	-76.3706	-230.781	-231.818	-230.794	-231.877	-230.797	-231.895		8.9189e-05	-0.081305	-0.059384	-0.0220102
1.15401	54_Benzene-Water_OH-pi_1.50_dimer.out	-306.843	-308.161	-306.861	-308.243	-306.866	-308.267	-230.781	-231.818	-230.794	-231.877	-230.797	-231.895	-76.0601	-76.3415	-76.0655	-76.3635	-76.0669	-76.3705	-76.0601	-76.3416	-76.0655	-76.3635	-76.0669	-76.3706	-230.781	-231.818	-230.794	-231.877	-230.797	-231.895		3.80659e-05	-0.0813561	-0.059384	-0.0220102
0.417078	54_Benzene-Water_OH-pi_2.00_dimer.out	-306.842	-308.16	-306.861	-308.242	-306.865	-308.266	-230.781	-231.818	-230.794	-231.877	-230.797	-231.895	-76.0601	-76.3415	-76.0655	-76.3635	-76.0669	-76.3705	-76.0601	-76.3415	-76.0655	-76.3635	-76.0669	-76.3705	-230.781	-231.818	-230.794	-231.877	-230.797	-231.895		1.08736e-05	-0.0813833	-0.059384	-0.0220102
3.338	55_Benzene-MeOH_OH-pi_0.90_dimer.out	-345.868	-347.384	-345.889	-347.476	-345.894	-347.503	-230.781	-231.818	-230.794	-231.877	-230.797	-231.895	-115.092	-115.561	-115.099	-115.593	-115.101	-115.603	-115.092	-115.561	-115.1	-115.593	-115.101	-115.603	-230.781	-231.819	-230.794	-231.877	-230.797	-231.895		0.000139183	-0.0912824	-0.059381	-0.0320406
3.9499	55_Benzene-MeOH_OH-pi_0.95_dimer.out	-345.871	-347.385	-345.892	-347.477	-345.897	-347.504	-230.781	-231.818	-230.794	-231.877	-230.797	-231.895	-115.092	-115.561	-115.099	-115.593	-115.101	-115.603	-115.092	-115.561	-115.1	-115.593	-115.101	-115.603	-230.781	-231.818	-230.794	-231.877	-230.797	-231.895		0.000154917	-0.0912667	-0.059381	-0.0320406
4.10581	55_Benzene-MeOH_OH-pi_1.00_dimer.out	-345.873	-347.385	-345.894	-347.477	-345.898	-347.504	-230.781	-231.818	-230.794	-231.877	-230.797	-231.895	-115.092	-115.561	-115.099	-115.593	-115.101	-115.603	-115.092	-115.561	-115.1	-115.593	-115.101	-115.603	-230.781	-231.818	-230.794	-231.877	-230.797	-231.895		0.000100461	-0.0913211	-0.059381	-0.0320406
3.9982	55_Benzene-MeOH_OH-pi_1.05_dimer.out	-345.874	-347.385	-345.895	-347.477	-345.9	-347.504	-230.781	-231.818	-230.794	-231.877	-230.797	-231.895	-115.092	-115.561	-115.099	-115.593	-115.101	-115.603	-115.092	-115.561	-115.1	-115.593	-115.101	-115.603	-230.781	-231.818	-230.794	-231.877	-230.797	-231.895		4.95743e-05	-0.091372	-0.059381	-0.0320406
3.74932	55_Benzene-MeOH_OH-pi_1.10_dimer.out	-345.875	-347.385	-345.895	-347.476	-345.9	-347.504	-230.781	-231.818	-230.794	-231.877	-230.797	-231.895	-115.092	-115.561	-115.099	-115.593	-115.101	-115.603	-115.092	-115.561	-115.1	-115.593	-115.101	-115.603	-230.781	-231.818	-230.794	-231.877	-230.797	-231.895		6.97709e-05	-0.0913518	-0.059381	-0.0320406
2.77441	55_Benzene-MeOH_OH-pi_1.25_dimer.out	-345.875	-347.383	-345.896	-347.475	-345.901	-347.502	-230.781	-231.818	-230.794	-231.877	-230.797	-231.895	-115.092	-115.561	-115.099	-115.593	-115.101	-115.603	-115.092	-115.561	-115.099	-115.593	-115.101	-115.603	-230.781	-231.818	-230.794	-231.877	-230.797	-231.895		9.21809e-05	-0.0913294	-0.059381	-0.0320406
1.52391	55_Benzene-MeOH_OH-pi_1.50_dimer.out	-345.874	-347.381	-345.895	-347.473	-345.9	-347.5	-230.781	-231.818	-230.794	-231.877	-230.797	-231.895	-115.092	-115.561	-115.099	-115.593	-115.101	-115.603	-115.092	-115.561	-115.099	-115.593	-115.101	-115.603	-230.781	-231.818	-230.794	-231.877	-230.797	-231.895		6.5877e-05	-0.0913557	-0.059381	-0.0320406
0.518123	55_Benzene-MeOH_OH-pi_2.00_dimer.out	-345.874	-347.38	-345.894	-347.471	-345.899	-347.499	-230.781	-231.818	-230.794	-231.877	-230.797	-231.895	-115.092	-115.561	-115.099	-115.593	-115.101	-115.603	-115.092	-115.561	-115.099	-115.593	-115.101	-115.603	-230.781	-231.818	-230.794	-231.877	-230.797	-231.895		3.45347e-05	-0.091387	-0.059381	-0.0320406
2.38091	56_Benzene-MeNH2_NH-pi_0.90_dimer.out	-326.03	-327.526	-326.049	-327.612	-326.053	-327.638	-230.781	-231.818	-230.794	-231.877	-230.797	-231.895	-95.2551	-95.7046	-95.2613	-95.7311	-95.2627	-95.739	-95.2552	-95.7048	-95.2613	-95.7311	-95.2627	-95.739	-230.781	-231.818	-230.794	-231.877	-230.797	-231.895		9.79102e-05	-0.0857988	-0.0593916	-0.0265051
2.97661	56_Benzene-MeNH2_NH-pi_0.95_dimer.out	-326.033	-327.527	-326.052	-327.613	-326.056	-327.639	-230.781	-231.818	-230.794	-231.877	-230.797	-231.895	-95.2551	-95.7046	-95.2613	-95.7311	-95.2627	-95.739	-95.2552	-95.7048	-95.2613	-95.7311	-95.2627	-95.739	-230.781	-231.818	-230.794	-231.877	-230.797	-231.895		0.000109095	-0.0857876	-0.0593916	-0.0265051
3.13876	56_Benzene-MeNH2_NH-pi_1.00_dimer.out	-326.035	-327.527	-326.054	-327.613	-326.058	-327.639	-230.781	-231.818	-230.794	-231.877	-230.797	-231.895	-95.2551	-95.7046	-95.2613	-95.7311	-95.2627	-95.739	-95.2552	-95.7047	-95.2613	-95.7311	-95.2627	-95.739	-230.781	-231.818	-230.794	-231.877	-230.797	-231.895		3.47411e-05	-0.0858619	-0.0593916	-0.0265051
3.04387	56_Benzene-MeNH2_NH-pi_1.05_dimer.out	-326.036	-327.527	-326.055	-327.613	-326.06	-327.639	-230.781	-231.818	-230.794	-231.877	-230.797	-231.895	-95.2551	-95.7046	-95.2613	-95.7311	-95.2627	-95.739	-95.2552	-95.7047	-95.2613	-95.7311	-95.2627	-95.739	-230.781	-231.818	-230.794	-231.877	-230.797	-231.895		8.43319e-05	-0.0858123	-0.0593916	-0.0265051
2.80285	56_Benzene-MeNH2_NH-pi_1.10_dimer.out	-326.037	-327.527	-326.056	-327.613	-326.06	-327.638	-230.781	-231.818	-230.794	-231.877	-230.797	-231.895	-95.2551	-95.7046	-95.2613	-95.7311	-95.2627	-95.739	-95.2552	-95.7047	-95.2613	-95.7311	-95.2627	-95.739	-230.781	-231.818	-230.794	-231.877	-230.797	-231.895		8.69693e-05	-0.0858097	-0.0593916	-0.0265051
1.92243	56_Benzene-MeNH2_NH-pi_1.25_dimer.out	-326.037	-327.526	-326.057	-327.611	-326.061	-327.637	-230.781	-231.818	-230.794	-231.877	-230.797	-231.895	-95.2551	-95.7046	-95.2613	-95.7311	-95.2627	-95.739	-95.2552	-95.7046	-95.2613	-95.7311	-95.2627	-95.739	-230.781	-231.818	-230.794	-231.877	-230.797	-231.895		8.62526e-05	-0.0858104	-0.0593916	-0.0265051
0.93271	56_Benzene-MeNH2_NH-pi_1.50_dimer.out	-326.037	-327.524	-326.056	-327.61	-326.061	-327.635	-230.781	-231.818	-230.794	-231.877	-230.797	-231.895	-95.2551	-95.7046	-95.2613	-95.7311	-95.2627	-95.739	-95.2552	-95.7046	-95.2613	-95.7311	-95.2627	-95.739	-230.781	-231.818	-230.794	-231.877	-230.797	-231.895		4.54508e-05	-0.0858512	-0.0593916	-0.0265051
0.260262	56_Benzene-MeNH2_NH-pi_2.00_dimer.out	-326.036	-327.523	-326.056	-327.609	-326.06	-327.634	-230.781	-231.818	-230.794	-231.877	-230.797	-231.895	-95.2551	-95.7046	-95.2613	-95.7311	-95.2627	-95.739	-95.2551	-95.7046	-95.2613	-95.7311	-95.2627	-95.739	-230.781	-231.818	-230.794	-231.877	-230.797	-231.895		2.54298e-05	-0.0858712	-0.0593916	-0.0265051
3.59468	57_Benzene-Peptide_NH-pi_0.90_dimer.out	-477.874	-479.964	-477.903	-480.089	-477.909	-480.127	-230.781	-231.818	-230.794	-231.877	-230.797	-231.895	-247.102	-248.14	-247.118	-248.206	-247.122	-248.227	-247.102	-248.14	-247.118	-248.207	-247.122	-248.227	-230.781	-231.819	-230.794	-231.878	-230.797	-231.895		0.000350731	-0.125502	-0.059374	-0.0664784
4.82807	57_Benzene-Peptide_NH-pi_0.95_dimer.out	-477.88	-479.966	-477.908	-480.091	-477.915	-480.129	-230.781	-231.818	-230.794	-231.877	-230.797	-231.895	-247.102	-248.14	-247.118	-248.206	-247.122	-248.227	-247.102	-248.14	-247.118	-248.207	-247.122	-248.227	-230.781	-231.819	-230.794	-231.877	-230.797	-231.895		0.000306742	-0.125546	-0.059374	-0.0664784
5.17609	57_Benzene-Peptide_NH-pi_1.00_dimer.out	-477.883	-479.966	-477.911	-480.092	-477.918	-480.13	-230.781	-231.818	-230.794	-231.877	-230.797	-231.895	-247.102	-248.14	-247.118	-248.206	-247.122	-248.227	-247.102	-248.14	-247.118	-248.207	-247.122	-248.227	-230.781	-231.819	-230.794	-231.877	-230.797	-231.895		0.00026954	-0.125583	-0.059374	-0.0664784
5.0589	57_Benzene-Peptide_NH-pi_1.05_dimer.out	-477.884	-479.966	-477.913	-480.092	-477.919	-480.13	-230.781	-231.818	-230.794	-231.877	-230.797	-231.895	-247.102	-248.14	-247.118	-248.206	-247.122	-248.227	-247.102	-248.14	-247.118	-248.207	-247.122	-248.227	-230.781	-231.818	-230.794	-231.877	-230.797	-231.895		0.000176868	-0.125676	-0.059374	-0.0664784
4.71472	57_Benzene-Peptide_NH-pi_1.10_dimer.out	-477.885	-479.966	-477.914	-480.091	-477.92	-480.129	-230.781	-231.818	-230.794	-231.877	-230.797	-231.895	-247.102	-248.14	-247.118	-248.206	-247.122	-248.227	-247.102	-248.14	-247.118	-248.207	-247.122	-248.227	-230.781	-231.818	-230.794	-231.877	-230.797	-231.895		0.000190459	-0.125662	-0.059374	-0.0664784
3.38389	57_Benzene-Peptide_NH-pi_1.25_dimer.out	-477.886	-479.963	-477.915	-480.089	-477.921	-480.127	-230.781	-231.818	-230.794	-231.877	-230.797	-231.895	-247.102	-248.14	-247.118	-248.206	-247.122	-248.227	-247.102	-248.14	-247.118	-248.207	-247.122	-248.227	-230.781	-231.818	-230.794	-231.877	-230.797	-231.895		0.000180542	-0.125672	-0.059374	-0.0664784
1.79943	57_Benzene-Peptide_NH-pi_1.50_dimer.out	-477.885	-479.961	-477.914	-480.087	-477.921	-480.125	-230.781	-231.818	-230.794	-231.877	-230.797	-231.895	-247.102	-248.14	-247.118	-248.206	-247.122	-248.227	-247.102	-248.14	-247.118	-248.206	-247.122	-248.227	-230.781	-231.818	-230.794	-231.877	-230.797	-231.895		0.000114135	-0.125738	-0.059374	-0.0664784
0.619431	57_Benzene-Peptide_NH-pi_2.00_dimer.out	-477.884	-479.959	-477.913	-480.085	-477.92	-480.123	-230.781	-231.818	-230.794	-231.877	-230.797	-231.895	-247.102	-248.14	-247.118	-248.206	-247.122	-248.227	-247.102	-248.14	-247.118	-248.206	-247.122	-248.227	-230.781	-231.818	-230.794	-231.877	-230.797	-231.895		4.67399e-05	-0.125806	-0.059374	-0.0664784
2.88416	58_Pyridine-Pyridine_CH-N_0.90_dimer.out	-493.553	-495.697	-493.582	-495.823	-493.588	-495.861	-246.778	-247.847	-246.793	-247.909	-246.796	-247.928	-246.778	-247.847	-246.793	-247.909	-246.796	-247.928	-246.778	-247.847	-246.793	-247.909	-246.796	-247.928	-246.778	-247.847	-246.793	-247.909	-246.796	-247.928		4.97903e-05	-0.125572	-0.0628111	-0.0628111
3.86933	58_Pyridine-Pyridine_CH-N_0.95_dimer.out	-493.556	-495.699	-493.585	-495.825	-493.591	-495.862	-246.778	-247.847	-246.793	-247.909	-246.796	-247.928	-246.778	-247.847	-246.793	-247.909	-246.796	-247.928	-246.778	-247.847	-246.793	-247.909	-246.796	-247.928	-246.778	-247.847	-246.793	-247.909	-246.796	-247.928		6.3677e-05	-0.125558	-0.0628111	-0.0628111
4.16646	58_Pyridine-Pyridine_CH-N_1.00_dimer.out	-493.559	-495.7	-493.587	-495.825	-493.593	-495.863	-246.778	-247.847	-246.793	-247.909	-246.796	-247.928	-246.778	-247.847	-246.793	-247.909	-246.796	-247.928	-246.778	-247.847	-246.793	-247.909	-246.796	-247.928	-246.778	-247.847	-246.793	-247.909	-246.796	-247.928		8.59704e-05	-0.125536	-0.0628111	-0.0628111
3.88977	58_Pyridine-Pyridine_CH-N_1.05_dimer.out	-493.559	-495.699	-493.588	-495.825	-493.594	-495.862	-246.778	-247.847	-246.793	-247.909	-246.796	-247.928	-246.778	-247.847	-246.793	-247.909	-246.796	-247.928	-246.778	-247.847	-246.793	-247.909	-246.796	-247.928	-246.778	-247.847	-246.793	-247.909	-246.796	-247.928		0.000107949	-0.125514	-0.0628111	-0.0628111
3.44199	58_Pyridine-Pyridine_CH-N_1.10_dimer.out	-493.559	-495.699	-493.588	-495.824	-493.594	-495.862	-246.778	-247.847	-246.793	-247.909	-246.796	-247.928	-246.778	-247.847	-246.793	-247.909	-246.796	-247.928	-246.778	-247.847	-246.793	-247.909	-246.796	-247.928	-246.778	-247.847	-246.793	-247.909	-246.796	-247.928		0.000107165	-0.125515	-0.0628111	-0.0628111
2.17336	58_Pyridine-Pyridine_CH-N_1.25_dimer.out	-493.559	-495.697	-493.587	-495.822	-493.593	-495.86	-246.778	-247.847	-246.793	-247.909	-246.796	-247.928	-246.778	-247.847	-246.793	-247.909	-246.796	-247.928	-246.778	-247.847	-246.793	-247.909	-246.796	-247.928	-246.778	-247.847	-246.793	-247.909	-246.796	-247.928		0.000110543	-0.125512	-0.0628111	-0.0628111
1.00513	58_Pyridine-Pyridine_CH-N_1.50_dimer.out	-493.558	-495.695	-493.586	-495.82	-493.592	-495.858	-246.778	-247.847	-246.793	-247.909	-246.796	-247.928	-246.778	-247.847	-246.793	-247.909	-246.796	-247.928	-246.778	-247.847	-246.793	-247.909	-246.796	-247.928	-246.778	-247.847	-246.793	-247.909	-246.796	-247.928		7.89602e-05	-0.125543	-0.0628111	-0.0628111
0.274043	58_Pyridine-Pyridine_CH-N_2.00_dimer.out	-493.557	-495.693	-493.586	-495.819	-493.592	-495.857	-246.778	-247.847	-246.793	-247.909	-246.796	-247.928	-246.778	-247.847	-246.793	-247.909	-246.796	-247.928	-246.778	-247.847	-246.793	-247.909	-246.796	-247.928	-246.778	-247.847	-246.793	-247.909	-246.796	-247.928		1.0789e-05	-0.125611	-0.0628111	-0.0628111
2.60366	59_Ethyne-Water_CH-O_0.90_dimer.out	-152.912	-153.537	-152.922	-153.579	-152.924	-153.591	-76.8487	-77.1915	-76.8533	-77.2111	-76.8543	-77.2167	-76.0603	-76.3415	-76.0658	-76.3636	-76.0671	-76.3706	-76.0604	-76.3418	-76.0658	-76.3637	-76.0671	-76.3706	-76.8488	-77.1916	-76.8533	-77.2111	-76.8543	-77.2168		-1.30694e-05	-0.0415835	-0.0195491	-0.0220213
2.86494	59_Ethyne-Water_CH-O_0.95_dimer.out	-152.912	-153.538	-152.922	-153.579	-152.925	-153.592	-76.8487	-77.1915	-76.8533	-77.2111	-76.8543	-77.2167	-76.0603	-76.3415	-76.0658	-76.3636	-76.0671	-76.3706	-76.0604	-76.3417	-76.0658	-76.3636	-76.0671	-76.3706	-76.8488	-77.1916	-76.8533	-77.2111	-76.8543	-77.2167		-2.12264e-05	-0.0415917	-0.0195491	-0.0220213
2.89872	59_Ethyne-Water_CH-O_1.00_dimer.out	-152.913	-153.538	-152.923	-153.579	-152.925	-153.592	-76.8487	-77.1915	-76.8533	-77.2111	-76.8543	-77.2167	-76.0603	-76.3415	-76.0658	-76.3636	-76.0671	-76.3706	-76.0604	-76.3417	-76.0658	-76.3636	-76.0671	-76.3706	-76.8488	-77.1916	-76.8533	-77.2111	-76.8543	-77.2167		2.41616e-06	-0.041568	-0.0195491	-0.0220213
2.79927	59_Ethyne-Water_CH-O_1.05_dimer.out	-152.913	-153.538	-152.923	-153.579	-152.925	-153.592	-76.8487	-77.1915	-76.8533	-77.2111	-76.8543	-77.2167	-76.0603	-76.3415	-76.0658	-76.3636	-76.0671	-76.3706	-76.0604	-76.3417	-76.0658	-76.3636	-76.0671	-76.3706	-76.8488	-77.1916	-76.8533	-77.2111	-76.8543	-77.2167		2.29198e-05	-0.0415475	-0.0195491	-0.0220213
2.62788	59_Ethyne-Water_CH-O_1.10_dimer.out	-152.913	-153.537	-152.923	-153.579	-152.925	-153.592	-76.8487	-77.1915	-76.8533	-77.2111	-76.8543	-77.2167	-76.0603	-76.3415	-76.0658	-76.3636	-76.0671	-76.3706	-76.0604	-76.3417	-76.0658	-76.3636	-76.0671	-76.3706	-76.8488	-77.1916	-76.8533	-77.2111	-76.8543	-77.2167		3.72369e-05	-0.0415332	-0.0195491	-0.0220213
1.99931	59_Ethyne-Water_CH-O_1.25_dimer.out	-152.912	-153.536	-152.922	-153.578	-152.924	-153.591	-76.8487	-77.1915	-76.8533	-77.2111	-76.8543	-77.2167	-76.0603	-76.3415	-76.0658	-76.3636	-76.0671	-76.3706	-76.0603	-76.3416	-76.0658	-76.3636	-76.0671	-76.3706	-76.8487	-77.1916	-76.8533	-77.2111	-76.8543	-77.2167		4.41588e-05	-0.0415263	-0.0195491	-0.0220213
1.17815	59_Ethyne-Water_CH-O_1.50_dimer.out	-152.911	-153.535	-152.921	-153.577	-152.923	-153.589	-76.8487	-77.1915	-76.8533	-77.2111	-76.8543	-77.2167	-76.0603	-76.3415	-76.0658	-76.3636	-76.0671	-76.3706	-76.0603	-76.3416	-76.0658	-76.3636	-76.0671	-76.3706	-76.8487	-77.1916	-76.8533	-77.2111	-76.8543	-77.2167		6.23358e-05	-0.0415081	-0.0195491	-0.0220213
0.461297	59_Ethyne-Water_CH-O_2.00_dimer.out	-152.91	-153.534	-152.92	-153.575	-152.922	-153.588	-76.8487	-77.1915	-76.8533	-77.2111	-76.8543	-77.2167	-76.0603	-76.3415	-76.0658	-76.3636	-76.0671	-76.3706	-76.0603	-76.3416	-76.0658	-76.3636	-76.0671	-76.3706	-76.8487	-77.1915	-76.8533	-77.2111	-76.8543	-77.2167		4.66262e-05	-0.0415238	-0.0195491	-0.0220213
4.30609	60_Ethyne-AcOH_OH-pi_0.90_dimer.out	-304.755	-305.968	-304.775	-306.049	-304.779	-306.074	-76.8486	-77.1915	-76.8532	-77.211	-76.8542	-77.2167	-227.905	-228.77	-227.92	-228.831	-227.923	-228.851	-227.905	-228.77	-227.92	-228.831	-227.923	-228.851	-76.8487	-77.1918	-76.8532	-77.2111	-76.8542	-77.2167		-0.000100827	-0.0810031	-0.01954	-0.0613623
4.7866	60_Ethyne-AcOH_OH-pi_0.95_dimer.out	-304.757	-305.969	-304.776	-306.05	-304.781	-306.075	-76.8486	-77.1915	-76.8532	-77.211	-76.8542	-77.2167	-227.905	-228.77	-227.92	-228.831	-227.923	-228.851	-227.905	-228.77	-227.92	-228.831	-227.923	-228.851	-76.8487	-77.1918	-76.8532	-77.2111	-76.8542	-77.2167		-5.68028e-05	-0.0809591	-0.01954	-0.0613623
4.85415	60_Ethyne-AcOH_OH-pi_1.00_dimer.out	-304.758	-305.969	-304.777	-306.05	-304.782	-306.075	-76.8486	-77.1915	-76.8532	-77.211	-76.8542	-77.2167	-227.905	-228.77	-227.92	-228.831	-227.923	-228.851	-227.905	-228.77	-227.92	-228.831	-227.923	-228.851	-76.8487	-77.1917	-76.8532	-77.211	-76.8542	-77.2167		-2.51648e-05	-0.0809275	-0.01954	-0.0613623
4.67874	60_Ethyne-AcOH_OH-pi_1.05_dimer.out	-304.758	-305.969	-304.778	-306.05	-304.782	-306.075	-76.8486	-77.1915	-76.8532	-77.211	-76.8542	-77.2167	-227.905	-228.77	-227.92	-228.831	-227.923	-228.851	-227.905	-228.77	-227.92	-228.831	-227.923	-228.851	-76.8487	-77.1917	-76.8532	-77.211	-76.8542	-77.2167		-2.0913e-05	-0.0809232	-0.01954	-0.0613623
4.37113	60_Ethyne-AcOH_OH-pi_1.10_dimer.out	-304.758	-305.968	-304.778	-306.049	-304.782	-306.074	-76.8486	-77.1915	-76.8532	-77.211	-76.8542	-77.2167	-227.905	-228.77	-227.92	-228.831	-227.923	-228.851	-227.905	-228.77	-227.92	-228.831	-227.923	-228.851	-76.8487	-77.1917	-76.8532	-77.2111	-76.8542	-77.2167		-1.09143e-05	-0.0809132	-0.01954	-0.0613623
3.23436	60_Ethyne-AcOH_OH-pi_1.25_dimer.out	-304.758	-305.967	-304.777	-306.047	-304.782	-306.072	-76.8486	-77.1915	-76.8532	-77.211	-76.8542	-77.2167	-227.905	-228.77	-227.92	-228.831	-227.923	-228.851	-227.905	-228.77	-227.92	-228.831	-227.923	-228.851	-76.8487	-77.1916	-76.8532	-77.211	-76.8542	-77.2167		1.34459e-05	-0.0808889	-0.01954	-0.0613623
1.76008	60_Ethyne-AcOH_OH-pi_1.50_dimer.out	-304.756	-305.964	-304.775	-306.045	-304.78	-306.07	-76.8486	-77.1915	-76.8532	-77.211	-76.8542	-77.2167	-227.905	-228.77	-227.92	-228.831	-227.923	-228.851	-227.905	-228.77	-227.92	-228.831	-227.923	-228.851	-76.8486	-77.1915	-76.8532	-77.211	-76.8542	-77.2167		4.88114e-05	-0.0808535	-0.01954	-0.0613623
0.555852	60_Ethyne-AcOH_OH-pi_2.00_dimer.out	-304.754	-305.962	-304.774	-306.043	-304.778	-306.068	-76.8486	-77.1915	-76.8532	-77.211	-76.8542	-77.2167	-227.905	-228.77	-227.92	-228.831	-227.923	-228.851	-227.905	-228.77	-227.92	-228.831	-227.923	-228.851	-76.8486	-77.1915	-76.8532	-77.211	-76.8542	-77.2167		2.79638e-05	-0.0808743	-0.01954	-0.0613623
2.62929	61_Pentane-AcOH_0.90_dimer.out	-424.303	-426.178	-424.33	-426.292	-424.337	-426.328	-196.404	-197.403	-196.416	-197.457	-196.419	-197.473	-227.905	-228.77	-227.92	-228.831	-227.923	-228.851	-227.905	-228.77	-227.92	-228.832	-227.923	-228.851	-196.404	-197.404	-196.416	-197.457	-196.419	-197.473		2.15432e-05	-0.114869	-0.053511	-0.06138
2.83503	61_Pentane-AcOH_0.95_dimer.out	-424.305	-426.178	-424.332	-426.293	-424.339	-426.328	-196.404	-197.403	-196.416	-197.457	-196.419	-197.473	-227.905	-228.77	-227.92	-228.831	-227.923	-228.851	-227.905	-228.77	-227.92	-228.832	-227.923	-228.851	-196.404	-197.404	-196.416	-197.457	-196.419	-197.473		4.18848e-05	-0.114849	-0.053511	-0.06138
2.8197	61_Pentane-AcOH_1.00_dimer.out	-424.307	-426.178	-424.334	-426.293	-424.34	-426.328	-196.404	-197.403	-196.416	-197.457	-196.419	-197.473	-227.905	-228.77	-227.92	-228.831	-227.923	-228.851	-227.905	-228.77	-227.92	-228.831	-227.923	-228.851	-196.404	-197.404	-196.416	-197.457	-196.419	-197.473		5.79543e-05	-0.114833	-0.053511	-0.06138
2.67689	61_Pentane-AcOH_1.05_dimer.out	-424.308	-426.178	-424.334	-426.293	-424.341	-426.328	-196.404	-197.403	-196.416	-197.457	-196.419	-197.473	-227.905	-228.77	-227.92	-228.831	-227.923	-228.851	-227.905	-228.77	-227.92	-228.831	-227.923	-228.851	-196.404	-197.404	-196.416	-197.457	-196.419	-197.473		7.9781e-05	-0.114811	-0.053511	-0.06138
2.46742	61_Pentane-AcOH_1.10_dimer.out	-424.308	-426.177	-424.335	-426.292	-424.341	-426.327	-196.404	-197.403	-196.416	-197.457	-196.419	-197.473	-227.905	-228.77	-227.92	-228.831	-227.923	-228.851	-227.905	-228.77	-227.92	-228.831	-227.923	-228.851	-196.404	-197.404	-196.416	-197.457	-196.419	-197.473		8.12387e-05	-0.11481	-0.053511	-0.06138
1.75749	61_Pentane-AcOH_1.25_dimer.out	-424.309	-426.176	-424.336	-426.291	-424.342	-426.326	-196.404	-197.403	-196.416	-197.457	-196.419	-197.473	-227.905	-228.77	-227.92	-228.831	-227.923	-228.851	-227.905	-228.77	-227.92	-228.831	-227.923	-228.851	-196.404	-197.404	-196.416	-197.457	-196.419	-197.473		9.10262e-05	-0.1148	-0.053511	-0.06138
0.772646	61_Pentane-AcOH_1.50_dimer.out	-424.309	-426.175	-424.336	-426.29	-424.342	-426.325	-196.404	-197.403	-196.416	-197.457	-196.419	-197.473	-227.905	-228.77	-227.92	-228.831	-227.923	-228.851	-227.905	-228.77	-227.92	-228.831	-227.923	-228.851	-196.404	-197.403	-196.416	-197.457	-196.419	-197.473		4.91054e-05	-0.114842	-0.053511	-0.06138
0.165994	61_Pentane-AcOH_2.00_dimer.out	-424.309	-426.174	-424.336	-426.289	-424.342	-426.324	-196.404	-197.403	-196.416	-197.457	-196.419	-197.473	-227.905	-228.77	-227.92	-228.831	-227.923	-228.851	-227.905	-228.77	-227.92	-228.831	-227.923	-228.851	-196.404	-197.403	-196.416	-197.457	-196.419	-197.473		2.16501e-05	-0.114869	-0.053511	-0.06138
3.07359	62_Pentane-AcNH2_0.90_dimer.out	-404.46	-406.315	-404.485	-406.424	-404.491	-406.458	-196.404	-197.403	-196.416	-197.457	-196.419	-197.473	-208.063	-208.906	-208.076	-208.963	-208.079	-208.98	-208.063	-208.907	-208.076	-208.963	-208.079	-208.98	-196.404	-197.404	-196.416	-197.457	-196.419	-197.473		-3.61679e-05	-0.109726	-0.0535079	-0.0561822
3.42638	62_Pentane-AcNH2_0.95_dimer.out	-404.463	-406.315	-404.488	-406.425	-404.494	-406.458	-196.404	-197.403	-196.416	-197.457	-196.419	-197.473	-208.063	-208.906	-208.076	-208.963	-208.079	-208.98	-208.063	-208.907	-208.076	-208.963	-208.079	-208.98	-196.404	-197.404	-196.416	-197.457	-196.419	-197.473		-1.43412e-05	-0.109704	-0.0535079	-0.0561822
3.43722	62_Pentane-AcNH2_1.00_dimer.out	-404.464	-406.315	-404.49	-406.425	-404.496	-406.458	-196.404	-197.403	-196.416	-197.457	-196.419	-197.473	-208.063	-208.906	-208.076	-208.963	-208.079	-208.98	-208.063	-208.907	-208.076	-208.963	-208.079	-208.98	-196.404	-197.404	-196.416	-197.457	-196.419	-197.473		4.23225e-06	-0.109686	-0.0535079	-0.0561822
3.25919	62_Pentane-AcNH2_1.05_dimer.out	-404.465	-406.315	-404.491	-406.425	-404.497	-406.458	-196.404	-197.403	-196.416	-197.457	-196.419	-197.473	-208.063	-208.906	-208.076	-208.963	-208.079	-208.98	-208.063	-208.907	-208.076	-208.963	-208.079	-208.98	-196.404	-197.404	-196.416	-197.457	-196.419	-197.473		8.37345e-06	-0.109682	-0.0535079	-0.0561822
2.98775	62_Pentane-AcNH2_1.10_dimer.out	-404.466	-406.315	-404.492	-406.424	-404.497	-406.458	-196.404	-197.403	-196.416	-197.457	-196.419	-197.473	-208.063	-208.906	-208.076	-208.963	-208.079	-208.98	-208.063	-208.907	-208.076	-208.963	-208.079	-208.98	-196.404	-197.404	-196.416	-197.457	-196.419	-197.473		3.44937e-05	-0.109656	-0.0535079	-0.0561822
2.07844	62_Pentane-AcNH2_1.25_dimer.out	-404.467	-406.313	-404.492	-406.423	-404.498	-406.456	-196.404	-197.403	-196.416	-197.457	-196.419	-197.473	-208.063	-208.906	-208.076	-208.963	-208.079	-208.98	-208.063	-208.907	-208.076	-208.963	-208.079	-208.98	-196.404	-197.404	-196.416	-197.457	-196.419	-197.473		6.01274e-05	-0.10963	-0.0535079	-0.0561822
1.02451	62_Pentane-AcNH2_1.50_dimer.out	-404.467	-406.312	-404.493	-406.421	-404.498	-406.454	-196.404	-197.403	-196.416	-197.457	-196.419	-197.473	-208.063	-208.906	-208.076	-208.963	-208.079	-208.98	-208.063	-208.907	-208.076	-208.963	-208.079	-208.98	-196.404	-197.403	-196.416	-197.457	-196.419	-197.473		4.0862e-05	-0.109649	-0.0535079	-0.0561822
0.268049	62_Pentane-AcNH2_2.00_dimer.out	-404.467	-406.31	-404.492	-406.42	-404.498	-406.453	-196.404	-197.403	-196.416	-197.457	-196.419	-197.473	-208.063	-208.906	-208.076	-208.963	-208.079	-208.98	-208.063	-208.907	-208.076	-208.963	-208.079	-208.98	-196.404	-197.403	-196.416	-197.457	-196.419	-197.473		2.05029e-05	-0.10967	-0.0535079	-0.0561822
2.54659	63_Benzene-AcOH_0.90_dimer.out	-458.678	-460.592	-458.706	-460.713	-458.712	-460.749	-230.781	-231.818	-230.794	-231.877	-230.797	-231.895	-227.905	-228.77	-227.92	-228.831	-227.923	-228.851	-227.905	-228.77	-227.92	-228.831	-227.923	-228.851	-230.781	-231.819	-230.794	-231.877	-230.797	-231.895		0.000263104	-0.120497	-0.0593909	-0.0613689
3.44386	63_Benzene-AcOH_0.95_dimer.out	-458.682	-460.593	-458.71	-460.714	-458.716	-460.751	-230.781	-231.818	-230.794	-231.877	-230.797	-231.895	-227.905	-228.77	-227.92	-228.831	-227.923	-228.851	-227.905	-228.77	-227.92	-228.831	-227.923	-228.851	-230.781	-231.818	-230.794	-231.877	-230.797	-231.895		0.000156878	-0.120603	-0.0593909	-0.0613689
3.67136	63_Benzene-AcOH_1.00_dimer.out	-458.684	-460.594	-458.712	-460.714	-458.719	-460.751	-230.781	-231.818	-230.794	-231.877	-230.797	-231.895	-227.905	-228.77	-227.92	-228.831	-227.923	-228.851	-227.905	-228.77	-227.92	-228.831	-227.923	-228.851	-230.781	-231.818	-230.794	-231.877	-230.797	-231.895		0.000170425	-0.120589	-0.0593909	-0.0613689
3.54622	63_Benzene-AcOH_1.05_dimer.out	-458.686	-460.594	-458.714	-460.714	-458.72	-460.751	-230.781	-231.818	-230.794	-231.877	-230.797	-231.895	-227.905	-228.77	-227.92	-228.831	-227.923	-228.851	-227.905	-228.77	-227.92	-228.831	-227.923	-228.851	-230.781	-231.818	-230.794	-231.877	-230.797	-231.895		0.00021295	-0.120547	-0.0593909	-0.0613689
3.25335	63_Benzene-AcOH_1.10_dimer.out	-458.686	-460.593	-458.715	-460.714	-458.721	-460.751	-230.781	-231.818	-230.794	-231.877	-230.797	-231.895	-227.905	-228.77	-227.92	-228.831	-227.923	-228.851	-227.905	-228.77	-227.92	-228.831	-227.923	-228.851	-230.781	-231.818	-230.794	-231.877	-230.797	-231.895		0.000229709	-0.12053	-0.0593909	-0.0613689
2.19512	63_Benzene-AcOH_1.25_dimer.out	-458.687	-460.592	-458.715	-460.712	-458.721	-460.749	-230.781	-231.818	-230.794	-231.877	-230.797	-231.895	-227.905	-228.77	-227.92	-228.831	-227.923	-228.851	-227.905	-228.77	-227.92	-228.831	-227.923	-228.851	-230.781	-231.818	-230.794	-231.877	-230.797	-231.895		0.000206049	-0.120554	-0.0593909	-0.0613689
1.00733	63_Benzene-AcOH_1.50_dimer.out	-458.687	-460.59	-458.715	-460.71	-458.721	-460.747	-230.781	-231.818	-230.794	-231.877	-230.797	-231.895	-227.905	-228.77	-227.92	-228.831	-227.923	-228.851	-227.905	-228.77	-227.92	-228.831	-227.923	-228.851	-230.781	-231.818	-230.794	-231.877	-230.797	-231.895		9.39155e-05	-0.120666	-0.0593909	-0.0613689
0.258702	63_Benzene-AcOH_2.00_dimer.out	-458.686	-460.588	-458.714	-460.709	-458.721	-460.746	-230.781	-231.818	-230.794	-231.877	-230.797	-231.895	-227.905	-228.77	-227.92	-228.831	-227.923	-228.851	-227.905	-228.77	-227.92	-228.831	-227.923	-228.851	-230.781	-231.818	-230.794	-231.877	-230.797	-231.895		5.4622e-05	-0.120705	-0.0593909	-0.0613689
2.52687	64_Peptide-Ethene_0.90_dimer.out	-325.163	-326.587	-325.184	-326.674	-325.188	-326.7	-247.103	-248.14	-247.118	-248.207	-247.122	-248.227	-78.0645	-78.4427	-78.0693	-78.4635	-78.0704	-78.4696	-78.0645	-78.4429	-78.0693	-78.4636	-78.0705	-78.4696	-247.103	-248.14	-247.118	-248.207	-247.122	-248.227		-8.32506e-05	-0.0874199	-0.0664797	-0.020857
2.88149	64_Peptide-Ethene_0.95_dimer.out	-325.165	-326.587	-325.186	-326.675	-325.19	-326.701	-247.103	-248.14	-247.118	-248.207	-247.122	-248.227	-78.0645	-78.4427	-78.0693	-78.4635	-78.0704	-78.4696	-78.0645	-78.4428	-78.0693	-78.4636	-78.0705	-78.4696	-247.103	-248.14	-247.118	-248.207	-247.122	-248.227		-3.25716e-05	-0.0873692	-0.0664797	-0.020857
2.9279	64_Peptide-Ethene_1.00_dimer.out	-325.167	-326.587	-325.187	-326.675	-325.192	-326.701	-247.103	-248.14	-247.118	-248.207	-247.122	-248.227	-78.0645	-78.4427	-78.0693	-78.4635	-78.0704	-78.4696	-78.0645	-78.4428	-78.0693	-78.4636	-78.0705	-78.4696	-247.103	-248.14	-247.118	-248.207	-247.122	-248.227		3.75194e-06	-0.0873329	-0.0664797	-0.020857
2.80104	64_Peptide-Ethene_1.05_dimer.out	-325.167	-326.587	-325.188	-326.674	-325.192	-326.701	-247.103	-248.14	-247.118	-248.207	-247.122	-248.227	-78.0645	-78.4427	-78.0693	-78.4635	-78.0704	-78.4696	-78.0645	-78.4428	-78.0693	-78.4635	-78.0705	-78.4696	-247.103	-248.14	-247.118	-248.207	-247.122	-248.227		7.8122e-06	-0.0873288	-0.0664797	-0.020857
2.58541	64_Peptide-Ethene_1.10_dimer.out	-325.168	-326.587	-325.188	-326.674	-325.193	-326.701	-247.103	-248.14	-247.118	-248.207	-247.122	-248.227	-78.0645	-78.4427	-78.0693	-78.4635	-78.0704	-78.4696	-78.0645	-78.4428	-78.0693	-78.4635	-78.0705	-78.4696	-247.103	-248.14	-247.118	-248.207	-247.122	-248.227		3.02157e-05	-0.0873064	-0.0664797	-0.020857
1.8281	64_Peptide-Ethene_1.25_dimer.out	-325.168	-326.586	-325.189	-326.673	-325.193	-326.699	-247.103	-248.14	-247.118	-248.207	-247.122	-248.227	-78.0645	-78.4427	-78.0693	-78.4635	-78.0704	-78.4696	-78.0645	-78.4428	-78.0693	-78.4635	-78.0705	-78.4696	-247.103	-248.14	-247.118	-248.207	-247.122	-248.227		3.93631e-05	-0.0872973	-0.0664797	-0.020857
0.866895	64_Peptide-Ethene_1.50_dimer.out	-325.168	-326.584	-325.188	-326.671	-325.193	-326.698	-247.103	-248.14	-247.118	-248.207	-247.122	-248.227	-78.0645	-78.4427	-78.0693	-78.4635	-78.0704	-78.4696	-78.0645	-78.4427	-78.0693	-78.4635	-78.0704	-78.4696	-247.103	-248.14	-247.118	-248.207	-247.122	-248.227		4.17852e-05	-0.0872948	-0.0664797	-0.020857
0.187642	64_Peptide-Ethene_2.00_dimer.out	-325.167	-326.583	-325.188	-326.67	-325.192	-326.697	-247.103	-248.14	-247.118	-248.207	-247.122	-248.227	-78.0645	-78.4427	-78.0693	-78.4635	-78.0704	-78.4696	-78.0645	-78.4427	-78.0693	-78.4635	-78.0704	-78.4696	-247.103	-248.14	-247.118	-248.207	-247.122	-248.227		8.87376e-06	-0.0873278	-0.0664797	-0.020857
3.66054	65_Pyridine-Ethyne_0.90_dimer.out	-323.63	-325.044	-323.648	-325.126	-323.652	-325.151	-246.779	-247.847	-246.793	-247.909	-246.796	-247.928	-76.8485	-77.1915	-76.8531	-77.211	-76.8541	-77.2167	-76.8486	-77.1917	-76.8531	-77.2111	-76.8541	-77.2167	-246.779	-247.847	-246.793	-247.909	-246.796	-247.928		6.05799e-05	-0.0823127	-0.0628431	-0.0195302
4.00764	65_Pyridine-Ethyne_0.95_dimer.out	-323.631	-325.044	-323.649	-325.127	-323.653	-325.151	-246.779	-247.847	-246.793	-247.909	-246.796	-247.928	-76.8485	-77.1915	-76.8531	-77.211	-76.8541	-77.2167	-76.8486	-77.1917	-76.8531	-77.2111	-76.8541	-77.2167	-246.779	-247.847	-246.793	-247.909	-246.796	-247.928		8.18298e-05	-0.0822914	-0.0628431	-0.0195302
4.06567	65_Pyridine-Ethyne_1.00_dimer.out	-323.631	-325.044	-323.65	-325.127	-323.654	-325.151	-246.779	-247.847	-246.793	-247.909	-246.796	-247.928	-76.8485	-77.1915	-76.8531	-77.211	-76.8541	-77.2167	-76.8486	-77.1917	-76.8531	-77.2111	-76.8541	-77.2167	-246.779	-247.847	-246.793	-247.909	-246.796	-247.928		8.8983e-05	-0.0822843	-0.0628431	-0.0195302
3.94577	65_Pyridine-Ethyne_1.05_dimer.out	-323.631	-325.044	-323.65	-325.127	-323.654	-325.151	-246.779	-247.847	-246.793	-247.909	-246.796	-247.928	-76.8485	-77.1915	-76.8531	-77.211	-76.8541	-77.2167	-76.8486	-77.1917	-76.8531	-77.2111	-76.8541	-77.2167	-246.779	-247.847	-246.793	-247.909	-246.796	-247.928		9.8611e-05	-0.0822747	-0.0628431	-0.0195302
3.72406	65_Pyridine-Ethyne_1.10_dimer.out	-323.631	-325.044	-323.65	-325.126	-323.654	-325.151	-246.779	-247.847	-246.793	-247.909	-246.796	-247.928	-76.8485	-77.1915	-76.8531	-77.211	-76.8541	-77.2167	-76.8486	-77.1916	-76.8531	-77.2111	-76.8541	-77.2167	-246.779	-247.847	-246.793	-247.909	-246.796	-247.928		0.000105676	-0.0822676	-0.0628431	-0.0195302
2.8661	65_Pyridine-Ethyne_1.25_dimer.out	-323.631	-325.043	-323.65	-325.125	-323.654	-325.149	-246.779	-247.847	-246.793	-247.909	-246.796	-247.928	-76.8485	-77.1915	-76.8531	-77.211	-76.8541	-77.2167	-76.8486	-77.1916	-76.8531	-77.211	-76.8541	-77.2167	-246.779	-247.847	-246.793	-247.909	-246.796	-247.928		9.79565e-05	-0.0822753	-0.0628431	-0.0195302
1.67923	65_Pyridine-Ethyne_1.50_dimer.out	-323.629	-325.041	-323.648	-325.123	-323.652	-325.148	-246.779	-247.847	-246.793	-247.909	-246.796	-247.928	-76.8485	-77.1915	-76.8531	-77.211	-76.8541	-77.2167	-76.8486	-77.1916	-76.8531	-77.211	-76.8541	-77.2167	-246.779	-247.847	-246.793	-247.909	-246.796	-247.928		7.49649e-05	-0.0822983	-0.0628431	-0.0195302
0.618433	65_Pyridine-Ethyne_2.00_dimer.out	-323.628	-325.039	-323.647	-325.121	-323.651	-325.146	-246.779	-247.847	-246.793	-247.909	-246.796	-247.928	-76.8485	-77.1915	-76.8531	-77.211	-76.8541	-77.2167	-76.8485	-77.1915	-76.8531	-77.211	-76.8541	-77.2167	-246.779	-247.847	-246.793	-247.909	-246.796	-247.928		2.63549e-05	-0.0823469	-0.0628431	-0.0195302
3.35962	66_MeNH2-Pyridine_0.90_dimer.out	-342.029	-343.556	-342.05	-343.646	-342.054	-343.672	-95.2551	-95.7046	-95.2613	-95.7311	-95.2627	-95.739	-246.778	-247.847	-246.793	-247.909	-246.796	-247.928	-246.779	-247.847	-246.793	-247.909	-246.796	-247.928	-95.2552	-95.7048	-95.2613	-95.7311	-95.2627	-95.739		-4.94844e-05	-0.0893845	-0.0265033	-0.0628317
3.79562	66_MeNH2-Pyridine_0.95_dimer.out	-342.032	-343.557	-342.052	-343.646	-342.056	-343.673	-95.2551	-95.7046	-95.2613	-95.7311	-95.2627	-95.739	-246.778	-247.847	-246.793	-247.909	-246.796	-247.928	-246.779	-247.847	-246.793	-247.909	-246.796	-247.928	-95.2552	-95.7047	-95.2613	-95.7311	-95.2627	-95.739		-2.74495e-05	-0.0893624	-0.0265033	-0.0628317
3.89254	66_MeNH2-Pyridine_1.00_dimer.out	-342.033	-343.557	-342.054	-343.646	-342.058	-343.673	-95.2551	-95.7046	-95.2613	-95.7311	-95.2627	-95.739	-246.778	-247.847	-246.793	-247.909	-246.796	-247.928	-246.779	-247.847	-246.793	-247.909	-246.796	-247.928	-95.2552	-95.7047	-95.2613	-95.7311	-95.2627	-95.739		1.6259e-05	-0.0893187	-0.0265033	-0.0628317
3.78432	66_MeNH2-Pyridine_1.05_dimer.out	-342.034	-343.557	-342.054	-343.646	-342.059	-343.673	-95.2551	-95.7046	-95.2613	-95.7311	-95.2627	-95.739	-246.778	-247.847	-246.793	-247.909	-246.796	-247.928	-246.779	-247.847	-246.793	-247.909	-246.796	-247.928	-95.2552	-95.7047	-95.2613	-95.7311	-95.2627	-95.739		4.914e-05	-0.0892858	-0.0265033	-0.0628317
3.56039	66_MeNH2-Pyridine_1.10_dimer.out	-342.035	-343.557	-342.055	-343.646	-342.06	-343.673	-95.2551	-95.7046	-95.2613	-95.7311	-95.2627	-95.739	-246.778	-247.847	-246.793	-247.909	-246.796	-247.928	-246.779	-247.847	-246.793	-247.909	-246.796	-247.928	-95.2552	-95.7047	-95.2613	-95.7311	-95.2627	-95.739		7.20522e-05	-0.0892629	-0.0265033	-0.0628317
2.67699	66_MeNH2-Pyridine_1.25_dimer.out	-342.035	-343.555	-342.056	-343.645	-342.06	-343.671	-95.2551	-95.7046	-95.2613	-95.7311	-95.2627	-95.739	-246.778	-247.847	-246.793	-247.909	-246.796	-247.928	-246.778	-247.847	-246.793	-247.909	-246.796	-247.928	-95.2552	-95.7046	-95.2613	-95.7311	-95.2627	-95.739		6.15463e-05	-0.0892734	-0.0265033	-0.0628317
1.4875	66_MeNH2-Pyridine_1.50_dimer.out	-342.035	-343.553	-342.055	-343.643	-342.06	-343.67	-95.2551	-95.7046	-95.2613	-95.7311	-95.2627	-95.739	-246.778	-247.847	-246.793	-247.909	-246.796	-247.928	-246.778	-247.847	-246.793	-247.909	-246.796	-247.928	-95.2552	-95.7046	-95.2613	-95.7311	-95.2627	-95.739		6.65823e-05	-0.0892684	-0.0265033	-0.0628317
0.490416	66_MeNH2-Pyridine_2.00_dimer.out	-342.034	-343.552	-342.055	-343.641	-342.059	-343.668	-95.2551	-95.7046	-95.2613	-95.7311	-95.2627	-95.739	-246.778	-247.847	-246.793	-247.909	-246.796	-247.928	-246.778	-247.847	-246.793	-247.909	-246.796	-247.928	-95.2551	-95.7046	-95.2613	-95.7311	-95.2627	-95.739		2.99424e-05	-0.089305	-0.0265033	-0.0628317

## Sheet: PNO-LCCSD_T Tight
		Tight
		Dimer						monomerA						monomerB						cpA						cpB
		haVTZ		haVQZ		haV5Z		haVTZ		haVQZ		haV5Z		haVTZ		haVQZ		haV5Z		haVTZ		haVQZ		haV5Z		haVTZ		haVQZ		haV5Z
REF	systems	HF	PNO-LCCSD(T)	HF	PNO-LCCSD(T)	HF	PNO-LCCSD(T)	HF	PNO-LCCSD(T)	HF	PNO-LCCSD(T)	HF	PNO-LCCSD(T)	HF	PNO-LCCSD(T)	HF	PNO-LCCSD(T)	HF	PNO-LCCSD(T)	HF	PNO-LCCSD(T)	HF	PNO-LCCSD(T)	HF	PNO-LCCSD(T)	HF	PNO-LCCSD(T)	HF	PNO-LCCSD(T)	HF	PNO-LCCSD(T)
4.66552	01_Water-Water_0.90_dimer.out	-152.125	-152.69	-152.136	-152.734	-152.139	-152.748	-76.0601	-76.3415	-76.0655	-76.3634	-76.0669	-76.3702	-76.0603	-76.3415	-76.0657	-76.3634	-76.0671	-76.3703	-76.0603	-76.3419	-76.0658	-76.3636	-76.0671	-76.3703	-76.0601	-76.3418	-76.0656	-76.3635	-76.0669	-76.3703
4.95383	01_Water-Water_0.95_dimer.out	-152.126	-152.691	-152.137	-152.735	-152.14	-152.748	-76.0601	-76.3415	-76.0655	-76.3634	-76.0669	-76.3702	-76.0603	-76.3415	-76.0657	-76.3634	-76.0671	-76.3703	-76.0603	-76.3418	-76.0658	-76.3635	-76.0671	-76.3703	-76.0601	-76.3418	-76.0656	-76.3634	-76.0669	-76.3703
4.94643	01_Water-Water_1.00_dimer.out	-152.126	-152.691	-152.137	-152.735	-152.14	-152.748	-76.0601	-76.3415	-76.0655	-76.3634	-76.0669	-76.3702	-76.0603	-76.3415	-76.0657	-76.3634	-76.0671	-76.3703	-76.0603	-76.3418	-76.0657	-76.3635	-76.0671	-76.3703	-76.0601	-76.3417	-76.0656	-76.3634	-76.0669	-76.3703
4.76207	01_Water-Water_1.05_dimer.out	-152.126	-152.691	-152.137	-152.734	-152.14	-152.748	-76.0601	-76.3415	-76.0655	-76.3634	-76.0669	-76.3702	-76.0603	-76.3415	-76.0657	-76.3634	-76.0671	-76.3703	-76.0603	-76.3418	-76.0657	-76.3635	-76.0671	-76.3703	-76.0601	-76.3417	-76.0656	-76.3634	-76.0669	-76.3703
4.47984	01_Water-Water_1.10_dimer.out	-152.126	-152.69	-152.137	-152.734	-152.14	-152.748	-76.0601	-76.3415	-76.0655	-76.3634	-76.0669	-76.3702	-76.0603	-76.3415	-76.0657	-76.3634	-76.0671	-76.3703	-76.0603	-76.3417	-76.0657	-76.3635	-76.0671	-76.3703	-76.0601	-76.3417	-76.0656	-76.3634	-76.0669	-76.3703
3.4705	01_Water-Water_1.25_dimer.out	-152.125	-152.689	-152.136	-152.732	-152.139	-152.746	-76.0601	-76.3415	-76.0655	-76.3634	-76.0669	-76.3702	-76.0603	-76.3415	-76.0657	-76.3634	-76.0671	-76.3703	-76.0603	-76.3417	-76.0657	-76.3634	-76.0671	-76.3703	-76.0601	-76.3416	-76.0655	-76.3634	-76.0669	-76.3702
2.11656	01_Water-Water_1.50_dimer.out	-152.124	-152.686	-152.134	-152.73	-152.137	-152.744	-76.0601	-76.3415	-76.0655	-76.3634	-76.0669	-76.3702	-76.0603	-76.3415	-76.0657	-76.3634	-76.0671	-76.3703	-76.0603	-76.3416	-76.0657	-76.3634	-76.0671	-76.3703	-76.0601	-76.3415	-76.0655	-76.3634	-76.0669	-76.3702
0.874474	01_Water-Water_2.00_dimer.out	-152.122	-152.684	-152.133	-152.728	-152.135	-152.742	-76.0601	-76.3415	-76.0655	-76.3634	-76.0669	-76.3702	-76.0603	-76.3415	-76.0657	-76.3634	-76.0671	-76.3703	-76.0603	-76.3415	-76.0657	-76.3634	-76.0671	-76.3703	-76.0601	-76.3415	-76.0655	-76.3634	-76.0669	-76.3702
5.29836	02_Water-MeOH_0.90_dimer.out	-191.156	-191.911	-191.169	-191.965	-191.173	-191.981	-76.06	-76.3415	-76.0655	-76.3633	-76.0668	-76.3702	-115.092	-115.561	-115.099	-115.593	-115.101	-115.603	-115.092	-115.562	-115.1	-115.593	-115.101	-115.603	-76.0601	-76.3419	-76.0655	-76.3635	-76.0668	-76.3703
5.62873	02_Water-MeOH_0.95_dimer.out	-191.157	-191.912	-191.171	-191.965	-191.174	-191.982	-76.06	-76.3415	-76.0655	-76.3633	-76.0668	-76.3702	-115.092	-115.561	-115.099	-115.593	-115.101	-115.603	-115.092	-115.561	-115.099	-115.593	-115.101	-115.603	-76.0601	-76.3419	-76.0655	-76.3635	-76.0668	-76.3703
5.62675	02_Water-MeOH_1.00_dimer.out	-191.158	-191.912	-191.171	-191.965	-191.174	-191.982	-76.06	-76.3415	-76.0655	-76.3633	-76.0668	-76.3702	-115.092	-115.561	-115.099	-115.593	-115.101	-115.603	-115.092	-115.561	-115.099	-115.593	-115.101	-115.603	-76.0601	-76.3418	-76.0655	-76.3634	-76.0668	-76.3703
5.42332	02_Water-MeOH_1.05_dimer.out	-191.158	-191.911	-191.171	-191.965	-191.174	-191.982	-76.06	-76.3415	-76.0655	-76.3633	-76.0668	-76.3702	-115.092	-115.561	-115.099	-115.593	-115.101	-115.603	-115.092	-115.561	-115.099	-115.593	-115.101	-115.603	-76.0601	-76.3418	-76.0655	-76.3634	-76.0668	-76.3702
5.10642	02_Water-MeOH_1.10_dimer.out	-191.158	-191.911	-191.171	-191.964	-191.174	-191.981	-76.06	-76.3415	-76.0655	-76.3633	-76.0668	-76.3702	-115.092	-115.561	-115.099	-115.593	-115.101	-115.603	-115.092	-115.561	-115.099	-115.593	-115.101	-115.603	-76.0601	-76.3417	-76.0655	-76.3634	-76.0668	-76.3702
3.95632	02_Water-MeOH_1.25_dimer.out	-191.157	-191.909	-191.17	-191.963	-191.173	-191.979	-76.06	-76.3415	-76.0655	-76.3633	-76.0668	-76.3702	-115.092	-115.561	-115.099	-115.593	-115.101	-115.603	-115.092	-115.561	-115.099	-115.593	-115.101	-115.603	-76.0601	-76.3416	-76.0655	-76.3634	-76.0668	-76.3702
2.39149	02_Water-MeOH_1.50_dimer.out	-191.155	-191.906	-191.168	-191.96	-191.172	-191.977	-76.06	-76.3415	-76.0655	-76.3633	-76.0668	-76.3702	-115.092	-115.561	-115.099	-115.593	-115.101	-115.603	-115.092	-115.561	-115.099	-115.593	-115.101	-115.603	-76.06	-76.3415	-76.0655	-76.3634	-76.0668	-76.3702
0.954245	02_Water-MeOH_2.00_dimer.out	-191.153	-191.904	-191.166	-191.958	-191.17	-191.974	-76.06	-76.3415	-76.0655	-76.3633	-76.0668	-76.3702	-115.092	-115.561	-115.099	-115.593	-115.101	-115.603	-115.092	-115.561	-115.099	-115.593	-115.101	-115.603	-76.06	-76.3415	-76.0655	-76.3633	-76.0668	-76.3702
6.60638	03_Water-MeNH2_0.90_dimer.out	-171.321	-172.056	-171.332	-172.105	-171.335	-172.119	-76.0598	-76.3414	-76.0652	-76.3632	-76.0665	-76.3701	-95.2553	-95.7045	-95.2614	-95.7308	-95.2629	-95.7386	-95.2553	-95.7049	-95.2614	-95.731	-95.2629	-95.7386	-76.0598	-76.3418	-76.0652	-76.3634	-76.0665	-76.3702
6.95721	03_Water-MeNH2_0.95_dimer.out	-171.322	-172.057	-171.334	-172.105	-171.336	-172.12	-76.0598	-76.3414	-76.0652	-76.3632	-76.0665	-76.3701	-95.2553	-95.7045	-95.2614	-95.7308	-95.2629	-95.7386	-95.2553	-95.7049	-95.2614	-95.731	-95.2629	-95.7386	-76.0598	-76.3418	-76.0652	-76.3634	-76.0665	-76.3702
6.94056	03_Water-MeNH2_1.00_dimer.out	-171.323	-172.057	-171.334	-172.105	-171.337	-172.12	-76.0598	-76.3414	-76.0652	-76.3632	-76.0665	-76.3701	-95.2553	-95.7045	-95.2614	-95.7308	-95.2629	-95.7386	-95.2553	-95.7048	-95.2614	-95.7309	-95.2629	-95.7386	-76.0598	-76.3417	-76.0652	-76.3634	-76.0665	-76.3702
6.69539	03_Water-MeNH2_1.05_dimer.out	-171.323	-172.057	-171.334	-172.105	-171.337	-172.119	-76.0598	-76.3414	-76.0652	-76.3632	-76.0665	-76.3701	-95.2553	-95.7045	-95.2614	-95.7308	-95.2629	-95.7386	-95.2553	-95.7048	-95.2614	-95.7309	-95.2629	-95.7386	-76.0598	-76.3417	-76.0652	-76.3633	-76.0665	-76.3702
6.31753	03_Water-MeNH2_1.10_dimer.out	-171.323	-172.056	-171.334	-172.104	-171.337	-172.119	-76.0598	-76.3414	-76.0652	-76.3632	-76.0665	-76.3701	-95.2553	-95.7045	-95.2614	-95.7308	-95.2629	-95.7386	-95.2553	-95.7047	-95.2614	-95.7309	-95.2629	-95.7386	-76.0598	-76.3417	-76.0652	-76.3633	-76.0665	-76.3701
4.92823	03_Water-MeNH2_1.25_dimer.out	-171.321	-172.054	-171.333	-172.102	-171.336	-172.117	-76.0598	-76.3414	-76.0652	-76.3632	-76.0665	-76.3701	-95.2553	-95.7045	-95.2614	-95.7308	-95.2629	-95.7386	-95.2553	-95.7046	-95.2614	-95.7309	-95.2629	-95.7386	-76.0598	-76.3416	-76.0652	-76.3633	-76.0665	-76.3701
2.97972	03_Water-MeNH2_1.50_dimer.out	-171.319	-172.051	-171.331	-172.099	-171.334	-172.113	-76.0598	-76.3414	-76.0652	-76.3632	-76.0665	-76.3701	-95.2553	-95.7045	-95.2614	-95.7308	-95.2629	-95.7386	-95.2553	-95.7046	-95.2614	-95.7309	-95.2629	-95.7386	-76.0598	-76.3415	-76.0652	-76.3633	-76.0665	-76.3701
1.14169	03_Water-MeNH2_2.00_dimer.out	-171.317	-172.048	-171.328	-172.096	-171.331	-172.111	-76.0598	-76.3414	-76.0652	-76.3632	-76.0665	-76.3701	-95.2553	-95.7045	-95.2614	-95.7308	-95.2629	-95.7386	-95.2553	-95.7046	-95.2614	-95.7308	-95.2629	-95.7386	-76.0598	-76.3414	-76.0652	-76.3632	-76.0665	-76.3701
7.73932	04_Water-Peptide_0.90_dimer.out	-323.17	-324.494	-323.191	-324.582	-323.196	-324.608	-76.0598	-76.3414	-76.0653	-76.3633	-76.0666	-76.3701	-247.102	-248.14	-247.118	-248.206	-247.121	-248.226	-247.102	-248.141	-247.118	-248.206	-247.121	-248.226	-76.06	-76.342	-76.0653	-76.3635	-76.0666	-76.3702
8.13066	04_Water-Peptide_0.95_dimer.out	-323.171	-324.495	-323.192	-324.582	-323.197	-324.609	-76.0598	-76.3414	-76.0653	-76.3633	-76.0666	-76.3701	-247.102	-248.14	-247.118	-248.206	-247.121	-248.226	-247.102	-248.141	-247.118	-248.206	-247.121	-248.226	-76.0599	-76.3419	-76.0653	-76.3634	-76.0666	-76.3702
8.12775	04_Water-Peptide_1.00_dimer.out	-323.171	-324.495	-323.193	-324.582	-323.197	-324.609	-76.0598	-76.3414	-76.0653	-76.3633	-76.0666	-76.3701	-247.102	-248.14	-247.118	-248.206	-247.121	-248.226	-247.102	-248.141	-247.118	-248.206	-247.121	-248.226	-76.0599	-76.3419	-76.0653	-76.3634	-76.0666	-76.3702
7.87768	04_Water-Peptide_1.05_dimer.out	-323.172	-324.494	-323.193	-324.582	-323.198	-324.609	-76.0598	-76.3414	-76.0653	-76.3633	-76.0666	-76.3701	-247.102	-248.14	-247.118	-248.206	-247.121	-248.226	-247.102	-248.14	-247.118	-248.206	-247.121	-248.226	-76.0599	-76.3418	-76.0653	-76.3634	-76.0666	-76.3702
7.48215	04_Water-Peptide_1.10_dimer.out	-323.171	-324.494	-323.193	-324.581	-323.197	-324.608	-76.0598	-76.3414	-76.0653	-76.3633	-76.0666	-76.3701	-247.102	-248.14	-247.118	-248.206	-247.121	-248.226	-247.102	-248.14	-247.118	-248.206	-247.121	-248.226	-76.0599	-76.3418	-76.0653	-76.3634	-76.0666	-76.3702
5.99425	04_Water-Peptide_1.25_dimer.out	-323.17	-324.491	-323.191	-324.579	-323.196	-324.606	-76.0598	-76.3414	-76.0653	-76.3633	-76.0666	-76.3701	-247.102	-248.14	-247.118	-248.206	-247.121	-248.226	-247.102	-248.14	-247.118	-248.206	-247.121	-248.226	-76.0599	-76.3417	-76.0653	-76.3634	-76.0666	-76.3702
3.83009	04_Water-Peptide_1.50_dimer.out	-323.168	-324.488	-323.189	-324.575	-323.193	-324.602	-76.0598	-76.3414	-76.0653	-76.3633	-76.0666	-76.3701	-247.102	-248.14	-247.118	-248.206	-247.121	-248.226	-247.102	-248.14	-247.118	-248.206	-247.121	-248.226	-76.0599	-76.3415	-76.0653	-76.3633	-76.0666	-76.3702
1.43887	04_Water-Peptide_2.00_dimer.out	-323.164	-324.484	-323.185	-324.572	-323.19	-324.598	-76.0598	-76.3414	-76.0653	-76.3633	-76.0666	-76.3701	-247.102	-248.14	-247.118	-248.206	-247.121	-248.226	-247.102	-248.14	-247.118	-248.206	-247.121	-248.226	-76.0598	-76.3415	-76.0653	-76.3633	-76.0666	-76.3701
5.38667	05_MeOH-MeOH_0.90_dimer.out	-230.187	-231.131	-230.203	-231.194	-230.206	-231.214	-115.092	-115.561	-115.099	-115.593	-115.101	-115.603	-115.092	-115.561	-115.099	-115.593	-115.101	-115.603	-115.092	-115.562	-115.1	-115.593	-115.101	-115.603	-115.092	-115.561	-115.099	-115.593	-115.101	-115.603
5.77098	05_MeOH-MeOH_0.95_dimer.out	-230.189	-231.131	-230.204	-231.195	-230.208	-231.214	-115.092	-115.561	-115.099	-115.593	-115.101	-115.603	-115.092	-115.561	-115.099	-115.593	-115.101	-115.603	-115.092	-115.561	-115.1	-115.593	-115.101	-115.603	-115.092	-115.561	-115.099	-115.593	-115.101	-115.603
5.8036	05_MeOH-MeOH_1.00_dimer.out	-230.189	-231.131	-230.205	-231.195	-230.208	-231.214	-115.092	-115.561	-115.099	-115.593	-115.101	-115.603	-115.092	-115.561	-115.099	-115.593	-115.101	-115.603	-115.092	-115.561	-115.1	-115.593	-115.101	-115.603	-115.092	-115.561	-115.099	-115.593	-115.101	-115.603
5.62	05_MeOH-MeOH_1.05_dimer.out	-230.19	-231.131	-230.205	-231.195	-230.209	-231.214	-115.092	-115.561	-115.099	-115.593	-115.101	-115.603	-115.092	-115.561	-115.099	-115.593	-115.101	-115.603	-115.092	-115.561	-115.1	-115.593	-115.101	-115.603	-115.092	-115.561	-115.099	-115.593	-115.101	-115.603
5.31207	05_MeOH-MeOH_1.10_dimer.out	-230.19	-231.13	-230.205	-231.194	-230.209	-231.214	-115.092	-115.561	-115.099	-115.593	-115.101	-115.603	-115.092	-115.561	-115.099	-115.593	-115.101	-115.603	-115.092	-115.561	-115.1	-115.593	-115.101	-115.603	-115.092	-115.561	-115.099	-115.593	-115.101	-115.603
4.15067	05_MeOH-MeOH_1.25_dimer.out	-230.189	-231.129	-230.204	-231.192	-230.208	-231.212	-115.092	-115.561	-115.099	-115.593	-115.101	-115.603	-115.092	-115.561	-115.099	-115.593	-115.101	-115.603	-115.092	-115.561	-115.1	-115.593	-115.101	-115.603	-115.092	-115.561	-115.099	-115.593	-115.101	-115.603
2.5284	05_MeOH-MeOH_1.50_dimer.out	-230.187	-231.126	-230.202	-231.19	-230.206	-231.209	-115.092	-115.561	-115.099	-115.593	-115.101	-115.603	-115.092	-115.561	-115.099	-115.593	-115.101	-115.603	-115.092	-115.561	-115.1	-115.593	-115.101	-115.603	-115.092	-115.561	-115.099	-115.593	-115.101	-115.603
1.01101	05_MeOH-MeOH_2.00_dimer.out	-230.185	-231.124	-230.2	-231.187	-230.204	-231.207	-115.092	-115.561	-115.099	-115.593	-115.101	-115.603	-115.092	-115.561	-115.099	-115.593	-115.101	-115.603	-115.092	-115.561	-115.1	-115.593	-115.101	-115.603	-115.092	-115.561	-115.099	-115.593	-115.101	-115.603
7.08127	06_MeOH-MeNH2_0.90_dimer.out	-210.351	-211.277	-210.365	-211.335	-210.368	-211.352	-115.091	-115.561	-115.099	-115.592	-115.101	-115.602	-95.2553	-95.7045	-95.2614	-95.7308	-95.2629	-95.7386	-95.2553	-95.7051	-95.2614	-95.7311	-95.2629	-95.7387	-115.091	-115.561	-115.099	-115.593	-115.101	-115.602
7.55441	06_MeOH-MeNH2_0.95_dimer.out	-210.353	-211.277	-210.366	-211.335	-210.37	-211.353	-115.091	-115.561	-115.099	-115.592	-115.101	-115.602	-95.2553	-95.7045	-95.2614	-95.7308	-95.2629	-95.7386	-95.2553	-95.705	-95.2614	-95.731	-95.2629	-95.7386	-115.091	-115.561	-115.099	-115.593	-115.101	-115.602
7.60087	06_MeOH-MeNH2_1.00_dimer.out	-210.353	-211.277	-210.367	-211.335	-210.371	-211.353	-115.091	-115.561	-115.099	-115.592	-115.101	-115.602	-95.2553	-95.7045	-95.2614	-95.7308	-95.2629	-95.7386	-95.2553	-95.7049	-95.2614	-95.731	-95.2629	-95.7386	-115.091	-115.561	-115.099	-115.593	-115.101	-115.602
7.37783	06_MeOH-MeNH2_1.05_dimer.out	-210.354	-211.277	-210.368	-211.335	-210.371	-211.353	-115.091	-115.561	-115.099	-115.592	-115.101	-115.602	-95.2553	-95.7045	-95.2614	-95.7308	-95.2629	-95.7386	-95.2553	-95.7049	-95.2614	-95.731	-95.2629	-95.7386	-115.091	-115.561	-115.099	-115.593	-115.101	-115.602
6.99427	06_MeOH-MeNH2_1.10_dimer.out	-210.354	-211.276	-210.368	-211.334	-210.371	-211.352	-115.091	-115.561	-115.099	-115.592	-115.101	-115.602	-95.2553	-95.7045	-95.2614	-95.7308	-95.2629	-95.7386	-95.2553	-95.7048	-95.2614	-95.7309	-95.2629	-95.7386	-115.091	-115.561	-115.099	-115.593	-115.101	-115.602
5.50482	06_MeOH-MeNH2_1.25_dimer.out	-210.353	-211.274	-210.367	-211.332	-210.37	-211.35	-115.091	-115.561	-115.099	-115.592	-115.101	-115.602	-95.2553	-95.7045	-95.2614	-95.7308	-95.2629	-95.7386	-95.2553	-95.7047	-95.2614	-95.7309	-95.2629	-95.7386	-115.091	-115.561	-115.099	-115.593	-115.101	-115.602
3.34489	06_MeOH-MeNH2_1.50_dimer.out	-210.351	-211.271	-210.365	-211.329	-210.368	-211.346	-115.091	-115.561	-115.099	-115.592	-115.101	-115.602	-95.2553	-95.7045	-95.2614	-95.7308	-95.2629	-95.7386	-95.2553	-95.7046	-95.2614	-95.7309	-95.2629	-95.7386	-115.091	-115.561	-115.099	-115.592	-115.101	-115.602
1.27327	06_MeOH-MeNH2_2.00_dimer.out	-210.348	-211.267	-210.362	-211.325	-210.365	-211.343	-115.091	-115.561	-115.099	-115.592	-115.101	-115.602	-95.2553	-95.7045	-95.2614	-95.7308	-95.2629	-95.7386	-95.2553	-95.7046	-95.2614	-95.7309	-95.2629	-95.7386	-115.091	-115.561	-115.099	-115.592	-115.101	-115.602
7.75614	07_MeOH-Peptide_0.90_dimer.out	-362.2	-363.713	-362.223	-363.811	-362.229	-363.841	-115.091	-115.561	-115.099	-115.593	-115.101	-115.602	-247.102	-248.14	-247.118	-248.206	-247.122	-248.226	-247.103	-248.141	-247.118	-248.206	-247.122	-248.226	-115.091	-115.561	-115.099	-115.593	-115.101	-115.602
8.23517	07_MeOH-Peptide_0.95_dimer.out	-362.202	-363.714	-362.225	-363.812	-362.23	-363.841	-115.091	-115.561	-115.099	-115.593	-115.101	-115.602	-247.102	-248.14	-247.118	-248.206	-247.122	-248.226	-247.103	-248.141	-247.118	-248.206	-247.122	-248.226	-115.091	-115.561	-115.099	-115.593	-115.101	-115.602
8.28898	07_MeOH-Peptide_1.00_dimer.out	-362.202	-363.714	-362.226	-363.812	-362.231	-363.841	-115.091	-115.561	-115.099	-115.593	-115.101	-115.602	-247.102	-248.14	-247.118	-248.206	-247.122	-248.226	-247.103	-248.141	-247.118	-248.206	-247.122	-248.226	-115.091	-115.561	-115.099	-115.593	-115.101	-115.602
8.07188	07_MeOH-Peptide_1.05_dimer.out	-362.203	-363.714	-362.226	-363.811	-362.231	-363.841	-115.091	-115.561	-115.099	-115.593	-115.101	-115.602	-247.102	-248.14	-247.118	-248.206	-247.122	-248.226	-247.103	-248.141	-247.118	-248.206	-247.122	-248.226	-115.091	-115.561	-115.099	-115.593	-115.101	-115.602
7.69153	07_MeOH-Peptide_1.10_dimer.out	-362.203	-363.713	-362.226	-363.811	-362.231	-363.841	-115.091	-115.561	-115.099	-115.593	-115.101	-115.602	-247.102	-248.14	-247.118	-248.206	-247.122	-248.226	-247.103	-248.141	-247.118	-248.206	-247.122	-248.226	-115.091	-115.561	-115.099	-115.593	-115.101	-115.602
6.18753	07_MeOH-Peptide_1.25_dimer.out	-362.201	-363.711	-362.225	-363.808	-362.23	-363.838	-115.091	-115.561	-115.099	-115.593	-115.101	-115.602	-247.102	-248.14	-247.118	-248.206	-247.122	-248.226	-247.103	-248.14	-247.118	-248.206	-247.122	-248.226	-115.091	-115.561	-115.099	-115.593	-115.101	-115.602
3.64659	07_MeOH-Peptide_1.50_dimer.out	-362.199	-363.707	-362.222	-363.804	-362.227	-363.834	-115.091	-115.561	-115.099	-115.593	-115.101	-115.602	-247.102	-248.14	-247.118	-248.206	-247.122	-248.226	-247.103	-248.14	-247.118	-248.206	-247.122	-248.226	-115.091	-115.561	-115.099	-115.593	-115.101	-115.602
1.09751	07_MeOH-Peptide_2.00_dimer.out	-362.195	-363.703	-362.219	-363.8	-362.224	-363.83	-115.091	-115.561	-115.099	-115.593	-115.101	-115.602	-247.102	-248.14	-247.118	-248.206	-247.122	-248.226	-247.102	-248.14	-247.118	-248.206	-247.122	-248.226	-115.091	-115.561	-115.099	-115.593	-115.101	-115.602
4.67513	08_MeOH-Water_0.90_dimer.out	-191.156	-191.91	-191.169	-191.964	-191.172	-191.98	-115.092	-115.561	-115.099	-115.593	-115.101	-115.603	-76.0603	-76.3415	-76.0657	-76.3634	-76.0671	-76.3703	-76.0604	-76.342	-76.0658	-76.3636	-76.0671	-76.3703	-115.092	-115.561	-115.099	-115.593	-115.101	-115.603
5.01703	08_MeOH-Water_0.95_dimer.out	-191.157	-191.911	-191.17	-191.964	-191.174	-191.981	-115.092	-115.561	-115.099	-115.593	-115.101	-115.603	-76.0603	-76.3415	-76.0657	-76.3634	-76.0671	-76.3703	-76.0604	-76.3419	-76.0658	-76.3636	-76.0671	-76.3703	-115.092	-115.561	-115.099	-115.593	-115.101	-115.603
5.04458	08_MeOH-Water_1.00_dimer.out	-191.158	-191.911	-191.171	-191.964	-191.174	-191.981	-115.092	-115.561	-115.099	-115.593	-115.101	-115.603	-76.0603	-76.3415	-76.0657	-76.3634	-76.0671	-76.3703	-76.0604	-76.3419	-76.0658	-76.3635	-76.0671	-76.3703	-115.092	-115.561	-115.099	-115.593	-115.101	-115.603
4.88113	08_MeOH-Water_1.05_dimer.out	-191.158	-191.91	-191.171	-191.964	-191.174	-191.981	-115.092	-115.561	-115.099	-115.593	-115.101	-115.603	-76.0603	-76.3415	-76.0657	-76.3634	-76.0671	-76.3703	-76.0604	-76.3418	-76.0658	-76.3635	-76.0671	-76.3703	-115.092	-115.561	-115.099	-115.593	-115.101	-115.603
4.60958	08_MeOH-Water_1.10_dimer.out	-191.158	-191.91	-191.171	-191.963	-191.174	-191.98	-115.092	-115.561	-115.099	-115.593	-115.101	-115.603	-76.0603	-76.3415	-76.0657	-76.3634	-76.0671	-76.3703	-76.0603	-76.3418	-76.0658	-76.3635	-76.0671	-76.3703	-115.092	-115.561	-115.099	-115.593	-115.101	-115.603
3.59767	08_MeOH-Water_1.25_dimer.out	-191.157	-191.908	-191.17	-191.962	-191.173	-191.979	-115.092	-115.561	-115.099	-115.593	-115.101	-115.603	-76.0603	-76.3415	-76.0657	-76.3634	-76.0671	-76.3703	-76.0603	-76.3417	-76.0658	-76.3634	-76.0671	-76.3703	-115.092	-115.561	-115.099	-115.593	-115.101	-115.603
2.20477	08_MeOH-Water_1.50_dimer.out	-191.155	-191.906	-191.168	-191.96	-191.172	-191.976	-115.092	-115.561	-115.099	-115.593	-115.101	-115.603	-76.0603	-76.3415	-76.0657	-76.3634	-76.0671	-76.3703	-76.0603	-76.3416	-76.0657	-76.3634	-76.0671	-76.3703	-115.092	-115.561	-115.099	-115.593	-115.101	-115.603
0.909327	08_MeOH-Water_2.00_dimer.out	-191.153	-191.904	-191.167	-191.958	-191.17	-191.974	-115.092	-115.561	-115.099	-115.593	-115.101	-115.603	-76.0603	-76.3415	-76.0657	-76.3634	-76.0671	-76.3703	-76.0603	-76.3416	-76.0657	-76.3634	-76.0671	-76.3703	-115.092	-115.561	-115.099	-115.593	-115.101	-115.603
2.83742	09_MeNH2-MeOH_0.90_dimer.out	-210.347	-211.27	-210.361	-211.328	-210.364	-211.346	-95.2552	-95.7045	-95.2613	-95.7308	-95.2628	-95.7385	-115.092	-115.561	-115.1	-115.593	-115.101	-115.603	-115.092	-115.561	-115.1	-115.593	-115.101	-115.603	-95.2552	-95.7047	-95.2613	-95.7309	-95.2628	-95.7386
3.05113	09_MeNH2-MeOH_0.95_dimer.out	-210.348	-211.271	-210.362	-211.329	-210.365	-211.346	-95.2552	-95.7045	-95.2613	-95.7308	-95.2628	-95.7385	-115.092	-115.561	-115.1	-115.593	-115.101	-115.603	-115.092	-115.561	-115.1	-115.593	-115.101	-115.603	-95.2552	-95.7047	-95.2613	-95.7309	-95.2628	-95.7386
3.03663	09_MeNH2-MeOH_1.00_dimer.out	-210.349	-211.27	-210.363	-211.329	-210.366	-211.346	-95.2552	-95.7045	-95.2613	-95.7308	-95.2628	-95.7385	-115.092	-115.561	-115.1	-115.593	-115.101	-115.603	-115.092	-115.561	-115.1	-115.593	-115.101	-115.603	-95.2552	-95.7046	-95.2613	-95.7308	-95.2628	-95.7385
2.89242	09_MeNH2-MeOH_1.05_dimer.out	-210.349	-211.27	-210.363	-211.328	-210.366	-211.346	-95.2552	-95.7045	-95.2613	-95.7308	-95.2628	-95.7385	-115.092	-115.561	-115.1	-115.593	-115.101	-115.603	-115.092	-115.561	-115.1	-115.593	-115.101	-115.603	-95.2552	-95.7046	-95.2613	-95.7308	-95.2628	-95.7385
2.6818	09_MeNH2-MeOH_1.10_dimer.out	-210.349	-211.27	-210.363	-211.328	-210.366	-211.345	-95.2552	-95.7045	-95.2613	-95.7308	-95.2628	-95.7385	-115.092	-115.561	-115.1	-115.593	-115.101	-115.603	-115.092	-115.561	-115.1	-115.593	-115.101	-115.603	-95.2552	-95.7046	-95.2613	-95.7308	-95.2628	-95.7385
1.97082	09_MeNH2-MeOH_1.25_dimer.out	-210.349	-211.269	-210.363	-211.327	-210.366	-211.344	-95.2552	-95.7045	-95.2613	-95.7308	-95.2628	-95.7385	-115.092	-115.561	-115.1	-115.593	-115.101	-115.603	-115.092	-115.561	-115.1	-115.593	-115.101	-115.603	-95.2552	-95.7045	-95.2613	-95.7308	-95.2628	-95.7385
1.09813	09_MeNH2-MeOH_1.50_dimer.out	-210.348	-211.267	-210.362	-211.325	-210.365	-211.343	-95.2552	-95.7045	-95.2613	-95.7308	-95.2628	-95.7385	-115.092	-115.561	-115.1	-115.593	-115.101	-115.603	-115.092	-115.561	-115.1	-115.593	-115.101	-115.603	-95.2552	-95.7045	-95.2613	-95.7308	-95.2628	-95.7385
0.393125	09_MeNH2-MeOH_2.00_dimer.out	-210.348	-211.266	-210.361	-211.324	-210.365	-211.342	-95.2552	-95.7045	-95.2613	-95.7308	-95.2628	-95.7385	-115.092	-115.561	-115.1	-115.593	-115.101	-115.603	-115.092	-115.561	-115.1	-115.593	-115.101	-115.603	-95.2552	-95.7045	-95.2613	-95.7308	-95.2628	-95.7385
3.72176	10_MeNH2-MeNH2_0.90_dimer.out	-190.509	-191.415	-190.521	-191.468	-190.524	-191.483	-95.2551	-95.7045	-95.2613	-95.7308	-95.2627	-95.7385	-95.2552	-95.7045	-95.2613	-95.7308	-95.2628	-95.7386	-95.2553	-95.7049	-95.2614	-95.731	-95.2628	-95.7386	-95.2552	-95.7048	-95.2613	-95.7309	-95.2627	-95.7386
4.10425	10_MeNH2-MeNH2_0.95_dimer.out	-190.511	-191.416	-190.523	-191.468	-190.526	-191.484	-95.2551	-95.7045	-95.2613	-95.7308	-95.2627	-95.7385	-95.2552	-95.7045	-95.2613	-95.7308	-95.2628	-95.7386	-95.2553	-95.7048	-95.2614	-95.7309	-95.2628	-95.7386	-95.2552	-95.7047	-95.2613	-95.7309	-95.2627	-95.7386
4.1526	10_MeNH2-MeNH2_1.00_dimer.out	-190.512	-191.416	-190.524	-191.468	-190.527	-191.484	-95.2551	-95.7045	-95.2613	-95.7308	-95.2627	-95.7385	-95.2552	-95.7045	-95.2613	-95.7308	-95.2628	-95.7386	-95.2553	-95.7048	-95.2614	-95.7309	-95.2628	-95.7386	-95.2552	-95.7047	-95.2613	-95.7309	-95.2627	-95.7385
4.00192	10_MeNH2-MeNH2_1.05_dimer.out	-190.513	-191.415	-190.525	-191.468	-190.528	-191.483	-95.2551	-95.7045	-95.2613	-95.7308	-95.2627	-95.7385	-95.2552	-95.7045	-95.2613	-95.7308	-95.2628	-95.7386	-95.2553	-95.7047	-95.2614	-95.7309	-95.2628	-95.7386	-95.2552	-95.7047	-95.2613	-95.7308	-95.2627	-95.7385
3.74167	10_MeNH2-MeNH2_1.10_dimer.out	-190.513	-191.415	-190.525	-191.468	-190.528	-191.483	-95.2551	-95.7045	-95.2613	-95.7308	-95.2627	-95.7385	-95.2552	-95.7045	-95.2613	-95.7308	-95.2628	-95.7386	-95.2552	-95.7047	-95.2614	-95.7309	-95.2628	-95.7386	-95.2552	-95.7046	-95.2613	-95.7308	-95.2627	-95.7385
2.78069	10_MeNH2-MeNH2_1.25_dimer.out	-190.513	-191.413	-190.525	-191.466	-190.528	-191.481	-95.2551	-95.7045	-95.2613	-95.7308	-95.2627	-95.7385	-95.2552	-95.7045	-95.2613	-95.7308	-95.2628	-95.7386	-95.2552	-95.7046	-95.2614	-95.7308	-95.2628	-95.7386	-95.2551	-95.7045	-95.2613	-95.7308	-95.2627	-95.7385
1.30176	10_MeNH2-MeNH2_1.50_dimer.out	-190.512	-191.411	-190.524	-191.464	-190.527	-191.479	-95.2551	-95.7045	-95.2613	-95.7308	-95.2627	-95.7385	-95.2552	-95.7045	-95.2613	-95.7308	-95.2628	-95.7386	-95.2552	-95.7045	-95.2614	-95.7308	-95.2628	-95.7386	-95.2551	-95.7045	-95.2613	-95.7308	-95.2627	-95.7385
0.385362	10_MeNH2-MeNH2_2.00_dimer.out	-190.511	-191.41	-190.523	-191.462	-190.526	-191.478	-95.2551	-95.7045	-95.2613	-95.7308	-95.2627	-95.7385	-95.2552	-95.7045	-95.2613	-95.7308	-95.2628	-95.7386	-95.2552	-95.7045	-95.2613	-95.7308	-95.2628	-95.7386	-95.2551	-95.7045	-95.2613	-95.7308	-95.2627	-95.7385
4.95826	11_MeNH2-Peptide_0.90_dimer.out	-342.358	-343.853	-342.379	-343.945	-342.384	-343.972	-95.2551	-95.7045	-95.2612	-95.7308	-95.2627	-95.7385	-247.103	-248.14	-247.118	-248.206	-247.122	-248.226	-247.103	-248.141	-247.118	-248.206	-247.122	-248.226	-95.2552	-95.7049	-95.2613	-95.7309	-95.2627	-95.7386
5.35424	11_MeNH2-Peptide_0.95_dimer.out	-342.359	-343.854	-342.381	-343.946	-342.386	-343.973	-95.2551	-95.7045	-95.2612	-95.7308	-95.2627	-95.7385	-247.103	-248.14	-247.118	-248.206	-247.122	-248.226	-247.103	-248.141	-247.118	-248.206	-247.122	-248.226	-95.2552	-95.7048	-95.2613	-95.7309	-95.2627	-95.7385
5.39666	11_MeNH2-Peptide_1.00_dimer.out	-342.361	-343.854	-342.382	-343.946	-342.387	-343.973	-95.2551	-95.7045	-95.2612	-95.7308	-95.2627	-95.7385	-247.103	-248.14	-247.118	-248.206	-247.122	-248.226	-247.103	-248.141	-247.118	-248.206	-247.122	-248.226	-95.2552	-95.7047	-95.2613	-95.7309	-95.2627	-95.7385
5.22226	11_MeNH2-Peptide_1.05_dimer.out	-342.361	-343.853	-342.383	-343.945	-342.388	-343.973	-95.2551	-95.7045	-95.2612	-95.7308	-95.2627	-95.7385	-247.103	-248.14	-247.118	-248.206	-247.122	-248.226	-247.103	-248.141	-247.118	-248.206	-247.122	-248.226	-95.2552	-95.7047	-95.2613	-95.7308	-95.2627	-95.7385
4.92339	11_MeNH2-Peptide_1.10_dimer.out	-342.361	-343.853	-342.383	-343.945	-342.388	-343.972	-95.2551	-95.7045	-95.2612	-95.7308	-95.2627	-95.7385	-247.103	-248.14	-247.118	-248.206	-247.122	-248.226	-247.103	-248.141	-247.118	-248.206	-247.122	-248.226	-95.2551	-95.7047	-95.2613	-95.7308	-95.2627	-95.7385
3.19683	11_MeNH2-Peptide_1.25_dimer.out	-342.361	-343.85	-342.383	-343.942	-342.388	-343.97	-95.2551	-95.7045	-95.2612	-95.7308	-95.2627	-95.7385	-247.103	-248.14	-247.118	-248.206	-247.122	-248.226	-247.103	-248.141	-247.118	-248.206	-247.122	-248.226	-95.2551	-95.7045	-95.2613	-95.7308	-95.2627	-95.7385
1.39662	11_MeNH2-Peptide_1.50_dimer.out	-342.359	-343.847	-342.381	-343.939	-342.386	-343.967	-95.2551	-95.7045	-95.2612	-95.7308	-95.2627	-95.7385	-247.103	-248.14	-247.118	-248.206	-247.122	-248.226	-247.103	-248.14	-247.118	-248.206	-247.122	-248.226	-95.2551	-95.7045	-95.2612	-95.7308	-95.2627	-95.7385
0.454835	11_MeNH2-Peptide_2.00_dimer.out	-342.358	-343.846	-342.38	-343.938	-342.385	-343.965	-95.2551	-95.7045	-95.2612	-95.7308	-95.2627	-95.7385	-247.103	-248.14	-247.118	-248.206	-247.122	-248.226	-247.103	-248.14	-247.118	-248.206	-247.122	-248.226	-95.2551	-95.7045	-95.2612	-95.7308	-95.2627	-95.7385
6.86088	12_MeNH2-Water_0.90_dimer.out	-171.32	-172.057	-171.332	-172.105	-171.334	-172.12	-95.2552	-95.7045	-95.2614	-95.7308	-95.2628	-95.7386	-76.0597	-76.3414	-76.0652	-76.3632	-76.0665	-76.3701	-76.0598	-76.3419	-76.0652	-76.3634	-76.0665	-76.3702	-95.2553	-95.705	-95.2614	-95.731	-95.2629	-95.7386
7.29079	12_MeNH2-Water_0.95_dimer.out	-171.322	-172.058	-171.333	-172.106	-171.336	-172.12	-95.2552	-95.7045	-95.2614	-95.7308	-95.2628	-95.7386	-76.0597	-76.3414	-76.0652	-76.3632	-76.0665	-76.3701	-76.0598	-76.3418	-76.0652	-76.3634	-76.0665	-76.3702	-95.2553	-95.7049	-95.2614	-95.731	-95.2629	-95.7386
7.3118	12_MeNH2-Water_1.00_dimer.out	-171.323	-172.058	-171.334	-172.106	-171.337	-172.12	-95.2552	-95.7045	-95.2614	-95.7308	-95.2628	-95.7386	-76.0597	-76.3414	-76.0652	-76.3632	-76.0665	-76.3701	-76.0598	-76.3418	-76.0652	-76.3634	-76.0665	-76.3702	-95.2553	-95.7049	-95.2614	-95.731	-95.2629	-95.7386
7.07662	12_MeNH2-Water_1.05_dimer.out	-171.323	-172.057	-171.334	-172.105	-171.337	-172.12	-95.2552	-95.7045	-95.2614	-95.7308	-95.2628	-95.7386	-76.0597	-76.3414	-76.0652	-76.3632	-76.0665	-76.3701	-76.0598	-76.3417	-76.0652	-76.3633	-76.0665	-76.3701	-95.2553	-95.7048	-95.2614	-95.7309	-95.2629	-95.7386
6.69088	12_MeNH2-Water_1.10_dimer.out	-171.323	-172.057	-171.334	-172.105	-171.337	-172.119	-95.2552	-95.7045	-95.2614	-95.7308	-95.2628	-95.7386	-76.0597	-76.3414	-76.0652	-76.3632	-76.0665	-76.3701	-76.0598	-76.3417	-76.0652	-76.3633	-76.0665	-76.3701	-95.2553	-95.7048	-95.2614	-95.7309	-95.2629	-95.7386
5.23057	12_MeNH2-Water_1.25_dimer.out	-171.322	-172.054	-171.333	-172.102	-171.336	-172.117	-95.2552	-95.7045	-95.2614	-95.7308	-95.2628	-95.7386	-76.0597	-76.3414	-76.0652	-76.3632	-76.0665	-76.3701	-76.0598	-76.3416	-76.0652	-76.3633	-76.0665	-76.3701	-95.2553	-95.7047	-95.2614	-95.7309	-95.2628	-95.7386
3.15494	12_MeNH2-Water_1.50_dimer.out	-171.319	-172.051	-171.331	-172.099	-171.334	-172.114	-95.2552	-95.7045	-95.2614	-95.7308	-95.2628	-95.7386	-76.0597	-76.3414	-76.0652	-76.3632	-76.0665	-76.3701	-76.0598	-76.3415	-76.0652	-76.3633	-76.0665	-76.3701	-95.2553	-95.7046	-95.2614	-95.7309	-95.2628	-95.7386
1.19627	12_MeNH2-Water_2.00_dimer.out	-171.317	-172.048	-171.328	-172.096	-171.331	-172.111	-95.2552	-95.7045	-95.2614	-95.7308	-95.2628	-95.7386	-76.0597	-76.3414	-76.0652	-76.3632	-76.0665	-76.3701	-76.0597	-76.3414	-76.0652	-76.3632	-76.0665	-76.3701	-95.2553	-95.7045	-95.2614	-95.7308	-95.2628	-95.7386
5.75338	13_Peptide-MeOH_0.90_dimer.out	-362.197	-363.711	-362.221	-363.808	-362.226	-363.838	-247.103	-248.14	-247.118	-248.206	-247.122	-248.226	-115.092	-115.561	-115.1	-115.593	-115.101	-115.603	-115.092	-115.562	-115.1	-115.593	-115.101	-115.603	-247.103	-248.141	-247.118	-248.206	-247.122	-248.226
6.16512	13_Peptide-MeOH_0.95_dimer.out	-362.199	-363.711	-362.222	-363.809	-362.228	-363.839	-247.103	-248.14	-247.118	-248.206	-247.122	-248.226	-115.092	-115.561	-115.1	-115.593	-115.101	-115.603	-115.092	-115.562	-115.1	-115.593	-115.101	-115.603	-247.103	-248.141	-247.118	-248.206	-247.122	-248.226
6.22026	13_Peptide-MeOH_1.00_dimer.out	-362.2	-363.711	-362.223	-363.809	-362.229	-363.839	-247.103	-248.14	-247.118	-248.206	-247.122	-248.226	-115.092	-115.561	-115.1	-115.593	-115.101	-115.603	-115.092	-115.561	-115.1	-115.593	-115.101	-115.603	-247.103	-248.141	-247.118	-248.206	-247.122	-248.226
6.05408	13_Peptide-MeOH_1.05_dimer.out	-362.2	-363.711	-362.224	-363.809	-362.229	-363.838	-247.103	-248.14	-247.118	-248.206	-247.122	-248.226	-115.092	-115.561	-115.1	-115.593	-115.101	-115.603	-115.092	-115.561	-115.1	-115.593	-115.101	-115.603	-247.103	-248.141	-247.118	-248.206	-247.122	-248.226
5.75857	13_Peptide-MeOH_1.10_dimer.out	-362.2	-363.711	-362.224	-363.808	-362.229	-363.838	-247.103	-248.14	-247.118	-248.206	-247.122	-248.226	-115.092	-115.561	-115.1	-115.593	-115.101	-115.603	-115.092	-115.561	-115.1	-115.593	-115.101	-115.603	-247.103	-248.141	-247.118	-248.206	-247.122	-248.226
4.60846	13_Peptide-MeOH_1.25_dimer.out	-362.2	-363.709	-362.223	-363.806	-362.229	-363.836	-247.103	-248.14	-247.118	-248.206	-247.122	-248.226	-115.092	-115.561	-115.1	-115.593	-115.101	-115.603	-115.092	-115.561	-115.1	-115.593	-115.101	-115.603	-247.103	-248.14	-247.118	-248.206	-247.122	-248.226
2.94801	13_Peptide-MeOH_1.50_dimer.out	-362.198	-363.706	-362.222	-363.804	-362.227	-363.833	-247.103	-248.14	-247.118	-248.206	-247.122	-248.226	-115.092	-115.561	-115.1	-115.593	-115.101	-115.603	-115.092	-115.561	-115.1	-115.593	-115.101	-115.603	-247.103	-248.14	-247.118	-248.206	-247.122	-248.226
1.30709	13_Peptide-MeOH_2.00_dimer.out	-362.196	-363.704	-362.22	-363.801	-362.225	-363.831	-247.103	-248.14	-247.118	-248.206	-247.122	-248.226	-115.092	-115.561	-115.1	-115.593	-115.101	-115.603	-115.092	-115.561	-115.1	-115.593	-115.101	-115.603	-247.103	-248.14	-247.118	-248.206	-247.122	-248.226
6.90681	14_Peptide-MeNH2_0.90_dimer.out	-342.36	-343.856	-342.382	-343.948	-342.387	-343.975	-247.102	-248.14	-247.118	-248.206	-247.121	-248.226	-95.2552	-95.7045	-95.2613	-95.7308	-95.2628	-95.7386	-95.2553	-95.7051	-95.2614	-95.731	-95.2628	-95.7386	-247.102	-248.141	-247.118	-248.206	-247.121	-248.226
7.41129	14_Peptide-MeNH2_0.95_dimer.out	-342.362	-343.857	-342.384	-343.949	-342.389	-343.976	-247.102	-248.14	-247.118	-248.206	-247.121	-248.226	-95.2552	-95.7045	-95.2613	-95.7308	-95.2628	-95.7386	-95.2553	-95.705	-95.2614	-95.731	-95.2628	-95.7386	-247.102	-248.141	-247.118	-248.206	-247.121	-248.226
7.50022	14_Peptide-MeNH2_1.00_dimer.out	-342.363	-343.857	-342.385	-343.949	-342.39	-343.976	-247.102	-248.14	-247.118	-248.206	-247.121	-248.226	-95.2552	-95.7045	-95.2613	-95.7308	-95.2628	-95.7386	-95.2553	-95.7049	-95.2614	-95.731	-95.2628	-95.7386	-247.102	-248.141	-247.118	-248.206	-247.121	-248.226
7.32364	14_Peptide-MeNH2_1.05_dimer.out	-342.364	-343.856	-342.386	-343.948	-342.391	-343.976	-247.102	-248.14	-247.118	-248.206	-247.121	-248.226	-95.2552	-95.7045	-95.2613	-95.7308	-95.2628	-95.7386	-95.2553	-95.7048	-95.2614	-95.7309	-95.2628	-95.7386	-247.102	-248.14	-247.118	-248.206	-247.121	-248.226
6.98556	14_Peptide-MeNH2_1.10_dimer.out	-342.364	-343.856	-342.386	-343.948	-342.391	-343.975	-247.102	-248.14	-247.118	-248.206	-247.121	-248.226	-95.2552	-95.7045	-95.2613	-95.7308	-95.2628	-95.7386	-95.2553	-95.7048	-95.2614	-95.7309	-95.2628	-95.7386	-247.102	-248.14	-247.118	-248.206	-247.121	-248.226
5.61042	14_Peptide-MeNH2_1.25_dimer.out	-342.364	-343.854	-342.385	-343.946	-342.39	-343.973	-247.102	-248.14	-247.118	-248.206	-247.121	-248.226	-95.2552	-95.7045	-95.2613	-95.7308	-95.2628	-95.7386	-95.2552	-95.7047	-95.2613	-95.7309	-95.2628	-95.7386	-247.102	-248.14	-247.118	-248.206	-247.121	-248.226
3.54879	14_Peptide-MeNH2_1.50_dimer.out	-342.362	-343.85	-342.384	-343.942	-342.389	-343.97	-247.102	-248.14	-247.118	-248.206	-247.121	-248.226	-95.2552	-95.7045	-95.2613	-95.7308	-95.2628	-95.7386	-95.2552	-95.7046	-95.2613	-95.7309	-95.2628	-95.7386	-247.102	-248.14	-247.118	-248.206	-247.121	-248.226
1.4882	14_Peptide-MeNH2_2.00_dimer.out	-342.36	-343.847	-342.381	-343.939	-342.386	-343.967	-247.102	-248.14	-247.118	-248.206	-247.121	-248.226	-95.2552	-95.7045	-95.2613	-95.7308	-95.2628	-95.7386	-95.2552	-95.7046	-95.2613	-95.7308	-95.2628	-95.7386	-247.102	-248.14	-247.118	-248.206	-247.121	-248.226
8.09631	15_Peptide-Peptide_0.90_dimer.out	-494.209	-496.293	-494.24	-496.425	-494.247	-496.465	-247.102	-248.14	-247.117	-248.206	-247.121	-248.226	-247.102	-248.14	-247.118	-248.206	-247.121	-248.226	-247.102	-248.141	-247.118	-248.206	-247.121	-248.226	-247.102	-248.141	-247.118	-248.206	-247.121	-248.226
8.58646	15_Peptide-Peptide_0.95_dimer.out	-494.211	-496.294	-494.242	-496.426	-494.249	-496.465	-247.102	-248.14	-247.117	-248.206	-247.121	-248.226	-247.102	-248.14	-247.118	-248.206	-247.121	-248.226	-247.102	-248.141	-247.118	-248.206	-247.121	-248.226	-247.102	-248.141	-247.118	-248.206	-247.121	-248.226
8.65929	15_Peptide-Peptide_1.00_dimer.out	-494.212	-496.294	-494.243	-496.426	-494.25	-496.465	-247.102	-248.14	-247.117	-248.206	-247.121	-248.226	-247.102	-248.14	-247.118	-248.206	-247.121	-248.226	-247.102	-248.141	-247.118	-248.206	-247.121	-248.226	-247.102	-248.141	-247.118	-248.206	-247.121	-248.226
8.46406	15_Peptide-Peptide_1.05_dimer.out	-494.212	-496.294	-494.243	-496.425	-494.251	-496.465	-247.102	-248.14	-247.117	-248.206	-247.121	-248.226	-247.102	-248.14	-247.118	-248.206	-247.121	-248.226	-247.102	-248.141	-247.118	-248.206	-247.121	-248.226	-247.102	-248.14	-247.118	-248.206	-247.121	-248.226
8.10479	15_Peptide-Peptide_1.10_dimer.out	-494.212	-496.293	-494.244	-496.425	-494.251	-496.465	-247.102	-248.14	-247.117	-248.206	-247.121	-248.226	-247.102	-248.14	-247.118	-248.206	-247.121	-248.226	-247.102	-248.14	-247.118	-248.206	-247.121	-248.226	-247.102	-248.14	-247.118	-248.206	-247.121	-248.226
6.64877	15_Peptide-Peptide_1.25_dimer.out	-494.212	-496.291	-494.243	-496.423	-494.25	-496.462	-247.102	-248.14	-247.117	-248.206	-247.121	-248.226	-247.102	-248.14	-247.118	-248.206	-247.121	-248.226	-247.102	-248.14	-247.118	-248.206	-247.121	-248.226	-247.102	-248.14	-247.117	-248.206	-247.121	-248.226
4.40743	15_Peptide-Peptide_1.50_dimer.out	-494.21	-496.287	-494.241	-496.419	-494.248	-496.459	-247.102	-248.14	-247.117	-248.206	-247.121	-248.226	-247.102	-248.14	-247.118	-248.206	-247.121	-248.226	-247.102	-248.14	-247.118	-248.206	-247.121	-248.226	-247.102	-248.14	-247.117	-248.206	-247.121	-248.226
1.7751	15_Peptide-Peptide_2.00_dimer.out	-494.207	-496.283	-494.238	-496.415	-494.245	-496.454	-247.102	-248.14	-247.117	-248.206	-247.121	-248.226	-247.102	-248.14	-247.118	-248.206	-247.121	-248.226	-247.102	-248.14	-247.118	-248.206	-247.121	-248.226	-247.102	-248.14	-247.117	-248.206	-247.121	-248.226
4.76122	16_Peptide-Water_0.90_dimer.out	-323.166	-324.489	-323.187	-324.577	-323.192	-324.604	-247.102	-248.14	-247.118	-248.206	-247.121	-248.226	-76.0603	-76.3415	-76.0658	-76.3634	-76.0671	-76.3703	-76.0604	-76.3419	-76.0658	-76.3636	-76.0671	-76.3703	-247.102	-248.141	-247.118	-248.206	-247.121	-248.226
5.10831	16_Peptide-Water_0.95_dimer.out	-323.167	-324.49	-323.189	-324.578	-323.193	-324.604	-247.102	-248.14	-247.118	-248.206	-247.121	-248.226	-76.0603	-76.3415	-76.0658	-76.3634	-76.0671	-76.3703	-76.0604	-76.3419	-76.0658	-76.3635	-76.0671	-76.3703	-247.102	-248.14	-247.118	-248.206	-247.121	-248.226
5.14965	16_Peptide-Water_1.00_dimer.out	-323.168	-324.49	-323.189	-324.578	-323.194	-324.604	-247.102	-248.14	-247.118	-248.206	-247.121	-248.226	-76.0603	-76.3415	-76.0658	-76.3634	-76.0671	-76.3703	-76.0604	-76.3418	-76.0658	-76.3635	-76.0671	-76.3703	-247.102	-248.14	-247.118	-248.206	-247.121	-248.226
5.00493	16_Peptide-Water_1.05_dimer.out	-323.168	-324.49	-323.189	-324.577	-323.194	-324.604	-247.102	-248.14	-247.118	-248.206	-247.121	-248.226	-76.0603	-76.3415	-76.0658	-76.3634	-76.0671	-76.3703	-76.0604	-76.3418	-76.0658	-76.3635	-76.0671	-76.3703	-247.102	-248.14	-247.118	-248.206	-247.121	-248.226
4.75391	16_Peptide-Water_1.10_dimer.out	-323.168	-324.489	-323.189	-324.577	-323.194	-324.604	-247.102	-248.14	-247.118	-248.206	-247.121	-248.226	-76.0603	-76.3415	-76.0658	-76.3634	-76.0671	-76.3703	-76.0604	-76.3418	-76.0658	-76.3635	-76.0671	-76.3703	-247.102	-248.14	-247.118	-248.206	-247.121	-248.226
3.79918	16_Peptide-Water_1.25_dimer.out	-323.168	-324.488	-323.189	-324.576	-323.194	-324.602	-247.102	-248.14	-247.118	-248.206	-247.121	-248.226	-76.0603	-76.3415	-76.0658	-76.3634	-76.0671	-76.3703	-76.0604	-76.3417	-76.0658	-76.3635	-76.0671	-76.3703	-247.102	-248.14	-247.118	-248.206	-247.121	-248.226
2.45383	16_Peptide-Water_1.50_dimer.out	-323.166	-324.486	-323.187	-324.573	-323.192	-324.6	-247.102	-248.14	-247.118	-248.206	-247.121	-248.226	-76.0603	-76.3415	-76.0658	-76.3634	-76.0671	-76.3703	-76.0603	-76.3416	-76.0658	-76.3634	-76.0671	-76.3703	-247.102	-248.14	-247.118	-248.206	-247.121	-248.226
1.13683	16_Peptide-Water_2.00_dimer.out	-323.164	-324.484	-323.185	-324.571	-323.19	-324.598	-247.102	-248.14	-247.118	-248.206	-247.121	-248.226	-76.0603	-76.3415	-76.0658	-76.3634	-76.0671	-76.3703	-76.0603	-76.3416	-76.0658	-76.3634	-76.0671	-76.3703	-247.102	-248.14	-247.118	-248.206	-247.121	-248.226
16.0658	17_Uracil-Uracil_BP_0.90_dimer.out	-825.261	-828.435	-825.312	-828.649			-412.622	-414.205	-412.648	-414.312	-412.654	-414.344	-412.623	-414.205	-412.648	-414.312	-412.654	-414.344	-412.623	-414.206	-412.648	-414.312	-412.654	-414.345	-412.623	-414.206	-412.648	-414.312	-412.654	-414.344
17.1875	17_Uracil-Uracil_BP_0.95_dimer.out	-825.264	-828.437	-825.315	-828.65			-412.622	-414.205	-412.648	-414.312	-412.654	-414.344	-412.623	-414.205	-412.648	-414.312	-412.654	-414.344	-412.623	-414.206	-412.648	-414.312	-412.654	-414.344	-412.623	-414.206	-412.648	-414.312	-412.654	-414.344
17.4054	17_Uracil-Uracil_BP_1.00_dimer.out	-825.266	-828.437	-825.317	-828.651			-412.622	-414.205	-412.648	-414.312	-412.654	-414.344	-412.623	-414.205	-412.648	-414.312	-412.654	-414.344	-412.623	-414.206	-412.648	-414.312	-412.654	-414.344	-412.623	-414.206	-412.648	-414.312	-412.654	-414.344
17.0338	17_Uracil-Uracil_BP_1.05_dimer.out	-825.266	-828.437	-825.318	-828.65			-412.622	-414.205	-412.648	-414.312	-412.654	-414.344	-412.623	-414.205	-412.648	-414.312	-412.654	-414.344	-412.623	-414.206	-412.648	-414.312	-412.654	-414.344	-412.623	-414.205	-412.648	-414.312	-412.654	-414.344
16.293	17_Uracil-Uracil_BP_1.10_dimer.out	-825.266	-828.436	-825.317	-828.649			-412.622	-414.205	-412.648	-414.312	-412.654	-414.344	-412.623	-414.205	-412.648	-414.312	-412.654	-414.344	-412.623	-414.205	-412.648	-414.312	-412.654	-414.344	-412.623	-414.205	-412.648	-414.312	-412.654	-414.344
13.1904	17_Uracil-Uracil_BP_1.25_dimer.out	-825.263	-828.431	-825.314	-828.644			-412.622	-414.205	-412.648	-414.312	-412.654	-414.344	-412.623	-414.205	-412.648	-414.312	-412.654	-414.344	-412.623	-414.205	-412.648	-414.312	-412.654	-414.344	-412.622	-414.205	-412.648	-414.312	-412.654	-414.344
8.35706	17_Uracil-Uracil_BP_1.50_dimer.out	-825.257	-828.423	-825.308	-828.637			-412.622	-414.205	-412.648	-414.312	-412.654	-414.344	-412.623	-414.205	-412.648	-414.312	-412.654	-414.344	-412.623	-414.205	-412.648	-414.312	-412.654	-414.344	-412.622	-414.205	-412.648	-414.312	-412.654	-414.344
3.33743	17_Uracil-Uracil_BP_2.00_dimer.out	-825.25	-828.415	-825.302	-828.629			-412.622	-414.205	-412.648	-414.312	-412.654	-414.344	-412.623	-414.205	-412.648	-414.312	-412.654	-414.344	-412.623	-414.205	-412.648	-414.312	-412.654	-414.344	-412.622	-414.205	-412.648	-414.312	-412.654	-414.344
6.4838	18_Water-Pyridine_0.90_dimer.out	-322.844	-324.199	-322.863	-324.283	-322.868	-324.308	-76.0598	-76.3414	-76.0652	-76.3633	-76.0666	-76.3701	-246.779	-247.847	-246.793	-247.909	-246.796	-247.927	-246.779	-247.847	-246.793	-247.909	-246.796	-247.927	-76.0599	-76.342	-76.0653	-76.3635	-76.0666	-76.3702
6.87005	18_Water-Pyridine_0.95_dimer.out	-322.845	-324.199	-322.865	-324.283	-322.869	-324.308	-76.0598	-76.3414	-76.0652	-76.3633	-76.0666	-76.3701	-246.779	-247.847	-246.793	-247.909	-246.796	-247.927	-246.779	-247.847	-246.793	-247.909	-246.796	-247.927	-76.0599	-76.3419	-76.0652	-76.3634	-76.0666	-76.3702
6.87888	18_Water-Pyridine_1.00_dimer.out	-322.846	-324.199	-322.865	-324.283	-322.87	-324.308	-76.0598	-76.3414	-76.0652	-76.3633	-76.0666	-76.3701	-246.779	-247.847	-246.793	-247.909	-246.796	-247.927	-246.779	-247.847	-246.793	-247.909	-246.796	-247.927	-76.0599	-76.3419	-76.0652	-76.3634	-76.0666	-76.3702
6.65261	18_Water-Pyridine_1.05_dimer.out	-322.846	-324.199	-322.866	-324.283	-322.87	-324.308	-76.0598	-76.3414	-76.0652	-76.3633	-76.0666	-76.3701	-246.779	-247.847	-246.793	-247.909	-246.796	-247.927	-246.779	-247.847	-246.793	-247.909	-246.796	-247.927	-76.0599	-76.3418	-76.0652	-76.3634	-76.0666	-76.3702
6.28924	18_Water-Pyridine_1.10_dimer.out	-322.846	-324.198	-322.865	-324.282	-322.87	-324.307	-76.0598	-76.3414	-76.0652	-76.3633	-76.0666	-76.3701	-246.779	-247.847	-246.793	-247.909	-246.796	-247.927	-246.779	-247.847	-246.793	-247.909	-246.796	-247.927	-76.0598	-76.3418	-76.0652	-76.3634	-76.0666	-76.3702
4.92902	18_Water-Pyridine_1.25_dimer.out	-322.845	-324.196	-322.864	-324.28	-322.869	-324.305	-76.0598	-76.3414	-76.0652	-76.3633	-76.0666	-76.3701	-246.779	-247.847	-246.793	-247.909	-246.796	-247.927	-246.779	-247.847	-246.793	-247.909	-246.796	-247.927	-76.0598	-76.3417	-76.0652	-76.3633	-76.0666	-76.3701
3.00623	18_Water-Pyridine_1.50_dimer.out	-322.842	-324.193	-322.862	-324.277	-322.867	-324.302	-76.0598	-76.3414	-76.0652	-76.3633	-76.0666	-76.3701	-246.779	-247.847	-246.793	-247.909	-246.796	-247.927	-246.779	-247.847	-246.793	-247.909	-246.796	-247.927	-76.0598	-76.3415	-76.0652	-76.3633	-76.0666	-76.3701
1.18444	18_Water-Pyridine_2.00_dimer.out	-322.84	-324.19	-322.86	-324.274	-322.864	-324.299	-76.0598	-76.3414	-76.0652	-76.3633	-76.0666	-76.3701	-246.779	-247.847	-246.793	-247.909	-246.796	-247.927	-246.779	-247.847	-246.793	-247.909	-246.796	-247.927	-76.0598	-76.3414	-76.0652	-76.3633	-76.0666	-76.3701
6.8755	19_MeOH-Pyridine_0.90_dimer.out	-361.874	-363.419	-361.896	-363.512	-361.901	-363.54	-115.091	-115.561	-115.099	-115.592	-115.101	-115.602	-246.779	-247.847	-246.793	-247.909	-246.796	-247.927	-246.779	-247.847	-246.793	-247.909	-246.796	-247.927	-115.091	-115.561	-115.099	-115.593	-115.101	-115.602
7.37372	19_MeOH-Pyridine_0.95_dimer.out	-361.876	-363.419	-361.898	-363.513	-361.903	-363.541	-115.091	-115.561	-115.099	-115.592	-115.101	-115.602	-246.779	-247.847	-246.793	-247.909	-246.796	-247.927	-246.779	-247.847	-246.793	-247.909	-246.796	-247.927	-115.091	-115.561	-115.099	-115.593	-115.101	-115.602
7.44822	19_MeOH-Pyridine_1.00_dimer.out	-361.877	-363.419	-361.899	-363.513	-361.904	-363.541	-115.091	-115.561	-115.099	-115.592	-115.101	-115.602	-246.779	-247.847	-246.793	-247.909	-246.796	-247.927	-246.779	-247.847	-246.793	-247.909	-246.796	-247.927	-115.091	-115.561	-115.099	-115.593	-115.101	-115.602
7.25343	19_MeOH-Pyridine_1.05_dimer.out	-361.877	-363.419	-361.899	-363.513	-361.904	-363.541	-115.091	-115.561	-115.099	-115.592	-115.101	-115.602	-246.779	-247.847	-246.793	-247.909	-246.796	-247.927	-246.779	-247.847	-246.793	-247.909	-246.796	-247.927	-115.091	-115.561	-115.099	-115.593	-115.101	-115.602
6.89666	19_MeOH-Pyridine_1.10_dimer.out	-361.877	-363.419	-361.899	-363.512	-361.904	-363.54	-115.091	-115.561	-115.099	-115.592	-115.101	-115.602	-246.779	-247.847	-246.793	-247.909	-246.796	-247.927	-246.779	-247.847	-246.793	-247.909	-246.796	-247.927	-115.091	-115.561	-115.099	-115.593	-115.101	-115.602
5.47291	19_MeOH-Pyridine_1.25_dimer.out	-361.876	-363.416	-361.898	-363.51	-361.903	-363.538	-115.091	-115.561	-115.099	-115.592	-115.101	-115.602	-246.779	-247.847	-246.793	-247.909	-246.796	-247.927	-246.779	-247.847	-246.793	-247.909	-246.796	-247.927	-115.091	-115.561	-115.099	-115.593	-115.101	-115.602
3.37293	19_MeOH-Pyridine_1.50_dimer.out	-361.874	-363.413	-361.896	-363.507	-361.901	-363.535	-115.091	-115.561	-115.099	-115.592	-115.101	-115.602	-246.779	-247.847	-246.793	-247.909	-246.796	-247.927	-246.779	-247.847	-246.793	-247.909	-246.796	-247.927	-115.091	-115.561	-115.099	-115.593	-115.101	-115.602
1.32821	19_MeOH-Pyridine_2.00_dimer.out	-361.872	-363.41	-361.894	-363.504	-361.898	-363.532	-115.091	-115.561	-115.099	-115.592	-115.101	-115.602	-246.779	-247.847	-246.793	-247.909	-246.796	-247.927	-246.779	-247.847	-246.793	-247.909	-246.796	-247.927	-115.091	-115.561	-115.099	-115.593	-115.101	-115.602
17.9251	20_AcOH-AcOH_0.90_dimer.out	-455.826	-457.565	-455.855	-457.686	-455.862	-457.724	-227.902	-228.768	-227.917	-228.829	-227.921	-228.848	-227.902	-228.768	-227.917	-228.829	-227.921	-228.848	-227.903	-228.769	-227.917	-228.829	-227.921	-228.848	-227.903	-228.769	-227.917	-228.829	-227.921	-228.848
19.1701	20_AcOH-AcOH_0.95_dimer.out	-455.829	-457.567	-455.858	-457.688	-455.865	-457.726	-227.902	-228.768	-227.917	-228.829	-227.921	-228.848	-227.902	-228.768	-227.917	-228.829	-227.921	-228.848	-227.903	-228.769	-227.917	-228.829	-227.921	-228.848	-227.903	-228.769	-227.917	-228.829	-227.921	-228.848
19.3967	20_AcOH-AcOH_1.00_dimer.out	-455.83	-457.567	-455.86	-457.689	-455.866	-457.727	-227.902	-228.768	-227.917	-228.829	-227.921	-228.848	-227.902	-228.768	-227.917	-228.829	-227.921	-228.848	-227.903	-228.769	-227.917	-228.829	-227.921	-228.848	-227.903	-228.769	-227.917	-228.829	-227.921	-228.848
18.9647	20_AcOH-AcOH_1.05_dimer.out	-455.83	-457.566	-455.86	-457.688	-455.866	-457.726	-227.902	-228.768	-227.917	-228.829	-227.921	-228.848	-227.902	-228.768	-227.917	-228.829	-227.921	-228.848	-227.903	-228.769	-227.917	-228.829	-227.921	-228.848	-227.903	-228.769	-227.917	-228.829	-227.921	-228.848
18.1251	20_AcOH-AcOH_1.10_dimer.out	-455.829	-457.565	-455.859	-457.687	-455.866	-457.725	-227.902	-228.768	-227.917	-228.829	-227.921	-228.848	-227.902	-228.768	-227.917	-228.829	-227.921	-228.848	-227.903	-228.769	-227.917	-228.829	-227.921	-228.848	-227.903	-228.769	-227.917	-228.829	-227.921	-228.848
14.6347	20_AcOH-AcOH_1.25_dimer.out	-455.826	-457.56	-455.855	-457.681	-455.862	-457.719	-227.902	-228.768	-227.917	-228.829	-227.921	-228.848	-227.902	-228.768	-227.917	-228.829	-227.921	-228.848	-227.902	-228.769	-227.917	-228.829	-227.921	-228.848	-227.902	-228.769	-227.917	-228.829	-227.921	-228.848
9.21926	20_AcOH-AcOH_1.50_dimer.out	-455.819	-457.551	-455.848	-457.673	-455.855	-457.711	-227.902	-228.768	-227.917	-228.829	-227.921	-228.848	-227.902	-228.768	-227.917	-228.829	-227.921	-228.848	-227.902	-228.768	-227.917	-228.829	-227.921	-228.848	-227.902	-228.768	-227.917	-228.829	-227.921	-228.848
3.59408	20_AcOH-AcOH_2.00_dimer.out	-455.811	-457.542	-455.84	-457.664	-455.847	-457.702	-227.902	-228.768	-227.917	-228.829	-227.921	-228.848	-227.902	-228.768	-227.917	-228.829	-227.921	-228.848	-227.902	-228.768	-227.917	-228.829	-227.921	-228.848	-227.902	-228.768	-227.917	-228.829	-227.921	-228.848
15.2739	21_AcNH2-AcNH2_0.90_dimer.out	-416.138	-417.836	-416.164	-417.947	-416.17	-417.981	-208.061	-208.906	-208.074	-208.961	-208.077	-208.978	-208.061	-208.906	-208.074	-208.961	-208.077	-208.978	-208.061	-208.907	-208.074	-208.962	-208.077	-208.978	-208.061	-208.907	-208.074	-208.962	-208.077	-208.978
16.2994	21_AcNH2-AcNH2_0.95_dimer.out	-416.141	-417.837	-416.167	-417.949	-416.173	-417.982	-208.061	-208.906	-208.074	-208.961	-208.077	-208.978	-208.061	-208.906	-208.074	-208.961	-208.077	-208.978	-208.061	-208.907	-208.074	-208.962	-208.077	-208.978	-208.061	-208.907	-208.074	-208.962	-208.077	-208.978
16.4717	21_AcNH2-AcNH2_1.00_dimer.out	-416.142	-417.838	-416.169	-417.949	-416.175	-417.983	-208.061	-208.906	-208.074	-208.961	-208.077	-208.978	-208.061	-208.906	-208.074	-208.961	-208.077	-208.978	-208.061	-208.906	-208.074	-208.962	-208.077	-208.978	-208.061	-208.906	-208.074	-208.962	-208.077	-208.978
16.094	21_AcNH2-AcNH2_1.05_dimer.out	-416.142	-417.837	-416.169	-417.948	-416.175	-417.982	-208.061	-208.906	-208.074	-208.961	-208.077	-208.978	-208.061	-208.906	-208.074	-208.961	-208.077	-208.978	-208.061	-208.906	-208.074	-208.962	-208.077	-208.978	-208.061	-208.906	-208.074	-208.962	-208.077	-208.978
15.3796	21_AcNH2-AcNH2_1.10_dimer.out	-416.142	-417.836	-416.169	-417.947	-416.175	-417.981	-208.061	-208.906	-208.074	-208.961	-208.077	-208.978	-208.061	-208.906	-208.074	-208.961	-208.077	-208.978	-208.061	-208.906	-208.074	-208.961	-208.077	-208.978	-208.061	-208.906	-208.074	-208.961	-208.077	-208.978
12.4598	21_AcNH2-AcNH2_1.25_dimer.out	-416.139	-417.831	-416.166	-417.943	-416.172	-417.976	-208.061	-208.906	-208.074	-208.961	-208.077	-208.978	-208.061	-208.906	-208.074	-208.961	-208.077	-208.978	-208.061	-208.906	-208.074	-208.961	-208.077	-208.978	-208.061	-208.906	-208.074	-208.961	-208.077	-208.978
8.00668	21_AcNH2-AcNH2_1.50_dimer.out	-416.134	-417.824	-416.161	-417.935	-416.167	-417.969	-208.061	-208.906	-208.074	-208.961	-208.077	-208.978	-208.061	-208.906	-208.074	-208.961	-208.077	-208.978	-208.061	-208.906	-208.074	-208.961	-208.077	-208.978	-208.061	-208.906	-208.074	-208.961	-208.077	-208.978
3.00804	21_AcNH2-AcNH2_2.00_dimer.out	-416.127	-417.816	-416.154	-417.928	-416.16	-417.961	-208.061	-208.906	-208.074	-208.961	-208.077	-208.978	-208.061	-208.906	-208.074	-208.961	-208.077	-208.978	-208.061	-208.906	-208.074	-208.961	-208.077	-208.978	-208.061	-208.906	-208.074	-208.961	-208.077	-208.978
18.3243	22_AcOH-Uracil_0.90_dimer.out	-640.546	-643.002	-640.586	-643.169	-640.595	-643.221	-227.902	-228.768	-227.917	-228.829	-227.921	-228.848	-412.622	-414.205	-412.648	-414.311	-412.654	-414.344	-412.623	-414.206	-412.648	-414.312	-412.654	-414.344	-227.903	-228.769	-227.917	-228.829	-227.921	-228.848
19.5241	22_AcOH-Uracil_0.95_dimer.out	-640.549	-643.004	-640.589	-643.171	-640.598	-643.223	-227.902	-228.768	-227.917	-228.829	-227.921	-228.848	-412.622	-414.205	-412.648	-414.311	-412.654	-414.344	-412.623	-414.206	-412.648	-414.312	-412.654	-414.344	-227.903	-228.769	-227.917	-228.829	-227.921	-228.848
19.7586	22_AcOH-Uracil_1.00_dimer.out	-640.55	-643.004	-640.591	-643.172	-640.599	-643.223	-227.902	-228.768	-227.917	-228.829	-227.921	-228.848	-412.622	-414.205	-412.648	-414.311	-412.654	-414.344	-412.622	-414.205	-412.648	-414.312	-412.654	-414.344	-227.903	-228.769	-227.917	-228.829	-227.921	-228.848
19.3605	22_AcOH-Uracil_1.05_dimer.out	-640.55	-643.004	-640.591	-643.171	-640.6	-643.223	-227.902	-228.768	-227.917	-228.829	-227.921	-228.848	-412.622	-414.205	-412.648	-414.311	-412.654	-414.344	-412.622	-414.205	-412.648	-414.312	-412.654	-414.344	-227.903	-228.769	-227.917	-228.829	-227.921	-228.848
18.5649	22_AcOH-Uracil_1.10_dimer.out	-640.55	-643.002	-640.59	-643.17	-640.599	-643.221	-227.902	-228.768	-227.917	-228.829	-227.921	-228.848	-412.622	-414.205	-412.648	-414.311	-412.654	-414.344	-412.622	-414.205	-412.648	-414.312	-412.654	-414.344	-227.903	-228.769	-227.917	-228.829	-227.921	-228.848
15.1977	22_AcOH-Uracil_1.25_dimer.out	-640.546	-642.997	-640.587	-643.165	-640.596	-643.216	-227.902	-228.768	-227.917	-228.829	-227.921	-228.848	-412.622	-414.205	-412.648	-414.311	-412.654	-414.344	-412.622	-414.205	-412.648	-414.312	-412.654	-414.344	-227.903	-228.768	-227.917	-228.829	-227.921	-228.848
9.86735	22_AcOH-Uracil_1.50_dimer.out	-640.54	-642.988	-640.58	-643.156	-640.589	-643.208	-227.902	-228.768	-227.917	-228.829	-227.921	-228.848	-412.622	-414.205	-412.648	-414.311	-412.654	-414.344	-412.622	-414.205	-412.648	-414.312	-412.654	-414.344	-227.902	-228.768	-227.917	-228.829	-227.921	-228.848
4.14991	22_AcOH-Uracil_2.00_dimer.out	-640.532	-642.979	-640.572	-643.147	-640.581	-643.199	-227.902	-228.768	-227.917	-228.829	-227.921	-228.848	-412.622	-414.205	-412.648	-414.311	-412.654	-414.344	-412.622	-414.205	-412.648	-414.311	-412.654	-414.344	-227.902	-228.768	-227.917	-228.829	-227.921	-228.848
18.0758	23_AcNH2-Uracil_0.90_dimer.out	-620.703	-623.139	-620.742	-623.301	-620.75	-623.351	-208.061	-208.906	-208.074	-208.961	-208.077	-208.978	-412.622	-414.204	-412.648	-414.311	-412.653	-414.344	-412.622	-414.205	-412.648	-414.312	-412.653	-414.344	-208.061	-208.907	-208.074	-208.962	-208.077	-208.978
19.1946	23_AcNH2-Uracil_0.95_dimer.out	-620.706	-623.141	-620.745	-623.303	-620.753	-623.353	-208.061	-208.906	-208.074	-208.961	-208.077	-208.978	-412.622	-414.204	-412.648	-414.311	-412.653	-414.344	-412.622	-414.205	-412.648	-414.312	-412.653	-414.344	-208.061	-208.907	-208.074	-208.962	-208.077	-208.978
19.4317	23_AcNH2-Uracil_1.00_dimer.out	-620.708	-623.141	-620.747	-623.303	-620.755	-623.353	-208.061	-208.906	-208.074	-208.961	-208.077	-208.978	-412.622	-414.204	-412.648	-414.311	-412.653	-414.344	-412.622	-414.205	-412.648	-414.312	-412.653	-414.344	-208.061	-208.906	-208.074	-208.962	-208.077	-208.978
19.0856	23_AcNH2-Uracil_1.05_dimer.out	-620.708	-623.141	-620.747	-623.303	-620.755	-623.352	-208.061	-208.906	-208.074	-208.961	-208.077	-208.978	-412.622	-414.204	-412.648	-414.311	-412.653	-414.344	-412.622	-414.205	-412.648	-414.311	-412.653	-414.344	-208.061	-208.906	-208.074	-208.961	-208.077	-208.978
18.3674	23_AcNH2-Uracil_1.10_dimer.out	-620.708	-623.139	-620.747	-623.302	-620.755	-623.351	-208.061	-208.906	-208.074	-208.961	-208.077	-208.978	-412.622	-414.204	-412.648	-414.311	-412.653	-414.344	-412.622	-414.205	-412.648	-414.311	-412.653	-414.344	-208.061	-208.906	-208.074	-208.961	-208.077	-208.978
15.2646	23_AcNH2-Uracil_1.25_dimer.out	-620.705	-623.134	-620.744	-623.297	-620.752	-623.346	-208.061	-208.906	-208.074	-208.961	-208.077	-208.978	-412.622	-414.204	-412.648	-414.311	-412.653	-414.344	-412.622	-414.205	-412.648	-414.311	-412.653	-414.344	-208.061	-208.906	-208.074	-208.961	-208.077	-208.978
10.2404	23_AcNH2-Uracil_1.50_dimer.out	-620.698	-623.126	-620.737	-623.289	-620.746	-623.338	-208.061	-208.906	-208.074	-208.961	-208.077	-208.978	-412.622	-414.204	-412.648	-414.311	-412.653	-414.344	-412.622	-414.205	-412.648	-414.311	-412.653	-414.344	-208.061	-208.906	-208.074	-208.961	-208.077	-208.978
4.66191	23_AcNH2-Uracil_2.00_dimer.out	-620.691	-623.118	-620.73	-623.28	-620.738	-623.33	-208.061	-208.906	-208.074	-208.961	-208.077	-208.978	-412.622	-414.204	-412.648	-414.311	-412.653	-414.344	-412.622	-414.205	-412.648	-414.311	-412.653	-414.344	-208.061	-208.906	-208.074	-208.961	-208.077	-208.978
-0.137809	24_Benzene-Benzene_pi-pi_0.90_dimer.out	-461.541	-463.638	-461.568	-463.754			-230.781	-231.818	-230.794	-231.877	-230.797	-231.894	-230.781	-231.818	-230.794	-231.877	-230.797	-231.894	-230.781	-231.819	-230.794	-231.877	-230.797	-231.894	-230.781	-231.819	-230.794	-231.877	-230.797	-231.894
1.79077	24_Benzene-Benzene_pi-pi_0.95_dimer.out	-461.549	-463.641	-461.576	-463.757			-230.781	-231.818	-230.794	-231.877	-230.797	-231.894	-230.781	-231.818	-230.794	-231.877	-230.797	-231.894	-230.781	-231.819	-230.794	-231.877	-230.797	-231.894	-230.781	-231.819	-230.794	-231.877	-230.797	-231.894
2.52128	24_Benzene-Benzene_pi-pi_1.00_dimer.out	-461.554	-463.641	-461.581	-463.758			-230.781	-231.818	-230.794	-231.877	-230.797	-231.894	-230.781	-231.818	-230.794	-231.877	-230.797	-231.894	-230.781	-231.819	-230.794	-231.877	-230.797	-231.894	-230.781	-231.819	-230.794	-231.877	-230.797	-231.894
2.63293	24_Benzene-Benzene_pi-pi_1.05_dimer.out	-461.557	-463.641	-461.583	-463.758			-230.781	-231.818	-230.794	-231.877	-230.797	-231.894	-230.781	-231.818	-230.794	-231.877	-230.797	-231.894	-230.781	-231.819	-230.794	-231.877	-230.797	-231.894	-230.781	-231.819	-230.794	-231.877	-230.797	-231.894
2.44969	24_Benzene-Benzene_pi-pi_1.10_dimer.out	-461.559	-463.641	-461.585	-463.758			-230.781	-231.818	-230.794	-231.877	-230.797	-231.894	-230.781	-231.818	-230.794	-231.877	-230.797	-231.894	-230.781	-231.819	-230.794	-231.877	-230.797	-231.894	-230.781	-231.819	-230.794	-231.877	-230.797	-231.894
1.47949	24_Benzene-Benzene_pi-pi_1.25_dimer.out	-461.561	-463.639	-461.588	-463.756			-230.781	-231.818	-230.794	-231.877	-230.797	-231.894	-230.781	-231.818	-230.794	-231.877	-230.797	-231.894	-230.781	-231.818	-230.794	-231.877	-230.797	-231.894	-230.781	-231.818	-230.794	-231.877	-230.797	-231.894
0.468184	24_Benzene-Benzene_pi-pi_1.50_dimer.out	-461.562	-463.637	-461.588	-463.755			-230.781	-231.818	-230.794	-231.877	-230.797	-231.894	-230.781	-231.818	-230.794	-231.877	-230.797	-231.894	-230.781	-231.818	-230.794	-231.877	-230.797	-231.894	-230.781	-231.818	-230.794	-231.877	-230.797	-231.894
0.0586454	24_Benzene-Benzene_pi-pi_2.00_dimer.out	-461.562	-463.636	-461.589	-463.754			-230.781	-231.818	-230.794	-231.877	-230.797	-231.894	-230.781	-231.818	-230.794	-231.877	-230.797	-231.894	-230.781	-231.818	-230.794	-231.877	-230.797	-231.894	-230.781	-231.818	-230.794	-231.877	-230.797	-231.894
0.964221	25_Pyridine-Pyridine_pi-pi_0.90_dimer.out	-493.537	-495.697	-493.566	-495.82			-246.778	-247.847	-246.793	-247.909	-246.796	-247.927	-246.778	-247.847	-246.793	-247.909	-246.796	-247.927	-246.779	-247.848	-246.793	-247.909	-246.796	-247.927	-246.779	-247.848	-246.793	-247.909	-246.796	-247.927
2.89122	25_Pyridine-Pyridine_pi-pi_0.95_dimer.out	-493.545	-495.699	-493.574	-495.823			-246.778	-247.847	-246.793	-247.909	-246.796	-247.927	-246.778	-247.847	-246.793	-247.909	-246.796	-247.927	-246.779	-247.848	-246.793	-247.909	-246.796	-247.927	-246.779	-247.848	-246.793	-247.909	-246.796	-247.927
3.61049	25_Pyridine-Pyridine_pi-pi_1.00_dimer.out	-493.55	-495.7	-493.578	-495.824			-246.778	-247.847	-246.793	-247.909	-246.796	-247.927	-246.778	-247.847	-246.793	-247.909	-246.796	-247.927	-246.779	-247.848	-246.793	-247.909	-246.796	-247.927	-246.779	-247.848	-246.793	-247.909	-246.796	-247.927
3.68858	25_Pyridine-Pyridine_pi-pi_1.05_dimer.out	-493.553	-495.7	-493.581	-495.824			-246.778	-247.847	-246.793	-247.909	-246.796	-247.927	-246.778	-247.847	-246.793	-247.909	-246.796	-247.927	-246.779	-247.847	-246.793	-247.909	-246.796	-247.927	-246.779	-247.847	-246.793	-247.909	-246.796	-247.927
3.45182	25_Pyridine-Pyridine_pi-pi_1.10_dimer.out	-493.555	-495.7	-493.583	-495.823			-246.778	-247.847	-246.793	-247.909	-246.796	-247.927	-246.778	-247.847	-246.793	-247.909	-246.796	-247.927	-246.779	-247.847	-246.793	-247.909	-246.796	-247.927	-246.779	-247.847	-246.793	-247.909	-246.796	-247.927
2.29922	25_Pyridine-Pyridine_pi-pi_1.25_dimer.out	-493.557	-495.697	-493.585	-495.822			-246.778	-247.847	-246.793	-247.909	-246.796	-247.927	-246.778	-247.847	-246.793	-247.909	-246.796	-247.927	-246.779	-247.847	-246.793	-247.909	-246.796	-247.927	-246.779	-247.847	-246.793	-247.909	-246.796	-247.927
0.945317	25_Pyridine-Pyridine_pi-pi_1.50_dimer.out	-493.557	-495.695	-493.586	-495.819	-493.592	-495.856	-246.778	-247.847	-246.793	-247.909	-246.796	-247.927	-246.778	-247.847	-246.793	-247.909	-246.796	-247.927	-246.778	-247.847	-246.793	-247.909	-246.796	-247.927	-246.778	-247.847	-246.793	-247.909	-246.796	-247.927
0.233435	25_Pyridine-Pyridine_pi-pi_2.00_dimer.out	-493.557	-495.694	-493.586	-495.818	-493.592	-495.855	-246.778	-247.847	-246.793	-247.909	-246.796	-247.927	-246.778	-247.847	-246.793	-247.909	-246.796	-247.927	-246.778	-247.847	-246.793	-247.909	-246.796	-247.927	-246.778	-247.847	-246.793	-247.909	-246.796	-247.927
7.5928	26_Uracil-Uracil_pi-pi_0.90_dimer.out	-825.236	-828.425	-825.287	-828.637			-412.623	-414.205	-412.649	-414.312	-412.655	-414.345	-412.623	-414.205	-412.649	-414.312	-412.655	-414.345	-412.624	-414.207	-412.649	-414.313	-412.655	-414.345	-412.624	-414.207	-412.649	-414.313	-412.655	-414.345
9.26565	26_Uracil-Uracil_pi-pi_0.95_dimer.out	-825.243	-828.428	-825.294	-828.64			-412.623	-414.205	-412.649	-414.312	-412.655	-414.345	-412.623	-414.205	-412.649	-414.312	-412.655	-414.345	-412.624	-414.207	-412.649	-414.313	-412.655	-414.345	-412.624	-414.207	-412.649	-414.313	-412.655	-414.345
9.61943	26_Uracil-Uracil_pi-pi_1.00_dimer.out	-825.248	-828.428	-825.299	-828.64			-412.623	-414.205	-412.649	-414.312	-412.655	-414.345	-412.623	-414.205	-412.649	-414.312	-412.655	-414.345	-412.624	-414.207	-412.649	-414.313	-412.655	-414.345	-412.624	-414.207	-412.649	-414.313	-412.655	-414.345
9.25628	26_Uracil-Uracil_pi-pi_1.05_dimer.out	-825.25	-828.427	-825.301	-828.639			-412.623	-414.205	-412.649	-414.312	-412.655	-414.345	-412.623	-414.205	-412.649	-414.312	-412.655	-414.345	-412.624	-414.206	-412.649	-414.312	-412.655	-414.345	-412.624	-414.206	-412.649	-414.312	-412.655	-414.345
8.54106	26_Uracil-Uracil_pi-pi_1.10_dimer.out	-825.251	-828.425	-825.302	-828.638			-412.623	-414.205	-412.649	-414.312	-412.655	-414.345	-412.623	-414.205	-412.649	-414.312	-412.655	-414.345	-412.624	-414.206	-412.649	-414.312	-412.655	-414.345	-412.624	-414.206	-412.649	-414.312	-412.655	-414.345
5.99344	26_Uracil-Uracil_pi-pi_1.25_dimer.out	-825.252	-828.421	-825.303	-828.634			-412.623	-414.205	-412.649	-414.312	-412.655	-414.345	-412.623	-414.205	-412.649	-414.312	-412.655	-414.345	-412.624	-414.206	-412.649	-414.312	-412.655	-414.345	-412.624	-414.206	-412.649	-414.312	-412.655	-414.345
3.07071	26_Uracil-Uracil_pi-pi_1.50_dimer.out	-825.25	-828.416	-825.301	-828.629			-412.623	-414.205	-412.649	-414.312	-412.655	-414.345	-412.623	-414.205	-412.649	-414.312	-412.655	-414.345	-412.624	-414.205	-412.649	-414.312	-412.655	-414.345	-412.624	-414.205	-412.649	-414.312	-412.655	-414.345
0.986244	26_Uracil-Uracil_pi-pi_2.00_dimer.out	-825.248	-828.412	-825.3	-828.626			-412.623	-414.205	-412.649	-414.312	-412.655	-414.345	-412.623	-414.205	-412.649	-414.312	-412.655	-414.345	-412.624	-414.205	-412.649	-414.312	-412.655	-414.345	-412.624	-414.205	-412.649	-414.312	-412.655	-414.345
0.362257	27_Benzene-Pyridine_pi-pi_0.90_dimer.out	-477.539	-479.667	-477.566	-479.787			-230.781	-231.818	-230.794	-231.877	-230.797	-231.894	-246.778	-247.847	-246.793	-247.909	-246.796	-247.927	-246.779	-247.848	-246.793	-247.909	-246.796	-247.927	-230.781	-231.819	-230.794	-231.877	-230.797	-231.894
2.41302	27_Benzene-Pyridine_pi-pi_0.95_dimer.out	-477.547	-479.67	-477.575	-479.79			-230.781	-231.818	-230.794	-231.877	-230.797	-231.894	-246.778	-247.847	-246.793	-247.909	-246.796	-247.927	-246.779	-247.848	-246.793	-247.909	-246.796	-247.927	-230.781	-231.819	-230.794	-231.877	-230.797	-231.894
3.15603	27_Benzene-Pyridine_pi-pi_1.00_dimer.out	-477.552	-479.671	-477.58	-479.791			-230.781	-231.818	-230.794	-231.877	-230.797	-231.894	-246.778	-247.847	-246.793	-247.909	-246.796	-247.927	-246.779	-247.848	-246.793	-247.909	-246.796	-247.927	-230.781	-231.819	-230.794	-231.877	-230.797	-231.894
3.23443	27_Benzene-Pyridine_pi-pi_1.05_dimer.out	-477.555	-479.671	-477.583	-479.791			-230.781	-231.818	-230.794	-231.877	-230.797	-231.894	-246.778	-247.847	-246.793	-247.909	-246.796	-247.927	-246.779	-247.847	-246.793	-247.909	-246.796	-247.927	-230.781	-231.819	-230.794	-231.877	-230.797	-231.894
3.00145	27_Benzene-Pyridine_pi-pi_1.10_dimer.out	-477.557	-479.67	-477.584	-479.791			-230.781	-231.818	-230.794	-231.877	-230.797	-231.894	-246.778	-247.847	-246.793	-247.909	-246.796	-247.927	-246.779	-247.847	-246.793	-247.909	-246.796	-247.927	-230.781	-231.819	-230.794	-231.877	-230.797	-231.894
1.91291	27_Benzene-Pyridine_pi-pi_1.25_dimer.out	-477.559	-479.668	-477.587	-479.789			-230.781	-231.818	-230.794	-231.877	-230.797	-231.894	-246.778	-247.847	-246.793	-247.909	-246.796	-247.927	-246.779	-247.847	-246.793	-247.909	-246.796	-247.927	-230.781	-231.818	-230.794	-231.877	-230.797	-231.894
0.705302	27_Benzene-Pyridine_pi-pi_1.50_dimer.out	-477.56	-479.666	-477.587	-479.787			-230.781	-231.818	-230.794	-231.877	-230.797	-231.894	-246.778	-247.847	-246.793	-247.909	-246.796	-247.927	-246.779	-247.847	-246.793	-247.909	-246.796	-247.927	-230.781	-231.818	-230.794	-231.877	-230.797	-231.894
0.143097	27_Benzene-Pyridine_pi-pi_2.00_dimer.out	-477.56	-479.665	-477.587	-479.786			-230.781	-231.818	-230.794	-231.877	-230.797	-231.894	-246.778	-247.847	-246.793	-247.909	-246.796	-247.927	-246.778	-247.847	-246.793	-247.909	-246.796	-247.927	-230.781	-231.818	-230.794	-231.877	-230.797	-231.894
3.17801	28_Benzene-Uracil_pi-pi_0.90_dimer.out	-643.387	-646.031	-643.426	-646.195			-230.781	-231.818	-230.794	-231.877	-230.797	-231.894	-412.624	-414.206	-412.65	-414.313	-412.656	-414.345	-412.625	-414.207	-412.65	-414.313	-412.656	-414.345	-230.781	-231.82	-230.794	-231.877	-230.797	-231.894
4.92446	28_Benzene-Uracil_pi-pi_0.95_dimer.out	-643.395	-646.034	-643.434	-646.198			-230.781	-231.818	-230.794	-231.877	-230.797	-231.894	-412.624	-414.206	-412.65	-414.313	-412.656	-414.345	-412.625	-414.207	-412.65	-414.313	-412.656	-414.345	-230.781	-231.82	-230.794	-231.877	-230.797	-231.894
5.46473	28_Benzene-Uracil_pi-pi_1.00_dimer.out	-643.4	-646.034	-643.438	-646.199			-230.781	-231.818	-230.794	-231.877	-230.797	-231.894	-412.624	-414.206	-412.65	-414.313	-412.656	-414.345	-412.625	-414.207	-412.65	-414.313	-412.656	-414.345	-230.781	-231.819	-230.794	-231.877	-230.797	-231.894
5.35136	28_Benzene-Uracil_pi-pi_1.05_dimer.out	-643.403	-646.034	-643.441	-646.198			-230.781	-231.818	-230.794	-231.877	-230.797	-231.894	-412.624	-414.206	-412.65	-414.313	-412.656	-414.345	-412.625	-414.207	-412.65	-414.313	-412.656	-414.345	-230.781	-231.819	-230.794	-231.877	-230.797	-231.894
4.91567	28_Benzene-Uracil_pi-pi_1.10_dimer.out	-643.404	-646.032	-643.443	-646.197			-230.781	-231.818	-230.794	-231.877	-230.797	-231.894	-412.624	-414.206	-412.65	-414.313	-412.656	-414.345	-412.624	-414.206	-412.65	-414.313	-412.656	-414.345	-230.781	-231.819	-230.794	-231.877	-230.797	-231.894
3.20726	28_Benzene-Uracil_pi-pi_1.25_dimer.out	-643.406	-646.029	-643.445	-646.194			-230.781	-231.818	-230.794	-231.877	-230.797	-231.894	-412.624	-414.206	-412.65	-414.313	-412.656	-414.345	-412.624	-414.206	-412.65	-414.313	-412.656	-414.345	-230.781	-231.819	-230.794	-231.877	-230.797	-231.894
1.33389	28_Benzene-Uracil_pi-pi_1.50_dimer.out	-643.406	-646.026	-643.445	-646.192			-230.781	-231.818	-230.794	-231.877	-230.797	-231.894	-412.624	-414.206	-412.65	-414.313	-412.656	-414.345	-412.624	-414.206	-412.65	-414.313	-412.656	-414.345	-230.781	-231.818	-230.794	-231.877	-230.797	-231.894
0.245855	28_Benzene-Uracil_pi-pi_2.00_dimer.out	-643.405	-646.024	-643.444	-646.19			-230.781	-231.818	-230.794	-231.877	-230.797	-231.894	-412.624	-414.206	-412.65	-414.313	-412.656	-414.345	-412.624	-414.206	-412.65	-414.313	-412.656	-414.345	-230.781	-231.818	-230.794	-231.877	-230.797	-231.894
3.37441	29_Pyridine-Uracil_pi-pi_0.90_dimer.out	-659.384	-662.06	-659.423	-662.227			-246.778	-247.847	-246.793	-247.909	-246.796	-247.927	-412.624	-414.206	-412.65	-414.312	-412.655	-414.345	-412.625	-414.207	-412.65	-414.313	-412.655	-414.345	-246.779	-247.849	-246.793	-247.909	-246.796	-247.927
5.87827	29_Pyridine-Uracil_pi-pi_0.95_dimer.out	-659.394	-662.064	-659.433	-662.231			-246.778	-247.847	-246.793	-247.909	-246.796	-247.927	-412.624	-414.206	-412.65	-414.312	-412.655	-414.345	-412.624	-414.207	-412.65	-414.313	-412.655	-414.345	-246.779	-247.848	-246.793	-247.909	-246.796	-247.927
6.5763	29_Pyridine-Uracil_pi-pi_1.00_dimer.out	-659.399	-662.064	-659.439	-662.232			-246.778	-247.847	-246.793	-247.909	-246.796	-247.927	-412.624	-414.206	-412.65	-414.312	-412.655	-414.345	-412.624	-414.207	-412.65	-414.313	-412.655	-414.345	-246.779	-247.848	-246.793	-247.909	-246.796	-247.927
6.39132	29_Pyridine-Uracil_pi-pi_1.05_dimer.out	-659.402	-662.064	-659.442	-662.232			-246.778	-247.847	-246.793	-247.909	-246.796	-247.927	-412.624	-414.206	-412.65	-414.312	-412.655	-414.345	-412.624	-414.206	-412.65	-414.313	-412.655	-414.345	-246.778	-247.848	-246.793	-247.909	-246.796	-247.927
5.82038	29_Pyridine-Uracil_pi-pi_1.10_dimer.out	-659.404	-662.062	-659.444	-662.231			-246.778	-247.847	-246.793	-247.909	-246.796	-247.927	-412.624	-414.206	-412.65	-414.312	-412.655	-414.345	-412.624	-414.206	-412.65	-414.313	-412.655	-414.345	-246.778	-247.847	-246.793	-247.909	-246.796	-247.927
3.79308	29_Pyridine-Uracil_pi-pi_1.25_dimer.out	-659.405	-662.059	-659.445	-662.227			-246.778	-247.847	-246.793	-247.909	-246.796	-247.927	-412.624	-414.206	-412.65	-414.312	-412.655	-414.345	-412.624	-414.206	-412.65	-414.313	-412.655	-414.345	-246.778	-247.847	-246.793	-247.909	-246.796	-247.927
1.75215	29_Pyridine-Uracil_pi-pi_1.50_dimer.out	-659.404	-662.055	-659.444	-662.224			-246.778	-247.847	-246.793	-247.909	-246.796	-247.927	-412.624	-414.206	-412.65	-414.312	-412.655	-414.345	-412.624	-414.206	-412.65	-414.312	-412.655	-414.345	-246.778	-247.847	-246.793	-247.909	-246.796	-247.927
0.528589	29_Pyridine-Uracil_pi-pi_2.00_dimer.out	-659.403	-662.053	-659.443	-662.222	-659.452	-662.273	-246.778	-247.847	-246.793	-247.909	-246.796	-247.927	-412.624	-414.206	-412.65	-414.312	-412.655	-414.345	-412.624	-414.206	-412.65	-414.312	-412.655	-414.345	-246.778	-247.847	-246.793	-247.909	-246.796	-247.927
0.021002	30_Benzene-Ethene_0.90_dimer.out	-308.834	-310.262	-308.852	-310.341	-308.856	-310.363	-230.781	-231.818	-230.794	-231.877	-230.797	-231.894	-78.0646	-78.4426	-78.0694	-78.4633	-78.0705	-78.4693	-78.0647	-78.4432	-78.0695	-78.4636	-78.0705	-78.4693	-230.781	-231.819	-230.794	-231.877	-230.797	-231.894
0.939473	30_Benzene-Ethene_0.95_dimer.out	-308.838	-310.263	-308.856	-310.342	-308.86	-310.365	-230.781	-231.818	-230.794	-231.877	-230.797	-231.894	-78.0646	-78.4426	-78.0694	-78.4633	-78.0705	-78.4693	-78.0647	-78.4431	-78.0694	-78.4635	-78.0705	-78.4693	-230.781	-231.819	-230.794	-231.877	-230.797	-231.894
1.26853	30_Benzene-Ethene_1.00_dimer.out	-308.841	-310.263	-308.859	-310.342	-308.863	-310.365	-230.781	-231.818	-230.794	-231.877	-230.797	-231.894	-78.0646	-78.4426	-78.0694	-78.4633	-78.0705	-78.4693	-78.0646	-78.443	-78.0694	-78.4635	-78.0705	-78.4693	-230.781	-231.819	-230.794	-231.877	-230.797	-231.894
1.29209	30_Benzene-Ethene_1.05_dimer.out	-308.842	-310.263	-308.86	-310.342	-308.864	-310.365	-230.781	-231.818	-230.794	-231.877	-230.797	-231.894	-78.0646	-78.4426	-78.0694	-78.4633	-78.0705	-78.4693	-78.0646	-78.4429	-78.0694	-78.4634	-78.0705	-78.4693	-230.781	-231.818	-230.794	-231.877	-230.797	-231.894
1.17227	30_Benzene-Ethene_1.10_dimer.out	-308.843	-310.263	-308.861	-310.342	-308.865	-310.365	-230.781	-231.818	-230.794	-231.877	-230.797	-231.894	-78.0646	-78.4426	-78.0694	-78.4633	-78.0705	-78.4693	-78.0646	-78.4428	-78.0694	-78.4634	-78.0705	-78.4693	-230.781	-231.818	-230.794	-231.877	-230.797	-231.894
0.650899	30_Benzene-Ethene_1.25_dimer.out	-308.845	-310.262	-308.863	-310.341	-308.867	-310.364	-230.781	-231.818	-230.794	-231.877	-230.797	-231.894	-78.0646	-78.4426	-78.0694	-78.4633	-78.0705	-78.4693	-78.0646	-78.4427	-78.0694	-78.4634	-78.0705	-78.4693	-230.781	-231.818	-230.794	-231.877	-230.797	-231.894
0.159214	30_Benzene-Ethene_1.50_dimer.out	-308.845	-310.261	-308.863	-310.34	-308.867	-310.363	-230.781	-231.818	-230.794	-231.877	-230.797	-231.894	-78.0646	-78.4426	-78.0694	-78.4633	-78.0705	-78.4693	-78.0646	-78.4426	-78.0694	-78.4634	-78.0705	-78.4693	-230.781	-231.818	-230.794	-231.877	-230.797	-231.894
-0.0132824	30_Benzene-Ethene_2.00_dimer.out	-308.845	-310.261	-308.864	-310.34	-308.868	-310.363	-230.781	-231.818	-230.794	-231.877	-230.797	-231.894	-78.0646	-78.4426	-78.0694	-78.4633	-78.0705	-78.4693	-78.0646	-78.4426	-78.0694	-78.4633	-78.0705	-78.4693	-230.781	-231.818	-230.794	-231.877	-230.797	-231.894
2.39596	31_Uracil-Ethene_0.90_dimer.out	-490.681	-492.653	-490.712	-492.78	-490.718	-492.818	-412.624	-414.206	-412.65	-414.313	-412.656	-414.345	-78.0645	-78.4426	-78.0693	-78.4634	-78.0705	-78.4693	-78.0646	-78.4434	-78.0694	-78.4636	-78.0705	-78.4693	-412.624	-414.207	-412.65	-414.313	-412.656	-414.345
3.09153	31_Uracil-Ethene_0.95_dimer.out	-490.685	-492.654	-490.715	-492.781	-490.722	-492.819	-412.624	-414.206	-412.65	-414.313	-412.656	-414.345	-78.0645	-78.4426	-78.0693	-78.4634	-78.0705	-78.4693	-78.0646	-78.4432	-78.0694	-78.4636	-78.0705	-78.4693	-412.624	-414.206	-412.65	-414.313	-412.656	-414.345
3.25698	31_Uracil-Ethene_1.00_dimer.out	-490.687	-492.654	-490.717	-492.781	-490.724	-492.82	-412.624	-414.206	-412.65	-414.313	-412.656	-414.345	-78.0645	-78.4426	-78.0693	-78.4634	-78.0705	-78.4693	-78.0646	-78.4431	-78.0694	-78.4635	-78.0705	-78.4693	-412.624	-414.206	-412.65	-414.313	-412.656	-414.345
3.13698	31_Uracil-Ethene_1.05_dimer.out	-490.688	-492.654	-490.719	-492.781	-490.725	-492.82	-412.624	-414.206	-412.65	-414.313	-412.656	-414.345	-78.0645	-78.4426	-78.0693	-78.4634	-78.0705	-78.4693	-78.0646	-78.443	-78.0694	-78.4635	-78.0705	-78.4693	-412.624	-414.206	-412.65	-414.313	-412.656	-414.345
2.87826	31_Uracil-Ethene_1.10_dimer.out	-490.689	-492.653	-490.72	-492.781	-490.726	-492.819	-412.624	-414.206	-412.65	-414.313	-412.656	-414.345	-78.0645	-78.4426	-78.0693	-78.4634	-78.0705	-78.4693	-78.0646	-78.4429	-78.0694	-78.4634	-78.0705	-78.4693	-412.624	-414.206	-412.65	-414.313	-412.656	-414.345
1.94883	31_Uracil-Ethene_1.25_dimer.out	-490.69	-492.652	-490.72	-492.779	-490.727	-492.818	-412.624	-414.206	-412.65	-414.313	-412.656	-414.345	-78.0645	-78.4426	-78.0693	-78.4634	-78.0705	-78.4693	-78.0645	-78.4428	-78.0694	-78.4634	-78.0705	-78.4693	-412.624	-414.206	-412.65	-414.313	-412.656	-414.345
0.917883	31_Uracil-Ethene_1.50_dimer.out	-490.69	-492.65	-490.72	-492.777	-490.727	-492.816	-412.624	-414.206	-412.65	-414.313	-412.656	-414.345	-78.0645	-78.4426	-78.0693	-78.4634	-78.0705	-78.4693	-78.0645	-78.4427	-78.0694	-78.4634	-78.0705	-78.4693	-412.624	-414.206	-412.65	-414.313	-412.656	-414.345
0.250618	31_Uracil-Ethene_2.00_dimer.out	-490.689	-492.649	-490.72	-492.776	-490.726	-492.815	-412.624	-414.206	-412.65	-414.313	-412.656	-414.345	-78.0645	-78.4426	-78.0693	-78.4634	-78.0705	-78.4693	-78.0645	-78.4427	-78.0693	-78.4634	-78.0705	-78.4693	-412.624	-414.206	-412.65	-414.313	-412.656	-414.345
2.58661	32_Uracil-Ethyne_0.90_dimer.out	-489.467	-491.402	-489.497	-491.528	-489.504	-491.566	-412.624	-414.206	-412.65	-414.312	-412.656	-414.345	-76.8487	-77.1915	-76.8533	-77.2109	-76.8543	-77.2164	-76.8489	-77.1922	-76.8534	-77.2111	-76.8543	-77.2165	-412.624	-414.206	-412.65	-414.313	-412.656	-414.345
3.38713	32_Uracil-Ethyne_0.95_dimer.out	-489.471	-491.403	-489.501	-491.529	-489.507	-491.567	-412.624	-414.206	-412.65	-414.312	-412.656	-414.345	-76.8487	-77.1915	-76.8533	-77.2109	-76.8543	-77.2164	-76.8489	-77.1921	-76.8533	-77.2111	-76.8543	-77.2165	-412.624	-414.206	-412.65	-414.313	-412.656	-414.345
3.58724	32_Uracil-Ethyne_1.00_dimer.out	-489.473	-491.404	-489.503	-491.529	-489.509	-491.567	-412.624	-414.206	-412.65	-414.312	-412.656	-414.345	-76.8487	-77.1915	-76.8533	-77.2109	-76.8543	-77.2164	-76.8489	-77.192	-76.8533	-77.211	-76.8543	-77.2165	-412.624	-414.206	-412.65	-414.313	-412.656	-414.345
3.46393	32_Uracil-Ethyne_1.05_dimer.out	-489.474	-491.403	-489.504	-491.529	-489.511	-491.567	-412.624	-414.206	-412.65	-414.312	-412.656	-414.345	-76.8487	-77.1915	-76.8533	-77.2109	-76.8543	-77.2164	-76.8488	-77.1919	-76.8533	-77.211	-76.8543	-77.2165	-412.624	-414.206	-412.65	-414.313	-412.656	-414.345
3.18288	32_Uracil-Ethyne_1.10_dimer.out	-489.474	-491.403	-489.505	-491.529	-489.511	-491.567	-412.624	-414.206	-412.65	-414.312	-412.656	-414.345	-76.8487	-77.1915	-76.8533	-77.2109	-76.8543	-77.2164	-76.8488	-77.1918	-76.8533	-77.211	-76.8543	-77.2165	-412.624	-414.206	-412.65	-414.313	-412.656	-414.345
2.15864	32_Uracil-Ethyne_1.25_dimer.out	-489.475	-491.401	-489.505	-491.527	-489.511	-491.565	-412.624	-414.206	-412.65	-414.312	-412.656	-414.345	-76.8487	-77.1915	-76.8533	-77.2109	-76.8543	-77.2164	-76.8488	-77.1917	-76.8533	-77.2109	-76.8543	-77.2164	-412.624	-414.206	-412.65	-414.312	-412.656	-414.345
1.01222	32_Uracil-Ethyne_1.50_dimer.out	-489.474	-491.399	-489.504	-491.525	-489.511	-491.563	-412.624	-414.206	-412.65	-414.312	-412.656	-414.345	-76.8487	-77.1915	-76.8533	-77.2109	-76.8543	-77.2164	-76.8488	-77.1916	-76.8533	-77.2109	-76.8543	-77.2164	-412.624	-414.206	-412.65	-414.312	-412.656	-414.345
0.264394	32_Uracil-Ethyne_2.00_dimer.out	-489.473	-491.398	-489.504	-491.524	-489.51	-491.562	-412.624	-414.206	-412.65	-414.312	-412.656	-414.345	-76.8487	-77.1915	-76.8533	-77.2109	-76.8543	-77.2164	-76.8487	-77.1915	-76.8533	-77.2109	-76.8543	-77.2164	-412.624	-414.206	-412.65	-414.312	-412.656	-414.345
0.667746	33_Pyridine-Ethene_0.90_dimer.out	-324.832	-326.291	-324.851	-326.374	-324.855	-326.398	-246.779	-247.847	-246.793	-247.909	-246.796	-247.927	-78.0645	-78.4426	-78.0694	-78.4634	-78.0705	-78.4693	-78.0646	-78.4433	-78.0694	-78.4636	-78.0705	-78.4693	-246.779	-247.848	-246.793	-247.909	-246.796	-247.927
1.447	33_Pyridine-Ethene_0.95_dimer.out	-324.836	-326.292	-324.855	-326.375	-324.859	-326.399	-246.779	-247.847	-246.793	-247.909	-246.796	-247.927	-78.0645	-78.4426	-78.0694	-78.4634	-78.0705	-78.4693	-78.0646	-78.4431	-78.0694	-78.4635	-78.0705	-78.4693	-246.779	-247.847	-246.793	-247.909	-246.796	-247.927
1.72072	33_Pyridine-Ethene_1.00_dimer.out	-324.838	-326.293	-324.858	-326.375	-324.862	-326.399	-246.779	-247.847	-246.793	-247.909	-246.796	-247.927	-78.0645	-78.4426	-78.0694	-78.4634	-78.0705	-78.4693	-78.0646	-78.443	-78.0694	-78.4635	-78.0705	-78.4693	-246.779	-247.847	-246.793	-247.909	-246.796	-247.927
1.71932	33_Pyridine-Ethene_1.05_dimer.out	-324.84	-326.293	-324.859	-326.375	-324.863	-326.399	-246.779	-247.847	-246.793	-247.909	-246.796	-247.927	-78.0645	-78.4426	-78.0694	-78.4634	-78.0705	-78.4693	-78.0646	-78.4429	-78.0694	-78.4635	-78.0705	-78.4693	-246.779	-247.847	-246.793	-247.909	-246.796	-247.927
1.58095	33_Pyridine-Ethene_1.10_dimer.out	-324.841	-326.292	-324.86	-326.375	-324.864	-326.399	-246.779	-247.847	-246.793	-247.909	-246.796	-247.927	-78.0645	-78.4426	-78.0694	-78.4634	-78.0705	-78.4693	-78.0646	-78.4428	-78.0694	-78.4634	-78.0705	-78.4693	-246.779	-247.847	-246.793	-247.909	-246.796	-247.927
0.984842	33_Pyridine-Ethene_1.25_dimer.out	-324.842	-326.291	-324.861	-326.374	-324.866	-326.398	-246.779	-247.847	-246.793	-247.909	-246.796	-247.927	-78.0645	-78.4426	-78.0694	-78.4634	-78.0705	-78.4693	-78.0646	-78.4427	-78.0694	-78.4634	-78.0705	-78.4693	-246.779	-247.847	-246.793	-247.909	-246.796	-247.927
0.350189	33_Pyridine-Ethene_1.50_dimer.out	-324.843	-326.29	-324.862	-326.373	-324.866	-326.397	-246.779	-247.847	-246.793	-247.909	-246.796	-247.927	-78.0645	-78.4426	-78.0694	-78.4634	-78.0705	-78.4693	-78.0645	-78.4427	-78.0694	-78.4634	-78.0705	-78.4693	-246.779	-247.847	-246.793	-247.909	-246.796	-247.927
0.0416423	33_Pyridine-Ethene_2.00_dimer.out	-324.843	-326.289	-324.862	-326.372	-324.866	-326.397	-246.779	-247.847	-246.793	-247.909	-246.796	-247.927	-78.0645	-78.4426	-78.0694	-78.4634	-78.0705	-78.4693	-78.0645	-78.4426	-78.0694	-78.4634	-78.0705	-78.4693	-246.779	-247.847	-246.793	-247.909	-246.796	-247.927
2.7964	34_Pentane-Pentane_0.90_dimer.out	-392.796	-394.812	-392.82	-394.917	-392.825	-394.948	-196.404	-197.404	-196.416	-197.457	-196.419	-197.472	-196.404	-197.404	-196.416	-197.457	-196.419	-197.472	-196.404	-197.404	-196.416	-197.457	-196.419	-197.472	-196.404	-197.404	-196.416	-197.457	-196.419	-197.472
3.56378	34_Pentane-Pentane_0.95_dimer.out	-392.8	-394.813	-392.824	-394.919	-392.83	-394.949	-196.404	-197.404	-196.416	-197.457	-196.419	-197.472	-196.404	-197.404	-196.416	-197.457	-196.419	-197.472	-196.404	-197.404	-196.416	-197.457	-196.419	-197.472	-196.404	-197.404	-196.416	-197.457	-196.419	-197.472
3.72259	34_Pentane-Pentane_1.00_dimer.out	-392.803	-394.813	-392.827	-394.919	-392.833	-394.95	-196.404	-197.404	-196.416	-197.457	-196.419	-197.472	-196.404	-197.404	-196.416	-197.457	-196.419	-197.472	-196.404	-197.404	-196.416	-197.457	-196.419	-197.472	-196.404	-197.404	-196.416	-197.457	-196.419	-197.472
3.56736	34_Pentane-Pentane_1.05_dimer.out	-392.805	-394.813	-392.829	-394.919	-392.835	-394.949	-196.404	-197.404	-196.416	-197.457	-196.419	-197.472	-196.404	-197.404	-196.416	-197.457	-196.419	-197.472	-196.404	-197.404	-196.416	-197.457	-196.419	-197.472	-196.404	-197.404	-196.416	-197.457	-196.419	-197.472
3.26495	34_Pentane-Pentane_1.10_dimer.out	-392.806	-394.812	-392.83	-394.918	-392.836	-394.949	-196.404	-197.404	-196.416	-197.457	-196.419	-197.472	-196.404	-197.404	-196.416	-197.457	-196.419	-197.472	-196.404	-197.404	-196.416	-197.457	-196.419	-197.472	-196.404	-197.404	-196.416	-197.457	-196.419	-197.472
2.21088	34_Pentane-Pentane_1.25_dimer.out	-392.808	-394.811	-392.832	-394.917	-392.837	-394.947	-196.404	-197.404	-196.416	-197.457	-196.419	-197.472	-196.404	-197.404	-196.416	-197.457	-196.419	-197.472	-196.404	-197.404	-196.416	-197.457	-196.419	-197.472	-196.404	-197.404	-196.416	-197.457	-196.419	-197.472
1.03869	34_Pentane-Pentane_1.50_dimer.out	-392.808	-394.809	-392.832	-394.915	-392.838	-394.945	-196.404	-197.404	-196.416	-197.457	-196.419	-197.472	-196.404	-197.404	-196.416	-197.457	-196.419	-197.472	-196.404	-197.404	-196.416	-197.457	-196.419	-197.472	-196.404	-197.404	-196.416	-197.457	-196.419	-197.472
0.262657	34_Pentane-Pentane_2.00_dimer.out	-392.808	-394.808	-392.832	-394.914	-392.838	-394.944	-196.404	-197.404	-196.416	-197.457	-196.419	-197.472	-196.404	-197.404	-196.416	-197.457	-196.419	-197.472	-196.404	-197.404	-196.416	-197.457	-196.419	-197.472	-196.404	-197.404	-196.416	-197.457	-196.419	-197.472
1.82214	35_Neopentane-Pentane_0.90_dimer.out	-392.799	-394.817	-392.823	-394.922	-392.829	-394.953	-196.404	-197.404	-196.416	-197.457	-196.419	-197.472	-196.404	-197.41	-196.416	-197.463	-196.419	-197.478	-196.404	-197.411	-196.416	-197.463	-196.419	-197.478	-196.404	-197.404	-196.416	-197.457	-196.419	-197.472
2.46012	35_Neopentane-Pentane_0.95_dimer.out	-392.803	-394.818	-392.827	-394.923	-392.833	-394.954	-196.404	-197.404	-196.416	-197.457	-196.419	-197.472	-196.404	-197.41	-196.416	-197.463	-196.419	-197.478	-196.404	-197.41	-196.416	-197.463	-196.419	-197.478	-196.404	-197.404	-196.416	-197.457	-196.419	-197.472
2.57959	35_Neopentane-Pentane_1.00_dimer.out	-392.805	-394.818	-392.829	-394.923	-392.835	-394.954	-196.404	-197.404	-196.416	-197.457	-196.419	-197.472	-196.404	-197.41	-196.416	-197.463	-196.419	-197.478	-196.404	-197.41	-196.416	-197.463	-196.419	-197.478	-196.404	-197.404	-196.416	-197.457	-196.419	-197.472
2.45554	35_Neopentane-Pentane_1.05_dimer.out	-392.806	-394.818	-392.83	-394.923	-392.836	-394.954	-196.404	-197.404	-196.416	-197.457	-196.419	-197.472	-196.404	-197.41	-196.416	-197.463	-196.419	-197.478	-196.404	-197.41	-196.416	-197.463	-196.419	-197.478	-196.404	-197.404	-196.416	-197.457	-196.419	-197.472
2.22804	35_Neopentane-Pentane_1.10_dimer.out	-392.807	-394.817	-392.831	-394.923	-392.837	-394.953	-196.404	-197.404	-196.416	-197.457	-196.419	-197.472	-196.404	-197.41	-196.416	-197.463	-196.419	-197.478	-196.404	-197.41	-196.416	-197.463	-196.419	-197.478	-196.404	-197.404	-196.416	-197.457	-196.419	-197.472
1.47908	35_Neopentane-Pentane_1.25_dimer.out	-392.808	-394.816	-392.832	-394.922	-392.838	-394.952	-196.404	-197.404	-196.416	-197.457	-196.419	-197.472	-196.404	-197.41	-196.416	-197.463	-196.419	-197.478	-196.404	-197.41	-196.416	-197.463	-196.419	-197.478	-196.404	-197.404	-196.416	-197.457	-196.419	-197.472
0.689927	35_Neopentane-Pentane_1.50_dimer.out	-392.808	-394.815	-392.832	-394.92	-392.838	-394.951	-196.404	-197.404	-196.416	-197.457	-196.419	-197.472	-196.404	-197.41	-196.416	-197.463	-196.419	-197.478	-196.404	-197.41	-196.416	-197.463	-196.419	-197.478	-196.404	-197.404	-196.416	-197.457	-196.419	-197.472
0.184665	35_Neopentane-Pentane_2.00_dimer.out	-392.808	-394.814	-392.832	-394.919	-392.838	-394.95	-196.404	-197.404	-196.416	-197.457	-196.419	-197.472	-196.404	-197.41	-196.416	-197.463	-196.419	-197.478	-196.404	-197.41	-196.416	-197.463	-196.419	-197.478	-196.404	-197.404	-196.416	-197.457	-196.419	-197.472
1.42522	36_Neopentane-Neopentane_0.90_dimer.out	-392.803	-394.823	-392.827	-394.927	-392.833	-394.958	-196.404	-197.41	-196.416	-197.463	-196.419	-197.478	-196.404	-197.41	-196.416	-197.463	-196.419	-197.478	-196.404	-197.41	-196.416	-197.463	-196.419	-197.478	-196.404	-197.41	-196.416	-197.463	-196.419	-197.478
1.70454	36_Neopentane-Neopentane_0.95_dimer.out	-392.805	-394.823	-392.829	-394.928	-392.835	-394.958	-196.404	-197.41	-196.416	-197.463	-196.419	-197.478	-196.404	-197.41	-196.416	-197.463	-196.419	-197.478	-196.404	-197.41	-196.416	-197.463	-196.419	-197.478	-196.404	-197.41	-196.416	-197.463	-196.419	-197.478
1.74209	36_Neopentane-Neopentane_1.00_dimer.out	-392.806	-394.823	-392.83	-394.928	-392.836	-394.958	-196.404	-197.41	-196.416	-197.463	-196.419	-197.478	-196.404	-197.41	-196.416	-197.463	-196.419	-197.478	-196.404	-197.41	-196.416	-197.463	-196.419	-197.478	-196.404	-197.41	-196.416	-197.463	-196.419	-197.478
1.62466	36_Neopentane-Neopentane_1.05_dimer.out	-392.807	-394.823	-392.831	-394.928	-392.837	-394.958	-196.404	-197.41	-196.416	-197.463	-196.419	-197.478	-196.404	-197.41	-196.416	-197.463	-196.419	-197.478	-196.404	-197.41	-196.416	-197.463	-196.419	-197.478	-196.404	-197.41	-196.416	-197.463	-196.419	-197.478
1.5021	36_Neopentane-Neopentane_1.10_dimer.out	-392.807	-394.823	-392.832	-394.928	-392.837	-394.958	-196.404	-197.41	-196.416	-197.463	-196.419	-197.478	-196.404	-197.41	-196.416	-197.463	-196.419	-197.478	-196.404	-197.41	-196.416	-197.463	-196.419	-197.478	-196.404	-197.41	-196.416	-197.463	-196.419	-197.478
1.01832	36_Neopentane-Neopentane_1.25_dimer.out	-392.808	-394.822	-392.832	-394.927	-392.838	-394.957	-196.404	-197.41	-196.416	-197.463	-196.419	-197.478	-196.404	-197.41	-196.416	-197.463	-196.419	-197.478	-196.404	-197.41	-196.416	-197.463	-196.419	-197.478	-196.404	-197.41	-196.416	-197.463	-196.419	-197.478
0.497189	36_Neopentane-Neopentane_1.50_dimer.out	-392.808	-394.821	-392.833	-394.926	-392.838	-394.956	-196.404	-197.41	-196.416	-197.463	-196.419	-197.478	-196.404	-197.41	-196.416	-197.463	-196.419	-197.478	-196.404	-197.41	-196.416	-197.463	-196.419	-197.478	-196.404	-197.41	-196.416	-197.463	-196.419	-197.478
0.13246	36_Neopentane-Neopentane_2.00_dimer.out	-392.808	-394.821	-392.833	-394.925	-392.838	-394.956	-196.404	-197.41	-196.416	-197.463	-196.419	-197.478	-196.404	-197.41	-196.416	-197.463	-196.419	-197.478	-196.404	-197.41	-196.416	-197.463	-196.419	-197.478	-196.404	-197.41	-196.416	-197.463	-196.419	-197.478
1.57585	37_Cyclopentane-Neopentane_0.90_dimer.out	-391.625	-393.608	-391.648	-393.712	-391.654	-393.742	-195.23	-196.195	-195.242	-196.247	-195.244	-196.262	-196.404	-197.41	-196.416	-197.463	-196.419	-197.478	-196.404	-197.411	-196.416	-197.463	-196.419	-197.478	-195.23	-196.195	-195.242	-196.247	-195.244	-196.262
2.21712	37_Cyclopentane-Neopentane_0.95_dimer.out	-391.628	-393.609	-391.652	-393.713	-391.658	-393.743	-195.23	-196.195	-195.242	-196.247	-195.244	-196.262	-196.404	-197.41	-196.416	-197.463	-196.419	-197.478	-196.404	-197.41	-196.416	-197.463	-196.419	-197.478	-195.23	-196.195	-195.242	-196.247	-195.244	-196.262
2.37278	37_Cyclopentane-Neopentane_1.00_dimer.out	-391.63	-393.609	-391.654	-393.713	-391.66	-393.743	-195.23	-196.195	-195.242	-196.247	-195.244	-196.262	-196.404	-197.41	-196.416	-197.463	-196.419	-197.478	-196.404	-197.41	-196.416	-197.463	-196.419	-197.478	-195.23	-196.195	-195.242	-196.247	-195.244	-196.262
2.29461	37_Cyclopentane-Neopentane_1.05_dimer.out	-391.632	-393.609	-391.656	-393.713	-391.661	-393.743	-195.23	-196.195	-195.242	-196.247	-195.244	-196.262	-196.404	-197.41	-196.416	-197.463	-196.419	-197.478	-196.404	-197.41	-196.416	-197.463	-196.419	-197.478	-195.23	-196.195	-195.242	-196.247	-195.244	-196.262
2.11081	37_Cyclopentane-Neopentane_1.10_dimer.out	-391.633	-393.609	-391.656	-393.713	-391.662	-393.743	-195.23	-196.195	-195.242	-196.247	-195.244	-196.262	-196.404	-197.41	-196.416	-197.463	-196.419	-197.478	-196.404	-197.41	-196.416	-197.463	-196.419	-197.478	-195.23	-196.195	-195.242	-196.247	-195.244	-196.262
1.44924	37_Cyclopentane-Neopentane_1.25_dimer.out	-391.634	-393.608	-391.658	-393.712	-391.663	-393.742	-195.23	-196.195	-195.242	-196.247	-195.244	-196.262	-196.404	-197.41	-196.416	-197.463	-196.419	-197.478	-196.404	-197.41	-196.416	-197.463	-196.419	-197.478	-195.23	-196.195	-195.242	-196.247	-195.244	-196.262
0.698891	37_Cyclopentane-Neopentane_1.50_dimer.out	-391.634	-393.606	-391.658	-393.711	-391.663	-393.741	-195.23	-196.195	-195.242	-196.247	-195.244	-196.262	-196.404	-197.41	-196.416	-197.463	-196.419	-197.478	-196.404	-197.41	-196.416	-197.463	-196.419	-197.478	-195.23	-196.195	-195.242	-196.247	-195.244	-196.262
0.188656	37_Cyclopentane-Neopentane_2.00_dimer.out	-391.634	-393.606	-391.658	-393.71	-391.664	-393.74	-195.23	-196.195	-195.242	-196.247	-195.244	-196.262	-196.404	-197.41	-196.416	-197.463	-196.419	-197.478	-196.404	-197.41	-196.416	-197.463	-196.419	-197.478	-195.23	-196.195	-195.242	-196.247	-195.244	-196.262
2.19808	38_Cyclopentane-Cyclopentane_0.90_dimer.out	-390.45	-392.394	-390.473	-392.497	-390.479	-392.527	-195.23	-196.195	-195.242	-196.247	-195.244	-196.262	-195.23	-196.195	-195.242	-196.247	-195.244	-196.262	-195.23	-196.196	-195.242	-196.247	-195.244	-196.262	-195.23	-196.196	-195.242	-196.247	-195.244	-196.262
2.80041	38_Cyclopentane-Cyclopentane_0.95_dimer.out	-390.453	-392.395	-390.477	-392.498	-390.482	-392.528	-195.23	-196.195	-195.242	-196.247	-195.244	-196.262	-195.23	-196.195	-195.242	-196.247	-195.244	-196.262	-195.23	-196.195	-195.242	-196.247	-195.244	-196.262	-195.23	-196.195	-195.242	-196.247	-195.244	-196.262
2.95617	38_Cyclopentane-Cyclopentane_1.00_dimer.out	-390.456	-392.395	-390.479	-392.498	-390.485	-392.528	-195.23	-196.195	-195.242	-196.247	-195.244	-196.262	-195.23	-196.195	-195.242	-196.247	-195.244	-196.262	-195.23	-196.195	-195.242	-196.247	-195.244	-196.262	-195.23	-196.195	-195.242	-196.247	-195.244	-196.262
2.82352	38_Cyclopentane-Cyclopentane_1.05_dimer.out	-390.457	-392.395	-390.481	-392.498	-390.486	-392.528	-195.23	-196.195	-195.242	-196.247	-195.244	-196.262	-195.23	-196.195	-195.242	-196.247	-195.244	-196.262	-195.23	-196.195	-195.242	-196.247	-195.244	-196.262	-195.23	-196.195	-195.242	-196.247	-195.244	-196.262
2.56285	38_Cyclopentane-Cyclopentane_1.10_dimer.out	-390.458	-392.394	-390.482	-392.498	-390.487	-392.528	-195.23	-196.195	-195.242	-196.247	-195.244	-196.262	-195.23	-196.195	-195.242	-196.247	-195.244	-196.262	-195.23	-196.195	-195.242	-196.247	-195.244	-196.262	-195.23	-196.195	-195.242	-196.247	-195.244	-196.262
1.69325	38_Cyclopentane-Cyclopentane_1.25_dimer.out	-390.459	-392.393	-390.483	-392.496	-390.488	-392.526	-195.23	-196.195	-195.242	-196.247	-195.244	-196.262	-195.23	-196.195	-195.242	-196.247	-195.244	-196.262	-195.23	-196.195	-195.242	-196.247	-195.244	-196.262	-195.23	-196.195	-195.242	-196.247	-195.244	-196.262
0.780367	38_Cyclopentane-Cyclopentane_1.50_dimer.out	-390.46	-392.391	-390.483	-392.495	-390.488	-392.525	-195.23	-196.195	-195.242	-196.247	-195.244	-196.262	-195.23	-196.195	-195.242	-196.247	-195.244	-196.262	-195.23	-196.195	-195.242	-196.247	-195.244	-196.262	-195.23	-196.195	-195.242	-196.247	-195.244	-196.262
0.200665	38_Cyclopentane-Cyclopentane_2.00_dimer.out	-390.46	-392.39	-390.483	-392.494	-390.489	-392.524	-195.23	-196.195	-195.242	-196.247	-195.244	-196.262	-195.23	-196.195	-195.242	-196.247	-195.244	-196.262	-195.23	-196.195	-195.242	-196.247	-195.244	-196.262	-195.23	-196.195	-195.242	-196.247	-195.244	-196.262
1.9687	39_Benzene-Cyclopentane_0.90_dimer.out	-425.997	-428.017	-426.022	-428.127			-230.781	-231.818	-230.794	-231.877	-230.797	-231.894	-195.23	-196.195	-195.242	-196.247	-195.244	-196.262	-195.23	-196.196	-195.242	-196.247	-195.244	-196.262	-230.781	-231.819	-230.794	-231.877	-230.797	-231.894
3.08098	39_Benzene-Cyclopentane_0.95_dimer.out	-426.003	-428.019	-426.028	-428.129			-230.781	-231.818	-230.794	-231.877	-230.797	-231.894	-195.23	-196.195	-195.242	-196.247	-195.244	-196.262	-195.23	-196.196	-195.242	-196.247	-195.244	-196.262	-230.781	-231.819	-230.794	-231.877	-230.797	-231.894
3.43781	39_Benzene-Cyclopentane_1.00_dimer.out	-426.006	-428.019	-426.031	-428.129	-426.036	-428.161	-230.781	-231.818	-230.794	-231.877	-230.797	-231.894	-195.23	-196.195	-195.242	-196.247	-195.244	-196.262	-195.23	-196.195	-195.242	-196.247	-195.244	-196.262	-230.781	-231.819	-230.794	-231.877	-230.797	-231.894
3.36393	39_Benzene-Cyclopentane_1.05_dimer.out	-426.008	-428.019	-426.033	-428.129	-426.039	-428.161	-230.781	-231.818	-230.794	-231.877	-230.797	-231.894	-195.23	-196.195	-195.242	-196.247	-195.244	-196.262	-195.23	-196.195	-195.242	-196.247	-195.244	-196.262	-230.781	-231.819	-230.794	-231.877	-230.797	-231.894
3.08312	39_Benzene-Cyclopentane_1.10_dimer.out	-426.009	-428.018	-426.034	-428.129	-426.04	-428.161	-230.781	-231.818	-230.794	-231.877	-230.797	-231.894	-195.23	-196.195	-195.242	-196.247	-195.244	-196.262	-195.23	-196.195	-195.242	-196.247	-195.244	-196.262	-230.781	-231.819	-230.794	-231.877	-230.797	-231.894
2.02564	39_Benzene-Cyclopentane_1.25_dimer.out	-426.011	-428.017	-426.036	-428.127	-426.041	-428.159	-230.781	-231.818	-230.794	-231.877	-230.797	-231.894	-195.23	-196.195	-195.242	-196.247	-195.244	-196.262	-195.23	-196.195	-195.242	-196.247	-195.244	-196.262	-230.781	-231.818	-230.794	-231.877	-230.797	-231.894
0.88369	39_Benzene-Cyclopentane_1.50_dimer.out	-426.011	-428.015	-426.036	-428.125	-426.042	-428.157	-230.781	-231.818	-230.794	-231.877	-230.797	-231.894	-195.23	-196.195	-195.242	-196.247	-195.244	-196.262	-195.23	-196.195	-195.242	-196.247	-195.244	-196.262	-230.781	-231.818	-230.794	-231.877	-230.797	-231.894
0.188667	39_Benzene-Cyclopentane_2.00_dimer.out	-426.011	-428.013	-426.036	-428.124	-426.042	-428.156	-230.781	-231.818	-230.794	-231.877	-230.797	-231.894	-195.23	-196.195	-195.242	-196.247	-195.244	-196.262	-195.23	-196.195	-195.242	-196.247	-195.244	-196.262	-230.781	-231.818	-230.794	-231.877	-230.797	-231.894
1.7119	40_Benzene-Neopentane_0.90_dimer.out	-427.175	-429.232	-427.201	-429.342			-230.781	-231.818	-230.794	-231.877	-230.797	-231.894	-196.404	-197.41	-196.416	-197.463	-196.419	-197.478	-196.404	-197.411	-196.416	-197.463	-196.419	-197.478	-230.781	-231.819	-230.794	-231.877	-230.797	-231.894
2.54891	40_Benzene-Neopentane_0.95_dimer.out	-427.179	-429.233	-427.205	-429.344			-230.781	-231.818	-230.794	-231.877	-230.797	-231.894	-196.404	-197.41	-196.416	-197.463	-196.419	-197.478	-196.404	-197.41	-196.416	-197.463	-196.419	-197.478	-230.781	-231.819	-230.794	-231.877	-230.797	-231.894
2.79053	40_Benzene-Neopentane_1.00_dimer.out	-427.182	-429.233	-427.207	-429.344			-230.781	-231.818	-230.794	-231.877	-230.797	-231.894	-196.404	-197.41	-196.416	-197.463	-196.419	-197.478	-196.404	-197.41	-196.416	-197.463	-196.419	-197.478	-230.781	-231.819	-230.794	-231.877	-230.797	-231.894
2.72088	40_Benzene-Neopentane_1.05_dimer.out	-427.183	-429.233	-427.209	-429.344	-427.214	-429.376	-230.781	-231.818	-230.794	-231.877	-230.797	-231.894	-196.404	-197.41	-196.416	-197.463	-196.419	-197.478	-196.404	-197.41	-196.416	-197.463	-196.419	-197.478	-230.781	-231.819	-230.794	-231.877	-230.797	-231.894
2.5023	40_Benzene-Neopentane_1.10_dimer.out	-427.184	-429.233	-427.21	-429.344	-427.215	-429.376	-230.781	-231.818	-230.794	-231.877	-230.797	-231.894	-196.404	-197.41	-196.416	-197.463	-196.419	-197.478	-196.404	-197.41	-196.416	-197.463	-196.419	-197.478	-230.781	-231.819	-230.794	-231.877	-230.797	-231.894
1.67429	40_Benzene-Neopentane_1.25_dimer.out	-427.185	-429.231	-427.211	-429.342	-427.216	-429.374	-230.781	-231.818	-230.794	-231.877	-230.797	-231.894	-196.404	-197.41	-196.416	-197.463	-196.419	-197.478	-196.404	-197.41	-196.416	-197.463	-196.419	-197.478	-230.781	-231.818	-230.794	-231.877	-230.797	-231.894
0.762121	40_Benzene-Neopentane_1.50_dimer.out	-427.185	-429.23	-427.211	-429.341	-427.217	-429.373	-230.781	-231.818	-230.794	-231.877	-230.797	-231.894	-196.404	-197.41	-196.416	-197.463	-196.419	-197.478	-196.404	-197.41	-196.416	-197.463	-196.419	-197.478	-230.781	-231.818	-230.794	-231.877	-230.797	-231.894
0.186544	40_Benzene-Neopentane_2.00_dimer.out	-427.185	-429.229	-427.211	-429.34	-427.216	-429.372	-230.781	-231.818	-230.794	-231.877	-230.797	-231.894	-196.404	-197.41	-196.416	-197.463	-196.419	-197.478	-196.404	-197.41	-196.416	-197.463	-196.419	-197.478	-230.781	-231.818	-230.794	-231.877	-230.797	-231.894
3.67913	41_Uracil-Pentane_0.90_dimer.out	-609.015	-611.616	-609.053	-611.775			-412.624	-414.206	-412.65	-414.313	-412.656	-414.345	-196.404	-197.404	-196.416	-197.457	-196.419	-197.472	-196.404	-197.405	-196.416	-197.457	-196.419	-197.472	-412.625	-414.207	-412.65	-414.313	-412.656	-414.345
4.56038	41_Uracil-Pentane_0.95_dimer.out	-609.02	-611.617	-609.058	-611.777			-412.624	-414.206	-412.65	-414.313	-412.656	-414.345	-196.404	-197.404	-196.416	-197.457	-196.419	-197.472	-196.404	-197.404	-196.416	-197.457	-196.419	-197.472	-412.625	-414.207	-412.65	-414.313	-412.656	-414.345
4.72406	41_Uracil-Pentane_1.00_dimer.out	-609.024	-611.618	-609.061	-611.777			-412.624	-414.206	-412.65	-414.313	-412.656	-414.345	-196.404	-197.404	-196.416	-197.457	-196.419	-197.472	-196.404	-197.404	-196.416	-197.457	-196.419	-197.472	-412.625	-414.207	-412.65	-414.313	-412.656	-414.345
4.50168	41_Uracil-Pentane_1.05_dimer.out	-609.026	-611.617	-609.063	-611.776	-609.072	-611.824	-412.624	-414.206	-412.65	-414.313	-412.656	-414.345	-196.404	-197.404	-196.416	-197.457	-196.419	-197.472	-196.404	-197.404	-196.416	-197.457	-196.419	-197.472	-412.625	-414.206	-412.65	-414.313	-412.656	-414.345
3.99925	41_Uracil-Pentane_1.10_dimer.out	-609.027	-611.616	-609.065	-611.776	-609.073	-611.823	-412.624	-414.206	-412.65	-414.313	-412.656	-414.345	-196.404	-197.404	-196.416	-197.457	-196.419	-197.472	-196.404	-197.404	-196.416	-197.457	-196.419	-197.472	-412.624	-414.206	-412.65	-414.313	-412.656	-414.345
2.40241	41_Uracil-Pentane_1.25_dimer.out	-609.028	-611.613	-609.066	-611.773	-609.074	-611.821	-412.624	-414.206	-412.65	-414.313	-412.656	-414.345	-196.404	-197.404	-196.416	-197.457	-196.419	-197.472	-196.404	-197.404	-196.416	-197.457	-196.419	-197.472	-412.624	-414.206	-412.65	-414.313	-412.656	-414.345
0.961312	41_Uracil-Pentane_1.50_dimer.out	-609.028	-611.611	-609.066	-611.771	-609.075	-611.819	-412.624	-414.206	-412.65	-414.313	-412.656	-414.345	-196.404	-197.404	-196.416	-197.457	-196.419	-197.472	-196.404	-197.404	-196.416	-197.457	-196.419	-197.472	-412.624	-414.206	-412.65	-414.313	-412.656	-414.345
0.212103	41_Uracil-Pentane_2.00_dimer.out	-609.028	-611.61	-609.066	-611.769	-609.075	-611.817	-412.624	-414.206	-412.65	-414.313	-412.656	-414.345	-196.404	-197.404	-196.416	-197.457	-196.419	-197.472	-196.404	-197.404	-196.416	-197.457	-196.419	-197.472	-412.624	-414.206	-412.65	-414.313	-412.656	-414.345
2.89976	42_Uracil-Cyclopentane_0.90_dimer.out	-607.842	-610.407	-607.879	-610.564			-412.624	-414.206	-412.65	-414.313	-412.656	-414.345	-195.23	-196.195	-195.242	-196.247	-195.244	-196.262	-195.23	-196.196	-195.242	-196.247	-195.244	-196.262	-412.625	-414.207	-412.65	-414.313	-412.656	-414.345
3.83639	42_Uracil-Cyclopentane_0.95_dimer.out	-607.847	-610.408	-607.884	-610.566	-607.892	-610.613	-412.624	-414.206	-412.65	-414.313	-412.656	-414.345	-195.23	-196.195	-195.242	-196.247	-195.244	-196.262	-195.23	-196.196	-195.242	-196.247	-195.244	-196.262	-412.625	-414.207	-412.65	-414.313	-412.656	-414.345
4.01859	42_Uracil-Cyclopentane_1.00_dimer.out	-607.85	-610.408	-607.887	-610.566	-607.895	-610.614	-412.624	-414.206	-412.65	-414.313	-412.656	-414.345	-195.23	-196.195	-195.242	-196.247	-195.244	-196.262	-195.23	-196.195	-195.242	-196.247	-195.244	-196.262	-412.625	-414.206	-412.65	-414.313	-412.656	-414.345
3.82252	42_Uracil-Cyclopentane_1.05_dimer.out	-607.852	-610.407	-607.889	-610.566	-607.897	-610.613	-412.624	-414.206	-412.65	-414.313	-412.656	-414.345	-195.23	-196.195	-195.242	-196.247	-195.244	-196.262	-195.23	-196.195	-195.242	-196.247	-195.244	-196.262	-412.625	-414.206	-412.65	-414.313	-412.656	-414.345
3.45872	42_Uracil-Cyclopentane_1.10_dimer.out	-607.853	-610.407	-607.89	-610.565	-607.898	-610.613	-412.624	-414.206	-412.65	-414.313	-412.656	-414.345	-195.23	-196.195	-195.242	-196.247	-195.244	-196.262	-195.23	-196.195	-195.242	-196.247	-195.244	-196.262	-412.624	-414.206	-412.65	-414.313	-412.656	-414.345
2.2488	42_Uracil-Cyclopentane_1.25_dimer.out	-607.854	-610.405	-607.891	-610.563	-607.9	-610.611	-412.624	-414.206	-412.65	-414.313	-412.656	-414.345	-195.23	-196.195	-195.242	-196.247	-195.244	-196.262	-195.23	-196.195	-195.242	-196.247	-195.244	-196.262	-412.624	-414.206	-412.65	-414.313	-412.656	-414.345
1.00044	42_Uracil-Cyclopentane_1.50_dimer.out	-607.854	-610.402	-607.892	-610.561	-607.9	-610.609	-412.624	-414.206	-412.65	-414.313	-412.656	-414.345	-195.23	-196.195	-195.242	-196.247	-195.244	-196.262	-195.23	-196.195	-195.242	-196.247	-195.244	-196.262	-412.624	-414.206	-412.65	-414.313	-412.656	-414.345
0.24558	42_Uracil-Cyclopentane_2.00_dimer.out	-607.854	-610.401	-607.892	-610.56	-607.9	-610.608	-412.624	-414.206	-412.65	-414.313	-412.656	-414.345	-195.23	-196.195	-195.242	-196.247	-195.244	-196.262	-195.23	-196.195	-195.242	-196.247	-195.244	-196.262	-412.624	-414.206	-412.65	-414.313	-412.656	-414.345
2.75624	43_Uracil-Neopentane_0.90_dimer.out	-609.02	-611.621	-609.057	-611.78			-412.624	-414.206	-412.65	-414.313	-412.656	-414.345	-196.404	-197.41	-196.416	-197.463	-196.419	-197.478	-196.404	-197.411	-196.416	-197.463	-196.419	-197.478	-412.625	-414.207	-412.65	-414.313	-412.656	-414.345
3.49966	43_Uracil-Neopentane_0.95_dimer.out	-609.024	-611.622	-609.061	-611.781	-609.07	-611.829	-412.624	-414.206	-412.65	-414.313	-412.656	-414.345	-196.404	-197.41	-196.416	-197.463	-196.419	-197.478	-196.404	-197.411	-196.416	-197.463	-196.419	-197.478	-412.624	-414.206	-412.65	-414.313	-412.656	-414.345
3.61265	43_Uracil-Neopentane_1.00_dimer.out	-609.026	-611.622	-609.064	-611.781	-609.072	-611.829	-412.624	-414.206	-412.65	-414.313	-412.656	-414.345	-196.404	-197.41	-196.416	-197.463	-196.419	-197.478	-196.404	-197.41	-196.416	-197.463	-196.419	-197.478	-412.624	-414.206	-412.65	-414.313	-412.656	-414.345
3.4152	43_Uracil-Neopentane_1.05_dimer.out	-609.027	-611.622	-609.065	-611.781	-609.073	-611.828	-412.624	-414.206	-412.65	-414.313	-412.656	-414.345	-196.404	-197.41	-196.416	-197.463	-196.419	-197.478	-196.404	-197.41	-196.416	-197.463	-196.419	-197.478	-412.624	-414.206	-412.65	-414.313	-412.656	-414.345
3.0833	43_Uracil-Neopentane_1.10_dimer.out	-609.028	-611.621	-609.066	-611.78	-609.074	-611.828	-412.624	-414.206	-412.65	-414.313	-412.656	-414.345	-196.404	-197.41	-196.416	-197.463	-196.419	-197.478	-196.404	-197.41	-196.416	-197.463	-196.419	-197.478	-412.624	-414.206	-412.65	-414.313	-412.656	-414.345
2.01329	43_Uracil-Neopentane_1.25_dimer.out	-609.029	-611.619	-609.067	-611.778	-609.075	-611.826	-412.624	-414.206	-412.65	-414.313	-412.656	-414.345	-196.404	-197.41	-196.416	-197.463	-196.419	-197.478	-196.404	-197.41	-196.416	-197.463	-196.419	-197.478	-412.624	-414.206	-412.65	-414.313	-412.656	-414.345
0.912106	43_Uracil-Neopentane_1.50_dimer.out	-609.029	-611.617	-609.067	-611.777	-609.075	-611.824	-412.624	-414.206	-412.65	-414.313	-412.656	-414.345	-196.404	-197.41	-196.416	-197.463	-196.419	-197.478	-196.404	-197.41	-196.416	-197.463	-196.419	-197.478	-412.624	-414.206	-412.65	-414.313	-412.656	-414.345
0.228658	43_Uracil-Neopentane_2.00_dimer.out	-609.028	-611.616	-609.066	-611.776	-609.075	-611.823	-412.624	-414.206	-412.65	-414.313	-412.656	-414.345	-196.404	-197.41	-196.416	-197.463	-196.419	-197.478	-196.404	-197.41	-196.416	-197.463	-196.419	-197.478	-412.624	-414.206	-412.65	-414.313	-412.656	-414.345
1.59748	44_Ethene-Pentane_0.90_dimer.out	-274.463	-275.849	-274.479	-275.922	-274.483	-275.944	-78.0645	-78.4426	-78.0694	-78.4634	-78.0705	-78.4693	-196.404	-197.404	-196.416	-197.457	-196.419	-197.472	-196.404	-197.404	-196.416	-197.457	-196.419	-197.472	-78.0646	-78.4429	-78.0694	-78.4635	-78.0705	-78.4693
1.91823	44_Ethene-Pentane_0.95_dimer.out	-274.465	-275.849	-274.482	-275.923	-274.486	-275.944	-78.0645	-78.4426	-78.0694	-78.4634	-78.0705	-78.4693	-196.404	-197.404	-196.416	-197.457	-196.419	-197.472	-196.404	-197.404	-196.416	-197.457	-196.419	-197.472	-78.0646	-78.4428	-78.0694	-78.4634	-78.0705	-78.4693
1.94265	44_Ethene-Pentane_1.00_dimer.out	-274.466	-275.849	-274.483	-275.923	-274.487	-275.944	-78.0645	-78.4426	-78.0694	-78.4634	-78.0705	-78.4693	-196.404	-197.404	-196.416	-197.457	-196.419	-197.472	-196.404	-197.404	-196.416	-197.457	-196.419	-197.472	-78.0646	-78.4428	-78.0694	-78.4634	-78.0705	-78.4693
1.82187	44_Ethene-Pentane_1.05_dimer.out	-274.467	-275.849	-274.484	-275.923	-274.488	-275.944	-78.0645	-78.4426	-78.0694	-78.4634	-78.0705	-78.4693	-196.404	-197.404	-196.416	-197.457	-196.419	-197.472	-196.404	-197.404	-196.416	-197.457	-196.419	-197.472	-78.0646	-78.4428	-78.0694	-78.4634	-78.0705	-78.4693
1.63925	44_Ethene-Pentane_1.10_dimer.out	-274.468	-275.849	-274.485	-275.923	-274.489	-275.944	-78.0645	-78.4426	-78.0694	-78.4634	-78.0705	-78.4693	-196.404	-197.404	-196.416	-197.457	-196.419	-197.472	-196.404	-197.404	-196.416	-197.457	-196.419	-197.472	-78.0646	-78.4428	-78.0694	-78.4634	-78.0705	-78.4693
1.06878	44_Ethene-Pentane_1.25_dimer.out	-274.468	-275.848	-274.485	-275.922	-274.489	-275.943	-78.0645	-78.4426	-78.0694	-78.4634	-78.0705	-78.4693	-196.404	-197.404	-196.416	-197.457	-196.419	-197.472	-196.404	-197.404	-196.416	-197.457	-196.419	-197.472	-78.0646	-78.4427	-78.0694	-78.4634	-78.0705	-78.4693
0.481353	44_Ethene-Pentane_1.50_dimer.out	-274.469	-275.847	-274.486	-275.921	-274.49	-275.942	-78.0645	-78.4426	-78.0694	-78.4634	-78.0705	-78.4693	-196.404	-197.404	-196.416	-197.457	-196.419	-197.472	-196.404	-197.404	-196.416	-197.457	-196.419	-197.472	-78.0646	-78.4427	-78.0694	-78.4634	-78.0705	-78.4693
0.117369	44_Ethene-Pentane_2.00_dimer.out	-274.469	-275.846	-274.486	-275.92	-274.49	-275.941	-78.0645	-78.4426	-78.0694	-78.4634	-78.0705	-78.4693	-196.404	-197.404	-196.416	-197.457	-196.419	-197.472	-196.404	-197.404	-196.416	-197.457	-196.419	-197.472	-78.0646	-78.4426	-78.0694	-78.4634	-78.0705	-78.4693
0.991646	45_Ethyne-Pentane_0.90_dimer.out	-273.246	-274.597	-273.263	-274.669	-273.267	-274.69	-76.8489	-77.1915	-76.8535	-77.211	-76.8544	-77.2165	-196.404	-197.404	-196.416	-197.456	-196.419	-197.472	-196.404	-197.404	-196.416	-197.457	-196.419	-197.472	-76.849	-77.1919	-76.8535	-77.211	-76.8545	-77.2165
1.50954	45_Ethyne-Pentane_0.95_dimer.out	-273.249	-274.598	-273.266	-274.67	-273.269	-274.691	-76.8489	-77.1915	-76.8535	-77.211	-76.8544	-77.2165	-196.404	-197.404	-196.416	-197.456	-196.419	-197.472	-196.404	-197.404	-196.416	-197.457	-196.419	-197.472	-76.849	-77.1919	-76.8535	-77.2111	-76.8545	-77.2165
1.64553	45_Ethyne-Pentane_1.00_dimer.out	-273.251	-274.598	-273.267	-274.67	-273.271	-274.691	-76.8489	-77.1915	-76.8535	-77.211	-76.8544	-77.2165	-196.404	-197.404	-196.416	-197.456	-196.419	-197.472	-196.404	-197.404	-196.416	-197.457	-196.419	-197.472	-76.849	-77.1918	-76.8535	-77.211	-76.8545	-77.2165
1.5887	45_Ethyne-Pentane_1.05_dimer.out	-273.252	-274.598	-273.268	-274.67	-273.272	-274.691	-76.8489	-77.1915	-76.8535	-77.211	-76.8544	-77.2165	-196.404	-197.404	-196.416	-197.456	-196.419	-197.472	-196.404	-197.404	-196.416	-197.457	-196.419	-197.472	-76.8489	-77.1917	-76.8535	-77.211	-76.8545	-77.2165
1.44438	45_Ethyne-Pentane_1.10_dimer.out	-273.252	-274.597	-273.269	-274.67	-273.273	-274.691	-76.8489	-77.1915	-76.8535	-77.211	-76.8544	-77.2165	-196.404	-197.404	-196.416	-197.456	-196.419	-197.472	-196.404	-197.404	-196.416	-197.457	-196.419	-197.472	-76.8489	-77.1917	-76.8535	-77.211	-76.8545	-77.2165
0.932426	45_Ethyne-Pentane_1.25_dimer.out	-273.253	-274.597	-273.269	-274.669	-273.273	-274.69	-76.8489	-77.1915	-76.8535	-77.211	-76.8544	-77.2165	-196.404	-197.404	-196.416	-197.456	-196.419	-197.472	-196.404	-197.404	-196.416	-197.457	-196.419	-197.472	-76.8489	-77.1916	-76.8535	-77.211	-76.8545	-77.2165
0.400234	45_Ethyne-Pentane_1.50_dimer.out	-273.253	-274.596	-273.27	-274.668	-273.273	-274.689	-76.8489	-77.1915	-76.8535	-77.211	-76.8544	-77.2165	-196.404	-197.404	-196.416	-197.456	-196.419	-197.472	-196.404	-197.404	-196.416	-197.457	-196.419	-197.472	-76.8489	-77.1916	-76.8535	-77.211	-76.8544	-77.2165
0.0916728	45_Ethyne-Pentane_2.00_dimer.out	-273.253	-274.595	-273.27	-274.668	-273.273	-274.688	-76.8489	-77.1915	-76.8535	-77.211	-76.8544	-77.2165	-196.404	-197.404	-196.416	-197.456	-196.419	-197.472	-196.404	-197.404	-196.416	-197.456	-196.419	-197.472	-76.8489	-77.1916	-76.8535	-77.211	-76.8544	-77.2165
3.65478	46_Peptide-Pentane_0.90_dimer.out	-443.497	-445.55	-443.525	-445.669	-443.531	-445.704	-247.102	-248.14	-247.118	-248.206	-247.122	-248.226	-196.404	-197.404	-196.416	-197.457	-196.419	-197.472	-196.404	-197.404	-196.416	-197.457	-196.419	-197.472	-247.103	-248.141	-247.118	-248.206	-247.122	-248.226
4.115	46_Peptide-Pentane_0.95_dimer.out	-443.501	-445.551	-443.528	-445.669	-443.535	-445.704	-247.102	-248.14	-247.118	-248.206	-247.122	-248.226	-196.404	-197.404	-196.416	-197.457	-196.419	-197.472	-196.404	-197.404	-196.416	-197.457	-196.419	-197.472	-247.103	-248.141	-247.118	-248.206	-247.122	-248.226
4.16179	46_Peptide-Pentane_1.00_dimer.out	-443.503	-445.551	-443.531	-445.669	-443.537	-445.704	-247.102	-248.14	-247.118	-248.206	-247.122	-248.226	-196.404	-197.404	-196.416	-197.457	-196.419	-197.472	-196.404	-197.404	-196.416	-197.457	-196.419	-197.472	-247.103	-248.141	-247.118	-248.206	-247.122	-248.226
3.97387	46_Peptide-Pentane_1.05_dimer.out	-443.504	-445.55	-443.532	-445.669	-443.538	-445.704	-247.102	-248.14	-247.118	-248.206	-247.122	-248.226	-196.404	-197.404	-196.416	-197.457	-196.419	-197.472	-196.404	-197.404	-196.416	-197.457	-196.419	-197.472	-247.103	-248.141	-247.118	-248.206	-247.122	-248.226
3.66489	46_Peptide-Pentane_1.10_dimer.out	-443.505	-445.55	-443.533	-445.668	-443.539	-445.704	-247.102	-248.14	-247.118	-248.206	-247.122	-248.226	-196.404	-197.404	-196.416	-197.457	-196.419	-197.472	-196.404	-197.404	-196.416	-197.457	-196.419	-197.472	-247.103	-248.141	-247.118	-248.206	-247.122	-248.226
2.58551	46_Peptide-Pentane_1.25_dimer.out	-443.506	-445.548	-443.534	-445.667	-443.541	-445.702	-247.102	-248.14	-247.118	-248.206	-247.122	-248.226	-196.404	-197.404	-196.416	-197.457	-196.419	-197.472	-196.404	-197.404	-196.416	-197.457	-196.419	-197.472	-247.102	-248.141	-247.118	-248.206	-247.122	-248.226
1.17157	46_Peptide-Pentane_1.50_dimer.out	-443.507	-445.546	-443.534	-445.664	-443.541	-445.7	-247.102	-248.14	-247.118	-248.206	-247.122	-248.226	-196.404	-197.404	-196.416	-197.457	-196.419	-197.472	-196.404	-197.404	-196.416	-197.457	-196.419	-197.472	-247.102	-248.14	-247.118	-248.206	-247.122	-248.226
0.282057	46_Peptide-Pentane_2.00_dimer.out	-443.506	-445.544	-443.534	-445.663	-443.541	-445.698	-247.102	-248.14	-247.118	-248.206	-247.122	-248.226	-196.404	-197.404	-196.416	-197.457	-196.419	-197.472	-196.404	-197.404	-196.416	-197.457	-196.419	-197.472	-247.102	-248.14	-247.118	-248.206	-247.122	-248.226
1.49324	47_Benzene-Benzene_TS_0.90_dimer.out	-461.553	-463.64	-461.58	-463.756			-230.781	-231.818	-230.794	-231.877	-230.797	-231.894	-230.781	-231.818	-230.794	-231.877	-230.797	-231.894	-230.781	-231.819	-230.794	-231.877	-230.797	-231.894	-230.781	-231.819	-230.794	-231.877	-230.797	-231.894
2.45197	47_Benzene-Benzene_TS_0.95_dimer.out	-461.557	-463.641	-461.584	-463.758			-230.781	-231.818	-230.794	-231.877	-230.797	-231.894	-230.781	-231.818	-230.794	-231.877	-230.797	-231.894	-230.781	-231.819	-230.794	-231.877	-230.797	-231.894	-230.781	-231.819	-230.794	-231.877	-230.797	-231.894
2.76169	47_Benzene-Benzene_TS_1.00_dimer.out	-461.56	-463.641	-461.586	-463.758			-230.781	-231.818	-230.794	-231.877	-230.797	-231.894	-230.781	-231.818	-230.794	-231.877	-230.797	-231.894	-230.781	-231.818	-230.794	-231.877	-230.797	-231.894	-230.781	-231.819	-230.794	-231.877	-230.797	-231.894
2.73088	47_Benzene-Benzene_TS_1.05_dimer.out	-461.561	-463.641	-461.587	-463.758			-230.781	-231.818	-230.794	-231.877	-230.797	-231.894	-230.781	-231.818	-230.794	-231.877	-230.797	-231.894	-230.781	-231.818	-230.794	-231.877	-230.797	-231.894	-230.781	-231.819	-230.794	-231.877	-230.797	-231.894
2.53572	47_Benzene-Benzene_TS_1.10_dimer.out	-461.562	-463.641	-461.588	-463.758			-230.781	-231.818	-230.794	-231.877	-230.797	-231.894	-230.781	-231.818	-230.794	-231.877	-230.797	-231.894	-230.781	-231.818	-230.794	-231.877	-230.797	-231.894	-230.781	-231.819	-230.794	-231.877	-230.797	-231.894
1.73413	47_Benzene-Benzene_TS_1.25_dimer.out	-461.563	-463.639	-461.589	-463.757			-230.781	-231.818	-230.794	-231.877	-230.797	-231.894	-230.781	-231.818	-230.794	-231.877	-230.797	-231.894	-230.781	-231.818	-230.794	-231.877	-230.797	-231.894	-230.781	-231.818	-230.794	-231.877	-230.797	-231.894
0.817747	47_Benzene-Benzene_TS_1.50_dimer.out	-461.563	-463.638	-461.589	-463.755			-230.781	-231.818	-230.794	-231.877	-230.797	-231.894	-230.781	-231.818	-230.794	-231.877	-230.797	-231.894	-230.781	-231.818	-230.794	-231.877	-230.797	-231.894	-230.781	-231.818	-230.794	-231.877	-230.797	-231.894
0.222016	47_Benzene-Benzene_TS_2.00_dimer.out	-461.562	-463.637	-461.589	-463.754			-230.781	-231.818	-230.794	-231.877	-230.797	-231.894	-230.781	-231.818	-230.794	-231.877	-230.797	-231.894	-230.781	-231.818	-230.794	-231.877	-230.797	-231.894	-230.781	-231.818	-230.794	-231.877	-230.797	-231.894
2.40152	48_Pyridine-Pyridine_TS_0.90_dimer.out	-493.55	-495.698	-493.578	-495.822			-246.778	-247.847	-246.793	-247.909	-246.796	-247.927	-246.778	-247.847	-246.793	-247.909	-246.796	-247.927	-246.778	-247.847	-246.793	-247.909	-246.796	-247.927	-246.779	-247.848	-246.793	-247.909	-246.796	-247.927
3.19871	48_Pyridine-Pyridine_TS_0.95_dimer.out	-493.553	-495.699	-493.582	-495.823			-246.778	-247.847	-246.793	-247.909	-246.796	-247.927	-246.778	-247.847	-246.793	-247.909	-246.796	-247.927	-246.778	-247.847	-246.793	-247.909	-246.796	-247.927	-246.779	-247.848	-246.793	-247.909	-246.796	-247.927
3.43979	48_Pyridine-Pyridine_TS_1.00_dimer.out	-493.555	-495.7	-493.584	-495.823			-246.778	-247.847	-246.793	-247.909	-246.796	-247.927	-246.778	-247.847	-246.793	-247.909	-246.796	-247.927	-246.778	-247.847	-246.793	-247.909	-246.796	-247.927	-246.779	-247.847	-246.793	-247.909	-246.796	-247.927
3.37507	48_Pyridine-Pyridine_TS_1.05_dimer.out	-493.557	-495.699	-493.585	-495.823			-246.778	-247.847	-246.793	-247.909	-246.796	-247.927	-246.778	-247.847	-246.793	-247.909	-246.796	-247.927	-246.778	-247.847	-246.793	-247.909	-246.796	-247.927	-246.779	-247.847	-246.793	-247.909	-246.796	-247.927
3.15369	48_Pyridine-Pyridine_TS_1.10_dimer.out	-493.557	-495.699	-493.586	-495.823			-246.778	-247.847	-246.793	-247.909	-246.796	-247.927	-246.778	-247.847	-246.793	-247.909	-246.796	-247.927	-246.778	-247.847	-246.793	-247.909	-246.796	-247.927	-246.779	-247.847	-246.793	-247.909	-246.796	-247.927
2.25925	48_Pyridine-Pyridine_TS_1.25_dimer.out	-493.558	-495.697	-493.587	-495.822	-493.593	-495.858	-246.778	-247.847	-246.793	-247.909	-246.796	-247.927	-246.778	-247.847	-246.793	-247.909	-246.796	-247.927	-246.778	-247.847	-246.793	-247.909	-246.796	-247.927	-246.778	-247.847	-246.793	-247.909	-246.796	-247.927
1.16835	48_Pyridine-Pyridine_TS_1.50_dimer.out	-493.558	-495.696	-493.586	-495.82	-493.592	-495.856	-246.778	-247.847	-246.793	-247.909	-246.796	-247.927	-246.778	-247.847	-246.793	-247.909	-246.796	-247.927	-246.778	-247.847	-246.793	-247.909	-246.796	-247.927	-246.778	-247.847	-246.793	-247.909	-246.796	-247.927
0.370157	48_Pyridine-Pyridine_TS_2.00_dimer.out	-493.557	-495.694	-493.586	-495.819	-493.592	-495.855	-246.778	-247.847	-246.793	-247.909	-246.796	-247.927	-246.778	-247.847	-246.793	-247.909	-246.796	-247.927	-246.778	-247.847	-246.793	-247.909	-246.796	-247.927	-246.778	-247.847	-246.793	-247.909	-246.796	-247.927
1.94501	49_Benzene-Pyridine_TS_0.90_dimer.out	-477.551	-479.669	-477.579	-479.789			-230.781	-231.818	-230.794	-231.877	-230.797	-231.894	-246.778	-247.847	-246.793	-247.909	-246.796	-247.927	-246.778	-247.847	-246.793	-247.909	-246.796	-247.927	-230.781	-231.819	-230.794	-231.877	-230.797	-231.894
2.92164	49_Benzene-Pyridine_TS_0.95_dimer.out	-477.555	-479.67	-477.583	-479.791			-230.781	-231.818	-230.794	-231.877	-230.797	-231.894	-246.778	-247.847	-246.793	-247.909	-246.796	-247.927	-246.778	-247.847	-246.793	-247.909	-246.796	-247.927	-230.781	-231.819	-230.794	-231.877	-230.797	-231.894
3.2258	49_Benzene-Pyridine_TS_1.00_dimer.out	-477.558	-479.671	-477.585	-479.791			-230.781	-231.818	-230.794	-231.877	-230.797	-231.894	-246.778	-247.847	-246.793	-247.909	-246.796	-247.927	-246.778	-247.847	-246.793	-247.909	-246.796	-247.927	-230.781	-231.819	-230.794	-231.877	-230.797	-231.894
3.17573	49_Benzene-Pyridine_TS_1.05_dimer.out	-477.559	-479.67	-477.587	-479.791			-230.781	-231.818	-230.794	-231.877	-230.797	-231.894	-246.778	-247.847	-246.793	-247.909	-246.796	-247.927	-246.778	-247.847	-246.793	-247.909	-246.796	-247.927	-230.781	-231.819	-230.794	-231.877	-230.797	-231.894
2.95491	49_Benzene-Pyridine_TS_1.10_dimer.out	-477.56	-479.67	-477.587	-479.791			-230.781	-231.818	-230.794	-231.877	-230.797	-231.894	-246.778	-247.847	-246.793	-247.909	-246.796	-247.927	-246.778	-247.847	-246.793	-247.909	-246.796	-247.927	-230.781	-231.819	-230.794	-231.877	-230.797	-231.894
2.06781	49_Benzene-Pyridine_TS_1.25_dimer.out	-477.561	-479.668	-477.588	-479.789			-230.781	-231.818	-230.794	-231.877	-230.797	-231.894	-246.778	-247.847	-246.793	-247.909	-246.796	-247.927	-246.778	-247.847	-246.793	-247.909	-246.796	-247.927	-230.781	-231.818	-230.794	-231.877	-230.797	-231.894
1.04165	49_Benzene-Pyridine_TS_1.50_dimer.out	-477.56	-479.667	-477.588	-479.787			-230.781	-231.818	-230.794	-231.877	-230.797	-231.894	-246.778	-247.847	-246.793	-247.909	-246.796	-247.927	-246.778	-247.847	-246.793	-247.909	-246.796	-247.927	-230.781	-231.818	-230.794	-231.877	-230.797	-231.894
0.331789	49_Benzene-Pyridine_TS_2.00_dimer.out	-477.56	-479.665	-477.587	-479.786			-230.781	-231.818	-230.794	-231.877	-230.797	-231.894	-246.778	-247.847	-246.793	-247.909	-246.796	-247.927	-246.778	-247.847	-246.793	-247.909	-246.796	-247.927	-230.781	-231.818	-230.794	-231.877	-230.797	-231.894
1.79084	50_Benzene-Ethyne_CH-pi_0.90_dimer.out	-307.626	-309.013	-307.643	-309.091	-307.647	-309.113	-230.781	-231.818	-230.794	-231.877	-230.797	-231.894	-76.8488	-77.1915	-76.8534	-77.2109	-76.8544	-77.2165	-76.8489	-77.1919	-76.8534	-77.2111	-76.8544	-77.2165	-230.781	-231.819	-230.794	-231.877	-230.797	-231.894
2.58043	50_Benzene-Ethyne_CH-pi_0.95_dimer.out	-307.629	-309.014	-307.646	-309.092	-307.65	-309.114	-230.781	-231.818	-230.794	-231.877	-230.797	-231.894	-76.8488	-77.1915	-76.8534	-77.2109	-76.8544	-77.2165	-76.8489	-77.1919	-76.8534	-77.211	-76.8544	-77.2165	-230.781	-231.819	-230.794	-231.877	-230.797	-231.894
2.80969	50_Benzene-Ethyne_CH-pi_1.00_dimer.out	-307.63	-309.015	-307.648	-309.092	-307.652	-309.115	-230.781	-231.818	-230.794	-231.877	-230.797	-231.894	-76.8488	-77.1915	-76.8534	-77.2109	-76.8544	-77.2165	-76.8489	-77.1918	-76.8534	-77.211	-76.8544	-77.2165	-230.781	-231.819	-230.794	-231.877	-230.797	-231.894
2.74707	50_Benzene-Ethyne_CH-pi_1.05_dimer.out	-307.631	-309.014	-307.649	-309.092	-307.653	-309.115	-230.781	-231.818	-230.794	-231.877	-230.797	-231.894	-76.8488	-77.1915	-76.8534	-77.2109	-76.8544	-77.2165	-76.8489	-77.1917	-76.8534	-77.211	-76.8544	-77.2165	-230.781	-231.819	-230.794	-231.877	-230.797	-231.894
2.54513	50_Benzene-Ethyne_CH-pi_1.10_dimer.out	-307.631	-309.014	-307.649	-309.092	-307.653	-309.114	-230.781	-231.818	-230.794	-231.877	-230.797	-231.894	-76.8488	-77.1915	-76.8534	-77.2109	-76.8544	-77.2165	-76.8489	-77.1917	-76.8534	-77.211	-76.8544	-77.2165	-230.781	-231.818	-230.794	-231.877	-230.797	-231.894
1.7721	50_Benzene-Ethyne_CH-pi_1.25_dimer.out	-307.632	-309.013	-307.649	-309.091	-307.653	-309.113	-230.781	-231.818	-230.794	-231.877	-230.797	-231.894	-76.8488	-77.1915	-76.8534	-77.2109	-76.8544	-77.2165	-76.8488	-77.1916	-76.8534	-77.211	-76.8544	-77.2165	-230.781	-231.818	-230.794	-231.877	-230.797	-231.894
0.88985	50_Benzene-Ethyne_CH-pi_1.50_dimer.out	-307.631	-309.011	-307.649	-309.089	-307.653	-309.112	-230.781	-231.818	-230.794	-231.877	-230.797	-231.894	-76.8488	-77.1915	-76.8534	-77.2109	-76.8544	-77.2165	-76.8488	-77.1916	-76.8534	-77.2109	-76.8544	-77.2165	-230.781	-231.818	-230.794	-231.877	-230.797	-231.894
0.27212	50_Benzene-Ethyne_CH-pi_2.00_dimer.out	-307.63	-309.01	-307.648	-309.088	-307.652	-309.111	-230.781	-231.818	-230.794	-231.877	-230.797	-231.894	-76.8488	-77.1915	-76.8534	-77.2109	-76.8544	-77.2165	-76.8488	-77.1916	-76.8534	-77.2109	-76.8544	-77.2165	-230.781	-231.818	-230.794	-231.877	-230.797	-231.894
1.16975	51_Ethyne-Ethyne_TS_0.90_dimer.out	-153.697	-154.385	-153.706	-154.424	-153.708	-154.435	-76.8489	-77.1915	-76.8535	-77.211	-76.8545	-77.2165	-76.8488	-77.1916	-76.8534	-77.211	-76.8544	-77.2165	-76.8489	-77.1917	-76.8535	-77.211	-76.8544	-77.2165	-76.849	-77.1918	-76.8535	-77.211	-76.8545	-77.2165
1.43404	51_Ethyne-Ethyne_TS_0.95_dimer.out	-153.698	-154.386	-153.707	-154.424	-153.709	-154.435	-76.8489	-77.1915	-76.8535	-77.211	-76.8545	-77.2165	-76.8488	-77.1916	-76.8534	-77.211	-76.8544	-77.2165	-76.8489	-77.1917	-76.8534	-77.211	-76.8544	-77.2165	-76.849	-77.1918	-76.8535	-77.211	-76.8545	-77.2165
1.48941	51_Ethyne-Ethyne_TS_1.00_dimer.out	-153.699	-154.386	-153.708	-154.424	-153.71	-154.435	-76.8489	-77.1915	-76.8535	-77.211	-76.8545	-77.2165	-76.8488	-77.1916	-76.8534	-77.211	-76.8544	-77.2165	-76.8489	-77.1916	-76.8534	-77.211	-76.8544	-77.2165	-76.8489	-77.1917	-76.8535	-77.211	-76.8545	-77.2165
1.43134	51_Ethyne-Ethyne_TS_1.05_dimer.out	-153.699	-154.385	-153.708	-154.424	-153.71	-154.435	-76.8489	-77.1915	-76.8535	-77.211	-76.8545	-77.2165	-76.8488	-77.1916	-76.8534	-77.211	-76.8544	-77.2165	-76.8489	-77.1916	-76.8534	-77.211	-76.8544	-77.2165	-76.8489	-77.1917	-76.8535	-77.211	-76.8545	-77.2165
1.31762	51_Ethyne-Ethyne_TS_1.10_dimer.out	-153.699	-154.385	-153.708	-154.424	-153.71	-154.435	-76.8489	-77.1915	-76.8535	-77.211	-76.8545	-77.2165	-76.8488	-77.1916	-76.8534	-77.211	-76.8544	-77.2165	-76.8489	-77.1916	-76.8534	-77.211	-76.8544	-77.2165	-76.8489	-77.1917	-76.8535	-77.211	-76.8545	-77.2165
0.913488	51_Ethyne-Ethyne_TS_1.25_dimer.out	-153.699	-154.385	-153.708	-154.423	-153.71	-154.434	-76.8489	-77.1915	-76.8535	-77.211	-76.8545	-77.2165	-76.8488	-77.1916	-76.8534	-77.211	-76.8544	-77.2165	-76.8489	-77.1916	-76.8534	-77.211	-76.8544	-77.2165	-76.8489	-77.1916	-76.8535	-77.211	-76.8545	-77.2165
0.4518	51_Ethyne-Ethyne_TS_1.50_dimer.out	-153.698	-154.384	-153.708	-154.423	-153.71	-154.434	-76.8489	-77.1915	-76.8535	-77.211	-76.8545	-77.2165	-76.8488	-77.1916	-76.8534	-77.211	-76.8544	-77.2165	-76.8489	-77.1916	-76.8534	-77.211	-76.8544	-77.2165	-76.8489	-77.1916	-76.8535	-77.211	-76.8545	-77.2165
0.133953	51_Ethyne-Ethyne_TS_2.00_dimer.out	-153.698	-154.383	-153.707	-154.422	-153.709	-154.433	-76.8489	-77.1915	-76.8535	-77.211	-76.8545	-77.2165	-76.8488	-77.1916	-76.8534	-77.211	-76.8544	-77.2165	-76.8488	-77.1916	-76.8534	-77.211	-76.8544	-77.2165	-76.8489	-77.1916	-76.8535	-77.211	-76.8545	-77.2165
3.90822	52_Benzene-AcOH_OH-pi_0.90_dimer.out	-458.683	-460.595	-458.711	-460.714	-458.717	-460.75	-230.781	-231.818	-230.794	-231.877	-230.797	-231.894	-227.905	-228.77	-227.92	-228.831	-227.923	-228.85	-227.905	-228.771	-227.92	-228.831	-227.923	-228.85	-230.781	-231.819	-230.794	-231.877	-230.797	-231.894
4.52526	52_Benzene-AcOH_OH-pi_0.95_dimer.out	-458.686	-460.596	-458.714	-460.715	-458.72	-460.751	-230.781	-231.818	-230.794	-231.877	-230.797	-231.894	-227.905	-228.77	-227.92	-228.831	-227.923	-228.85	-227.905	-228.771	-227.92	-228.831	-227.923	-228.85	-230.781	-231.819	-230.794	-231.877	-230.797	-231.894
4.65525	52_Benzene-AcOH_OH-pi_1.00_dimer.out	-458.687	-460.596	-458.715	-460.715	-458.722	-460.751	-230.781	-231.818	-230.794	-231.877	-230.797	-231.894	-227.905	-228.77	-227.92	-228.831	-227.923	-228.85	-227.905	-228.771	-227.92	-228.831	-227.923	-228.85	-230.781	-231.819	-230.794	-231.877	-230.797	-231.894
4.50756	52_Benzene-AcOH_OH-pi_1.05_dimer.out	-458.688	-460.596	-458.716	-460.715	-458.723	-460.751	-230.781	-231.818	-230.794	-231.877	-230.797	-231.894	-227.905	-228.77	-227.92	-228.831	-227.923	-228.85	-227.905	-228.77	-227.92	-228.831	-227.923	-228.85	-230.781	-231.819	-230.794	-231.877	-230.797	-231.894
4.21346	52_Benzene-AcOH_OH-pi_1.10_dimer.out	-458.689	-460.595	-458.717	-460.715	-458.723	-460.75	-230.781	-231.818	-230.794	-231.877	-230.797	-231.894	-227.905	-228.77	-227.92	-228.831	-227.923	-228.85	-227.905	-228.77	-227.92	-228.831	-227.923	-228.85	-230.781	-231.819	-230.794	-231.877	-230.797	-231.894
3.10667	52_Benzene-AcOH_OH-pi_1.25_dimer.out	-458.689	-460.593	-458.717	-460.713	-458.723	-460.749	-230.781	-231.818	-230.794	-231.877	-230.797	-231.894	-227.905	-228.77	-227.92	-228.831	-227.923	-228.85	-227.905	-228.77	-227.92	-228.831	-227.923	-228.85	-230.781	-231.818	-230.794	-231.877	-230.797	-231.894
1.69725	52_Benzene-AcOH_OH-pi_1.50_dimer.out	-458.688	-460.591	-458.716	-460.711	-458.722	-460.746	-230.781	-231.818	-230.794	-231.877	-230.797	-231.894	-227.905	-228.77	-227.92	-228.831	-227.923	-228.85	-227.905	-228.77	-227.92	-228.831	-227.923	-228.85	-230.781	-231.818	-230.794	-231.877	-230.797	-231.894
0.553786	52_Benzene-AcOH_OH-pi_2.00_dimer.out	-458.687	-460.589	-458.715	-460.709	-458.721	-460.745	-230.781	-231.818	-230.794	-231.877	-230.797	-231.894	-227.905	-228.77	-227.92	-228.831	-227.923	-228.85	-227.905	-228.77	-227.92	-228.831	-227.923	-228.85	-230.781	-231.818	-230.794	-231.877	-230.797	-231.894
3.7675	53_Benzene-AcNH2_NH-pi_0.90_dimer.out	-438.842	-440.731	-438.868	-440.845	-438.874	-440.879	-230.781	-231.818	-230.794	-231.877	-230.797	-231.894	-208.063	-208.907	-208.076	-208.962	-208.079	-208.979	-208.063	-208.907	-208.076	-208.962	-208.079	-208.979	-230.781	-231.819	-230.794	-231.877	-230.797	-231.894
4.24208	53_Benzene-AcNH2_NH-pi_0.95_dimer.out	-438.844	-440.732	-438.871	-440.846	-438.876	-440.88	-230.781	-231.818	-230.794	-231.877	-230.797	-231.894	-208.063	-208.907	-208.076	-208.962	-208.079	-208.979	-208.063	-208.907	-208.076	-208.962	-208.079	-208.979	-230.781	-231.819	-230.794	-231.877	-230.797	-231.894
4.33419	53_Benzene-AcNH2_NH-pi_1.00_dimer.out	-438.845	-440.732	-438.872	-440.846	-438.878	-440.88	-230.781	-231.818	-230.794	-231.877	-230.797	-231.894	-208.063	-208.907	-208.076	-208.962	-208.079	-208.979	-208.063	-208.907	-208.076	-208.962	-208.079	-208.979	-230.781	-231.819	-230.794	-231.877	-230.797	-231.894
4.20138	53_Benzene-AcNH2_NH-pi_1.05_dimer.out	-438.846	-440.732	-438.873	-440.846	-438.879	-440.88	-230.781	-231.818	-230.794	-231.877	-230.797	-231.894	-208.063	-208.907	-208.076	-208.962	-208.079	-208.979	-208.063	-208.907	-208.076	-208.962	-208.079	-208.979	-230.781	-231.818	-230.794	-231.877	-230.797	-231.894
3.94465	53_Benzene-AcNH2_NH-pi_1.10_dimer.out	-438.846	-440.731	-438.873	-440.845	-438.879	-440.879	-230.781	-231.818	-230.794	-231.877	-230.797	-231.894	-208.063	-208.907	-208.076	-208.962	-208.079	-208.979	-208.063	-208.907	-208.076	-208.962	-208.079	-208.979	-230.781	-231.818	-230.794	-231.877	-230.797	-231.894
2.95996	53_Benzene-AcNH2_NH-pi_1.25_dimer.out	-438.846	-440.73	-438.873	-440.844	-438.879	-440.878	-230.781	-231.818	-230.794	-231.877	-230.797	-231.894	-208.063	-208.907	-208.076	-208.962	-208.079	-208.979	-208.063	-208.907	-208.076	-208.962	-208.079	-208.979	-230.781	-231.818	-230.794	-231.877	-230.797	-231.894
1.64141	53_Benzene-AcNH2_NH-pi_1.50_dimer.out	-438.845	-440.727	-438.872	-440.842	-438.878	-440.876	-230.781	-231.818	-230.794	-231.877	-230.797	-231.894	-208.063	-208.907	-208.076	-208.962	-208.079	-208.979	-208.063	-208.907	-208.076	-208.962	-208.079	-208.979	-230.781	-231.818	-230.794	-231.877	-230.797	-231.894
0.480903	53_Benzene-AcNH2_NH-pi_2.00_dimer.out	-438.844	-440.725	-438.871	-440.84	-438.877	-440.874	-230.781	-231.818	-230.794	-231.877	-230.797	-231.894	-208.063	-208.907	-208.076	-208.962	-208.079	-208.979	-208.063	-208.907	-208.076	-208.962	-208.079	-208.979	-230.781	-231.818	-230.794	-231.877	-230.797	-231.894
2.74512	54_Benzene-Water_OH-pi_0.90_dimer.out	-306.84	-308.164	-306.858	-308.245	-306.863	-308.268	-230.781	-231.818	-230.794	-231.877	-230.797	-231.894	-76.0601	-76.3415	-76.0655	-76.3633	-76.0669	-76.3702	-76.0602	-76.342	-76.0656	-76.3635	-76.0669	-76.3703	-230.781	-231.819	-230.794	-231.877	-230.797	-231.894
3.16118	54_Benzene-Water_OH-pi_0.95_dimer.out	-306.842	-308.165	-306.86	-308.245	-306.864	-308.269	-230.781	-231.818	-230.794	-231.877	-230.797	-231.894	-76.0601	-76.3415	-76.0655	-76.3633	-76.0669	-76.3702	-76.0602	-76.3419	-76.0656	-76.3635	-76.0669	-76.3703	-230.781	-231.819	-230.794	-231.877	-230.797	-231.894
3.22366	54_Benzene-Water_OH-pi_1.00_dimer.out	-306.843	-308.165	-306.861	-308.245	-306.866	-308.269	-230.781	-231.818	-230.794	-231.877	-230.797	-231.894	-76.0601	-76.3415	-76.0655	-76.3633	-76.0669	-76.3702	-76.0602	-76.3418	-76.0656	-76.3635	-76.0669	-76.3703	-230.781	-231.818	-230.794	-231.877	-230.797	-231.894
3.09425	54_Benzene-Water_OH-pi_1.05_dimer.out	-306.843	-308.165	-306.862	-308.245	-306.866	-308.269	-230.781	-231.818	-230.794	-231.877	-230.797	-231.894	-76.0601	-76.3415	-76.0655	-76.3633	-76.0669	-76.3702	-76.0602	-76.3418	-76.0656	-76.3634	-76.0669	-76.3702	-230.781	-231.818	-230.794	-231.877	-230.797	-231.894
2.87037	54_Benzene-Water_OH-pi_1.10_dimer.out	-306.844	-308.164	-306.862	-308.245	-306.866	-308.269	-230.781	-231.818	-230.794	-231.877	-230.797	-231.894	-76.0601	-76.3415	-76.0655	-76.3633	-76.0669	-76.3702	-76.0602	-76.3417	-76.0656	-76.3634	-76.0669	-76.3702	-230.781	-231.818	-230.794	-231.877	-230.797	-231.894
2.08886	54_Benzene-Water_OH-pi_1.25_dimer.out	-306.843	-308.163	-306.862	-308.244	-306.866	-308.267	-230.781	-231.818	-230.794	-231.877	-230.797	-231.894	-76.0601	-76.3415	-76.0655	-76.3633	-76.0669	-76.3702	-76.0601	-76.3416	-76.0656	-76.3634	-76.0669	-76.3702	-230.781	-231.818	-230.794	-231.877	-230.797	-231.894
1.15401	54_Benzene-Water_OH-pi_1.50_dimer.out	-306.843	-308.161	-306.861	-308.242	-306.866	-308.266	-230.781	-231.818	-230.794	-231.877	-230.797	-231.894	-76.0601	-76.3415	-76.0655	-76.3633	-76.0669	-76.3702	-76.0601	-76.3415	-76.0655	-76.3634	-76.0669	-76.3702	-230.781	-231.818	-230.794	-231.877	-230.797	-231.894
0.417078	54_Benzene-Water_OH-pi_2.00_dimer.out	-306.842	-308.16	-306.861	-308.241	-306.865	-308.265	-230.781	-231.818	-230.794	-231.877	-230.797	-231.894	-76.0601	-76.3415	-76.0655	-76.3633	-76.0669	-76.3702	-76.0601	-76.3415	-76.0655	-76.3633	-76.0669	-76.3702	-230.781	-231.818	-230.794	-231.877	-230.797	-231.894
3.338	55_Benzene-MeOH_OH-pi_0.90_dimer.out	-345.868	-347.385	-345.889	-347.475	-345.894	-347.502	-230.781	-231.818	-230.794	-231.877	-230.797	-231.894	-115.092	-115.561	-115.099	-115.593	-115.101	-115.603	-115.092	-115.562	-115.1	-115.593	-115.101	-115.603	-230.781	-231.819	-230.794	-231.877	-230.797	-231.894
3.9499	55_Benzene-MeOH_OH-pi_0.95_dimer.out	-345.871	-347.386	-345.892	-347.476	-345.897	-347.503	-230.781	-231.818	-230.794	-231.877	-230.797	-231.894	-115.092	-115.561	-115.099	-115.593	-115.101	-115.603	-115.092	-115.561	-115.1	-115.593	-115.101	-115.603	-230.781	-231.819	-230.794	-231.877	-230.797	-231.894
4.10581	55_Benzene-MeOH_OH-pi_1.00_dimer.out	-345.873	-347.386	-345.894	-347.476	-345.898	-347.503	-230.781	-231.818	-230.794	-231.877	-230.797	-231.894	-115.092	-115.561	-115.099	-115.593	-115.101	-115.603	-115.092	-115.561	-115.1	-115.593	-115.101	-115.603	-230.781	-231.819	-230.794	-231.877	-230.797	-231.894
3.9982	55_Benzene-MeOH_OH-pi_1.05_dimer.out	-345.874	-347.386	-345.895	-347.476	-345.9	-347.503	-230.781	-231.818	-230.794	-231.877	-230.797	-231.894	-115.092	-115.561	-115.099	-115.593	-115.101	-115.603	-115.092	-115.561	-115.1	-115.593	-115.101	-115.603	-230.781	-231.819	-230.794	-231.877	-230.797	-231.894
3.74932	55_Benzene-MeOH_OH-pi_1.10_dimer.out	-345.875	-347.385	-345.895	-347.476	-345.9	-347.502	-230.781	-231.818	-230.794	-231.877	-230.797	-231.894	-115.092	-115.561	-115.099	-115.593	-115.101	-115.603	-115.092	-115.561	-115.1	-115.593	-115.101	-115.603	-230.781	-231.819	-230.794	-231.877	-230.797	-231.894
2.77441	55_Benzene-MeOH_OH-pi_1.25_dimer.out	-345.875	-347.384	-345.896	-347.474	-345.901	-347.501	-230.781	-231.818	-230.794	-231.877	-230.797	-231.894	-115.092	-115.561	-115.099	-115.593	-115.101	-115.603	-115.092	-115.561	-115.099	-115.593	-115.101	-115.603	-230.781	-231.818	-230.794	-231.877	-230.797	-231.894
1.52391	55_Benzene-MeOH_OH-pi_1.50_dimer.out	-345.874	-347.382	-345.895	-347.472	-345.9	-347.499	-230.781	-231.818	-230.794	-231.877	-230.797	-231.894	-115.092	-115.561	-115.099	-115.593	-115.101	-115.603	-115.092	-115.561	-115.099	-115.593	-115.101	-115.603	-230.781	-231.818	-230.794	-231.877	-230.797	-231.894
0.518123	55_Benzene-MeOH_OH-pi_2.00_dimer.out	-345.874	-347.38	-345.894	-347.471	-345.899	-347.497	-230.781	-231.818	-230.794	-231.877	-230.797	-231.894	-115.092	-115.561	-115.099	-115.593	-115.101	-115.603	-115.092	-115.561	-115.099	-115.593	-115.101	-115.603	-230.781	-231.818	-230.794	-231.877	-230.797	-231.894
2.38091	56_Benzene-MeNH2_NH-pi_0.90_dimer.out	-326.03	-327.527	-326.049	-327.612	-326.053	-327.636	-230.781	-231.818	-230.794	-231.877	-230.797	-231.894	-95.2551	-95.7045	-95.2613	-95.7308	-95.2627	-95.7385	-95.2552	-95.7049	-95.2613	-95.7309	-95.2627	-95.7386	-230.781	-231.819	-230.794	-231.877	-230.797	-231.894
2.97661	56_Benzene-MeNH2_NH-pi_0.95_dimer.out	-326.033	-327.528	-326.052	-327.613	-326.056	-327.637	-230.781	-231.818	-230.794	-231.877	-230.797	-231.894	-95.2551	-95.7045	-95.2613	-95.7308	-95.2627	-95.7385	-95.2552	-95.7049	-95.2613	-95.7309	-95.2627	-95.7386	-230.781	-231.819	-230.794	-231.877	-230.797	-231.894
3.13876	56_Benzene-MeNH2_NH-pi_1.00_dimer.out	-326.035	-327.528	-326.054	-327.613	-326.058	-327.637	-230.781	-231.818	-230.794	-231.877	-230.797	-231.894	-95.2551	-95.7045	-95.2613	-95.7308	-95.2627	-95.7385	-95.2552	-95.7048	-95.2613	-95.7309	-95.2627	-95.7386	-230.781	-231.819	-230.794	-231.877	-230.797	-231.894
3.04387	56_Benzene-MeNH2_NH-pi_1.05_dimer.out	-326.036	-327.528	-326.055	-327.613	-326.06	-327.637	-230.781	-231.818	-230.794	-231.877	-230.797	-231.894	-95.2551	-95.7045	-95.2613	-95.7308	-95.2627	-95.7385	-95.2552	-95.7047	-95.2613	-95.7308	-95.2627	-95.7385	-230.781	-231.819	-230.794	-231.877	-230.797	-231.894
2.80285	56_Benzene-MeNH2_NH-pi_1.10_dimer.out	-326.037	-327.527	-326.056	-327.612	-326.06	-327.637	-230.781	-231.818	-230.794	-231.877	-230.797	-231.894	-95.2551	-95.7045	-95.2613	-95.7308	-95.2627	-95.7385	-95.2552	-95.7046	-95.2613	-95.7308	-95.2627	-95.7385	-230.781	-231.818	-230.794	-231.877	-230.797	-231.894
1.92243	56_Benzene-MeNH2_NH-pi_1.25_dimer.out	-326.037	-327.526	-326.057	-327.611	-326.061	-327.635	-230.781	-231.818	-230.794	-231.877	-230.797	-231.894	-95.2551	-95.7045	-95.2613	-95.7308	-95.2627	-95.7385	-95.2552	-95.7046	-95.2613	-95.7308	-95.2627	-95.7385	-230.781	-231.818	-230.794	-231.877	-230.797	-231.894
0.93271	56_Benzene-MeNH2_NH-pi_1.50_dimer.out	-326.037	-327.524	-326.056	-327.609	-326.061	-327.634	-230.781	-231.818	-230.794	-231.877	-230.797	-231.894	-95.2551	-95.7045	-95.2613	-95.7308	-95.2627	-95.7385	-95.2552	-95.7045	-95.2613	-95.7308	-95.2627	-95.7385	-230.781	-231.818	-230.794	-231.877	-230.797	-231.894
0.260262	56_Benzene-MeNH2_NH-pi_2.00_dimer.out	-326.036	-327.523	-326.056	-327.608	-326.06	-327.633	-230.781	-231.818	-230.794	-231.877	-230.797	-231.894	-95.2551	-95.7045	-95.2613	-95.7308	-95.2627	-95.7385	-95.2551	-95.7045	-95.2613	-95.7308	-95.2627	-95.7385	-230.781	-231.818	-230.794	-231.877	-230.797	-231.894
3.59468	57_Benzene-Peptide_NH-pi_0.90_dimer.out	-477.874	-479.965	-477.903	-480.089	-477.909	-480.126	-230.781	-231.818	-230.794	-231.877	-230.797	-231.894	-247.102	-248.14	-247.118	-248.206	-247.122	-248.226	-247.102	-248.141	-247.118	-248.206	-247.122	-248.226	-230.781	-231.819	-230.794	-231.877	-230.797	-231.894
4.82807	57_Benzene-Peptide_NH-pi_0.95_dimer.out	-477.88	-479.967	-477.908	-480.091	-477.915	-480.127	-230.781	-231.818	-230.794	-231.877	-230.797	-231.894	-247.102	-248.14	-247.118	-248.206	-247.122	-248.226	-247.102	-248.141	-247.118	-248.206	-247.122	-248.226	-230.781	-231.819	-230.794	-231.877	-230.797	-231.894
5.17609	57_Benzene-Peptide_NH-pi_1.00_dimer.out	-477.883	-479.967	-477.911	-480.091	-477.918	-480.128	-230.781	-231.818	-230.794	-231.877	-230.797	-231.894	-247.102	-248.14	-247.118	-248.206	-247.122	-248.226	-247.102	-248.141	-247.118	-248.206	-247.122	-248.226	-230.781	-231.819	-230.794	-231.877	-230.797	-231.894
5.0589	57_Benzene-Peptide_NH-pi_1.05_dimer.out	-477.884	-479.967	-477.913	-480.091	-477.919	-480.128	-230.781	-231.818	-230.794	-231.877	-230.797	-231.894	-247.102	-248.14	-247.118	-248.206	-247.122	-248.226	-247.102	-248.141	-247.118	-248.206	-247.122	-248.226	-230.781	-231.819	-230.794	-231.877	-230.797	-231.894
4.71472	57_Benzene-Peptide_NH-pi_1.10_dimer.out	-477.885	-479.966	-477.914	-480.091	-477.92	-480.127	-230.781	-231.818	-230.794	-231.877	-230.797	-231.894	-247.102	-248.14	-247.118	-248.206	-247.122	-248.226	-247.102	-248.141	-247.118	-248.206	-247.122	-248.226	-230.781	-231.819	-230.794	-231.877	-230.797	-231.894
3.38389	57_Benzene-Peptide_NH-pi_1.25_dimer.out	-477.886	-479.964	-477.915	-480.088	-477.921	-480.125	-230.781	-231.818	-230.794	-231.877	-230.797	-231.894	-247.102	-248.14	-247.118	-248.206	-247.122	-248.226	-247.102	-248.14	-247.118	-248.206	-247.122	-248.226	-230.781	-231.818	-230.794	-231.877	-230.797	-231.894
1.79943	57_Benzene-Peptide_NH-pi_1.50_dimer.out	-477.885	-479.961	-477.914	-480.086	-477.921	-480.123	-230.781	-231.818	-230.794	-231.877	-230.797	-231.894	-247.102	-248.14	-247.118	-248.206	-247.122	-248.226	-247.102	-248.14	-247.118	-248.206	-247.122	-248.226	-230.781	-231.818	-230.794	-231.877	-230.797	-231.894
0.619431	57_Benzene-Peptide_NH-pi_2.00_dimer.out	-477.884	-479.959	-477.913	-480.084	-477.92	-480.121	-230.781	-231.818	-230.794	-231.877	-230.797	-231.894	-247.102	-248.14	-247.118	-248.206	-247.122	-248.226	-247.102	-248.14	-247.118	-248.206	-247.122	-248.226	-230.781	-231.818	-230.794	-231.877	-230.797	-231.894
2.88416	58_Pyridine-Pyridine_CH-N_0.90_dimer.out	-493.553	-495.698	-493.582	-495.822			-246.778	-247.847	-246.793	-247.909	-246.796	-247.927	-246.778	-247.847	-246.793	-247.909	-246.796	-247.927	-246.778	-247.847	-246.793	-247.909	-246.796	-247.927	-246.778	-247.847	-246.793	-247.909	-246.796	-247.927
3.86933	58_Pyridine-Pyridine_CH-N_0.95_dimer.out	-493.556	-495.7	-493.585	-495.824			-246.778	-247.847	-246.793	-247.909	-246.796	-247.927	-246.778	-247.847	-246.793	-247.909	-246.796	-247.927	-246.778	-247.847	-246.793	-247.909	-246.796	-247.927	-246.778	-247.847	-246.793	-247.909	-246.796	-247.927
4.16646	58_Pyridine-Pyridine_CH-N_1.00_dimer.out	-493.559	-495.7	-493.587	-495.824			-246.778	-247.847	-246.793	-247.909	-246.796	-247.927	-246.778	-247.847	-246.793	-247.909	-246.796	-247.927	-246.778	-247.847	-246.793	-247.909	-246.796	-247.927	-246.778	-247.847	-246.793	-247.909	-246.796	-247.927
3.88977	58_Pyridine-Pyridine_CH-N_1.05_dimer.out	-493.559	-495.7	-493.588	-495.824	-493.594	-495.86	-246.778	-247.847	-246.793	-247.909	-246.796	-247.927	-246.778	-247.847	-246.793	-247.909	-246.796	-247.927	-246.778	-247.847	-246.793	-247.909	-246.796	-247.927	-246.778	-247.847	-246.793	-247.909	-246.796	-247.927
3.44199	58_Pyridine-Pyridine_CH-N_1.10_dimer.out	-493.559	-495.699	-493.588	-495.823	-493.594	-495.86	-246.778	-247.847	-246.793	-247.909	-246.796	-247.927	-246.778	-247.847	-246.793	-247.909	-246.796	-247.927	-246.778	-247.847	-246.793	-247.909	-246.796	-247.927	-246.778	-247.847	-246.793	-247.909	-246.796	-247.927
2.17336	58_Pyridine-Pyridine_CH-N_1.25_dimer.out	-493.559	-495.697	-493.587	-495.821	-493.593	-495.858	-246.778	-247.847	-246.793	-247.909	-246.796	-247.927	-246.778	-247.847	-246.793	-247.909	-246.796	-247.927	-246.778	-247.847	-246.793	-247.909	-246.796	-247.927	-246.778	-247.847	-246.793	-247.909	-246.796	-247.927
1.00513	58_Pyridine-Pyridine_CH-N_1.50_dimer.out	-493.558	-495.695	-493.586	-495.819	-493.592	-495.856	-246.778	-247.847	-246.793	-247.909	-246.796	-247.927	-246.778	-247.847	-246.793	-247.909	-246.796	-247.927	-246.778	-247.847	-246.793	-247.909	-246.796	-247.927	-246.778	-247.847	-246.793	-247.909	-246.796	-247.927
0.274043	58_Pyridine-Pyridine_CH-N_2.00_dimer.out	-493.557	-495.694	-493.586	-495.818	-493.592	-495.855	-246.778	-247.847	-246.793	-247.909	-246.796	-247.927	-246.778	-247.847	-246.793	-247.909	-246.796	-247.927	-246.778	-247.847	-246.793	-247.909	-246.796	-247.927	-246.778	-247.847	-246.793	-247.909	-246.796	-247.927
2.60366	59_Ethyne-Water_CH-O_0.90_dimer.out	-152.912	-153.537	-152.922	-153.578	-152.924	-153.591	-76.8487	-77.1915	-76.8533	-77.2109	-76.8543	-77.2165	-76.0603	-76.3415	-76.0658	-76.3634	-76.0671	-76.3703	-76.0604	-76.3418	-76.0658	-76.3635	-76.0671	-76.3703	-76.8488	-77.1917	-76.8533	-77.211	-76.8543	-77.2165
2.86494	59_Ethyne-Water_CH-O_0.95_dimer.out	-152.912	-153.538	-152.922	-153.579	-152.925	-153.591	-76.8487	-77.1915	-76.8533	-77.2109	-76.8543	-77.2165	-76.0603	-76.3415	-76.0658	-76.3634	-76.0671	-76.3703	-76.0604	-76.3418	-76.0658	-76.3635	-76.0671	-76.3703	-76.8488	-77.1917	-76.8533	-77.211	-76.8543	-77.2165
2.89872	59_Ethyne-Water_CH-O_1.00_dimer.out	-152.913	-153.538	-152.923	-153.579	-152.925	-153.591	-76.8487	-77.1915	-76.8533	-77.2109	-76.8543	-77.2165	-76.0603	-76.3415	-76.0658	-76.3634	-76.0671	-76.3703	-76.0604	-76.3417	-76.0658	-76.3635	-76.0671	-76.3703	-76.8488	-77.1916	-76.8533	-77.211	-76.8543	-77.2165
2.79927	59_Ethyne-Water_CH-O_1.05_dimer.out	-152.913	-153.538	-152.923	-153.579	-152.925	-153.591	-76.8487	-77.1915	-76.8533	-77.2109	-76.8543	-77.2165	-76.0603	-76.3415	-76.0658	-76.3634	-76.0671	-76.3703	-76.0604	-76.3417	-76.0658	-76.3635	-76.0671	-76.3703	-76.8488	-77.1916	-76.8533	-77.211	-76.8543	-77.2165
2.62788	59_Ethyne-Water_CH-O_1.10_dimer.out	-152.913	-153.537	-152.923	-153.579	-152.925	-153.591	-76.8487	-77.1915	-76.8533	-77.2109	-76.8543	-77.2165	-76.0603	-76.3415	-76.0658	-76.3634	-76.0671	-76.3703	-76.0604	-76.3417	-76.0658	-76.3635	-76.0671	-76.3703	-76.8488	-77.1916	-76.8533	-77.211	-76.8543	-77.2165
1.99931	59_Ethyne-Water_CH-O_1.25_dimer.out	-152.912	-153.536	-152.922	-153.578	-152.924	-153.59	-76.8487	-77.1915	-76.8533	-77.2109	-76.8543	-77.2165	-76.0603	-76.3415	-76.0658	-76.3634	-76.0671	-76.3703	-76.0603	-76.3416	-76.0658	-76.3634	-76.0671	-76.3703	-76.8487	-77.1916	-76.8533	-77.2109	-76.8543	-77.2165
1.17815	59_Ethyne-Water_CH-O_1.50_dimer.out	-152.911	-153.535	-152.921	-153.576	-152.923	-153.589	-76.8487	-77.1915	-76.8533	-77.2109	-76.8543	-77.2165	-76.0603	-76.3415	-76.0658	-76.3634	-76.0671	-76.3703	-76.0603	-76.3416	-76.0658	-76.3634	-76.0671	-76.3703	-76.8487	-77.1916	-76.8533	-77.2109	-76.8543	-77.2165
0.461297	59_Ethyne-Water_CH-O_2.00_dimer.out	-152.91	-153.534	-152.92	-153.575	-152.922	-153.587	-76.8487	-77.1915	-76.8533	-77.2109	-76.8543	-77.2165	-76.0603	-76.3415	-76.0658	-76.3634	-76.0671	-76.3703	-76.0603	-76.3416	-76.0658	-76.3634	-76.0671	-76.3703	-76.8487	-77.1915	-76.8533	-77.2109	-76.8543	-77.2165
4.30609	60_Ethyne-AcOH_OH-pi_0.90_dimer.out	-304.755	-305.968	-304.775	-306.049	-304.779	-306.073	-76.8486	-77.1915	-76.8532	-77.2109	-76.8542	-77.2164	-227.905	-228.77	-227.92	-228.831	-227.923	-228.85	-227.905	-228.77	-227.92	-228.831	-227.923	-228.85	-76.8487	-77.1919	-76.8532	-77.2109	-76.8542	-77.2164
4.7866	60_Ethyne-AcOH_OH-pi_0.95_dimer.out	-304.757	-305.969	-304.776	-306.049	-304.781	-306.074	-76.8486	-77.1915	-76.8532	-77.2109	-76.8542	-77.2164	-227.905	-228.77	-227.92	-228.831	-227.923	-228.85	-227.905	-228.77	-227.92	-228.831	-227.923	-228.85	-76.8487	-77.1918	-76.8532	-77.2109	-76.8542	-77.2164
4.85415	60_Ethyne-AcOH_OH-pi_1.00_dimer.out	-304.758	-305.969	-304.777	-306.05	-304.782	-306.074	-76.8486	-77.1915	-76.8532	-77.2109	-76.8542	-77.2164	-227.905	-228.77	-227.92	-228.831	-227.923	-228.85	-227.905	-228.77	-227.92	-228.831	-227.923	-228.85	-76.8487	-77.1917	-76.8532	-77.2109	-76.8542	-77.2164
4.67874	60_Ethyne-AcOH_OH-pi_1.05_dimer.out	-304.758	-305.969	-304.778	-306.049	-304.782	-306.074	-76.8486	-77.1915	-76.8532	-77.2109	-76.8542	-77.2164	-227.905	-228.77	-227.92	-228.831	-227.923	-228.85	-227.905	-228.77	-227.92	-228.831	-227.923	-228.85	-76.8487	-77.1917	-76.8532	-77.2109	-76.8542	-77.2163
4.37113	60_Ethyne-AcOH_OH-pi_1.10_dimer.out	-304.758	-305.969	-304.778	-306.049	-304.782	-306.073	-76.8486	-77.1915	-76.8532	-77.2109	-76.8542	-77.2164	-227.905	-228.77	-227.92	-228.831	-227.923	-228.85	-227.905	-228.77	-227.92	-228.831	-227.923	-228.85	-76.8487	-77.1917	-76.8532	-77.2109	-76.8542	-77.2164
3.23436	60_Ethyne-AcOH_OH-pi_1.25_dimer.out	-304.758	-305.967	-304.777	-306.047	-304.782	-306.071	-76.8486	-77.1915	-76.8532	-77.2109	-76.8542	-77.2164	-227.905	-228.77	-227.92	-228.831	-227.923	-228.85	-227.905	-228.77	-227.92	-228.831	-227.923	-228.85	-76.8487	-77.1916	-76.8532	-77.2109	-76.8542	-77.2164
1.76008	60_Ethyne-AcOH_OH-pi_1.50_dimer.out	-304.756	-305.964	-304.775	-306.045	-304.78	-306.069	-76.8486	-77.1915	-76.8532	-77.2109	-76.8542	-77.2164	-227.905	-228.77	-227.92	-228.831	-227.923	-228.85	-227.905	-228.77	-227.92	-228.831	-227.923	-228.85	-76.8486	-77.1915	-76.8532	-77.2109	-76.8542	-77.2164
0.555852	60_Ethyne-AcOH_OH-pi_2.00_dimer.out	-304.754	-305.962	-304.774	-306.043	-304.778	-306.067	-76.8486	-77.1915	-76.8532	-77.2109	-76.8542	-77.2164	-227.905	-228.77	-227.92	-228.831	-227.923	-228.85	-227.905	-228.77	-227.92	-228.831	-227.923	-228.85	-76.8486	-77.1915	-76.8532	-77.2109	-76.8542	-77.2164
2.62929	61_Pentane-AcOH_0.90_dimer.out	-424.303	-426.178	-424.33	-426.292	-424.337	-426.326	-196.404	-197.404	-196.416	-197.457	-196.419	-197.472	-227.905	-228.77	-227.92	-228.831	-227.923	-228.85	-227.905	-228.771	-227.92	-228.831	-227.923	-228.85	-196.404	-197.404	-196.416	-197.457	-196.419	-197.472
2.83503	61_Pentane-AcOH_0.95_dimer.out	-424.305	-426.179	-424.332	-426.292	-424.339	-426.326	-196.404	-197.404	-196.416	-197.457	-196.419	-197.472	-227.905	-228.77	-227.92	-228.831	-227.923	-228.85	-227.905	-228.771	-227.92	-228.831	-227.923	-228.85	-196.404	-197.404	-196.416	-197.457	-196.419	-197.472
2.8197	61_Pentane-AcOH_1.00_dimer.out	-424.307	-426.179	-424.334	-426.292	-424.34	-426.326	-196.404	-197.404	-196.416	-197.457	-196.419	-197.472	-227.905	-228.77	-227.92	-228.831	-227.923	-228.85	-227.905	-228.771	-227.92	-228.831	-227.923	-228.85	-196.404	-197.404	-196.416	-197.457	-196.419	-197.472
2.67689	61_Pentane-AcOH_1.05_dimer.out	-424.308	-426.178	-424.334	-426.292	-424.341	-426.326	-196.404	-197.404	-196.416	-197.457	-196.419	-197.472	-227.905	-228.77	-227.92	-228.831	-227.923	-228.85	-227.905	-228.771	-227.92	-228.831	-227.923	-228.85	-196.404	-197.404	-196.416	-197.457	-196.419	-197.472
2.46742	61_Pentane-AcOH_1.10_dimer.out	-424.308	-426.178	-424.335	-426.292	-424.341	-426.326	-196.404	-197.404	-196.416	-197.457	-196.419	-197.472	-227.905	-228.77	-227.92	-228.831	-227.923	-228.85	-227.905	-228.77	-227.92	-228.831	-227.923	-228.85	-196.404	-197.404	-196.416	-197.457	-196.419	-197.472
1.75749	61_Pentane-AcOH_1.25_dimer.out	-424.309	-426.177	-424.336	-426.29			-196.404	-197.404	-196.416	-197.457	-196.419	-197.472	-227.905	-228.77	-227.92	-228.831	-227.923	-228.85	-227.905	-228.77	-227.92	-228.831	-227.923	-228.85	-196.404	-197.404	-196.416	-197.457	-196.419	-197.472
0.772646	61_Pentane-AcOH_1.50_dimer.out	-424.309	-426.175	-424.336	-426.289	-424.342	-426.323	-196.404	-197.404	-196.416	-197.457	-196.419	-197.472	-227.905	-228.77	-227.92	-228.831	-227.923	-228.85	-227.905	-228.77	-227.92	-228.831	-227.923	-228.85	-196.404	-197.404	-196.416	-197.457	-196.419	-197.472
0.165994	61_Pentane-AcOH_2.00_dimer.out	-424.309	-426.174	-424.336	-426.288	-424.342	-426.322	-196.404	-197.404	-196.416	-197.457	-196.419	-197.472	-227.905	-228.77	-227.92	-228.831	-227.923	-228.85	-227.905	-228.77	-227.92	-228.831	-227.923	-228.85	-196.404	-197.404	-196.416	-197.457	-196.419	-197.472
3.07359	62_Pentane-AcNH2_0.90_dimer.out	-404.46	-406.316	-404.485	-406.424	-404.491	-406.456	-196.404	-197.404	-196.416	-197.457	-196.419	-197.472	-208.063	-208.907	-208.076	-208.962	-208.079	-208.979	-208.063	-208.907	-208.076	-208.963	-208.079	-208.979	-196.404	-197.404	-196.416	-197.457	-196.419	-197.472
3.42638	62_Pentane-AcNH2_0.95_dimer.out	-404.463	-406.316	-404.488	-406.424	-404.494	-406.457	-196.404	-197.404	-196.416	-197.457	-196.419	-197.472	-208.063	-208.907	-208.076	-208.962	-208.079	-208.979	-208.063	-208.907	-208.076	-208.963	-208.079	-208.979	-196.404	-197.404	-196.416	-197.457	-196.419	-197.472
3.43722	62_Pentane-AcNH2_1.00_dimer.out	-404.464	-406.316	-404.49	-406.424	-404.496	-406.457	-196.404	-197.404	-196.416	-197.457	-196.419	-197.472	-208.063	-208.907	-208.076	-208.962	-208.079	-208.979	-208.063	-208.907	-208.076	-208.962	-208.079	-208.979	-196.404	-197.404	-196.416	-197.457	-196.419	-197.472
3.25919	62_Pentane-AcNH2_1.05_dimer.out	-404.465	-406.316	-404.491	-406.424	-404.497	-406.456	-196.404	-197.404	-196.416	-197.457	-196.419	-197.472	-208.063	-208.907	-208.076	-208.962	-208.079	-208.979	-208.063	-208.907	-208.076	-208.962	-208.079	-208.979	-196.404	-197.404	-196.416	-197.457	-196.419	-197.472
2.98775	62_Pentane-AcNH2_1.10_dimer.out	-404.466	-406.315	-404.492	-406.424	-404.497	-406.456	-196.404	-197.404	-196.416	-197.457	-196.419	-197.472	-208.063	-208.907	-208.076	-208.962	-208.079	-208.979	-208.063	-208.907	-208.076	-208.962	-208.079	-208.979	-196.404	-197.404	-196.416	-197.457	-196.419	-197.472
2.07844	62_Pentane-AcNH2_1.25_dimer.out	-404.467	-406.314	-404.492	-406.422	-404.498	-406.454	-196.404	-197.404	-196.416	-197.457	-196.419	-197.472	-208.063	-208.907	-208.076	-208.962	-208.079	-208.979	-208.063	-208.907	-208.076	-208.962	-208.079	-208.979	-196.404	-197.404	-196.416	-197.457	-196.419	-197.472
1.02451	62_Pentane-AcNH2_1.50_dimer.out	-404.467	-406.312	-404.493	-406.42	-404.498	-406.453	-196.404	-197.404	-196.416	-197.457	-196.419	-197.472	-208.063	-208.907	-208.076	-208.962	-208.079	-208.979	-208.063	-208.907	-208.076	-208.962	-208.079	-208.979	-196.404	-197.404	-196.416	-197.457	-196.419	-197.472
0.268049	62_Pentane-AcNH2_2.00_dimer.out	-404.467	-406.311	-404.492	-406.419	-404.498	-406.451	-196.404	-197.404	-196.416	-197.457	-196.419	-197.472	-208.063	-208.907	-208.076	-208.962	-208.079	-208.979	-208.063	-208.907	-208.076	-208.962	-208.079	-208.979	-196.404	-197.404	-196.416	-197.457	-196.419	-197.472
2.54659	63_Benzene-AcOH_0.90_dimer.out	-458.678	-460.593	-458.706	-460.712	-458.712	-460.748	-230.781	-231.818	-230.794	-231.877	-230.797	-231.894	-227.905	-228.77	-227.92	-228.831	-227.923	-228.85	-227.905	-228.771	-227.92	-228.831	-227.923	-228.85	-230.781	-231.819	-230.794	-231.877	-230.797	-231.894
3.44386	63_Benzene-AcOH_0.95_dimer.out	-458.682	-460.595	-458.71	-460.714	-458.716	-460.749	-230.781	-231.818	-230.794	-231.877	-230.797	-231.894	-227.905	-228.77	-227.92	-228.831	-227.923	-228.85	-227.905	-228.771	-227.92	-228.831	-227.923	-228.85	-230.781	-231.819	-230.794	-231.877	-230.797	-231.894
3.67136	63_Benzene-AcOH_1.00_dimer.out	-458.684	-460.595	-458.712	-460.714	-458.719	-460.75	-230.781	-231.818	-230.794	-231.877	-230.797	-231.894	-227.905	-228.77	-227.92	-228.831	-227.923	-228.85	-227.905	-228.771	-227.92	-228.831	-227.923	-228.85	-230.781	-231.819	-230.794	-231.877	-230.797	-231.894
3.54622	63_Benzene-AcOH_1.05_dimer.out	-458.686	-460.594	-458.714	-460.714	-458.72	-460.749	-230.781	-231.818	-230.794	-231.877	-230.797	-231.894	-227.905	-228.77	-227.92	-228.831	-227.923	-228.85	-227.905	-228.771	-227.92	-228.831	-227.923	-228.85	-230.781	-231.819	-230.794	-231.877	-230.797	-231.894
3.25335	63_Benzene-AcOH_1.10_dimer.out	-458.686	-460.594	-458.715	-460.713	-458.721	-460.749	-230.781	-231.818	-230.794	-231.877	-230.797	-231.894	-227.905	-228.77	-227.92	-228.831	-227.923	-228.85	-227.905	-228.77	-227.92	-228.831	-227.923	-228.85	-230.781	-231.818	-230.794	-231.877	-230.797	-231.894
2.19512	63_Benzene-AcOH_1.25_dimer.out	-458.687	-460.592	-458.715	-460.711	-458.721	-460.747	-230.781	-231.818	-230.794	-231.877	-230.797	-231.894	-227.905	-228.77	-227.92	-228.831	-227.923	-228.85	-227.905	-228.77	-227.92	-228.831	-227.923	-228.85	-230.781	-231.818	-230.794	-231.877	-230.797	-231.894
1.00733	63_Benzene-AcOH_1.50_dimer.out	-458.687	-460.59	-458.715	-460.709	-458.721	-460.745	-230.781	-231.818	-230.794	-231.877	-230.797	-231.894	-227.905	-228.77	-227.92	-228.831	-227.923	-228.85	-227.905	-228.77	-227.92	-228.831	-227.923	-228.85	-230.781	-231.818	-230.794	-231.877	-230.797	-231.894
0.258702	63_Benzene-AcOH_2.00_dimer.out	-458.686	-460.589	-458.714	-460.708	-458.721	-460.744	-230.781	-231.818	-230.794	-231.877	-230.797	-231.894	-227.905	-228.77	-227.92	-228.831	-227.923	-228.85	-227.905	-228.77	-227.92	-228.831	-227.923	-228.85	-230.781	-231.818	-230.794	-231.877	-230.797	-231.894
2.52687	64_Peptide-Ethene_0.90_dimer.out	-325.163	-326.587	-325.184	-326.674	-325.188	-326.699	-247.103	-248.14	-247.118	-248.206	-247.122	-248.226	-78.0645	-78.4426	-78.0693	-78.4633	-78.0704	-78.4692	-78.0645	-78.443	-78.0693	-78.4635	-78.0705	-78.4693	-247.103	-248.141	-247.118	-248.206	-247.122	-248.226
2.88149	64_Peptide-Ethene_0.95_dimer.out	-325.165	-326.588	-325.186	-326.674	-325.19	-326.7	-247.103	-248.14	-247.118	-248.206	-247.122	-248.226	-78.0645	-78.4426	-78.0693	-78.4633	-78.0704	-78.4692	-78.0645	-78.4429	-78.0693	-78.4634	-78.0705	-78.4693	-247.103	-248.141	-247.118	-248.206	-247.122	-248.226
2.9279	64_Peptide-Ethene_1.00_dimer.out	-325.167	-326.588	-325.187	-326.674	-325.192	-326.7	-247.103	-248.14	-247.118	-248.206	-247.122	-248.226	-78.0645	-78.4426	-78.0693	-78.4633	-78.0704	-78.4692	-78.0645	-78.4428	-78.0693	-78.4634	-78.0705	-78.4693	-247.103	-248.141	-247.118	-248.206	-247.122	-248.226
2.80104	64_Peptide-Ethene_1.05_dimer.out	-325.167	-326.588	-325.188	-326.674	-325.192	-326.7	-247.103	-248.14	-247.118	-248.206	-247.122	-248.226	-78.0645	-78.4426	-78.0693	-78.4633	-78.0704	-78.4692	-78.0645	-78.4428	-78.0693	-78.4634	-78.0705	-78.4693	-247.103	-248.141	-247.118	-248.206	-247.122	-248.226
2.58541	64_Peptide-Ethene_1.10_dimer.out	-325.168	-326.587	-325.188	-326.674	-325.193	-326.699	-247.103	-248.14	-247.118	-248.206	-247.122	-248.226	-78.0645	-78.4426	-78.0693	-78.4633	-78.0704	-78.4692	-78.0645	-78.4428	-78.0693	-78.4634	-78.0705	-78.4693	-247.103	-248.141	-247.118	-248.206	-247.122	-248.226
1.8281	64_Peptide-Ethene_1.25_dimer.out	-325.168	-326.586	-325.189	-326.672	-325.193	-326.698	-247.103	-248.14	-247.118	-248.206	-247.122	-248.226	-78.0645	-78.4426	-78.0693	-78.4633	-78.0704	-78.4692	-78.0645	-78.4427	-78.0693	-78.4634	-78.0705	-78.4692	-247.103	-248.14	-247.118	-248.206	-247.122	-248.226
0.866895	64_Peptide-Ethene_1.50_dimer.out	-325.168	-326.584	-325.188	-326.671	-325.193	-326.697	-247.103	-248.14	-247.118	-248.206	-247.122	-248.226	-78.0645	-78.4426	-78.0693	-78.4633	-78.0704	-78.4692	-78.0645	-78.4426	-78.0693	-78.4633	-78.0704	-78.4692	-247.103	-248.14	-247.118	-248.206	-247.122	-248.226
0.187642	64_Peptide-Ethene_2.00_dimer.out	-325.167	-326.583	-325.188	-326.67	-325.192	-326.696	-247.103	-248.14	-247.118	-248.206	-247.122	-248.226	-78.0645	-78.4426	-78.0693	-78.4633	-78.0704	-78.4692	-78.0645	-78.4426	-78.0693	-78.4633	-78.0704	-78.4692	-247.103	-248.14	-247.118	-248.206	-247.122	-248.226
3.66054	65_Pyridine-Ethyne_0.90_dimer.out	-323.63	-325.044	-323.648	-325.126	-323.652	-325.149	-246.779	-247.847	-246.793	-247.909	-246.796	-247.927	-76.8485	-77.1915	-76.8531	-77.2109	-76.8541	-77.2164	-76.8486	-77.1918	-76.8531	-77.211	-76.8541	-77.2164	-246.779	-247.847	-246.793	-247.909	-246.796	-247.927
4.00764	65_Pyridine-Ethyne_0.95_dimer.out	-323.631	-325.045	-323.649	-325.126	-323.653	-325.15	-246.779	-247.847	-246.793	-247.909	-246.796	-247.927	-76.8485	-77.1915	-76.8531	-77.2109	-76.8541	-77.2164	-76.8486	-77.1917	-76.8531	-77.2109	-76.8541	-77.2164	-246.779	-247.847	-246.793	-247.909	-246.796	-247.927
4.06567	65_Pyridine-Ethyne_1.00_dimer.out	-323.631	-325.045	-323.65	-325.126	-323.654	-325.15	-246.779	-247.847	-246.793	-247.909	-246.796	-247.927	-76.8485	-77.1915	-76.8531	-77.2109	-76.8541	-77.2164	-76.8486	-77.1917	-76.8531	-77.2109	-76.8541	-77.2164	-246.779	-247.847	-246.793	-247.909	-246.796	-247.927
3.94577	65_Pyridine-Ethyne_1.05_dimer.out	-323.631	-325.045	-323.65	-325.126	-323.654	-325.15	-246.779	-247.847	-246.793	-247.909	-246.796	-247.927	-76.8485	-77.1915	-76.8531	-77.2109	-76.8541	-77.2164	-76.8486	-77.1917	-76.8531	-77.2109	-76.8541	-77.2164	-246.779	-247.847	-246.793	-247.909	-246.796	-247.927
3.72406	65_Pyridine-Ethyne_1.10_dimer.out	-323.631	-325.044	-323.65	-325.126	-323.654	-325.149	-246.779	-247.847	-246.793	-247.909	-246.796	-247.927	-76.8485	-77.1915	-76.8531	-77.2109	-76.8541	-77.2164	-76.8486	-77.1917	-76.8531	-77.2109	-76.8541	-77.2164	-246.779	-247.847	-246.793	-247.909	-246.796	-247.927
2.8661	65_Pyridine-Ethyne_1.25_dimer.out	-323.631	-325.043	-323.65	-325.124	-323.654	-325.148	-246.779	-247.847	-246.793	-247.909	-246.796	-247.927	-76.8485	-77.1915	-76.8531	-77.2109	-76.8541	-77.2164	-76.8486	-77.1916	-76.8531	-77.2109	-76.8541	-77.2164	-246.779	-247.847	-246.793	-247.909	-246.796	-247.927
1.67923	65_Pyridine-Ethyne_1.50_dimer.out	-323.629	-325.041	-323.648	-325.122	-323.652	-325.146	-246.779	-247.847	-246.793	-247.909	-246.796	-247.927	-76.8485	-77.1915	-76.8531	-77.2109	-76.8541	-77.2164	-76.8486	-77.1916	-76.8531	-77.2109	-76.8541	-77.2164	-246.779	-247.847	-246.793	-247.909	-246.796	-247.927
0.618433	65_Pyridine-Ethyne_2.00_dimer.out	-323.628	-325.039	-323.647	-325.121	-323.651	-325.145	-246.779	-247.847	-246.793	-247.909	-246.796	-247.927	-76.8485	-77.1915	-76.8531	-77.2109	-76.8541	-77.2164	-76.8485	-77.1915	-76.8531	-77.2109	-76.8541	-77.2164	-246.779	-247.847	-246.793	-247.909	-246.796	-247.927
3.35962	66_MeNH2-Pyridine_0.90_dimer.out	-342.029	-343.557	-342.05	-343.645	-342.054	-343.671	-95.2551	-95.7045	-95.2613	-95.7308	-95.2627	-95.7385	-246.778	-247.847	-246.793	-247.909	-246.796	-247.927	-246.779	-247.847	-246.793	-247.909	-246.796	-247.927	-95.2552	-95.7049	-95.2613	-95.7309	-95.2627	-95.7386
3.79562	66_MeNH2-Pyridine_0.95_dimer.out	-342.032	-343.558	-342.052	-343.646	-342.056	-343.672	-95.2551	-95.7045	-95.2613	-95.7308	-95.2627	-95.7385	-246.778	-247.847	-246.793	-247.909	-246.796	-247.927	-246.779	-247.847	-246.793	-247.909	-246.796	-247.927	-95.2552	-95.7048	-95.2613	-95.7309	-95.2627	-95.7386
3.89254	66_MeNH2-Pyridine_1.00_dimer.out	-342.033	-343.558	-342.054	-343.646	-342.058	-343.672	-95.2551	-95.7045	-95.2613	-95.7308	-95.2627	-95.7385	-246.778	-247.847	-246.793	-247.909	-246.796	-247.927	-246.779	-247.847	-246.793	-247.909	-246.796	-247.927	-95.2552	-95.7048	-95.2613	-95.7309	-95.2627	-95.7386
3.78432	66_MeNH2-Pyridine_1.05_dimer.out	-342.034	-343.557	-342.054	-343.646	-342.059	-343.672	-95.2551	-95.7045	-95.2613	-95.7308	-95.2627	-95.7385	-246.778	-247.847	-246.793	-247.909	-246.796	-247.927	-246.779	-247.847	-246.793	-247.909	-246.796	-247.927	-95.2552	-95.7047	-95.2613	-95.7309	-95.2627	-95.7386
3.56039	66_MeNH2-Pyridine_1.10_dimer.out	-342.035	-343.557	-342.055	-343.645	-342.06	-343.671	-95.2551	-95.7045	-95.2613	-95.7308	-95.2627	-95.7385	-246.778	-247.847	-246.793	-247.909	-246.796	-247.927	-246.779	-247.847	-246.793	-247.909	-246.796	-247.927	-95.2552	-95.7047	-95.2613	-95.7308	-95.2627	-95.7385
2.67699	66_MeNH2-Pyridine_1.25_dimer.out	-342.035	-343.556	-342.056	-343.644	-342.06	-343.67	-95.2551	-95.7045	-95.2613	-95.7308	-95.2627	-95.7385	-246.778	-247.847	-246.793	-247.909	-246.796	-247.927	-246.778	-247.847	-246.793	-247.909	-246.796	-247.927	-95.2552	-95.7046	-95.2613	-95.7308	-95.2627	-95.7385
1.4875	66_MeNH2-Pyridine_1.50_dimer.out	-342.035	-343.554	-342.055	-343.642	-342.06	-343.668	-95.2551	-95.7045	-95.2613	-95.7308	-95.2627	-95.7385	-246.778	-247.847	-246.793	-247.909	-246.796	-247.927	-246.778	-247.847	-246.793	-247.909	-246.796	-247.927	-95.2552	-95.7045	-95.2613	-95.7308	-95.2627	-95.7385
0.490416	66_MeNH2-Pyridine_2.00_dimer.out	-342.034	-343.552	-342.055	-343.641	-342.059	-343.666	-95.2551	-95.7045	-95.2613	-95.7308	-95.2627	-95.7385	-246.778	-247.847	-246.793	-247.909	-246.796	-247.927	-246.778	-247.847	-246.793	-247.909	-246.796	-247.927	-95.2551	-95.7045	-95.2613	-95.7308	-95.2627	-95.7385

## Sheet: PNO stat
																				exp	3.22					exp	3																	-100
																				coeff	0.655634					coeff	1.04918
			PNO-haVTZ/Default						PNO-haVQZ/Default						PNO-haV5Z/Default						PNO-haV{T,Q}Z/Default						PNO-haV{Q,5}Z/Default						PNO-haVTZ/Tight						PNO-haVQZ/Tight						PNO-haV5Z/Tight
			RAW		CP		Half		RAW		CP		Half		RAW		CP		Half		RAW		CP		Half		RAW		CP		Half		RAW		CP		Half		RAW		CP		Half		RAW		CP		Half
MSD	Full		-0.0294511		-0.312027		-0.170739		-0.0664881		-0.125889		-0.0961883		-0.0522305		-0.0677991		-0.0600148		-0.0907708		-0.00384956		-0.0473102		-0.0372717		-0.00685275		-0.0220622		0.158535		-0.261908		-0.0516864		0.0214469		-0.101744		-0.0401487		#VALUE!		#VALUE!		-0.70204
RMSD	Full		0.132358		0.428456		0.258394		0.0983994		0.174876		0.135874		0.0747692		0.0986273		0.0863855		0.130574		0.027336		0.0717586		0.0561437		0.0284932		0.0400683		0.299174		0.361902		0.16326		0.0714866		0.143301		0.0718192		0.027709		0.0695685		0.0457685
	H bonds		0.179902		0.550378		0.362502		0.119664		0.225419		0.171694		0.0894598		0.12924		0.109051		0.0853533		0.0207291		0.0505551		0.0628715		0.0347057		0.0467156		0.0606029		0.485696		0.237136		0.0368813		0.19011		0.109483		0.0348247		0.096911		0.0650527
	pi stack		0.132335		0.437848		0.197132		0.112177		0.183042		0.147071		0.0953841		0.105903		0.100612		0.235591		0.0422416		0.130253		0.0832261		0.0372829		0.0577808		0.651051		0.315391		0.172425		0.15581		0.137003		0.0283098		0.0416235		0.0206724		0.0208087
	London		0.10459		0.332563		0.20434		0.0941538		0.138676		0.116118		0.0635196		0.0744689		0.0689408		0.118138		0.0282986		0.0676775		0.039579		0.020062		0.027677		0.219898		0.278096		0.0908611		0.0470774		0.110879		0.0517142		0.0206454		0.048376		0.0323959
	mixed		0.068739		0.299499		0.150476		0.0585698		0.115024		0.0862795		0.0455332		0.0606586		0.0529087		0.105176		0.023645		0.0509257		0.037077		0.0183676		0.0249225		0.218584		0.246822		0.0553011		0.0414836		0.0939499		0.0331337		0.0132432		0.0423052		0.0216162
		PNO-haVTZ/Default						PNO-haVQZ/Default						PNO-haV5Z/Default						PNO-haV{T,Q}Z/Default						PNO-haV{Q,5}Z/Default						PNO-haVTZ/Tight						PNO-haVQZ/Tight						PNO-haV5Z/Tight
REF	systems	RAW		CP		Half		RAW		CP		Half		RAW		CP		Half		RAW		CP		Half		RAW		CP		Half		RAW		CP		Half		RAW		CP		Half		RAW		CP		Half
4.66552	01_Water-Water_0.90_dimer.out	4.54341	-0.122111	4.22941	-0.436119	4.38641	-0.279115	4.60062	-0.0649038	4.48376	-0.181769	4.54219	-0.123336	4.59134	-0.0741819	4.57174	-0.0937853	4.58154	-0.0839836	4.63813	-0.0273971	4.65052	-0.0150083	4.64432	-0.0212027	4.58161	-0.0839164	4.66405	-0.00147461	4.62283	-0.0426955	4.67088	0.00535216	4.2318	-0.433721	4.45134	-0.214184	4.66662	0.00109066	4.49746	-0.168062	4.58204	-0.0834856	4.65615	-0.00937904	4.58704	-0.0784867	4.62159	-0.0439329
4.95383	01_Water-Water_0.95_dimer.out	4.84939	-0.104438	4.58161	-0.372226	4.7155	-0.238332	4.89876	-0.0550692	4.80101	-0.152822	4.84989	-0.103946	4.89382	-0.0600112	4.88364	-0.0701894	4.88873	-0.0651003	4.93113	-0.0227015	4.94486	-0.00897408	4.93799	-0.0158378	4.88864	-0.0651963	4.97034	0.0165075	4.92949	-0.0243444	4.97177	0.0179397	4.5963	-0.357532	4.78404	-0.169796	4.95841	0.00458069	4.81633	-0.137507	4.88737	-0.0664632	4.94874	-0.0050916	4.89162	-0.0622138	4.92018	-0.0336527
4.94643	01_Water-Water_1.00_dimer.out	4.87772	-0.068716	4.64916	-0.29727	4.76344	-0.182993	4.90214	-0.0442906	4.81814	-0.128295	4.86014	-0.0862927	4.89412	-0.0523121	4.89111	-0.0553241	4.89262	-0.0538181	4.91816	-0.0282764	4.92893	-0.0175088	4.92354	-0.0228926	4.88571	-0.0607281	4.96767	0.0212353	4.92669	-0.0197464	4.97864	0.0322081	4.65687	-0.289561	4.81776	-0.128677	4.95354	0.00710605	4.83364	-0.112799	4.89359	-0.0528466	4.94376	-0.00267608	4.89694	-0.0494946	4.92035	-0.0260853
4.76207	01_Water-Water_1.05_dimer.out	4.71928	-0.0427885	4.51897	-0.243101	4.61913	-0.142945	4.73138	-0.0306943	4.65935	-0.102721	4.69537	-0.0667078	4.71369	-0.0483786	4.71604	-0.046038	4.71486	-0.0472083	4.73931	-0.0227649	4.75139	-0.0106837	4.74535	-0.0167243	4.69514	-0.0669326	4.77551	0.0134331	4.73532	-0.0267498	4.80802	0.0459469	4.53191	-0.23016	4.66997	-0.0921065	4.77207	0.00999543	4.67064	-0.0914359	4.72135	-0.0407202	4.76108	-0.000995335	4.72311	-0.0389597	4.7421	-0.0199775
4.47984	01_Water-Water_1.10_dimer.out	4.46068	-0.0191556	4.29042	-0.189416	4.37555	-0.104286	4.4546	-0.0252368	4.39508	-0.0847566	4.42484	-0.0549967	4.43618	-0.0436529	4.44351	-0.0363298	4.43985	-0.0399914	4.45061	-0.0292238	4.4637	-0.0161385	4.45716	-0.0226812	4.41686	-0.0629747	4.49432	0.0144785	4.45559	-0.0242481	4.5374	0.0575579	4.29857	-0.181263	4.41799	-0.0618525	4.49058	0.0107464	4.40437	-0.0754688	4.44748	-0.0323612	4.48012	0.000285339	4.44912	-0.0307136	4.46462	-0.0152141
3.4705	01_Water-Water_1.25_dimer.out	3.49394	0.0234478	3.3779	-0.0925939	3.43592	-0.0345731	3.45677	-0.0137255	3.42352	-0.0469745	3.44015	-0.03035	3.43255	-0.0379437	3.45021	-0.0202856	3.44138	-0.0291146	3.4324	-0.0380975	3.45343	-0.0170648	3.44291	-0.0275812	3.40714	-0.063353	3.47821	0.00771588	3.44268	-0.0278186	3.53372	0.0632231	3.38382	-0.0866726	3.45877	-0.0117247	3.47955	0.00905704	3.42799	-0.0425025	3.45377	-0.0167227	3.46971	-0.000788864	3.4547	-0.0157989	3.4622	-0.00829388
2.11656	01_Water-Water_1.50_dimer.out	2.1335	0.0169363	2.09064	-0.0259208	2.11207	-0.00449225	2.10726	-0.009302	2.09163	-0.024936	2.09945	-0.017119	2.08623	-0.0303336	2.08435	-0.0322161	2.08529	-0.0312749	2.09006	-0.0265047	2.09227	-0.0242904	2.09117	-0.0253975	2.06416	-0.0523995	2.07671	-0.0398543	2.07044	-0.0461269	2.15543	0.0388635	2.09716	-0.0194044	2.12629	0.00972952	2.12003	0.00347021	2.09899	-0.0175747	2.10951	-0.00705225	2.11124	-0.00532734	2.10447	-0.0120982	2.10785	-0.00871275
0.874474	01_Water-Water_2.00_dimer.out	0.898811	0.0243364	0.878158	0.00368393	0.888484	0.0140102	0.876304	0.00182977	0.870069	-0.00440526	0.873186	-0.00128774	0.872972	-0.00150179	0.87183	-0.00264386	0.872401	-0.00207283	0.861548	-0.0129264	0.864765	-0.00970881	0.863157	-0.0113176	0.869477	-0.0049972	0.873678	-0.000795832	0.871578	-0.00289652	0.898692	0.0242182	0.878398	0.00392401	0.888545	0.0140711	0.877619	0.00314526	0.871432	-0.00304176	0.874526	5.1747e-05	0.873813	-0.000660929	0.872652	-0.00182182	0.873233	-0.00124138
5.29836	02_Water-MeOH_0.90_dimer.out	5.16786	-0.130505	4.74602	-0.552339	4.95694	-0.341422	5.23229	-0.0660705	5.07963	-0.21873	5.15596	-0.1424	5.22003	-0.0783311	5.18417	-0.114193	5.2021	-0.0962622	5.27454	-0.0238253	5.29836	-4.85772e-06	5.28645	-0.0119151	5.20717	-0.0911947	5.29385	-0.00451537	5.25051	-0.047855	5.34037	0.0420045	4.7758	-0.522562	5.05808	-0.240279	5.3082	0.00983746	5.09971	-0.19865	5.20396	-0.0944062	5.28854	-0.00981964	5.20086	-0.0975015	5.2447	-0.0536606
5.62873	02_Water-MeOH_0.95_dimer.out	5.52932	-0.0994132	5.17538	-0.453352	5.35235	-0.276383	5.57475	-0.0539814	5.44991	-0.178824	5.51233	-0.116403	5.54108	-0.0876481	5.51333	-0.115403	5.52721	-0.101525	5.60454	-0.0241947	5.6299	0.00116582	5.61722	-0.0115144	5.50576	-0.12297	5.57987	-0.0488624	5.54282	-0.0859164	5.68288	0.0541519	5.19883	-0.429907	5.44086	-0.187877	5.64252	0.0137857	5.46704	-0.16169	5.55478	-0.0739521	5.62399	-0.00474151	5.55121	-0.0775263	5.5876	-0.0411339
5.62675	02_Water-MeOH_1.00_dimer.out	5.55149	-0.0752608	5.27266	-0.354096	5.41208	-0.214678	5.58546	-0.0412884	5.48271	-0.144045	5.53409	-0.0926665	5.56113	-0.0656261	5.54354	-0.0832089	5.55234	-0.0744175	5.60774	-0.0190149	5.62043	-0.00632764	5.61408	-0.0126713	5.53559	-0.0911608	5.60737	-0.0193814	5.57148	-0.0552711	5.68864	0.0618916	5.27598	-0.350773	5.48231	-0.144441	5.64651	0.019756	5.49837	-0.128382	5.57244	-0.0543129	5.62809	0.00133543	5.56743	-0.0593196	5.59776	-0.0289921
5.42332	02_Water-MeOH_1.05_dimer.out	5.3579	-0.0654183	5.11827	-0.305055	5.23808	-0.185236	5.3963	-0.0270226	5.30553	-0.117792	5.35091	-0.0724072	5.37434	-0.0489841	5.36021	-0.0631093	5.36727	-0.0560467	5.42147	-0.001849	5.4283	0.00498419	5.42489	0.0015676	5.35129	-0.0720256	5.41758	-0.00573756	5.38444	-0.0388816	5.49283	0.0695108	5.1387	-0.284619	5.31577	-0.107554	5.4451	0.0217828	5.31795	-0.105366	5.38153	-0.0417918	5.4273	0.00398401	5.37668	-0.0466435	5.40199	-0.0213297
5.10642	02_Water-MeOH_1.10_dimer.out	5.06097	-0.0454467	4.85465	-0.25177	4.95781	-0.148609	5.0877	-0.018719	5.00946	-0.0969611	5.04858	-0.05784	5.07095	-0.0354626	5.05877	-0.0476488	5.06486	-0.0415557	5.10522	-0.00119537	5.11095	0.00453723	5.10809	0.00167093	5.05339	-0.0530297	5.11051	0.00408859	5.08195	-0.0244705	5.18362	0.0772001	4.87815	-0.228263	5.03089	-0.0755313	5.12917	0.0227525	5.02028	-0.086136	5.07473	-0.0316917	5.11226	0.00584635	5.06992	-0.036498	5.09109	-0.0153258
3.95632	02_Water-MeOH_1.25_dimer.out	3.95304	-0.00328101	3.82185	-0.134467	3.88745	-0.0688741	3.94828	-0.00804178	3.89651	-0.0598118	3.92239	-0.0339268	3.93834	-0.0179774	3.9293	-0.027026	3.93382	-0.0225017	3.94516	-0.0111631	3.94546	-0.0108652	3.94531	-0.0110142	3.92792	-0.0284016	3.96369	0.00737216	3.94581	-0.0105147	4.01993	0.0636127	3.84031	-0.116008	3.93012	-0.0261975	3.96692	0.0106015	3.90546	-0.050859	3.93619	-0.0201287	3.95867	0.00234767	3.93667	-0.0196528	3.94767	-0.00865257
2.39149	02_Water-MeOH_1.50_dimer.out	2.39649	0.00499625	2.33174	-0.0597501	2.36411	-0.0273769	2.3828	-0.00868884	2.35932	-0.0321694	2.37106	-0.0204291	2.38056	-0.010934	2.37818	-0.0133122	2.37937	-0.0121231	2.37383	-0.0176613	2.37741	-0.0140866	2.37562	-0.0158739	2.3782	-0.0132895	2.39796	0.00647238	2.38808	-0.00340855	2.40948	0.01799	2.34177	-0.0497183	2.37563	-0.0158642	2.39509	0.0035979	2.36902	-0.0224735	2.38205	-0.0094378	2.39042	-0.00107578	2.38322	-0.00826704	2.38682	-0.00467141
0.954245	02_Water-MeOH_2.00_dimer.out	0.962746	0.00850076	0.946473	-0.00777236	0.95461	0.000364199	0.954509	0.00026402	0.949525	-0.00472042	0.952017	-0.0022282	0.951549	-0.00269633	0.950589	-0.00365641	0.951069	-0.00317637	0.949109	-0.00513627	0.951526	-0.00271946	0.950318	-0.00392787	0.948443	-0.00580226	0.951705	-0.00254008	0.950074	-0.00417117	0.963235	0.00898996	0.947138	-0.00710755	0.955187	0.000941202	0.955816	0.0015707	0.950704	-0.00354133	0.95326	-0.000985316	0.952792	-0.00145386	0.951875	-0.00237002	0.952334	-0.00191194
6.60638	03_Water-MeNH2_0.90_dimer.out	6.4213	-0.185081	6.05482	-0.551561	6.23806	-0.368321	6.51123	-0.0951501	6.37914	-0.227246	6.44518	-0.161198	6.53441	-0.0719756	6.48454	-0.121844	6.50947	-0.0969097	6.57019	-0.0361886	6.59177	-0.0146136	6.58098	-0.0254011	6.55872	-0.0476613	6.59512	-0.0112582	6.57692	-0.0294598	6.58153	-0.024856	6.06716	-0.539223	6.32434	-0.282039	6.58859	-0.0177945	6.40274	-0.203644	6.49566	-0.110719	6.58016	-0.0262239	6.50441	-0.101977	6.54228	-0.0641003
6.95721	03_Water-MeNH2_0.95_dimer.out	6.80156	-0.155653	6.48514	-0.472068	6.64335	-0.313861	6.88087	-0.0763448	6.76961	-0.187598	6.82524	-0.131971	6.89944	-0.0577701	6.85618	-0.101031	6.87781	-0.0794004	6.93286	-0.0243477	6.95612	-0.0010888	6.94449	-0.0127182	6.91893	-0.0382819	6.94701	-0.0102063	6.93297	-0.0242441	6.94735	-0.00985887	6.50665	-0.450559	6.727	-0.230209	6.94623	-0.0109851	6.78976	-0.167448	6.868	-0.0892166	6.93785	-0.0193665	6.87454	-0.0826697	6.90619	-0.0510181
6.94056	03_Water-MeNH2_1.00_dimer.out	6.81773	-0.122834	6.54659	-0.393965	6.68216	-0.258399	6.87884	-0.0617218	6.78352	-0.157043	6.83118	-0.109382	6.89194	-0.0486222	6.85521	-0.0853504	6.87357	-0.0669863	6.9189	-0.0216545	6.93885	-0.0017089	6.92888	-0.0116817	6.90568	-0.0348784	6.93043	-0.0101319	6.91805	-0.0225051	6.94204	0.00148119	6.56535	-0.375205	6.7537	-0.186862	6.93375	-0.00681216	6.80056	-0.14	6.86715	-0.0734059	6.92629	-0.0142661	6.87306	-0.067504	6.89967	-0.040885
6.69539	03_Water-MeNH2_1.05_dimer.out	6.60024	-0.0951478	6.36968	-0.325714	6.48496	-0.210431	6.64491	-0.0504828	6.56378	-0.13161	6.60435	-0.0910466	6.65427	-0.0411183	6.62357	-0.0718224	6.63892	-0.0564703	6.67419	-0.0211989	6.69104	-0.00434912	6.68262	-0.012774	6.6641	-0.0312933	6.6863	-0.00909391	6.6752	-0.0201936	6.70422	0.00882861	6.38294	-0.312449	6.54358	-0.15181	6.69014	-0.00525477	6.57649	-0.118897	6.63332	-0.0620761	6.6845	-0.0108912	6.63935	-0.0560468	6.66192	-0.033469
6.31753	03_Water-MeNH2_1.10_dimer.out	6.23676	-0.0807675	6.04758	-0.269947	6.14217	-0.175357	6.27405	-0.0434712	6.20592	-0.111603	6.23999	-0.0775369	6.28185	-0.035679	6.25682	-0.0607104	6.26933	-0.0481947	6.29851	-0.0190185	6.30974	-0.00778661	6.30412	-0.0134025	6.29002	-0.0275037	6.31021	-0.00731532	6.30012	-0.0174095	6.33082	0.0132929	6.05854	-0.258981	6.19468	-0.122844	6.31459	-0.00293786	6.21815	-0.0993769	6.26637	-0.0511574	6.30864	-0.00889066	6.27056	-0.0469617	6.2896	-0.0279262
4.92823	03_Water-MeNH2_1.25_dimer.out	4.88144	-0.0467888	4.75493	-0.173291	4.81819	-0.11004	4.90221	-0.0260137	4.8608	-0.0674218	4.88151	-0.0467177	4.90915	-0.0190747	4.89397	-0.0342542	4.90156	-0.0266644	4.91583	-0.0123928	4.93022	0.00198968	4.92302	-0.00520155	4.91643	-0.0117945	4.92877	0.000544616	4.9226	-0.00562495	4.94588	0.0176589	4.77819	-0.150041	4.86203	-0.066191	4.93144	0.00321293	4.87021	-0.0580205	4.90082	-0.0274038	4.92555	-0.00267789	4.90369	-0.024534	4.91462	-0.013606
2.97972	03_Water-MeNH2_1.50_dimer.out	2.96658	-0.0131341	2.91257	-0.0671451	2.93958	-0.0401396	2.96342	-0.0162913	2.94566	-0.0340553	2.95454	-0.0251733	2.96802	-0.0116964	2.96407	-0.0156497	2.96604	-0.013673	2.96135	-0.0183612	2.96736	-0.0123605	2.96436	-0.0153608	2.97284	-0.00687554	2.98338	0.00366111	2.97811	-0.00160722	2.98521	0.00549479	2.91944	-0.0602782	2.95232	-0.0273917	2.97436	-0.00535481	2.95079	-0.0289256	2.96258	-0.0171402	2.97504	-0.00468084	2.96841	-0.0113073	2.97172	-0.00799409
1.14169	03_Water-MeNH2_2.00_dimer.out	1.146	0.00430998	1.13431	-0.0073789	1.14015	-0.00153446	1.13945	-0.00224094	1.13494	-0.00674787	1.13719	-0.00449441	1.13947	-0.00221898	1.13818	-0.00351165	1.13882	-0.00286532	1.13515	-0.00653596	1.13535	-0.00633414	1.13525	-0.00643505	1.13949	-0.00219594	1.14157	-0.000116281	1.14053	-0.00115611	1.14843	0.00673763	1.13667	-0.00501608	1.14255	0.000860773	1.14039	-0.00129581	1.13546	-0.006231	1.13792	-0.00376341	1.14017	-0.00151617	1.1389	-0.00279002	1.13954	-0.0021531
7.73932	04_Water-Peptide_0.90_dimer.out	7.49246	-0.246867	7.03005	-0.709278	7.26125	-0.478072	7.61218	-0.127145	7.45792	-0.281405	7.53505	-0.204275	7.65867	-0.080651	7.59856	-0.14076	7.62862	-0.110706	7.69067	-0.0486519	7.73845	-0.000877075	7.71456	-0.0247645	7.70745	-0.0318702	7.74612	0.00680168	7.72679	-0.0125342	7.73705	-0.00226849	7.09303	-0.646289	7.41504	-0.324279	7.73073	-0.00858859	7.50019	-0.239133	7.61546	-0.123861	7.72034	-0.0189857	7.62669	-0.112629	7.67352	-0.0658073
8.13066	04_Water-Peptide_0.95_dimer.out	7.92411	-0.206547	7.52995	-0.600714	7.72703	-0.403631	8.03022	-0.100441	7.89366	-0.237003	7.96194	-0.168722	8.06678	-0.0638816	8.01705	-0.113612	8.04191	-0.0887466	8.09979	-0.0308747	8.13212	0.00145839	8.11595	-0.0147082	8.10514	-0.0255239	8.14651	0.0158481	8.12582	-0.00483788	8.13452	0.00385584	7.58232	-0.548342	7.85842	-0.272243	8.13069	2.88558e-05	7.9345	-0.196161	8.03259	-0.0980661	8.12117	-0.00949533	8.04342	-0.0872375	8.08229	-0.0483664
8.12775	04_Water-Peptide_1.00_dimer.out	7.95837	-0.169382	7.62145	-0.506299	7.78991	-0.337841	8.05007	-0.0776772	7.93079	-0.196961	7.99043	-0.137319	8.07596	-0.0517886	8.03311	-0.0946412	8.05453	-0.0732149	8.1102	-0.0175524	8.1336	0.00585137	8.1219	-0.00585051	8.10312	-0.0246267	8.14046	0.012711	8.12179	-0.00595785	8.14408	0.0163325	7.66699	-0.460761	7.90553	-0.222214	8.13353	0.00578549	7.96482	-0.162933	8.04917	-0.0785735	8.12578	-0.00197058	8.05857	-0.0691769	8.09217	-0.0355737
7.87768	04_Water-Peptide_1.05_dimer.out	7.72427	-0.153412	7.45748	-0.420205	7.59087	-0.286808	7.81203	-0.0656468	7.72045	-0.157232	7.76624	-0.111439	7.83608	-0.0416064	7.80434	-0.0733458	7.82021	-0.0574761	7.86958	-0.00810474	7.89286	0.0151824	7.88122	0.00353881	7.8613	-0.0163837	7.89235	0.0146656	7.87682	-0.000859033	7.9043	0.0266217	7.49166	-0.386023	7.69798	-0.179701	7.89197	0.014292	7.74579	-0.131895	7.81888	-0.0588017	7.88367	0.00599021	7.82653	-0.0511508	7.8551	-0.0225803
7.48215	04_Water-Peptide_1.10_dimer.out	7.35729	-0.124859	7.12589	-0.356262	7.24159	-0.24056	7.42927	-0.0528845	7.34962	-0.132532	7.38944	-0.0927083	7.45041	-0.0317388	7.42283	-0.0593241	7.43662	-0.0455314	7.47646	-0.00569586	7.49631	0.0141532	7.48638	0.00422868	7.4726	-0.00955311	7.49964	0.0174843	7.48612	0.00396558	7.51857	0.0364181	7.16483	-0.317318	7.3417	-0.14045	7.50354	0.0213848	7.37592	-0.106233	7.43973	-0.0424239	7.49273	0.0105742	7.44337	-0.0387794	7.46805	-0.0141026
5.99425	04_Water-Peptide_1.25_dimer.out	5.94324	-0.0510019	5.78626	-0.207991	5.86475	-0.129496	5.97278	-0.0214699	5.92328	-0.0709655	5.94803	-0.0462177	5.98451	-0.00973233	5.9677	-0.0265433	5.97611	-0.0181378	5.99214	-0.00210772	6.01312	0.0188732	6.00263	0.00838272	5.99683	0.0025825	6.01431	0.0200636	6.00557	0.011323	6.03743	0.0431806	5.81452	-0.179728	5.92597	-0.0682737	6.01574	0.0214924	5.93602	-0.0582285	5.97588	-0.018368	6.01153	0.0172882	5.98166	-0.0125875	5.9966	0.00235036
3.83009	04_Water-Peptide_1.50_dimer.out	3.81025	-0.0198475	3.73362	-0.0964796	3.77193	-0.0581636	3.82008	-0.0100135	3.79291	-0.0371827	3.8065	-0.0235981	3.81926	-0.0108335	3.81513	-0.0149625	3.8172	-0.012898	3.82653	-0.003566	3.83179	0.00169439	3.82916	-0.000935808	3.8184	-0.0116938	3.83845	0.00835051	3.82842	-0.00167163	3.84607	0.0159724	3.75101	-0.0790814	3.79854	-0.0315545	3.83753	0.0074336	3.79939	-0.030706	3.81846	-0.0116362	3.83655	0.00645441	3.82433	-0.0057632	3.83044	0.000345604
1.43887	04_Water-Peptide_2.00_dimer.out	1.43581	-0.00305821	1.41794	-0.0209236	1.42687	-0.0119909	1.43275	-0.00611281	1.42643	-0.0124313	1.42959	-0.00927204	1.43287	-0.00599123	1.43164	-0.00722743	1.43226	-0.00660933	1.43075	-0.00811551	1.432	-0.00686341	1.43138	-0.00748946	1.433	-0.00586367	1.4371	-0.00176766	1.43505	-0.00381567	1.43843	-0.000435993	1.42237	-0.0165002	1.4304	-0.00846812	1.4354	-0.00346783	1.42961	-0.0092602	1.4325	-0.00636401	1.43535	-0.00351257	1.434	-0.00486172	1.43468	-0.00418714
5.38667	05_MeOH-MeOH_0.90_dimer.out	5.25051	-0.136153	4.78585	-0.600823	5.01818	-0.368488	5.2879	-0.0987699	5.13519	-0.251474	5.21155	-0.175122	5.28445	-0.102216	5.24799	-0.138674	5.26622	-0.120445	5.31241	-0.07426	5.36424	-0.0224293	5.33832	-0.0483447	5.28084	-0.105831	5.36634	-0.0203268	5.32359	-0.0630791	5.44452	0.0578525	4.84055	-0.546122	5.14253	-0.244135	5.38773	0.00106074	5.17169	-0.214981	5.27971	-0.10696	5.36525	-0.0214178	5.27297	-0.113693	5.31911	-0.0675554
5.77098	05_MeOH-MeOH_0.95_dimer.out	5.6516	-0.119375	5.28852	-0.482454	5.47006	-0.300915	5.6849	-0.0860795	5.5636	-0.207379	5.62425	-0.146729	5.68257	-0.0884085	5.66074	-0.110233	5.67166	-0.0993208	5.70673	-0.0642495	5.74395	-0.0270305	5.72534	-0.04564	5.68013	-0.090852	5.76267	-0.00830956	5.7214	-0.0495808	5.83674	0.0657608	5.31899	-0.451983	5.57787	-0.193111	5.77795	0.00697696	5.59558	-0.175397	5.68677	-0.0842102	5.7574	-0.0135779	5.68034	-0.0906361	5.71887	-0.052107
5.8036	05_MeOH-MeOH_1.00_dimer.out	5.71024	-0.0933609	5.39735	-0.406255	5.55379	-0.249808	5.73966	-0.0639469	5.63589	-0.167709	5.68778	-0.115828	5.7285	-0.0751064	5.71467	-0.0889305	5.72158	-0.0820184	5.75894	-0.044662	5.79229	-0.0113095	5.77562	-0.0279858	5.71679	-0.0868148	5.79733	-0.00627773	5.75706	-0.0465463	5.86982	0.066217	5.42892	-0.374681	5.64937	-0.154232	5.81484	0.011241	5.66148	-0.142119	5.73816	-0.065439	5.79617	-0.0074358	5.73285	-0.0707515	5.76451	-0.0390937
5.62	05_MeOH-MeOH_1.05_dimer.out	5.55465	-0.065357	5.28903	-0.330978	5.42184	-0.198168	5.57398	-0.0460267	5.48471	-0.135294	5.52934	-0.0906602	5.55859	-0.0614178	5.54843	-0.0715771	5.55351	-0.0664974	5.58665	-0.033353	5.61301	-0.00699633	5.59983	-0.0201747	5.54244	-0.0775658	5.61528	-0.00472694	5.57886	-0.0411464	5.69167	0.0716651	5.31335	-0.306654	5.50251	-0.117494	5.63575	0.0157443	5.50491	-0.115089	5.57033	-0.0496725	5.61812	-0.00188593	5.56528	-0.0547222	5.5917	-0.0283041
5.31207	05_MeOH-MeOH_1.10_dimer.out	5.26741	-0.0446679	5.0448	-0.267272	5.1561	-0.15597	5.28124	-0.0308328	5.19955	-0.112528	5.24039	-0.0716803	5.25845	-0.0536193	5.25298	-0.0590912	5.25572	-0.0563552	5.29031	-0.021762	5.301	-0.0110723	5.29566	-0.0164171	5.23455	-0.0775264	5.30905	-0.00302639	5.2718	-0.0402764	5.36014	0.0480689	5.06055	-0.251524	5.21035	-0.101727	5.31791	0.00583348	5.21782	-0.0942517	5.26786	-0.0442091	5.30582	-0.00625487	5.26794	-0.0441376	5.28688	-0.0251962
4.15067	05_MeOH-MeOH_1.25_dimer.out	4.14558	-0.00509214	3.99984	-0.15083	4.07271	-0.0779612	4.1398	-0.0108717	4.07946	-0.0712168	4.10963	-0.0410443	4.12403	-0.0266448	4.11925	-0.0314202	4.12164	-0.0290325	4.13601	-0.014661	4.13166	-0.0190194	4.13383	-0.0168402	4.10748	-0.0431936	4.16101	0.0103337	4.13424	-0.01643	4.20049	0.0498197	4.01407	-0.136609	4.10728	-0.0433947	4.15762	0.00694826	4.09271	-0.0579665	4.12517	-0.0255091	4.14753	-0.00314458	4.12659	-0.0240846	4.13706	-0.0136146
2.5284	05_MeOH-MeOH_1.50_dimer.out	2.53478	0.00638801	2.47188	-0.0565186	2.50333	-0.0250653	2.5253	-0.00309882	2.49783	-0.0305689	2.51156	-0.0168339	2.51607	-0.0123206	2.515	-0.0133937	2.51554	-0.0128572	2.51908	-0.00931871	2.51484	-0.0135553	2.51696	-0.011437	2.5064	-0.021996	2.53302	0.00462618	2.51971	-0.00868492	2.54903	0.0206311	2.47072	-0.0576777	2.50987	-0.0185233	2.53172	0.00332672	2.50308	-0.025313	2.5174	-0.0109931	2.52507	-0.00332844	2.51878	-0.00961608	2.52192	-0.00647226
1.01101	05_MeOH-MeOH_2.00_dimer.out	1.02255	0.011545	1.00278	-0.00822881	1.01267	0.00165809	1.01409	0.00308488	1.00606	-0.00494611	1.01008	-0.000930611	1.00818	-0.00282712	1.00706	-0.00395036	1.00762	-0.00338874	1.00855	-0.00246185	1.00822	-0.00279386	1.00838	-0.00262785	1.00198	-0.00902987	1.0081	-0.00290564	1.00504	-0.00596776	1.02366	0.0126533	1.00359	-0.00742172	1.01362	0.0026158	1.01576	0.00475151	1.00764	-0.00336686	1.0117	0.000692325	1.01042	-0.000586909	1.00947	-0.00154072	1.00995	-0.00106382
7.08127	06_MeOH-MeNH2_0.90_dimer.out	6.82871	-0.25256	6.4086	-0.672675	6.61865	-0.462617	6.92905	-0.152219	6.79345	-0.287819	6.86125	-0.220019	6.97279	-0.108487	6.92373	-0.157545	6.94826	-0.133016	6.99484	-0.0864324	7.04578	-0.0354937	7.02031	-0.060963	7.01867	-0.0626034	7.06041	-0.0208653	7.03954	-0.0417344	7.10956	0.0282833	6.45221	-0.629062	6.78088	-0.300389	7.05715	-0.0241218	6.8298	-0.251471	6.94348	-0.137797	7.04224	-0.0390339	6.94708	-0.134196	6.99466	-0.0866148
7.55441	06_MeOH-MeNH2_0.95_dimer.out	7.34962	-0.204793	7.00367	-0.550741	7.17665	-0.377767	7.42417	-0.130242	7.31019	-0.244224	7.36718	-0.187233	7.46658	-0.0878271	7.42747	-0.12694	7.44703	-0.107383	7.47305	-0.0813636	7.51115	-0.0432609	7.4921	-0.0623123	7.51109	-0.0433264	7.55052	-0.00388744	7.53081	-0.0236069	7.59819	0.0437794	7.03467	-0.519742	7.31643	-0.237981	7.53823	-0.016182	7.34718	-0.207236	7.4427	-0.111709	7.52518	-0.0292302	7.44555	-0.108861	7.48537	-0.0690457
7.60087	06_MeOH-MeNH2_1.00_dimer.out	7.43194	-0.168921	7.1395	-0.461364	7.28572	-0.315143	7.49083	-0.110039	7.39392	-0.206946	7.44237	-0.158492	7.52489	-0.0759722	7.49287	-0.108	7.50888	-0.0919862	7.52943	-0.0714332	7.56072	-0.0401404	7.54508	-0.0557868	7.56063	-0.0402304	7.59668	-0.00418855	7.57866	-0.0222095	7.62854	0.027677	7.16551	-0.435351	7.39703	-0.203837	7.58076	-0.0201038	7.42812	-0.172741	7.50444	-0.0964226	7.57168	-0.0291851	7.50847	-0.0923941	7.54008	-0.0607896
7.37783	06_MeOH-MeNH2_1.05_dimer.out	7.22996	-0.147867	6.98081	-0.397015	7.10539	-0.272441	7.288	-0.0898276	7.20938	-0.168445	7.24869	-0.129137	7.30916	-0.0686707	7.28254	-0.0952897	7.29585	-0.0819802	7.32605	-0.0517747	7.35924	-0.0185877	7.34264	-0.0351812	7.33135	-0.0464734	7.35929	-0.0185361	7.34532	-0.0325047	7.40966	0.0318363	7.01502	-0.362801	7.21234	-0.165482	7.36359	-0.0142337	7.23294	-0.144891	7.29826	-0.0795622	7.35248	-0.0253412	7.29885	-0.0789744	7.32567	-0.0521578
6.99427	06_MeOH-MeNH2_1.10_dimer.out	6.87471	-0.119565	6.66663	-0.32765	6.77067	-0.223607	6.9201	-0.0741718	6.85333	-0.140945	6.88672	-0.107558	6.93517	-0.0591088	6.91315	-0.0811218	6.92416	-0.0701153	6.94986	-0.0444104	6.97574	-0.0185344	6.9628	-0.0314724	6.95097	-0.043305	6.97592	-0.018357	6.96344	-0.030831	6.9843	-0.00997408	6.69324	-0.301036	6.83877	-0.155505	6.97155	-0.0227238	6.87582	-0.11846	6.92368	-0.0705917	6.96599	-0.0282855	6.9273	-0.0669778	6.94664	-0.0476317
5.50482	06_MeOH-MeNH2_1.25_dimer.out	5.45031	-0.0545132	5.31537	-0.189452	5.38284	-0.121983	5.46496	-0.0398624	5.41817	-0.0866487	5.44157	-0.0632555	5.4703	-0.0345279	5.45884	-0.0459862	5.46457	-0.040257	5.47457	-0.0302569	5.48558	-0.0192471	5.48007	-0.024752	5.47589	-0.028931	5.5015	-0.00332391	5.4887	-0.0161275	5.50649	0.0016716	5.32945	-0.175374	5.41797	-0.0868512	5.49704	-0.0077841	5.43534	-0.0694881	5.46619	-0.0386361	5.4901	-0.0147237	5.46856	-0.0362661	5.47933	-0.0254949
3.34489	06_MeOH-MeNH2_1.50_dimer.out	3.32644	-0.0184493	3.26011	-0.0847811	3.29327	-0.0516152	3.32005	-0.0248339	3.29881	-0.0460831	3.30943	-0.0354585	3.32548	-0.0194079	3.32193	-0.0229533	3.32371	-0.0211806	3.31587	-0.0290198	3.32418	-0.0207114	3.32002	-0.0248656	3.33117	-0.013715	3.3462	0.0013141	3.33869	-0.00620043	3.34403	-0.00086168	3.27013	-0.0747606	3.30708	-0.0378112	3.33264	-0.0122509	3.30625	-0.0386398	3.31944	-0.0254454	3.33166	-0.0132332	3.32598	-0.0189058	3.32882	-0.0160695
1.27327	06_MeOH-MeNH2_2.00_dimer.out	1.27976	0.00649748	1.2573	-0.0159654	1.26853	-0.00473395	1.27188	-0.00138705	1.26407	-0.00919358	1.26798	-0.00529031	1.2697	-0.00356422	1.26835	-0.00491964	1.26903	-0.00424193	1.26671	-0.00655642	1.26851	-0.00475375	1.26761	-0.00565508	1.26742	-0.00584847	1.27283	-0.000435518	1.27012	-0.003142	1.28122	0.00795455	1.25854	-0.0147319	1.26988	-0.00338865	1.27379	0.000527802	1.26619	-0.00707257	1.26999	-0.00327238	1.27122	-0.00205193	1.27029	-0.00298064	1.27075	-0.00251628
7.75614	07_MeOH-Peptide_0.90_dimer.out	7.49497	-0.261173	6.97219	-0.783954	7.23358	-0.522563	7.58941	-0.166734	7.42261	-0.333535	7.50601	-0.250135	7.6426	-0.113547	7.57807	-0.178074	7.61033	-0.14581	7.65133	-0.104816	7.71792	-0.0382252	7.68462	-0.0715208	7.6984	-0.0577443	7.74118	-0.0149671	7.71979	-0.0363557	7.74918	-0.00696184	7.05444	-0.701702	7.40181	-0.354332	7.71751	-0.0386293	7.47863	-0.277516	7.59807	-0.158072	7.71512	-0.0410258	7.61354	-0.142607	7.66433	-0.0918164
8.23517	07_MeOH-Peptide_0.95_dimer.out	8.01054	-0.224632	7.57046	-0.664713	7.7905	-0.444672	8.09345	-0.141726	7.95275	-0.282416	8.0231	-0.212071	8.13963	-0.0955385	8.08642	-0.148751	8.11303	-0.122145	8.1478	-0.08737	8.2034	-0.0317699	8.1756	-0.05957	8.18809	-0.0470795	8.22666	-0.00851247	8.20738	-0.027796	8.23244	-0.0027306	7.63559	-0.599581	7.93402	-0.301156	8.20765	-0.0275219	8.00394	-0.231228	8.1058	-0.129375	8.20317	-0.0319969	8.11752	-0.117652	8.16035	-0.0748244
8.28898	07_MeOH-Peptide_1.00_dimer.out	8.10474	-0.18424	7.727	-0.561981	7.91587	-0.37311	8.17661	-0.112372	8.05539	-0.233584	8.116	-0.172978	8.2105	-0.0784734	8.16778	-0.121201	8.18914	-0.099837	8.22372	-0.0652529	8.2707	-0.0182764	8.24721	-0.0417647	8.24607	-0.0429076	8.28569	-0.00328968	8.26588	-0.0230986	8.29824	0.00926204	7.78491	-0.504072	8.04157	-0.247405	8.27255	-0.0164295	8.09742	-0.191562	8.18498	-0.103996	8.26718	-0.0217968	8.19467	-0.0943055	8.23093	-0.0580511
8.07188	07_MeOH-Peptide_1.05_dimer.out	7.89882	-0.173063	7.59711	-0.474774	7.74797	-0.323919	7.97416	-0.0977247	7.87796	-0.193928	7.92606	-0.145826	8.0044	-0.0674802	7.97667	-0.0952161	7.99054	-0.0813481	8.02355	-0.0483303	8.06209	-0.00979571	8.04282	-0.029063	8.03614	-0.0357481	8.08024	0.00835052	8.05819	-0.0136988	8.08464	0.0127552	7.64662	-0.425267	7.86563	-0.206256	8.06822	-0.00366723	7.91671	-0.155177	7.99246	-0.079422	8.0614	-0.0104835	7.99975	-0.07213	8.03058	-0.0413067
7.69153	07_MeOH-Peptide_1.10_dimer.out	7.55727	-0.134255	7.29713	-0.3944	7.4272	-0.264328	7.61566	-0.0758655	7.53154	-0.159989	7.5736	-0.117927	7.64207	-0.049451	7.61744	-0.074087	7.62976	-0.061769	7.65394	-0.0375833	7.68522	-0.00630114	7.66958	-0.0219422	7.66979	-0.0217375	7.70756	0.0160396	7.68868	-0.00284895	7.70673	0.0152024	7.34058	-0.35095	7.52365	-0.167874	7.6897	-0.00182718	7.56592	-0.125601	7.62781	-0.0637141	7.68695	-0.00457155	7.63781	-0.0537118	7.66238	-0.0291417
6.18753	07_MeOH-Peptide_1.25_dimer.out	6.13102	-0.0565105	5.94951	-0.238018	6.04027	-0.147264	6.14444	-0.043091	6.08769	-0.0998422	6.11606	-0.0714666	6.15837	-0.0291655	6.14356	-0.0439684	6.15096	-0.036567	6.15324	-0.0342926	6.17828	-0.00924913	6.16576	-0.0217709	6.17298	-0.0145552	6.20218	0.0146532	6.18758	4.89984e-05	6.19922	0.0116864	5.97524	-0.212294	6.08723	-0.100304	6.18219	-0.00534232	6.10934	-0.0781945	6.14576	-0.0417684	6.18301	-0.00451693	6.15678	-0.0307468	6.1699	-0.0176319
3.64659	07_MeOH-Peptide_1.50_dimer.out	3.61822	-0.0283717	3.54043	-0.106165	3.57933	-0.0672681	3.62327	-0.0233266	3.59288	-0.0537108	3.60808	-0.0385187	3.624	-0.0225956	3.62146	-0.025137	3.62273	-0.0238663	3.62658	-0.0200189	3.62727	-0.0193203	3.62693	-0.0196696	3.62477	-0.0218287	3.65144	0.00484205	3.6381	-0.00849332	3.64375	-0.00284834	3.54793	-0.0986598	3.59584	-0.0507541	3.64004	-0.00655911	3.60659	-0.0400092	3.62331	-0.0232842	3.63827	-0.00832604	3.62949	-0.0171049	3.63388	-0.0127155
1.09751	07_MeOH-Peptide_2.00_dimer.out	1.09667	-0.000841361	1.08171	-0.0158037	1.08919	-0.00832252	1.09644	-0.00106936	1.08857	-0.00893711	1.09251	-0.00500324	1.08971	-0.00779458	1.08863	-0.00887389	1.08917	-0.00833424	1.09629	-0.00121885	1.09307	-0.00443514	1.09468	-0.00282699	1.08266	-0.0148505	1.0887	-0.00880757	1.08568	-0.0118291	1.09929	0.00177693	1.08184	-0.0156681	1.09056	-0.00694558	1.09654	-0.000970442	1.08997	-0.0075374	1.09325	-0.00425392	1.09188	-0.00562967	1.09092	-0.00658976	1.0914	-0.00610972
4.67513	08_MeOH-Water_0.90_dimer.out	4.56155	-0.113584	4.22148	-0.453658	4.39151	-0.283621	4.60501	-0.0701213	4.48663	-0.188503	4.54582	-0.129312	4.59568	-0.0794544	4.56924	-0.105891	4.58246	-0.0926729	4.63351	-0.0416254	4.66048	-0.0146578	4.64699	-0.0281416	4.58589	-0.0892464	4.65592	-0.0192172	4.6209	-0.0542318	4.7215	0.0463629	4.23243	-0.442704	4.47696	-0.198171	4.68262	0.00748195	4.50152	-0.173611	4.59207	-0.0830645	4.6635	-0.0116331	4.58862	-0.0865138	4.62606	-0.0490735
5.01703	08_MeOH-Water_0.95_dimer.out	4.94072	-0.0763135	4.64958	-0.367453	4.79515	-0.221883	4.95587	-0.0611567	4.8584	-0.158626	4.90714	-0.109891	4.95051	-0.0665183	4.93298	-0.0840446	4.94175	-0.0752815	4.96581	-0.0512194	4.99532	-0.0217119	4.98056	-0.0364656	4.94489	-0.0721435	5.01123	-0.00579513	4.97806	-0.0389693	5.07527	0.0582432	4.65466	-0.362372	4.86496	-0.152065	5.02915	0.0121195	4.87667	-0.140357	4.95291	-0.0641188	5.01103	-0.00600126	4.94887	-0.0681561	4.97995	-0.0370787
5.04458	08_MeOH-Water_1.00_dimer.out	4.99745	-0.0471349	4.76008	-0.284499	4.87876	-0.165817	4.99572	-0.0488639	4.91283	-0.131753	4.95427	-0.0903086	4.98725	-0.0573307	4.97798	-0.0665991	4.98262	-0.0619649	4.99458	-0.0499975	5.01297	-0.0316077	5.00378	-0.0408026	4.97837	-0.066214	5.04634	0.00175945	5.01235	-0.0322273	5.10982	0.065243	4.74876	-0.295817	4.92929	-0.115287	5.05897	0.0143912	4.93014	-0.11444	4.99456	-0.0500245	5.04132	-0.00326453	4.99034	-0.0542434	5.01583	-0.028754
4.88113	08_MeOH-Water_1.05_dimer.out	4.83836	-0.0427747	4.63646	-0.244671	4.73741	-0.143723	4.84271	-0.0384261	4.7726	-0.108535	4.80765	-0.0734806	4.82876	-0.0523705	4.82734	-0.0537887	4.82805	-0.0530796	4.84556	-0.035575	4.86185	-0.01928	4.8537	-0.0274275	4.81413	-0.0670007	4.88478	0.00365024	4.84946	-0.0316752	4.93389	0.052754	4.64105	-0.240078	4.78747	-0.0936621	4.88786	0.00672653	4.78801	-0.0931183	4.83794	-0.0431959	4.87322	-0.00791143	4.83697	-0.0441627	4.85509	-0.026037
4.60958	08_MeOH-Water_1.10_dimer.out	4.58692	-0.022654	4.40803	-0.201544	4.49748	-0.112099	4.58184	-0.0277381	4.51857	-0.0910045	4.55021	-0.0593713	4.56186	-0.047715	4.56585	-0.0437303	4.56385	-0.0457226	4.57851	-0.0310714	4.59105	-0.0185311	4.58478	-0.0248013	4.5409	-0.0686744	4.61545	0.00586888	4.57817	-0.0314027	4.66859	0.0590088	4.41547	-0.194108	4.54203	-0.0675496	4.61906	0.00947982	4.53336	-0.0762154	4.57621	-0.0333678	4.60414	-0.0054334	4.57469	-0.0348824	4.58942	-0.0201579
3.59767	08_MeOH-Water_1.25_dimer.out	3.6169	0.0192337	3.49208	-0.105586	3.55449	-0.043176	3.58514	-0.0125268	3.54294	-0.0547231	3.56404	-0.0336249	3.55883	-0.0388358	3.57502	-0.0226523	3.56692	-0.030744	3.56432	-0.03335	3.57629	-0.0213758	3.57031	-0.0273629	3.53123	-0.0664387	3.60866	0.0109958	3.56995	-0.0277214	3.66273	0.0650667	3.49863	-0.0990424	3.58068	-0.0169879	3.60683	0.00916679	3.55223	-0.0454372	3.57953	-0.0181352	3.5944	-0.00326852	3.57954	-0.0181279	3.58697	-0.0106982
2.20477	08_MeOH-Water_1.50_dimer.out	2.22574	0.0209703	2.16444	-0.0403276	2.19509	-0.00967865	2.19685	-0.0079191	2.18031	-0.024459	2.18858	-0.016189	2.16741	-0.0373545	2.16311	-0.0416592	2.16526	-0.0395068	2.17791	-0.02686	2.19071	-0.014055	2.18431	-0.0204575	2.13653	-0.0682375	2.14506	-0.0597053	2.14079	-0.0639714	2.24886	0.0440939	2.17404	-0.0307236	2.21145	0.0066851	2.20836	0.00359489	2.18436	-0.0204074	2.19636	-0.00840624	2.19816	-0.0066065	2.19163	-0.0131389	2.19489	-0.00987269
0.909327	08_MeOH-Water_2.00_dimer.out	0.940683	0.0313568	0.907249	-0.00207801	0.923966	0.0146394	0.914038	0.00471116	0.905866	-0.00346042	0.909952	0.00062537	0.909424	9.77949e-05	0.908082	-0.00124508	0.908753	-0.00057364	0.896568	-0.0127586	0.90496	-0.00436678	0.900764	-0.00856271	0.904584	-0.00474246	0.910406	0.00107922	0.907495	-0.00183162	0.940502	0.0311756	0.907592	-0.00173466	0.924047	0.0147205	0.914893	0.00556592	0.906841	-0.0024861	0.910867	0.00153991	0.910554	0.00122731	0.909155	-0.000172034	0.909854	0.000527639
2.83742	09_MeNH2-MeOH_0.90_dimer.out	2.72314	-0.114275	2.44356	-0.393854	2.58335	-0.254065	2.78385	-0.0535646	2.69919	-0.138229	2.74152	-0.0958967	2.78445	-0.0529701	2.77082	-0.0665996	2.77763	-0.0597849	2.82366	-0.0137606	2.86679	0.029368	2.84522	0.00780374	2.78507	-0.0523464	2.84597	0.00855223	2.81552	-0.0218971	2.93091	0.0934951	2.49417	-0.343249	2.71254	-0.124877	2.85584	0.0184238	2.71118	-0.126235	2.78351	-0.0539058	2.84252	0.00509959	2.78428	-0.0531396	2.8134	-0.02402
3.05113	09_MeNH2-MeOH_0.95_dimer.out	2.9812	-0.0699228	2.74845	-0.302673	2.86483	-0.186298	3.016	-0.0351205	2.94323	-0.107891	2.97962	-0.0715055	3.01109	-0.0400336	3.00093	-0.0501992	3.00601	-0.0451164	3.03882	-0.0123029	3.07094	0.0198154	3.05488	0.00375625	3.00594	-0.0451883	3.06145	0.0103294	3.0337	-0.0174295	3.13392	0.0827963	2.78658	-0.26455	2.96025	-0.0908769	3.06632	0.0151961	2.95271	-0.098411	3.00952	-0.0416074	3.05631	0.00518475	3.01239	-0.0387346	3.03435	-0.0167749
3.03663	09_MeNH2-MeOH_1.00_dimer.out	2.99567	-0.0409581	2.80324	-0.233382	2.89946	-0.13717	3.00994	-0.0266875	2.94814	-0.0884867	2.97904	-0.0575871	3.00593	-0.0306931	2.99834	-0.038286	3.00214	-0.0344896	3.0193	-0.0173312	3.04314	0.00651168	3.03122	-0.00540978	3.00173	-0.0348958	3.05101	0.0143836	3.02637	-0.0102561	3.09721	0.0605786	2.82747	-0.209155	2.96234	-0.0742884	3.04412	0.00748841	2.95726	-0.0793684	3.00069	-0.03594	3.04018	0.00355005	3.00831	-0.0283149	3.02424	-0.0123824
2.89242	09_MeNH2-MeOH_1.05_dimer.out	2.86254	-0.029886	2.70769	-0.184728	2.78511	-0.107307	2.87206	-0.0203609	2.81823	-0.0741909	2.84515	-0.0472759	2.86685	-0.0255749	2.8593	-0.0331175	2.86307	-0.0293462	2.87831	-0.0141159	2.8907	-0.00171886	2.8845	-0.00791737	2.86138	-0.0310453	2.9024	0.00997585	2.88189	-0.0105347	2.93605	0.0436277	2.7254	-0.167017	2.83073	-0.0616946	2.89389	0.00146842	2.82612	-0.066302	2.86	-0.0324168	2.8918	-0.000625076	2.86857	-0.0238555	2.88018	-0.0122403
2.6818	09_MeNH2-MeOH_1.10_dimer.out	2.65929	-0.0225085	2.53146	-0.150334	2.59537	-0.0864213	2.66313	-0.0186626	2.61628	-0.0655162	2.63971	-0.0420894	2.66107	-0.020722	2.65386	-0.0279384	2.65747	-0.0243302	2.66565	-0.016141	2.67189	-0.00990664	2.66877	-0.0130238	2.65891	-0.0228827	2.69328	0.0114875	2.6761	-0.0056976	2.71856	0.0367612	2.54704	-0.134755	2.6328	-0.048997	2.68253	0.00073625	2.62632	-0.0554737	2.65443	-0.0273687	2.67907	-0.00272503	2.66028	-0.0215127	2.66968	-0.0121188
1.97082	09_MeNH2-MeOH_1.25_dimer.out	1.95593	-0.014893	1.89211	-0.0787172	1.92402	-0.0468051	1.95762	-0.013199	1.93427	-0.03655	1.94595	-0.0248745	1.95383	-0.0169914	1.95327	-0.0175499	1.95355	-0.0172706	1.95874	-0.0120883	1.96192	-0.00890378	1.96033	-0.0104961	1.94985	-0.0209702	1.97321	0.00238477	1.96153	-0.00929274	1.97984	0.0090177	1.90037	-0.0704578	1.9401	-0.03072	1.96617	-0.00464954	1.93721	-0.0336118	1.95169	-0.0191307	1.96407	-0.00675041	1.95763	-0.0131949	1.96085	-0.00997268
1.09813	09_MeNH2-MeOH_1.50_dimer.out	1.10858	0.0104526	1.07347	-0.0246614	1.09102	-0.00710436	1.09732	-0.000802365	1.08758	-0.0105422	1.09245	-0.00567229	1.08958	-0.00855058	1.08853	-0.00959852	1.08905	-0.00907455	1.08995	-0.00818153	1.09684	-0.00128523	1.09339	-0.00473338	1.08145	-0.0166798	1.08952	-0.00860841	1.08548	-0.0126441	1.11219	0.0140627	1.07722	-0.0209049	1.09471	-0.00342107	1.09969	0.0015625	1.08748	-0.0106427	1.09359	-0.00454008	1.09594	-0.00218763	1.0933	-0.00482945	1.09462	-0.00350854
0.393125	09_MeNH2-MeOH_2.00_dimer.out	0.401484	0.00835876	0.389997	-0.00312873	0.39574	0.00261501	0.395224	0.00209875	0.390638	-0.00248777	0.392931	-0.000194508	0.390524	-0.00260122	0.390116	-0.0030091	0.39032	-0.00280516	0.39112	-0.00200553	0.391058	-0.00206753	0.391089	-0.00203653	0.385593	-0.00753233	0.389569	-0.00355607	0.387581	-0.0055442	0.402425	0.00929987	0.391119	-0.00200643	0.396772	0.00364672	0.394962	0.00183687	0.390374	-0.00275126	0.392668	-0.000457195	0.391936	-0.00118932	0.391553	-0.0015721	0.391745	-0.00138071
3.72176	10_MeNH2-MeNH2_0.90_dimer.out	3.51109	-0.210667	3.21657	-0.505182	3.36383	-0.357925	3.62752	-0.0942313	3.53504	-0.186711	3.58128	-0.140471	3.66575	-0.0560022	3.62788	-0.0938724	3.64682	-0.0749373	3.70386	-0.0178919	3.74385	0.0220897	3.72385	0.00209889	3.70586	-0.0158929	3.72529	0.00353207	3.71558	-0.00618043	3.70591	-0.0158424	3.26767	-0.454081	3.48679	-0.234962	3.71077	-0.0109826	3.55654	-0.165221	3.63365	-0.0881016	3.70874	-0.0130115	3.64793	-0.0738235	3.67834	-0.0434175
4.10425	10_MeNH2-MeNH2_0.95_dimer.out	3.89941	-0.204843	3.68615	-0.418099	3.79278	-0.311471	4.01456	-0.0896881	3.95519	-0.149055	3.98488	-0.119372	4.05431	-0.0499362	4.02948	-0.0747668	4.0419	-0.0623515	4.09006	-0.0141885	4.13159	0.0273388	4.11083	0.00657515	4.09602	-0.00822939	4.10743	0.0031753	4.10172	-0.00252704	4.09427	-0.00997819	3.73527	-0.368983	3.91477	-0.189481	4.0987	-0.0055522	3.97092	-0.133328	4.03481	-0.0694402	4.09692	-0.00733461	4.04746	-0.0567886	4.07219	-0.0320616
4.1526	10_MeNH2-MeNH2_1.00_dimer.out	3.99036	-0.162248	3.82473	-0.327876	3.90754	-0.245062	4.08409	-0.0685192	4.03396	-0.118644	4.05902	-0.0935818	4.11437	-0.0382317	4.09463	-0.0579732	4.1045	-0.0481025	4.14554	-0.00706709	4.17114	0.0185349	4.15834	0.00573389	4.14615	-0.00645472	4.15829	0.00568183	4.15222	-0.000386448	4.13776	-0.0148463	3.85382	-0.298787	3.99579	-0.156817	4.14857	-0.00403316	4.04564	-0.106963	4.09711	-0.0554983	4.14837	-0.00423327	4.10978	-0.0428251	4.12908	-0.0235292
4.00192	10_MeNH2-MeNH2_1.05_dimer.out	3.86125	-0.14067	3.72818	-0.273737	3.79471	-0.207204	3.94702	-0.0548953	3.90504	-0.0968801	3.92603	-0.0758877	3.96911	-0.0328051	3.95291	-0.0490011	3.96101	-0.0409031	4.00326	0.00134175	4.02099	0.0190733	4.01212	0.0102075	3.99229	-0.00962853	4.00315	0.00123253	3.99772	-0.004198	3.9857	-0.0162172	3.75768	-0.244233	3.87169	-0.130225	4.00017	-0.00174074	3.91653	-0.0853828	3.95835	-0.0435618	3.99814	-0.00377652	3.96737	-0.0345496	3.98275	-0.0191631
3.74167	10_MeNH2-MeNH2_1.10_dimer.out	3.62999	-0.111686	3.51902	-0.222657	3.5745	-0.167171	3.69526	-0.0464093	3.66003	-0.0816394	3.67765	-0.0640244	3.71321	-0.0284669	3.70008	-0.0415881	3.70665	-0.0350275	3.73806	-0.00361182	3.75249	0.0108163	3.74527	0.00360222	3.73203	-0.00964199	3.74211	0.000432982	3.73707	-0.0046045	3.72976	-0.0119097	3.54044	-0.20123	3.6351	-0.10657	3.73857	-0.00309951	3.66858	-0.0730915	3.70358	-0.0380955	3.73808	-0.0035924	3.71292	-0.0287493	3.7255	-0.0161708
2.78069	10_MeNH2-MeNH2_1.25_dimer.out	2.71244	-0.0682483	2.65344	-0.127243	2.68294	-0.0977455	2.74428	-0.0364036	2.732	-0.0486811	2.73814	-0.0425424	2.7593	-0.0213823	2.75549	-0.0251976	2.7574	-0.0232899	2.76516	-0.0155251	2.78351	0.00282654	2.77434	-0.00634929	2.77506	-0.00562227	2.78013	-0.000559102	2.7776	-0.00309069	2.74972	-0.0309681	2.66837	-0.112316	2.70904	-0.0716421	2.76511	-0.0155712	2.73642	-0.0442651	2.75077	-0.0299182	2.77294	-0.00774653	2.7633	-0.0173851	2.76812	-0.0125658
1.30176	10_MeNH2-MeNH2_1.50_dimer.out	1.29357	-0.00818987	1.26654	-0.0352156	1.28005	-0.0217028	1.29039	-0.0113662	1.28235	-0.0194015	1.28637	-0.0153839	1.28986	-0.0118973	1.28769	-0.0140622	1.28878	-0.0129797	1.28831	-0.0134488	1.29272	-0.00903324	1.29051	-0.011241	1.2893	-0.0124544	1.2933	-0.00846028	1.2913	-0.0104574	1.29906	-0.00269238	1.26642	-0.0353402	1.28274	-0.0190163	1.29484	-0.00691661	1.28403	-0.0177257	1.28943	-0.0123212	1.29479	-0.00696506	1.29251	-0.0092492	1.29365	-0.00810713
0.385362	10_MeNH2-MeNH2_2.00_dimer.out	0.388869	0.00350692	0.38175	-0.0036122	0.385309	-5.26402e-05	0.385515	0.000153181	0.382403	-0.00295915	0.383959	-0.00140298	0.385115	-0.000246979	0.384795	-0.000567009	0.384955	-0.000406994	0.383316	-0.00204564	0.382831	-0.00253099	0.383074	-0.00228831	0.384695	-0.000666819	0.387305	0.00194278	0.386	0.000637978	0.389909	0.00454702	0.382739	-0.00262312	0.386324	0.000961947	0.387221	0.00185859	0.384131	-0.00123066	0.385676	0.000313961	0.385617	0.000255029	0.385303	-5.87261e-05	0.38546	9.81512e-05
4.95826	11_MeNH2-Peptide_0.90_dimer.out	4.71213	-0.246129	4.34136	-0.616902	4.52675	-0.431515	4.82068	-0.137583	4.70942	-0.248846	4.76505	-0.193214	4.87843	-0.0798268	4.83415	-0.12411	4.85629	-0.101968	4.89185	-0.0664161	4.95073	-0.00753534	4.92129	-0.0369757	4.93903	-0.0192305	4.96502	0.00676008	4.95203	-0.0062352	5.01405	0.0557916	4.41217	-0.546095	4.71311	-0.245152	4.97233	0.0140678	4.75022	-0.208045	4.86127	-0.0969885	4.95337	-0.00488957	4.86526	-0.0929982	4.90932	-0.0489439
5.35424	11_MeNH2-Peptide_0.95_dimer.out	5.14428	-0.209957	4.83612	-0.518114	4.9902	-0.364036	5.23577	-0.118469	5.1529	-0.20134	5.19433	-0.159905	5.28531	-0.0689299	5.25195	-0.102282	5.26863	-0.085606	5.29575	-0.0584862	5.36058	0.00634782	5.32817	-0.0260692	5.33728	-0.0169545	5.35588	0.00164763	5.34658	-0.00765342	5.41544	0.0612045	4.90572	-0.448518	5.16058	-0.193657	5.36907	0.0148377	5.18418	-0.170056	5.27663	-0.0776093	5.35087	-0.00336773	5.27924	-0.0749979	5.31505	-0.0391828
5.39666	11_MeNH2-Peptide_1.00_dimer.out	5.23539	-0.161271	4.96827	-0.428397	5.10183	-0.294834	5.29753	-0.0991299	5.22753	-0.169137	5.26253	-0.134134	5.33661	-0.0600523	5.30965	-0.0870101	5.32313	-0.0735312	5.33827	-0.0583882	5.3975	0.000841999	5.36789	-0.0287731	5.37761	-0.0190528	5.39582	-0.00084386	5.38671	-0.00994834	5.46797	0.0713072	5.0262	-0.370463	5.24709	-0.149578	5.41353	0.0168711	5.25456	-0.1421	5.33405	-0.0626147	5.3954	-0.00126721	5.3342	-0.0624619	5.3648	-0.0318646
5.22226	11_MeNH2-Peptide_1.05_dimer.out	5.08587	-0.136397	4.86585	-0.356417	4.97586	-0.246407	5.13373	-0.0885382	5.0852	-0.137067	5.10946	-0.112802	5.17073	-0.0515354	5.15318	-0.0690869	5.16195	-0.0603112	5.1651	-0.0571603	5.22901	0.00674691	5.19706	-0.0252067	5.20955	-0.0127129	5.2245	0.00223602	5.21703	-0.00523843	5.28028	0.0580154	4.91543	-0.306833	5.09786	-0.124409	5.23455	0.0122867	5.10453	-0.117731	5.16954	-0.0527223	5.22237	0.000102323	5.17212	-0.0501424	5.19724	-0.02502
4.92339	11_MeNH2-Peptide_1.10_dimer.out	4.82183	-0.101564	4.63331	-0.290081	4.72757	-0.195822	4.85088	-0.072505	4.80843	-0.114964	4.82965	-0.0937344	4.88049	-0.0429022	4.86609	-0.0573036	4.87329	-0.0501029	4.86994	-0.0534532	4.92324	-0.000151004	4.89659	-0.0268021	4.91155	-0.0118436	4.92658	0.00319229	4.91906	-0.00432564	4.99018	0.0667933	4.67335	-0.25004	4.83177	-0.0916234	4.93804	0.0146477	4.82631	-0.0970828	4.88217	-0.0412176	4.92475	0.00136229	4.88174	-0.0416472	4.90325	-0.0201425
3.19683	11_MeNH2-Peptide_1.25_dimer.out	3.15362	-0.0432103	3.06183	-0.134997	3.10773	-0.0891038	3.15922	-0.037614	3.14314	-0.0536874	3.15118	-0.0456507	3.16757	-0.0292619	3.16408	-0.0327446	3.16583	-0.0310032	3.16288	-0.0339448	3.19645	-0.000377811	3.17967	-0.0171613	3.17633	-0.0204991	3.18606	-0.0107718	3.18119	-0.0156354	3.20948	0.0126485	3.07623	-0.120602	3.14285	-0.0539767	3.18775	-0.00908112	3.14947	-0.0473564	3.16861	-0.0282188	3.18773	-0.0091	3.17455	-0.022284	3.18114	-0.015692
1.39662	11_MeNH2-Peptide_1.50_dimer.out	1.39017	-0.00644825	1.35497	-0.0416494	1.37257	-0.0240488	1.38463	-0.0119825	1.37589	-0.0207266	1.38026	-0.0163546	1.38387	-0.0127512	1.38254	-0.0140815	1.3832	-0.0134163	1.38101	-0.015611	1.38961	-0.00700884	1.38531	-0.0113099	1.38306	-0.0135576	1.38951	-0.00710956	1.38628	-0.0103336	1.39803	0.00140898	1.35932	-0.0372994	1.37867	-0.0179452	1.38898	-0.00763931	1.37935	-0.0172661	1.38416	-0.0124527	1.39026	-0.00635683	1.38796	-0.00865351	1.38911	-0.00750517
[truncated: 442 more rows]
[truncated: 48 more columns]
