# Supplementary material for: S66x8 noncovalent interactions revisited: new benchmark and performance of composite localized coupled-cluster methods
Source: Royal Society of Chemistry journal article supplement (doi:10.1039/d2cp03938a), 2022-01-01
Supplement: d2cp03938a1.zip [file revDSD-PBEP86 and wB97M2.xlsx]

## Sheet: revDSD-PBEP86-D3BJ haVQZ
																		MSD	-0.164681	-0.0194837	-0.0920823		-0.179509	-0.0343113	-0.10691		-0.23348	-0.0882829	-0.160881
																		RMSD	0.259047	0.148788	0.189293		0.271713	0.144676	0.196443		0.337118	0.186126	0.255648
/work/comartin/S66x8/ORCA/revDSD-PBEP86-D4-haVQZ																			cp	raw	half		cp	raw	half		cp	raw	half
																		H bonds	0.292685	0.153059	0.218797		0.281367	0.15112	0.210544		0.346045	0.2029	0.271633
																		pi stack	0.244655	0.192698	0.164105		0.298618	0.15205	0.185963		0.387321	0.167555	0.259773
																		London	0.331305	0.169351	0.247425		0.35592	0.188158	0.270257		0.427763	0.256197	0.341037
																		mixed	0.147173	0.0943701	0.0996729		0.160195	0.0907652	0.107714		0.208288	0.10137	0.146567
															REF S66x8				errors w.r.t. rev2022				errors w.r.t. Opus 279				errors w.r.t. Opus 268
															S66x8rev2022	BRONZE
											cp	raw	half		Golokesh,Semidalas,Mehta,Karton,Martin	Opus279	Opus268		cp	raw	half		cp	raw	half		cp	raw	half
01_Water-Water_0.90_dimer.out	-152.736	01_Water-Water_0.90_cpA.out	-76.3642	01_Water-Water_0.90_cpB.out	-76.3641	01_Water-Water_1.00_monomerA.out	-76.364	01_Water-Water_1.00_monomerB.out	-76.364		4.58533	4.7192	4.65226		4.666	4.61	4.65882		-0.0806724	0.0531979	-0.0137373		-0.0246724	0.109198	0.0422627		-0.0734914	0.0603789	-0.00655628			revDSD-PBEP86-D3BJ/haVQZ
01_Water-Water_0.95_dimer.out	-152.736	01_Water-Water_0.95_cpA.out	-76.3641	01_Water-Water_0.95_cpB.out	-76.3641	01_Water-Water_1.00_monomerA.out	-76.364	01_Water-Water_1.00_monomerB.out	-76.364		4.89716	5.01002	4.95359		4.954	4.912	4.95377		-0.0568375	0.0560242	-0.000406646		-0.0148375	0.0980242	0.0415934		-0.0566098	0.056252	-0.000178902		REF		raw	cp	half
01_Water-Water_1.00_dimer.out	-152.736	01_Water-Water_1.00_cpA.out	-76.3641	01_Water-Water_1.00_cpB.out	-76.364	01_Water-Water_1.00_monomerA.out	-76.364	01_Water-Water_1.00_monomerB.out	-76.364		4.90805	5.0041	4.95607		4.946	4.915	4.95065		-0.0379538	0.0581017	0.010074		-0.00695379	0.0891017	0.041074		-0.0426057	0.0534498	0.00542204		Sterling Silver	RMSD	0.148788	0.259047	0.189293
01_Water-Water_1.05_dimer.out	-152.736	01_Water-Water_1.05_cpA.out	-76.3641	01_Water-Water_1.05_cpB.out	-76.364	01_Water-Water_1.00_monomerA.out	-76.364	01_Water-Water_1.00_monomerB.out	-76.364		4.73728	4.81939	4.77833		4.762	4.739	4.76839		-0.0247205	0.0573872	0.0163334		-0.00172054	0.0803872	0.0393334		-0.0311068	0.051001	0.00994708		Golokesh,Semidalas,Mehta,Karton,Martin	H bonds	0.153059	0.292685	0.218797
01_Water-Water_1.10_dimer.out	-152.735	01_Water-Water_1.10_cpA.out	-76.3641	01_Water-Water_1.10_cpB.out	-76.364	01_Water-Water_1.00_monomerA.out	-76.364	01_Water-Water_1.00_monomerB.out	-76.364		4.46441	4.5346	4.4995		4.48	4.462	4.48656		-0.0155892	0.0545967	0.0195038		0.00241085	0.0725967	0.0375038		-0.022152	0.0480338	0.0129409			pi stack	0.192698	0.244655	0.164105
01_Water-Water_1.25_dimer.out	-152.734	01_Water-Water_1.25_cpA.out	-76.3641	01_Water-Water_1.25_cpB.out	-76.364	01_Water-Water_1.00_monomerA.out	-76.364	01_Water-Water_1.00_monomerB.out	-76.364		3.46571	3.51047	3.48809		3.47	3.46	3.47347		-0.00428787	0.0404711	0.0180916		0.00571213	0.0504711	0.0280916		-0.00775352	0.0370055	0.014626			London	0.169351	0.331305	0.247425
01_Water-Water_1.50_dimer.out	-152.731	01_Water-Water_1.50_cpA.out	-76.364	01_Water-Water_1.50_cpB.out	-76.364	01_Water-Water_1.00_monomerA.out	-76.364	01_Water-Water_1.00_monomerB.out	-76.364		2.10571	2.13077	2.11824		2.117	2.108	2.11314		-0.0112917	0.0137704	0.00123934		-0.0022917	0.0227704	0.0102393		-0.00742957	0.0176325	0.00510148			mixed	0.0943701	0.147173	0.0996729
01_Water-Water_2.00_dimer.out	-152.729	01_Water-Water_2.00_cpA.out	-76.364	01_Water-Water_2.00_cpB.out	-76.364	01_Water-Water_1.00_monomerA.out	-76.364	01_Water-Water_1.00_monomerB.out	-76.364		0.86505	0.874062	0.869556		0.874	0.871	0.871683		-0.0089502	6.24335e-05	-0.00444388		-0.0059502	0.00306243	-0.00144388		-0.00663353	0.0023791	-0.00212722		Opus279	RMSD	0.144676	0.271713	0.196443
02_Water-MeOH_0.90_dimer.out	-191.973	02_Water-MeOH_0.90_cpA.out	-115.6	02_Water-MeOH_0.90_cpB.out	-76.3641	02_Water-MeOH_1.00_monomerA.out	-76.364	02_Water-MeOH_1.00_monomerB.out	-115.6		5.12102	5.28505	5.20304		5.298	5.232	5.29278		-0.176984	-0.0129455	-0.0949646		-0.110984	0.0530545	-0.0289646		-0.171768	-0.00773002	-0.0897491			H bonds	0.15112	0.281367	0.210544
02_Water-MeOH_0.95_dimer.out	-191.973	02_Water-MeOH_0.95_cpA.out	-115.6	02_Water-MeOH_0.95_cpB.out	-76.3641	02_Water-MeOH_1.00_monomerA.out	-76.364	02_Water-MeOH_1.00_monomerB.out	-115.6		5.4871	5.62634	5.55672		5.629	5.578	5.63046		-0.141903	-0.00265972	-0.0722813		-0.0909028	0.0483403	-0.0212813		-0.143365	-0.00412151	-0.0737431			pi stack	0.15205	0.298618	0.185963
02_Water-MeOH_1.00_dimer.out	-191.973	02_Water-MeOH_1.00_cpA.out	-115.6	02_Water-MeOH_1.00_cpB.out	-76.3641	02_Water-MeOH_1.00_monomerA.out	-76.364	02_Water-MeOH_1.00_monomerB.out	-115.6		5.51415	5.63333	5.57374		5.627	5.589	5.63423		-0.112851	0.00632891	-0.0532611		-0.0748511	0.0443289	-0.0152611		-0.120078	-0.000898035	-0.060488			London	0.188158	0.35592	0.270257
02_Water-MeOH_1.05_dimer.out	-191.973	02_Water-MeOH_1.05_cpA.out	-115.6	02_Water-MeOH_1.05_cpB.out	-76.3641	02_Water-MeOH_1.00_monomerA.out	-76.364	02_Water-MeOH_1.00_monomerB.out	-115.6		5.33379	5.43632	5.38505		5.423	5.396	5.43386		-0.0892127	0.0133154	-0.0379486		-0.0622127	0.0403154	-0.0109486		-0.100076	0.00245177	-0.0488123			mixed	0.0907652	0.160195	0.107714
02_Water-MeOH_1.10_dimer.out	-191.972	02_Water-MeOH_1.10_cpA.out	-115.6	02_Water-MeOH_1.10_cpB.out	-76.364	02_Water-MeOH_1.00_monomerA.out	-76.364	02_Water-MeOH_1.00_monomerB.out	-115.6		5.0345	5.12279	5.07865		5.106	5.086	5.11853		-0.0714969	0.016793	-0.027352		-0.0514969	0.036793	-0.00735195		-0.0840286	0.00426124	-0.0398837		Opus268	RMSD	0.186126	0.337118	0.255648
02_Water-MeOH_1.25_dimer.out	-191.971	02_Water-MeOH_1.25_cpA.out	-115.6	02_Water-MeOH_1.25_cpB.out	-76.364	02_Water-MeOH_1.00_monomerA.out	-76.364	02_Water-MeOH_1.00_monomerB.out	-115.6		3.91363	3.97035	3.94199		3.956	3.947	3.96658		-0.0423664	0.0143476	-0.0140094		-0.0333664	0.0233476	-0.00500941		-0.0529457	0.00376828	-0.0245887			H bonds	0.2029	0.346045	0.271633
02_Water-MeOH_1.50_dimer.out	-191.968	02_Water-MeOH_1.50_cpA.out	-115.6	02_Water-MeOH_1.50_cpB.out	-76.364	02_Water-MeOH_1.00_monomerA.out	-76.364	02_Water-MeOH_1.00_monomerB.out	-115.6		2.35955	2.39068	2.37511		2.391	2.385	2.39407		-0.0314549	-0.00031972	-0.0158873		-0.0254549	0.00568028	-0.0098873		-0.0345252	-0.00339001	-0.0189576			pi stack	0.167555	0.387321	0.259773
02_Water-MeOH_2.00_dimer.out	-191.966	02_Water-MeOH_2.00_cpA.out	-115.6	02_Water-MeOH_2.00_cpB.out	-76.364	02_Water-MeOH_1.00_monomerA.out	-76.364	02_Water-MeOH_1.00_monomerB.out	-115.6		0.934598	0.944318	0.939458		0.954	0.952	0.954668		-0.0194024	-0.00968175	-0.0145421		-0.0174024	-0.00768175	-0.0125421		-0.0200702	-0.0103496	-0.0152099			London	0.256197	0.427763	0.341037
03_Water-MeNH2_0.90_dimer.out	-172.114	03_Water-MeNH2_0.90_cpA.out	-95.7391	03_Water-MeNH2_0.90_cpB.out	-76.364	03_Water-MeNH2_1.00_monomerA.out	-76.3639	03_Water-MeNH2_1.00_monomerB.out	-95.739		6.60067	6.7615	6.68108		6.606	6.53	6.57684		-0.00533099	0.155499	0.0750838		0.070669	0.231499	0.151084		0.0238335	0.184663	0.104248			mixed	0.10137	0.208288	0.146567
03_Water-MeNH2_0.95_dimer.out	-172.114	03_Water-MeNH2_0.95_cpA.out	-95.7391	03_Water-MeNH2_0.95_cpB.out	-76.364	03_Water-MeNH2_1.00_monomerA.out	-76.3639	03_Water-MeNH2_1.00_monomerB.out	-95.739		6.96782	7.10368	7.03575		6.957	6.897	6.93748		0.0108217	0.146679	0.0787503		0.0708217	0.206679	0.13875		0.0303445	0.166202	0.0982731
03_Water-MeNH2_1.00_dimer.out	-172.114	03_Water-MeNH2_1.00_cpA.out	-95.7391	03_Water-MeNH2_1.00_cpB.out	-76.364	03_Water-MeNH2_1.00_monomerA.out	-76.3639	03_Water-MeNH2_1.00_monomerB.out	-95.739		6.96315	7.07864	7.02089		6.941	6.894	6.9286		0.0221482	0.137637	0.0798926		0.0691482	0.184637	0.126893		0.0345491	0.150038	0.0922935
03_Water-MeNH2_1.05_dimer.out	-172.114	03_Water-MeNH2_1.05_cpA.out	-95.7391	03_Water-MeNH2_1.05_cpB.out	-76.364	03_Water-MeNH2_1.00_monomerA.out	-76.3639	03_Water-MeNH2_1.00_monomerB.out	-95.739		6.72624	6.82499	6.77562		6.695	6.66	6.68924		0.0312439	0.129994	0.0806189		0.0662439	0.164994	0.115619		0.0370054	0.135755	0.0863803
03_Water-MeNH2_1.10_dimer.out	-172.113	03_Water-MeNH2_1.10_cpA.out	-95.7391	03_Water-MeNH2_1.10_cpB.out	-76.364	03_Water-MeNH2_1.00_monomerA.out	-76.3639	03_Water-MeNH2_1.00_monomerB.out	-95.739		6.35291	6.43808	6.3955		6.318	6.291	6.31548		0.0349098	0.120083	0.0774962		0.0619098	0.147083	0.104496		0.0374272	0.1226	0.0800136
03_Water-MeNH2_1.25_dimer.out	-172.111	03_Water-MeNH2_1.25_cpA.out	-95.739	03_Water-MeNH2_1.25_cpB.out	-76.3639	03_Water-MeNH2_1.00_monomerA.out	-76.3639	03_Water-MeNH2_1.00_monomerB.out	-95.739		4.96126	5.01748	4.98937		4.928	4.916	4.93163		0.0332627	0.0894845	0.0613736		0.0452627	0.101485	0.0733736		0.0296355	0.0858573	0.0577464
03_Water-MeNH2_1.50_dimer.out	-172.108	03_Water-MeNH2_1.50_cpA.out	-95.739	03_Water-MeNH2_1.50_cpB.out	-76.3639	03_Water-MeNH2_1.00_monomerA.out	-76.3639	03_Water-MeNH2_1.00_monomerB.out	-95.739		2.986	3.01608	3.00104		2.98	2.973	2.9817		0.00600265	0.0360794	0.021041		0.0130027	0.0430794	0.028041		0.00429925	0.034376	0.0193376
03_Water-MeNH2_2.00_dimer.out	-172.105	03_Water-MeNH2_2.00_cpA.out	-95.739	03_Water-MeNH2_2.00_cpB.out	-76.3639	03_Water-MeNH2_1.00_monomerA.out	-76.3639	03_Water-MeNH2_1.00_monomerB.out	-95.739		1.12906	1.13903	1.13404		1.142	1.14	1.14331		-0.0129374	-0.00297497	-0.00795619		-0.0109374	-0.000974968	-0.00595619		-0.0142453	-0.00428281	-0.00926404
04_Water-Peptide_0.90_dimer.out	-324.609	04_Water-Peptide_0.90_cpA.out	-248.233	04_Water-Peptide_0.90_cpB.out	-76.3641	04_Water-Peptide_1.00_monomerA.out	-76.3639	04_Water-Peptide_1.00_monomerB.out	-248.233		7.44193	7.64795	7.54494		7.739	7.666	7.74844		-0.297071	-0.091049	-0.19406		-0.224071	-0.018049	-0.12106		-0.306508	-0.100486	-0.203497
04_Water-Peptide_0.95_dimer.out	-324.61	04_Water-Peptide_0.95_cpA.out	-248.233	04_Water-Peptide_0.95_cpB.out	-76.3641	04_Water-Peptide_1.00_monomerA.out	-76.3639	04_Water-Peptide_1.00_monomerB.out	-248.233		7.88155	8.05954	7.97055		8.131	8.076	8.14892		-0.249449	-0.0714592	-0.160454		-0.194449	-0.0164592	-0.105454		-0.267364	-0.0893743	-0.178369
04_Water-Peptide_1.00_dimer.out	-324.61	04_Water-Peptide_1.00_cpA.out	-248.233	04_Water-Peptide_1.00_cpB.out	-76.3641	04_Water-Peptide_1.00_monomerA.out	-76.3639	04_Water-Peptide_1.00_monomerB.out	-248.233		7.92031	8.07512	7.99771		8.128	8.089	8.153		-0.207693	-0.0528815	-0.130287		-0.168693	-0.0138815	-0.0912872		-0.232689	-0.0778776	-0.155283
04_Water-Peptide_1.05_dimer.out	-324.61	04_Water-Peptide_1.05_cpA.out	-248.233	04_Water-Peptide_1.05_cpB.out	-76.364	04_Water-Peptide_1.00_monomerA.out	-76.3639	04_Water-Peptide_1.00_monomerB.out	-248.233		7.70556	7.84099	7.77328		7.878	7.851	7.90748		-0.172443	-0.0370063	-0.104725		-0.145443	-0.0100063	-0.0777247		-0.20192	-0.0664832	-0.134202
04_Water-Peptide_1.10_dimer.out	-324.609	04_Water-Peptide_1.10_cpA.out	-248.233	04_Water-Peptide_1.10_cpB.out	-76.364	04_Water-Peptide_1.00_monomerA.out	-76.3639	04_Water-Peptide_1.00_monomerB.out	-248.233		7.33914	7.45818	7.39866		7.482	7.465	7.51416		-0.142857	-0.0238182	-0.0833378		-0.125857	-0.00681819	-0.0663378		-0.175014	-0.0559748	-0.115494
04_Water-Peptide_1.25_dimer.out	-324.607	04_Water-Peptide_1.25_cpA.out	-248.233	04_Water-Peptide_1.25_cpB.out	-76.364	04_Water-Peptide_1.00_monomerA.out	-76.3639	04_Water-Peptide_1.00_monomerB.out	-248.233		5.90698	5.98903	5.948		5.994	5.991	6.02344		-0.087025	-0.00497295	-0.045999		-0.084025	-0.00197295	-0.042999		-0.116469	-0.0344168	-0.0754428
04_Water-Peptide_1.50_dimer.out	-324.603	04_Water-Peptide_1.50_cpA.out	-248.233	04_Water-Peptide_1.50_cpB.out	-76.364	04_Water-Peptide_1.00_monomerA.out	-76.3639	04_Water-Peptide_1.00_monomerB.out	-248.233		3.77323	3.82069	3.79696		3.83	3.828	3.84403		-0.0567741	-0.00931435	-0.0330442		-0.0547741	-0.00731435	-0.0310442		-0.070809	-0.0233493	-0.0470791
04_Water-Peptide_2.00_dimer.out	-324.599	04_Water-Peptide_2.00_cpA.out	-248.233	04_Water-Peptide_2.00_cpB.out	-76.3639	04_Water-Peptide_1.00_monomerA.out	-76.3639	04_Water-Peptide_1.00_monomerB.out	-248.233		1.40588	1.41951	1.4127		1.439	1.437	1.44228		-0.0331155	-0.0194914	-0.0263035		-0.0311155	-0.0174914	-0.0243035		-0.0363971	-0.022773	-0.0295851
05_MeOH-MeOH_0.90_dimer.out	-231.209	05_MeOH-MeOH_0.90_cpA.out	-115.6	05_MeOH-MeOH_0.90_cpB.out	-115.6	05_MeOH-MeOH_1.00_monomerA.out	-115.6	05_MeOH-MeOH_1.00_monomerB.out	-115.6		5.09799	5.27169	5.18484		5.387	5.328	5.39588		-0.289012	-0.115309	-0.20216		-0.230012	-0.056309	-0.14316		-0.297895	-0.124192	-0.211043
05_MeOH-MeOH_0.95_dimer.out	-231.21	05_MeOH-MeOH_0.95_cpA.out	-115.6	05_MeOH-MeOH_0.95_cpB.out	-115.6	05_MeOH-MeOH_1.00_monomerA.out	-115.6	05_MeOH-MeOH_1.00_monomerB.out	-115.6		5.52825	5.67551	5.60188		5.771	5.727	5.78687		-0.242752	-0.0954866	-0.169119		-0.198752	-0.0514866	-0.125119		-0.258619	-0.111354	-0.184986
05_MeOH-MeOH_1.00_dimer.out	-231.21	05_MeOH-MeOH_1.00_cpA.out	-115.6	05_MeOH-MeOH_1.00_cpB.out	-115.6	05_MeOH-MeOH_1.00_monomerA.out	-115.6	05_MeOH-MeOH_1.00_monomerB.out	-115.6		5.59988	5.72581	5.66284		5.804	5.773	5.82437		-0.204125	-0.0781918	-0.141158		-0.173125	-0.0471918	-0.110158		-0.224496	-0.0985629	-0.161529
05_MeOH-MeOH_1.05_dimer.out	-231.209	05_MeOH-MeOH_1.05_cpA.out	-115.6	05_MeOH-MeOH_1.05_cpB.out	-115.6	05_MeOH-MeOH_1.00_monomerA.out	-115.6	05_MeOH-MeOH_1.00_monomerB.out	-115.6		5.44901	5.55748	5.50325		5.62	5.599	5.64391		-0.17099	-0.0625167	-0.116754		-0.14999	-0.0415167	-0.0957536		-0.194903	-0.0864297	-0.140667
05_MeOH-MeOH_1.10_dimer.out	-231.209	05_MeOH-MeOH_1.10_cpA.out	-115.6	05_MeOH-MeOH_1.10_cpB.out	-115.6	05_MeOH-MeOH_1.00_monomerA.out	-115.6	05_MeOH-MeOH_1.00_monomerB.out	-115.6		5.1679	5.26171	5.21481		5.312	5.299	5.33682		-0.144103	-0.0502869	-0.0971949		-0.131103	-0.0372869	-0.0841949		-0.168927	-0.0751114	-0.122019
05_MeOH-MeOH_1.25_dimer.out	-231.207	05_MeOH-MeOH_1.25_cpA.out	-115.6	05_MeOH-MeOH_1.25_cpB.out	-115.6	05_MeOH-MeOH_1.00_monomerA.out	-115.6	05_MeOH-MeOH_1.00_monomerB.out	-115.6		4.05823	4.12033	4.08928		4.151	4.147	4.17157		-0.0927688	-0.030673	-0.0617209		-0.0887688	-0.026673	-0.0577209		-0.113336	-0.0512405	-0.0822884
05_MeOH-MeOH_1.50_dimer.out	-231.204	05_MeOH-MeOH_1.50_cpA.out	-115.6	05_MeOH-MeOH_1.50_cpB.out	-115.6	05_MeOH-MeOH_1.00_monomerA.out	-115.6	05_MeOH-MeOH_1.00_monomerB.out	-115.6		2.46997	2.50518	2.48757		2.528	2.526	2.53824		-0.0580328	-0.0228215	-0.0404271		-0.0560328	-0.0208215	-0.0384271		-0.0682768	-0.0330655	-0.0506711
05_MeOH-MeOH_2.00_dimer.out	-231.202	05_MeOH-MeOH_2.00_cpA.out	-115.6	05_MeOH-MeOH_2.00_cpB.out	-115.6	05_MeOH-MeOH_1.00_monomerA.out	-115.6	05_MeOH-MeOH_1.00_monomerB.out	-115.6		0.982727	0.994583	0.988655		1.011	1.01	1.01501		-0.0282727	-0.0164166	-0.0223446		-0.0272727	-0.0154166	-0.0213446		-0.0322868	-0.0204308	-0.0263588
06_MeOH-MeNH2_0.90_dimer.out	-211.35	06_MeOH-MeNH2_0.90_cpA.out	-95.7392	06_MeOH-MeNH2_0.90_cpB.out	-115.6	06_MeOH-MeNH2_1.00_monomerA.out	-115.6	06_MeOH-MeNH2_1.00_monomerB.out	-95.739		6.88463	7.07002	6.97733		7.081	7.006	7.06731		-0.196368	-0.0109783	-0.103673		-0.121368	0.0640217	-0.0286729		-0.182676	0.00271341	-0.0899813
06_MeOH-MeNH2_0.95_dimer.out	-211.351	06_MeOH-MeNH2_0.95_cpA.out	-95.7392	06_MeOH-MeNH2_0.95_cpB.out	-115.6	06_MeOH-MeNH2_1.00_monomerA.out	-115.6	06_MeOH-MeNH2_1.00_monomerB.out	-95.739		7.39672	7.55407	7.47539		7.554	7.497	7.54963		-0.157278	6.56523e-05	-0.0786063		-0.100278	0.0570657	-0.0216063		-0.152912	0.00443202	-0.07424
06_MeOH-MeNH2_1.00_dimer.out	-211.351	06_MeOH-MeNH2_1.00_cpA.out	-95.7391	06_MeOH-MeNH2_1.00_cpB.out	-115.6	06_MeOH-MeNH2_1.00_monomerA.out	-115.6	06_MeOH-MeNH2_1.00_monomerB.out	-95.739		7.47504	7.60905	7.54205		7.601	7.558	7.60314		-0.125959	0.00804994	-0.0589548		-0.0829595	0.0510499	-0.0159548		-0.128097	0.00591248	-0.0610922
06_MeOH-MeNH2_1.05_dimer.out	-211.351	06_MeOH-MeNH2_1.05_cpA.out	-95.7391	06_MeOH-MeNH2_1.05_cpB.out	-115.6	06_MeOH-MeNH2_1.00_monomerA.out	-115.6	06_MeOH-MeNH2_1.00_monomerB.out	-95.739		7.27809	7.39257	7.33533		7.378	7.346	7.38503		-0.0999139	0.0145694	-0.0426723		-0.0679139	0.0465694	-0.0106723		-0.106939	0.0075439	-0.0496978
06_MeOH-MeNH2_1.10_dimer.out	-211.35	06_MeOH-MeNH2_1.10_cpA.out	-95.7391	06_MeOH-MeNH2_1.10_cpB.out	-115.6	06_MeOH-MeNH2_1.00_monomerA.out	-115.6	06_MeOH-MeNH2_1.00_monomerB.out	-95.739		6.91509	7.01379	6.96444		6.994	6.971	7.00455		-0.0789084	0.0197925	-0.029558		-0.0559084	0.0427925	-0.00655796		-0.0894573	0.00924357	-0.0401069
06_MeOH-MeNH2_1.25_dimer.out	-211.348	06_MeOH-MeNH2_1.25_cpA.out	-95.7391	06_MeOH-MeNH2_1.25_cpB.out	-115.6	06_MeOH-MeNH2_1.00_monomerA.out	-115.6	06_MeOH-MeNH2_1.00_monomerB.out	-95.739		5.46102	5.52717	5.4941		5.505	5.497	5.51719		-0.043979	0.0221706	-0.0109042		-0.035979	0.0301706	-0.00290419		-0.0561731	0.00997652	-0.0230983
06_MeOH-MeNH2_1.50_dimer.out	-211.344	06_MeOH-MeNH2_1.50_cpA.out	-95.739	06_MeOH-MeNH2_1.50_cpB.out	-115.6	06_MeOH-MeNH2_1.00_monomerA.out	-115.6	06_MeOH-MeNH2_1.00_monomerB.out	-95.739		3.31276	3.34941	3.33108		3.345	3.342	3.35163		-0.0322444	0.00441122	-0.0139166		-0.0292444	0.00741122	-0.0109166		-0.0388732	-0.00221756	-0.0205454
06_MeOH-MeNH2_2.00_dimer.out	-211.341	06_MeOH-MeNH2_2.00_cpA.out	-95.739	06_MeOH-MeNH2_2.00_cpB.out	-115.6	06_MeOH-MeNH2_1.00_monomerA.out	-115.6	06_MeOH-MeNH2_1.00_monomerB.out	-95.739		1.2488	1.26127	1.25503		1.273	1.273	1.2771		-0.0241972	-0.0117342	-0.0179657		-0.0241972	-0.0117342	-0.0179657		-0.0282967	-0.0158337	-0.0220652
07_MeOH-Peptide_0.90_dimer.out	-363.845	07_MeOH-Peptide_0.90_cpA.out	-248.233	07_MeOH-Peptide_0.90_cpB.out	-115.6	07_MeOH-Peptide_1.00_monomerA.out	-115.6	07_MeOH-Peptide_1.00_monomerB.out	-248.233		7.32324	7.54258	7.43291		7.756	7.689	7.78382		-0.432761	-0.213418	-0.323089		-0.365761	-0.146418	-0.256089		-0.460581	-0.241238	-0.350909
07_MeOH-Peptide_0.95_dimer.out	-363.846	07_MeOH-Peptide_0.95_cpA.out	-248.233	07_MeOH-Peptide_0.95_cpB.out	-115.6	07_MeOH-Peptide_1.00_monomerA.out	-115.6	07_MeOH-Peptide_1.00_monomerB.out	-248.233		7.86049	8.04919	7.95484		8.235	8.186	8.27017		-0.374507	-0.185805	-0.280156		-0.325507	-0.136805	-0.231156		-0.409672	-0.220971	-0.315322
07_MeOH-Peptide_1.00_dimer.out	-363.846	07_MeOH-Peptide_1.00_cpA.out	-248.233	07_MeOH-Peptide_1.00_cpB.out	-115.6	07_MeOH-Peptide_1.00_monomerA.out	-115.6	07_MeOH-Peptide_1.00_monomerB.out	-248.233		7.96579	8.12933	8.04756		8.289	8.255	8.32956		-0.323212	-0.15967	-0.241441		-0.289212	-0.12567	-0.207441		-0.363769	-0.200228	-0.281999
07_MeOH-Peptide_1.05_dimer.out	-363.846	07_MeOH-Peptide_1.05_cpA.out	-248.233	07_MeOH-Peptide_1.05_cpB.out	-115.6	07_MeOH-Peptide_1.00_monomerA.out	-115.6	07_MeOH-Peptide_1.00_monomerB.out	-248.233		7.79432	7.93709	7.86571		8.072	8.051	8.11612		-0.277678	-0.134912	-0.206295		-0.256678	-0.113912	-0.185295		-0.321796	-0.17903	-0.250413
07_MeOH-Peptide_1.10_dimer.out	-363.845	07_MeOH-Peptide_1.10_cpA.out	-248.233	07_MeOH-Peptide_1.10_cpB.out	-115.6	07_MeOH-Peptide_1.00_monomerA.out	-115.6	07_MeOH-Peptide_1.00_monomerB.out	-248.233		7.45251	7.57786	7.51518		7.692	7.68	7.73713		-0.239494	-0.11414	-0.176817		-0.227494	-0.10214	-0.164817		-0.284628	-0.159274	-0.221951
07_MeOH-Peptide_1.25_dimer.out	-363.843	07_MeOH-Peptide_1.25_cpA.out	-248.233	07_MeOH-Peptide_1.25_cpB.out	-115.6	07_MeOH-Peptide_1.00_monomerA.out	-115.6	07_MeOH-Peptide_1.00_monomerB.out	-248.233		6.03009	6.11644	6.07327		6.188	6.19	6.2281		-0.157913	-0.0715551	-0.114734		-0.159913	-0.0735551	-0.116734		-0.198017	-0.111659	-0.154838
07_MeOH-Peptide_1.50_dimer.out	-363.839	07_MeOH-Peptide_1.50_cpA.out	-248.233	07_MeOH-Peptide_1.50_cpB.out	-115.6	07_MeOH-Peptide_1.00_monomerA.out	-115.6	07_MeOH-Peptide_1.00_monomerB.out	-248.233		3.55562	3.60298	3.5793		3.647	3.649	3.66818		-0.0913835	-0.0440165	-0.0677		-0.0933835	-0.0460165	-0.0697		-0.112568	-0.0652006	-0.0888841
07_MeOH-Peptide_2.00_dimer.out	-363.835	07_MeOH-Peptide_2.00_cpA.out	-248.233	07_MeOH-Peptide_2.00_cpB.out	-115.6	07_MeOH-Peptide_1.00_monomerA.out	-115.6	07_MeOH-Peptide_1.00_monomerB.out	-248.233		1.06303	1.07574	1.06938		1.098	1.099	1.10412		-0.0349673	-0.0222647	-0.028616		-0.0359673	-0.0232647	-0.029616		-0.0410886	-0.028386	-0.0347373
08_MeOH-Water_0.90_dimer.out	-191.972	08_MeOH-Water_0.90_cpA.out	-76.3642	08_MeOH-Water_0.90_cpB.out	-115.6	08_MeOH-Water_1.00_monomerA.out	-115.6	08_MeOH-Water_1.00_monomerB.out	-76.364		4.50631	4.65206	4.57919		4.675	4.629	4.6843		-0.168685	-0.0229439	-0.0958145		-0.122685	0.0230561	-0.0498145		-0.17799	-0.0322487	-0.105119
08_MeOH-Water_0.95_dimer.out	-191.972	08_MeOH-Water_0.95_cpA.out	-76.3642	08_MeOH-Water_0.95_cpB.out	-115.6	08_MeOH-Water_1.00_monomerA.out	-115.6	08_MeOH-Water_1.00_monomerB.out	-76.364		4.88113	5.00447	4.9428		5.017	4.985	5.03233		-0.135869	-0.0125261	-0.0741974		-0.103869	0.0194739	-0.0421974		-0.151202	-0.0278594	-0.0895307
08_MeOH-Water_1.00_dimer.out	-191.972	08_MeOH-Water_1.00_cpA.out	-76.3641	08_MeOH-Water_1.00_cpB.out	-115.6	08_MeOH-Water_1.00_monomerA.out	-115.6	08_MeOH-Water_1.00_monomerB.out	-76.364		4.93582	5.04126	4.98854		5.045	5.023	5.06346		-0.10918	-0.00373612	-0.0564579		-0.0871798	0.0182639	-0.0344579		-0.127638	-0.0221944	-0.0749162
08_MeOH-Water_1.05_dimer.out	-191.972	08_MeOH-Water_1.05_cpA.out	-76.3641	08_MeOH-Water_1.05_cpB.out	-115.6	08_MeOH-Water_1.00_monomerA.out	-115.6	08_MeOH-Water_1.00_monomerB.out	-76.364		4.79437	4.88512	4.83975		4.881	4.867	4.90126		-0.086627	0.00412056	-0.0412532		-0.072627	0.0181206	-0.0272532		-0.106885	-0.0161371	-0.0615109
08_MeOH-Water_1.10_dimer.out	-191.972	08_MeOH-Water_1.10_cpA.out	-76.3641	08_MeOH-Water_1.10_cpB.out	-115.6	08_MeOH-Water_1.00_monomerA.out	-115.6	08_MeOH-Water_1.00_monomerB.out	-76.364		4.53994	4.6183	4.57912		4.61	4.601	4.62922		-0.0700593	0.00830045	-0.0308794		-0.0610593	0.0173004	-0.0218794		-0.0892824	-0.0109226	-0.0501025
08_MeOH-Water_1.25_dimer.out	-191.97	08_MeOH-Water_1.25_cpA.out	-76.3641	08_MeOH-Water_1.25_cpB.out	-115.6	08_MeOH-Water_1.00_monomerA.out	-115.6	08_MeOH-Water_1.00_monomerB.out	-76.364		3.55719	3.6092	3.5832		3.598	3.595	3.61094		-0.0408059	0.0112027	-0.0148016		-0.0378059	0.0142027	-0.0118016		-0.0537505	-0.00174194	-0.0277462
08_MeOH-Water_1.50_dimer.out	-191.968	08_MeOH-Water_1.50_cpA.out	-76.3641	08_MeOH-Water_1.50_cpB.out	-115.6	08_MeOH-Water_1.00_monomerA.out	-115.6	08_MeOH-Water_1.00_monomerB.out	-76.364		2.17638	2.20672	2.19155		2.205	2.201	2.20797		-0.0286158	0.00171505	-0.0134504		-0.0246158	0.00571505	-0.00945037		-0.0315843	-0.00125347	-0.0164189
08_MeOH-Water_2.00_dimer.out	-191.966	08_MeOH-Water_2.00_cpA.out	-76.364	08_MeOH-Water_2.00_cpB.out	-115.6	08_MeOH-Water_1.00_monomerA.out	-115.6	08_MeOH-Water_1.00_monomerB.out	-76.364		0.894359	0.907102	0.900731		0.909	0.908	0.909445		-0.0146409	-0.0018979	-0.00826941		-0.0136409	-0.000897896	-0.00726941		-0.0150862	-0.00234313	-0.00871464
09_MeNH2-MeOH_0.90_dimer.out	-211.344	09_MeNH2-MeOH_0.90_cpA.out	-115.6	09_MeNH2-MeOH_0.90_cpB.out	-95.739	09_MeNH2-MeOH_1.00_monomerA.out	-95.739	09_MeNH2-MeOH_1.00_monomerB.out	-115.6		2.61748	2.73769	2.67759		2.837	2.813	2.8623		-0.219516	-0.0993078	-0.159412		-0.195516	-0.0753078	-0.135412		-0.244814	-0.124606	-0.18471
09_MeNH2-MeOH_0.95_dimer.out	-211.344	09_MeNH2-MeOH_0.95_cpA.out	-115.6	09_MeNH2-MeOH_0.95_cpB.out	-95.739	09_MeNH2-MeOH_1.00_monomerA.out	-95.739	09_MeNH2-MeOH_1.00_monomerB.out	-115.6		2.87139	2.97261	2.922		3.051	3.037	3.07802		-0.179607	-0.0783887	-0.128998		-0.165607	-0.0643887	-0.114998		-0.206624	-0.105405	-0.156014
09_MeNH2-MeOH_1.00_dimer.out	-211.344	09_MeNH2-MeOH_1.00_cpA.out	-115.6	09_MeNH2-MeOH_1.00_cpB.out	-95.739	09_MeNH2-MeOH_1.00_monomerA.out	-95.739	09_MeNH2-MeOH_1.00_monomerB.out	-115.6		2.88764	2.97302	2.93033		3.037	3.029	3.06325		-0.149363	-0.0639806	-0.106672		-0.141363	-0.0559806	-0.098672		-0.175615	-0.0902323	-0.132924
09_MeNH2-MeOH_1.05_dimer.out	-211.344	09_MeNH2-MeOH_1.05_cpA.out	-115.6	09_MeNH2-MeOH_1.05_cpB.out	-95.739	09_MeNH2-MeOH_1.00_monomerA.out	-95.739	09_MeNH2-MeOH_1.00_monomerB.out	-115.6		2.76698	2.83933	2.80315		2.892	2.889	2.91723		-0.125024	-0.0526719	-0.0888479		-0.122024	-0.0496719	-0.0858479		-0.150252	-0.0779003	-0.114076
09_MeNH2-MeOH_1.10_dimer.out	-211.343	09_MeNH2-MeOH_1.10_cpA.out	-115.6	09_MeNH2-MeOH_1.10_cpB.out	-95.739	09_MeNH2-MeOH_1.00_monomerA.out	-95.739	09_MeNH2-MeOH_1.00_monomerB.out	-115.6		2.57427	2.63615	2.60521		2.682	2.68	2.70387		-0.10773	-0.0458485	-0.0767895		-0.10573	-0.0438485	-0.0747895		-0.129601	-0.0677187	-0.0986597
09_MeNH2-MeOH_1.25_dimer.out	-211.342	09_MeNH2-MeOH_1.25_cpA.out	-115.6	09_MeNH2-MeOH_1.25_cpB.out	-95.739	09_MeNH2-MeOH_1.00_monomerA.out	-95.739	09_MeNH2-MeOH_1.00_monomerB.out	-115.6		1.89459	1.93534	1.91496		1.971	1.97	1.98385		-0.0764117	-0.0356616	-0.0560366		-0.0754117	-0.0346616	-0.0550366		-0.0892628	-0.0485127	-0.0688877
09_MeNH2-MeOH_1.50_dimer.out	-211.341	09_MeNH2-MeOH_1.50_cpA.out	-115.6	09_MeNH2-MeOH_1.50_cpB.out	-95.739	09_MeNH2-MeOH_1.00_monomerA.out	-95.739	09_MeNH2-MeOH_1.00_monomerB.out	-115.6		1.04674	1.06767	1.0572		1.098	1.097	1.10419		-0.0512587	-0.0303336	-0.0407961		-0.0502587	-0.0293336	-0.0397961		-0.0574519	-0.0365269	-0.0469894
09_MeNH2-MeOH_2.00_dimer.out	-211.34	09_MeNH2-MeOH_2.00_cpA.out	-115.6	09_MeNH2-MeOH_2.00_cpB.out	-95.739	09_MeNH2-MeOH_1.00_monomerA.out	-95.739	09_MeNH2-MeOH_1.00_monomerB.out	-115.6		0.376641	0.383984	0.380313		0.393	0.394	0.39645		-0.016359	-0.00901566	-0.0126873		-0.017359	-0.0100157	-0.0136873		-0.0198094	-0.0124661	-0.0161378
10_MeNH2-MeNH2_0.90_dimer.out	-191.484	10_MeNH2-MeNH2_0.90_cpA.out	-95.7391	10_MeNH2-MeNH2_0.90_cpB.out	-95.7391	10_MeNH2-MeNH2_1.00_monomerA.out	-95.739	10_MeNH2-MeNH2_1.00_monomerB.out	-95.739		3.44439	3.58131	3.51285		3.722	3.671	3.72444		-0.277612	-0.140686	-0.209149		-0.226612	-0.0896863	-0.158149		-0.280055	-0.143129	-0.211592
10_MeNH2-MeNH2_0.95_dimer.out	-191.484	10_MeNH2-MeNH2_0.95_cpA.out	-95.7391	10_MeNH2-MeNH2_0.95_cpB.out	-95.739	10_MeNH2-MeNH2_1.00_monomerA.out	-95.739	10_MeNH2-MeNH2_1.00_monomerB.out	-95.739		3.88427	4.00029	3.94228		4.104	4.068	4.11268		-0.219725	-0.103711	-0.161718		-0.183725	-0.067711	-0.125718		-0.228405	-0.112391	-0.170398
10_MeNH2-MeNH2_1.00_dimer.out	-191.484	10_MeNH2-MeNH2_1.00_cpA.out	-95.7391	10_MeNH2-MeNH2_1.00_cpB.out	-95.739	10_MeNH2-MeNH2_1.00_monomerA.out	-95.739	10_MeNH2-MeNH2_1.00_monomerB.out	-95.739		3.97754	4.07604	4.02679		4.153	4.127	4.16466		-0.175457	-0.0769602	-0.126209		-0.149457	-0.0509602	-0.100209		-0.18712	-0.0886238	-0.137872
10_MeNH2-MeNH2_1.05_dimer.out	-191.484	10_MeNH2-MeNH2_1.05_cpA.out	-95.7391	10_MeNH2-MeNH2_1.05_cpB.out	-95.739	10_MeNH2-MeNH2_1.00_monomerA.out	-95.739	10_MeNH2-MeNH2_1.00_monomerB.out	-95.739		3.86073	3.9447	3.90272		4.002	3.985	4.01591		-0.14127	-0.0572976	-0.0992838		-0.12427	-0.0402976	-0.0822838		-0.15518	-0.0712073	-0.113194
10_MeNH2-MeNH2_1.10_dimer.out	-191.484	10_MeNH2-MeNH2_1.10_cpA.out	-95.739	10_MeNH2-MeNH2_1.10_cpB.out	-95.739	10_MeNH2-MeNH2_1.00_monomerA.out	-95.739	10_MeNH2-MeNH2_1.00_monomerB.out	-95.739		3.62569	3.69738	3.66154		3.742	3.73	3.75635		-0.116308	-0.0446197	-0.080464		-0.104308	-0.0326197	-0.068464		-0.130659	-0.0589708	-0.0948151
10_MeNH2-MeNH2_1.25_dimer.out	-191.482	10_MeNH2-MeNH2_1.25_cpA.out	-95.739	10_MeNH2-MeNH2_1.25_cpB.out	-95.739	10_MeNH2-MeNH2_1.00_monomerA.out	-95.739	10_MeNH2-MeNH2_1.00_monomerB.out	-95.739		2.70345	2.74827	2.72586		2.781	2.777	2.79299		-0.0775543	-0.0327339	-0.0551441		-0.0735543	-0.0287339	-0.0511441		-0.0895419	-0.0447215	-0.0671317
10_MeNH2-MeNH2_1.50_dimer.out	-191.48	10_MeNH2-MeNH2_1.50_cpA.out	-95.739	10_MeNH2-MeNH2_1.50_cpB.out	-95.739	10_MeNH2-MeNH2_1.00_monomerA.out	-95.739	10_MeNH2-MeNH2_1.00_monomerB.out	-95.739		1.24817	1.26696	1.25756		1.302	1.302	1.30885		-0.0538304	-0.0350434	-0.0444369		-0.0538304	-0.0350434	-0.0444369		-0.0606829	-0.041896	-0.0512895
10_MeNH2-MeNH2_2.00_dimer.out	-191.479	10_MeNH2-MeNH2_2.00_cpA.out	-95.739	10_MeNH2-MeNH2_2.00_cpB.out	-95.739	10_MeNH2-MeNH2_1.00_monomerA.out	-95.739	10_MeNH2-MeNH2_1.00_monomerB.out	-95.739		0.370728	0.376105	0.373416		0.385	0.388	0.38974		-0.0142718	-0.00889534	-0.0115836		-0.0172718	-0.0118953	-0.0145836		-0.0190121	-0.0136356	-0.0163238
11_MeNH2-Peptide_0.90_dimer.out	-343.98	11_MeNH2-Peptide_0.90_cpA.out	-248.234	11_MeNH2-Peptide_0.90_cpB.out	-95.7391	11_MeNH2-Peptide_1.00_monomerA.out	-95.7389	11_MeNH2-Peptide_1.00_monomerB.out	-248.233		4.48181	4.6801	4.58096		4.958	4.922	5.00913		-0.476191	-0.277896	-0.377044		-0.440191	-0.241896	-0.341044		-0.527325	-0.32903	-0.428177
11_MeNH2-Peptide_0.95_dimer.out	-343.981	11_MeNH2-Peptide_0.95_cpA.out	-248.234	11_MeNH2-Peptide_0.95_cpB.out	-95.739	11_MeNH2-Peptide_1.00_monomerA.out	-95.7389	11_MeNH2-Peptide_1.00_monomerB.out	-248.233		4.9578	5.12951	5.04365		5.354	5.334	5.40909		-0.396198	-0.224492	-0.310345		-0.376198	-0.204492	-0.290345		-0.451291	-0.279585	-0.365438
11_MeNH2-Peptide_1.00_dimer.out	-343.981	11_MeNH2-Peptide_1.00_cpA.out	-248.234	11_MeNH2-Peptide_1.00_cpB.out	-95.739	11_MeNH2-Peptide_1.00_monomerA.out	-95.7389	11_MeNH2-Peptide_1.00_monomerB.out	-248.233		5.06592	5.2146	5.14026		5.397	5.387	5.45281		-0.33108	-0.182398	-0.256739		-0.32108	-0.172398	-0.246739		-0.386894	-0.238213	-0.312554
11_MeNH2-Peptide_1.05_dimer.out	-343.98	11_MeNH2-Peptide_1.05_cpA.out	-248.234	11_MeNH2-Peptide_1.05_cpB.out	-95.739	11_MeNH2-Peptide_1.00_monomerA.out	-95.7389	11_MeNH2-Peptide_1.00_monomerB.out	-248.233		4.94474	5.07376	5.00925		5.222	5.221	5.27745		-0.277258	-0.148244	-0.212751		-0.276258	-0.147244	-0.211751		-0.332708	-0.203694	-0.268201
11_MeNH2-Peptide_1.10_dimer.out	-343.98	11_MeNH2-Peptide_1.10_cpA.out	-248.234	11_MeNH2-Peptide_1.10_cpB.out	-95.739	11_MeNH2-Peptide_1.00_monomerA.out	-95.7389	11_MeNH2-Peptide_1.00_monomerB.out	-248.233		4.68806	4.80059	4.74432		4.923	4.926	4.97585		-0.23494	-0.12241	-0.178675		-0.23794	-0.12541	-0.181675		-0.287793	-0.175263	-0.231528
11_MeNH2-Peptide_1.25_dimer.out	-343.977	11_MeNH2-Peptide_1.25_cpA.out	-248.233	11_MeNH2-Peptide_1.25_cpB.out	-95.739	11_MeNH2-Peptide_1.00_monomerA.out	-95.7389	11_MeNH2-Peptide_1.00_monomerB.out	-248.233		3.06417	3.12556	3.09486		3.197	3.204	3.2298		-0.132834	-0.0714395	-0.102137		-0.139834	-0.0784395	-0.109137		-0.165631	-0.104236	-0.134934
11_MeNH2-Peptide_1.50_dimer.out	-343.974	11_MeNH2-Peptide_1.50_cpA.out	-248.233	11_MeNH2-Peptide_1.50_cpB.out	-95.7389	11_MeNH2-Peptide_1.00_monomerA.out	-95.7389	11_MeNH2-Peptide_1.00_monomerB.out	-248.233		1.32085	1.34463	1.33274		1.397	1.402	1.41274		-0.0761526	-0.0523676	-0.0642601		-0.0811526	-0.0573676	-0.0692601		-0.0918885	-0.0681036	-0.0799961
11_MeNH2-Peptide_2.00_dimer.out	-343.973	11_MeNH2-Peptide_2.00_cpA.out	-248.233	11_MeNH2-Peptide_2.00_cpB.out	-95.7389	11_MeNH2-Peptide_1.00_monomerA.out	-95.7389	11_MeNH2-Peptide_1.00_monomerB.out	-248.233		0.43591	0.442951	0.43943		0.455	0.457	0.460212		-0.0190897	-0.0120494	-0.0155695		-0.0210897	-0.0140494	-0.0175695		-0.0243021	-0.0172618	-0.020782
12_MeNH2-Water_0.90_dimer.out	-172.114	12_MeNH2-Water_0.90_cpA.out	-76.364	12_MeNH2-Water_0.90_cpB.out	-95.7391	12_MeNH2-Water_1.00_monomerA.out	-95.739	12_MeNH2-Water_1.00_monomerB.out	-76.3639		6.75991	6.93932	6.84961		6.861	6.777	6.83393		-0.101095	0.0783222	-0.0113862		-0.0170946	0.162322	0.0726138		-0.0740262	0.105391	0.0156821
12_MeNH2-Water_0.95_dimer.out	-172.115	12_MeNH2-Water_0.95_cpA.out	-76.364	12_MeNH2-Water_0.95_cpB.out	-95.7391	12_MeNH2-Water_1.00_monomerA.out	-95.739	12_MeNH2-Water_1.00_monomerB.out	-76.3639		7.22211	7.37482	7.29847		7.291	7.224	7.27212		-0.0688896	0.0838212	0.00746579		-0.00188963	0.150821	0.0744658		-0.0500131	0.102698	0.0263424
12_MeNH2-Water_1.00_dimer.out	-172.115	12_MeNH2-Water_1.00_cpA.out	-76.364	12_MeNH2-Water_1.00_cpB.out	-95.7391	12_MeNH2-Water_1.00_monomerA.out	-95.739	12_MeNH2-Water_1.00_monomerB.out	-76.3639		7.26865	7.39917	7.33391		7.312	7.259	7.29992		-0.0433483	0.0871733	0.0219125		0.00965167	0.140173	0.0749125		-0.0312715	0.0992501	0.0339893
12_MeNH2-Water_1.05_dimer.out	-172.114	12_MeNH2-Water_1.05_cpA.out	-76.364	12_MeNH2-Water_1.05_cpB.out	-95.7391	12_MeNH2-Water_1.00_monomerA.out	-95.739	12_MeNH2-Water_1.00_monomerB.out	-76.3639		7.05307	7.16507	7.10907		7.077	7.036	7.07008		-0.0239323	0.0880714	0.0320696		0.0170677	0.129071	0.0730696		-0.0170121	0.0949917	0.0389898
12_MeNH2-Water_1.10_dimer.out	-172.114	12_MeNH2-Water_1.10_cpA.out	-76.364	12_MeNH2-Water_1.10_cpB.out	-95.7391	12_MeNH2-Water_1.00_monomerA.out	-95.739	12_MeNH2-Water_1.00_monomerB.out	-76.3639		6.68163	6.77826	6.72995		6.691	6.659	6.68838		-0.00936657	0.0872605	0.038947		0.0226334	0.119261	0.070947		-0.00674239	0.0898847	0.0415712
12_MeNH2-Water_1.25_dimer.out	-172.111	12_MeNH2-Water_1.25_cpA.out	-76.3639	12_MeNH2-Water_1.25_cpB.out	-95.739	12_MeNH2-Water_1.00_monomerA.out	-95.739	12_MeNH2-Water_1.00_monomerB.out	-76.3639		5.23814	5.30208	5.27011		5.231	5.217	5.23424		0.00713854	0.0710773	0.0391079		0.0211385	0.0850773	0.0531079		0.00389589	0.0678346	0.0358652
12_MeNH2-Water_1.50_dimer.out	-172.108	12_MeNH2-Water_1.50_cpA.out	-76.3639	12_MeNH2-Water_1.50_cpB.out	-95.739	12_MeNH2-Water_1.00_monomerA.out	-95.739	12_MeNH2-Water_1.00_monomerB.out	-76.3639		3.14968	3.18335	3.16651		3.155	3.149	3.15783		-0.00532117	0.0283471	0.011513		0.000678832	0.0343471	0.017513		-0.00814877	0.0255195	0.00868536
12_MeNH2-Water_2.00_dimer.out	-172.105	12_MeNH2-Water_2.00_cpA.out	-76.3639	12_MeNH2-Water_2.00_cpB.out	-95.739	12_MeNH2-Water_1.00_monomerA.out	-95.739	12_MeNH2-Water_1.00_monomerB.out	-76.3639		1.17982	1.19084	1.18533		1.196	1.195	1.19853		-0.0161758	-0.00516132	-0.0106686		-0.0151758	-0.00416132	-0.00966858		-0.018709	-0.00769444	-0.0132017
13_Peptide-MeOH_0.90_dimer.out	-363.843	13_Peptide-MeOH_0.90_cpA.out	-115.601	13_Peptide-MeOH_0.90_cpB.out	-248.234	13_Peptide-MeOH_1.00_monomerA.out	-248.233	13_Peptide-MeOH_1.00_monomerB.out	-115.6		5.3341	5.53493	5.43451		5.753	5.725	5.81102		-0.418902	-0.218072	-0.318487		-0.390902	-0.190072	-0.290487		-0.476925	-0.276096	-0.376511
13_Peptide-MeOH_0.95_dimer.out	-363.843	13_Peptide-MeOH_0.95_cpA.out	-115.6	13_Peptide-MeOH_0.95_cpB.out	-248.234	13_Peptide-MeOH_1.00_monomerA.out	-248.233	13_Peptide-MeOH_1.00_monomerB.out	-115.6		5.80623	5.97955	5.89289		6.165	6.149	6.22383		-0.358768	-0.185449	-0.272109		-0.342768	-0.169449	-0.256109		-0.417595	-0.244276	-0.330935
13_Peptide-MeOH_1.00_dimer.out	-363.843	13_Peptide-MeOH_1.00_cpA.out	-115.6	13_Peptide-MeOH_1.00_cpB.out	-248.233	13_Peptide-MeOH_1.00_monomerA.out	-248.233	13_Peptide-MeOH_1.00_monomerB.out	-115.6		5.9131	6.06374	5.98842		6.22	6.213	6.27817		-0.306901	-0.156256	-0.231578		-0.299901	-0.149256	-0.224578		-0.36507	-0.214425	-0.289748
13_Peptide-MeOH_1.05_dimer.out	-363.843	13_Peptide-MeOH_1.05_cpA.out	-115.6	13_Peptide-MeOH_1.05_cpB.out	-248.233	13_Peptide-MeOH_1.00_monomerA.out	-248.233	13_Peptide-MeOH_1.00_monomerB.out	-115.6		5.7905	5.9221	5.8563		6.054	6.053	6.1095		-0.263502	-0.131897	-0.1977		-0.262502	-0.130897	-0.1967		-0.318997	-0.187392	-0.253195
13_Peptide-MeOH_1.10_dimer.out	-363.843	13_Peptide-MeOH_1.10_cpA.out	-115.6	13_Peptide-MeOH_1.10_cpB.out	-248.233	13_Peptide-MeOH_1.00_monomerA.out	-248.233	13_Peptide-MeOH_1.00_monomerB.out	-115.6		5.53093	5.64617	5.58855		5.759	5.762	5.81023		-0.228071	-0.112833	-0.170452		-0.231071	-0.115833	-0.173452		-0.279297	-0.164059	-0.221678
13_Peptide-MeOH_1.25_dimer.out	-363.841	13_Peptide-MeOH_1.25_cpA.out	-115.6	13_Peptide-MeOH_1.25_cpB.out	-248.233	13_Peptide-MeOH_1.00_monomerA.out	-248.233	13_Peptide-MeOH_1.00_monomerB.out	-115.6		4.45217	4.52992	4.49105		4.608	4.615	4.6463		-0.15583	-0.078079	-0.116954		-0.16283	-0.085079	-0.123954		-0.194134	-0.116384	-0.155259
13_Peptide-MeOH_1.50_dimer.out	-363.838	13_Peptide-MeOH_1.50_cpA.out	-115.6	13_Peptide-MeOH_1.50_cpB.out	-248.233	13_Peptide-MeOH_1.00_monomerA.out	-248.233	13_Peptide-MeOH_1.00_monomerB.out	-115.6		2.84429	2.8861	2.86519		2.948	2.952	2.96981		-0.103714	-0.061903	-0.0828084		-0.107714	-0.065903	-0.0868084		-0.125522	-0.0837115	-0.104617
13_Peptide-MeOH_2.00_dimer.out	-363.836	13_Peptide-MeOH_2.00_cpA.out	-115.6	13_Peptide-MeOH_2.00_cpB.out	-248.233	13_Peptide-MeOH_1.00_monomerA.out	-248.233	13_Peptide-MeOH_1.00_monomerB.out	-115.6		1.25868	1.27331	1.266		1.307	1.308	1.31493		-0.0483183	-0.033686	-0.0410021		-0.0493183	-0.034686	-0.0420021		-0.0562437	-0.0416114	-0.0489276
14_Peptide-MeNH2_0.90_dimer.out	-343.983	14_Peptide-MeNH2_0.90_cpA.out	-95.7392	14_Peptide-MeNH2_0.90_cpB.out	-248.233	14_Peptide-MeNH2_1.00_monomerA.out	-248.233	14_Peptide-MeNH2_1.00_monomerB.out	-95.739		6.5795	6.78821	6.68386		6.907	6.86	6.93822		-0.3275	-0.118789	-0.223144		-0.2805	-0.0717892	-0.176144		-0.358715	-0.150004	-0.25436
14_Peptide-MeNH2_0.95_dimer.out	-343.984	14_Peptide-MeNH2_0.95_cpA.out	-95.7391	14_Peptide-MeNH2_0.95_cpB.out	-248.233	14_Peptide-MeNH2_1.00_monomerA.out	-248.233	14_Peptide-MeNH2_1.00_monomerB.out	-95.739		7.13255	7.31229	7.22242		7.411	7.379	7.44608		-0.278449	-0.0987145	-0.188582		-0.246449	-0.0667145	-0.156582		-0.313529	-0.133795	-0.223662
14_Peptide-MeNH2_1.00_dimer.out	-343.984	14_Peptide-MeNH2_1.00_cpA.out	-95.7391	14_Peptide-MeNH2_1.00_cpB.out	-248.233	14_Peptide-MeNH2_1.00_monomerA.out	-248.233	14_Peptide-MeNH2_1.00_monomerB.out	-95.739		7.26335	7.41844	7.3409		7.5	7.478	7.53646		-0.236647	-0.0815556	-0.159101		-0.214647	-0.0595556	-0.137101		-0.273103	-0.118012	-0.195557
14_Peptide-MeNH2_1.05_dimer.out	-343.984	14_Peptide-MeNH2_1.05_cpA.out	-95.7391	14_Peptide-MeNH2_1.05_cpB.out	-248.233	14_Peptide-MeNH2_1.00_monomerA.out	-248.233	14_Peptide-MeNH2_1.00_monomerB.out	-95.739		7.1216	7.25645	7.18903		7.324	7.31	7.35958		-0.202398	-0.0675452	-0.134971		-0.188398	-0.0535452	-0.120971		-0.237981	-0.103129	-0.170555
14_Peptide-MeNH2_1.10_dimer.out	-343.983	14_Peptide-MeNH2_1.10_cpA.out	-95.7391	14_Peptide-MeNH2_1.10_cpB.out	-248.233	14_Peptide-MeNH2_1.00_monomerA.out	-248.233	14_Peptide-MeNH2_1.00_monomerB.out	-95.739		6.81237	6.93056	6.87146		6.986	6.978	7.0205		-0.173633	-0.0554413	-0.114537		-0.165633	-0.0474413	-0.106537		-0.208133	-0.0899416	-0.149038
14_Peptide-MeNH2_1.25_dimer.out	-343.981	14_Peptide-MeNH2_1.25_cpA.out	-95.7391	14_Peptide-MeNH2_1.25_cpB.out	-248.233	14_Peptide-MeNH2_1.00_monomerA.out	-248.233	14_Peptide-MeNH2_1.00_monomerB.out	-95.739		5.49332	5.57469	5.534		5.61	5.611	5.63893		-0.116683	-0.0353113	-0.075997		-0.117683	-0.0363113	-0.076997		-0.145615	-0.0642438	-0.10493
14_Peptide-MeNH2_1.50_dimer.out	-343.978	14_Peptide-MeNH2_1.50_cpA.out	-95.739	14_Peptide-MeNH2_1.50_cpB.out	-248.233	14_Peptide-MeNH2_1.00_monomerA.out	-248.233	14_Peptide-MeNH2_1.00_monomerB.out	-95.739		3.46818	3.51371	3.49094		3.549	3.552	3.56734		-0.0808227	-0.0352934	-0.058058		-0.0838227	-0.0382934	-0.061058		-0.0991584	-0.0536292	-0.0763938
14_Peptide-MeNH2_2.00_dimer.out	-343.975	14_Peptide-MeNH2_2.00_cpA.out	-95.739	14_Peptide-MeNH2_2.00_cpB.out	-248.233	14_Peptide-MeNH2_1.00_monomerA.out	-248.233	14_Peptide-MeNH2_1.00_monomerB.out	-95.739		1.44591	1.46334	1.45462		1.488	1.492	1.49832		-0.0420927	-0.0246592	-0.0333759		-0.0460927	-0.0286592	-0.0373759		-0.0524157	-0.0349822	-0.043699
15_Peptide-Peptide_0.90_dimer.out	-496.479	15_Peptide-Peptide_0.90_cpA.out	-248.233	15_Peptide-Peptide_0.90_cpB.out	-248.233	15_Peptide-Peptide_1.00_monomerA.out	-248.233	15_Peptide-Peptide_1.00_monomerB.out	-248.233		7.55316	7.81522	7.68419		8.096	8.085	8.20422		-0.542841	-0.280776	-0.411808		-0.531841	-0.269776	-0.400808		-0.651065	-0.389	-0.520032
15_Peptide-Peptide_0.95_dimer.out	-496.48	15_Peptide-Peptide_0.95_cpA.out	-248.233	15_Peptide-Peptide_0.95_cpB.out	-248.233	15_Peptide-Peptide_1.00_monomerA.out	-248.233	15_Peptide-Peptide_1.00_monomerB.out	-248.233		8.11082	8.34011	8.22547		8.586	8.59	8.69565		-0.475182	-0.245888	-0.360535		-0.479182	-0.249888	-0.364535		-0.584828	-0.355535	-0.470181
15_Peptide-Peptide_1.00_dimer.out	-496.48	15_Peptide-Peptide_1.00_cpA.out	-248.233	15_Peptide-Peptide_1.00_cpB.out	-248.233	15_Peptide-Peptide_1.00_monomerA.out	-248.233	15_Peptide-Peptide_1.00_monomerB.out	-248.233		8.24293	8.44425	8.34359		8.659	8.673	8.76729		-0.416075	-0.214755	-0.315415		-0.430075	-0.228755	-0.329415		-0.524364	-0.323044	-0.423704
15_Peptide-Peptide_1.05_dimer.out	-496.48	15_Peptide-Peptide_1.05_cpA.out	-248.233	15_Peptide-Peptide_1.05_cpB.out	-248.233	15_Peptide-Peptide_1.00_monomerA.out	-248.233	15_Peptide-Peptide_1.00_monomerB.out	-248.233		8.09945	8.27654	8.188		8.464	8.485	8.56864		-0.364545	-0.187462	-0.276004		-0.385545	-0.208462	-0.297004		-0.469186	-0.292103	-0.380645
15_Peptide-Peptide_1.10_dimer.out	-496.479	15_Peptide-Peptide_1.10_cpA.out	-248.233	15_Peptide-Peptide_1.10_cpB.out	-248.233	15_Peptide-Peptide_1.00_monomerA.out	-248.233	15_Peptide-Peptide_1.00_monomerB.out	-248.233		7.78477	7.94074	7.86275		8.105	8.131	8.20436		-0.32023	-0.164263	-0.242246		-0.34623	-0.190263	-0.268246		-0.419589	-0.263622	-0.341605
15_Peptide-Peptide_1.25_dimer.out	-496.477	15_Peptide-Peptide_1.25_cpA.out	-248.233	15_Peptide-Peptide_1.25_cpB.out	-248.233	15_Peptide-Peptide_1.00_monomerA.out	-248.233	15_Peptide-Peptide_1.00_monomerB.out	-248.233		6.42372	6.53259	6.47815		6.649	6.677	6.72825		-0.225282	-0.116414	-0.170848		-0.253282	-0.144414	-0.198848		-0.304534	-0.195666	-0.2501
15_Peptide-Peptide_1.50_dimer.out	-496.473	15_Peptide-Peptide_1.50_cpA.out	-248.233	15_Peptide-Peptide_1.50_cpB.out	-248.233	15_Peptide-Peptide_1.00_monomerA.out	-248.233	15_Peptide-Peptide_1.00_monomerB.out	-248.233		4.26036	4.3251	4.29273		4.407	4.426	4.45655		-0.146644	-0.081902	-0.114273		-0.165644	-0.100902	-0.133273		-0.196197	-0.131456	-0.163827
15_Peptide-Peptide_2.00_dimer.out	-496.469	15_Peptide-Peptide_2.00_cpA.out	-248.233	15_Peptide-Peptide_2.00_cpB.out	-248.233	15_Peptide-Peptide_1.00_monomerA.out	-248.233	15_Peptide-Peptide_1.00_monomerB.out	-248.233		1.71017	1.73133	1.72075		1.775	1.782	1.7925		-0.0648288	-0.0436669	-0.0542479		-0.0718288	-0.0506669	-0.0612479		-0.0823289	-0.0611669	-0.0717479
16_Peptide-Water_0.90_dimer.out	-324.605	16_Peptide-Water_0.90_cpA.out	-76.3642	16_Peptide-Water_0.90_cpB.out	-248.233	16_Peptide-Water_1.00_monomerA.out	-248.233	16_Peptide-Water_1.00_monomerB.out	-76.364		4.50048	4.6558	4.57814		4.761	4.74	4.80144		-0.26052	-0.105201	-0.182861		-0.23952	-0.0842014	-0.161861		-0.300958	-0.145639	-0.223299
16_Peptide-Water_0.95_dimer.out	-324.605	16_Peptide-Water_0.95_cpA.out	-76.3642	16_Peptide-Water_0.95_cpB.out	-248.233	16_Peptide-Water_1.00_monomerA.out	-248.233	16_Peptide-Water_1.00_monomerB.out	-76.364		4.88837	5.02318	4.95577		5.108	5.097	5.15		-0.219633	-0.0848237	-0.152228		-0.208633	-0.0738237	-0.141228		-0.261629	-0.12682	-0.194225
16_Peptide-Water_1.00_dimer.out	-324.605	16_Peptide-Water_1.00_cpA.out	-76.3642	16_Peptide-Water_1.00_cpB.out	-248.233	16_Peptide-Water_1.00_monomerA.out	-248.233	16_Peptide-Water_1.00_monomerB.out	-76.364		4.9638	5.08158	5.02269		5.15	5.146	5.19092		-0.186197	-0.0684227	-0.12731		-0.182197	-0.0644227	-0.12331		-0.22712	-0.109345	-0.168233
16_Peptide-Water_1.05_dimer.out	-324.605	16_Peptide-Water_1.05_cpA.out	-76.3641	16_Peptide-Water_1.05_cpB.out	-248.233	16_Peptide-Water_1.00_monomerA.out	-248.233	16_Peptide-Water_1.00_monomerB.out	-76.364		4.8476	4.95087	4.89924		5.005	5.006	5.04427		-0.1574	-0.0541294	-0.105765		-0.1584	-0.0551294	-0.106765		-0.196674	-0.0934037	-0.145039
16_Peptide-Water_1.10_dimer.out	-324.605	16_Peptide-Water_1.10_cpA.out	-76.3641	16_Peptide-Water_1.10_cpB.out	-248.233	16_Peptide-Water_1.00_monomerA.out	-248.233	16_Peptide-Water_1.00_monomerB.out	-76.364		4.61949	4.71039	4.66494		4.754	4.758	4.79049		-0.134509	-0.0436101	-0.0890598		-0.138509	-0.0476101	-0.0930598		-0.171002	-0.0801027	-0.125552
16_Peptide-Water_1.25_dimer.out	-324.603	16_Peptide-Water_1.25_cpA.out	-76.3641	16_Peptide-Water_1.25_cpB.out	-248.233	16_Peptide-Water_1.00_monomerA.out	-248.233	16_Peptide-Water_1.00_monomerB.out	-76.364		3.70778	3.77198	3.73988		3.799	3.805	3.82538		-0.091219	-0.0270208	-0.0591199		-0.097219	-0.0330208	-0.0651199		-0.117603	-0.0534052	-0.0855043
16_Peptide-Water_1.50_dimer.out	-324.601	16_Peptide-Water_1.50_cpA.out	-76.3641	16_Peptide-Water_1.50_cpB.out	-248.233	16_Peptide-Water_1.00_monomerA.out	-248.233	16_Peptide-Water_1.00_monomerB.out	-76.364		2.39158	2.43077	2.41118		2.454	2.458	2.46807		-0.0624161	-0.0232276	-0.0428219		-0.0664161	-0.0272276	-0.0468219		-0.0764902	-0.0373016	-0.0568959
16_Peptide-Water_2.00_dimer.out	-324.599	16_Peptide-Water_2.00_cpA.out	-76.3641	16_Peptide-Water_2.00_cpB.out	-248.233	16_Peptide-Water_1.00_monomerA.out	-248.233	16_Peptide-Water_1.00_monomerB.out	-76.364		1.11065	1.12838	1.11951		1.137	1.136	1.13891		-0.0263535	-0.00862014	-0.0174868		-0.0253535	-0.00762014	-0.0164868		-0.0282604	-0.010527	-0.0193937
17_Uracil-Uracil_BP_0.90_dimer.out	-828.746	17_Uracil-Uracil_BP_0.90_cpA.out	-414.361	17_Uracil-Uracil_BP_0.90_cpB.out	-414.361	17_Uracil-Uracil_BP_1.00_monomerA.out	-414.361	17_Uracil-Uracil_BP_1.00_monomerB.out	-414.361		15.0853	15.5406	15.3129		16.066	16.042	16.2292		-0.980683	-0.525444	-0.753063		-0.956683	-0.501444	-0.729063		-1.14385	-0.688608	-0.916228
17_Uracil-Uracil_BP_0.95_dimer.out	-828.748	17_Uracil-Uracil_BP_0.95_cpA.out	-414.361	17_Uracil-Uracil_BP_0.95_cpB.out	-414.361	17_Uracil-Uracil_BP_1.00_monomerA.out	-414.361	17_Uracil-Uracil_BP_1.00_monomerB.out	-414.361		16.3222	16.7169	16.5195		17.187	17.19	17.3585		-0.864834	-0.470091	-0.667462		-0.867834	-0.473091	-0.670462		-1.03631	-0.641565	-0.838936
17_Uracil-Uracil_BP_1.00_dimer.out	-828.748	17_Uracil-Uracil_BP_1.00_cpA.out	-414.361	17_Uracil-Uracil_BP_1.00_cpB.out	-414.361	17_Uracil-Uracil_BP_1.00_monomerA.out	-414.361	17_Uracil-Uracil_BP_1.00_monomerB.out	-414.361		16.6449	16.9904	16.8177		17.405	17.432	17.583		-0.760114	-0.414573	-0.587343		-0.787114	-0.441573	-0.614343		-0.938156	-0.592616	-0.765386
17_Uracil-Uracil_BP_1.05_dimer.out	-828.748	17_Uracil-Uracil_BP_1.05_cpA.out	-414.361	17_Uracil-Uracil_BP_1.05_cpB.out	-414.361	17_Uracil-Uracil_BP_1.00_monomerA.out	-414.361	17_Uracil-Uracil_BP_1.00_monomerB.out	-414.361		16.367	16.6693	16.5181		17.034	17.078	17.2136		-0.667026	-0.364713	-0.515869		-0.711026	-0.408713	-0.559869		-0.846606	-0.544293	-0.69545
17_Uracil-Uracil_BP_1.10_dimer.out	-828.747	17_Uracil-Uracil_BP_1.10_cpA.out	-414.361	17_Uracil-Uracil_BP_1.10_cpB.out	-414.361	17_Uracil-Uracil_BP_1.00_monomerA.out	-414.361	17_Uracil-Uracil_BP_1.00_monomerB.out	-414.361		15.7108	15.9771	15.844		16.293	16.352	16.4732		-0.582183	-0.315881	-0.449032		-0.641183	-0.374881	-0.508032		-0.762365	-0.496063	-0.629214
17_Uracil-Uracil_BP_1.25_dimer.out	-828.742	17_Uracil-Uracil_BP_1.25_cpA.out	-414.361	17_Uracil-Uracil_BP_1.25_cpB.out	-414.361	17_Uracil-Uracil_BP_1.00_monomerA.out	-414.361	17_Uracil-Uracil_BP_1.00_monomerB.out	-414.361		12.7982	12.982	12.8901		13.19	13.263	13.3496		-0.391822	-0.207971	-0.299897		-0.464822	-0.280971	-0.372897		-0.551437	-0.367586	-0.459511
17_Uracil-Uracil_BP_1.50_dimer.out	-828.734	17_Uracil-Uracil_BP_1.50_cpA.out	-414.361	17_Uracil-Uracil_BP_1.50_cpB.out	-414.361	17_Uracil-Uracil_BP_1.00_monomerA.out	-414.361	17_Uracil-Uracil_BP_1.00_monomerB.out	-414.361		8.13086	8.24043	8.18564		8.357	8.41	8.46175		-0.226145	-0.116574	-0.171359		-0.279145	-0.169574	-0.224359		-0.330891	-0.22132	-0.276106
17_Uracil-Uracil_BP_2.00_dimer.out	-828.727	17_Uracil-Uracil_BP_2.00_cpA.out	-414.361	17_Uracil-Uracil_BP_2.00_cpB.out	-414.361	17_Uracil-Uracil_BP_1.00_monomerA.out	-414.361	17_Uracil-Uracil_BP_1.00_monomerB.out	-414.361		3.22766	3.27228	3.24997		3.337	3.357	3.38004		-0.109342	-0.064716	-0.0870292		-0.129342	-0.084716	-0.107029		-0.152381	-0.107754	-0.130068
18_Water-Pyridine_0.90_dimer.out	-324.323	18_Water-Pyridine_0.90_cpA.out	-247.949	18_Water-Pyridine_0.90_cpB.out	-76.3641	18_Water-Pyridine_1.00_monomerA.out	-76.3639	18_Water-Pyridine_1.00_monomerB.out	-247.949		6.53081	6.73714	6.63397		6.484	6.453	6.52673		0.0468064	0.253138	0.149972		0.0778064	0.284138	0.180972		0.00407615	0.210408	0.107242
18_Water-Pyridine_0.95_dimer.out	-324.324	18_Water-Pyridine_0.95_cpA.out	-247.949	18_Water-Pyridine_0.95_cpB.out	-76.3641	18_Water-Pyridine_1.00_monomerA.out	-76.3639	18_Water-Pyridine_1.00_monomerB.out	-247.949		6.92189	7.09986	7.01088		6.87	6.853	6.91751		0.0518885	0.229864	0.140876		0.0688885	0.246864	0.157876		0.00438316	0.182358	0.0933708
18_Water-Pyridine_1.00_dimer.out	-324.324	18_Water-Pyridine_1.00_cpA.out	-247.949	18_Water-Pyridine_1.00_cpB.out	-76.364	18_Water-Pyridine_1.00_monomerA.out	-76.3639	18_Water-Pyridine_1.00_monomerB.out	-247.949		6.93295	7.08704	7.00999		6.879	6.872	6.92808		0.0539454	0.208041	0.130993		0.0609454	0.215041	0.137993		0.00486924	0.158964	0.0819168
18_Water-Pyridine_1.05_dimer.out	-324.324	18_Water-Pyridine_1.05_cpA.out	-247.949	18_Water-Pyridine_1.05_cpB.out	-76.364	18_Water-Pyridine_1.00_monomerA.out	-76.3639	18_Water-Pyridine_1.00_monomerB.out	-247.949		6.70681	6.84075	6.77378		6.653	6.653	6.70133		0.0538086	0.187753	0.120781		0.0538086	0.187753	0.120781		0.00548235	0.139427	0.0724547
18_Water-Pyridine_1.10_dimer.out	-324.323	18_Water-Pyridine_1.10_cpA.out	-247.949	18_Water-Pyridine_1.10_cpB.out	-76.364	18_Water-Pyridine_1.00_monomerA.out	-76.3639	18_Water-Pyridine_1.00_monomerB.out	-247.949		6.34157	6.45861	6.40009		6.289	6.294	6.33583		0.0525651	0.169614	0.11109		0.0475651	0.164614	0.10609		0.00573859	0.122788	0.0642631
18_Water-Pyridine_1.25_dimer.out	-324.321	18_Water-Pyridine_1.25_cpA.out	-247.949	18_Water-Pyridine_1.25_cpB.out	-76.364	18_Water-Pyridine_1.00_monomerA.out	-76.3639	18_Water-Pyridine_1.00_monomerB.out	-247.949		4.96709	5.04772	5.0074		4.929	4.939	4.96488		0.0380864	0.118717	0.0784018		0.0280864	0.108717	0.0684018		0.00220267	0.0828335	0.0425181
18_Water-Pyridine_1.50_dimer.out	-324.318	18_Water-Pyridine_1.50_cpA.out	-247.949	18_Water-Pyridine_1.50_cpB.out	-76.3639	18_Water-Pyridine_1.00_monomerA.out	-76.3639	18_Water-Pyridine_1.00_monomerB.out	-247.949		3.01295	3.06058	3.03677		3.006	3.013	3.02649		0.00695096	0.0545796	0.0307653		-4.90406e-05	0.0475796	0.0237653		-0.0135342	0.0340944	0.0102801
18_Water-Pyridine_2.00_dimer.out	-324.315	18_Water-Pyridine_2.00_cpA.out	-247.949	18_Water-Pyridine_2.00_cpB.out	-76.3639	18_Water-Pyridine_1.00_monomerA.out	-76.3639	18_Water-Pyridine_1.00_monomerB.out	-247.949		1.17375	1.19272	1.18324		1.184	1.189	1.19491		-0.0102463	0.00872473	-0.000760806		-0.0152463	0.00372473	-0.00576081		-0.0211536	-0.00218257	-0.0116681
19_MeOH-Pyridine_0.90_dimer.out	-363.56	19_MeOH-Pyridine_0.90_cpA.out	-247.949	19_MeOH-Pyridine_0.90_cpB.out	-115.6	19_MeOH-Pyridine_1.00_monomerA.out	-115.6	19_MeOH-Pyridine_1.00_monomerB.out	-247.949		6.77333	7.00273	6.88803		6.876	6.855	6.94443		-0.102667	0.126731	0.0120322		-0.0816669	0.147731	0.0330322		-0.171097	0.0583017	-0.0563974
19_MeOH-Pyridine_0.95_dimer.out	-363.561	19_MeOH-Pyridine_0.95_cpA.out	-247.949	19_MeOH-Pyridine_0.95_cpB.out	-115.6	19_MeOH-Pyridine_1.00_monomerA.out	-115.6	19_MeOH-Pyridine_1.00_monomerB.out	-247.949		7.29083	7.48893	7.38988		7.374	7.366	7.44547		-0.0831708	0.114933	0.0158813		-0.0751708	0.122933	0.0238813		-0.154641	0.0434636	-0.0555886
19_MeOH-Pyridine_1.00_dimer.out	-363.561	19_MeOH-Pyridine_1.00_cpA.out	-247.949	19_MeOH-Pyridine_1.00_cpB.out	-115.6	19_MeOH-Pyridine_1.00_monomerA.out	-115.6	19_MeOH-Pyridine_1.00_monomerB.out	-247.949		7.38129	7.55313	7.46721		7.448	7.451	7.52025		-0.0667135	0.105128	0.0192071		-0.0697135	0.102128	0.0162071		-0.138964	0.032877	-0.0530436
19_MeOH-Pyridine_1.05_dimer.out	-363.56	19_MeOH-Pyridine_1.05_cpA.out	-247.949	19_MeOH-Pyridine_1.05_cpB.out	-115.6	19_MeOH-Pyridine_1.00_monomerA.out	-115.6	19_MeOH-Pyridine_1.00_monomerB.out	-247.949		7.1995	7.34909	7.27429		7.253	7.263	7.32365		-0.0535036	0.0960883	0.0212924		-0.0635036	0.0860883	0.0112924		-0.124153	0.0254385	-0.0493575
19_MeOH-Pyridine_1.10_dimer.out	-363.56	19_MeOH-Pyridine_1.10_cpA.out	-247.949	19_MeOH-Pyridine_1.10_cpB.out	-115.6	19_MeOH-Pyridine_1.00_monomerA.out	-115.6	19_MeOH-Pyridine_1.00_monomerB.out	-247.949		6.85302	6.98379	6.9184		6.897	6.911	6.96348		-0.0439793	0.0867855	0.0214031		-0.0579793	0.0727855	0.00740311		-0.110457	0.0203079	-0.0450746
19_MeOH-Pyridine_1.25_dimer.out	-363.557	19_MeOH-Pyridine_1.25_cpA.out	-247.949	19_MeOH-Pyridine_1.25_cpB.out	-115.6	19_MeOH-Pyridine_1.00_monomerA.out	-115.6	19_MeOH-Pyridine_1.00_monomerB.out	-247.949		5.44536	5.53481	5.49008		5.473	5.49	5.52459		-0.0276402	0.0618099	0.0170849		-0.0446402	0.0448099	8.48537e-05		-0.07923	0.0102202	-0.0345049
19_MeOH-Pyridine_1.50_dimer.out	-363.554	19_MeOH-Pyridine_1.50_cpA.out	-247.949	19_MeOH-Pyridine_1.50_cpB.out	-115.6	19_MeOH-Pyridine_1.00_monomerA.out	-115.6	19_MeOH-Pyridine_1.00_monomerB.out	-247.949		3.34603	3.39789	3.37196		3.373	3.385	3.40319		-0.0269733	0.024889	-0.00104213		-0.0389733	0.012889	-0.0130421		-0.0571596	-0.00529725	-0.0312284
19_MeOH-Pyridine_2.00_dimer.out	-363.551	19_MeOH-Pyridine_2.00_cpA.out	-247.949	19_MeOH-Pyridine_2.00_cpB.out	-115.6	19_MeOH-Pyridine_1.00_monomerA.out	-115.6	19_MeOH-Pyridine_1.00_monomerB.out	-247.949		1.30643	1.32687	1.31665		1.328	1.336	1.34347		-0.0215734	-0.00113058	-0.011352		-0.0295734	-0.00913058	-0.019352		-0.0370392	-0.0165963	-0.0268177
20_AcOH-AcOH_0.90_dimer.out	-457.725	20_AcOH-AcOH_0.90_cpA.out	-228.849	20_AcOH-AcOH_0.90_cpB.out	-228.849	20_AcOH-AcOH_1.00_monomerA.out	-228.849	20_AcOH-AcOH_1.00_monomerB.out	-228.849		17.3056	17.7669	17.5363		17.925	17.793	17.9699		-0.619381	-0.158071	-0.388726		-0.487381	-0.0260711	-0.256726		-0.664248	-0.202938	-0.433593
20_AcOH-AcOH_0.95_dimer.out	-457.728	20_AcOH-AcOH_0.95_cpA.out	-228.849	20_AcOH-AcOH_0.95_cpB.out	-228.849	20_AcOH-AcOH_1.00_monomerA.out	-228.849	20_AcOH-AcOH_1.00_monomerB.out	-228.849		18.6396	19.0259	18.8327		19.17	19.07	19.2277		-0.530378	-0.144142	-0.33726		-0.430378	-0.0441419	-0.23726		-0.58812	-0.201884	-0.395002
20_AcOH-AcOH_1.00_dimer.out	-457.728	20_AcOH-AcOH_1.00_cpA.out	-228.849	20_AcOH-AcOH_1.00_cpB.out	-228.849	20_AcOH-AcOH_1.00_monomerA.out	-228.849	20_AcOH-AcOH_1.00_monomerB.out	-228.849		18.9433	19.2704	19.1068		19.397	19.328	19.4687		-0.453725	-0.126649	-0.290187		-0.384725	-0.0576494	-0.221187		-0.525469	-0.198393	-0.361931
20_AcOH-AcOH_1.05_dimer.out	-457.727	20_AcOH-AcOH_1.05_cpA.out	-228.849	20_AcOH-AcOH_1.05_cpB.out	-228.849	20_AcOH-AcOH_1.00_monomerA.out	-228.849	20_AcOH-AcOH_1.00_monomerB.out	-228.849		18.5791	18.8584	18.7187		18.965	18.923	19.0493		-0.385881	-0.10662	-0.24625		-0.343881	-0.0646203	-0.20425		-0.470201	-0.19094	-0.33057
20_AcOH-AcOH_1.10_dimer.out	-457.726	20_AcOH-AcOH_1.10_cpA.out	-228.849	20_AcOH-AcOH_1.10_cpB.out	-228.849	20_AcOH-AcOH_1.00_monomerA.out	-228.849	20_AcOH-AcOH_1.00_monomerB.out	-228.849		17.7991	18.039	17.919		18.125	18.106	18.2195		-0.325932	-0.0859763	-0.205954		-0.306932	-0.0669763	-0.186954		-0.420407	-0.18045	-0.300428
20_AcOH-AcOH_1.25_dimer.out	-457.72	20_AcOH-AcOH_1.25_cpA.out	-228.849	20_AcOH-AcOH_1.25_cpB.out	-228.849	20_AcOH-AcOH_1.00_monomerA.out	-228.849	20_AcOH-AcOH_1.00_monomerB.out	-228.849		14.4408	14.5976	14.5192		14.635	14.657	14.7358		-0.194228	-0.0373726	-0.1158		-0.216228	-0.0593726	-0.1378		-0.29505	-0.138195	-0.216623
20_AcOH-AcOH_1.50_dimer.out	-457.712	20_AcOH-AcOH_1.50_cpA.out	-228.849	20_AcOH-AcOH_1.50_cpB.out	-228.849	20_AcOH-AcOH_1.00_monomerA.out	-228.849	20_AcOH-AcOH_1.00_monomerB.out	-228.849		9.12627	9.21024	9.16825		9.219	9.246	9.2885		-0.0927332	-0.00876238	-0.0507478		-0.119733	-0.0357624	-0.0777478		-0.162237	-0.0782665	-0.120252
20_AcOH-AcOH_2.00_dimer.out	-457.703	20_AcOH-AcOH_2.00_cpA.out	-228.849	20_AcOH-AcOH_2.00_cpB.out	-228.849	20_AcOH-AcOH_1.00_monomerA.out	-228.849	20_AcOH-AcOH_1.00_monomerB.out	-228.849		3.53712	3.56863	3.55287		3.594	3.595	3.61056		-0.056881	-0.0253719	-0.0411265		-0.057881	-0.0263719	-0.0421265		-0.0734439	-0.0419347	-0.0576893
21_AcNH2-AcNH2_0.90_dimer.out	-417.989	21_AcNH2-AcNH2_0.90_cpA.out	-208.983	21_AcNH2-AcNH2_0.90_cpB.out	-208.983	21_AcNH2-AcNH2_1.00_monomerA.out	-208.982	21_AcNH2-AcNH2_1.00_monomerB.out	-208.982		14.5319	14.8773	14.7046		15.274	15.185	15.3351		-0.742085	-0.396677	-0.569381		-0.653085	-0.307677	-0.480381		-0.803234	-0.457825	-0.630529
21_AcNH2-AcNH2_0.95_dimer.out	-417.99	21_AcNH2-AcNH2_0.95_cpA.out	-208.983	21_AcNH2-AcNH2_0.95_cpB.out	-208.983	21_AcNH2-AcNH2_1.00_monomerA.out	-208.982	21_AcNH2-AcNH2_1.00_monomerB.out	-208.982		15.6621	15.955	15.8086		16.299	16.242	16.375		-0.636903	-0.343992	-0.490448		-0.579903	-0.286992	-0.433448		-0.712936	-0.420026	-0.566481
21_AcNH2-AcNH2_1.00_dimer.out	-417.991	21_AcNH2-AcNH2_1.00_cpA.out	-208.983	21_AcNH2-AcNH2_1.00_cpB.out	-208.983	21_AcNH2-AcNH2_1.00_monomerA.out	-208.982	21_AcNH2-AcNH2_1.00_monomerB.out	-208.982		15.9278	16.1777	16.0527		16.472	16.441	16.5588		-0.544233	-0.29434	-0.419286		-0.513233	-0.26334	-0.388286		-0.630985	-0.381092	-0.506038
21_AcNH2-AcNH2_1.05_dimer.out	-417.99	21_AcNH2-AcNH2_1.05_cpA.out	-208.983	21_AcNH2-AcNH2_1.05_cpB.out	-208.983	21_AcNH2-AcNH2_1.00_monomerA.out	-208.982	21_AcNH2-AcNH2_1.00_monomerB.out	-208.982		15.6319	15.8462	15.7391		16.094	16.085	16.1883		-0.462059	-0.247795	-0.354927		-0.453059	-0.238795	-0.345927		-0.556349	-0.342085	-0.449217
21_AcNH2-AcNH2_1.10_dimer.out	-417.989	21_AcNH2-AcNH2_1.10_cpA.out	-208.983	21_AcNH2-AcNH2_1.10_cpB.out	-208.983	21_AcNH2-AcNH2_1.00_monomerA.out	-208.982	21_AcNH2-AcNH2_1.00_monomerB.out	-208.982		14.9884	15.1724	15.0804		15.38	15.386	15.4764		-0.391561	-0.207561	-0.299561		-0.397561	-0.213561	-0.305561		-0.487927	-0.303927	-0.395927
21_AcNH2-AcNH2_1.25_dimer.out	-417.985	21_AcNH2-AcNH2_1.25_cpA.out	-208.983	21_AcNH2-AcNH2_1.25_cpB.out	-208.983	21_AcNH2-AcNH2_1.00_monomerA.out	-208.982	21_AcNH2-AcNH2_1.00_monomerB.out	-208.982		12.2191	12.338	12.2786		12.46	12.485	12.5444		-0.240917	-0.121958	-0.181437		-0.265917	-0.146958	-0.206437		-0.325342	-0.206383	-0.265863
21_AcNH2-AcNH2_1.50_dimer.out	-417.978	21_AcNH2-AcNH2_1.50_cpA.out	-208.983	21_AcNH2-AcNH2_1.50_cpB.out	-208.983	21_AcNH2-AcNH2_1.00_monomerA.out	-208.982	21_AcNH2-AcNH2_1.00_monomerB.out	-208.982		7.87717	7.94092	7.90905		8.007	8.022	8.05386		-0.129828	-0.0660782	-0.0979533		-0.144828	-0.0810782	-0.112953		-0.17669	-0.11294	-0.144815
21_AcNH2-AcNH2_2.00_dimer.out	-417.97	21_AcNH2-AcNH2_2.00_cpA.out	-208.983	21_AcNH2-AcNH2_2.00_cpB.out	-208.983	21_AcNH2-AcNH2_1.00_monomerA.out	-208.982	21_AcNH2-AcNH2_1.00_monomerB.out	-208.982		2.947	2.96726	2.95713		3.008	3.009	3.01978		-0.0609998	-0.0407368	-0.0508683		-0.0619998	-0.0417368	-0.0518683		-0.0727805	-0.0525175	-0.062649
22_AcOH-Uracil_0.90_dimer.out	-643.238	22_AcOH-Uracil_0.90_cpA.out	-414.361	22_AcOH-Uracil_0.90_cpB.out	-228.849	22_AcOH-Uracil_1.00_monomerA.out	-228.849	22_AcOH-Uracil_1.00_monomerB.out	-414.36		17.4864	17.9438	17.7151		18.324	18.241	18.421		-0.837613	-0.380224	-0.608918		-0.754613	-0.297224	-0.525918		-0.934586	-0.477196	-0.705891
22_AcOH-Uracil_0.95_dimer.out	-643.24	22_AcOH-Uracil_0.95_cpA.out	-414.361	22_AcOH-Uracil_0.95_cpB.out	-228.849	22_AcOH-Uracil_1.00_monomerA.out	-228.849	22_AcOH-Uracil_1.00_monomerB.out	-414.36		18.7883	19.1792	18.9838		19.524	19.47	19.6319		-0.735725	-0.344772	-0.540249		-0.681725	-0.290772	-0.486249		-0.84366	-0.452706	-0.648183
22_AcOH-Uracil_1.00_dimer.out	-643.24	22_AcOH-Uracil_1.00_cpA.out	-414.361	22_AcOH-Uracil_1.00_cpB.out	-228.849	22_AcOH-Uracil_1.00_monomerA.out	-228.849	22_AcOH-Uracil_1.00_monomerB.out	-414.36		19.114	19.4514	19.2827		19.759	19.732	19.8775		-0.644982	-0.307605	-0.476293		-0.617982	-0.280605	-0.449293		-0.763442	-0.426064	-0.594753
22_AcOH-Uracil_1.05_dimer.out	-643.239	22_AcOH-Uracil_1.05_cpA.out	-414.361	22_AcOH-Uracil_1.05_cpB.out	-228.849	22_AcOH-Uracil_1.00_monomerA.out	-228.849	22_AcOH-Uracil_1.00_monomerB.out	-414.36		18.7979	19.0905	18.9442		19.361	19.358	19.4881		-0.563075	-0.270509	-0.416792		-0.560075	-0.267509	-0.413792		-0.690136	-0.397571	-0.543853
22_AcOH-Uracil_1.10_dimer.out	-643.238	22_AcOH-Uracil_1.10_cpA.out	-414.361	22_AcOH-Uracil_1.10_cpB.out	-228.849	22_AcOH-Uracil_1.00_monomerA.out	-228.849	22_AcOH-Uracil_1.00_monomerB.out	-414.36		18.075	18.3299	18.2024		18.565	18.581	18.6975		-0.490005	-0.235097	-0.362551		-0.506005	-0.251097	-0.378551		-0.622472	-0.367565	-0.495019
22_AcOH-Uracil_1.25_dimer.out	-643.233	22_AcOH-Uracil_1.25_cpA.out	-414.361	22_AcOH-Uracil_1.25_cpB.out	-228.849	22_AcOH-Uracil_1.00_monomerA.out	-228.849	22_AcOH-Uracil_1.00_monomerB.out	-414.36		14.8745	15.0464	14.9605		15.198	15.243	15.3249		-0.323536	-0.151556	-0.237546		-0.368536	-0.196556	-0.282546		-0.450406	-0.278427	-0.364417
22_AcOH-Uracil_1.50_dimer.out	-643.225	22_AcOH-Uracil_1.50_cpA.out	-414.361	22_AcOH-Uracil_1.50_cpB.out	-228.849	22_AcOH-Uracil_1.00_monomerA.out	-228.849	22_AcOH-Uracil_1.00_monomerB.out	-414.36		9.68504	9.78249	9.73376		9.867	9.907	9.95316		-0.181961	-0.084511	-0.133236		-0.221961	-0.124511	-0.173236		-0.268125	-0.170675	-0.2194
22_AcOH-Uracil_2.00_dimer.out	-643.215	22_AcOH-Uracil_2.00_cpA.out	-414.36	22_AcOH-Uracil_2.00_cpB.out	-228.849	22_AcOH-Uracil_1.00_monomerA.out	-228.849	22_AcOH-Uracil_1.00_monomerB.out	-414.36		4.05108	4.08963	4.07035		4.15	4.161	4.17934		-0.0989238	-0.0603749	-0.0796493		-0.109924	-0.0713749	-0.0906493		-0.128262	-0.0897134	-0.108988
23_AcNH2-Uracil_0.90_dimer.out	-623.371	23_AcNH2-Uracil_0.90_cpA.out	-414.361	23_AcNH2-Uracil_0.90_cpB.out	-208.983	23_AcNH2-Uracil_1.00_monomerA.out	-208.982	23_AcNH2-Uracil_1.00_monomerB.out	-414.36		17.1814	17.5927	17.3871		18.076	18.011	18.1824		-0.894603	-0.483285	-0.688944		-0.829603	-0.418285	-0.623944		-1.001	-0.589678	-0.795337
23_AcNH2-Uracil_0.95_dimer.out	-623.373	23_AcNH2-Uracil_0.95_cpA.out	-414.361	23_AcNH2-Uracil_0.95_cpB.out	-208.983	23_AcNH2-Uracil_1.00_monomerA.out	-208.982	23_AcNH2-Uracil_1.00_monomerB.out	-414.36		18.4067	18.7605	18.5836		19.195	19.157	19.3101		-0.788279	-0.43446	-0.61137		-0.750279	-0.39646	-0.57337		-0.903423	-0.549603	-0.726513
23_AcNH2-Uracil_1.00_dimer.out	-623.373	23_AcNH2-Uracil_1.00_cpA.out	-414.361	23_AcNH2-Uracil_1.00_cpB.out	-208.983	23_AcNH2-Uracil_1.00_monomerA.out	-208.982	23_AcNH2-Uracil_1.00_monomerB.out	-414.36		18.7421	19.0485	18.8953		19.432	19.419	19.5567		-0.689906	-0.383487	-0.536697		-0.676906	-0.370487	-0.523697		-0.81459	-0.508171	-0.661381
23_AcNH2-Uracil_1.05_dimer.out	-623.373	23_AcNH2-Uracil_1.05_cpA.out	-414.361	23_AcNH2-Uracil_1.05_cpB.out	-208.983	23_AcNH2-Uracil_1.00_monomerA.out	-208.982	23_AcNH2-Uracil_1.00_monomerB.out	-414.36		18.4833	18.7503	18.6168		19.086	19.094	19.2169		-0.602712	-0.33572	-0.469216		-0.610712	-0.34372	-0.477216		-0.733623	-0.466631	-0.600127
23_AcNH2-Uracil_1.10_dimer.out	-623.372	23_AcNH2-Uracil_1.10_cpA.out	-414.36	23_AcNH2-Uracil_1.10_cpB.out	-208.983	23_AcNH2-Uracil_1.00_monomerA.out	-208.982	23_AcNH2-Uracil_1.00_monomerB.out	-414.36		17.842	18.0756	17.9588		18.367	18.391	18.501		-0.524961	-0.291371	-0.408166		-0.548961	-0.315371	-0.432166		-0.659007	-0.425416	-0.542211
23_AcNH2-Uracil_1.25_dimer.out	-623.367	23_AcNH2-Uracil_1.25_cpA.out	-414.36	23_AcNH2-Uracil_1.25_cpB.out	-208.983	23_AcNH2-Uracil_1.00_monomerA.out	-208.982	23_AcNH2-Uracil_1.00_monomerB.out	-414.36		14.9129	15.0716	14.9922		15.265	15.309	15.3858		-0.352127	-0.193405	-0.272766		-0.396127	-0.237405	-0.316766		-0.472946	-0.314223	-0.393584
23_AcNH2-Uracil_1.50_dimer.out	-623.359	23_AcNH2-Uracil_1.50_cpA.out	-414.36	23_AcNH2-Uracil_1.50_cpB.out	-208.982	23_AcNH2-Uracil_1.00_monomerA.out	-208.982	23_AcNH2-Uracil_1.00_monomerB.out	-414.36		10.0384	10.1296	10.084		10.24	10.276	10.3196		-0.20162	-0.110405	-0.156013		-0.23762	-0.146405	-0.192013		-0.281192	-0.189978	-0.235585
23_AcNH2-Uracil_2.00_dimer.out	-623.35	23_AcNH2-Uracil_2.00_cpA.out	-414.36	23_AcNH2-Uracil_2.00_cpB.out	-208.982	23_AcNH2-Uracil_1.00_monomerA.out	-208.982	23_AcNH2-Uracil_1.00_monomerB.out	-414.36		4.55471	4.5904	4.57256		4.662	4.672	4.69061		-0.10729	-0.0715986	-0.0894443		-0.11729	-0.0815986	-0.0994443		-0.135897	-0.100205	-0.118051
24_Benzene-Benzene_pi-pi_0.90_dimer.out	-463.838	24_Benzene-Benzene_pi-pi_0.90_cpA.out	-231.919	24_Benzene-Benzene_pi-pi_0.90_cpB.out	-231.919	24_Benzene-Benzene_pi-pi_1.00_monomerA.out	-231.918	24_Benzene-Benzene_pi-pi_1.00_monomerB.out	-231.918		-0.0677983	0.373307	0.152754		-0.138	0.03	0.105376		0.0702017	0.511307	0.290754		-0.0977983	0.343307	0.122754		-0.173174	0.267931	0.0473781
24_Benzene-Benzene_pi-pi_0.95_dimer.out	-463.841	24_Benzene-Benzene_pi-pi_0.95_cpA.out	-231.919	24_Benzene-Benzene_pi-pi_0.95_cpB.out	-231.919	24_Benzene-Benzene_pi-pi_1.00_monomerA.out	-231.918	24_Benzene-Benzene_pi-pi_1.00_monomerB.out	-231.918		1.841	2.20225	2.02163		1.791	1.905	2.01598		0.0499983	0.411255	0.230627		-0.0640017	0.297255	0.116627		-0.174983	0.186273	0.00564493
24_Benzene-Benzene_pi-pi_1.00_dimer.out	-463.842	24_Benzene-Benzene_pi-pi_1.00_cpA.out	-231.919	24_Benzene-Benzene_pi-pi_1.00_cpB.out	-231.919	24_Benzene-Benzene_pi-pi_1.00_monomerA.out	-231.918	24_Benzene-Benzene_pi-pi_1.00_monomerB.out	-231.918		2.55291	2.85048	2.7017		2.521	2.634	2.72488		0.0319145	0.329483	0.180699		-0.0810855	0.216483	0.0676986		-0.171964	0.125604	-0.02318
24_Benzene-Benzene_pi-pi_1.05_dimer.out	-463.842	24_Benzene-Benzene_pi-pi_1.05_cpA.out	-231.919	24_Benzene-Benzene_pi-pi_1.05_cpB.out	-231.919	24_Benzene-Benzene_pi-pi_1.00_monomerA.out	-231.918	24_Benzene-Benzene_pi-pi_1.00_monomerB.out	-231.918		2.64715	2.89508	2.77112		2.633	2.739	2.81335		0.0141511	0.262082	0.138117		-0.0918489	0.156082	0.0321167		-0.166194	0.0817369	-0.0422286
24_Benzene-Benzene_pi-pi_1.10_dimer.out	-463.841	24_Benzene-Benzene_pi-pi_1.10_cpA.out	-231.919	24_Benzene-Benzene_pi-pi_1.10_cpB.out	-231.919	24_Benzene-Benzene_pi-pi_1.00_monomerA.out	-231.918	24_Benzene-Benzene_pi-pi_1.00_monomerB.out	-231.918		2.44703	2.65116	2.5491		2.45	2.546	2.60708		-0.00296609	0.201156	0.0990951		-0.0989661	0.105156	0.00309507		-0.160048	0.0440739	-0.0579872
24_Benzene-Benzene_pi-pi_1.25_dimer.out	-463.839	24_Benzene-Benzene_pi-pi_1.25_cpA.out	-231.919	24_Benzene-Benzene_pi-pi_1.25_cpB.out	-231.919	24_Benzene-Benzene_pi-pi_1.00_monomerA.out	-231.918	24_Benzene-Benzene_pi-pi_1.00_monomerB.out	-231.918		1.43942	1.55501	1.49721		1.479	1.543	1.57756		-0.0395842	0.0760136	0.0182147		-0.103584	0.0120136	-0.0457853		-0.138146	-0.0225482	-0.0803471
24_Benzene-Benzene_pi-pi_1.50_dimer.out	-463.838	24_Benzene-Benzene_pi-pi_1.50_cpA.out	-231.919	24_Benzene-Benzene_pi-pi_1.50_cpB.out	-231.919	24_Benzene-Benzene_pi-pi_1.00_monomerA.out	-231.918	24_Benzene-Benzene_pi-pi_1.00_monomerB.out	-231.918		0.428452	0.478469	0.45346		0.468	0.499	0.515145		-0.039548	0.0104686	-0.0145397		-0.070548	-0.0205314	-0.0455397		-0.0866933	-0.0366767	-0.061685
24_Benzene-Benzene_pi-pi_2.00_dimer.out	-463.837	24_Benzene-Benzene_pi-pi_2.00_cpA.out	-231.919	24_Benzene-Benzene_pi-pi_2.00_cpB.out	-231.919	24_Benzene-Benzene_pi-pi_1.00_monomerA.out	-231.918	24_Benzene-Benzene_pi-pi_1.00_monomerB.out	-231.918		0.0543267	0.0658793	0.060103		0.059	0.067	0.0718033		-0.0046733	0.00687925	0.00110297		-0.0126733	-0.00112075	-0.00689703		-0.0174766	-0.00592405	-0.0117003
25_Pyridine-Pyridine_pi-pi_0.90_dimer.out	-495.9	25_Pyridine-Pyridine_pi-pi_0.90_cpA.out	-247.949	25_Pyridine-Pyridine_pi-pi_0.90_cpB.out	-247.949	25_Pyridine-Pyridine_pi-pi_1.00_monomerA.out	-247.949	25_Pyridine-Pyridine_pi-pi_1.00_monomerB.out	-247.949		1.08771	1.53806	1.31289		0.964	1.063	1.20095		0.123715	0.574063	0.348889		0.0247147	0.475063	0.249889		-0.113236	0.337112	0.111938
25_Pyridine-Pyridine_pi-pi_0.95_dimer.out	-495.903	25_Pyridine-Pyridine_pi-pi_0.95_cpA.out	-247.949	25_Pyridine-Pyridine_pi-pi_0.95_cpB.out	-247.949	25_Pyridine-Pyridine_pi-pi_1.00_monomerA.out	-247.949	25_Pyridine-Pyridine_pi-pi_1.00_monomerB.out	-247.949		2.99036	3.36348	3.17692		2.891	2.997	3.11051		0.099363	0.472479	0.285921		-0.00663705	0.366479	0.179921		-0.120152	0.252965	0.0664065
25_Pyridine-Pyridine_pi-pi_1.00_dimer.out	-495.904	25_Pyridine-Pyridine_pi-pi_1.00_cpA.out	-247.949	25_Pyridine-Pyridine_pi-pi_1.00_cpB.out	-247.949	25_Pyridine-Pyridine_pi-pi_1.00_monomerA.out	-247.949	25_Pyridine-Pyridine_pi-pi_1.00_monomerB.out	-247.949		3.68628	3.99564	3.84096		3.61	3.716	3.80907		0.0762774	0.385644	0.230961		-0.0297226	0.279644	0.124961		-0.122788	0.186579	0.0318953
25_Pyridine-Pyridine_pi-pi_1.05_dimer.out	-495.904	25_Pyridine-Pyridine_pi-pi_1.05_cpA.out	-247.949	25_Pyridine-Pyridine_pi-pi_1.05_cpB.out	-247.949	25_Pyridine-Pyridine_pi-pi_1.00_monomerA.out	-247.949	25_Pyridine-Pyridine_pi-pi_1.00_monomerB.out	-247.949		3.74054	3.9965	3.86852		3.689	3.788	3.86521		0.0515369	0.3075	0.179518		-0.0474631	0.2085	0.0805183		-0.124672	0.131291	0.00330955
25_Pyridine-Pyridine_pi-pi_1.10_dimer.out	-495.903	25_Pyridine-Pyridine_pi-pi_1.10_cpA.out	-247.949	25_Pyridine-Pyridine_pi-pi_1.10_cpB.out	-247.949	25_Pyridine-Pyridine_pi-pi_1.00_monomerA.out	-247.949	25_Pyridine-Pyridine_pi-pi_1.00_monomerB.out	-247.949		3.4832	3.69532	3.58926		3.452	3.543	3.60651		0.0311992	0.24332	0.13726		-0.0598008	0.15232	0.0462597		-0.123312	0.0888089	-0.0172516
25_Pyridine-Pyridine_pi-pi_1.25_dimer.out	-495.901	25_Pyridine-Pyridine_pi-pi_1.25_cpA.out	-247.949	25_Pyridine-Pyridine_pi-pi_1.25_cpB.out	-247.949	25_Pyridine-Pyridine_pi-pi_1.00_monomerA.out	-247.949	25_Pyridine-Pyridine_pi-pi_1.00_monomerB.out	-247.949		2.28301	2.40742	2.34522		2.299	2.36	2.39647		-0.0159882	0.108423	0.0462175		-0.0769882	0.0474231	-0.0147825		-0.113455	0.0109567	-0.0512489
25_Pyridine-Pyridine_pi-pi_1.50_dimer.out	-495.899	25_Pyridine-Pyridine_pi-pi_1.50_cpA.out	-247.949	25_Pyridine-Pyridine_pi-pi_1.50_cpB.out	-247.949	25_Pyridine-Pyridine_pi-pi_1.00_monomerA.out	-247.949	25_Pyridine-Pyridine_pi-pi_1.00_monomerB.out	-247.949		0.913605	0.967211	0.940408		0.945	0.974	0.990079		-0.0313952	0.0222113	-0.00459198		-0.0603952	-0.00678873	-0.033592		-0.0764738	-0.0228673	-0.0496706
25_Pyridine-Pyridine_pi-pi_2.00_dimer.out	-495.898	25_Pyridine-Pyridine_pi-pi_2.00_cpA.out	-247.949	25_Pyridine-Pyridine_pi-pi_2.00_cpB.out	-247.949	25_Pyridine-Pyridine_pi-pi_1.00_monomerA.out	-247.949	25_Pyridine-Pyridine_pi-pi_1.00_monomerB.out	-247.949		0.231742	0.245056	0.238399		0.233	0.241	0.245614		-0.00125782	0.0120557	0.00539892		-0.00925782	0.00405566	-0.00260108		-0.0138721	-0.000558605	-0.00721534
26_Uracil-Uracil_pi-pi_0.90_dimer.out	-828.734	26_Uracil-Uracil_pi-pi_0.90_cpA.out	-414.362	26_Uracil-Uracil_pi-pi_0.90_cpB.out	-414.362	26_Uracil-Uracil_pi-pi_1.00_monomerA.out	-414.361	26_Uracil-Uracil_pi-pi_1.00_monomerB.out	-414.361		6.48634	7.28638	6.88636		7.593	7.693	7.97577		-1.10666	-0.306625	-0.706643		-1.20666	-0.406625	-0.806643		-1.48943	-0.689395	-1.08941
26_Uracil-Uracil_pi-pi_0.95_dimer.out	-828.737	26_Uracil-Uracil_pi-pi_0.95_cpA.out	-414.362	26_Uracil-Uracil_pi-pi_0.95_cpB.out	-414.362	26_Uracil-Uracil_pi-pi_1.00_monomerA.out	-414.361	26_Uracil-Uracil_pi-pi_1.00_monomerB.out	-414.361		8.40856	9.10206	8.75531		9.266	9.396	9.64006		-0.857439	-0.163937	-0.510688		-0.987439	-0.293937	-0.640688		-1.2315	-0.537996	-0.884747
26_Uracil-Uracil_pi-pi_1.00_dimer.out	-828.737	26_Uracil-Uracil_pi-pi_1.00_cpA.out	-414.362	26_Uracil-Uracil_pi-pi_1.00_cpB.out	-414.362	26_Uracil-Uracil_pi-pi_1.00_monomerA.out	-414.361	26_Uracil-Uracil_pi-pi_1.00_monomerB.out	-414.361		8.94734	9.54757	9.24746		9.619	9.765	9.97639		-0.671663	-0.0714258	-0.371544		-0.817663	-0.217426	-0.517544		-1.02905	-0.428812	-0.728931
26_Uracil-Uracil_pi-pi_1.05_dimer.out	-828.737	26_Uracil-Uracil_pi-pi_1.05_cpA.out	-414.362	26_Uracil-Uracil_pi-pi_1.05_cpB.out	-414.362	26_Uracil-Uracil_pi-pi_1.00_monomerA.out	-414.361	26_Uracil-Uracil_pi-pi_1.00_monomerB.out	-414.361		8.71808	9.23623	8.97715		9.256	9.406	9.58987		-0.537918	-0.0197725	-0.278845		-0.687918	-0.169773	-0.428845		-0.871785	-0.35364	-0.612713
26_Uracil-Uracil_pi-pi_1.10_dimer.out	-828.736	26_Uracil-Uracil_pi-pi_1.10_cpA.out	-414.361	26_Uracil-Uracil_pi-pi_1.10_cpB.out	-414.361	26_Uracil-Uracil_pi-pi_1.00_monomerA.out	-414.361	26_Uracil-Uracil_pi-pi_1.00_monomerB.out	-414.361		8.09986	8.54698	8.32342		8.541	8.688	8.84824		-0.441138	0.00598199	-0.217578		-0.588138	-0.141018	-0.364578		-0.748375	-0.301255	-0.524815
26_Uracil-Uracil_pi-pi_1.25_dimer.out	-828.732	26_Uracil-Uracil_pi-pi_1.25_cpA.out	-414.361	26_Uracil-Uracil_pi-pi_1.25_cpB.out	-414.361	26_Uracil-Uracil_pi-pi_1.00_monomerA.out	-414.361	26_Uracil-Uracil_pi-pi_1.00_monomerB.out	-414.361		5.71326	6.00787	5.86057		5.993	6.11	6.21709		-0.27974	0.0148741	-0.132433		-0.39674	-0.102126	-0.249433		-0.50383	-0.209215	-0.356523
26_Uracil-Uracil_pi-pi_1.50_dimer.out	-828.727	26_Uracil-Uracil_pi-pi_1.50_cpA.out	-414.361	26_Uracil-Uracil_pi-pi_1.50_cpB.out	-414.361	26_Uracil-Uracil_pi-pi_1.00_monomerA.out	-414.361	26_Uracil-Uracil_pi-pi_1.00_monomerB.out	-414.361		2.91148	3.06407	2.98777		3.071	3.138	3.19565		-0.159519	-0.00693305	-0.0832258		-0.226519	-0.0739331	-0.150226		-0.284167	-0.131581	-0.207874
26_Uracil-Uracil_pi-pi_2.00_dimer.out	-828.724	26_Uracil-Uracil_pi-pi_2.00_cpA.out	-414.361	26_Uracil-Uracil_pi-pi_2.00_cpB.out	-414.361	26_Uracil-Uracil_pi-pi_1.00_monomerA.out	-414.361	26_Uracil-Uracil_pi-pi_1.00_monomerB.out	-414.361		0.96281	1.00857	0.985688		0.986	1.013	1.03386		-0.0231896	0.0225655	-0.000312085		-0.0501896	-0.00443452	-0.0273121		-0.0710521	-0.0252969	-0.0481745
27_Benzene-Pyridine_pi-pi_0.90_dimer.out	-479.869	27_Benzene-Pyridine_pi-pi_0.90_cpA.out	-247.949	27_Benzene-Pyridine_pi-pi_0.90_cpB.out	-231.919	27_Benzene-Pyridine_pi-pi_1.00_monomerA.out	-231.918	27_Benzene-Pyridine_pi-pi_1.00_monomerB.out	-247.949		0.449019	0.89958	0.6743		0.362	0.463	0.602151		0.0870191	0.53758	0.3123		-0.0139809	0.43658	0.2113		-0.153132	0.297429	0.0721488
27_Benzene-Pyridine_pi-pi_0.95_dimer.out	-479.872	27_Benzene-Pyridine_pi-pi_0.95_cpA.out	-247.949	27_Benzene-Pyridine_pi-pi_0.95_cpB.out	-231.919	27_Benzene-Pyridine_pi-pi_1.00_monomerA.out	-231.918	27_Benzene-Pyridine_pi-pi_1.00_monomerB.out	-247.949		2.48107	2.85204	2.66655		2.413	2.523	2.63579		0.068066	0.439041	0.253553		-0.041934	0.329041	0.143553		-0.15472	0.216255	0.0307679
27_Benzene-Pyridine_pi-pi_1.00_dimer.out	-479.873	27_Benzene-Pyridine_pi-pi_1.00_cpA.out	-247.949	27_Benzene-Pyridine_pi-pi_1.00_cpB.out	-231.919	27_Benzene-Pyridine_pi-pi_1.00_monomerA.out	-231.918	27_Benzene-Pyridine_pi-pi_1.00_monomerB.out	-247.949		3.20378	3.50779	3.35579		3.156	3.265	3.35795		0.0477787	0.351795	0.199787		-0.0612213	0.242795	0.0907867		-0.154172	0.149844	-0.00216397
27_Benzene-Pyridine_pi-pi_1.05_dimer.out	-479.873	27_Benzene-Pyridine_pi-pi_1.05_cpA.out	-247.949	27_Benzene-Pyridine_pi-pi_1.05_cpB.out	-231.919	27_Benzene-Pyridine_pi-pi_1.00_monomerA.out	-231.918	27_Benzene-Pyridine_pi-pi_1.00_monomerB.out	-247.949		3.2637	3.5171	3.3904		3.234	3.338	3.41398		0.0296963	0.283099	0.156398		-0.0743037	0.179099	0.0523979		-0.150288	0.103116	-0.0235861
27_Benzene-Pyridine_pi-pi_1.10_dimer.out	-479.872	27_Benzene-Pyridine_pi-pi_1.10_cpA.out	-247.949	27_Benzene-Pyridine_pi-pi_1.10_cpB.out	-231.919	27_Benzene-Pyridine_pi-pi_1.00_monomerA.out	-231.918	27_Benzene-Pyridine_pi-pi_1.00_monomerB.out	-247.949		3.01265	3.22097	3.11681		3.001	3.096	3.15867		0.0116473	0.219974	0.115811		-0.0833527	0.124974	0.0208107		-0.146021	0.0623059	-0.0418575
27_Benzene-Pyridine_pi-pi_1.25_dimer.out	-479.87	27_Benzene-Pyridine_pi-pi_1.25_cpA.out	-247.949	27_Benzene-Pyridine_pi-pi_1.25_cpB.out	-231.919	27_Benzene-Pyridine_pi-pi_1.00_monomerA.out	-231.918	27_Benzene-Pyridine_pi-pi_1.00_monomerB.out	-247.949		1.88365	2.00506	1.94436		1.913	1.976	2.01249		-0.029346	0.0920626	0.0313583		-0.092346	0.0290626	-0.0316417		-0.128832	-0.00742379	-0.0681281
27_Benzene-Pyridine_pi-pi_1.50_dimer.out	-479.868	27_Benzene-Pyridine_pi-pi_1.50_cpA.out	-247.949	27_Benzene-Pyridine_pi-pi_1.50_cpB.out	-231.919	27_Benzene-Pyridine_pi-pi_1.00_monomerA.out	-231.918	27_Benzene-Pyridine_pi-pi_1.00_monomerB.out	-247.949		0.668945	0.720277	0.694611		0.705	0.735	0.752017		-0.0360546	0.0152768	-0.0103889		-0.0660546	-0.0147232	-0.0403889		-0.0830715	-0.0317402	-0.0574058
27_Benzene-Pyridine_pi-pi_2.00_dimer.out	-479.867	27_Benzene-Pyridine_pi-pi_2.00_cpA.out	-247.949	27_Benzene-Pyridine_pi-pi_2.00_cpB.out	-231.919	27_Benzene-Pyridine_pi-pi_1.00_monomerA.out	-231.918	27_Benzene-Pyridine_pi-pi_1.00_monomerB.out	-247.949		0.138472	0.151229	0.144851		0.143	0.151	0.155335		-0.00452759	0.00822901	0.00185071		-0.0125276	0.000229007	-0.00614929		-0.0168631	-0.00410648	-0.0104848
28_Benzene-Uracil_pi-pi_0.90_dimer.out	-646.285	28_Benzene-Uracil_pi-pi_0.90_cpA.out	-414.362	28_Benzene-Uracil_pi-pi_0.90_cpB.out	-231.919	28_Benzene-Uracil_pi-pi_1.00_monomerA.out	-231.918	28_Benzene-Uracil_pi-pi_1.00_monomerB.out	-414.362		2.63151	3.25384	2.94267		3.178	3.278	3.49156		-0.546492	0.0758393	-0.235326		-0.646492	-0.0241607	-0.335326		-0.860056	-0.237725	-0.548891
28_Benzene-Uracil_pi-pi_0.95_dimer.out	-646.288	28_Benzene-Uracil_pi-pi_0.95_cpA.out	-414.362	28_Benzene-Uracil_pi-pi_0.95_cpB.out	-231.919	28_Benzene-Uracil_pi-pi_1.00_monomerA.out	-231.918	28_Benzene-Uracil_pi-pi_1.00_monomerB.out	-414.362		4.49976	5.02845	4.7641		4.924	5.041	5.22194		-0.424244	0.104448	-0.159898		-0.541244	-0.0125521	-0.276898		-0.722187	-0.193495	-0.457841
28_Benzene-Uracil_pi-pi_1.00_dimer.out	-646.289	28_Benzene-Uracil_pi-pi_1.00_cpA.out	-414.362	28_Benzene-Uracil_pi-pi_1.00_cpB.out	-231.919	28_Benzene-Uracil_pi-pi_1.00_monomerA.out	-231.918	28_Benzene-Uracil_pi-pi_1.00_monomerB.out	-414.362		5.12723	5.57644	5.35184		5.465	5.588	5.74119		-0.337768	0.111439	-0.113164		-0.460768	-0.0115608	-0.236164		-0.613962	-0.164755	-0.389359
28_Benzene-Uracil_pi-pi_1.05_dimer.out	-646.289	28_Benzene-Uracil_pi-pi_1.05_cpA.out	-414.362	28_Benzene-Uracil_pi-pi_1.05_cpB.out	-231.919	28_Benzene-Uracil_pi-pi_1.00_monomerA.out	-231.918	28_Benzene-Uracil_pi-pi_1.00_monomerB.out	-414.362		5.07657	5.45968	5.26813		5.351	5.475	5.60411		-0.27443	0.108683	-0.0828734		-0.39843	-0.0153168	-0.206873		-0.527539	-0.144426	-0.335982
28_Benzene-Uracil_pi-pi_1.10_dimer.out	-646.288	28_Benzene-Uracil_pi-pi_1.10_cpA.out	-414.362	28_Benzene-Uracil_pi-pi_1.10_cpB.out	-231.919	28_Benzene-Uracil_pi-pi_1.00_monomerA.out	-231.918	28_Benzene-Uracil_pi-pi_1.00_monomerB.out	-414.362		4.68372	5.00878	4.84625		4.916	5.034	5.14357		-0.232282	0.0927849	-0.0697487		-0.350282	-0.0252151	-0.187749		-0.459852	-0.134784	-0.297318
28_Benzene-Uracil_pi-pi_1.25_dimer.out	-646.285	28_Benzene-Uracil_pi-pi_1.25_cpA.out	-414.362	28_Benzene-Uracil_pi-pi_1.25_cpB.out	-231.919	28_Benzene-Uracil_pi-pi_1.00_monomerA.out	-231.918	28_Benzene-Uracil_pi-pi_1.00_monomerB.out	-414.362		3.04168	3.24688	3.14428		3.207	3.296	3.36301		-0.165325	0.0398798	-0.0627224		-0.254325	-0.0491202	-0.151722		-0.321336	-0.116131	-0.218734
28_Benzene-Uracil_pi-pi_1.50_dimer.out	-646.282	28_Benzene-Uracil_pi-pi_1.50_cpA.out	-414.362	28_Benzene-Uracil_pi-pi_1.50_cpB.out	-231.919	28_Benzene-Uracil_pi-pi_1.00_monomerA.out	-231.918	28_Benzene-Uracil_pi-pi_1.00_monomerB.out	-414.362		1.22656	1.32375	1.27516		1.334	1.38	1.41237		-0.107436	-0.0102485	-0.0588424		-0.153436	-0.0562485	-0.104842		-0.185803	-0.0886157	-0.13721
28_Benzene-Uracil_pi-pi_2.00_dimer.out	-646.28	28_Benzene-Uracil_pi-pi_2.00_cpA.out	-414.362	28_Benzene-Uracil_pi-pi_2.00_cpB.out	-231.918	28_Benzene-Uracil_pi-pi_1.00_monomerA.out	-231.918	28_Benzene-Uracil_pi-pi_1.00_monomerB.out	-414.362		0.222828	0.249839	0.236334		0.246	0.26	0.271054		-0.0231719	0.00383947	-0.00966622		-0.0371719	-0.0101605	-0.0236662		-0.0482255	-0.0212141	-0.0347198
29_Pyridine-Uracil_pi-pi_0.90_dimer.out	-662.316	29_Pyridine-Uracil_pi-pi_0.90_cpA.out	-414.362	29_Pyridine-Uracil_pi-pi_0.90_cpB.out	-247.949	29_Pyridine-Uracil_pi-pi_1.00_monomerA.out	-247.949	29_Pyridine-Uracil_pi-pi_1.00_monomerB.out	-414.361		2.80042	3.44813	3.12428		3.374	3.46	3.67934		-0.573578	0.0741346	-0.249722		-0.659578	-0.0118654	-0.335722		-0.878923	-0.23121	-0.555067
29_Pyridine-Uracil_pi-pi_0.95_dimer.out	-662.32	29_Pyridine-Uracil_pi-pi_0.95_cpA.out	-414.362	29_Pyridine-Uracil_pi-pi_0.95_cpB.out	-247.949	29_Pyridine-Uracil_pi-pi_1.00_monomerA.out	-247.949	29_Pyridine-Uracil_pi-pi_1.00_monomerB.out	-414.361		5.45889	5.99445	5.72667		5.878	5.99	6.17031		-0.419112	0.116452	-0.15133		-0.531112	0.00445151	-0.26333		-0.711421	-0.175858	-0.443639
29_Pyridine-Uracil_pi-pi_1.00_dimer.out	-662.321	29_Pyridine-Uracil_pi-pi_1.00_cpA.out	-414.362	29_Pyridine-Uracil_pi-pi_1.00_cpB.out	-247.949	29_Pyridine-Uracil_pi-pi_1.00_monomerA.out	-247.949	29_Pyridine-Uracil_pi-pi_1.00_monomerB.out	-414.361		6.26114	6.70657	6.48385		6.576	6.698	6.84711		-0.314859	0.130565	-0.092147		-0.436859	0.00856507	-0.214147		-0.585969	-0.140545	-0.363257
29_Pyridine-Uracil_pi-pi_1.05_dimer.out	-662.321	29_Pyridine-Uracil_pi-pi_1.05_cpA.out	-414.362	29_Pyridine-Uracil_pi-pi_1.05_cpB.out	-247.949	29_Pyridine-Uracil_pi-pi_1.00_monomerA.out	-247.949	29_Pyridine-Uracil_pi-pi_1.00_monomerB.out	-414.361		6.1452	6.51524	6.33022		6.391	6.513	6.63673		-0.245801	0.124245	-0.0607781		-0.367801	0.00224471	-0.182778		-0.491526	-0.121481	-0.306503
29_Pyridine-Uracil_pi-pi_1.10_dimer.out	-662.32	29_Pyridine-Uracil_pi-pi_1.10_cpA.out	-414.362	29_Pyridine-Uracil_pi-pi_1.10_cpB.out	-247.949	29_Pyridine-Uracil_pi-pi_1.00_monomerA.out	-247.949	29_Pyridine-Uracil_pi-pi_1.00_monomerB.out	-414.361		5.61699	5.92301	5.77		5.82	5.936	6.03884		-0.203007	0.103008	-0.0499996		-0.319007	-0.0129924	-0.166		-0.421851	-0.115836	-0.268843
29_Pyridine-Uracil_pi-pi_1.25_dimer.out	-662.316	29_Pyridine-Uracil_pi-pi_1.25_cpA.out	-414.362	29_Pyridine-Uracil_pi-pi_1.25_cpB.out	-247.949	29_Pyridine-Uracil_pi-pi_1.00_monomerA.out	-247.949	29_Pyridine-Uracil_pi-pi_1.00_monomerB.out	-414.361		3.65089	3.83338	3.74213		3.793	3.876	3.93693		-0.142111	0.0403791	-0.0508657		-0.225111	-0.0426209	-0.133866		-0.286039	-0.103549	-0.194794
29_Pyridine-Uracil_pi-pi_1.50_dimer.out	-662.313	29_Pyridine-Uracil_pi-pi_1.50_cpA.out	-414.362	29_Pyridine-Uracil_pi-pi_1.50_cpB.out	-247.949	29_Pyridine-Uracil_pi-pi_1.00_monomerA.out	-247.949	29_Pyridine-Uracil_pi-pi_1.00_monomerB.out	-414.361		1.66941	1.75325	1.71133		1.752	1.796	1.82447		-0.0825857	0.00124555	-0.0406701		-0.126586	-0.0427545	-0.0846701		-0.155051	-0.07122	-0.113136
29_Pyridine-Uracil_pi-pi_2.00_dimer.out	-662.311	29_Pyridine-Uracil_pi-pi_2.00_cpA.out	-414.361	29_Pyridine-Uracil_pi-pi_2.00_cpB.out	-247.949	29_Pyridine-Uracil_pi-pi_1.00_monomerA.out	-247.949	29_Pyridine-Uracil_pi-pi_1.00_monomerB.out	-414.361		0.520386	0.542709	0.531548		0.529	0.543	0.552071		-0.00861397	0.0137093	0.00254769		-0.022614	-0.00029065	-0.0114523		-0.0316847	-0.00936139	-0.0205231
30_Benzene-Ethene_0.90_dimer.out	-310.393	30_Benzene-Ethene_0.90_cpA.out	-78.4739	30_Benzene-Ethene_0.90_cpB.out	-231.919	30_Benzene-Ethene_1.00_monomerA.out	-231.919	30_Benzene-Ethene_1.00_monomerB.out	-78.4737		0.0523568	0.289763	0.17106		0.021	0.048	0.110963		0.0313568	0.268763	0.15006		0.00435676	0.241763	0.12306		-0.0586064	0.1788	0.0600967
30_Benzene-Ethene_0.95_dimer.out	-310.394	30_Benzene-Ethene_0.95_cpA.out	-78.4738	30_Benzene-Ethene_0.95_cpB.out	-231.919	30_Benzene-Ethene_1.00_monomerA.out	-231.919	30_Benzene-Ethene_1.00_monomerB.out	-78.4737		0.959981	1.15633	1.05815		0.939	0.977	1.02729		0.0209806	0.217329	0.119155		-0.0170194	0.179329	0.0811549		-0.0673099	0.129039	0.0308644
30_Benzene-Ethene_1.00_dimer.out	-310.394	30_Benzene-Ethene_1.00_cpA.out	-78.4738	30_Benzene-Ethene_1.00_cpB.out	-231.919	30_Benzene-Ethene_1.00_monomerA.out	-231.919	30_Benzene-Ethene_1.00_monomerB.out	-78.4737		1.27766	1.43911	1.35838		1.269	1.31	1.35041		0.00865665	0.170108	0.0893822		-0.0323433	0.129108	0.0483822		-0.0727523	0.0886988	0.00797326
30_Benzene-Ethene_1.05_dimer.out	-310.394	30_Benzene-Ethene_1.05_cpA.out	-78.4738	30_Benzene-Ethene_1.05_cpB.out	-231.919	30_Benzene-Ethene_1.00_monomerA.out	-231.919	30_Benzene-Ethene_1.00_monomerB.out	-78.4737		1.29005	1.42268	1.35636		1.292	1.333	1.36583		-0.00195485	0.130675	0.0643602		-0.0429549	0.0896753	0.0233602		-0.075789	0.0568411	-0.00947393
30_Benzene-Ethene_1.10_dimer.out	-310.394	30_Benzene-Ethene_1.10_cpA.out	-78.4738	30_Benzene-Ethene_1.10_cpB.out	-231.919	30_Benzene-Ethene_1.00_monomerA.out	-231.919	30_Benzene-Ethene_1.00_monomerB.out	-78.4737		1.15932	1.26895	1.21414		1.172	1.21	1.23689		-0.0126755	0.0969506	0.0421376		-0.0506755	0.0589506	0.00413757		-0.0775699	0.0320562	-0.0227569
30_Benzene-Ethene_1.25_dimer.out	-310.393	30_Benzene-Ethene_1.25_cpA.out	-78.4737	30_Benzene-Ethene_1.25_cpB.out	-231.919	30_Benzene-Ethene_1.00_monomerA.out	-231.919	30_Benzene-Ethene_1.00_monomerB.out	-78.4737		0.614901	0.675916	0.645408		0.651	0.678	0.69203		-0.0360986	0.0249156	-0.00559155		-0.0630986	-0.00208445	-0.0325915		-0.0771284	-0.0161142	-0.0466213
30_Benzene-Ethene_1.50_dimer.out	-310.392	30_Benzene-Ethene_1.50_cpA.out	-78.4737	30_Benzene-Ethene_1.50_cpB.out	-231.919	30_Benzene-Ethene_1.00_monomerA.out	-231.919	30_Benzene-Ethene_1.00_monomerB.out	-78.4737		0.122499	0.147551	0.135025		0.159	0.176	0.182771		-0.0365014	-0.0114487	-0.023975		-0.0535014	-0.0284487	-0.040975		-0.0602727	-0.03522	-0.0477464
30_Benzene-Ethene_2.00_dimer.out	-310.392	30_Benzene-Ethene_2.00_cpA.out	-78.4737	30_Benzene-Ethene_2.00_cpB.out	-231.919	30_Benzene-Ethene_1.00_monomerA.out	-231.919	30_Benzene-Ethene_1.00_monomerB.out	-78.4737		-0.0201898	-0.0140828	-0.0171363		-0.013	-0.008	-0.00645559		-0.00718982	-0.0010828	-0.00413631		-0.0121898	-0.0060828	-0.00913631		-0.0137342	-0.00762721	-0.0106807
31_Uracil-Ethene_0.90_dimer.out	-492.839	31_Uracil-Ethene_0.90_cpA.out	-78.4739	31_Uracil-Ethene_0.90_cpB.out	-414.362	31_Uracil-Ethene_1.00_monomerA.out	-414.362	31_Uracil-Ethene_1.00_monomerB.out	-78.4737		2.11372	2.42091	2.26732		2.396	2.424	2.51916		-0.282284	0.0249149	-0.128685		-0.310284	-0.0030851	-0.156685		-0.405444	-0.0982446	-0.251844
31_Uracil-Ethene_0.95_dimer.out	-492.84	31_Uracil-Ethene_0.95_cpA.out	-78.4739	31_Uracil-Ethene_0.95_cpB.out	-414.362	31_Uracil-Ethene_1.00_monomerA.out	-414.362	31_Uracil-Ethene_1.00_monomerB.out	-78.4737		2.87981	3.13997	3.00989		3.092	3.13	3.2089		-0.212188	0.0479692	-0.0821093		-0.250188	0.00996916	-0.120109		-0.329085	-0.0689279	-0.199006
31_Uracil-Ethene_1.00_dimer.out	-492.841	31_Uracil-Ethene_1.00_cpA.out	-78.4738	31_Uracil-Ethene_1.00_cpB.out	-414.362	31_Uracil-Ethene_1.00_monomerA.out	-414.362	31_Uracil-Ethene_1.00_monomerB.out	-78.4737		3.0929	3.31278	3.20284		3.257	3.3	3.36541		-0.164105	0.0557809	-0.0541619		-0.207105	0.0127809	-0.0971619		-0.272517	-0.0526313	-0.162574
31_Uracil-Ethene_1.05_dimer.out	-492.84	31_Uracil-Ethene_1.05_cpA.out	-78.4738	31_Uracil-Ethene_1.05_cpB.out	-414.362	31_Uracil-Ethene_1.00_monomerA.out	-414.362	31_Uracil-Ethene_1.00_monomerB.out	-78.4737		3.0042	3.19182	3.09801		3.137	3.181	3.23506		-0.132795	0.0548236	-0.0389857		-0.176795	0.0108236	-0.0829857		-0.230854	-0.043235	-0.137044
31_Uracil-Ethene_1.10_dimer.out	-492.84	31_Uracil-Ethene_1.10_cpA.out	-78.4738	31_Uracil-Ethene_1.10_cpB.out	-414.362	31_Uracil-Ethene_1.00_monomerA.out	-414.362	31_Uracil-Ethene_1.00_monomerB.out	-78.4737		2.7654	2.92651	2.84596		2.878	2.921	2.96582		-0.112595	0.048506	-0.0320446		-0.155595	0.00550603	-0.0750446		-0.200411	-0.0393098	-0.119861
31_Uracil-Ethene_1.25_dimer.out	-492.838	31_Uracil-Ethene_1.25_cpA.out	-78.4738	31_Uracil-Ethene_1.25_cpB.out	-414.362	31_Uracil-Ethene_1.00_monomerA.out	-414.362	31_Uracil-Ethene_1.00_monomerB.out	-78.4737		1.86274	1.96408	1.91341		1.949	1.981	2.00895		-0.0862572	0.0150847	-0.0355862		-0.118257	-0.0169153	-0.0675862		-0.146211	-0.044869	-0.0955399
31_Uracil-Ethene_1.50_dimer.out	-492.837	31_Uracil-Ethene_1.50_cpA.out	-78.4737	31_Uracil-Ethene_1.50_cpB.out	-414.362	31_Uracil-Ethene_1.00_monomerA.out	-414.362	31_Uracil-Ethene_1.00_monomerB.out	-78.4737		0.859308	0.908895	0.884102		0.918	0.937	0.951385		-0.0586918	-0.00910459	-0.0338982		-0.0776918	-0.0281046	-0.0528982		-0.092077	-0.0424898	-0.0672834
31_Uracil-Ethene_2.00_dimer.out	-492.836	31_Uracil-Ethene_2.00_cpA.out	-78.4737	31_Uracil-Ethene_2.00_cpB.out	-414.362	31_Uracil-Ethene_1.00_monomerA.out	-414.362	31_Uracil-Ethene_1.00_monomerB.out	-78.4737		0.239091	0.24932	0.244205		0.251	0.257	0.261729		-0.0119086	-0.00168045	-0.00679453		-0.0179086	-0.00768045	-0.0127945		-0.0226381	-0.0124099	-0.017524
32_Uracil-Ethyne_0.90_dimer.out	-491.588	32_Uracil-Ethyne_0.90_cpA.out	-77.2225	32_Uracil-Ethyne_0.90_cpB.out	-414.362	32_Uracil-Ethyne_1.00_monomerA.out	-414.361	32_Uracil-Ethyne_1.00_monomerB.out	-77.2223		2.4699	2.75005	2.60998		2.587	2.628	2.70836		-0.117101	0.163055	0.0229767		-0.158101	0.122055	-0.0180233		-0.238459	0.0416969	-0.0983812
32_Uracil-Ethyne_0.95_dimer.out	-491.589	32_Uracil-Ethyne_0.95_cpA.out	-77.2225	32_Uracil-Ethyne_0.95_cpB.out	-414.362	32_Uracil-Ethyne_1.00_monomerA.out	-414.361	32_Uracil-Ethyne_1.00_monomerB.out	-77.2223		3.30735	3.54449	3.42592		3.387	3.442	3.50744		-0.079649	0.157491	0.038921		-0.134649	0.102491	-0.016079		-0.200092	0.0370477	-0.0815223
32_Uracil-Ethyne_1.00_dimer.out	-491.59	32_Uracil-Ethyne_1.00_cpA.out	-77.2224	32_Uracil-Ethyne_1.00_cpB.out	-414.362	32_Uracil-Ethyne_1.00_monomerA.out	-414.361	32_Uracil-Ethyne_1.00_monomerB.out	-77.2223		3.53071	3.73163	3.63117		3.587	3.649	3.70204		-0.0562917	0.144626	0.044167		-0.118292	0.0826256	-0.017833		-0.171328	0.0295895	-0.0708692
32_Uracil-Ethyne_1.05_dimer.out	-491.589	32_Uracil-Ethyne_1.05_cpA.out	-77.2224	32_Uracil-Ethyne_1.05_cpB.out	-414.362	32_Uracil-Ethyne_1.00_monomerA.out	-414.361	32_Uracil-Ethyne_1.00_monomerB.out	-77.2223		3.42047	3.59121	3.50584		3.464	3.528	3.57104		-0.0435257	0.127214	0.0418441		-0.107526	0.0632139	-0.0221559		-0.15057	0.0201692	-0.0652007
32_Uracil-Ethyne_1.10_dimer.out	-491.589	32_Uracil-Ethyne_1.10_cpA.out	-77.2224	32_Uracil-Ethyne_1.10_cpB.out	-414.362	32_Uracil-Ethyne_1.00_monomerA.out	-414.361	32_Uracil-Ethyne_1.00_monomerB.out	-77.2223		3.14533	3.29169	3.21851		3.183	3.247	3.28142		-0.0376654	0.108686	0.0355101		-0.101665	0.0446856	-0.0284899		-0.136089	0.0102618	-0.0629137
32_Uracil-Ethyne_1.25_dimer.out	-491.587	32_Uracil-Ethyne_1.25_cpA.out	-77.2224	32_Uracil-Ethyne_1.25_cpB.out	-414.362	32_Uracil-Ethyne_1.00_monomerA.out	-414.361	32_Uracil-Ethyne_1.00_monomerB.out	-77.2223		2.11916	2.21214	2.16565		2.159	2.213	2.23208		-0.0398381	0.0531433	0.00665259		-0.0938381	-0.000856712	-0.0473474		-0.112916	-0.0199343	-0.066425
32_Uracil-Ethyne_1.50_dimer.out	-491.585	32_Uracil-Ethyne_1.50_cpA.out	-77.2223	32_Uracil-Ethyne_1.50_cpB.out	-414.361	32_Uracil-Ethyne_1.00_monomerA.out	-414.361	32_Uracil-Ethyne_1.00_monomerB.out	-77.2223		0.975075	1.02055	0.997814		1.012	1.045	1.05367		-0.0369252	0.00855311	-0.0141861		-0.0699252	-0.0244469	-0.0471861		-0.078593	-0.0331147	-0.0558539
32_Uracil-Ethyne_2.00_dimer.out	-491.584	32_Uracil-Ethyne_2.00_cpA.out	-77.2223	32_Uracil-Ethyne_2.00_cpB.out	-414.361	32_Uracil-Ethyne_1.00_monomerA.out	-414.361	32_Uracil-Ethyne_1.00_monomerB.out	-77.2223		0.259003	0.270785	0.264894		0.264	0.275	0.277912		-0.00499656	0.00678518	0.000894309		-0.0159966	-0.00421482	-0.0101057		-0.0189086	-0.00712689	-0.0130178
33_Pyridine-Ethene_0.90_dimer.out	-326.424	33_Pyridine-Ethene_0.90_cpA.out	-78.4739	33_Pyridine-Ethene_0.90_cpB.out	-247.949	33_Pyridine-Ethene_1.00_monomerA.out	-247.949	33_Pyridine-Ethene_1.00_monomerB.out	-78.4737		0.690508	0.92296	0.806734		0.668	0.699	0.764551		0.0225076	0.25496	0.138734		-0.00849236	0.22396	0.107734		-0.0740434	0.158409	0.0421827
33_Pyridine-Ethene_0.95_dimer.out	-326.425	33_Pyridine-Ethene_0.95_cpA.out	-78.4738	33_Pyridine-Ethene_0.95_cpB.out	-247.949	33_Pyridine-Ethene_1.00_monomerA.out	-247.949	33_Pyridine-Ethene_1.00_monomerB.out	-78.4737		1.46528	1.65967	1.56247		1.447	1.487	1.54094		0.0182779	0.212666	0.115472		-0.0217221	0.172666	0.0754717		-0.0756603	0.118727	0.0215335
33_Pyridine-Ethene_1.00_dimer.out	-326.425	33_Pyridine-Ethene_1.00_cpA.out	-78.4738	33_Pyridine-Ethene_1.00_cpB.out	-247.949	33_Pyridine-Ethene_1.00_monomerA.out	-247.949	33_Pyridine-Ethene_1.00_monomerB.out	-78.4737		1.73237	1.89494	1.81365		1.721	1.764	1.8083		0.011368	0.173941	0.0926547		-0.031632	0.130941	0.0496547		-0.0759288	0.0866446	0.00535792
33_Pyridine-Ethene_1.05_dimer.out	-326.425	33_Pyridine-Ethene_1.05_cpA.out	-78.4738	33_Pyridine-Ethene_1.05_cpB.out	-247.949	33_Pyridine-Ethene_1.00_monomerA.out	-247.949	33_Pyridine-Ethene_1.00_monomerB.out	-78.4737		1.72182	1.85803	1.78992		1.719	1.762	1.79853		0.0028208	0.139028	0.0709245		-0.0401792	0.0960281	0.0279245		-0.0767065	0.0595008	-0.00860281
33_Pyridine-Ethene_1.10_dimer.out	-326.425	33_Pyridine-Ethene_1.10_cpA.out	-78.4738	33_Pyridine-Ethene_1.10_cpB.out	-247.949	33_Pyridine-Ethene_1.00_monomerA.out	-247.949	33_Pyridine-Ethene_1.00_monomerB.out	-78.4737		1.57456	1.68905	1.63181		1.581	1.621	1.65103		-0.00643547	0.108054	0.0508094		-0.0464355	0.0680542	0.0108094		-0.0764619	0.0380278	-0.019217
33_Pyridine-Ethene_1.25_dimer.out	-326.424	33_Pyridine-Ethene_1.25_cpA.out	-78.4737	33_Pyridine-Ethene_1.25_cpB.out	-247.949	33_Pyridine-Ethene_1.00_monomerA.out	-247.949	33_Pyridine-Ethene_1.00_monomerB.out	-78.4737		0.955347	1.02305	0.9892		0.985	1.013	1.02959		-0.0296528	0.0380532	0.00420018		-0.0576528	0.0100532	-0.0237998		-0.0742457	-0.00653963	-0.0403926
33_Pyridine-Ethene_1.50_dimer.out	-326.423	33_Pyridine-Ethene_1.50_cpA.out	-78.4737	33_Pyridine-Ethene_1.50_cpB.out	-247.949	33_Pyridine-Ethene_1.00_monomerA.out	-247.949	33_Pyridine-Ethene_1.00_monomerB.out	-78.4737		0.315693	0.345891	0.330792		0.35	0.367	0.373598		-0.0343066	-0.00410907	-0.0192079		-0.0513066	-0.0211091	-0.0362079		-0.0579051	-0.0277075	-0.0428063
33_Pyridine-Ethene_2.00_dimer.out	-326.423	33_Pyridine-Ethene_2.00_cpA.out	-78.4737	33_Pyridine-Ethene_2.00_cpB.out	-247.949	33_Pyridine-Ethene_1.00_monomerA.out	-247.949	33_Pyridine-Ethene_1.00_monomerB.out	-78.4737		0.0336931	0.040822	0.0372576		0.042	0.047	0.0492694		-0.00830689	-0.00117796	-0.00474243		-0.0133069	-0.00617796	-0.00974243		-0.0155763	-0.00844734	-0.0120118
34_Pentane-Pentane_0.90_dimer.out	-394.972	34_Pentane-Pentane_0.90_cpA.out	-197.485	34_Pentane-Pentane_0.90_cpB.out	-197.485	34_Pentane-Pentane_1.00_monomerA.out	-197.484	34_Pentane-Pentane_1.00_monomerB.out	-197.484		2.01103	2.28636	2.1487		2.796	2.789	2.91887		-0.784967	-0.509636	-0.647302		-0.777967	-0.502636	-0.640302		-0.907835	-0.632505	-0.77017
34_Pentane-Pentane_0.95_dimer.out	-394.974	34_Pentane-Pentane_0.95_cpA.out	-197.484	34_Pentane-Pentane_0.95_cpB.out	-197.484	34_Pentane-Pentane_1.00_monomerA.out	-197.484	34_Pentane-Pentane_1.00_monomerB.out	-197.484		2.95912	3.1934	3.07626		3.564	3.569	3.67445		-0.604877	-0.370598	-0.487738		-0.609877	-0.375598	-0.492738		-0.715324	-0.481045	-0.598185
34_Pentane-Pentane_1.00_dimer.out	-394.974	34_Pentane-Pentane_1.00_cpA.out	-197.484	34_Pentane-Pentane_1.00_cpB.out	-197.484	34_Pentane-Pentane_1.00_monomerA.out	-197.484	34_Pentane-Pentane_1.00_monomerB.out	-197.484		3.24435	3.43917	3.34176		3.723	3.734	3.81979		-0.478649	-0.283827	-0.381238		-0.489649	-0.294827	-0.392238		-0.575438	-0.380616	-0.478027
34_Pentane-Pentane_1.05_dimer.out	-394.974	34_Pentane-Pentane_1.05_cpA.out	-197.484	34_Pentane-Pentane_1.05_cpB.out	-197.484	34_Pentane-Pentane_1.00_monomerA.out	-197.484	34_Pentane-Pentane_1.00_monomerB.out	-197.484		3.17758	3.3418	3.25969		3.567	3.581	3.65128		-0.389419	-0.225205	-0.307312		-0.403419	-0.239205	-0.321312		-0.473698	-0.309483	-0.39159
34_Pentane-Pentane_1.10_dimer.out	-394.973	34_Pentane-Pentane_1.10_cpA.out	-197.484	34_Pentane-Pentane_1.10_cpB.out	-197.484	34_Pentane-Pentane_1.00_monomerA.out	-197.484	34_Pentane-Pentane_1.00_monomerB.out	-197.484		2.93661	3.07852	3.00756		3.265	3.278	3.33681		-0.328389	-0.186481	-0.257435		-0.341389	-0.199481	-0.270435		-0.400199	-0.258291	-0.329245
34_Pentane-Pentane_1.25_dimer.out	-394.972	34_Pentane-Pentane_1.25_cpA.out	-197.484	34_Pentane-Pentane_1.25_cpB.out	-197.484	34_Pentane-Pentane_1.00_monomerA.out	-197.484	34_Pentane-Pentane_1.00_monomerB.out	-197.484		1.97877	2.0657	2.02223		2.211	2.223	2.25711		-0.232228	-0.145305	-0.188766		-0.244228	-0.157305	-0.200766		-0.27834	-0.191417	-0.234879
34_Pentane-Pentane_1.50_dimer.out	-394.97	34_Pentane-Pentane_1.50_cpA.out	-197.484	34_Pentane-Pentane_1.50_cpB.out	-197.484	34_Pentane-Pentane_1.00_monomerA.out	-197.484	34_Pentane-Pentane_1.00_monomerB.out	-197.484		0.888672	0.935633	0.912153		1.039	1.05	1.06638		-0.150328	-0.103367	-0.126847		-0.161328	-0.114367	-0.137847		-0.177711	-0.13075	-0.154231
34_Pentane-Pentane_2.00_dimer.out	-394.969	34_Pentane-Pentane_2.00_cpA.out	-197.484	34_Pentane-Pentane_2.00_cpB.out	-197.484	34_Pentane-Pentane_1.00_monomerA.out	-197.484	34_Pentane-Pentane_1.00_monomerB.out	-197.484		0.226301	0.24109	0.233696		0.263	0.273	0.278441		-0.0366988	-0.0219098	-0.0293043		-0.0466988	-0.0319098	-0.0393043		-0.0521393	-0.0373504	-0.0447448
35_Neopentane-Pentane_0.90_dimer.out	-394.976	35_Neopentane-Pentane_0.90_cpA.out	-197.49	35_Neopentane-Pentane_0.90_cpB.out	-197.484	35_Neopentane-Pentane_1.00_monomerA.out	-197.484	35_Neopentane-Pentane_1.00_monomerB.out	-197.49		1.26728	1.47435	1.37082		1.822	1.817	1.91344		-0.554719	-0.347649	-0.451184		-0.549719	-0.342649	-0.446184		-0.646158	-0.439088	-0.542623
35_Neopentane-Pentane_0.95_dimer.out	-394.978	35_Neopentane-Pentane_0.95_cpA.out	-197.49	35_Neopentane-Pentane_0.95_cpB.out	-197.484	35_Neopentane-Pentane_1.00_monomerA.out	-197.484	35_Neopentane-Pentane_1.00_monomerB.out	-197.49		2.03325	2.20067	2.11696		2.46	2.466	2.54217		-0.426747	-0.259331	-0.343039		-0.432747	-0.265331	-0.349039		-0.508914	-0.341499	-0.425206
35_Neopentane-Pentane_1.00_dimer.out	-394.978	35_Neopentane-Pentane_1.00_cpA.out	-197.49	35_Neopentane-Pentane_1.00_cpB.out	-197.484	35_Neopentane-Pentane_1.00_monomerA.out	-197.484	35_Neopentane-Pentane_1.00_monomerB.out	-197.49		2.23914	2.37791	2.30852		2.58	2.59	2.65134		-0.34086	-0.202092	-0.271476		-0.35086	-0.212092	-0.281476		-0.4122	-0.273432	-0.342816
35_Neopentane-Pentane_1.05_dimer.out	-394.978	35_Neopentane-Pentane_1.05_cpA.out	-197.49	35_Neopentane-Pentane_1.05_cpB.out	-197.484	35_Neopentane-Pentane_1.00_monomerA.out	-197.484	35_Neopentane-Pentane_1.00_monomerB.out	-197.49		2.17458	2.28997	2.23227		2.456	2.467	2.51754		-0.281421	-0.166034	-0.223727		-0.292421	-0.177034	-0.234727		-0.342956	-0.227569	-0.285263
35_Neopentane-Pentane_1.10_dimer.out	-394.977	35_Neopentane-Pentane_1.10_cpA.out	-197.49	35_Neopentane-Pentane_1.10_cpB.out	-197.484	35_Neopentane-Pentane_1.00_monomerA.out	-197.484	35_Neopentane-Pentane_1.00_monomerB.out	-197.49		1.98761	2.08478	2.0362		2.228	2.24	2.28186		-0.240386	-0.14322	-0.191803		-0.252386	-0.15522	-0.203803		-0.294244	-0.197078	-0.245661
35_Neopentane-Pentane_1.25_dimer.out	-394.976	35_Neopentane-Pentane_1.25_cpA.out	-197.49	35_Neopentane-Pentane_1.25_cpB.out	-197.484	35_Neopentane-Pentane_1.00_monomerA.out	-197.484	35_Neopentane-Pentane_1.00_monomerB.out	-197.49		1.30402	1.36411	1.33407		1.479	1.491	1.51579		-0.174985	-0.114885	-0.144935		-0.186985	-0.126885	-0.156935		-0.211776	-0.151677	-0.181727
35_Neopentane-Pentane_1.50_dimer.out	-394.975	35_Neopentane-Pentane_1.50_cpA.out	-197.49	35_Neopentane-Pentane_1.50_cpB.out	-197.484	35_Neopentane-Pentane_1.00_monomerA.out	-197.484	35_Neopentane-Pentane_1.00_monomerB.out	-197.49		0.578306	0.610314	0.59431		0.69	0.699	0.711231		-0.111694	-0.079686	-0.09569		-0.120694	-0.088686	-0.10469		-0.132925	-0.100917	-0.116921
35_Neopentane-Pentane_2.00_dimer.out	-394.974	35_Neopentane-Pentane_2.00_cpA.out	-197.49	35_Neopentane-Pentane_2.00_cpB.out	-197.484	35_Neopentane-Pentane_1.00_monomerA.out	-197.484	35_Neopentane-Pentane_1.00_monomerB.out	-197.49		0.151001	0.160197	0.155599		0.185	0.187	0.191308		-0.0339992	-0.0248033	-0.0294013		-0.0359992	-0.0268033	-0.0314013		-0.0403074	-0.0311114	-0.0357094
36_Neopentane-Neopentane_0.90_dimer.out	-394.982	36_Neopentane-Neopentane_0.90_cpA.out	-197.49	36_Neopentane-Neopentane_0.90_cpB.out	-197.49	36_Neopentane-Neopentane_1.00_monomerA.out	-197.49	36_Neopentane-Neopentane_1.00_monomerB.out	-197.49		1.10242	1.23987	1.17115		1.425	1.428	1.48419		-0.322582	-0.185127	-0.253854		-0.325582	-0.188127	-0.256854		-0.381774	-0.244319	-0.313047
36_Neopentane-Neopentane_0.95_dimer.out	-394.982	36_Neopentane-Neopentane_0.95_cpA.out	-197.49	36_Neopentane-Neopentane_0.95_cpB.out	-197.49	36_Neopentane-Neopentane_1.00_monomerA.out	-197.49	36_Neopentane-Neopentane_1.00_monomerB.out	-197.49		1.43642	1.54911	1.49276		1.705	1.713	1.75788		-0.268583	-0.155893	-0.212238		-0.276583	-0.163893	-0.220238		-0.321465	-0.208774	-0.265119
36_Neopentane-Neopentane_1.00_dimer.out	-394.982	36_Neopentane-Neopentane_1.00_cpA.out	-197.49	36_Neopentane-Neopentane_1.00_cpB.out	-197.49	36_Neopentane-Neopentane_1.00_monomerA.out	-197.49	36_Neopentane-Neopentane_1.00_monomerB.out	-197.49		1.51332	1.6086	1.56096		1.742	1.753	1.79011		-0.228679	-0.133395	-0.181037		-0.239679	-0.144395	-0.192037		-0.276788	-0.181504	-0.229146
36_Neopentane-Neopentane_1.05_dimer.out	-394.982	36_Neopentane-Neopentane_1.05_cpA.out	-197.49	36_Neopentane-Neopentane_1.05_cpB.out	-197.49	36_Neopentane-Neopentane_1.00_monomerA.out	-197.49	36_Neopentane-Neopentane_1.00_monomerB.out	-197.49		1.45496	1.53605	1.49551		1.625	1.667	1.6984		-0.170039	-0.0889509	-0.129495		-0.212039	-0.130951	-0.171495		-0.243438	-0.16235	-0.202894
36_Neopentane-Neopentane_1.10_dimer.out	-394.982	36_Neopentane-Neopentane_1.10_cpA.out	-197.49	36_Neopentane-Neopentane_1.10_cpB.out	-197.49	36_Neopentane-Neopentane_1.00_monomerA.out	-197.49	36_Neopentane-Neopentane_1.00_monomerB.out	-197.49		1.33135	1.39959	1.36547		1.502	1.524	1.55092		-0.170654	-0.102415	-0.136534		-0.192654	-0.124415	-0.158534		-0.219574	-0.151335	-0.185454
36_Neopentane-Neopentane_1.25_dimer.out	-394.981	36_Neopentane-Neopentane_1.25_cpA.out	-197.49	36_Neopentane-Neopentane_1.25_cpB.out	-197.49	36_Neopentane-Neopentane_1.00_monomerA.out	-197.49	36_Neopentane-Neopentane_1.00_monomerB.out	-197.49		0.889144	0.929688	0.909416		1.018	1.042	1.06046		-0.128856	-0.0883123	-0.108584		-0.152856	-0.112312	-0.132584		-0.171315	-0.130771	-0.151043
36_Neopentane-Neopentane_1.50_dimer.out	-394.98	36_Neopentane-Neopentane_1.50_cpA.out	-197.49	36_Neopentane-Neopentane_1.50_cpB.out	-197.49	36_Neopentane-Neopentane_1.00_monomerA.out	-197.49	36_Neopentane-Neopentane_1.00_monomerB.out	-197.49		0.403129	0.424676	0.413903		0.497	0.504	0.512297		-0.0938708	-0.0723237	-0.0830972		-0.100871	-0.0793237	-0.0900972		-0.109168	-0.0876211	-0.0983947
36_Neopentane-Neopentane_2.00_dimer.out	-394.98	36_Neopentane-Neopentane_2.00_cpA.out	-197.49	36_Neopentane-Neopentane_2.00_cpB.out	-197.49	36_Neopentane-Neopentane_1.00_monomerA.out	-197.49	36_Neopentane-Neopentane_1.00_monomerB.out	-197.49		0.106616	0.11338	0.109998		0.132	0.136	0.138908		-0.0253841	-0.01862	-0.0220021		-0.0293841	-0.02262	-0.0260021		-0.0322926	-0.0255285	-0.0289106
37_Cyclopentane-Neopentane_0.90_dimer.out	-393.768	37_Cyclopentane-Neopentane_0.90_cpA.out	-197.49	37_Cyclopentane-Neopentane_0.90_cpB.out	-196.277	37_Cyclopentane-Neopentane_1.00_monomerA.out	-196.277	37_Cyclopentane-Neopentane_1.00_monomerB.out	-197.49		1.04723	1.24967	1.14845		1.576	1.574	1.66886		-0.528775	-0.326329	-0.427552		-0.526775	-0.324329	-0.425552		-0.621631	-0.419185	-0.520408
37_Cyclopentane-Neopentane_0.95_dimer.out	-393.769	37_Cyclopentane-Neopentane_0.95_cpA.out	-197.49	37_Cyclopentane-Neopentane_0.95_cpB.out	-196.277	37_Cyclopentane-Neopentane_1.00_monomerA.out	-196.277	37_Cyclopentane-Neopentane_1.00_monomerB.out	-197.49		1.81078	1.97701	1.89389		2.217	2.225	2.29906		-0.406216	-0.239995	-0.323106		-0.414216	-0.247995	-0.331106		-0.48828	-0.322058	-0.405169
37_Cyclopentane-Neopentane_1.00_dimer.out	-393.77	37_Cyclopentane-Neopentane_1.00_cpA.out	-197.49	37_Cyclopentane-Neopentane_1.00_cpB.out	-196.277	37_Cyclopentane-Neopentane_1.00_monomerA.out	-196.277	37_Cyclopentane-Neopentane_1.00_monomerB.out	-197.49		2.04879	2.18616	2.11747		2.373	2.384	2.44277		-0.324215	-0.186845	-0.25553		-0.335215	-0.197845	-0.26653		-0.393989	-0.256619	-0.325304
37_Cyclopentane-Neopentane_1.05_dimer.out	-393.77	37_Cyclopentane-Neopentane_1.05_cpA.out	-197.49	37_Cyclopentane-Neopentane_1.05_cpB.out	-196.277	37_Cyclopentane-Neopentane_1.00_monomerA.out	-196.277	37_Cyclopentane-Neopentane_1.00_monomerB.out	-197.49		2.02658	2.14262	2.0846		2.295	2.306	2.35362		-0.268416	-0.152379	-0.210397		-0.279416	-0.163379	-0.221397		-0.327033	-0.210996	-0.269015
37_Cyclopentane-Neopentane_1.10_dimer.out	-393.769	37_Cyclopentane-Neopentane_1.10_cpA.out	-197.49	37_Cyclopentane-Neopentane_1.10_cpB.out	-196.277	37_Cyclopentane-Neopentane_1.00_monomerA.out	-196.277	37_Cyclopentane-Neopentane_1.00_monomerB.out	-197.49		1.88161	1.97984	1.93072		2.111	2.122	2.16092		-0.229389	-0.131163	-0.180276		-0.240389	-0.142163	-0.191276		-0.279314	-0.181088	-0.230201
37_Cyclopentane-Neopentane_1.25_dimer.out	-393.768	37_Cyclopentane-Neopentane_1.25_cpA.out	-197.49	37_Cyclopentane-Neopentane_1.25_cpB.out	-196.277	37_Cyclopentane-Neopentane_1.00_monomerA.out	-196.277	37_Cyclopentane-Neopentane_1.00_monomerB.out	-197.49		1.28258	1.34346	1.31302		1.449	1.458	1.48153		-0.166422	-0.105545	-0.135983		-0.175422	-0.114545	-0.144983		-0.19895	-0.138073	-0.168512
37_Cyclopentane-Neopentane_1.50_dimer.out	-393.767	37_Cyclopentane-Neopentane_1.50_cpA.out	-197.49	37_Cyclopentane-Neopentane_1.50_cpB.out	-196.277	37_Cyclopentane-Neopentane_1.00_monomerA.out	-196.277	37_Cyclopentane-Neopentane_1.00_monomerB.out	-197.49		0.589503	0.62252	0.606011		0.699	0.705	0.71648		-0.109497	-0.07648	-0.0929887		-0.115497	-0.08248	-0.0989887		-0.126977	-0.09396	-0.110469
37_Cyclopentane-Neopentane_2.00_dimer.out	-393.767	37_Cyclopentane-Neopentane_2.00_cpA.out	-197.49	37_Cyclopentane-Neopentane_2.00_cpB.out	-196.277	37_Cyclopentane-Neopentane_1.00_monomerA.out	-196.277	37_Cyclopentane-Neopentane_1.00_monomerB.out	-197.49		0.152898	0.162404	0.157651		0.189	0.191	0.194453		-0.0361016	-0.0265957	-0.0313486		-0.0381016	-0.0285957	-0.0333486		-0.0415548	-0.032049	-0.0368019
38_Cyclopentane-Cyclopentane_0.90_dimer.out	-392.556	38_Cyclopentane-Cyclopentane_0.90_cpA.out	-196.277	38_Cyclopentane-Cyclopentane_0.90_cpB.out	-196.277	38_Cyclopentane-Cyclopentane_1.00_monomerA.out	-196.276	38_Cyclopentane-Cyclopentane_1.00_monomerB.out	-196.276		1.55764	1.78795	1.6728		2.198	2.199	2.30091		-0.640358	-0.410048	-0.525203		-0.641358	-0.411048	-0.526203		-0.743272	-0.512962	-0.628117
38_Cyclopentane-Cyclopentane_0.95_dimer.out	-392.557	38_Cyclopentane-Cyclopentane_0.95_cpA.out	-196.277	38_Cyclopentane-Cyclopentane_0.95_cpB.out	-196.277	38_Cyclopentane-Cyclopentane_1.00_monomerA.out	-196.276	38_Cyclopentane-Cyclopentane_1.00_monomerB.out	-196.276		2.29322	2.49005	2.39163		2.8	2.811	2.89424		-0.506781	-0.309954	-0.408368		-0.517781	-0.320954	-0.419368		-0.601026	-0.404198	-0.502612
38_Cyclopentane-Cyclopentane_1.00_dimer.out	-392.557	38_Cyclopentane-Cyclopentane_1.00_cpA.out	-196.277	38_Cyclopentane-Cyclopentane_1.00_cpB.out	-196.277	38_Cyclopentane-Cyclopentane_1.00_monomerA.out	-196.276	38_Cyclopentane-Cyclopentane_1.00_monomerB.out	-196.276		2.55556	2.72229	2.63893		2.956	2.971	3.03815		-0.400436	-0.233708	-0.317072		-0.415436	-0.248708	-0.332072		-0.482587	-0.315858	-0.399222
38_Cyclopentane-Cyclopentane_1.05_dimer.out	-392.557	38_Cyclopentane-Cyclopentane_1.05_cpA.out	-196.277	38_Cyclopentane-Cyclopentane_1.05_cpB.out	-196.277	38_Cyclopentane-Cyclopentane_1.00_monomerA.out	-196.276	38_Cyclopentane-Cyclopentane_1.00_monomerB.out	-196.276		2.49918	2.63976	2.56947		2.824	2.839	2.8931		-0.324817	-0.184243	-0.25453		-0.339817	-0.199243	-0.26953		-0.393917	-0.253342	-0.32363
38_Cyclopentane-Cyclopentane_1.10_dimer.out	-392.557	38_Cyclopentane-Cyclopentane_1.10_cpA.out	-196.277	38_Cyclopentane-Cyclopentane_1.10_cpB.out	-196.277	38_Cyclopentane-Cyclopentane_1.00_monomerA.out	-196.276	38_Cyclopentane-Cyclopentane_1.00_monomerB.out	-196.276		2.29053	2.40967	2.3501		2.563	2.578	2.62129		-0.272469	-0.153325	-0.212897		-0.287469	-0.168325	-0.227897		-0.33076	-0.211616	-0.271188
38_Cyclopentane-Cyclopentane_1.25_dimer.out	-392.556	38_Cyclopentane-Cyclopentane_1.25_cpA.out	-196.277	38_Cyclopentane-Cyclopentane_1.25_cpB.out	-196.277	38_Cyclopentane-Cyclopentane_1.00_monomerA.out	-196.276	38_Cyclopentane-Cyclopentane_1.00_monomerB.out	-196.276		1.50306	1.57719	1.54012		1.693	1.705	1.73072		-0.189942	-0.115813	-0.152878		-0.201942	-0.127813	-0.164878		-0.227661	-0.153532	-0.190596
38_Cyclopentane-Cyclopentane_1.50_dimer.out	-392.554	38_Cyclopentane-Cyclopentane_1.50_cpA.out	-196.277	38_Cyclopentane-Cyclopentane_1.50_cpB.out	-196.277	38_Cyclopentane-Cyclopentane_1.00_monomerA.out	-196.276	38_Cyclopentane-Cyclopentane_1.00_monomerB.out	-196.276		0.662541	0.704739	0.68364		0.78	0.791	0.803855		-0.117459	-0.0752607	-0.09636		-0.128459	-0.0862607	-0.10736		-0.141315	-0.0991159	-0.120215
38_Cyclopentane-Cyclopentane_2.00_dimer.out	-392.553	38_Cyclopentane-Cyclopentane_2.00_cpA.out	-196.277	38_Cyclopentane-Cyclopentane_2.00_cpB.out	-196.277	38_Cyclopentane-Cyclopentane_1.00_monomerA.out	-196.276	38_Cyclopentane-Cyclopentane_1.00_monomerB.out	-196.276		0.169991	0.183883	0.176937		0.201	0.207	0.21123		-0.0310086	-0.0171172	-0.0240629		-0.0370086	-0.0231172	-0.0300629		-0.0412383	-0.0273468	-0.0342926
39_Benzene-Cyclopentane_0.90_dimer.out	-428.198	39_Benzene-Cyclopentane_0.90_cpA.out	-196.277	39_Benzene-Cyclopentane_0.90_cpB.out	-231.919	39_Benzene-Cyclopentane_1.00_monomerA.out	-231.918	39_Benzene-Cyclopentane_1.00_monomerB.out	-196.276		1.57789	1.92007	1.74898		1.969	2.013	2.14254		-0.391107	-0.0489256	-0.220016		-0.435107	-0.0929256	-0.264016		-0.564651	-0.222469	-0.39356
39_Benzene-Cyclopentane_0.95_dimer.out	-428.2	39_Benzene-Cyclopentane_0.95_cpA.out	-196.277	39_Benzene-Cyclopentane_0.95_cpB.out	-231.919	39_Benzene-Cyclopentane_1.00_monomerA.out	-231.918	39_Benzene-Cyclopentane_1.00_monomerB.out	-196.276		2.79441	3.08148	2.93795		3.081	3.135	3.24254		-0.286586	0.000481682	-0.143052		-0.340586	-0.0535183	-0.197052		-0.448128	-0.161061	-0.304595
39_Benzene-Cyclopentane_1.00_dimer.out	-428.201	39_Benzene-Cyclopentane_1.00_cpA.out	-196.277	39_Benzene-Cyclopentane_1.00_cpB.out	-231.919	39_Benzene-Cyclopentane_1.00_monomerA.out	-231.918	39_Benzene-Cyclopentane_1.00_monomerB.out	-196.276		3.22285	3.46357	3.34321		3.438	3.496	3.58357		-0.215148	0.0255739	-0.0947872		-0.273148	-0.0324261	-0.152787		-0.36072	-0.119997	-0.240358
39_Benzene-Cyclopentane_1.05_dimer.out	-428.2	39_Benzene-Cyclopentane_1.05_cpA.out	-196.277	39_Benzene-Cyclopentane_1.05_cpB.out	-231.919	39_Benzene-Cyclopentane_1.00_monomerA.out	-231.918	39_Benzene-Cyclopentane_1.00_monomerB.out	-196.276		3.19589	3.39635	3.29612		3.364	3.42	3.49181		-0.168114	0.0323539	-0.0678799		-0.224114	-0.0236461	-0.12388		-0.295928	-0.0954609	-0.195695
39_Benzene-Cyclopentane_1.10_dimer.out	-428.2	39_Benzene-Cyclopentane_1.10_cpA.out	-196.277	39_Benzene-Cyclopentane_1.10_cpB.out	-231.919	39_Benzene-Cyclopentane_1.00_monomerA.out	-231.918	39_Benzene-Cyclopentane_1.00_monomerB.out	-196.276		2.94277	3.11259	3.02768		3.083	3.135	3.19344		-0.140226	0.0295867	-0.0553197		-0.192226	-0.0224133	-0.10732		-0.250664	-0.0808515	-0.165758
39_Benzene-Cyclopentane_1.25_dimer.out	-428.198	39_Benzene-Cyclopentane_1.25_cpA.out	-196.277	39_Benzene-Cyclopentane_1.25_cpB.out	-231.919	39_Benzene-Cyclopentane_1.00_monomerA.out	-231.918	39_Benzene-Cyclopentane_1.00_monomerB.out	-196.276		1.91787	2.02167	1.96977		2.026	2.062	2.09435		-0.108131	-0.00433022	-0.0562304		-0.144131	-0.0403302	-0.0922304		-0.17648	-0.0726801	-0.12458
39_Benzene-Cyclopentane_1.50_dimer.out	-428.196	39_Benzene-Cyclopentane_1.50_cpA.out	-196.277	39_Benzene-Cyclopentane_1.50_cpB.out	-231.919	39_Benzene-Cyclopentane_1.00_monomerA.out	-231.918	39_Benzene-Cyclopentane_1.00_monomerB.out	-196.276		0.806545	0.85606	0.831303		0.884	0.903	0.91841		-0.077455	-0.02794	-0.0526975		-0.096455	-0.04694	-0.0716975		-0.111865	-0.0623502	-0.0871077
39_Benzene-Cyclopentane_2.00_dimer.out	-428.195	39_Benzene-Cyclopentane_2.00_cpA.out	-196.276	39_Benzene-Cyclopentane_2.00_cpB.out	-231.919	39_Benzene-Cyclopentane_1.00_monomerA.out	-231.918	39_Benzene-Cyclopentane_1.00_monomerB.out	-196.276		0.170625	0.183872	0.177249		0.189	0.194	0.199481		-0.0183749	-0.00512777	-0.0117513		-0.0233749	-0.0101278	-0.0167513		-0.028856	-0.015609	-0.0222325
40_Benzene-Neopentane_0.90_dimer.out	-429.411	40_Benzene-Neopentane_0.90_cpA.out	-197.49	40_Benzene-Neopentane_0.90_cpB.out	-231.919	40_Benzene-Neopentane_1.00_monomerA.out	-231.919	40_Benzene-Neopentane_1.00_monomerB.out	-197.49		1.43807	1.70919	1.57363		1.712	1.753	1.85878		-0.273934	-0.00281089	-0.138373		-0.314934	-0.0438109	-0.179373		-0.42071	-0.149587	-0.285148
40_Benzene-Neopentane_0.95_dimer.out	-429.412	40_Benzene-Neopentane_0.95_cpA.out	-197.49	40_Benzene-Neopentane_0.95_cpB.out	-231.919	40_Benzene-Neopentane_1.00_monomerA.out	-231.919	40_Benzene-Neopentane_1.00_monomerB.out	-197.49		2.34602	2.57118	2.4586		2.549	2.597	2.68281		-0.202983	0.02218	-0.0904015		-0.250983	-0.02582	-0.138402		-0.336793	-0.11163	-0.224211
40_Benzene-Neopentane_1.00_dimer.out	-429.413	40_Benzene-Neopentane_1.00_cpA.out	-197.49	40_Benzene-Neopentane_1.00_cpB.out	-231.919	40_Benzene-Neopentane_1.00_monomerA.out	-231.919	40_Benzene-Neopentane_1.00_monomerB.out	-197.49		2.63187	2.81834	2.72511		2.791	2.839	2.90941		-0.159126	0.0273407	-0.0658927		-0.207126	-0.0206593	-0.113893		-0.277539	-0.0910722	-0.184306
40_Benzene-Neopentane_1.05_dimer.out	-429.413	40_Benzene-Neopentane_1.05_cpA.out	-197.49	40_Benzene-Neopentane_1.05_cpB.out	-231.919	40_Benzene-Neopentane_1.00_monomerA.out	-231.919	40_Benzene-Neopentane_1.00_monomerB.out	-197.49		2.58853	2.74418	2.66635		2.721	2.767	2.82401		-0.132472	0.0231755	-0.0546485		-0.178472	-0.0228245	-0.100648		-0.235482	-0.0798345	-0.157658
40_Benzene-Neopentane_1.10_dimer.out	-429.412	40_Benzene-Neopentane_1.10_cpA.out	-197.49	40_Benzene-Neopentane_1.10_cpB.out	-231.919	40_Benzene-Neopentane_1.00_monomerA.out	-231.919	40_Benzene-Neopentane_1.00_monomerB.out	-197.49		2.38524	2.51612	2.45068		2.502	2.544	2.59065		-0.116757	0.014125	-0.0513162		-0.158757	-0.027875	-0.0933162		-0.205405	-0.0745223	-0.139964
40_Benzene-Neopentane_1.25_dimer.out	-429.411	40_Benzene-Neopentane_1.25_cpA.out	-197.49	40_Benzene-Neopentane_1.25_cpB.out	-231.919	40_Benzene-Neopentane_1.00_monomerA.out	-231.919	40_Benzene-Neopentane_1.00_monomerB.out	-197.49		1.57348	1.65308	1.61328		1.674	1.703	1.72948		-0.100517	-0.0209168	-0.0607168		-0.129517	-0.0499168	-0.0897168		-0.155992	-0.0763923	-0.116192
40_Benzene-Neopentane_1.50_dimer.out	-429.409	40_Benzene-Neopentane_1.50_cpA.out	-197.49	40_Benzene-Neopentane_1.50_cpB.out	-231.919	40_Benzene-Neopentane_1.00_monomerA.out	-231.919	40_Benzene-Neopentane_1.00_monomerB.out	-197.49		0.683191	0.719691	0.701441		0.762	0.773	0.786207		-0.0788088	-0.0423089	-0.0605588		-0.0898088	-0.0533089	-0.0715588		-0.103016	-0.0665157	-0.0847656
40_Benzene-Neopentane_2.00_dimer.out	-429.409	40_Benzene-Neopentane_2.00_cpA.out	-197.49	40_Benzene-Neopentane_2.00_cpB.out	-231.919	40_Benzene-Neopentane_1.00_monomerA.out	-231.919	40_Benzene-Neopentane_1.00_monomerB.out	-197.49		0.167609	0.178541	0.173075		0.187	0.191	0.195601		-0.0193911	-0.00845947	-0.0139253		-0.0233911	-0.0124595	-0.0179253		-0.0279925	-0.0170608	-0.0225266
41_Uracil-Pentane_0.90_dimer.out	-611.851	41_Uracil-Pentane_0.90_cpA.out	-197.485	41_Uracil-Pentane_0.90_cpB.out	-414.362	41_Uracil-Pentane_1.00_monomerA.out	-414.362	41_Uracil-Pentane_1.00_monomerB.out	-197.484		2.77562	3.24888	3.01225		3.679	3.732	3.93232		-0.903382	-0.430119	-0.66675		-0.956382	-0.483119	-0.71975		-1.1567	-0.68344	-0.920072
41_Uracil-Pentane_0.95_dimer.out	-611.853	41_Uracil-Pentane_0.95_cpA.out	-197.484	41_Uracil-Pentane_0.95_cpB.out	-414.362	41_Uracil-Pentane_1.00_monomerA.out	-414.362	41_Uracil-Pentane_1.00_monomerB.out	-197.484		3.85712	4.26287	4.06		4.56	4.624	4.79242		-0.702882	-0.297127	-0.500005		-0.766882	-0.361127	-0.564005		-0.935299	-0.529544	-0.732422
41_Uracil-Pentane_1.00_dimer.out	-611.853	41_Uracil-Pentane_1.00_cpA.out	-197.484	41_Uracil-Pentane_1.00_cpB.out	-414.362	41_Uracil-Pentane_1.00_monomerA.out	-414.362	41_Uracil-Pentane_1.00_monomerB.out	-197.484		4.1678	4.51298	4.34039		4.724	4.792	4.93376		-0.556203	-0.21102	-0.383611		-0.624203	-0.27902	-0.451611		-0.765961	-0.420779	-0.59337
41_Uracil-Pentane_1.05_dimer.out	-611.853	41_Uracil-Pentane_1.05_cpA.out	-197.484	41_Uracil-Pentane_1.05_cpB.out	-414.362	41_Uracil-Pentane_1.00_monomerA.out	-414.362	41_Uracil-Pentane_1.00_monomerB.out	-197.484		4.05057	4.34409	4.19733		4.502	4.569	4.68928		-0.451434	-0.157909	-0.304671		-0.518434	-0.224909	-0.371671		-0.638714	-0.345189	-0.491951
41_Uracil-Pentane_1.10_dimer.out	-611.852	41_Uracil-Pentane_1.10_cpA.out	-197.484	41_Uracil-Pentane_1.10_cpB.out	-414.362	41_Uracil-Pentane_1.00_monomerA.out	-414.362	41_Uracil-Pentane_1.00_monomerB.out	-197.484		3.63685	3.88042	3.75863		3.999	4.064	4.1628		-0.362148	-0.118583	-0.240366		-0.427148	-0.183583	-0.305366		-0.525951	-0.282385	-0.404168
41_Uracil-Pentane_1.25_dimer.out	-611.85	41_Uracil-Pentane_1.25_cpA.out	-197.484	41_Uracil-Pentane_1.25_cpB.out	-414.362	41_Uracil-Pentane_1.00_monomerA.out	-414.362	41_Uracil-Pentane_1.00_monomerB.out	-197.484		2.16698	2.30853	2.23775		2.402	2.451	2.50794		-0.235018	-0.093475	-0.164246		-0.284018	-0.142475	-0.213246		-0.340958	-0.199415	-0.270187
41_Uracil-Pentane_1.50_dimer.out	-611.847	41_Uracil-Pentane_1.50_cpA.out	-197.484	41_Uracil-Pentane_1.50_cpB.out	-414.362	41_Uracil-Pentane_1.00_monomerA.out	-414.362	41_Uracil-Pentane_1.00_monomerB.out	-197.484		0.831287	0.896327	0.863807		0.961	0.986	1.01178		-0.129713	-0.0646729	-0.097193		-0.154713	-0.0896729	-0.122193		-0.180494	-0.115453	-0.147973
41_Uracil-Pentane_2.00_dimer.out	-611.846	41_Uracil-Pentane_2.00_cpA.out	-197.484	41_Uracil-Pentane_2.00_cpB.out	-414.362	41_Uracil-Pentane_1.00_monomerA.out	-414.362	41_Uracil-Pentane_1.00_monomerB.out	-197.484		0.184886	0.202027	0.193457		0.212	0.22	0.227902		-0.0271137	-0.00997259	-0.0185432		-0.0351137	-0.0179726	-0.0265432		-0.0430154	-0.0258743	-0.0344448
42_Uracil-Cyclopentane_0.90_dimer.out	-610.642	42_Uracil-Cyclopentane_0.90_cpA.out	-196.277	42_Uracil-Cyclopentane_0.90_cpB.out	-414.362	42_Uracil-Cyclopentane_1.00_monomerA.out	-414.362	42_Uracil-Cyclopentane_1.00_monomerB.out	-196.276		2.06952	2.51115	2.29034		2.9	2.963	3.14593		-0.830475	-0.388852	-0.609664		-0.893475	-0.451852	-0.672664		-1.0764	-0.634779	-0.855591
42_Uracil-Cyclopentane_0.95_dimer.out	-610.644	42_Uracil-Cyclopentane_0.95_cpA.out	-196.277	42_Uracil-Cyclopentane_0.95_cpB.out	-414.362	42_Uracil-Cyclopentane_1.00_monomerA.out	-414.362	42_Uracil-Cyclopentane_1.00_monomerB.out	-196.276		3.2005	3.5724	3.38645		3.836	3.91	4.06178		-0.635499	-0.263603	-0.449551		-0.709499	-0.337603	-0.523551		-0.861278	-0.489382	-0.67533
42_Uracil-Cyclopentane_1.00_dimer.out	-610.644	42_Uracil-Cyclopentane_1.00_cpA.out	-196.277	42_Uracil-Cyclopentane_1.00_cpB.out	-414.362	42_Uracil-Cyclopentane_1.00_monomerA.out	-414.362	42_Uracil-Cyclopentane_1.00_monomerB.out	-196.276		3.52176	3.83634	3.67905		4.019	4.094	4.22087		-0.49724	-0.182658	-0.339949		-0.57224	-0.257658	-0.414949		-0.699105	-0.384524	-0.541814
42_Uracil-Cyclopentane_1.05_dimer.out	-610.644	42_Uracil-Cyclopentane_1.05_cpA.out	-196.277	42_Uracil-Cyclopentane_1.05_cpB.out	-414.362	42_Uracil-Cyclopentane_1.00_monomerA.out	-414.362	42_Uracil-Cyclopentane_1.00_monomerB.out	-196.276		3.42368	3.69174	3.55771		3.823	3.895	4.00123		-0.39932	-0.131263	-0.265291		-0.47132	-0.203263	-0.337291		-0.577546	-0.309489	-0.443518
42_Uracil-Cyclopentane_1.10_dimer.out	-610.643	42_Uracil-Cyclopentane_1.10_cpA.out	-196.277	42_Uracil-Cyclopentane_1.10_cpB.out	-414.362	42_Uracil-Cyclopentane_1.00_monomerA.out	-414.362	42_Uracil-Cyclopentane_1.00_monomerB.out	-196.276		3.12766	3.35659	3.24212		3.459	3.526	3.61506		-0.331342	-0.102413	-0.216878		-0.398342	-0.169413	-0.283878		-0.487406	-0.258477	-0.372941
42_Uracil-Cyclopentane_1.25_dimer.out	-610.642	42_Uracil-Cyclopentane_1.25_cpA.out	-196.277	42_Uracil-Cyclopentane_1.25_cpB.out	-414.362	42_Uracil-Cyclopentane_1.00_monomerA.out	-414.362	42_Uracil-Cyclopentane_1.00_monomerB.out	-196.276		2.02708	2.17353	2.10031		2.249	2.298	2.35201		-0.221921	-0.0754676	-0.148694		-0.270921	-0.124468	-0.197694		-0.324935	-0.178482	-0.251709
42_Uracil-Cyclopentane_1.50_dimer.out	-610.64	42_Uracil-Cyclopentane_1.50_cpA.out	-196.277	42_Uracil-Cyclopentane_1.50_cpB.out	-414.362	42_Uracil-Cyclopentane_1.00_monomerA.out	-414.362	42_Uracil-Cyclopentane_1.00_monomerB.out	-196.276		0.867766	0.939222	0.903494		1	1.026	1.05203		-0.132234	-0.0607784	-0.0965061		-0.158234	-0.0867784	-0.122506		-0.184268	-0.112812	-0.14854
42_Uracil-Cyclopentane_2.00_dimer.out	-610.638	42_Uracil-Cyclopentane_2.00_cpA.out	-196.276	42_Uracil-Cyclopentane_2.00_cpB.out	-414.362	42_Uracil-Cyclopentane_1.00_monomerA.out	-414.362	42_Uracil-Cyclopentane_1.00_monomerB.out	-196.276		0.213492	0.235613	0.224552		0.246	0.253	0.262721		-0.0325083	-0.0103868	-0.0214475		-0.0395083	-0.0173868	-0.0284475		-0.0492289	-0.0271074	-0.0381681
43_Uracil-Neopentane_0.90_dimer.out	-611.855	43_Uracil-Neopentane_0.90_cpA.out	-197.49	43_Uracil-Neopentane_0.90_cpB.out	-414.362	43_Uracil-Neopentane_1.00_monomerA.out	-414.362	43_Uracil-Neopentane_1.00_monomerB.out	-197.49		2.12149	2.48066	2.30107		2.756	2.807	2.95433		-0.63451	-0.275342	-0.454926		-0.68551	-0.326342	-0.505926		-0.832844	-0.473676	-0.65326
43_Uracil-Neopentane_0.95_dimer.out	-611.857	43_Uracil-Neopentane_0.95_cpA.out	-197.49	43_Uracil-Neopentane_0.95_cpB.out	-414.362	43_Uracil-Neopentane_1.00_monomerA.out	-414.362	43_Uracil-Neopentane_1.00_monomerB.out	-197.49		3.0141	3.3184	3.16625		3.5	3.56	3.68368		-0.4859	-0.1816	-0.33375		-0.5459	-0.2416	-0.39375		-0.669576	-0.365276	-0.517426
43_Uracil-Neopentane_1.00_dimer.out	-611.857	43_Uracil-Neopentane_1.00_cpA.out	-197.49	43_Uracil-Neopentane_1.00_cpB.out	-414.362	43_Uracil-Neopentane_1.00_monomerA.out	-414.362	43_Uracil-Neopentane_1.00_monomerB.out	-197.49		3.23035	3.48634	3.35835		3.613	3.678	3.78166		-0.382645	-0.126663	-0.254654		-0.447645	-0.191663	-0.319654		-0.551303	-0.295321	-0.423312
43_Uracil-Neopentane_1.05_dimer.out	-611.857	43_Uracil-Neopentane_1.05_cpA.out	-197.49	43_Uracil-Neopentane_1.05_cpB.out	-414.362	43_Uracil-Neopentane_1.00_monomerA.out	-414.362	43_Uracil-Neopentane_1.00_monomerB.out	-197.49		3.10374	3.32167	3.21271		3.415	3.478	3.56649		-0.311259	-0.0933283	-0.202294		-0.374259	-0.156328	-0.265294		-0.462753	-0.244822	-0.353787
43_Uracil-Neopentane_1.10_dimer.out	-611.856	43_Uracil-Neopentane_1.10_cpA.out	-197.49	43_Uracil-Neopentane_1.10_cpB.out	-414.362	43_Uracil-Neopentane_1.00_monomerA.out	-414.362	43_Uracil-Neopentane_1.00_monomerB.out	-197.49		2.81968	3.00651	2.9131		3.083	3.142	3.21715		-0.263319	-0.0764869	-0.169903		-0.322319	-0.135487	-0.228903		-0.397465	-0.210632	-0.304049
43_Uracil-Neopentane_1.25_dimer.out	-611.854	43_Uracil-Neopentane_1.25_cpA.out	-197.49	43_Uracil-Neopentane_1.25_cpB.out	-414.362	43_Uracil-Neopentane_1.00_monomerA.out	-414.362	43_Uracil-Neopentane_1.00_monomerB.out	-197.49		1.82625	1.94418	1.88521		2.013	2.055	2.10216		-0.186749	-0.0688229	-0.127786		-0.228749	-0.110823	-0.169786		-0.275904	-0.157978	-0.216941
43_Uracil-Neopentane_1.50_dimer.out	-611.853	43_Uracil-Neopentane_1.50_cpA.out	-197.49	43_Uracil-Neopentane_1.50_cpB.out	-414.362	43_Uracil-Neopentane_1.00_monomerA.out	-414.362	43_Uracil-Neopentane_1.00_monomerB.out	-197.49		0.796404	0.853005	0.824705		0.912	0.932	0.955087		-0.115596	-0.0589952	-0.0872955		-0.135596	-0.0789952	-0.107295		-0.158683	-0.102082	-0.130383
43_Uracil-Neopentane_2.00_dimer.out	-611.852	43_Uracil-Neopentane_2.00_cpA.out	-197.49	43_Uracil-Neopentane_2.00_cpB.out	-414.362	43_Uracil-Neopentane_1.00_monomerA.out	-414.362	43_Uracil-Neopentane_1.00_monomerB.out	-197.49		0.201013	0.217584	0.209299		0.229	0.235	0.243577		-0.027987	-0.011416	-0.0197015		-0.033987	-0.017416	-0.0257015		-0.0425644	-0.0259934	-0.0342789
44_Ethene-Pentane_0.90_dimer.out	-275.96	44_Ethene-Pentane_0.90_cpA.out	-197.484	44_Ethene-Pentane_0.90_cpB.out	-78.4738	44_Ethene-Pentane_1.00_monomerA.out	-78.4737	44_Ethene-Pentane_1.00_monomerB.out	-197.484		1.31249	1.45777	1.38513		1.597	1.589	1.64737		-0.284508	-0.13923	-0.211869		-0.276508	-0.13123	-0.203869		-0.334876	-0.189598	-0.262237
44_Ethene-Pentane_0.95_dimer.out	-275.961	44_Ethene-Pentane_0.95_cpA.out	-197.484	44_Ethene-Pentane_0.95_cpB.out	-78.4738	44_Ethene-Pentane_1.00_monomerA.out	-78.4737	44_Ethene-Pentane_1.00_monomerB.out	-197.484		1.70518	1.82737	1.76628		1.918	1.918	1.96622		-0.212819	-0.0906312	-0.151725		-0.212819	-0.0906312	-0.151725		-0.261039	-0.138852	-0.199945
44_Ethene-Pentane_1.00_dimer.out	-275.961	44_Ethene-Pentane_1.00_cpA.out	-197.484	44_Ethene-Pentane_1.00_cpB.out	-78.4738	44_Ethene-Pentane_1.00_monomerA.out	-78.4737	44_Ethene-Pentane_1.00_monomerB.out	-197.484		1.77637	1.87787	1.82712		1.943	1.948	1.98672		-0.166625	-0.0651298	-0.115877		-0.171625	-0.0701298	-0.120877		-0.210341	-0.108846	-0.159594
44_Ethene-Pentane_1.05_dimer.out	-275.961	44_Ethene-Pentane_1.05_cpA.out	-197.484	44_Ethene-Pentane_1.05_cpB.out	-78.4738	44_Ethene-Pentane_1.00_monomerA.out	-78.4737	44_Ethene-Pentane_1.00_monomerB.out	-197.484		1.68501	1.77008	1.72754		1.822	1.83	1.86125		-0.136992	-0.0519211	-0.0944563		-0.144992	-0.0599211	-0.102456		-0.176239	-0.0911682	-0.133703
44_Ethene-Pentane_1.10_dimer.out	-275.961	44_Ethene-Pentane_1.10_cpA.out	-197.484	44_Ethene-Pentane_1.10_cpB.out	-78.4738	44_Ethene-Pentane_1.00_monomerA.out	-78.4737	44_Ethene-Pentane_1.00_monomerB.out	-197.484		1.52028	1.59193	1.5561		1.639	1.648	1.67396		-0.118724	-0.0470679	-0.0828958		-0.127724	-0.0560679	-0.0918958		-0.153687	-0.0820311	-0.117859
44_Ethene-Pentane_1.25_dimer.out	-275.96	44_Ethene-Pentane_1.25_cpA.out	-197.484	44_Ethene-Pentane_1.25_cpB.out	-78.4737	44_Ethene-Pentane_1.00_monomerA.out	-78.4737	44_Ethene-Pentane_1.00_monomerB.out	-197.484		0.973842	1.01833	0.996086		1.069	1.078	1.09294		-0.0951582	-0.0506695	-0.0729138		-0.104158	-0.0596695	-0.0819138		-0.119097	-0.0746081	-0.0968525
44_Ethene-Pentane_1.50_dimer.out	-275.959	44_Ethene-Pentane_1.50_cpA.out	-197.484	44_Ethene-Pentane_1.50_cpB.out	-78.4737	44_Ethene-Pentane_1.00_monomerA.out	-78.4737	44_Ethene-Pentane_1.00_monomerB.out	-197.484		0.415486	0.438136	0.426811		0.481	0.49	0.49698		-0.0655136	-0.0428636	-0.0541886		-0.0745136	-0.0518636	-0.0631886		-0.0814932	-0.0588431	-0.0701681
44_Ethene-Pentane_2.00_dimer.out	-275.958	44_Ethene-Pentane_2.00_cpA.out	-197.484	44_Ethene-Pentane_2.00_cpB.out	-78.4737	44_Ethene-Pentane_1.00_monomerA.out	-78.4737	44_Ethene-Pentane_1.00_monomerB.out	-197.484		0.100881	0.107048	0.103965		0.117	0.121	0.123279		-0.0161187	-0.0099517	-0.0130352		-0.0201187	-0.0139517	-0.0170352		-0.022398	-0.016231	-0.0193145
45_Ethyne-Pentane_0.90_dimer.out	-274.708	45_Ethyne-Pentane_0.90_cpA.out	-197.484	45_Ethyne-Pentane_0.90_cpB.out	-77.2225	45_Ethyne-Pentane_1.00_monomerA.out	-77.2224	45_Ethyne-Pentane_1.00_monomerB.out	-197.484		0.924911	1.07322	0.999067		0.992	0.997	1.04531		-0.067089	0.0812224	0.0070667		-0.072089	0.0762224	0.0020667		-0.120404	0.0279078	-0.0462479
45_Ethyne-Pentane_0.95_dimer.out	-274.709	45_Ethyne-Pentane_0.95_cpA.out	-197.484	45_Ethyne-Pentane_0.95_cpB.out	-77.2225	45_Ethyne-Pentane_1.00_monomerA.out	-77.2224	45_Ethyne-Pentane_1.00_monomerB.out	-197.484		1.47344	1.59542	1.53443		1.51	1.526	1.56349		-0.0365646	0.0854197	0.0244276		-0.0525646	0.0694197	0.00842755		-0.0900508	0.0319334	-0.0290587
45_Ethyne-Pentane_1.00_dimer.out	-274.709	45_Ethyne-Pentane_1.00_cpA.out	-197.484	45_Ethyne-Pentane_1.00_cpB.out	-77.2224	45_Ethyne-Pentane_1.00_monomerA.out	-77.2224	45_Ethyne-Pentane_1.00_monomerB.out	-197.484		1.62322	1.72347	1.67335		1.646	1.669	1.69762		-0.0227766	0.0774669	0.0273452		-0.0457766	0.0544669	0.00434517		-0.0744002	0.0258433	-0.0242785
45_Ethyne-Pentane_1.05_dimer.out	-274.709	45_Ethyne-Pentane_1.05_cpA.out	-197.484	45_Ethyne-Pentane_1.05_cpB.out	-77.2224	45_Ethyne-Pentane_1.00_monomerA.out	-77.2224	45_Ethyne-Pentane_1.00_monomerB.out	-197.484		1.57029	1.65322	1.61176		1.589	1.616	1.63779		-0.018709	0.0642247	0.0227578		-0.045709	0.0372247	-0.00424218		-0.0674946	0.0154391	-0.0260277
45_Ethyne-Pentane_1.10_dimer.out	-274.709	45_Ethyne-Pentane_1.10_cpA.out	-197.484	45_Ethyne-Pentane_1.10_cpB.out	-77.2224	45_Ethyne-Pentane_1.00_monomerA.out	-77.2224	45_Ethyne-Pentane_1.00_monomerB.out	-197.484		1.42364	1.49346	1.45855		1.444	1.473	1.48983		-0.0203623	0.0494594	0.0145486		-0.0493623	0.0204594	-0.0144514		-0.0661895	0.00363215	-0.0312787
45_Ethyne-Pentane_1.25_dimer.out	-274.708	45_Ethyne-Pentane_1.25_cpA.out	-197.484	45_Ethyne-Pentane_1.25_cpB.out	-77.2224	45_Ethyne-Pentane_1.00_monomerA.out	-77.2224	45_Ethyne-Pentane_1.00_monomerB.out	-197.484		0.898887	0.94246	0.920674		0.932	0.958	0.966266		-0.033113	0.0104603	-0.0113263		-0.059113	-0.0155397	-0.0373263		-0.0673789	-0.0238057	-0.0455923
45_Ethyne-Pentane_1.50_dimer.out	-274.707	45_Ethyne-Pentane_1.50_cpA.out	-197.484	45_Ethyne-Pentane_1.50_cpB.out	-77.2224	45_Ethyne-Pentane_1.00_monomerA.out	-77.2224	45_Ethyne-Pentane_1.00_monomerB.out	-197.484		0.369947	0.390593	0.38027		0.4	0.418	0.420584		-0.0300529	-0.00940698	-0.01973		-0.0480529	-0.027407	-0.03773		-0.0506368	-0.0299908	-0.0403138
45_Ethyne-Pentane_2.00_dimer.out	-274.707	45_Ethyne-Pentane_2.00_cpA.out	-197.484	45_Ethyne-Pentane_2.00_cpB.out	-77.2224	45_Ethyne-Pentane_1.00_monomerA.out	-77.2224	45_Ethyne-Pentane_1.00_monomerB.out	-197.484		0.0867598	0.0922125	0.0894861		0.092	0.097	0.0981162		-0.00524021	0.000212503	-0.00251385		-0.0102402	-0.0047875	-0.00751385		-0.0113564	-0.00590371	-0.00863006
46_Peptide-Pentane_0.90_dimer.out	-445.723	46_Peptide-Pentane_0.90_cpA.out	-197.484	46_Peptide-Pentane_0.90_cpB.out	-248.234	46_Peptide-Pentane_1.00_monomerA.out	-248.233	46_Peptide-Pentane_1.00_monomerB.out	-197.484		2.90069	3.22359	3.06214		3.655	3.673	3.81429		-0.754312	-0.431405	-0.592859		-0.772312	-0.449405	-0.610859		-0.913607	-0.5907	-0.752153
46_Peptide-Pentane_0.95_dimer.out	-445.724	46_Peptide-Pentane_0.95_cpA.out	-197.484	46_Peptide-Pentane_0.95_cpB.out	-248.234	46_Peptide-Pentane_1.00_monomerA.out	-248.233	46_Peptide-Pentane_1.00_monomerB.out	-197.484		3.51118	3.78933	3.65025		4.115	4.144	4.26368		-0.603824	-0.325669	-0.464747		-0.632824	-0.354669	-0.493747		-0.752499	-0.474344	-0.613422
46_Peptide-Pentane_1.00_dimer.out	-445.724	46_Peptide-Pentane_1.00_cpA.out	-197.484	46_Peptide-Pentane_1.00_cpB.out	-248.234	46_Peptide-Pentane_1.00_monomerA.out	-248.233	46_Peptide-Pentane_1.00_monomerB.out	-197.484		3.67078	3.91166	3.79122		4.162	4.195	4.29754		-0.491217	-0.250339	-0.370778		-0.524217	-0.283339	-0.403778		-0.626755	-0.385877	-0.506316
46_Peptide-Pentane_1.05_dimer.out	-445.724	46_Peptide-Pentane_1.05_cpA.out	-197.484	46_Peptide-Pentane_1.05_cpB.out	-248.234	46_Peptide-Pentane_1.00_monomerA.out	-248.233	46_Peptide-Pentane_1.00_monomerB.out	-197.484		3.5669	3.77767	3.67229		3.974	4.009	4.09624		-0.407099	-0.196328	-0.301714		-0.442099	-0.231328	-0.336714		-0.529339	-0.318568	-0.423954
46_Peptide-Pentane_1.10_dimer.out	-445.723	46_Peptide-Pentane_1.10_cpA.out	-197.484	46_Peptide-Pentane_1.10_cpB.out	-248.234	46_Peptide-Pentane_1.00_monomerA.out	-248.233	46_Peptide-Pentane_1.00_monomerB.out	-197.484		3.31951	3.50339	3.41145		3.665	3.7	3.77452		-0.345488	-0.161612	-0.25355		-0.380488	-0.196612	-0.28855		-0.455007	-0.271132	-0.363069
46_Peptide-Pentane_1.25_dimer.out	-445.722	46_Peptide-Pentane_1.25_cpA.out	-197.484	46_Peptide-Pentane_1.25_cpB.out	-248.233	46_Peptide-Pentane_1.00_monomerA.out	-248.233	46_Peptide-Pentane_1.00_monomerB.out	-197.484		2.34374	2.46595	2.40484		2.586	2.615	2.66244		-0.242263	-0.120048	-0.181156		-0.271263	-0.149048	-0.210156		-0.318707	-0.196492	-0.257599
46_Peptide-Pentane_1.50_dimer.out	-445.719	46_Peptide-Pentane_1.50_cpA.out	-197.484	46_Peptide-Pentane_1.50_cpB.out	-248.233	46_Peptide-Pentane_1.00_monomerA.out	-248.233	46_Peptide-Pentane_1.00_monomerB.out	-197.484		1.02337	1.08191	1.05264		1.172	1.19	1.21242		-0.148628	-0.0900867	-0.119357		-0.166628	-0.108087	-0.137357		-0.189046	-0.130505	-0.159775
46_Peptide-Pentane_2.00_dimer.out	-445.718	46_Peptide-Pentane_2.00_cpA.out	-197.484	46_Peptide-Pentane_2.00_cpB.out	-248.233	46_Peptide-Pentane_1.00_monomerA.out	-248.233	46_Peptide-Pentane_1.00_monomerB.out	-197.484		0.246721	0.264363	0.255542		0.282	0.29	0.297776		-0.0352793	-0.0176368	-0.0264581		-0.0432793	-0.0256368	-0.0344581		-0.0510557	-0.0334133	-0.0422345
47_Benzene-Benzene_TS_0.90_dimer.out	-463.84	47_Benzene-Benzene_TS_0.90_cpA.out	-231.919	47_Benzene-Benzene_TS_0.90_cpB.out	-231.919	47_Benzene-Benzene_TS_1.00_monomerA.out	-231.918	47_Benzene-Benzene_TS_1.00_monomerB.out	-231.918		1.33899	1.6348	1.48689		1.493	1.549	1.65707		-0.154013	0.141797	-0.00610768		-0.210013	0.0857973	-0.0621077		-0.318082	-0.022272	-0.170177
47_Benzene-Benzene_TS_0.95_dimer.out	-463.841	47_Benzene-Benzene_TS_0.95_cpA.out	-231.919	47_Benzene-Benzene_TS_0.95_cpB.out	-231.919	47_Benzene-Benzene_TS_1.00_monomerA.out	-231.918	47_Benzene-Benzene_TS_1.00_monomerB.out	-231.918		2.34713	2.59727	2.4722		2.452	2.513	2.6025		-0.104867	0.145274	0.0202036		-0.165867	0.0842741	-0.0407964		-0.255369	-0.00522784	-0.130298
47_Benzene-Benzene_TS_1.00_dimer.out	-463.842	47_Benzene-Benzene_TS_1.00_cpA.out	-231.919	47_Benzene-Benzene_TS_1.00_cpB.out	-231.919	47_Benzene-Benzene_TS_1.00_monomerA.out	-231.918	47_Benzene-Benzene_TS_1.00_monomerB.out	-231.918		2.68642	2.8983	2.79236		2.762	2.823	2.89781		-0.0755751	0.1363	0.0303624		-0.136575	0.0753	-0.0306376		-0.211382	0.000492808	-0.105445
47_Benzene-Benzene_TS_1.05_dimer.out	-463.842	47_Benzene-Benzene_TS_1.05_cpA.out	-231.919	47_Benzene-Benzene_TS_1.05_cpB.out	-231.919	47_Benzene-Benzene_TS_1.00_monomerA.out	-231.918	47_Benzene-Benzene_TS_1.00_monomerB.out	-231.918		2.6716	2.84971	2.76066		2.731	2.79	2.8525		-0.0593997	0.118715	0.0296574		-0.1184	0.0597146	-0.0293426		-0.180901	-0.00278655	-0.0918437
47_Benzene-Benzene_TS_1.10_dimer.out	-463.841	47_Benzene-Benzene_TS_1.10_cpA.out	-231.919	47_Benzene-Benzene_TS_1.10_cpB.out	-231.919	47_Benzene-Benzene_TS_1.00_monomerA.out	-231.918	47_Benzene-Benzene_TS_1.00_monomerB.out	-231.918		2.48271	2.63326	2.55798		2.536	2.59	2.64267		-0.053287	0.0972554	0.0219842		-0.107287	0.0432554	-0.0320158		-0.15996	-0.00941757	-0.0846887
47_Benzene-Benzene_TS_1.25_dimer.out	-463.84	47_Benzene-Benzene_TS_1.25_cpA.out	-231.919	47_Benzene-Benzene_TS_1.25_cpB.out	-231.919	47_Benzene-Benzene_TS_1.00_monomerA.out	-231.918	47_Benzene-Benzene_TS_1.00_monomerB.out	-231.918		1.67837	1.77274	1.72555		1.734	1.772	1.80356		-0.0556315	0.0387365	-0.00844749		-0.0936315	0.000736531	-0.0464475		-0.125195	-0.0308267	-0.0780107
47_Benzene-Benzene_TS_1.50_dimer.out	-463.838	47_Benzene-Benzene_TS_1.50_cpA.out	-231.919	47_Benzene-Benzene_TS_1.50_cpB.out	-231.919	47_Benzene-Benzene_TS_1.00_monomerA.out	-231.918	47_Benzene-Benzene_TS_1.00_monomerB.out	-231.918		0.767493	0.814465	0.790979		0.818	0.839	0.855794		-0.050507	-0.00353469	-0.0270209		-0.071507	-0.0245347	-0.0480209		-0.0883006	-0.0413283	-0.0648144
47_Benzene-Benzene_TS_2.00_dimer.out	-463.837	47_Benzene-Benzene_TS_2.00_cpA.out	-231.919	47_Benzene-Benzene_TS_2.00_cpB.out	-231.919	47_Benzene-Benzene_TS_1.00_monomerA.out	-231.918	47_Benzene-Benzene_TS_1.00_monomerB.out	-231.918		0.209218	0.223386	0.216302		0.222	0.23	0.237012		-0.0127819	0.00138642	-0.00569773		-0.0207819	-0.00661358	-0.0136977		-0.0277935	-0.0136252	-0.0207093
48_Pyridine-Pyridine_TS_0.90_dimer.out	-495.901	48_Pyridine-Pyridine_TS_0.90_cpA.out	-247.949	48_Pyridine-Pyridine_TS_0.90_cpB.out	-247.949	48_Pyridine-Pyridine_TS_1.00_monomerA.out	-247.949	48_Pyridine-Pyridine_TS_1.00_monomerB.out	-247.949		2.22441	2.50419	2.3643		2.402	2.444	2.54666		-0.177595	0.102195	-0.0377002		-0.219595	0.0601946	-0.0797002		-0.322257	-0.0424676	-0.182362
48_Pyridine-Pyridine_TS_0.95_dimer.out	-495.903	48_Pyridine-Pyridine_TS_0.95_cpA.out	-247.949	48_Pyridine-Pyridine_TS_0.95_cpB.out	-247.949	48_Pyridine-Pyridine_TS_1.00_monomerA.out	-247.949	48_Pyridine-Pyridine_TS_1.00_monomerB.out	-247.949		3.07494	3.3122	3.19357		3.199	3.248	3.33554		-0.124059	0.113198	-0.00543045		-0.173059	0.0641983	-0.0544304		-0.260595	-0.0233376	-0.141966
48_Pyridine-Pyridine_TS_1.00_dimer.out	-495.903	48_Pyridine-Pyridine_TS_1.00_cpA.out	-247.949	48_Pyridine-Pyridine_TS_1.00_cpB.out	-247.949	48_Pyridine-Pyridine_TS_1.00_monomerA.out	-247.949	48_Pyridine-Pyridine_TS_1.00_monomerB.out	-247.949		3.35162	3.55418	3.4529		3.44	3.492	3.56603		-0.0883835	0.114179	0.0128979		-0.140384	0.0621793	-0.0391021		-0.214412	-0.0118489	-0.11313
48_Pyridine-Pyridine_TS_1.05_dimer.out	-495.903	48_Pyridine-Pyridine_TS_1.05_cpA.out	-247.949	48_Pyridine-Pyridine_TS_1.05_cpB.out	-247.949	48_Pyridine-Pyridine_TS_1.00_monomerA.out	-247.949	48_Pyridine-Pyridine_TS_1.00_monomerB.out	-247.949		3.3077	3.48076	3.39423		3.375	3.426	3.48901		-0.067296	0.10576	0.0192318		-0.118296	0.0547596	-0.0317682		-0.181301	-0.00824543	-0.0947732
48_Pyridine-Pyridine_TS_1.10_dimer.out	-495.903	48_Pyridine-Pyridine_TS_1.10_cpA.out	-247.949	48_Pyridine-Pyridine_TS_1.10_cpB.out	-247.949	48_Pyridine-Pyridine_TS_1.00_monomerA.out	-247.949	48_Pyridine-Pyridine_TS_1.00_monomerB.out	-247.949		3.09701	3.24654	3.17178		3.154	3.202	3.25501		-0.0569919	0.0925442	0.0177762		-0.104992	0.0445442	-0.0302238		-0.158003	-0.00846633	-0.0832344
48_Pyridine-Pyridine_TS_1.25_dimer.out	-495.901	48_Pyridine-Pyridine_TS_1.25_cpA.out	-247.949	48_Pyridine-Pyridine_TS_1.25_cpB.out	-247.949	48_Pyridine-Pyridine_TS_1.00_monomerA.out	-247.949	48_Pyridine-Pyridine_TS_1.00_monomerB.out	-247.949		2.2058	2.30398	2.25489		2.259	2.294	2.32764		-0.0531982	0.044975	-0.00411158		-0.0881982	0.00997505	-0.0391116		-0.121836	-0.0236623	-0.0727489
48_Pyridine-Pyridine_TS_1.50_dimer.out	-495.899	48_Pyridine-Pyridine_TS_1.50_cpA.out	-247.949	48_Pyridine-Pyridine_TS_1.50_cpB.out	-247.949	48_Pyridine-Pyridine_TS_1.00_monomerA.out	-247.949	48_Pyridine-Pyridine_TS_1.00_monomerB.out	-247.949		1.1158	1.16725	1.14152		1.168	1.188	1.20594		-0.052205	-0.000750424	-0.0264777		-0.072205	-0.0207504	-0.0464777		-0.0901421	-0.0386876	-0.0644149
48_Pyridine-Pyridine_TS_2.00_dimer.out	-495.898	48_Pyridine-Pyridine_TS_2.00_cpA.out	-247.949	48_Pyridine-Pyridine_TS_2.00_cpB.out	-247.949	48_Pyridine-Pyridine_TS_1.00_monomerA.out	-247.949	48_Pyridine-Pyridine_TS_1.00_monomerB.out	-247.949		0.356102	0.375074	0.365588		0.37	0.378	0.384102		-0.0138982	0.00507373	-0.00441223		-0.0218982	-0.00292627	-0.0124122		-0.0280003	-0.00902841	-0.0185144
49_Benzene-Pyridine_TS_0.90_dimer.out	-479.871	49_Benzene-Pyridine_TS_0.90_cpA.out	-247.949	49_Benzene-Pyridine_TS_0.90_cpB.out	-231.919	49_Benzene-Pyridine_TS_1.00_monomerA.out	-231.918	49_Benzene-Pyridine_TS_1.00_monomerB.out	-247.949		1.80668	2.1043	1.95549		1.945	1.992	2.09912		-0.138319	0.159297	0.0104891		-0.185319	0.112297	-0.0365109		-0.292437	0.00517881	-0.143629
49_Benzene-Pyridine_TS_0.95_dimer.out	-479.872	49_Benzene-Pyridine_TS_0.95_cpA.out	-247.949	49_Benzene-Pyridine_TS_0.95_cpB.out	-231.919	49_Benzene-Pyridine_TS_1.00_monomerA.out	-231.918	49_Benzene-Pyridine_TS_1.00_monomerB.out	-247.949		2.83306	3.08488	2.95897		2.922	2.975	3.0636		-0.0889422	0.162881	0.0369693		-0.141942	0.109881	-0.0160307		-0.230539	0.0212837	-0.104628
49_Benzene-Pyridine_TS_1.00_dimer.out	-479.873	49_Benzene-Pyridine_TS_1.00_cpA.out	-247.949	49_Benzene-Pyridine_TS_1.00_cpB.out	-231.919	49_Benzene-Pyridine_TS_1.00_monomerA.out	-231.918	49_Benzene-Pyridine_TS_1.00_monomerB.out	-247.949		3.16692	3.38009	3.2735		3.226	3.28	3.35433		-0.0590781	0.154087	0.0475043		-0.113078	0.100087	-0.00649566		-0.187404	0.0257609	-0.0808215
49_Benzene-Pyridine_TS_1.05_dimer.out	-479.873	49_Benzene-Pyridine_TS_1.05_cpA.out	-247.949	49_Benzene-Pyridine_TS_1.05_cpB.out	-231.919	49_Benzene-Pyridine_TS_1.00_monomerA.out	-231.918	49_Benzene-Pyridine_TS_1.00_monomerB.out	-247.949		3.13268	3.31281	3.22274		3.176	3.229	3.29112		-0.0433238	0.13681	0.0467432		-0.0963238	0.0838102	-0.00625682		-0.158447	0.0216868	-0.0683802
49_Benzene-Pyridine_TS_1.10_dimer.out	-479.872	49_Benzene-Pyridine_TS_1.10_cpA.out	-247.949	49_Benzene-Pyridine_TS_1.10_cpB.out	-231.919	49_Benzene-Pyridine_TS_1.00_monomerA.out	-231.918	49_Benzene-Pyridine_TS_1.00_monomerB.out	-247.949		2.91727	3.06908	2.99318		2.955	3.004	3.05632		-0.037726	0.114083	0.0381783		-0.086726	0.0650826	-0.0108217		-0.139046	0.0127622	-0.0631422
49_Benzene-Pyridine_TS_1.25_dimer.out	-479.871	49_Benzene-Pyridine_TS_1.25_cpA.out	-247.949	49_Benzene-Pyridine_TS_1.25_cpB.out	-231.919	49_Benzene-Pyridine_TS_1.00_monomerA.out	-231.918	49_Benzene-Pyridine_TS_1.00_monomerB.out	-247.949		2.02424	2.11962	2.07193		2.068	2.103	2.13397		-0.043757	0.0516227	0.0039328		-0.078757	0.0166227	-0.0310672		-0.109731	-0.014351	-0.0620408
49_Benzene-Pyridine_TS_1.50_dimer.out	-479.869	49_Benzene-Pyridine_TS_1.50_cpA.out	-247.949	49_Benzene-Pyridine_TS_1.50_cpB.out	-231.919	49_Benzene-Pyridine_TS_1.00_monomerA.out	-231.918	49_Benzene-Pyridine_TS_1.00_monomerB.out	-247.949		0.997345	1.04598	1.02166		1.042	1.06	1.07499		-0.044655	0.00397999	-0.0203375		-0.062655	-0.01402	-0.0383375		-0.077644	-0.029009	-0.0533265
49_Benzene-Pyridine_TS_2.00_dimer.out	-479.868	49_Benzene-Pyridine_TS_2.00_cpA.out	-247.949	49_Benzene-Pyridine_TS_2.00_cpB.out	-231.919	49_Benzene-Pyridine_TS_1.00_monomerA.out	-231.918	49_Benzene-Pyridine_TS_1.00_monomerB.out	-247.949		0.322496	0.337423	0.329959		0.332	0.339	0.344899		-0.00950437	0.00542336	-0.00204051		-0.0165044	-0.00157664	-0.00904051		-0.0224033	-0.00747557	-0.0149394
50_Benzene-Ethyne_CH-pi_0.90_dimer.out	-309.144	50_Benzene-Ethyne_CH-pi_0.90_cpA.out	-77.2224	50_Benzene-Ethyne_CH-pi_0.90_cpB.out	-231.919	50_Benzene-Ethyne_CH-pi_1.00_monomerA.out	-231.918	50_Benzene-Ethyne_CH-pi_1.00_monomerB.out	-77.2223		1.83909	2.03846	1.93877		1.791	1.784	1.84672		0.0480888	0.247458	0.147774		0.0550888	0.254458	0.154774		-0.00763204	0.191738	0.0920528
50_Benzene-Ethyne_CH-pi_0.95_dimer.out	-309.145	50_Benzene-Ethyne_CH-pi_0.95_cpA.out	-77.2224	50_Benzene-Ethyne_CH-pi_0.95_cpB.out	-231.919	50_Benzene-Ethyne_CH-pi_1.00_monomerA.out	-231.918	50_Benzene-Ethyne_CH-pi_1.00_monomerB.out	-77.2223		2.64278	2.80869	2.72574		2.58	2.585	2.63638		0.0627849	0.228685	0.145735		0.0577849	0.223685	0.140735		0.00640657	0.172307	0.0893568
50_Benzene-Ethyne_CH-pi_1.00_dimer.out	-309.146	50_Benzene-Ethyne_CH-pi_1.00_cpA.out	-77.2224	50_Benzene-Ethyne_CH-pi_1.00_cpB.out	-231.919	50_Benzene-Ethyne_CH-pi_1.00_monomerA.out	-231.918	50_Benzene-Ethyne_CH-pi_1.00_monomerB.out	-77.2223		2.87457	3.01375	2.94416		2.81	2.822	2.86486		0.0645679	0.20375	0.134159		0.0525679	0.19175	0.122159		0.00970454	0.148887	0.0792958
50_Benzene-Ethyne_CH-pi_1.05_dimer.out	-309.145	50_Benzene-Ethyne_CH-pi_1.05_cpA.out	-77.2224	50_Benzene-Ethyne_CH-pi_1.05_cpB.out	-231.919	50_Benzene-Ethyne_CH-pi_1.00_monomerA.out	-231.918	50_Benzene-Ethyne_CH-pi_1.00_monomerB.out	-77.2223		2.80438	2.92187	2.86312		2.747	2.764	2.79952		0.0573828	0.174865	0.116124		0.0403828	0.157865	0.099124		0.00486084	0.122343	0.063602
50_Benzene-Ethyne_CH-pi_1.10_dimer.out	-309.145	50_Benzene-Ethyne_CH-pi_1.10_cpA.out	-77.2224	50_Benzene-Ethyne_CH-pi_1.10_cpB.out	-231.919	50_Benzene-Ethyne_CH-pi_1.00_monomerA.out	-231.918	50_Benzene-Ethyne_CH-pi_1.00_monomerB.out	-77.2223		2.59049	2.68897	2.63973		2.545	2.563	2.59289		0.0454861	0.143968	0.094727		0.0274861	0.125968	0.076727		-0.00240401	0.0960779	0.0468369
50_Benzene-Ethyne_CH-pi_1.25_dimer.out	-309.144	50_Benzene-Ethyne_CH-pi_1.25_cpA.out	-77.2224	50_Benzene-Ethyne_CH-pi_1.25_cpB.out	-231.919	50_Benzene-Ethyne_CH-pi_1.00_monomerA.out	-231.918	50_Benzene-Ethyne_CH-pi_1.00_monomerB.out	-77.2223		1.77618	1.83887	1.80753		1.772	1.785	1.80226		0.0041826	0.0668739	0.0355282		-0.0088174	0.0538739	0.0225282		-0.0260748	0.0366165	0.00527086
50_Benzene-Ethyne_CH-pi_1.50_dimer.out	-309.142	50_Benzene-Ethyne_CH-pi_1.50_cpA.out	-77.2224	50_Benzene-Ethyne_CH-pi_1.50_cpB.out	-231.919	50_Benzene-Ethyne_CH-pi_1.00_monomerA.out	-231.918	50_Benzene-Ethyne_CH-pi_1.00_monomerB.out	-77.2223		0.870041	0.902402	0.886222		0.89	0.895	0.902823		-0.0199586	0.0124021	-0.00377824		-0.0249586	0.00740215	-0.00877824		-0.032782	-0.000421263	-0.0166017
50_Benzene-Ethyne_CH-pi_2.00_dimer.out	-309.141	50_Benzene-Ethyne_CH-pi_2.00_cpA.out	-77.2223	50_Benzene-Ethyne_CH-pi_2.00_cpB.out	-231.918	50_Benzene-Ethyne_CH-pi_1.00_monomerA.out	-231.918	50_Benzene-Ethyne_CH-pi_1.00_monomerB.out	-77.2223		0.268171	0.277682	0.272926		0.272	0.274	0.277246		-0.00382926	0.0056817	0.00092622		-0.00582926	0.0036817	-0.00107378		-0.00907543	0.000435525	-0.00431995
51_Ethyne-Ethyne_TS_0.90_dimer.out	-154.447	51_Ethyne-Ethyne_TS_0.90_cpA.out	-77.2224	51_Ethyne-Ethyne_TS_0.90_cpB.out	-77.2224	51_Ethyne-Ethyne_TS_1.00_monomerA.out	-77.2224	51_Ethyne-Ethyne_TS_1.00_monomerB.out	-77.2223		1.27452	1.34591	1.31021		1.17	1.183	1.20308		0.104515	0.175913	0.140214		0.0915155	0.162913	0.127214		0.0714348	0.142832	0.107133
51_Ethyne-Ethyne_TS_0.95_dimer.out	-154.447	51_Ethyne-Ethyne_TS_0.95_cpA.out	-77.2224	51_Ethyne-Ethyne_TS_0.95_cpB.out	-77.2224	51_Ethyne-Ethyne_TS_1.00_monomerA.out	-77.2224	51_Ethyne-Ethyne_TS_1.00_monomerB.out	-77.2223		1.52818	1.58828	1.55823		1.434	1.449	1.46352		0.0941823	0.154282	0.124232		0.0791823	0.139282	0.109232		0.0646646	0.124764	0.0947145
51_Ethyne-Ethyne_TS_1.00_dimer.out	-154.447	51_Ethyne-Ethyne_TS_1.00_cpA.out	-77.2224	51_Ethyne-Ethyne_TS_1.00_cpB.out	-77.2224	51_Ethyne-Ethyne_TS_1.00_monomerA.out	-77.2224	51_Ethyne-Ethyne_TS_1.00_monomerB.out	-77.2223		1.57047	1.62189	1.59618		1.489	1.506	1.51585		0.0814684	0.132887	0.107178		0.0644684	0.115887	0.0901776		0.0546213	0.10604	0.0803304
51_Ethyne-Ethyne_TS_1.05_dimer.out	-154.447	51_Ethyne-Ethyne_TS_1.05_cpA.out	-77.2224	51_Ethyne-Ethyne_TS_1.05_cpB.out	-77.2224	51_Ethyne-Ethyne_TS_1.00_monomerA.out	-77.2224	51_Ethyne-Ethyne_TS_1.00_monomerB.out	-77.2223		1.49814	1.54252	1.52033		1.431	1.449	1.4559		0.0671406	0.111524	0.0893322		0.0491406	0.0935238	0.0713322		0.0422371	0.0866203	0.0644287
51_Ethyne-Ethyne_TS_1.10_dimer.out	-154.447	51_Ethyne-Ethyne_TS_1.10_cpA.out	-77.2224	51_Ethyne-Ethyne_TS_1.10_cpB.out	-77.2224	51_Ethyne-Ethyne_TS_1.00_monomerA.out	-77.2224	51_Ethyne-Ethyne_TS_1.00_monomerB.out	-77.2223		1.37014	1.40848	1.38931		1.318	1.335	1.34111		0.0521419	0.0904812	0.0713116		0.0351419	0.0734812	0.0543116		0.0290273	0.0673665	0.0481969
51_Ethyne-Ethyne_TS_1.25_dimer.out	-154.446	51_Ethyne-Ethyne_TS_1.25_cpA.out	-77.2224	51_Ethyne-Ethyne_TS_1.25_cpB.out	-77.2224	51_Ethyne-Ethyne_TS_1.00_monomerA.out	-77.2224	51_Ethyne-Ethyne_TS_1.00_monomerB.out	-77.2223		0.931447	0.956269	0.943858		0.913	0.93	0.933765		0.0184474	0.0432687	0.0308581		0.00144741	0.0262687	0.0138581		-0.00231779	0.0225035	0.0100929
51_Ethyne-Ethyne_TS_1.50_dimer.out	-154.445	51_Ethyne-Ethyne_TS_1.50_cpA.out	-77.2224	51_Ethyne-Ethyne_TS_1.50_cpB.out	-77.2224	51_Ethyne-Ethyne_TS_1.00_monomerA.out	-77.2224	51_Ethyne-Ethyne_TS_1.00_monomerB.out	-77.2223		0.450197	0.46374	0.456968		0.452	0.462	0.46263		-0.00180325	0.0117401	0.00496844		-0.0118032	0.00174012	-0.00503156		-0.0124334	0.00110997	-0.00566171
51_Ethyne-Ethyne_TS_2.00_dimer.out	-154.445	51_Ethyne-Ethyne_TS_2.00_cpA.out	-77.2224	51_Ethyne-Ethyne_TS_2.00_cpB.out	-77.2224	51_Ethyne-Ethyne_TS_1.00_monomerA.out	-77.2224	51_Ethyne-Ethyne_TS_1.00_monomerB.out	-77.2223		0.132484	0.136053	0.134268		0.134	0.135	0.135484		-0.00151599	0.00205297	0.000268488		-0.00251599	0.00105297	-0.000731512		-0.00299976	0.000569204	-0.00121528
52_Benzene-AcOH_OH-pi_0.90_dimer.out	-460.775	52_Benzene-AcOH_OH-pi_0.90_cpA.out	-228.851	52_Benzene-AcOH_OH-pi_0.90_cpB.out	-231.919	52_Benzene-AcOH_OH-pi_1.00_monomerA.out	-231.918	52_Benzene-AcOH_OH-pi_1.00_monomerB.out	-228.85		3.65237	3.93606	3.79422		3.908	3.895	4.00161		-0.255628	0.0280603	-0.113784		-0.242628	0.0410603	-0.100784		-0.349239	-0.0655504	-0.207395
52_Benzene-AcOH_OH-pi_0.95_dimer.out	-460.776	52_Benzene-AcOH_OH-pi_0.95_cpA.out	-228.851	52_Benzene-AcOH_OH-pi_0.95_cpB.out	-231.919	52_Benzene-AcOH_OH-pi_1.00_monomerA.out	-231.918	52_Benzene-AcOH_OH-pi_1.00_monomerB.out	-228.85		4.33368	4.57486	4.45427		4.525	4.523	4.6131		-0.191319	0.0498616	-0.0707285		-0.189319	0.0518616	-0.0687285		-0.27942	-0.03824	-0.15883
52_Benzene-AcOH_OH-pi_1.00_dimer.out	-460.776	52_Benzene-AcOH_OH-pi_1.00_cpA.out	-228.851	52_Benzene-AcOH_OH-pi_1.00_cpB.out	-231.919	52_Benzene-AcOH_OH-pi_1.00_monomerA.out	-231.918	52_Benzene-AcOH_OH-pi_1.00_monomerB.out	-228.85		4.50984	4.71542	4.61263		4.655	4.661	4.73718		-0.145164	0.0604247	-0.0423695		-0.151164	0.0544247	-0.0483695		-0.227345	-0.021757	-0.124551
52_Benzene-AcOH_OH-pi_1.05_dimer.out	-460.776	52_Benzene-AcOH_OH-pi_1.05_cpA.out	-228.851	52_Benzene-AcOH_OH-pi_1.05_cpB.out	-231.919	52_Benzene-AcOH_OH-pi_1.00_monomerA.out	-231.918	52_Benzene-AcOH_OH-pi_1.00_monomerB.out	-228.85		4.39399	4.56969	4.48184		4.508	4.519	4.58343		-0.114005	0.0616869	-0.0261592		-0.125005	0.0506869	-0.0371592		-0.189435	-0.0137431	-0.101589
52_Benzene-AcOH_OH-pi_1.10_dimer.out	-460.776	52_Benzene-AcOH_OH-pi_1.10_cpA.out	-228.851	52_Benzene-AcOH_OH-pi_1.10_cpB.out	-231.919	52_Benzene-AcOH_OH-pi_1.00_monomerA.out	-231.918	52_Benzene-AcOH_OH-pi_1.00_monomerB.out	-228.85		4.12047	4.27102	4.19574		4.213	4.228	4.28292		-0.0925345	0.0580198	-0.0172573		-0.107534	0.0430198	-0.0322573		-0.162456	-0.0119021	-0.0871792
52_Benzene-AcOH_OH-pi_1.25_dimer.out	-460.774	52_Benzene-AcOH_OH-pi_1.25_cpA.out	-228.851	52_Benzene-AcOH_OH-pi_1.25_cpB.out	-231.919	52_Benzene-AcOH_OH-pi_1.00_monomerA.out	-231.918	52_Benzene-AcOH_OH-pi_1.00_monomerB.out	-228.85		3.0369	3.13411	3.08551		3.107	3.121	3.15593		-0.0700964	0.0271124	-0.021492		-0.0840964	0.0131124	-0.035492		-0.119026	-0.0218171	-0.0704215
52_Benzene-AcOH_OH-pi_1.50_dimer.out	-460.772	52_Benzene-AcOH_OH-pi_1.50_cpA.out	-228.851	52_Benzene-AcOH_OH-pi_1.50_cpB.out	-231.918	52_Benzene-AcOH_OH-pi_1.00_monomerA.out	-231.918	52_Benzene-AcOH_OH-pi_1.00_monomerB.out	-228.85		1.63696	1.68729	1.66212		1.697	1.705	1.72199		-0.0600407	-0.0097142	-0.0348775		-0.0680407	-0.0177142	-0.0428775		-0.0850271	-0.0347006	-0.0598639
52_Benzene-AcOH_OH-pi_2.00_dimer.out	-460.77	52_Benzene-AcOH_OH-pi_2.00_cpA.out	-228.851	52_Benzene-AcOH_OH-pi_2.00_cpB.out	-231.918	52_Benzene-AcOH_OH-pi_1.00_monomerA.out	-231.918	52_Benzene-AcOH_OH-pi_1.00_monomerB.out	-228.85		0.53336	0.548938	0.541149		0.554	0.558	0.564062		-0.0206403	-0.00506221	-0.0128512		-0.0246403	-0.00906221	-0.0168512		-0.0307019	-0.0151239	-0.0229129
53_Benzene-AcNH2_NH-pi_0.90_dimer.out	-440.908	53_Benzene-AcNH2_NH-pi_0.90_cpA.out	-208.984	53_Benzene-AcNH2_NH-pi_0.90_cpB.out	-231.919	53_Benzene-AcNH2_NH-pi_1.00_monomerA.out	-231.918	53_Benzene-AcNH2_NH-pi_1.00_monomerB.out	-208.983		3.51915	3.74536	3.63226		3.768	3.763	3.84881		-0.24885	-0.0226381	-0.135744		-0.24385	-0.0176381	-0.130744		-0.329663	-0.103451	-0.216557
53_Benzene-AcNH2_NH-pi_0.95_dimer.out	-440.909	53_Benzene-AcNH2_NH-pi_0.95_cpA.out	-208.984	53_Benzene-AcNH2_NH-pi_0.95_cpB.out	-231.919	53_Benzene-AcNH2_NH-pi_1.00_monomerA.out	-231.918	53_Benzene-AcNH2_NH-pi_1.00_monomerB.out	-208.983		4.04575	4.24298	4.14437		4.242	4.247	4.32013		-0.196246	0.000977229	-0.0976343		-0.201246	-0.00402277	-0.102634		-0.274381	-0.0771577	-0.175769
53_Benzene-AcNH2_NH-pi_1.00_dimer.out	-440.909	53_Benzene-AcNH2_NH-pi_1.00_cpA.out	-208.984	53_Benzene-AcNH2_NH-pi_1.00_cpB.out	-231.919	53_Benzene-AcNH2_NH-pi_1.00_monomerA.out	-231.918	53_Benzene-AcNH2_NH-pi_1.00_monomerB.out	-208.983		4.1765	4.3486	4.26255		4.334	4.346	4.40828		-0.157505	0.014597	-0.0714538		-0.169505	0.00259702	-0.0834538		-0.231782	-0.0596808	-0.145732
53_Benzene-AcNH2_NH-pi_1.05_dimer.out	-440.909	53_Benzene-AcNH2_NH-pi_1.05_cpA.out	-208.983	53_Benzene-AcNH2_NH-pi_1.05_cpB.out	-231.919	53_Benzene-AcNH2_NH-pi_1.00_monomerA.out	-231.918	53_Benzene-AcNH2_NH-pi_1.00_monomerB.out	-208.983		4.07078	4.22109	4.14593		4.201	4.216	4.27029		-0.130222	0.0200915	-0.0550654		-0.145222	0.00509146	-0.0700654		-0.19951	-0.0491963	-0.124353
53_Benzene-AcNH2_NH-pi_1.10_dimer.out	-440.908	53_Benzene-AcNH2_NH-pi_1.10_cpA.out	-208.983	53_Benzene-AcNH2_NH-pi_1.10_cpB.out	-231.919	53_Benzene-AcNH2_NH-pi_1.00_monomerA.out	-231.918	53_Benzene-AcNH2_NH-pi_1.00_monomerB.out	-208.983		3.83231	3.96337	3.89784		3.945	3.961	4.0079		-0.112691	0.0183701	-0.0471604		-0.128691	0.00237009	-0.0631604		-0.175595	-0.0445335	-0.110064
53_Benzene-AcNH2_NH-pi_1.25_dimer.out	-440.907	53_Benzene-AcNH2_NH-pi_1.25_cpA.out	-208.983	53_Benzene-AcNH2_NH-pi_1.25_cpB.out	-231.919	53_Benzene-AcNH2_NH-pi_1.00_monomerA.out	-231.918	53_Benzene-AcNH2_NH-pi_1.00_monomerB.out	-208.983		2.87028	2.95754	2.91391		2.96	2.974	3.00521		-0.0897211	-0.00245973	-0.0460904		-0.103721	-0.0164597	-0.0600904		-0.134936	-0.0476742	-0.0913049
53_Benzene-AcNH2_NH-pi_1.50_dimer.out	-440.904	53_Benzene-AcNH2_NH-pi_1.50_cpA.out	-208.983	53_Benzene-AcNH2_NH-pi_1.50_cpB.out	-231.918	53_Benzene-AcNH2_NH-pi_1.00_monomerA.out	-231.918	53_Benzene-AcNH2_NH-pi_1.00_monomerB.out	-208.983		1.5681	1.61286	1.59048		1.641	1.651	1.6679		-0.0729025	-0.0281421	-0.0505223		-0.0829025	-0.0381421	-0.0605223		-0.0998038	-0.0550434	-0.0774236
53_Benzene-AcNH2_NH-pi_2.00_dimer.out	-440.903	53_Benzene-AcNH2_NH-pi_2.00_cpA.out	-208.983	53_Benzene-AcNH2_NH-pi_2.00_cpB.out	-231.918	53_Benzene-AcNH2_NH-pi_1.00_monomerA.out	-231.918	53_Benzene-AcNH2_NH-pi_1.00_monomerB.out	-208.983		0.455035	0.469874	0.462454		0.481	0.486	0.491778		-0.0259647	-0.0111263	-0.0185455		-0.0309647	-0.0161263	-0.0235455		-0.036743	-0.0219045	-0.0293237
54_Benzene-Water_OH-pi_0.90_dimer.out	-308.287	54_Benzene-Water_OH-pi_0.90_cpA.out	-76.3641	54_Benzene-Water_OH-pi_0.90_cpB.out	-231.919	54_Benzene-Water_OH-pi_1.00_monomerA.out	-231.918	54_Benzene-Water_OH-pi_1.00_monomerB.out	-76.364		2.71227	2.89531	2.80379		2.745	2.71	2.76563		-0.0327275	0.15031	0.0587911		0.00227253	0.18531	0.0937911		-0.0533592	0.129678	0.0381594
54_Benzene-Water_OH-pi_0.95_dimer.out	-308.288	54_Benzene-Water_OH-pi_0.95_cpA.out	-76.3641	54_Benzene-Water_OH-pi_0.95_cpB.out	-231.919	54_Benzene-Water_OH-pi_1.00_monomerA.out	-231.918	54_Benzene-Water_OH-pi_1.00_monomerB.out	-76.364		3.16188	3.31688	3.23938		3.161	3.139	3.18554		0.000879655	0.15588	0.0783799		0.0228797	0.17788	0.10038		-0.0236589	0.131342	0.0538414
54_Benzene-Water_OH-pi_1.00_dimer.out	-308.288	54_Benzene-Water_OH-pi_1.00_cpA.out	-76.3641	54_Benzene-Water_OH-pi_1.00_cpB.out	-231.919	54_Benzene-Water_OH-pi_1.00_monomerA.out	-231.918	54_Benzene-Water_OH-pi_1.00_monomerB.out	-76.364		3.24184	3.37335	3.30759		3.224	3.212	3.25011		0.0178369	0.149352	0.0835943		0.0298369	0.161352	0.0955943		-0.00827474	0.12324	0.0574827
54_Benzene-Water_OH-pi_1.05_dimer.out	-308.288	54_Benzene-Water_OH-pi_1.05_cpA.out	-76.3641	54_Benzene-Water_OH-pi_1.05_cpB.out	-231.919	54_Benzene-Water_OH-pi_1.00_monomerA.out	-231.918	54_Benzene-Water_OH-pi_1.00_monomerB.out	-76.364		3.11865	3.23131	3.17498		3.094	3.089	3.12098		0.0246471	0.137311	0.0809791		0.0296471	0.142311	0.0859791		-0.00233159	0.110332	0.0540004
54_Benzene-Water_OH-pi_1.10_dimer.out	-308.287	54_Benzene-Water_OH-pi_1.10_cpA.out	-76.364	54_Benzene-Water_OH-pi_1.10_cpB.out	-231.919	54_Benzene-Water_OH-pi_1.00_monomerA.out	-231.918	54_Benzene-Water_OH-pi_1.00_monomerB.out	-76.364		2.89359	2.99074	2.94217		2.87	2.869	2.89572		0.023591	0.12074	0.0721654		0.024591	0.12174	0.0731654		-0.00213057	0.0950182	0.0464438
54_Benzene-Water_OH-pi_1.25_dimer.out	-308.286	54_Benzene-Water_OH-pi_1.25_cpA.out	-76.364	54_Benzene-Water_OH-pi_1.25_cpB.out	-231.919	54_Benzene-Water_OH-pi_1.00_monomerA.out	-231.918	54_Benzene-Water_OH-pi_1.00_monomerB.out	-76.364		2.09139	2.15629	2.12384		2.089	2.09	2.10498		0.00239154	0.0672926	0.0348421		0.00139154	0.0662926	0.0338421		-0.0135863	0.0513148	0.0188642
54_Benzene-Water_OH-pi_1.50_dimer.out	-308.284	54_Benzene-Water_OH-pi_1.50_cpA.out	-76.364	54_Benzene-Water_OH-pi_1.50_cpB.out	-231.919	54_Benzene-Water_OH-pi_1.00_monomerA.out	-231.918	54_Benzene-Water_OH-pi_1.00_monomerB.out	-76.364		1.13602	1.17009	1.15306		1.154	1.153	1.16029		-0.0179801	0.0160933	-0.000943405		-0.0169801	0.0170933	5.65953e-05		-0.0242718	0.00980169	-0.00723504
54_Benzene-Water_OH-pi_2.00_dimer.out	-308.283	54_Benzene-Water_OH-pi_2.00_cpA.out	-76.364	54_Benzene-Water_OH-pi_2.00_cpB.out	-231.918	54_Benzene-Water_OH-pi_1.00_monomerA.out	-231.918	54_Benzene-Water_OH-pi_1.00_monomerB.out	-76.364		0.41161	0.419978	0.415794		0.417	0.417	0.419038		-0.0053901	0.002978	-0.00120605		-0.0053901	0.002978	-0.00120605		-0.0074284	0.000939704	-0.00324435
55_Benzene-MeOH_OH-pi_0.90_dimer.out	-347.524	55_Benzene-MeOH_OH-pi_0.90_cpA.out	-115.6	55_Benzene-MeOH_OH-pi_0.90_cpB.out	-231.919	55_Benzene-MeOH_OH-pi_1.00_monomerA.out	-231.918	55_Benzene-MeOH_OH-pi_1.00_monomerB.out	-115.6		3.13418	3.3765	3.25534		3.338	3.316	3.40283		-0.203824	0.0384983	-0.0826629		-0.181824	0.0604983	-0.0606629		-0.268651	-0.026329	-0.14749
55_Benzene-MeOH_OH-pi_0.95_dimer.out	-347.525	55_Benzene-MeOH_OH-pi_0.95_cpA.out	-115.6	55_Benzene-MeOH_OH-pi_0.95_cpB.out	-231.919	55_Benzene-MeOH_OH-pi_1.00_monomerA.out	-231.918	55_Benzene-MeOH_OH-pi_1.00_monomerB.out	-115.6		3.80715	4.01388	3.91052		3.95	3.941	4.01384		-0.142849	0.0638825	-0.0394834		-0.133849	0.0728825	-0.0304834		-0.206686	4.56589e-05	-0.10332
55_Benzene-MeOH_OH-pi_1.00_dimer.out	-347.525	55_Benzene-MeOH_OH-pi_1.00_cpA.out	-115.6	55_Benzene-MeOH_OH-pi_1.00_cpB.out	-231.919	55_Benzene-MeOH_OH-pi_1.00_monomerA.out	-231.918	55_Benzene-MeOH_OH-pi_1.00_monomerB.out	-115.6		4.00533	4.18283	4.09408		4.106	4.106	4.16759		-0.100667	0.076831	-0.0119182		-0.100667	0.076831	-0.0119182		-0.162259	0.0152393	-0.0735099
55_Benzene-MeOH_OH-pi_1.05_dimer.out	-347.525	55_Benzene-MeOH_OH-pi_1.05_cpA.out	-115.6	55_Benzene-MeOH_OH-pi_1.05_cpB.out	-231.919	55_Benzene-MeOH_OH-pi_1.00_monomerA.out	-231.918	55_Benzene-MeOH_OH-pi_1.00_monomerB.out	-115.6		3.92443	4.07592	4.00017		3.998	4.005	4.05688		-0.073571	0.077918	0.00217354		-0.080571	0.070918	-0.00482646		-0.132447	0.0190421	-0.0567024
55_Benzene-MeOH_OH-pi_1.10_dimer.out	-347.525	55_Benzene-MeOH_OH-pi_1.10_cpA.out	-115.6	55_Benzene-MeOH_OH-pi_1.10_cpB.out	-231.919	55_Benzene-MeOH_OH-pi_1.00_monomerA.out	-231.918	55_Benzene-MeOH_OH-pi_1.00_monomerB.out	-115.6		3.69112	3.82209	3.7566		3.749	3.76	3.80401		-0.0578761	0.0730852	0.00760452		-0.0688761	0.0620852	-0.00339548		-0.11289	0.0180711	-0.0474095
55_Benzene-MeOH_OH-pi_1.25_dimer.out	-347.523	55_Benzene-MeOH_OH-pi_1.25_cpA.out	-115.6	55_Benzene-MeOH_OH-pi_1.25_cpB.out	-231.919	55_Benzene-MeOH_OH-pi_1.00_monomerA.out	-231.918	55_Benzene-MeOH_OH-pi_1.00_monomerB.out	-115.6		2.72676	2.81132	2.76904		2.774	2.786	2.81332		-0.047243	0.0373187	-0.00496216		-0.059243	0.0253187	-0.0169622		-0.0865662	-0.0020045	-0.0442854
55_Benzene-MeOH_OH-pi_1.50_dimer.out	-347.521	55_Benzene-MeOH_OH-pi_1.50_cpA.out	-115.6	55_Benzene-MeOH_OH-pi_1.50_cpB.out	-231.919	55_Benzene-MeOH_OH-pi_1.00_monomerA.out	-231.918	55_Benzene-MeOH_OH-pi_1.00_monomerB.out	-115.6		1.47561	1.51931	1.49746		1.524	1.529	1.54163		-0.0483897	-0.00469489	-0.0265423		-0.0533897	-0.00969489	-0.0315423		-0.0660246	-0.0223298	-0.0441772
55_Benzene-MeOH_OH-pi_2.00_dimer.out	-347.52	55_Benzene-MeOH_OH-pi_2.00_cpA.out	-115.6	55_Benzene-MeOH_OH-pi_2.00_cpB.out	-231.918	55_Benzene-MeOH_OH-pi_1.00_monomerA.out	-231.918	55_Benzene-MeOH_OH-pi_1.00_monomerB.out	-115.6		0.503361	0.51571	0.509535		0.518	0.521	0.525743		-0.0146394	-0.00229046	-0.00846492		-0.0176394	-0.00529046	-0.0114649		-0.0223828	-0.0100338	-0.0162083
56_Benzene-MeNH2_NH-pi_0.90_dimer.out	-327.661	56_Benzene-MeNH2_NH-pi_0.90_cpA.out	-95.7391	56_Benzene-MeNH2_NH-pi_0.90_cpB.out	-231.919	56_Benzene-MeNH2_NH-pi_1.00_monomerA.out	-231.918	56_Benzene-MeNH2_NH-pi_1.00_monomerB.out	-95.7389		2.19753	2.41655	2.30704		2.381	2.376	2.45699		-0.183471	0.0355473	-0.073962		-0.178471	0.0405473	-0.068962		-0.25946	-0.0404418	-0.149951
56_Benzene-MeNH2_NH-pi_0.95_dimer.out	-327.662	56_Benzene-MeNH2_NH-pi_0.95_cpA.out	-95.7391	56_Benzene-MeNH2_NH-pi_0.95_cpB.out	-231.919	56_Benzene-MeNH2_NH-pi_1.00_monomerA.out	-231.918	56_Benzene-MeNH2_NH-pi_1.00_monomerB.out	-95.7389		2.84882	3.03475	2.94179		2.977	2.983	3.05074		-0.12818	0.0577535	-0.0352132		-0.13418	0.0517535	-0.0412132		-0.201921	-0.015987	-0.108954
56_Benzene-MeNH2_NH-pi_1.00_dimer.out	-327.663	56_Benzene-MeNH2_NH-pi_1.00_cpA.out	-95.7391	56_Benzene-MeNH2_NH-pi_1.00_cpB.out	-231.919	56_Benzene-MeNH2_NH-pi_1.00_monomerA.out	-231.918	56_Benzene-MeNH2_NH-pi_1.00_monomerB.out	-95.7389		3.04802	3.20645	3.12723		3.139	3.153	3.20933		-0.0909783	0.0674455	-0.0117664		-0.104978	0.0534455	-0.0257664		-0.161308	-0.00288423	-0.0820961
56_Benzene-MeNH2_NH-pi_1.05_dimer.out	-327.662	56_Benzene-MeNH2_NH-pi_1.05_cpA.out	-95.739	56_Benzene-MeNH2_NH-pi_1.05_cpB.out	-231.919	56_Benzene-MeNH2_NH-pi_1.00_monomerA.out	-231.918	56_Benzene-MeNH2_NH-pi_1.00_monomerB.out	-95.7389		2.97664	3.10868	3.04266		3.044	3.062	3.10912		-0.0673577	0.0646807	-0.00133853		-0.0853577	0.0466807	-0.0193385		-0.13248	-0.000441902	-0.0664611
56_Benzene-MeNH2_NH-pi_1.10_dimer.out	-327.662	56_Benzene-MeNH2_NH-pi_1.10_cpA.out	-95.739	56_Benzene-MeNH2_NH-pi_1.10_cpB.out	-231.919	56_Benzene-MeNH2_NH-pi_1.00_monomerA.out	-231.918	56_Benzene-MeNH2_NH-pi_1.00_monomerB.out	-95.7389		2.74811	2.85839	2.80325		2.803	2.823	2.86149		-0.0548934	0.0553908	0.000248686		-0.0748934	0.0353908	-0.0197513		-0.113384	-0.00310015	-0.0582422
56_Benzene-MeNH2_NH-pi_1.25_dimer.out	-327.661	56_Benzene-MeNH2_NH-pi_1.25_cpA.out	-95.739	56_Benzene-MeNH2_NH-pi_1.25_cpB.out	-231.919	56_Benzene-MeNH2_NH-pi_1.00_monomerA.out	-231.918	56_Benzene-MeNH2_NH-pi_1.00_monomerB.out	-95.7389		1.87334	1.9406	1.90697		1.922	1.939	1.96023		-0.0486559	0.0186004	-0.0150278		-0.0656559	0.00160039	-0.0320278		-0.0868847	-0.0196284	-0.0532565
56_Benzene-MeNH2_NH-pi_1.50_dimer.out	-327.659	56_Benzene-MeNH2_NH-pi_1.50_cpA.out	-95.739	56_Benzene-MeNH2_NH-pi_1.50_cpB.out	-231.919	56_Benzene-MeNH2_NH-pi_1.00_monomerA.out	-231.918	56_Benzene-MeNH2_NH-pi_1.00_monomerB.out	-95.7389		0.889581	0.921163	0.905372		0.933	0.941	0.950967		-0.0434193	-0.0118372	-0.0276283		-0.0514193	-0.0198372	-0.0356283		-0.0613866	-0.0298046	-0.0455956
56_Benzene-MeNH2_NH-pi_2.00_dimer.out	-327.658	56_Benzene-MeNH2_NH-pi_2.00_cpA.out	-95.739	56_Benzene-MeNH2_NH-pi_2.00_cpB.out	-231.919	56_Benzene-MeNH2_NH-pi_1.00_monomerA.out	-231.918	56_Benzene-MeNH2_NH-pi_1.00_monomerB.out	-95.7389		0.250966	0.259538	0.255252		0.26	0.264	0.267291		-0.00903371	-0.00046181	-0.00474776		-0.0130337	-0.00446181	-0.00874776		-0.0163249	-0.00775298	-0.0120389
57_Benzene-Peptide_NH-pi_0.90_dimer.out	-480.158	57_Benzene-Peptide_NH-pi_0.90_cpA.out	-248.234	57_Benzene-Peptide_NH-pi_0.90_cpB.out	-231.919	57_Benzene-Peptide_NH-pi_1.00_monomerA.out	-231.918	57_Benzene-Peptide_NH-pi_1.00_monomerB.out	-248.233		3.27893	3.63657	3.45775		3.595	3.62	3.75648		-0.316067	0.0415742	-0.137246		-0.341067	0.0165742	-0.162246		-0.477546	-0.119906	-0.298726
57_Benzene-Peptide_NH-pi_0.95_dimer.out	-480.16	57_Benzene-Peptide_NH-pi_0.95_cpA.out	-248.234	57_Benzene-Peptide_NH-pi_0.95_cpB.out	-231.919	57_Benzene-Peptide_NH-pi_1.00_monomerA.out	-231.918	57_Benzene-Peptide_NH-pi_1.00_monomerB.out	-248.233		4.60743	4.90579	4.75661		4.828	4.866	4.97835		-0.220568	0.0777864	-0.071391		-0.258568	0.0397864	-0.109391		-0.370917	-0.072562	-0.221739
57_Benzene-Peptide_NH-pi_1.00_dimer.out	-480.16	57_Benzene-Peptide_NH-pi_1.00_cpA.out	-248.233	57_Benzene-Peptide_NH-pi_1.00_cpB.out	-231.919	57_Benzene-Peptide_NH-pi_1.00_monomerA.out	-231.918	57_Benzene-Peptide_NH-pi_1.00_monomerB.out	-248.233		5.01756	5.26787	5.14272		5.176	5.22	5.31335		-0.158438	0.0918718	-0.0332832		-0.202438	0.0478718	-0.0772832		-0.295785	-0.0454745	-0.17063
57_Benzene-Peptide_NH-pi_1.05_dimer.out	-480.16	57_Benzene-Peptide_NH-pi_1.05_cpA.out	-248.233	57_Benzene-Peptide_NH-pi_1.05_cpB.out	-231.919	57_Benzene-Peptide_NH-pi_1.00_monomerA.out	-231.918	57_Benzene-Peptide_NH-pi_1.00_monomerB.out	-248.233		4.93848	5.14912	5.0438		5.059	5.105	5.18284		-0.120517	0.0901218	-0.0151974		-0.166517	0.0441218	-0.0611974		-0.244352	-0.0337133	-0.139033
57_Benzene-Peptide_NH-pi_1.10_dimer.out	-480.159	57_Benzene-Peptide_NH-pi_1.10_cpA.out	-248.233	57_Benzene-Peptide_NH-pi_1.10_cpB.out	-231.919	57_Benzene-Peptide_NH-pi_1.00_monomerA.out	-231.918	57_Benzene-Peptide_NH-pi_1.00_monomerB.out	-248.233		4.61613	4.79353	4.70483		4.715	4.759	4.82458		-0.0988745	0.0785274	-0.0101736		-0.142875	0.0345274	-0.0541736		-0.208458	-0.0310559	-0.119757
57_Benzene-Peptide_NH-pi_1.25_dimer.out	-480.157	57_Benzene-Peptide_NH-pi_1.25_cpA.out	-248.233	57_Benzene-Peptide_NH-pi_1.25_cpB.out	-231.919	57_Benzene-Peptide_NH-pi_1.00_monomerA.out	-231.918	57_Benzene-Peptide_NH-pi_1.00_monomerB.out	-248.233		3.30371	3.41318	3.35845		3.384	3.419	3.45789		-0.0802873	0.0291835	-0.0255519		-0.115287	-0.00581649	-0.0605519		-0.154178	-0.0447072	-0.0994426
57_Benzene-Peptide_NH-pi_1.50_dimer.out	-480.155	57_Benzene-Peptide_NH-pi_1.50_cpA.out	-248.233	57_Benzene-Peptide_NH-pi_1.50_cpB.out	-231.919	57_Benzene-Peptide_NH-pi_1.00_monomerA.out	-231.918	57_Benzene-Peptide_NH-pi_1.00_monomerB.out	-248.233		1.73059	1.78512	1.75785		1.799	1.818	1.83675		-0.0684148	-0.0138801	-0.0411474		-0.0874148	-0.0328801	-0.0601474		-0.106161	-0.0516264	-0.0788938
57_Benzene-Peptide_NH-pi_2.00_dimer.out	-480.153	57_Benzene-Peptide_NH-pi_2.00_cpA.out	-248.233	57_Benzene-Peptide_NH-pi_2.00_cpB.out	-231.918	57_Benzene-Peptide_NH-pi_1.00_monomerA.out	-231.918	57_Benzene-Peptide_NH-pi_1.00_monomerB.out	-248.233		0.600789	0.616	0.608394		0.619	0.626	0.632287		-0.0182112	-0.00299984	-0.0106055		-0.0252112	-0.00999984	-0.0176055		-0.0314984	-0.0162871	-0.0238928
58_Pyridine-Pyridine_CH-N_0.90_dimer.out	-495.902	58_Pyridine-Pyridine_CH-N_0.90_cpA.out	-247.949	58_Pyridine-Pyridine_CH-N_0.90_cpB.out	-247.949	58_Pyridine-Pyridine_CH-N_1.00_monomerA.out	-247.949	58_Pyridine-Pyridine_CH-N_1.00_monomerB.out	-247.949		2.534	2.76781	2.65091		2.884	2.89	2.98855		-0.349995	-0.116192	-0.233093		-0.355995	-0.122192	-0.239093		-0.454544	-0.22074	-0.337642
58_Pyridine-Pyridine_CH-N_0.95_dimer.out	-495.903	58_Pyridine-Pyridine_CH-N_0.95_cpA.out	-247.949	58_Pyridine-Pyridine_CH-N_0.95_cpB.out	-247.949	58_Pyridine-Pyridine_CH-N_1.00_monomerA.out	-247.949	58_Pyridine-Pyridine_CH-N_1.00_monomerB.out	-247.949		3.58254	3.77761	3.68008		3.869	3.887	3.9696		-0.286456	-0.0913923	-0.188924		-0.304456	-0.109392	-0.206924		-0.387054	-0.19199	-0.289522
58_Pyridine-Pyridine_CH-N_1.00_dimer.out	-495.904	58_Pyridine-Pyridine_CH-N_1.00_cpA.out	-247.949	58_Pyridine-Pyridine_CH-N_1.00_cpB.out	-247.949	58_Pyridine-Pyridine_CH-N_1.00_monomerA.out	-247.949	58_Pyridine-Pyridine_CH-N_1.00_monomerB.out	-247.949		3.95019	4.10379	4.02699		4.166	4.194	4.25883		-0.215807	-0.0622057	-0.139006		-0.243807	-0.0902057	-0.167006		-0.308637	-0.155036	-0.231837
58_Pyridine-Pyridine_CH-N_1.05_dimer.out	-495.904	58_Pyridine-Pyridine_CH-N_1.05_cpA.out	-247.949	58_Pyridine-Pyridine_CH-N_1.05_cpB.out	-247.949	58_Pyridine-Pyridine_CH-N_1.00_monomerA.out	-247.949	58_Pyridine-Pyridine_CH-N_1.00_monomerB.out	-247.949		3.71971	3.84552	3.78262		3.89	3.921	3.97335		-0.170286	-0.0444755	-0.107381		-0.201286	-0.0754755	-0.138381		-0.253637	-0.127826	-0.190732
58_Pyridine-Pyridine_CH-N_1.10_dimer.out	-495.903	58_Pyridine-Pyridine_CH-N_1.10_cpA.out	-247.949	58_Pyridine-Pyridine_CH-N_1.10_cpB.out	-247.949	58_Pyridine-Pyridine_CH-N_1.00_monomerA.out	-247.949	58_Pyridine-Pyridine_CH-N_1.00_monomerB.out	-247.949		3.30071	3.40499	3.35285		3.442	3.474	3.51736		-0.14129	-0.0370136	-0.0891518		-0.17329	-0.0690136	-0.121152		-0.216648	-0.112371	-0.16451
58_Pyridine-Pyridine_CH-N_1.25_dimer.out	-495.901	58_Pyridine-Pyridine_CH-N_1.25_cpA.out	-247.949	58_Pyridine-Pyridine_CH-N_1.25_cpB.out	-247.949	58_Pyridine-Pyridine_CH-N_1.00_monomerA.out	-247.949	58_Pyridine-Pyridine_CH-N_1.00_monomerB.out	-247.949		2.06847	2.13242	2.10044		2.173	2.199	2.22589		-0.104529	-0.0405837	-0.0725561		-0.130529	-0.0665837	-0.0985561		-0.157422	-0.0934774	-0.12545
58_Pyridine-Pyridine_CH-N_1.50_dimer.out	-495.899	58_Pyridine-Pyridine_CH-N_1.50_cpA.out	-247.949	58_Pyridine-Pyridine_CH-N_1.50_cpB.out	-247.949	58_Pyridine-Pyridine_CH-N_1.00_monomerA.out	-247.949	58_Pyridine-Pyridine_CH-N_1.00_monomerB.out	-247.949		0.935658	0.969903	0.95278		1.005	1.025	1.04091		-0.0693416	-0.0350975	-0.0522195		-0.0893416	-0.0550975	-0.0722195		-0.105248	-0.0710042	-0.0881262
58_Pyridine-Pyridine_CH-N_2.00_dimer.out	-495.898	58_Pyridine-Pyridine_CH-N_2.00_cpA.out	-247.949	58_Pyridine-Pyridine_CH-N_2.00_cpB.out	-247.949	58_Pyridine-Pyridine_CH-N_1.00_monomerA.out	-247.949	58_Pyridine-Pyridine_CH-N_1.00_monomerB.out	-247.949		0.252881	0.262871	0.257876		0.274	0.281	0.287246		-0.0211189	-0.0111288	-0.0161239		-0.0281189	-0.0181288	-0.0231239		-0.0343649	-0.0243748	-0.0293698
59_Ethyne-Water_CH-O_0.90_dimer.out	-153.591	59_Ethyne-Water_CH-O_0.90_cpA.out	-76.3641	59_Ethyne-Water_CH-O_0.90_cpB.out	-77.2224	59_Ethyne-Water_CH-O_1.00_monomerA.out	-77.2223	59_Ethyne-Water_CH-O_1.00_monomerB.out	-76.364		2.5427	2.64274	2.59272		2.604	2.573	2.60809		-0.0612963	0.0387393	-0.0112785		-0.0302963	0.0697393	0.0197215		-0.0653863	0.0346493	-0.0153685
59_Ethyne-Water_CH-O_0.95_dimer.out	-153.591	59_Ethyne-Water_CH-O_0.95_cpA.out	-76.3641	59_Ethyne-Water_CH-O_0.95_cpB.out	-77.2224	59_Ethyne-Water_CH-O_1.00_monomerA.out	-77.2223	59_Ethyne-Water_CH-O_1.00_monomerB.out	-76.364		2.81511	2.9011	2.85811		2.865	2.844	2.87259		-0.0498878	0.0361004	-0.00689371		-0.0288878	0.0571004	0.0141063		-0.057474	0.0285141	-0.01448
59_Ethyne-Water_CH-O_1.00_dimer.out	-153.591	59_Ethyne-Water_CH-O_1.00_cpA.out	-76.3641	59_Ethyne-Water_CH-O_1.00_cpB.out	-77.2224	59_Ethyne-Water_CH-O_1.00_monomerA.out	-77.2223	59_Ethyne-Water_CH-O_1.00_monomerB.out	-76.364		2.85741	2.9316	2.8945		2.899	2.883	2.90708		-0.0415922	0.0325988	-0.00449668		-0.0255922	0.0485988	0.0115033		-0.0496756	0.0245155	-0.01258
59_Ethyne-Water_CH-O_1.05_dimer.out	-153.591	59_Ethyne-Water_CH-O_1.05_cpA.out	-76.3641	59_Ethyne-Water_CH-O_1.05_cpB.out	-77.2223	59_Ethyne-Water_CH-O_1.00_monomerA.out	-77.2223	59_Ethyne-Water_CH-O_1.00_monomerB.out	-76.364		2.76396	2.82856	2.79626		2.799	2.788	2.80691		-0.0350413	0.0295598	-0.00274076		-0.0240413	0.0405598	0.00825924		-0.0429525	0.0216486	-0.0106519
59_Ethyne-Water_CH-O_1.10_dimer.out	-153.591	59_Ethyne-Water_CH-O_1.10_cpA.out	-76.3641	59_Ethyne-Water_CH-O_1.10_cpB.out	-77.2223	59_Ethyne-Water_CH-O_1.00_monomerA.out	-77.2223	59_Ethyne-Water_CH-O_1.00_monomerB.out	-76.364		2.59652	2.65342	2.62497		2.628	2.618	2.6342		-0.0314775	0.025425	-0.00302628		-0.0214775	0.035425	0.00697372		-0.037675	0.0192276	-0.0092237
59_Ethyne-Water_CH-O_1.25_dimer.out	-153.59	59_Ethyne-Water_CH-O_1.25_cpA.out	-76.3641	59_Ethyne-Water_CH-O_1.25_cpB.out	-77.2223	59_Ethyne-Water_CH-O_1.00_monomerA.out	-77.2223	59_Ethyne-Water_CH-O_1.00_monomerB.out	-76.364		1.97179	2.01259	1.99219		1.999	1.994	2.00295		-0.027212	0.013593	-0.0068095		-0.022212	0.018593	-0.0018095		-0.031161	0.00964404	-0.0107585
59_Ethyne-Water_CH-O_1.50_dimer.out	-153.588	59_Ethyne-Water_CH-O_1.50_cpA.out	-76.3641	59_Ethyne-Water_CH-O_1.50_cpB.out	-77.2223	59_Ethyne-Water_CH-O_1.00_monomerA.out	-77.2223	59_Ethyne-Water_CH-O_1.00_monomerB.out	-76.364		1.15318	1.17829	1.16573		1.178	1.177	1.18234		-0.024823	0.000286867	-0.012268		-0.023823	0.00128687	-0.011268		-0.0291597	-0.00404986	-0.0166048
59_Ethyne-Water_CH-O_2.00_dimer.out	-153.587	59_Ethyne-Water_CH-O_2.00_cpA.out	-76.364	59_Ethyne-Water_CH-O_2.00_cpB.out	-77.2223	59_Ethyne-Water_CH-O_1.00_monomerA.out	-77.2223	59_Ethyne-Water_CH-O_1.00_monomerB.out	-76.364		0.453595	0.464763	0.459179		0.461	0.46	0.461369		-0.00740491	0.00376255	-0.00182118		-0.00640491	0.00476255	-0.000821182		-0.00777412	0.00339334	-0.00219039
60_Ethyne-AcOH_OH-pi_0.90_dimer.out	-306.08	60_Ethyne-AcOH_OH-pi_0.90_cpA.out	-228.851	60_Ethyne-AcOH_OH-pi_0.90_cpB.out	-77.2224	60_Ethyne-AcOH_OH-pi_1.00_monomerA.out	-77.2223	60_Ethyne-AcOH_OH-pi_1.00_monomerB.out	-228.85		4.26571	4.423	4.34436		4.306	4.295	4.36371		-0.0402877	0.117005	0.0383585		-0.0292877	0.128005	0.0493585		-0.0979968	0.0592956	-0.0193506
60_Ethyne-AcOH_OH-pi_0.95_dimer.out	-306.081	60_Ethyne-AcOH_OH-pi_0.95_cpA.out	-228.851	60_Ethyne-AcOH_OH-pi_0.95_cpB.out	-77.2224	60_Ethyne-AcOH_OH-pi_1.00_monomerA.out	-77.2223	60_Ethyne-AcOH_OH-pi_1.00_monomerB.out	-228.85		4.7773	4.9076	4.84245		4.787	4.788	4.84398		-0.00970471	0.120601	0.0554481		-0.0107047	0.119601	0.0544481		-0.0666827	0.0636229	-0.00152989
60_Ethyne-AcOH_OH-pi_1.00_dimer.out	-306.081	60_Ethyne-AcOH_OH-pi_1.00_cpA.out	-228.851	60_Ethyne-AcOH_OH-pi_1.00_cpB.out	-77.2224	60_Ethyne-AcOH_OH-pi_1.00_monomerA.out	-77.2223	60_Ethyne-AcOH_OH-pi_1.00_monomerB.out	-228.85		4.86586	4.97508	4.92047		4.854	4.863	4.90792		0.0118639	0.121083	0.0664733		0.0028639	0.112083	0.0574733		-0.0420608	0.067158	0.0125486
60_Ethyne-AcOH_OH-pi_1.05_dimer.out	-306.08	60_Ethyne-AcOH_OH-pi_1.05_cpA.out	-228.851	60_Ethyne-AcOH_OH-pi_1.05_cpB.out	-77.2223	60_Ethyne-AcOH_OH-pi_1.00_monomerA.out	-77.2223	60_Ethyne-AcOH_OH-pi_1.00_monomerB.out	-228.85		4.7024	4.79497	4.74869		4.679	4.692	4.72711		0.0234048	0.115974	0.0696895		0.0104048	0.102974	0.0566895		-0.0247059	0.0678636	0.0215788
60_Ethyne-AcOH_OH-pi_1.10_dimer.out	-306.08	60_Ethyne-AcOH_OH-pi_1.10_cpA.out	-228.851	60_Ethyne-AcOH_OH-pi_1.10_cpB.out	-77.2223	60_Ethyne-AcOH_OH-pi_1.00_monomerA.out	-77.2223	60_Ethyne-AcOH_OH-pi_1.00_monomerB.out	-228.85		4.39961	4.4789	4.43926		4.371	4.385	4.41354		0.0286094	0.107901	0.0682553		0.0146094	0.0939012	0.0542553		-0.0139295	0.0653623	0.0257164
60_Ethyne-AcOH_OH-pi_1.25_dimer.out	-306.078	60_Ethyne-AcOH_OH-pi_1.25_cpA.out	-228.851	60_Ethyne-AcOH_OH-pi_1.25_cpB.out	-77.2223	60_Ethyne-AcOH_OH-pi_1.00_monomerA.out	-77.2223	60_Ethyne-AcOH_OH-pi_1.00_monomerB.out	-228.85		3.25127	3.30292	3.27709		3.234	3.248	3.26262		0.0172686	0.0689163	0.0430924		0.00326862	0.0549163	0.0290924		-0.0113544	0.0402932	0.0144694
60_Ethyne-AcOH_OH-pi_1.50_dimer.out	-306.076	60_Ethyne-AcOH_OH-pi_1.50_cpA.out	-228.85	60_Ethyne-AcOH_OH-pi_1.50_cpB.out	-77.2223	60_Ethyne-AcOH_OH-pi_1.00_monomerA.out	-77.2223	60_Ethyne-AcOH_OH-pi_1.00_monomerB.out	-228.85		1.74479	1.77176	1.75828		1.76	1.769	1.77638		-0.0152117	0.0117619	-0.00172489		-0.0242117	0.00276188	-0.0107249		-0.0315894	-0.00461586	-0.0181026
60_Ethyne-AcOH_OH-pi_2.00_dimer.out	-306.074	60_Ethyne-AcOH_OH-pi_2.00_cpA.out	-228.85	60_Ethyne-AcOH_OH-pi_2.00_cpB.out	-77.2223	60_Ethyne-AcOH_OH-pi_1.00_monomerA.out	-77.2223	60_Ethyne-AcOH_OH-pi_1.00_monomerB.out	-228.85		0.541343	0.55009	0.545717		0.556	0.557	0.559371		-0.0146567	-0.00591009	-0.0102834		-0.0156567	-0.00691009	-0.0112834		-0.0180281	-0.00928142	-0.0136548
61_Pentane-AcOH_0.90_dimer.out	-426.339	61_Pentane-AcOH_0.90_cpA.out	-228.851	61_Pentane-AcOH_0.90_cpB.out	-197.484	61_Pentane-AcOH_1.00_monomerA.out	-197.484	61_Pentane-AcOH_1.00_monomerB.out	-228.851		2.14962	2.39758	2.2736		2.629	2.642	2.74138		-0.479376	-0.231418	-0.355397		-0.492376	-0.244418	-0.368397		-0.591755	-0.343798	-0.467777
61_Pentane-AcOH_0.95_dimer.out	-426.339	61_Pentane-AcOH_0.95_cpA.out	-228.851	61_Pentane-AcOH_0.95_cpB.out	-197.484	61_Pentane-AcOH_1.00_monomerA.out	-197.484	61_Pentane-AcOH_1.00_monomerB.out	-228.851		2.44002	2.65598	2.548		2.835	2.852	2.93781		-0.394981	-0.179021	-0.287001		-0.411981	-0.196021	-0.304001		-0.497791	-0.281831	-0.389811
61_Pentane-AcOH_1.00_dimer.out	-426.339	61_Pentane-AcOH_1.00_cpA.out	-228.851	61_Pentane-AcOH_1.00_cpB.out	-197.484	61_Pentane-AcOH_1.00_monomerA.out	-197.484	61_Pentane-AcOH_1.00_monomerB.out	-228.851		2.48936	2.67896	2.58416		2.82	2.839	2.91301		-0.330636	-0.141043	-0.23584		-0.349636	-0.160043	-0.25484		-0.423651	-0.234057	-0.328854
61_Pentane-AcOH_1.05_dimer.out	-426.339	61_Pentane-AcOH_1.05_cpA.out	-228.851	61_Pentane-AcOH_1.05_cpB.out	-197.484	61_Pentane-AcOH_1.00_monomerA.out	-197.484	61_Pentane-AcOH_1.00_monomerB.out	-228.851		2.39513	2.56307	2.4791		2.677	2.697	2.76125		-0.281869	-0.11393	-0.1979		-0.301869	-0.13393	-0.2179		-0.366115	-0.198176	-0.282145
61_Pentane-AcOH_1.10_dimer.out	-426.339	61_Pentane-AcOH_1.10_cpA.out	-228.851	61_Pentane-AcOH_1.10_cpB.out	-197.484	61_Pentane-AcOH_1.00_monomerA.out	-197.484	61_Pentane-AcOH_1.00_monomerB.out	-228.851		2.22258	2.37053	2.29656		2.467	2.488	2.5436		-0.244417	-0.0964669	-0.170442		-0.265417	-0.117467	-0.191442		-0.32102	-0.17307	-0.247045
61_Pentane-AcOH_1.25_dimer.out	-426.337	61_Pentane-AcOH_1.25_cpA.out	-228.851	61_Pentane-AcOH_1.25_cpB.out	-197.484	61_Pentane-AcOH_1.00_monomerA.out	-197.484	61_Pentane-AcOH_1.00_monomerB.out	-228.851		1.57801	1.67773	1.62787		1.757	1.775	1.81196		-0.178989	-0.0792745	-0.129132		-0.196989	-0.0972745	-0.147132		-0.233947	-0.134233	-0.18409
61_Pentane-AcOH_1.50_dimer.out	-426.336	61_Pentane-AcOH_1.50_cpA.out	-228.851	61_Pentane-AcOH_1.50_cpB.out	-197.484	61_Pentane-AcOH_1.00_monomerA.out	-197.484	61_Pentane-AcOH_1.00_monomerB.out	-228.851		0.6628	0.710872	0.686836		0.773	0.784	0.802397		-0.1102	-0.0621277	-0.0861641		-0.1212	-0.0731277	-0.0971641		-0.139597	-0.0915247	-0.115561
61_Pentane-AcOH_2.00_dimer.out	-426.335	61_Pentane-AcOH_2.00_cpA.out	-228.851	61_Pentane-AcOH_2.00_cpB.out	-197.484	61_Pentane-AcOH_1.00_monomerA.out	-197.484	61_Pentane-AcOH_1.00_monomerB.out	-228.851		0.141112	0.152968	0.14704		0.166	0.171	0.177279		-0.0248881	-0.0130325	-0.0189603		-0.0298881	-0.0180325	-0.0239603		-0.0361676	-0.0243119	-0.0302398
62_Pentane-AcNH2_0.90_dimer.out	-406.472	62_Pentane-AcNH2_0.90_cpA.out	-208.984	62_Pentane-AcNH2_0.90_cpB.out	-197.484	62_Pentane-AcNH2_1.00_monomerA.out	-197.484	62_Pentane-AcNH2_1.00_monomerB.out	-208.983		2.47746	2.74314	2.6103		3.074	3.079	3.19348		-0.596536	-0.330856	-0.463696		-0.601536	-0.335856	-0.468696		-0.716011	-0.450331	-0.583171
62_Pentane-AcNH2_0.95_dimer.out	-406.473	62_Pentane-AcNH2_0.95_cpA.out	-208.984	62_Pentane-AcNH2_0.95_cpB.out	-197.484	62_Pentane-AcNH2_1.00_monomerA.out	-197.484	62_Pentane-AcNH2_1.00_monomerB.out	-208.983		2.94879	3.17726	3.06303		3.426	3.442	3.53833		-0.477209	-0.248739	-0.362974		-0.493209	-0.264739	-0.378974		-0.58954	-0.361069	-0.475304
62_Pentane-AcNH2_1.00_dimer.out	-406.473	62_Pentane-AcNH2_1.00_cpA.out	-208.984	62_Pentane-AcNH2_1.00_cpB.out	-197.484	62_Pentane-AcNH2_1.00_monomerA.out	-197.484	62_Pentane-AcNH2_1.00_monomerB.out	-208.983		3.04768	3.24381	3.14575		3.437	3.458	3.53992		-0.389318	-0.193185	-0.291252		-0.410318	-0.214185	-0.312252		-0.492238	-0.296105	-0.394172
62_Pentane-AcNH2_1.05_dimer.out	-406.473	62_Pentane-AcNH2_1.05_cpA.out	-208.984	62_Pentane-AcNH2_1.05_cpB.out	-197.484	62_Pentane-AcNH2_1.00_monomerA.out	-197.484	62_Pentane-AcNH2_1.00_monomerB.out	-208.983		2.93441	3.10371	3.01906		3.259	3.283	3.35251		-0.324593	-0.155294	-0.239943		-0.348593	-0.179294	-0.263943		-0.4181	-0.248801	-0.33345
62_Pentane-AcNH2_1.10_dimer.out	-406.472	62_Pentane-AcNH2_1.10_cpA.out	-208.984	62_Pentane-AcNH2_1.10_cpB.out	-197.484	62_Pentane-AcNH2_1.00_monomerA.out	-197.484	62_Pentane-AcNH2_1.00_monomerB.out	-208.983		2.71032	2.85749	2.78391		2.988	3.013	3.07219		-0.27768	-0.130506	-0.204093		-0.30268	-0.155506	-0.229093		-0.361873	-0.214699	-0.288286
62_Pentane-AcNH2_1.25_dimer.out	-406.471	62_Pentane-AcNH2_1.25_cpA.out	-208.984	62_Pentane-AcNH2_1.25_cpB.out	-197.484	62_Pentane-AcNH2_1.00_monomerA.out	-197.484	62_Pentane-AcNH2_1.00_monomerB.out	-208.983		1.88224	1.97791	1.93008		2.078	2.102	2.14015		-0.195756	-0.100089	-0.147923		-0.219756	-0.124089	-0.171923		-0.257906	-0.162238	-0.210072
62_Pentane-AcNH2_1.50_dimer.out	-406.469	62_Pentane-AcNH2_1.50_cpA.out	-208.983	62_Pentane-AcNH2_1.50_cpB.out	-197.484	62_Pentane-AcNH2_1.00_monomerA.out	-197.484	62_Pentane-AcNH2_1.00_monomerB.out	-208.983		0.895806	0.945931	0.920869		1.025	1.041	1.06071		-0.129194	-0.0790685	-0.104131		-0.145194	-0.0950685	-0.120131		-0.164905	-0.11478	-0.139843
62_Pentane-AcNH2_2.00_dimer.out	-406.468	62_Pentane-AcNH2_2.00_cpA.out	-208.983	62_Pentane-AcNH2_2.00_cpB.out	-197.484	62_Pentane-AcNH2_1.00_monomerA.out	-197.484	62_Pentane-AcNH2_1.00_monomerB.out	-208.983		0.232903	0.24842	0.240661		0.268	0.276	0.283102		-0.0350971	-0.0195805	-0.0273388		-0.0430971	-0.0275805	-0.0353388		-0.0501992	-0.0346826	-0.0424409
63_Benzene-AcOH_0.90_dimer.out	-460.773	63_Benzene-AcOH_0.90_cpA.out	-228.851	63_Benzene-AcOH_0.90_cpB.out	-231.919	63_Benzene-AcOH_1.00_monomerA.out	-231.918	63_Benzene-AcOH_1.00_monomerB.out	-228.851		2.24516	2.58504	2.4151		2.547	2.574	2.69145		-0.301839	0.0380384	-0.1319		-0.328839	0.0110384	-0.1589		-0.446293	-0.106416	-0.276354
63_Benzene-AcOH_0.95_dimer.out	-460.775	63_Benzene-AcOH_0.95_cpA.out	-228.851	63_Benzene-AcOH_0.95_cpB.out	-231.919	63_Benzene-AcOH_1.00_monomerA.out	-231.918	63_Benzene-AcOH_1.00_monomerB.out	-228.851		3.2223	3.50901	3.36566		3.444	3.483	3.58124		-0.221702	0.0650118	-0.078345		-0.260702	0.0260118	-0.117345		-0.358938	-0.0722248	-0.215582
63_Benzene-AcOH_1.00_dimer.out	-460.775	63_Benzene-AcOH_1.00_cpA.out	-228.851	63_Benzene-AcOH_1.00_cpB.out	-231.919	63_Benzene-AcOH_1.00_monomerA.out	-231.918	63_Benzene-AcOH_1.00_monomerB.out	-228.851		3.50133	3.74284	3.62209		3.671	3.715	3.79787		-0.169666	0.0718425	-0.0489118		-0.213666	0.0278425	-0.0929118		-0.296537	-0.0550279	-0.175782
63_Benzene-AcOH_1.05_dimer.out	-460.775	63_Benzene-AcOH_1.05_cpA.out	-228.851	63_Benzene-AcOH_1.05_cpB.out	-231.919	63_Benzene-AcOH_1.00_monomerA.out	-231.918	63_Benzene-AcOH_1.00_monomerB.out	-228.851		3.4097	3.61256	3.51113		3.546	3.591	3.6603		-0.136301	0.0665581	-0.0348714		-0.181301	0.0215581	-0.0798714		-0.250602	-0.0477432	-0.149173
63_Benzene-AcOH_1.10_dimer.out	-460.774	63_Benzene-AcOH_1.10_cpA.out	-228.851	63_Benzene-AcOH_1.10_cpB.out	-231.919	63_Benzene-AcOH_1.00_monomerA.out	-231.918	63_Benzene-AcOH_1.00_monomerB.out	-228.851		3.13721	3.30996	3.22358		3.253	3.296	3.35425		-0.115791	0.0569567	-0.0294171		-0.158791	0.0139567	-0.0724171		-0.217042	-0.0442939	-0.130668
63_Benzene-AcOH_1.25_dimer.out	-460.773	63_Benzene-AcOH_1.25_cpA.out	-228.851	63_Benzene-AcOH_1.25_cpB.out	-231.919	63_Benzene-AcOH_1.00_monomerA.out	-231.918	63_Benzene-AcOH_1.00_monomerB.out	-228.851		2.10235	2.20937	2.15586		2.195	2.226	2.26003		-0.092654	0.0143739	-0.0391401		-0.123654	-0.0166261	-0.0701401		-0.157687	-0.0506592	-0.104173
63_Benzene-AcOH_1.50_dimer.out	-460.771	63_Benzene-AcOH_1.50_cpA.out	-228.851	63_Benzene-AcOH_1.50_cpB.out	-231.919	63_Benzene-AcOH_1.00_monomerA.out	-231.918	63_Benzene-AcOH_1.00_monomerB.out	-228.851		0.941591	0.989875	0.965733		1.007	1.024	1.04046		-0.0654086	-0.0171251	-0.0412668		-0.0824086	-0.0341251	-0.0582668		-0.0988717	-0.0505881	-0.0747299
63_Benzene-AcOH_2.00_dimer.out	-460.769	63_Benzene-AcOH_2.00_cpA.out	-228.851	63_Benzene-AcOH_2.00_cpB.out	-231.918	63_Benzene-AcOH_1.00_monomerA.out	-231.918	63_Benzene-AcOH_1.00_monomerB.out	-228.851		0.245431	0.258658	0.252044		0.259	0.265	0.27148		-0.0135694	-0.000341812	-0.0069556		-0.0195694	-0.00634181	-0.0129556		-0.0260497	-0.0128221	-0.0194359
64_Peptide-Ethene_0.90_dimer.out	-326.711	64_Peptide-Ethene_0.90_cpA.out	-78.4738	64_Peptide-Ethene_0.90_cpB.out	-248.234	64_Peptide-Ethene_1.00_monomerA.out	-248.233	64_Peptide-Ethene_1.00_monomerB.out	-78.4737		2.22911	2.41183	2.32047		2.527	2.528	2.59879		-0.297888	-0.115169	-0.206529		-0.298888	-0.116169	-0.207529		-0.369677	-0.186958	-0.278318
64_Peptide-Ethene_0.95_dimer.out	-326.711	64_Peptide-Ethene_0.95_cpA.out	-78.4738	64_Peptide-Ethene_0.95_cpB.out	-248.233	64_Peptide-Ethene_1.00_monomerA.out	-248.233	64_Peptide-Ethene_1.00_monomerB.out	-78.4737		2.64907	2.80321	2.72614		2.881	2.893	2.95201		-0.231931	-0.07779	-0.154861		-0.243931	-0.08979	-0.166861		-0.30294	-0.148799	-0.22587
64_Peptide-Ethene_1.00_dimer.out	-326.712	64_Peptide-Ethene_1.00_cpA.out	-78.4738	64_Peptide-Ethene_1.00_cpB.out	-248.233	64_Peptide-Ethene_1.00_monomerA.out	-248.233	64_Peptide-Ethene_1.00_monomerB.out	-78.4737		2.74344	2.87445	2.80895		2.928	2.945	2.99435		-0.184562	-0.0535468	-0.119054		-0.201562	-0.0705468	-0.136054		-0.250908	-0.119893	-0.185401
64_Peptide-Ethene_1.05_dimer.out	-326.711	64_Peptide-Ethene_1.05_cpA.out	-78.4737	64_Peptide-Ethene_1.05_cpB.out	-248.233	64_Peptide-Ethene_1.00_monomerA.out	-248.233	64_Peptide-Ethene_1.00_monomerB.out	-78.4737		2.64973	2.76215	2.70594		2.801	2.82	2.86193		-0.151272	-0.0388461	-0.0950591		-0.170272	-0.0578461	-0.114059		-0.212198	-0.0997715	-0.155985
64_Peptide-Ethene_1.10_dimer.out	-326.711	64_Peptide-Ethene_1.10_cpA.out	-78.4737	64_Peptide-Ethene_1.10_cpB.out	-248.233	64_Peptide-Ethene_1.00_monomerA.out	-248.233	64_Peptide-Ethene_1.00_monomerB.out	-78.4737		2.45742	2.55436	2.50589		2.585	2.605	2.64066		-0.127578	-0.0306366	-0.0791075		-0.147578	-0.0506366	-0.0991075		-0.183237	-0.0862952	-0.134766
64_Peptide-Ethene_1.25_dimer.out	-326.71	64_Peptide-Ethene_1.25_cpA.out	-78.4737	64_Peptide-Ethene_1.25_cpB.out	-248.233	64_Peptide-Ethene_1.00_monomerA.out	-248.233	64_Peptide-Ethene_1.00_monomerB.out	-78.4737		1.73308	1.79559	1.76434		1.828	1.846	1.8687		-0.0949168	-0.0324118	-0.0636643		-0.112917	-0.0504118	-0.0816643		-0.135615	-0.0731096	-0.104362
64_Peptide-Ethene_1.50_dimer.out	-326.708	64_Peptide-Ethene_1.50_cpA.out	-78.4737	64_Peptide-Ethene_1.50_cpB.out	-248.233	64_Peptide-Ethene_1.00_monomerA.out	-248.233	64_Peptide-Ethene_1.00_monomerB.out	-78.4737		0.799331	0.830166	0.814749		0.867	0.878	0.8899		-0.0676688	-0.0368339	-0.0522513		-0.0786688	-0.0478339	-0.0632513		-0.0905692	-0.0597343	-0.0751517
64_Peptide-Ethene_2.00_dimer.out	-326.707	64_Peptide-Ethene_2.00_cpA.out	-78.4737	64_Peptide-Ethene_2.00_cpB.out	-248.233	64_Peptide-Ethene_1.00_monomerA.out	-248.233	64_Peptide-Ethene_1.00_monomerB.out	-78.4737		0.17537	0.182867	0.179118		0.188	0.191	0.193792		-0.0126303	-0.00513328	-0.0088818		-0.0156303	-0.00813328	-0.0118818		-0.0184228	-0.0109257	-0.0146742
65_Pyridine-Ethyne_0.90_dimer.out	-325.177	65_Pyridine-Ethyne_0.90_cpA.out	-77.2224	65_Pyridine-Ethyne_0.90_cpB.out	-247.949	65_Pyridine-Ethyne_1.00_monomerA.out	-247.949	65_Pyridine-Ethyne_1.00_monomerB.out	-77.2223		3.71168	3.852	3.78184		3.661	3.647	3.70059		0.0506835	0.191	0.120842		0.0646835	0.205	0.134842		0.0110891	0.151405	0.0812472
65_Pyridine-Ethyne_0.95_dimer.out	-325.178	65_Pyridine-Ethyne_0.95_cpA.out	-77.2223	65_Pyridine-Ethyne_0.95_cpB.out	-247.949	65_Pyridine-Ethyne_1.00_monomerA.out	-247.949	65_Pyridine-Ethyne_1.00_monomerB.out	-77.2223		4.04867	4.16834	4.1085		4.008	4.002	4.04799		0.0406697	0.160337	0.100503		0.0466697	0.166337	0.106503		0.000681443	0.120349	0.060515
65_Pyridine-Ethyne_1.00_dimer.out	-325.178	65_Pyridine-Ethyne_1.00_cpA.out	-77.2223	65_Pyridine-Ethyne_1.00_cpB.out	-247.949	65_Pyridine-Ethyne_1.00_monomerA.out	-247.949	65_Pyridine-Ethyne_1.00_monomerB.out	-77.2223		4.09796	4.20054	4.14925		4.066	4.065	4.10364		0.0319578	0.134538	0.0832477		0.0329578	0.135538	0.0842477		-0.00567753	0.0969022	0.0456123
65_Pyridine-Ethyne_1.05_dimer.out	-325.177	65_Pyridine-Ethyne_1.05_cpA.out	-77.2223	65_Pyridine-Ethyne_1.05_cpB.out	-247.949	65_Pyridine-Ethyne_1.00_monomerA.out	-247.949	65_Pyridine-Ethyne_1.00_monomerB.out	-77.2223		3.97059	4.05901	4.0148		3.946	3.948	3.98042		0.0245945	0.113009	0.0688016		0.0225945	0.111009	0.0668016		-0.00982942	0.0785849	0.0343777
65_Pyridine-Ethyne_1.10_dimer.out	-325.177	65_Pyridine-Ethyne_1.10_cpA.out	-77.2223	65_Pyridine-Ethyne_1.10_cpB.out	-247.949	65_Pyridine-Ethyne_1.00_monomerA.out	-247.949	65_Pyridine-Ethyne_1.00_monomerB.out	-77.2223		3.7421	3.81914	3.78062		3.724	3.727	3.75493		0.0180988	0.0951363	0.0566175		0.0150988	0.0921363	0.0536175		-0.0128285	0.064209	0.0256902
65_Pyridine-Ethyne_1.25_dimer.out	-325.176	65_Pyridine-Ethyne_1.25_cpA.out	-77.2223	65_Pyridine-Ethyne_1.25_cpB.out	-247.949	65_Pyridine-Ethyne_1.00_monomerA.out	-247.949	65_Pyridine-Ethyne_1.00_monomerB.out	-77.2223		2.8649	2.9184	2.89165		2.866	2.87	2.88766		-0.00110002	0.0523974	0.0256487		-0.00510002	0.0483974	0.0216487		-0.0227575	0.0307399	0.00399121
65_Pyridine-Ethyne_1.50_dimer.out	-325.174	65_Pyridine-Ethyne_1.50_cpA.out	-77.2223	65_Pyridine-Ethyne_1.50_cpB.out	-247.949	65_Pyridine-Ethyne_1.00_monomerA.out	-247.949	65_Pyridine-Ethyne_1.00_monomerB.out	-77.2223		1.66041	1.69165	1.67603		1.679	1.684	1.69428		-0.0185929	0.012654	-0.00296943		-0.0235929	0.00765402	-0.00796943		-0.0338761	-0.00262916	-0.0182526
65_Pyridine-Ethyne_2.00_dimer.out	-325.172	65_Pyridine-Ethyne_2.00_cpA.out	-77.2223	65_Pyridine-Ethyne_2.00_cpB.out	-247.949	65_Pyridine-Ethyne_1.00_monomerA.out	-247.949	65_Pyridine-Ethyne_1.00_monomerB.out	-77.2223		0.60761	0.619538	0.613574		0.618	0.623	0.627307		-0.0103896	0.00153826	-0.00442569		-0.0153896	-0.00346174	-0.00942569		-0.0196967	-0.00776875	-0.0137327
66_MeNH2-Pyridine_0.90_dimer.out	-343.693	66_MeNH2-Pyridine_0.90_cpA.out	-247.949	66_MeNH2-Pyridine_0.90_cpB.out	-95.7391	66_MeNH2-Pyridine_1.00_monomerA.out	-95.739	66_MeNH2-Pyridine_1.00_monomerB.out	-247.949		3.13264	3.32933	3.23099		3.36	3.357	3.43499		-0.227364	-0.030666	-0.129015		-0.224364	-0.027666	-0.126015		-0.302357	-0.105659	-0.204008
66_MeNH2-Pyridine_0.95_dimer.out	-343.694	66_MeNH2-Pyridine_0.95_cpA.out	-247.949	66_MeNH2-Pyridine_0.95_cpB.out	-95.7391	66_MeNH2-Pyridine_1.00_monomerA.out	-95.739	66_MeNH2-Pyridine_1.00_monomerB.out	-247.949		3.61823	3.78744	3.70283		3.796	3.803	3.87		-0.177774	-0.00856005	-0.0931669		-0.184774	-0.0155601	-0.100167		-0.251773	-0.0825595	-0.167166
66_MeNH2-Pyridine_1.00_dimer.out	-343.694	66_MeNH2-Pyridine_1.00_cpA.out	-247.949	66_MeNH2-Pyridine_1.00_cpB.out	-95.7391	66_MeNH2-Pyridine_1.00_monomerA.out	-95.739	66_MeNH2-Pyridine_1.00_monomerB.out	-247.949		3.75342	3.89984	3.82663		3.893	3.907	3.96422		-0.139585	0.00684358	-0.0663705		-0.153585	-0.00715642	-0.0803705		-0.210802	-0.0643743	-0.137588
66_MeNH2-Pyridine_1.05_dimer.out	-343.694	66_MeNH2-Pyridine_1.05_cpA.out	-247.949	66_MeNH2-Pyridine_1.05_cpB.out	-95.739	66_MeNH2-Pyridine_1.00_monomerA.out	-95.739	66_MeNH2-Pyridine_1.00_monomerB.out	-247.949		3.67333	3.8005	3.73692		3.784	3.803	3.85203		-0.11067	0.016501	-0.0470847		-0.12967	-0.002499	-0.0660847		-0.178704	-0.051533	-0.115119
66_MeNH2-Pyridine_1.10_dimer.out	-343.693	66_MeNH2-Pyridine_1.10_cpA.out	-247.949	66_MeNH2-Pyridine_1.10_cpB.out	-95.739	66_MeNH2-Pyridine_1.00_monomerA.out	-95.739	66_MeNH2-Pyridine_1.00_monomerB.out	-247.949		3.4693	3.57953	3.52441		3.56	3.582	3.62322		-0.0907023	0.0195323	-0.035585		-0.112702	-0.00246775	-0.057585		-0.153927	-0.0436925	-0.0988097
66_MeNH2-Pyridine_1.25_dimer.out	-343.692	66_MeNH2-Pyridine_1.25_cpA.out	-247.949	66_MeNH2-Pyridine_1.25_cpB.out	-95.739	66_MeNH2-Pyridine_1.00_monomerA.out	-95.739	66_MeNH2-Pyridine_1.00_monomerB.out	-247.949		2.61231	2.68653	2.64942		2.677	2.697	2.72364		-0.0646886	0.00952538	-0.0275816		-0.0846886	-0.0104746	-0.0475816		-0.111332	-0.0371178	-0.0742248
66_MeNH2-Pyridine_1.50_dimer.out	-343.69	66_MeNH2-Pyridine_1.50_cpA.out	-247.949	66_MeNH2-Pyridine_1.50_cpB.out	-95.739	66_MeNH2-Pyridine_1.00_monomerA.out	-95.739	66_MeNH2-Pyridine_1.00_monomerB.out	-247.949		1.43283	1.47309	1.45296		1.488	1.502	1.51634		-0.0551669	-0.0149055	-0.0350362		-0.0691669	-0.0289055	-0.0490362		-0.0835115	-0.0432501	-0.0633808
66_MeNH2-Pyridine_2.00_dimer.out	-343.688	66_MeNH2-Pyridine_2.00_cpA.out	-247.949	66_MeNH2-Pyridine_2.00_cpB.out	-95.739	66_MeNH2-Pyridine_1.00_monomerA.out	-95.739	66_MeNH2-Pyridine_1.00_monomerB.out	-247.949		0.468831	0.482082	0.475456		0.49	0.497	0.502315		-0.0211694	-0.00791767	-0.0145435		-0.0281694	-0.0149177	-0.0215435		-0.033484	-0.0202322	-0.0268581

## Sheet: revDSD-PBEP86-D4 haVQZ
																		MSD	-0.130483	0.0173676	-0.0565578		-0.145311	0.00253996	-0.0713854		-0.199282	-0.0514316	-0.125357
																		RMSD	0.229046	0.160797	0.173298		0.240442	0.152095	0.177047		0.301167	0.171512	0.225681
/work/golokesh/projects/S66x8/revDSD-PBEP86-D4-haVQZ																			cp	raw	half		cp	raw	half		cp	raw	half
																		H bonds	0.210517	0.0918331	0.139405		0.196086	0.0927039	0.128764		0.259836	0.12234	0.1852
																		pi stack	0.212486	0.273925	0.194172		0.251257	0.221067	0.183331		0.328698	0.191919	0.223713
																		London	0.355193	0.186039	0.268493		0.382287	0.21027	0.294755		0.453922	0.278513	0.365389
																		mixed	0.132588	0.124944	0.105113		0.141439	0.115242	0.105339		0.183636	0.105	0.129719
															REF S66x8				errors w.r.t. rev2022				errors w.r.t. Opus 279				errors w.r.t. Opus 268
															S66x8rev2022	BRONZE
											cp	raw	half		Golokesh,Semidalas,Mehta,Karton,Martin	Opus279	Opus268		cp	raw	half		cp	raw	half		cp	raw	half
01_Water-Water_0.90_dimer.out	-152.734	01_Water-Water_0.90_cpA.out	-76.3632	01_Water-Water_0.90_cpB.out	-76.3631	01_Water-Water_1.00_monomerA.out	-76.3631	01_Water-Water_1.00_monomerB.out	-76.3631		4.57427	4.71083	4.64255		4.666	4.61	4.65882		-0.0917284	0.0448309	-0.0234487		-0.0357284	0.100831	0.0325513		-0.0845474	0.0520119	-0.0162677			revDSD-PBEP86-D4/haVQZ
01_Water-Water_0.95_dimer.out	-152.734	01_Water-Water_0.95_cpA.out	-76.3632	01_Water-Water_0.95_cpB.out	-76.3631	01_Water-Water_1.00_monomerA.out	-76.3631	01_Water-Water_1.00_monomerB.out	-76.3631		4.8934	5.00847	4.95094		4.954	4.912	4.95377		-0.0606015	0.0544722	-0.00306464		-0.0186015	0.0964722	0.0389354		-0.0603737	0.0546999	-0.00283689		REF		raw	cp	half
01_Water-Water_1.00_dimer.out	-152.734	01_Water-Water_1.00_cpA.out	-76.3632	01_Water-Water_1.00_cpB.out	-76.3631	01_Water-Water_1.00_monomerA.out	-76.3631	01_Water-Water_1.00_monomerB.out	-76.3631		4.90969	5.00758	4.95863		4.946	4.915	4.95065		-0.0363117	0.0615785	0.0126334		-0.00531171	0.0925785	0.0436334		-0.0409636	0.0569266	0.00798148		Sterling Silver	RMSD	0.160797	0.229046	0.173298
01_Water-Water_1.05_dimer.out	-152.734	01_Water-Water_1.05_cpA.out	-76.3632	01_Water-Water_1.05_cpB.out	-76.3631	01_Water-Water_1.00_monomerA.out	-76.3631	01_Water-Water_1.00_monomerB.out	-76.3631		4.7428	4.82644	4.78462		4.762	4.739	4.76839		-0.0192021	0.0644358	0.0226168		0.00379787	0.0874358	0.0456168		-0.0255884	0.0580495	0.0162306		Golokesh,Semidalas,Mehta,Karton,Martin	H bonds	0.0918331	0.210517	0.139405
01_Water-Water_1.10_dimer.out	-152.733	01_Water-Water_1.10_cpA.out	-76.3632	01_Water-Water_1.10_cpB.out	-76.3631	01_Water-Water_1.00_monomerA.out	-76.3631	01_Water-Water_1.00_monomerB.out	-76.3631		4.47259	4.54405	4.50832		4.48	4.462	4.48656		-0.00740922	0.064054	0.0283224		0.0105908	0.082054	0.0463224		-0.0139721	0.0574912	0.0217596			pi stack	0.273925	0.212486	0.194172
01_Water-Water_1.25_dimer.out	-152.732	01_Water-Water_1.25_cpA.out	-76.3631	01_Water-Water_1.25_cpB.out	-76.3631	01_Water-Water_1.00_monomerA.out	-76.3631	01_Water-Water_1.00_monomerB.out	-76.3631		3.47711	3.52262	3.49986		3.47	3.46	3.47347		0.00710691	0.0526227	0.0298648		0.0171069	0.0626227	0.0398648		0.00364126	0.0491571	0.0263992			London	0.186039	0.355193	0.268493
01_Water-Water_1.50_dimer.out	-152.73	01_Water-Water_1.50_cpA.out	-76.3631	01_Water-Water_1.50_cpB.out	-76.3631	01_Water-Water_1.00_monomerA.out	-76.3631	01_Water-Water_1.00_monomerB.out	-76.3631		2.11563	2.14103	2.12833		2.117	2.108	2.11314		-0.00137231	0.0240309	0.0113293		0.00762769	0.0330309	0.0203293		0.00248982	0.027893	0.0151914			mixed	0.124944	0.132588	0.105113
01_Water-Water_2.00_dimer.out	-152.728	01_Water-Water_2.00_cpA.out	-76.3631	01_Water-Water_2.00_cpB.out	-76.3631	01_Water-Water_1.00_monomerA.out	-76.3631	01_Water-Water_1.00_monomerB.out	-76.3631		0.869119	0.878238	0.873678		0.874	0.871	0.871683		-0.00488076	0.00423775	-0.000321502		-0.00188076	0.00723775	0.0026785		-0.00256409	0.00655442	0.00199516		Opus279	RMSD	0.152095	0.240442	0.177047
02_Water-MeOH_0.90_dimer.out	-191.97	02_Water-MeOH_0.90_cpA.out	-115.599	02_Water-MeOH_0.90_cpB.out	-76.3632	02_Water-MeOH_1.00_monomerA.out	-76.3631	02_Water-MeOH_1.00_monomerB.out	-115.599		5.12054	5.28765	5.20409		5.298	5.232	5.29278		-0.177462	-0.0103481	-0.0939051		-0.111462	0.0556519	-0.0279051		-0.172247	-0.00513263	-0.0886897			H bonds	0.0927039	0.196086	0.128764
02_Water-MeOH_0.95_dimer.out	-191.971	02_Water-MeOH_0.95_cpA.out	-115.599	02_Water-MeOH_0.95_cpB.out	-76.3632	02_Water-MeOH_1.00_monomerA.out	-76.3631	02_Water-MeOH_1.00_monomerB.out	-115.599		5.49312	5.63497	5.56405		5.629	5.578	5.63046		-0.135877	0.00596671	-0.064955		-0.0848767	0.0569667	-0.013955		-0.137338	0.00450492	-0.0664168			pi stack	0.221067	0.251257	0.183331
02_Water-MeOH_1.00_dimer.out	-191.971	02_Water-MeOH_1.00_cpA.out	-115.599	02_Water-MeOH_1.00_cpB.out	-76.3631	02_Water-MeOH_1.00_monomerA.out	-76.3631	02_Water-MeOH_1.00_monomerB.out	-115.599		5.52476	5.64609	5.58543		5.627	5.589	5.63423		-0.10224	0.0190948	-0.0415724		-0.0642396	0.0570948	-0.00357243		-0.109467	0.0118678	-0.0487994			London	0.21027	0.382287	0.294755
02_Water-MeOH_1.05_dimer.out	-191.97	02_Water-MeOH_1.05_cpA.out	-115.599	02_Water-MeOH_1.05_cpB.out	-76.3631	02_Water-MeOH_1.00_monomerA.out	-76.3631	02_Water-MeOH_1.00_monomerB.out	-115.599		5.34732	5.45164	5.39948		5.423	5.396	5.43386		-0.075684	0.0286394	-0.0235223		-0.048684	0.0556394	0.00347767		-0.0865477	0.0177757	-0.034386			mixed	0.115242	0.141439	0.105339
02_Water-MeOH_1.10_dimer.out	-191.97	02_Water-MeOH_1.10_cpA.out	-115.599	02_Water-MeOH_1.10_cpB.out	-76.3631	02_Water-MeOH_1.00_monomerA.out	-76.3631	02_Water-MeOH_1.00_monomerB.out	-115.599		5.04965	5.13944	5.09455		5.106	5.086	5.11853		-0.0563459	0.0334443	-0.0114508		-0.0363459	0.0534443	0.00854921		-0.0688776	0.0209126	-0.0239825		Opus268	RMSD	0.171512	0.301167	0.225681
02_Water-MeOH_1.25_dimer.out	-191.968	02_Water-MeOH_1.25_cpA.out	-115.599	02_Water-MeOH_1.25_cpB.out	-76.3631	02_Water-MeOH_1.00_monomerA.out	-76.3631	02_Water-MeOH_1.00_monomerB.out	-115.599		3.92859	3.98614	3.95736		3.956	3.947	3.96658		-0.0274131	0.0301376	0.00136227		-0.0184131	0.0391376	0.0103623		-0.0379924	0.0195583	-0.00921703			H bonds	0.12234	0.259836	0.1852
02_Water-MeOH_1.50_dimer.out	-191.966	02_Water-MeOH_1.50_cpA.out	-115.599	02_Water-MeOH_1.50_cpB.out	-76.3631	02_Water-MeOH_1.00_monomerA.out	-76.3631	02_Water-MeOH_1.00_monomerB.out	-115.599		2.36769	2.39917	2.38343		2.391	2.385	2.39407		-0.0233061	0.00817375	-0.00756619		-0.0173061	0.0141737	-0.00156619		-0.0263764	0.00510346	-0.0106365			pi stack	0.191919	0.328698	0.223713
02_Water-MeOH_2.00_dimer.out	-191.963	02_Water-MeOH_2.00_cpA.out	-115.599	02_Water-MeOH_2.00_cpB.out	-76.3631	02_Water-MeOH_1.00_monomerA.out	-76.3631	02_Water-MeOH_1.00_monomerB.out	-115.599		0.931163	0.940913	0.936038		0.954	0.952	0.954668		-0.0228372	-0.0130865	-0.0179619		-0.0208372	-0.0110865	-0.0159619		-0.0235051	-0.0137544	-0.0186298			London	0.278513	0.453922	0.365389
03_Water-MeNH2_0.90_dimer.out	-172.111	03_Water-MeNH2_0.90_cpA.out	-95.7375	03_Water-MeNH2_0.90_cpB.out	-76.3631	03_Water-MeNH2_1.00_monomerA.out	-76.363	03_Water-MeNH2_1.00_monomerB.out	-95.7374		6.57523	6.73922	6.65722		6.606	6.53	6.57684		-0.0307698	0.133219	0.0512247		0.0452302	0.209219	0.127225		-0.00160532	0.162384	0.0803892			mixed	0.105	0.183636	0.129719
03_Water-MeNH2_0.95_dimer.out	-172.112	03_Water-MeNH2_0.95_cpA.out	-95.7375	03_Water-MeNH2_0.95_cpB.out	-76.3631	03_Water-MeNH2_1.00_monomerA.out	-76.363	03_Water-MeNH2_1.00_monomerB.out	-95.7374		6.949	7.08756	7.01828		6.957	6.897	6.93748		-0.00799581	0.130557	0.0612807		0.0520042	0.190557	0.121281		0.011527	0.15008	0.0808035
03_Water-MeNH2_1.00_dimer.out	-172.112	03_Water-MeNH2_1.00_cpA.out	-95.7375	03_Water-MeNH2_1.00_cpB.out	-76.3631	03_Water-MeNH2_1.00_monomerA.out	-76.363	03_Water-MeNH2_1.00_monomerB.out	-95.7374		6.9494	7.06714	7.00827		6.941	6.894	6.9286		0.00840412	0.126138	0.0672712		0.0554041	0.173138	0.114271		0.020805	0.138539	0.0796721
03_Water-MeNH2_1.05_dimer.out	-172.111	03_Water-MeNH2_1.05_cpA.out	-95.7375	03_Water-MeNH2_1.05_cpB.out	-76.3631	03_Water-MeNH2_1.00_monomerA.out	-76.363	03_Water-MeNH2_1.00_monomerB.out	-95.7374		6.71614	6.81677	6.76645		6.695	6.66	6.68924		0.0211372	0.12177	0.0714535		0.0561372	0.15677	0.106453		0.0268987	0.127531	0.0772149
03_Water-MeNH2_1.10_dimer.out	-172.111	03_Water-MeNH2_1.10_cpA.out	-95.7374	03_Water-MeNH2_1.10_cpB.out	-76.363	03_Water-MeNH2_1.00_monomerA.out	-76.363	03_Water-MeNH2_1.00_monomerB.out	-95.7374		6.34539	6.43204	6.38871		6.318	6.291	6.31548		0.027386	0.114035	0.0707105		0.054386	0.141035	0.0977105		0.0299034	0.116552	0.0732279
03_Water-MeNH2_1.25_dimer.out	-172.108	03_Water-MeNH2_1.25_cpA.out	-95.7374	03_Water-MeNH2_1.25_cpB.out	-76.363	03_Water-MeNH2_1.00_monomerA.out	-76.363	03_Water-MeNH2_1.00_monomerB.out	-95.7374		4.95634	5.01346	4.9849		4.928	4.916	4.93163		0.0283388	0.0854634	0.0569011		0.0403388	0.0974634	0.0689011		0.0247116	0.0818362	0.0532739
03_Water-MeNH2_1.50_dimer.out	-172.105	03_Water-MeNH2_1.50_cpA.out	-95.7374	03_Water-MeNH2_1.50_cpB.out	-76.363	03_Water-MeNH2_1.00_monomerA.out	-76.363	03_Water-MeNH2_1.00_monomerB.out	-95.7374		2.97847	3.00897	2.99372		2.98	2.973	2.9817		-0.00152935	0.0289688	0.0137197		0.00547065	0.0359688	0.0207197		-0.00323275	0.0272654	0.0120163
03_Water-MeNH2_2.00_dimer.out	-172.102	03_Water-MeNH2_2.00_cpA.out	-95.7374	03_Water-MeNH2_2.00_cpB.out	-76.363	03_Water-MeNH2_1.00_monomerA.out	-76.363	03_Water-MeNH2_1.00_monomerB.out	-95.7374		1.11324	1.12332	1.11828		1.142	1.14	1.14331		-0.0287583	-0.0186762	-0.0237172		-0.0267583	-0.0166762	-0.0217172		-0.0300661	-0.019984	-0.0250251
04_Water-Peptide_0.90_dimer.out	-324.604	04_Water-Peptide_0.90_cpA.out	-248.229	04_Water-Peptide_0.90_cpB.out	-76.3632	04_Water-Peptide_1.00_monomerA.out	-76.363	04_Water-Peptide_1.00_monomerB.out	-248.229		7.45308	7.66316	7.55812		7.739	7.666	7.74844		-0.285923	-0.0758437	-0.180884		-0.212923	-0.00284368	-0.107884		-0.29536	-0.0852806	-0.19032
04_Water-Peptide_0.95_dimer.out	-324.605	04_Water-Peptide_0.95_cpA.out	-248.229	04_Water-Peptide_0.95_cpB.out	-76.3632	04_Water-Peptide_1.00_monomerA.out	-76.363	04_Water-Peptide_1.00_monomerB.out	-248.229		7.90031	8.08172	7.99102		8.131	8.076	8.14892		-0.230691	-0.0492755	-0.139983		-0.175691	0.00572448	-0.0849834		-0.248607	-0.0671907	-0.157899
04_Water-Peptide_1.00_dimer.out	-324.605	04_Water-Peptide_1.00_cpA.out	-248.229	04_Water-Peptide_1.00_cpB.out	-76.3631	04_Water-Peptide_1.00_monomerA.out	-76.363	04_Water-Peptide_1.00_monomerB.out	-248.229		7.9446	8.10233	8.02346		8.128	8.089	8.153		-0.183403	-0.0256734	-0.104538		-0.144403	0.0133266	-0.0655382		-0.208399	-0.0506695	-0.129534
04_Water-Peptide_1.05_dimer.out	-324.604	04_Water-Peptide_1.05_cpA.out	-248.229	04_Water-Peptide_1.05_cpB.out	-76.3631	04_Water-Peptide_1.00_monomerA.out	-76.363	04_Water-Peptide_1.00_monomerB.out	-248.229		7.73353	7.87148	7.80251		7.878	7.851	7.90748		-0.14447	-0.00651525	-0.0754927		-0.11747	0.0204847	-0.0484927		-0.173947	-0.0359921	-0.10497
04_Water-Peptide_1.10_dimer.out	-324.604	04_Water-Peptide_1.10_cpA.out	-248.229	04_Water-Peptide_1.10_cpB.out	-76.3631	04_Water-Peptide_1.00_monomerA.out	-76.363	04_Water-Peptide_1.00_monomerB.out	-248.229		7.36924	7.49044	7.42984		7.482	7.465	7.51416		-0.112758	0.00843648	-0.052161		-0.0957584	0.0254365	-0.035161		-0.144915	-0.0237201	-0.0843176
04_Water-Peptide_1.25_dimer.out	-324.601	04_Water-Peptide_1.25_cpA.out	-248.229	04_Water-Peptide_1.25_cpB.out	-76.3631	04_Water-Peptide_1.00_monomerA.out	-76.363	04_Water-Peptide_1.00_monomerB.out	-248.229		5.93673	6.02015	5.97844		5.994	5.991	6.02344		-0.0572705	0.0261529	-0.0155588		-0.0542705	0.0291529	-0.0125588		-0.0867144	-0.00329094	-0.0450026
04_Water-Peptide_1.50_dimer.out	-324.598	04_Water-Peptide_1.50_cpA.out	-248.229	04_Water-Peptide_1.50_cpB.out	-76.3631	04_Water-Peptide_1.00_monomerA.out	-76.363	04_Water-Peptide_1.00_monomerB.out	-248.229		3.79238	3.84058	3.81648		3.83	3.828	3.84403		-0.0376171	0.0105763	-0.0135204		-0.0356171	0.0125763	-0.0115204		-0.0516521	-0.00345858	-0.0275553
04_Water-Peptide_2.00_dimer.out	-324.594	04_Water-Peptide_2.00_cpA.out	-248.229	04_Water-Peptide_2.00_cpB.out	-76.363	04_Water-Peptide_1.00_monomerA.out	-76.363	04_Water-Peptide_1.00_monomerB.out	-248.229		1.40227	1.41611	1.40919		1.439	1.437	1.44228		-0.0367293	-0.0228906	-0.0298099		-0.0347293	-0.0208906	-0.0278099		-0.0400109	-0.0261722	-0.0330915
05_MeOH-MeOH_0.90_dimer.out	-231.206	05_MeOH-MeOH_0.90_cpA.out	-115.599	05_MeOH-MeOH_0.90_cpB.out	-115.599	05_MeOH-MeOH_1.00_monomerA.out	-115.599	05_MeOH-MeOH_1.00_monomerB.out	-115.599		5.1583	5.33529	5.2468		5.387	5.328	5.39588		-0.228699	-0.0517082	-0.140204		-0.169699	0.00729178	-0.0812038		-0.237582	-0.060591	-0.149087
05_MeOH-MeOH_0.95_dimer.out	-231.206	05_MeOH-MeOH_0.95_cpA.out	-115.599	05_MeOH-MeOH_0.95_cpB.out	-115.599	05_MeOH-MeOH_1.00_monomerA.out	-115.599	05_MeOH-MeOH_1.00_monomerB.out	-115.599		5.59183	5.74181	5.66682		5.771	5.727	5.78687		-0.179168	-0.0291884	-0.104178		-0.135168	0.0148116	-0.0601782		-0.195035	-0.0450553	-0.120045
05_MeOH-MeOH_1.00_dimer.out	-231.206	05_MeOH-MeOH_1.00_cpA.out	-115.599	05_MeOH-MeOH_1.00_cpB.out	-115.599	05_MeOH-MeOH_1.00_monomerA.out	-115.599	05_MeOH-MeOH_1.00_monomerB.out	-115.599		5.66448	5.79267	5.72858		5.804	5.773	5.82437		-0.139517	-0.011328	-0.0754227		-0.108517	0.019672	-0.0444227		-0.159888	-0.031699	-0.0957938
05_MeOH-MeOH_1.05_dimer.out	-231.206	05_MeOH-MeOH_1.05_cpA.out	-115.599	05_MeOH-MeOH_1.05_cpB.out	-115.599	05_MeOH-MeOH_1.00_monomerA.out	-115.599	05_MeOH-MeOH_1.00_monomerB.out	-115.599		5.51347	5.62382	5.56864		5.62	5.599	5.64391		-0.106534	0.00382258	-0.0513559		-0.0855344	0.0248226	-0.0303559		-0.130447	-0.0200904	-0.0752689
05_MeOH-MeOH_1.10_dimer.out	-231.206	05_MeOH-MeOH_1.10_cpA.out	-115.599	05_MeOH-MeOH_1.10_cpB.out	-115.599	05_MeOH-MeOH_1.00_monomerA.out	-115.599	05_MeOH-MeOH_1.00_monomerB.out	-115.599		5.23078	5.32623	5.27851		5.312	5.299	5.33682		-0.0812206	0.0142329	-0.0334938		-0.0682206	0.0272329	-0.0204938		-0.106045	-0.0105916	-0.0583183
05_MeOH-MeOH_1.25_dimer.out	-231.204	05_MeOH-MeOH_1.25_cpA.out	-115.599	05_MeOH-MeOH_1.25_cpB.out	-115.599	05_MeOH-MeOH_1.00_monomerA.out	-115.599	05_MeOH-MeOH_1.00_monomerB.out	-115.599		4.11229	4.17525	4.14377		4.151	4.147	4.17157		-0.0387083	0.0242509	-0.00722871		-0.0347083	0.0282509	-0.00322871		-0.0592758	0.00368343	-0.0277962
05_MeOH-MeOH_1.50_dimer.out	-231.201	05_MeOH-MeOH_1.50_cpA.out	-115.599	05_MeOH-MeOH_1.50_cpB.out	-115.599	05_MeOH-MeOH_1.00_monomerA.out	-115.599	05_MeOH-MeOH_1.00_monomerB.out	-115.599		2.50626	2.54181	2.52404		2.528	2.526	2.53824		-0.0217399	0.0138114	-0.00396425		-0.0197399	0.0158114	-0.00196425		-0.0319839	0.00356741	-0.0142082
05_MeOH-MeOH_2.00_dimer.out	-231.199	05_MeOH-MeOH_2.00_cpA.out	-115.599	05_MeOH-MeOH_2.00_cpB.out	-115.599	05_MeOH-MeOH_1.00_monomerA.out	-115.599	05_MeOH-MeOH_1.00_monomerB.out	-115.599		0.995433	1.00745	1.00144		1.011	1.01	1.01501		-0.0155672	-0.00354648	-0.00955685		-0.0145672	-0.00254648	-0.00855685		-0.0195814	-0.00756062	-0.013571
06_MeOH-MeNH2_0.90_dimer.out	-211.347	06_MeOH-MeNH2_0.90_cpA.out	-95.7376	06_MeOH-MeNH2_0.90_cpB.out	-115.598	06_MeOH-MeNH2_1.00_monomerA.out	-115.598	06_MeOH-MeNH2_1.00_monomerB.out	-95.7374		6.93965	7.12885	7.03425		7.081	7.006	7.06731		-0.141353	0.0478468	-0.0467532		-0.0663532	0.122847	0.0282468		-0.127662	0.0615384	-0.0330616
06_MeOH-MeNH2_0.95_dimer.out	-211.348	06_MeOH-MeNH2_0.95_cpA.out	-95.7375	06_MeOH-MeNH2_0.95_cpB.out	-115.598	06_MeOH-MeNH2_1.00_monomerA.out	-115.598	06_MeOH-MeNH2_1.00_monomerB.out	-95.7374		7.45535	7.61584	7.5356		7.554	7.497	7.54963		-0.0986491	0.0618431	-0.018403		-0.0416491	0.118843	0.038597		-0.0942827	0.0662095	-0.0140366
06_MeOH-MeNH2_1.00_dimer.out	-211.348	06_MeOH-MeNH2_1.00_cpA.out	-95.7375	06_MeOH-MeNH2_1.00_cpB.out	-115.598	06_MeOH-MeNH2_1.00_monomerA.out	-115.598	06_MeOH-MeNH2_1.00_monomerB.out	-95.7374		7.53521	7.67182	7.60351		7.601	7.558	7.60314		-0.0657917	0.0708209	0.00251463		-0.0227917	0.113821	0.0455146		-0.0679291	0.0686835	0.000377171
06_MeOH-MeNH2_1.05_dimer.out	-211.348	06_MeOH-MeNH2_1.05_cpA.out	-95.7375	06_MeOH-MeNH2_1.05_cpB.out	-115.598	06_MeOH-MeNH2_1.00_monomerA.out	-115.598	06_MeOH-MeNH2_1.00_monomerB.out	-95.7374		7.33806	7.45474	7.3964		7.378	7.346	7.38503		-0.0399424	0.0767384	0.018398		-0.00794236	0.108738	0.050398		-0.0469679	0.0697129	0.0113725
06_MeOH-MeNH2_1.10_dimer.out	-211.347	06_MeOH-MeNH2_1.10_cpA.out	-95.7375	06_MeOH-MeNH2_1.10_cpB.out	-115.598	06_MeOH-MeNH2_1.00_monomerA.out	-115.598	06_MeOH-MeNH2_1.00_monomerB.out	-95.7374		6.9735	7.07406	7.02378		6.994	6.971	7.00455		-0.0204967	0.0800633	0.0297833		0.00250327	0.103063	0.0527833		-0.0310457	0.0695144	0.0192344
06_MeOH-MeNH2_1.25_dimer.out	-211.345	06_MeOH-MeNH2_1.25_cpA.out	-95.7374	06_MeOH-MeNH2_1.25_cpB.out	-115.598	06_MeOH-MeNH2_1.00_monomerA.out	-115.598	06_MeOH-MeNH2_1.00_monomerB.out	-95.7374		5.50993	5.57725	5.54359		5.505	5.497	5.51719		0.0049264	0.0722497	0.038588		0.0129264	0.0802497	0.046588		-0.0072677	0.0600556	0.0263939
06_MeOH-MeNH2_1.50_dimer.out	-211.341	06_MeOH-MeNH2_1.50_cpA.out	-95.7374	06_MeOH-MeNH2_1.50_cpB.out	-115.598	06_MeOH-MeNH2_1.00_monomerA.out	-115.598	06_MeOH-MeNH2_1.00_monomerB.out	-95.7374		3.3426	3.37984	3.36122		3.345	3.342	3.35163		-0.00239661	0.0348364	0.0162199		0.000603393	0.0378364	0.0192199		-0.00902539	0.0282076	0.0095911
06_MeOH-MeNH2_2.00_dimer.out	-211.338	06_MeOH-MeNH2_2.00_cpA.out	-95.7374	06_MeOH-MeNH2_2.00_cpB.out	-115.598	06_MeOH-MeNH2_1.00_monomerA.out	-115.598	06_MeOH-MeNH2_1.00_monomerB.out	-95.7374		1.25571	1.26833	1.26202		1.273	1.273	1.2771		-0.0172928	-0.00467056	-0.0109817		-0.0172928	-0.00467056	-0.0109817		-0.0213924	-0.00877007	-0.0150812
07_MeOH-Peptide_0.90_dimer.out	-363.839	07_MeOH-Peptide_0.90_cpA.out	-248.229	07_MeOH-Peptide_0.90_cpB.out	-115.599	07_MeOH-Peptide_1.00_monomerA.out	-115.598	07_MeOH-Peptide_1.00_monomerB.out	-248.229		7.41304	7.63698	7.52501		7.756	7.689	7.78382		-0.342955	-0.119022	-0.230989		-0.275955	-0.052022	-0.163989		-0.370775	-0.146842	-0.258809
07_MeOH-Peptide_0.95_dimer.out	-363.84	07_MeOH-Peptide_0.95_cpA.out	-248.229	07_MeOH-Peptide_0.95_cpB.out	-115.599	07_MeOH-Peptide_1.00_monomerA.out	-115.598	07_MeOH-Peptide_1.00_monomerB.out	-248.229		7.9547	8.14731	8.051		8.235	8.186	8.27017		-0.280302	-0.0876949	-0.183999		-0.231302	-0.0386949	-0.134999		-0.315468	-0.12286	-0.219164
07_MeOH-Peptide_1.00_dimer.out	-363.84	07_MeOH-Peptide_1.00_cpA.out	-248.229	07_MeOH-Peptide_1.00_cpB.out	-115.599	07_MeOH-Peptide_1.00_monomerA.out	-115.598	07_MeOH-Peptide_1.00_monomerB.out	-248.229		8.06239	8.22929	8.14584		8.289	8.255	8.32956		-0.226611	-0.0597114	-0.143161		-0.192611	-0.0257114	-0.109161		-0.267169	-0.100269	-0.183719
07_MeOH-Peptide_1.05_dimer.out	-363.84	07_MeOH-Peptide_1.05_cpA.out	-248.229	07_MeOH-Peptide_1.05_cpB.out	-115.598	07_MeOH-Peptide_1.00_monomerA.out	-115.598	07_MeOH-Peptide_1.00_monomerB.out	-248.229		7.89116	8.03683	7.964		8.072	8.051	8.11612		-0.180842	-0.0351682	-0.108005		-0.159842	-0.0141682	-0.0870049		-0.22496	-0.0792866	-0.152123
07_MeOH-Peptide_1.10_dimer.out	-363.84	07_MeOH-Peptide_1.10_cpA.out	-248.229	07_MeOH-Peptide_1.10_cpB.out	-115.598	07_MeOH-Peptide_1.00_monomerA.out	-115.598	07_MeOH-Peptide_1.00_monomerB.out	-248.229		7.5488	7.67668	7.61274		7.692	7.68	7.73713		-0.143199	-0.0153197	-0.0792592		-0.131199	-0.00331972	-0.0672592		-0.188333	-0.0604539	-0.124393
07_MeOH-Peptide_1.25_dimer.out	-363.837	07_MeOH-Peptide_1.25_cpA.out	-248.229	07_MeOH-Peptide_1.25_cpB.out	-115.598	07_MeOH-Peptide_1.00_monomerA.out	-115.598	07_MeOH-Peptide_1.00_monomerB.out	-248.229		6.11803	6.20585	6.16194		6.188	6.19	6.2281		-0.0699658	0.0178454	-0.0260602		-0.0719658	0.0158454	-0.0280602		-0.11007	-0.0222587	-0.0661643
07_MeOH-Peptide_1.50_dimer.out	-363.833	07_MeOH-Peptide_1.50_cpA.out	-248.229	07_MeOH-Peptide_1.50_cpB.out	-115.598	07_MeOH-Peptide_1.00_monomerA.out	-115.598	07_MeOH-Peptide_1.00_monomerB.out	-248.229		3.61871	3.66675	3.64273		3.647	3.649	3.66818		-0.0282889	0.019749	-0.00426997		-0.0302889	0.017749	-0.00626997		-0.049473	-0.00143507	-0.025454
07_MeOH-Peptide_2.00_dimer.out	-363.829	07_MeOH-Peptide_2.00_cpA.out	-248.229	07_MeOH-Peptide_2.00_cpB.out	-115.598	07_MeOH-Peptide_1.00_monomerA.out	-115.598	07_MeOH-Peptide_1.00_monomerB.out	-248.229		1.08699	1.09938	1.09318		1.098	1.099	1.10412		-0.0110122	0.00138004	-0.00481609		-0.0120122	0.000380043	-0.00581609		-0.0171335	-0.00474126	-0.0109374
08_MeOH-Water_0.90_dimer.out	-191.969	08_MeOH-Water_0.90_cpA.out	-76.3633	08_MeOH-Water_0.90_cpB.out	-115.599	08_MeOH-Water_1.00_monomerA.out	-115.599	08_MeOH-Water_1.00_monomerB.out	-76.3631		4.52214	4.67074	4.59644		4.675	4.629	4.6843		-0.152858	-0.0042551	-0.0785565		-0.106858	0.0417449	-0.0325565		-0.162163	-0.0135599	-0.0878614
08_MeOH-Water_0.95_dimer.out	-191.97	08_MeOH-Water_0.95_cpA.out	-76.3632	08_MeOH-Water_0.95_cpB.out	-115.599	08_MeOH-Water_1.00_monomerA.out	-115.599	08_MeOH-Water_1.00_monomerB.out	-76.3631		4.90127	5.02699	4.96413		5.017	4.985	5.03233		-0.115733	0.00998979	-0.0528714		-0.0837327	0.0419898	-0.0208714		-0.131066	-0.0053435	-0.0682047
08_MeOH-Water_1.00_dimer.out	-191.97	08_MeOH-Water_1.00_cpA.out	-76.3632	08_MeOH-Water_1.00_cpB.out	-115.599	08_MeOH-Water_1.00_monomerA.out	-115.599	08_MeOH-Water_1.00_monomerB.out	-76.3631		4.95846	5.06589	5.01218		5.045	5.023	5.06346		-0.0865377	0.0208907	-0.0328235		-0.0645377	0.0428907	-0.0108235		-0.104996	0.00243241	-0.0512818
08_MeOH-Water_1.05_dimer.out	-191.969	08_MeOH-Water_1.05_cpA.out	-76.3632	08_MeOH-Water_1.05_cpB.out	-115.599	08_MeOH-Water_1.00_monomerA.out	-115.599	08_MeOH-Water_1.00_monomerB.out	-76.3631		4.81806	4.91048	4.86427		4.881	4.867	4.90126		-0.062937	0.0294753	-0.0167308		-0.048937	0.0434753	-0.00273081		-0.0831947	0.00921766	-0.0369885
08_MeOH-Water_1.10_dimer.out	-191.969	08_MeOH-Water_1.10_cpA.out	-76.3632	08_MeOH-Water_1.10_cpB.out	-115.599	08_MeOH-Water_1.00_monomerA.out	-115.599	08_MeOH-Water_1.00_monomerB.out	-76.3631		4.56348	4.64333	4.6034		4.61	4.601	4.62922		-0.0465227	0.0333284	-0.00659715		-0.0375227	0.0423284	0.00240285		-0.0657458	0.0141053	-0.0258202
08_MeOH-Water_1.25_dimer.out	-191.967	08_MeOH-Water_1.25_cpA.out	-76.3632	08_MeOH-Water_1.25_cpB.out	-115.599	08_MeOH-Water_1.00_monomerA.out	-115.599	08_MeOH-Water_1.00_monomerB.out	-76.3631		3.57661	3.62948	3.60305		3.598	3.595	3.61094		-0.0213941	0.0314845	0.00504519		-0.0183941	0.0344845	0.00804519		-0.0343387	0.0185398	-0.00789944
08_MeOH-Water_1.50_dimer.out	-191.965	08_MeOH-Water_1.50_cpA.out	-76.3631	08_MeOH-Water_1.50_cpB.out	-115.599	08_MeOH-Water_1.00_monomerA.out	-115.599	08_MeOH-Water_1.00_monomerB.out	-76.3631		2.185	2.21578	2.20039		2.205	2.201	2.20797		-0.0200047	0.0107766	-0.00461405		-0.0160047	0.0147766	-0.000614049		-0.0229732	0.00780809	-0.00758257
08_MeOH-Water_2.00_dimer.out	-191.963	08_MeOH-Water_2.00_cpA.out	-76.3631	08_MeOH-Water_2.00_cpB.out	-115.599	08_MeOH-Water_1.00_monomerA.out	-115.599	08_MeOH-Water_1.00_monomerB.out	-76.3631		0.888012	0.900902	0.894457		0.909	0.908	0.909445		-0.0209876	-0.00809843	-0.014543		-0.0199876	-0.00709843	-0.013543		-0.0214328	-0.00854366	-0.0149882
09_MeNH2-MeOH_0.90_dimer.out	-211.34	09_MeNH2-MeOH_0.90_cpA.out	-115.599	09_MeNH2-MeOH_0.90_cpB.out	-95.7374	09_MeNH2-MeOH_1.00_monomerA.out	-95.7373	09_MeNH2-MeOH_1.00_monomerB.out	-115.599		2.69616	2.81859	2.75738		2.837	2.813	2.8623		-0.140843	-0.0184055	-0.0796245		-0.116843	0.00559446	-0.0556245		-0.166142	-0.0437042	-0.104923
09_MeNH2-MeOH_0.95_dimer.out	-211.341	09_MeNH2-MeOH_0.95_cpA.out	-115.599	09_MeNH2-MeOH_0.95_cpB.out	-95.7374	09_MeNH2-MeOH_1.00_monomerA.out	-95.7373	09_MeNH2-MeOH_1.00_monomerB.out	-115.599		2.94795	3.05087	2.99941		3.051	3.037	3.07802		-0.103047	-0.000132764	-0.0515899		-0.089047	0.0138672	-0.0375899		-0.130063	-0.0271491	-0.0786062
09_MeNH2-MeOH_1.00_dimer.out	-211.341	09_MeNH2-MeOH_1.00_cpA.out	-115.599	09_MeNH2-MeOH_1.00_cpB.out	-95.7374	09_MeNH2-MeOH_1.00_monomerA.out	-95.7373	09_MeNH2-MeOH_1.00_monomerB.out	-115.599		2.95996	3.04691	3.00344		3.037	3.029	3.06325		-0.077041	0.00991184	-0.0335646		-0.069041	0.0179118	-0.0255646		-0.103293	-0.0163399	-0.0598163
09_MeNH2-MeOH_1.05_dimer.out	-211.341	09_MeNH2-MeOH_1.05_cpA.out	-115.599	09_MeNH2-MeOH_1.05_cpB.out	-95.7374	09_MeNH2-MeOH_1.00_monomerA.out	-95.7373	09_MeNH2-MeOH_1.00_monomerB.out	-115.599		2.83409	2.90774	2.87091		2.892	2.889	2.91723		-0.0579111	0.0157385	-0.0210863		-0.0549111	0.0187385	-0.0180863		-0.0831394	-0.0094898	-0.0463146
09_MeNH2-MeOH_1.10_dimer.out	-211.34	09_MeNH2-MeOH_1.10_cpA.out	-115.599	09_MeNH2-MeOH_1.10_cpB.out	-95.7374	09_MeNH2-MeOH_1.00_monomerA.out	-95.7373	09_MeNH2-MeOH_1.00_monomerB.out	-115.599		2.63553	2.69849	2.66701		2.682	2.68	2.70387		-0.0464744	0.0164943	-0.0149901		-0.0444744	0.0184943	-0.0129901		-0.0683446	-0.00537586	-0.0368603
09_MeNH2-MeOH_1.25_dimer.out	-211.339	09_MeNH2-MeOH_1.25_cpA.out	-115.599	09_MeNH2-MeOH_1.25_cpB.out	-95.7374	09_MeNH2-MeOH_1.00_monomerA.out	-95.7373	09_MeNH2-MeOH_1.00_monomerB.out	-115.599		1.9378	1.9792	1.9585		1.971	1.97	1.98385		-0.0332013	0.00820488	-0.0124982		-0.0322013	0.00920488	-0.0114982		-0.0460524	-0.00464621	-0.0253493
09_MeNH2-MeOH_1.50_dimer.out	-211.338	09_MeNH2-MeOH_1.50_cpA.out	-115.599	09_MeNH2-MeOH_1.50_cpB.out	-95.7373	09_MeNH2-MeOH_1.00_monomerA.out	-95.7373	09_MeNH2-MeOH_1.00_monomerB.out	-115.599		1.0672	1.08844	1.07782		1.098	1.097	1.10419		-0.0307981	-0.00956109	-0.0201796		-0.0297981	-0.00856109	-0.0191796		-0.0369914	-0.0157544	-0.0263729
09_MeNH2-MeOH_2.00_dimer.out	-211.337	09_MeNH2-MeOH_2.00_cpA.out	-115.599	09_MeNH2-MeOH_2.00_cpB.out	-95.7373	09_MeNH2-MeOH_1.00_monomerA.out	-95.7373	09_MeNH2-MeOH_1.00_monomerB.out	-115.599		0.378863	0.386309	0.382586		0.393	0.394	0.39645		-0.0141366	-0.006691	-0.0104138		-0.0151366	-0.007691	-0.0114138		-0.0175871	-0.0101414	-0.0138642
10_MeNH2-MeNH2_0.90_dimer.out	-191.481	10_MeNH2-MeNH2_0.90_cpA.out	-95.7375	10_MeNH2-MeNH2_0.90_cpB.out	-95.7374	10_MeNH2-MeNH2_1.00_monomerA.out	-95.7373	10_MeNH2-MeNH2_1.00_monomerB.out	-95.7374		3.53158	3.67102	3.6013		3.722	3.671	3.72444		-0.19042	-0.0509819	-0.120701		-0.13942	1.81057e-05	-0.0697012		-0.192863	-0.0534243	-0.123144
10_MeNH2-MeNH2_0.95_dimer.out	-191.481	10_MeNH2-MeNH2_0.95_cpA.out	-95.7375	10_MeNH2-MeNH2_0.95_cpB.out	-95.7374	10_MeNH2-MeNH2_1.00_monomerA.out	-95.7373	10_MeNH2-MeNH2_1.00_monomerB.out	-95.7374		3.97276	4.09081	4.03178		4.104	4.068	4.11268		-0.131243	-0.0131877	-0.0722154		-0.0952432	0.0228123	-0.0362154		-0.139923	-0.0218677	-0.0808955
10_MeNH2-MeNH2_1.00_dimer.out	-191.481	10_MeNH2-MeNH2_1.00_cpA.out	-95.7374	10_MeNH2-MeNH2_1.00_cpB.out	-95.7374	10_MeNH2-MeNH2_1.00_monomerA.out	-95.7373	10_MeNH2-MeNH2_1.00_monomerB.out	-95.7374		4.06456	4.16471	4.11463		4.153	4.127	4.16466		-0.0884432	0.0117093	-0.0383669		-0.0624432	0.0377093	-0.0123669		-0.100107	4.57974e-05	-0.0500305
10_MeNH2-MeNH2_1.05_dimer.out	-191.481	10_MeNH2-MeNH2_1.05_cpA.out	-95.7374	10_MeNH2-MeNH2_1.05_cpB.out	-95.7374	10_MeNH2-MeNH2_1.00_monomerA.out	-95.7373	10_MeNH2-MeNH2_1.00_monomerB.out	-95.7374		3.94427	4.02958	3.98693		4.002	3.985	4.01591		-0.0577296	0.0275821	-0.0150737		-0.0407296	0.0445821	0.00192627		-0.0716393	0.0136724	-0.0289834
10_MeNH2-MeNH2_1.10_dimer.out	-191.481	10_MeNH2-MeNH2_1.10_cpA.out	-95.7374	10_MeNH2-MeNH2_1.10_cpB.out	-95.7374	10_MeNH2-MeNH2_1.00_monomerA.out	-95.7373	10_MeNH2-MeNH2_1.00_monomerB.out	-95.7374		3.70438	3.77715	3.74076		3.742	3.73	3.75635		-0.0376202	0.0351489	-0.00123566		-0.0256202	0.0471489	0.0107643		-0.0519713	0.0207977	-0.0155868
10_MeNH2-MeNH2_1.25_dimer.out	-191.479	10_MeNH2-MeNH2_1.25_cpA.out	-95.7374	10_MeNH2-MeNH2_1.25_cpB.out	-95.7374	10_MeNH2-MeNH2_1.00_monomerA.out	-95.7373	10_MeNH2-MeNH2_1.00_monomerB.out	-95.7374		2.76384	2.80948	2.78666		2.781	2.777	2.79299		-0.0171585	0.0284801	0.00566081		-0.0131585	0.0324801	0.00966081		-0.0291461	0.0164925	-0.00632681
10_MeNH2-MeNH2_1.50_dimer.out	-191.477	10_MeNH2-MeNH2_1.50_cpA.out	-95.7374	10_MeNH2-MeNH2_1.50_cpB.out	-95.7373	10_MeNH2-MeNH2_1.00_monomerA.out	-95.7373	10_MeNH2-MeNH2_1.00_monomerB.out	-95.7374		1.27653	1.29535	1.28594		1.302	1.302	1.30885		-0.0254694	-0.00664755	-0.0160585		-0.0254694	-0.00664755	-0.0160585		-0.032322	-0.0135001	-0.0229111
10_MeNH2-MeNH2_2.00_dimer.out	-191.475	10_MeNH2-MeNH2_2.00_cpA.out	-95.7374	10_MeNH2-MeNH2_2.00_cpB.out	-95.7373	10_MeNH2-MeNH2_1.00_monomerA.out	-95.7373	10_MeNH2-MeNH2_1.00_monomerB.out	-95.7374		0.377987	0.383425	0.380706		0.385	0.388	0.38974		-0.00701313	-0.00157528	-0.00429421		-0.0100131	-0.00457528	-0.00729421		-0.0117534	-0.00631555	-0.00903447
11_MeNH2-Peptide_0.90_dimer.out	-343.974	11_MeNH2-Peptide_0.90_cpA.out	-248.229	11_MeNH2-Peptide_0.90_cpB.out	-95.7374	11_MeNH2-Peptide_1.00_monomerA.out	-95.7373	11_MeNH2-Peptide_1.00_monomerB.out	-248.229		4.589	4.79174	4.69037		4.958	4.922	5.00913		-0.369	-0.166255	-0.267628		-0.333	-0.130255	-0.231628		-0.420134	-0.217389	-0.318761
11_MeNH2-Peptide_0.95_dimer.out	-343.975	11_MeNH2-Peptide_0.95_cpA.out	-248.229	11_MeNH2-Peptide_0.95_cpB.out	-95.7374	11_MeNH2-Peptide_1.00_monomerA.out	-95.7373	11_MeNH2-Peptide_1.00_monomerB.out	-248.229		5.06596	5.24152	5.15374		5.354	5.334	5.40909		-0.288037	-0.11248	-0.200259		-0.268037	-0.0924801	-0.180259		-0.34313	-0.167573	-0.255352
11_MeNH2-Peptide_1.00_dimer.out	-343.975	11_MeNH2-Peptide_1.00_cpA.out	-248.229	11_MeNH2-Peptide_1.00_cpB.out	-95.7374	11_MeNH2-Peptide_1.00_monomerA.out	-95.7373	11_MeNH2-Peptide_1.00_monomerB.out	-248.229		5.17344	5.32538	5.24941		5.397	5.387	5.45281		-0.223563	-0.0716172	-0.14759		-0.213563	-0.0616172	-0.13759		-0.279378	-0.127432	-0.203405
11_MeNH2-Peptide_1.05_dimer.out	-343.975	11_MeNH2-Peptide_1.05_cpA.out	-248.229	11_MeNH2-Peptide_1.05_cpB.out	-95.7374	11_MeNH2-Peptide_1.00_monomerA.out	-95.7373	11_MeNH2-Peptide_1.00_monomerB.out	-248.229		5.04907	5.18062	5.11484		5.222	5.221	5.27745		-0.172934	-0.0413843	-0.107159		-0.171934	-0.0403843	-0.106159		-0.228384	-0.0968341	-0.162609
11_MeNH2-Peptide_1.10_dimer.out	-343.974	11_MeNH2-Peptide_1.10_cpA.out	-248.229	11_MeNH2-Peptide_1.10_cpB.out	-95.7374	11_MeNH2-Peptide_1.00_monomerA.out	-95.7373	11_MeNH2-Peptide_1.00_monomerB.out	-248.229		4.7873	4.90202	4.84466		4.923	4.926	4.97585		-0.135704	-0.020983	-0.0783435		-0.138704	-0.023983	-0.0813435		-0.188557	-0.073836	-0.131197
11_MeNH2-Peptide_1.25_dimer.out	-343.971	11_MeNH2-Peptide_1.25_cpA.out	-248.229	11_MeNH2-Peptide_1.25_cpB.out	-95.7373	11_MeNH2-Peptide_1.00_monomerA.out	-95.7373	11_MeNH2-Peptide_1.00_monomerB.out	-248.229		3.13126	3.19419	3.16273		3.197	3.204	3.2298		-0.0657357	-0.00281397	-0.0342748		-0.0727357	-0.00981397	-0.0412748		-0.0985327	-0.0356109	-0.0670718
11_MeNH2-Peptide_1.50_dimer.out	-343.969	11_MeNH2-Peptide_1.50_cpA.out	-248.229	11_MeNH2-Peptide_1.50_cpB.out	-95.7373	11_MeNH2-Peptide_1.00_monomerA.out	-95.7373	11_MeNH2-Peptide_1.00_monomerB.out	-248.229		1.35123	1.3761	1.36367		1.397	1.402	1.41274		-0.045772	-0.0208956	-0.0333338		-0.050772	-0.0258956	-0.0383338		-0.061508	-0.0366315	-0.0490697
11_MeNH2-Peptide_2.00_dimer.out	-343.967	11_MeNH2-Peptide_2.00_cpA.out	-248.229	11_MeNH2-Peptide_2.00_cpB.out	-95.7373	11_MeNH2-Peptide_1.00_monomerA.out	-95.7373	11_MeNH2-Peptide_1.00_monomerB.out	-248.229		0.450089	0.457579	0.453834		0.455	0.457	0.460212		-0.00491107	0.00257934	-0.00116587		-0.00691107	0.000579336	-0.00316587		-0.0101235	-0.0026331	-0.0063783
12_MeNH2-Water_0.90_dimer.out	-172.111	12_MeNH2-Water_0.90_cpA.out	-76.3631	12_MeNH2-Water_0.90_cpB.out	-95.7375	12_MeNH2-Water_1.00_monomerA.out	-95.7374	12_MeNH2-Water_1.00_monomerB.out	-76.363		6.74703	6.93004	6.83854		6.861	6.777	6.83393		-0.113972	0.0690441	-0.022464		-0.0299721	0.153044	0.061536		-0.0869037	0.0961125	0.00460436
12_MeNH2-Water_0.95_dimer.out	-172.112	12_MeNH2-Water_0.95_cpA.out	-76.3631	12_MeNH2-Water_0.95_cpB.out	-95.7375	12_MeNH2-Water_1.00_monomerA.out	-95.7374	12_MeNH2-Water_1.00_monomerB.out	-76.363		7.21644	7.37213	7.29428		7.291	7.224	7.27212		-0.0745583	0.0811274	0.00328452		-0.00755834	0.148127	0.0702845		-0.0556818	0.100004	0.0221611
12_MeNH2-Water_1.00_dimer.out	-172.112	12_MeNH2-Water_1.00_cpA.out	-76.3631	12_MeNH2-Water_1.00_cpB.out	-95.7375	12_MeNH2-Water_1.00_monomerA.out	-95.7374	12_MeNH2-Water_1.00_monomerB.out	-76.363		7.26818	7.40117	7.33468		7.312	7.259	7.29992		-0.0438183	0.089172	0.0226769		0.00918168	0.142172	0.0756769		-0.0317415	0.101249	0.0347537
12_MeNH2-Water_1.05_dimer.out	-172.112	12_MeNH2-Water_1.05_cpA.out	-76.3631	12_MeNH2-Water_1.05_cpB.out	-95.7375	12_MeNH2-Water_1.00_monomerA.out	-95.7374	12_MeNH2-Water_1.00_monomerB.out	-76.363		7.05608	7.17014	7.11311		7.077	7.036	7.07008		-0.0209224	0.0931414	0.0361095		0.0200776	0.134141	0.0771095		-0.0140021	0.100062	0.0430298
12_MeNH2-Water_1.10_dimer.out	-172.111	12_MeNH2-Water_1.10_cpA.out	-76.363	12_MeNH2-Water_1.10_cpB.out	-95.7374	12_MeNH2-Water_1.00_monomerA.out	-95.7374	12_MeNH2-Water_1.00_monomerB.out	-76.363		6.68659	6.78505	6.73582		6.691	6.659	6.68838		-0.0044063	0.0940548	0.0448243		0.0275937	0.126055	0.0768243		-0.00178212	0.096679	0.0474484
12_MeNH2-Water_1.25_dimer.out	-172.109	12_MeNH2-Water_1.25_cpA.out	-76.363	12_MeNH2-Water_1.25_cpB.out	-95.7374	12_MeNH2-Water_1.00_monomerA.out	-95.7374	12_MeNH2-Water_1.00_monomerB.out	-76.363		5.24356	5.30867	5.27612		5.231	5.217	5.23424		0.0125626	0.0776718	0.0451172		0.0265626	0.0916718	0.0591172		0.00931997	0.0744291	0.0418745
12_MeNH2-Water_1.50_dimer.out	-172.105	12_MeNH2-Water_1.50_cpA.out	-76.363	12_MeNH2-Water_1.50_cpB.out	-95.7374	12_MeNH2-Water_1.00_monomerA.out	-95.7374	12_MeNH2-Water_1.00_monomerB.out	-76.363		3.14818	3.18244	3.16531		3.155	3.149	3.15783		-0.0068237	0.0274381	0.0103072		-0.000823696	0.0334381	0.0163072		-0.0096513	0.0246105	0.00747961
12_MeNH2-Water_2.00_dimer.out	-172.102	12_MeNH2-Water_2.00_cpA.out	-76.363	12_MeNH2-Water_2.00_cpB.out	-95.7374	12_MeNH2-Water_1.00_monomerA.out	-95.7374	12_MeNH2-Water_1.00_monomerB.out	-76.363		1.16564	1.17678	1.17121		1.196	1.195	1.19853		-0.0303631	-0.0192191	-0.0247911		-0.0293631	-0.0182191	-0.0237911		-0.0328963	-0.0217523	-0.0273243
13_Peptide-MeOH_0.90_dimer.out	-363.837	13_Peptide-MeOH_0.90_cpA.out	-115.599	13_Peptide-MeOH_0.90_cpB.out	-248.229	13_Peptide-MeOH_1.00_monomerA.out	-248.229	13_Peptide-MeOH_1.00_monomerB.out	-115.599		5.42412	5.62917	5.52664		5.753	5.725	5.81102		-0.328881	-0.123831	-0.226356		-0.300881	-0.0958314	-0.198356		-0.386905	-0.181855	-0.28438
13_Peptide-MeOH_0.95_dimer.out	-363.837	13_Peptide-MeOH_0.95_cpA.out	-115.599	13_Peptide-MeOH_0.95_cpB.out	-248.229	13_Peptide-MeOH_1.00_monomerA.out	-248.229	13_Peptide-MeOH_1.00_monomerB.out	-115.599		5.89777	6.07436	5.98607		6.165	6.149	6.22383		-0.267231	-0.0906365	-0.178934		-0.251231	-0.0746365	-0.162934		-0.326058	-0.149463	-0.23776
13_Peptide-MeOH_1.00_dimer.out	-363.838	13_Peptide-MeOH_1.00_cpA.out	-115.599	13_Peptide-MeOH_1.00_cpB.out	-248.229	13_Peptide-MeOH_1.00_monomerA.out	-248.229	13_Peptide-MeOH_1.00_monomerB.out	-115.599		6.00383	6.15726	6.08055		6.22	6.213	6.27817		-0.21617	-0.0627368	-0.139453		-0.20917	-0.0557368	-0.132453		-0.274339	-0.120906	-0.197623
13_Peptide-MeOH_1.05_dimer.out	-363.837	13_Peptide-MeOH_1.05_cpA.out	-115.599	13_Peptide-MeOH_1.05_cpB.out	-248.229	13_Peptide-MeOH_1.00_monomerA.out	-248.229	13_Peptide-MeOH_1.00_monomerB.out	-115.599		5.87894	6.01328	5.94611		6.054	6.053	6.1095		-0.175055	-0.040716	-0.107886		-0.174055	-0.039716	-0.106886		-0.23055	-0.0962111	-0.163381
13_Peptide-MeOH_1.10_dimer.out	-363.837	13_Peptide-MeOH_1.10_cpA.out	-115.599	13_Peptide-MeOH_1.10_cpB.out	-248.229	13_Peptide-MeOH_1.00_monomerA.out	-248.229	13_Peptide-MeOH_1.00_monomerB.out	-115.599		5.61588	5.73345	5.67467		5.759	5.762	5.81023		-0.143115	-0.0255507	-0.0843329		-0.146115	-0.0285507	-0.0873329		-0.194342	-0.0767774	-0.13556
13_Peptide-MeOH_1.25_dimer.out	-363.835	13_Peptide-MeOH_1.25_cpA.out	-115.599	13_Peptide-MeOH_1.25_cpB.out	-248.229	13_Peptide-MeOH_1.00_monomerA.out	-248.229	13_Peptide-MeOH_1.00_monomerB.out	-115.599		4.52353	4.60233	4.56293		4.608	4.615	4.6463		-0.0844732	-0.0056681	-0.0450706		-0.0914732	-0.0126681	-0.0520706		-0.122778	-0.0439727	-0.0833752
13_Peptide-MeOH_1.50_dimer.out	-363.832	13_Peptide-MeOH_1.50_cpA.out	-115.599	13_Peptide-MeOH_1.50_cpB.out	-248.229	13_Peptide-MeOH_1.00_monomerA.out	-248.229	13_Peptide-MeOH_1.00_monomerB.out	-115.599		2.89111	2.93324	2.91218		2.948	2.952	2.96981		-0.0568866	-0.0147599	-0.0358233		-0.0608866	-0.0187599	-0.0398233		-0.0786951	-0.0365684	-0.0576317
13_Peptide-MeOH_2.00_dimer.out	-363.83	13_Peptide-MeOH_2.00_cpA.out	-115.599	13_Peptide-MeOH_2.00_cpB.out	-248.229	13_Peptide-MeOH_1.00_monomerA.out	-248.229	13_Peptide-MeOH_1.00_monomerB.out	-115.599		1.27814	1.29265	1.2854		1.307	1.308	1.31493		-0.028858	-0.0143479	-0.0216029		-0.029858	-0.0153479	-0.0226029		-0.0367834	-0.0222733	-0.0295283
14_Peptide-MeNH2_0.90_dimer.out	-343.977	14_Peptide-MeNH2_0.90_cpA.out	-95.7376	14_Peptide-MeNH2_0.90_cpB.out	-248.229	14_Peptide-MeNH2_1.00_monomerA.out	-248.229	14_Peptide-MeNH2_1.00_monomerB.out	-95.7374		6.66711	6.87952	6.77331		6.907	6.86	6.93822		-0.239895	-0.0274764	-0.133686		-0.192895	0.0195236	-0.0866857		-0.27111	-0.0586917	-0.164901
14_Peptide-MeNH2_0.95_dimer.out	-343.978	14_Peptide-MeNH2_0.95_cpA.out	-95.7375	14_Peptide-MeNH2_0.95_cpB.out	-248.229	14_Peptide-MeNH2_1.00_monomerA.out	-248.229	14_Peptide-MeNH2_1.00_monomerB.out	-95.7374		7.22078	7.40356	7.31217		7.411	7.379	7.44608		-0.190219	-0.00744254	-0.0988306		-0.158219	0.0245575	-0.0668306		-0.225299	-0.0425226	-0.133911
14_Peptide-MeNH2_1.00_dimer.out	-343.978	14_Peptide-MeNH2_1.00_cpA.out	-95.7375	14_Peptide-MeNH2_1.00_cpB.out	-248.229	14_Peptide-MeNH2_1.00_monomerA.out	-248.229	14_Peptide-MeNH2_1.00_monomerB.out	-95.7374		7.34962	7.50746	7.42854		7.5	7.478	7.53646		-0.150378	0.00746399	-0.0714572		-0.128378	0.029464	-0.0494572		-0.186835	-0.0289921	-0.107913
14_Peptide-MeNH2_1.05_dimer.out	-343.978	14_Peptide-MeNH2_1.05_cpA.out	-95.7375	14_Peptide-MeNH2_1.05_cpB.out	-248.229	14_Peptide-MeNH2_1.00_monomerA.out	-248.229	14_Peptide-MeNH2_1.00_monomerB.out	-95.7374		7.20593	7.34309	7.27451		7.324	7.31	7.35958		-0.118067	0.0190942	-0.0494862		-0.104067	0.0330942	-0.0354862		-0.15365	-0.0164895	-0.0850699
14_Peptide-MeNH2_1.10_dimer.out	-343.977	14_Peptide-MeNH2_1.10_cpA.out	-95.7375	14_Peptide-MeNH2_1.10_cpB.out	-248.229	14_Peptide-MeNH2_1.00_monomerA.out	-248.229	14_Peptide-MeNH2_1.00_monomerB.out	-95.7374		6.89319	7.01331	6.95325		6.986	6.978	7.0205		-0.0928051	0.0273053	-0.0327499		-0.0848051	0.0353053	-0.0247499		-0.127305	-0.00719498	-0.0672502
14_Peptide-MeNH2_1.25_dimer.out	-343.975	14_Peptide-MeNH2_1.25_cpA.out	-95.7374	14_Peptide-MeNH2_1.25_cpB.out	-248.229	14_Peptide-MeNH2_1.00_monomerA.out	-248.229	14_Peptide-MeNH2_1.00_monomerB.out	-95.7374		5.55986	5.643	5.60143		5.61	5.611	5.63893		-0.0501422	0.033002	-0.00857008		-0.0511422	0.032002	-0.00957008		-0.0790747	0.00406947	-0.0375026
14_Peptide-MeNH2_1.50_dimer.out	-343.972	14_Peptide-MeNH2_1.50_cpA.out	-95.7374	14_Peptide-MeNH2_1.50_cpB.out	-248.229	14_Peptide-MeNH2_1.00_monomerA.out	-248.229	14_Peptide-MeNH2_1.00_monomerB.out	-95.7374		3.51269	3.55865	3.53567		3.549	3.552	3.56734		-0.0363092	0.00965025	-0.0133295		-0.0393092	0.00665025	-0.0163295		-0.0546449	-0.0086855	-0.0316652
14_Peptide-MeNH2_2.00_dimer.out	-343.969	14_Peptide-MeNH2_2.00_cpA.out	-95.7374	14_Peptide-MeNH2_2.00_cpB.out	-248.229	14_Peptide-MeNH2_1.00_monomerA.out	-248.229	14_Peptide-MeNH2_1.00_monomerB.out	-95.7374		1.46453	1.48185	1.47319		1.488	1.492	1.49832		-0.0234672	-0.00614729	-0.0148072		-0.0274672	-0.0101473	-0.0188072		-0.0337902	-0.0164704	-0.0251303
15_Peptide-Peptide_0.90_dimer.out	-496.47	15_Peptide-Peptide_0.90_cpA.out	-248.229	15_Peptide-Peptide_0.90_cpB.out	-248.229	15_Peptide-Peptide_1.00_monomerA.out	-248.229	15_Peptide-Peptide_1.00_monomerB.out	-248.229		7.67867	7.94576	7.81222		8.096	8.085	8.20422		-0.417326	-0.150243	-0.283784		-0.406326	-0.139243	-0.272784		-0.52555	-0.258467	-0.392008
15_Peptide-Peptide_0.95_dimer.out	-496.471	15_Peptide-Peptide_0.95_cpA.out	-248.229	15_Peptide-Peptide_0.95_cpB.out	-248.229	15_Peptide-Peptide_1.00_monomerA.out	-248.229	15_Peptide-Peptide_1.00_monomerB.out	-248.229		8.2382	8.47176	8.35498		8.586	8.59	8.69565		-0.347798	-0.114243	-0.23102		-0.351798	-0.118243	-0.23502		-0.457444	-0.223889	-0.340667
15_Peptide-Peptide_1.00_dimer.out	-496.471	15_Peptide-Peptide_1.00_cpA.out	-248.229	15_Peptide-Peptide_1.00_cpB.out	-248.229	15_Peptide-Peptide_1.00_monomerA.out	-248.229	15_Peptide-Peptide_1.00_monomerB.out	-248.229		8.37034	8.57502	8.47268		8.659	8.673	8.76729		-0.288661	-0.0839826	-0.186322		-0.302661	-0.0979826	-0.200322		-0.396951	-0.192272	-0.294611
15_Peptide-Peptide_1.05_dimer.out	-496.471	15_Peptide-Peptide_1.05_cpA.out	-248.229	15_Peptide-Peptide_1.05_cpB.out	-248.229	15_Peptide-Peptide_1.00_monomerA.out	-248.229	15_Peptide-Peptide_1.00_monomerB.out	-248.229		8.22487	8.40479	8.31483		8.464	8.485	8.56864		-0.239126	-0.0592079	-0.149167		-0.260126	-0.0802079	-0.170167		-0.343767	-0.163849	-0.253808
15_Peptide-Peptide_1.10_dimer.out	-496.47	15_Peptide-Peptide_1.10_cpA.out	-248.229	15_Peptide-Peptide_1.10_cpB.out	-248.229	15_Peptide-Peptide_1.00_monomerA.out	-248.229	15_Peptide-Peptide_1.00_monomerB.out	-248.229		7.90682	8.06517	7.98599		8.105	8.131	8.20436		-0.198183	-0.0398285	-0.119006		-0.224183	-0.0658285	-0.145006		-0.297543	-0.139188	-0.218365
15_Peptide-Peptide_1.25_dimer.out	-496.468	15_Peptide-Peptide_1.25_cpA.out	-248.229	15_Peptide-Peptide_1.25_cpB.out	-248.229	15_Peptide-Peptide_1.00_monomerA.out	-248.229	15_Peptide-Peptide_1.00_monomerB.out	-248.229		6.53097	6.64102	6.58599		6.649	6.677	6.72825		-0.118031	-0.00797991	-0.0630053		-0.146031	-0.0359799	-0.0910053		-0.197283	-0.0872321	-0.142258
15_Peptide-Peptide_1.50_dimer.out	-496.465	15_Peptide-Peptide_1.50_cpA.out	-248.229	15_Peptide-Peptide_1.50_cpB.out	-248.229	15_Peptide-Peptide_1.00_monomerA.out	-248.229	15_Peptide-Peptide_1.00_monomerB.out	-248.229		4.33899	4.40437	4.37168		4.407	4.426	4.45655		-0.0680084	-0.00262996	-0.0353192		-0.0870084	-0.02163	-0.0543192		-0.117562	-0.0521836	-0.0848728
15_Peptide-Peptide_2.00_dimer.out	-496.46	15_Peptide-Peptide_2.00_cpA.out	-248.229	15_Peptide-Peptide_2.00_cpB.out	-248.229	15_Peptide-Peptide_1.00_monomerA.out	-248.229	15_Peptide-Peptide_1.00_monomerB.out	-248.229		1.74514	1.76649	1.75581		1.775	1.782	1.7925		-0.0298617	-0.008509	-0.0191854		-0.0368617	-0.015509	-0.0261854		-0.0473618	-0.026009	-0.0366854
16_Peptide-Water_0.90_dimer.out	-324.6	16_Peptide-Water_0.90_cpA.out	-76.3633	16_Peptide-Water_0.90_cpB.out	-248.229	16_Peptide-Water_1.00_monomerA.out	-248.229	16_Peptide-Water_1.00_monomerB.out	-76.3631		4.53227	4.69058	4.61143		4.761	4.74	4.80144		-0.228727	-0.0704189	-0.149573		-0.207727	-0.0494189	-0.128573		-0.269164	-0.110857	-0.190011
16_Peptide-Water_0.95_dimer.out	-324.6	16_Peptide-Water_0.95_cpA.out	-76.3633	16_Peptide-Water_0.95_cpB.out	-248.229	16_Peptide-Water_1.00_monomerA.out	-248.229	16_Peptide-Water_1.00_monomerB.out	-76.3631		4.9211	5.05839	4.98974		5.108	5.097	5.15		-0.186897	-0.0496145	-0.118256		-0.175897	-0.0386145	-0.107256		-0.228894	-0.0916109	-0.160252
16_Peptide-Water_1.00_dimer.out	-324.6	16_Peptide-Water_1.00_cpA.out	-76.3632	16_Peptide-Water_1.00_cpB.out	-248.229	16_Peptide-Water_1.00_monomerA.out	-248.229	16_Peptide-Water_1.00_monomerB.out	-76.3631		4.99621	5.11609	5.05615		5.15	5.146	5.19092		-0.153787	-0.0339089	-0.0938479		-0.149787	-0.0299089	-0.0898479		-0.19471	-0.0748315	-0.134771
16_Peptide-Water_1.05_dimer.out	-324.6	16_Peptide-Water_1.05_cpA.out	-76.3632	16_Peptide-Water_1.05_cpB.out	-248.229	16_Peptide-Water_1.00_monomerA.out	-248.229	16_Peptide-Water_1.00_monomerB.out	-76.3631		4.87821	4.98328	4.93075		5.005	5.006	5.04427		-0.126785	-0.021717	-0.0742512		-0.127785	-0.022717	-0.0752512		-0.16606	-0.0609913	-0.113526
16_Peptide-Water_1.10_dimer.out	-324.6	16_Peptide-Water_1.10_cpA.out	-76.3632	16_Peptide-Water_1.10_cpB.out	-248.229	16_Peptide-Water_1.00_monomerA.out	-248.229	16_Peptide-Water_1.00_monomerB.out	-76.3631		4.64748	4.73992	4.6937		4.754	4.758	4.79049		-0.106523	-0.0140759	-0.0602993		-0.110523	-0.0180759	-0.0642993		-0.143015	-0.0505685	-0.0967918
16_Peptide-Water_1.25_dimer.out	-324.598	16_Peptide-Water_1.25_cpA.out	-76.3632	16_Peptide-Water_1.25_cpB.out	-248.229	16_Peptide-Water_1.00_monomerA.out	-248.229	16_Peptide-Water_1.00_monomerB.out	-76.3631		3.72532	3.79051	3.75792		3.799	3.805	3.82538		-0.0736823	-0.00848534	-0.0410838		-0.0796823	-0.0144853	-0.0470838		-0.100067	-0.0348698	-0.0674683
16_Peptide-Water_1.50_dimer.out	-324.596	16_Peptide-Water_1.50_cpA.out	-76.3632	16_Peptide-Water_1.50_cpB.out	-248.229	16_Peptide-Water_1.00_monomerA.out	-248.229	16_Peptide-Water_1.00_monomerB.out	-76.3631		2.39156	2.43129	2.41142		2.454	2.458	2.46807		-0.0624433	-0.0227133	-0.0425783		-0.0664433	-0.0267133	-0.0465783		-0.0765173	-0.0367873	-0.0566523
16_Peptide-Water_2.00_dimer.out	-324.594	16_Peptide-Water_2.00_cpA.out	-76.3631	16_Peptide-Water_2.00_cpB.out	-248.229	16_Peptide-Water_1.00_monomerA.out	-248.229	16_Peptide-Water_1.00_monomerB.out	-76.3631		1.09127	1.10942	1.10035		1.137	1.136	1.13891		-0.045725	-0.027576	-0.0366505		-0.044725	-0.026576	-0.0356505		-0.0476319	-0.0294829	-0.0385574
17_Uracil-Uracil_BP_0.90_dimer.out	-828.731	17_Uracil-Uracil_BP_0.90_cpA.out	-414.353	17_Uracil-Uracil_BP_0.90_cpB.out	-414.353	17_Uracil-Uracil_BP_1.00_monomerA.out	-414.353	17_Uracil-Uracil_BP_1.00_monomerB.out	-414.353		15.3612	15.8259	15.5936		16.066	16.042	16.2292		-0.704766	-0.240121	-0.472443		-0.680766	-0.216121	-0.448443		-0.86793	-0.403285	-0.635608
17_Uracil-Uracil_BP_0.95_dimer.out	-828.733	17_Uracil-Uracil_BP_0.95_cpA.out	-414.353	17_Uracil-Uracil_BP_0.95_cpB.out	-414.353	17_Uracil-Uracil_BP_1.00_monomerA.out	-414.353	17_Uracil-Uracil_BP_1.00_monomerB.out	-414.353		16.6036	17.0063	16.8049		17.187	17.19	17.3585		-0.583449	-0.180704	-0.382077		-0.586449	-0.183704	-0.385077		-0.754923	-0.352178	-0.553551
17_Uracil-Uracil_BP_1.00_dimer.out	-828.734	17_Uracil-Uracil_BP_1.00_cpA.out	-414.353	17_Uracil-Uracil_BP_1.00_cpB.out	-414.353	17_Uracil-Uracil_BP_1.00_monomerA.out	-414.353	17_Uracil-Uracil_BP_1.00_monomerB.out	-414.353		16.9286	17.2808	17.1047		17.405	17.432	17.583		-0.476425	-0.124238	-0.300331		-0.503425	-0.151238	-0.327331		-0.654468	-0.302281	-0.478374
17_Uracil-Uracil_BP_1.05_dimer.out	-828.733	17_Uracil-Uracil_BP_1.05_cpA.out	-414.353	17_Uracil-Uracil_BP_1.05_cpB.out	-414.353	17_Uracil-Uracil_BP_1.00_monomerA.out	-414.353	17_Uracil-Uracil_BP_1.00_monomerB.out	-414.353		16.65	16.9582	16.8041		17.034	17.078	17.2136		-0.383958	-0.075799	-0.229878		-0.427958	-0.119799	-0.273878		-0.563538	-0.255379	-0.409459
17_Uracil-Uracil_BP_1.10_dimer.out	-828.732	17_Uracil-Uracil_BP_1.10_cpA.out	-414.353	17_Uracil-Uracil_BP_1.10_cpB.out	-414.353	17_Uracil-Uracil_BP_1.00_monomerA.out	-414.353	17_Uracil-Uracil_BP_1.00_monomerB.out	-414.353		15.99	16.2614	16.1257		16.293	16.352	16.4732		-0.302995	-0.0315661	-0.16728		-0.361995	-0.0905661	-0.22628		-0.483176	-0.211747	-0.347462
17_Uracil-Uracil_BP_1.25_dimer.out	-828.727	17_Uracil-Uracil_BP_1.25_cpA.out	-414.353	17_Uracil-Uracil_BP_1.25_cpB.out	-414.353	17_Uracil-Uracil_BP_1.00_monomerA.out	-414.353	17_Uracil-Uracil_BP_1.00_monomerB.out	-414.353		13.055	13.2423	13.1487		13.19	13.263	13.3496		-0.134954	0.0522858	-0.0413341		-0.207954	-0.0207142	-0.114334		-0.294569	-0.107329	-0.200949
17_Uracil-Uracil_BP_1.50_dimer.out	-828.719	17_Uracil-Uracil_BP_1.50_cpA.out	-414.353	17_Uracil-Uracil_BP_1.50_cpB.out	-414.353	17_Uracil-Uracil_BP_1.00_monomerA.out	-414.353	17_Uracil-Uracil_BP_1.00_monomerB.out	-414.353		8.33422	8.44548	8.38985		8.357	8.41	8.46175		-0.0227787	0.088477	0.0328492		-0.0757787	0.035477	-0.0201508		-0.127525	-0.0162693	-0.0718972
17_Uracil-Uracil_BP_2.00_dimer.out	-828.711	17_Uracil-Uracil_BP_2.00_cpA.out	-414.353	17_Uracil-Uracil_BP_2.00_cpB.out	-414.353	17_Uracil-Uracil_BP_1.00_monomerA.out	-414.353	17_Uracil-Uracil_BP_1.00_monomerB.out	-414.353		3.34134	3.38623	3.36379		3.337	3.357	3.38004		0.00433997	0.0492304	0.0267852		-0.01566	0.0292304	0.0067852		-0.0386984	0.00619201	-0.0162532
18_Water-Pyridine_0.90_dimer.out	-324.317	18_Water-Pyridine_0.90_cpA.out	-247.943	18_Water-Pyridine_0.90_cpB.out	-76.3632	18_Water-Pyridine_1.00_monomerA.out	-76.363	18_Water-Pyridine_1.00_monomerB.out	-247.943		6.53928	6.7495	6.64439		6.484	6.453	6.52673		0.0552757	0.265503	0.160389		0.0862757	0.296503	0.191389		0.0125454	0.222773	0.117659
18_Water-Pyridine_0.95_dimer.out	-324.317	18_Water-Pyridine_0.95_cpA.out	-247.943	18_Water-Pyridine_0.95_cpB.out	-76.3631	18_Water-Pyridine_1.00_monomerA.out	-76.363	18_Water-Pyridine_1.00_monomerB.out	-247.943		6.93541	7.11682	7.02611		6.87	6.853	6.91751		0.0654112	0.246818	0.156115		0.0824112	0.263818	0.173115		0.0179059	0.199313	0.108609
18_Water-Pyridine_1.00_dimer.out	-324.317	18_Water-Pyridine_1.00_cpA.out	-247.943	18_Water-Pyridine_1.00_cpB.out	-76.3631	18_Water-Pyridine_1.00_monomerA.out	-76.363	18_Water-Pyridine_1.00_monomerB.out	-247.943		6.9507	7.10751	7.02911		6.879	6.872	6.92808		0.0717036	0.228508	0.150106		0.0787036	0.235508	0.157106		0.0226274	0.179431	0.101029
18_Water-Pyridine_1.05_dimer.out	-324.317	18_Water-Pyridine_1.05_cpA.out	-247.943	18_Water-Pyridine_1.05_cpB.out	-76.3631	18_Water-Pyridine_1.00_monomerA.out	-76.363	18_Water-Pyridine_1.00_monomerB.out	-247.943		6.72742	6.8636	6.79551		6.653	6.653	6.70133		0.0744194	0.210603	0.142511		0.0744194	0.210603	0.142511		0.0260931	0.162277	0.094185
18_Water-Pyridine_1.10_dimer.out	-324.316	18_Water-Pyridine_1.10_cpA.out	-247.943	18_Water-Pyridine_1.10_cpB.out	-76.3631	18_Water-Pyridine_1.00_monomerA.out	-76.363	18_Water-Pyridine_1.00_monomerB.out	-247.943		6.36389	6.48283	6.42336		6.289	6.294	6.33583		0.074891	0.19383	0.13436		0.069891	0.18883	0.12936		0.0280644	0.147003	0.0875337
18_Water-Pyridine_1.25_dimer.out	-324.314	18_Water-Pyridine_1.25_cpA.out	-247.943	18_Water-Pyridine_1.25_cpB.out	-76.3631	18_Water-Pyridine_1.00_monomerA.out	-76.363	18_Water-Pyridine_1.00_monomerB.out	-247.943		4.9898	5.07161	5.0307		4.929	4.939	4.96488		0.0607982	0.142605	0.101702		0.0507982	0.132605	0.0917018		0.0249145	0.106722	0.0658181
18_Water-Pyridine_1.50_dimer.out	-324.311	18_Water-Pyridine_1.50_cpA.out	-247.943	18_Water-Pyridine_1.50_cpB.out	-76.363	18_Water-Pyridine_1.00_monomerA.out	-76.363	18_Water-Pyridine_1.00_monomerB.out	-247.943		3.02883	3.07695	3.05289		3.006	3.013	3.02649		0.0228348	0.0709515	0.0468931		0.0158348	0.0639515	0.0398931		0.00234959	0.0504663	0.0264079
18_Water-Pyridine_2.00_dimer.out	-324.308	18_Water-Pyridine_2.00_cpA.out	-247.943	18_Water-Pyridine_2.00_cpB.out	-76.363	18_Water-Pyridine_1.00_monomerA.out	-76.363	18_Water-Pyridine_1.00_monomerB.out	-247.943		1.17158	1.19061	1.1811		1.184	1.189	1.19491		-0.0124152	0.00661234	-0.00290143		-0.0174152	0.00161234	-0.00790143		-0.0233225	-0.00429496	-0.0138087
19_MeOH-Pyridine_0.90_dimer.out	-363.552	19_MeOH-Pyridine_0.90_cpA.out	-247.943	19_MeOH-Pyridine_0.90_cpB.out	-115.598	19_MeOH-Pyridine_1.00_monomerA.out	-115.598	19_MeOH-Pyridine_1.00_monomerB.out	-247.943		6.88234	7.11636	6.99935		6.876	6.855	6.94443		0.00634492	0.240357	0.123351		0.0273449	0.261357	0.144351		-0.0620847	0.171927	0.0549211
19_MeOH-Pyridine_0.95_dimer.out	-363.553	19_MeOH-Pyridine_0.95_cpA.out	-247.943	19_MeOH-Pyridine_0.95_cpB.out	-115.598	19_MeOH-Pyridine_1.00_monomerA.out	-115.598	19_MeOH-Pyridine_1.00_monomerB.out	-247.943		7.4013	7.60325	7.50227		7.374	7.366	7.44547		0.0272972	0.22925	0.128273		0.0352972	0.23725	0.136273		-0.0441726	0.15778	0.0568036
19_MeOH-Pyridine_1.00_dimer.out	-363.553	19_MeOH-Pyridine_1.00_cpA.out	-247.943	19_MeOH-Pyridine_1.00_cpB.out	-115.598	19_MeOH-Pyridine_1.00_monomerA.out	-115.598	19_MeOH-Pyridine_1.00_monomerB.out	-247.943		7.49201	7.66712	7.57957		7.448	7.451	7.52025		0.0440144	0.21912	0.131567		0.0410144	0.21612	0.128567		-0.0282364	0.146869	0.0593163
19_MeOH-Pyridine_1.05_dimer.out	-363.553	19_MeOH-Pyridine_1.05_cpA.out	-247.943	19_MeOH-Pyridine_1.05_cpB.out	-115.598	19_MeOH-Pyridine_1.00_monomerA.out	-115.598	19_MeOH-Pyridine_1.00_monomerB.out	-247.943		7.30928	7.46166	7.38547		7.253	7.263	7.32365		0.0562829	0.208657	0.13247		0.0462829	0.198657	0.12247		-0.0143669	0.138007	0.06182
19_MeOH-Pyridine_1.10_dimer.out	-363.552	19_MeOH-Pyridine_1.10_cpA.out	-247.943	19_MeOH-Pyridine_1.10_cpB.out	-115.598	19_MeOH-Pyridine_1.00_monomerA.out	-115.598	19_MeOH-Pyridine_1.00_monomerB.out	-247.943		6.9608	7.09394	7.02737		6.897	6.911	6.96348		0.0637956	0.196939	0.130367		0.0497956	0.182939	0.116367		-0.00268203	0.130461	0.0638895
19_MeOH-Pyridine_1.25_dimer.out	-363.55	19_MeOH-Pyridine_1.25_cpA.out	-247.943	19_MeOH-Pyridine_1.25_cpB.out	-115.598	19_MeOH-Pyridine_1.00_monomerA.out	-115.598	19_MeOH-Pyridine_1.00_monomerB.out	-247.943		5.54282	5.6338	5.58831		5.473	5.49	5.52459		0.0698154	0.160796	0.115306		0.0528154	0.143796	0.0983056		0.0182256	0.109206	0.0637158
19_MeOH-Pyridine_1.50_dimer.out	-363.547	19_MeOH-Pyridine_1.50_cpA.out	-247.943	19_MeOH-Pyridine_1.50_cpB.out	-115.598	19_MeOH-Pyridine_1.00_monomerA.out	-115.598	19_MeOH-Pyridine_1.00_monomerB.out	-247.943		3.4217	3.47444	3.44807		3.373	3.385	3.40319		0.0487028	0.101438	0.0750706		0.0367028	0.0894383	0.0630706		0.0185166	0.071252	0.0448843
19_MeOH-Pyridine_2.00_dimer.out	-363.543	19_MeOH-Pyridine_2.00_cpA.out	-247.943	19_MeOH-Pyridine_2.00_cpB.out	-115.598	19_MeOH-Pyridine_1.00_monomerA.out	-115.598	19_MeOH-Pyridine_1.00_monomerB.out	-247.943		1.34678	1.36752	1.35715		1.328	1.336	1.34347		0.0187791	0.0395192	0.0291491		0.0107791	0.0315192	0.0211491		0.00331334	0.0240534	0.0136834
20_AcOH-AcOH_0.90_dimer.out	-457.718	20_AcOH-AcOH_0.90_cpA.out	-228.845	20_AcOH-AcOH_0.90_cpB.out	-228.845	20_AcOH-AcOH_1.00_monomerA.out	-228.845	20_AcOH-AcOH_1.00_monomerB.out	-228.845		17.3662	17.8374	17.6018		17.925	17.793	17.9699		-0.558793	-0.0875733	-0.323183		-0.426793	0.0444267	-0.191183		-0.60366	-0.132441	-0.36805
20_AcOH-AcOH_0.95_dimer.out	-457.72	20_AcOH-AcOH_0.95_cpA.out	-228.845	20_AcOH-AcOH_0.95_cpB.out	-228.845	20_AcOH-AcOH_1.00_monomerA.out	-228.845	20_AcOH-AcOH_1.00_monomerB.out	-228.845		18.7171	19.1115	18.9143		19.17	19.07	19.2277		-0.452898	-0.0585027	-0.2557		-0.352898	0.0414973	-0.1557		-0.510639	-0.116244	-0.313442
20_AcOH-AcOH_1.00_dimer.out	-457.721	20_AcOH-AcOH_1.00_cpA.out	-228.845	20_AcOH-AcOH_1.00_cpB.out	-228.845	20_AcOH-AcOH_1.00_monomerA.out	-228.845	20_AcOH-AcOH_1.00_monomerB.out	-228.845		19.0343	19.3682	19.2012		19.397	19.328	19.4687		-0.362728	-0.0288314	-0.19578		-0.293728	0.0401686	-0.12678		-0.434471	-0.100575	-0.267523
20_AcOH-AcOH_1.05_dimer.out	-457.72	20_AcOH-AcOH_1.05_cpA.out	-228.845	20_AcOH-AcOH_1.05_cpB.out	-228.845	20_AcOH-AcOH_1.00_monomerA.out	-228.845	20_AcOH-AcOH_1.00_monomerB.out	-228.845		18.6805	18.9656	18.823		18.965	18.923	19.0493		-0.284468	0.000558224	-0.141955		-0.242468	0.0425582	-0.0999547		-0.368788	-0.0837617	-0.226275
20_AcOH-AcOH_1.10_dimer.out	-457.719	20_AcOH-AcOH_1.10_cpA.out	-228.845	20_AcOH-AcOH_1.10_cpB.out	-228.845	20_AcOH-AcOH_1.00_monomerA.out	-228.845	20_AcOH-AcOH_1.00_monomerB.out	-228.845		17.9079	18.1527	18.0303		18.125	18.106	18.2195		-0.217149	0.027724	-0.0947123		-0.198149	0.046724	-0.0757123		-0.311623	-0.0667501	-0.189186
20_AcOH-AcOH_1.25_dimer.out	-457.713	20_AcOH-AcOH_1.25_cpA.out	-228.845	20_AcOH-AcOH_1.25_cpB.out	-228.845	20_AcOH-AcOH_1.00_monomerA.out	-228.845	20_AcOH-AcOH_1.00_monomerB.out	-228.845		14.5571	14.7166	14.6368		14.635	14.657	14.7358		-0.0779351	0.081603	0.00183392		-0.0999351	0.059603	-0.0201661		-0.178758	-0.0192198	-0.0989888
20_AcOH-AcOH_1.50_dimer.out	-457.705	20_AcOH-AcOH_1.50_cpA.out	-228.845	20_AcOH-AcOH_1.50_cpB.out	-228.845	20_AcOH-AcOH_1.00_monomerA.out	-228.845	20_AcOH-AcOH_1.00_monomerB.out	-228.845		9.22593	9.31153	9.26873		9.219	9.246	9.2885		0.00692627	0.0925321	0.0497292		-0.0200737	0.0655321	0.0227292		-0.0625778	0.023028	-0.0197749
20_AcOH-AcOH_2.00_dimer.out	-457.696	20_AcOH-AcOH_2.00_cpA.out	-228.845	20_AcOH-AcOH_2.00_cpB.out	-228.845	20_AcOH-AcOH_1.00_monomerA.out	-228.845	20_AcOH-AcOH_1.00_monomerB.out	-228.845		3.59172	3.62378	3.60775		3.594	3.595	3.61056		-0.0022766	0.029777	0.0137502		-0.0032766	0.028777	0.0127502		-0.0188394	0.0132142	-0.00281263
21_AcNH2-AcNH2_0.90_dimer.out	-417.982	21_AcNH2-AcNH2_0.90_cpA.out	-208.979	21_AcNH2-AcNH2_0.90_cpB.out	-208.979	21_AcNH2-AcNH2_1.00_monomerA.out	-208.979	21_AcNH2-AcNH2_1.00_monomerB.out	-208.979		14.6734	15.0264	14.8499		15.274	15.185	15.3351		-0.600585	-0.247554	-0.424069		-0.511585	-0.158554	-0.335069		-0.661733	-0.308702	-0.485218
21_AcNH2-AcNH2_0.95_dimer.out	-417.983	21_AcNH2-AcNH2_0.95_cpA.out	-208.979	21_AcNH2-AcNH2_0.95_cpB.out	-208.979	21_AcNH2-AcNH2_1.00_monomerA.out	-208.979	21_AcNH2-AcNH2_1.00_monomerB.out	-208.979		15.8119	16.1109	15.9614		16.299	16.242	16.375		-0.487069	-0.188104	-0.337586		-0.430069	-0.131104	-0.280586		-0.563103	-0.264137	-0.41362
21_AcNH2-AcNH2_1.00_dimer.out	-417.984	21_AcNH2-AcNH2_1.00_cpA.out	-208.979	21_AcNH2-AcNH2_1.00_cpB.out	-208.979	21_AcNH2-AcNH2_1.00_monomerA.out	-208.979	21_AcNH2-AcNH2_1.00_monomerB.out	-208.979		16.0821	16.3372	16.2096		16.472	16.441	16.5588		-0.389934	-0.134831	-0.262383		-0.358934	-0.103831	-0.231383		-0.476687	-0.221583	-0.349135
21_AcNH2-AcNH2_1.05_dimer.out	-417.983	21_AcNH2-AcNH2_1.05_cpA.out	-208.979	21_AcNH2-AcNH2_1.05_cpB.out	-208.979	21_AcNH2-AcNH2_1.00_monomerA.out	-208.979	21_AcNH2-AcNH2_1.00_monomerB.out	-208.979		15.7878	16.0064	15.8971		16.094	16.085	16.1883		-0.306189	-0.0875861	-0.196888		-0.297189	-0.0785861	-0.187888		-0.400479	-0.181876	-0.291178
21_AcNH2-AcNH2_1.10_dimer.out	-417.982	21_AcNH2-AcNH2_1.10_cpA.out	-208.979	21_AcNH2-AcNH2_1.10_cpB.out	-208.979	21_AcNH2-AcNH2_1.00_monomerA.out	-208.979	21_AcNH2-AcNH2_1.00_monomerB.out	-208.979		15.1428	15.3308	15.2368		15.38	15.386	15.4764		-0.237179	-0.0492256	-0.143203		-0.243179	-0.0552256	-0.149203		-0.333545	-0.145592	-0.239569
21_AcNH2-AcNH2_1.25_dimer.out	-417.978	21_AcNH2-AcNH2_1.25_cpA.out	-208.979	21_AcNH2-AcNH2_1.25_cpB.out	-208.979	21_AcNH2-AcNH2_1.00_monomerA.out	-208.979	21_AcNH2-AcNH2_1.00_monomerB.out	-208.979		12.3595	12.4812	12.4203		12.46	12.485	12.5444		-0.100463	0.0211581	-0.0396523		-0.125463	-0.00384185	-0.0646523		-0.184888	-0.0632669	-0.124077
21_AcNH2-AcNH2_1.50_dimer.out	-417.971	21_AcNH2-AcNH2_1.50_cpA.out	-208.979	21_AcNH2-AcNH2_1.50_cpB.out	-208.979	21_AcNH2-AcNH2_1.00_monomerA.out	-208.979	21_AcNH2-AcNH2_1.00_monomerB.out	-208.979		7.98274	8.04808	8.01541		8.007	8.022	8.05386		-0.024263	0.0410774	0.00840722		-0.039263	0.0260774	-0.00659278		-0.0711246	-0.00578426	-0.0384545
21_AcNH2-AcNH2_2.00_dimer.out	-417.963	21_AcNH2-AcNH2_2.00_cpA.out	-208.979	21_AcNH2-AcNH2_2.00_cpB.out	-208.979	21_AcNH2-AcNH2_1.00_monomerA.out	-208.979	21_AcNH2-AcNH2_1.00_monomerB.out	-208.979		2.99383	3.01453	3.00418		3.008	3.009	3.01978		-0.0141669	0.00653412	-0.00381641		-0.0151669	0.00553412	-0.00481641		-0.0259476	-0.00524655	-0.0155971
22_AcOH-Uracil_0.90_dimer.out	-643.227	22_AcOH-Uracil_0.90_cpA.out	-414.353	22_AcOH-Uracil_0.90_cpB.out	-228.845	22_AcOH-Uracil_1.00_monomerA.out	-228.845	22_AcOH-Uracil_1.00_monomerB.out	-414.353		17.6279	18.095	17.8614		18.324	18.241	18.421		-0.69613	-0.22898	-0.462555		-0.61313	-0.14598	-0.379555		-0.793102	-0.325952	-0.559527
22_AcOH-Uracil_0.95_dimer.out	-643.229	22_AcOH-Uracil_0.95_cpA.out	-414.353	22_AcOH-Uracil_0.95_cpB.out	-228.845	22_AcOH-Uracil_1.00_monomerA.out	-228.845	22_AcOH-Uracil_1.00_monomerB.out	-414.353		18.9427	19.3417	19.1422		19.524	19.47	19.6319		-0.581349	-0.182302	-0.381826		-0.527349	-0.128302	-0.327826		-0.689283	-0.290237	-0.48976
22_AcOH-Uracil_1.00_dimer.out	-643.229	22_AcOH-Uracil_1.00_cpA.out	-414.353	22_AcOH-Uracil_1.00_cpB.out	-228.845	22_AcOH-Uracil_1.00_monomerA.out	-228.845	22_AcOH-Uracil_1.00_monomerB.out	-414.353		19.278	19.6222	19.4501		19.759	19.732	19.8775		-0.48101	-0.136757	-0.308883		-0.45401	-0.109757	-0.281883		-0.599469	-0.255217	-0.427343
22_AcOH-Uracil_1.05_dimer.out	-643.228	22_AcOH-Uracil_1.05_cpA.out	-414.353	22_AcOH-Uracil_1.05_cpB.out	-228.845	22_AcOH-Uracil_1.00_monomerA.out	-228.845	22_AcOH-Uracil_1.00_monomerB.out	-414.353		18.9683	19.2669	19.1176		19.361	19.358	19.4881		-0.392681	-0.0941442	-0.243413		-0.389681	-0.0911442	-0.240413		-0.519743	-0.221206	-0.370474
22_AcOH-Uracil_1.10_dimer.out	-643.227	22_AcOH-Uracil_1.10_cpA.out	-414.353	22_AcOH-Uracil_1.10_cpB.out	-228.845	22_AcOH-Uracil_1.00_monomerA.out	-228.845	22_AcOH-Uracil_1.00_monomerB.out	-414.353		18.249	18.5091	18.3791		18.565	18.581	18.6975		-0.315957	-0.055908	-0.185933		-0.331957	-0.071908	-0.201933		-0.448425	-0.188375	-0.3184
22_AcOH-Uracil_1.25_dimer.out	-643.222	22_AcOH-Uracil_1.25_cpA.out	-414.353	22_AcOH-Uracil_1.25_cpB.out	-228.845	22_AcOH-Uracil_1.00_monomerA.out	-228.845	22_AcOH-Uracil_1.00_monomerB.out	-414.353		15.0458	15.2214	15.1336		15.198	15.243	15.3249		-0.152158	0.0233594	-0.0643994		-0.197158	-0.0216406	-0.109399		-0.279029	-0.103511	-0.19127
22_AcOH-Uracil_1.50_dimer.out	-643.214	22_AcOH-Uracil_1.50_cpA.out	-414.353	22_AcOH-Uracil_1.50_cpB.out	-228.845	22_AcOH-Uracil_1.00_monomerA.out	-228.845	22_AcOH-Uracil_1.00_monomerB.out	-414.353		9.82808	9.92731	9.8777		9.867	9.907	9.95316		-0.0389179	0.0603127	0.0106974		-0.0789179	0.0203127	-0.0293026		-0.125082	-0.0258517	-0.075467
22_AcOH-Uracil_2.00_dimer.out	-643.204	22_AcOH-Uracil_2.00_cpA.out	-414.353	22_AcOH-Uracil_2.00_cpB.out	-228.845	22_AcOH-Uracil_1.00_monomerA.out	-228.845	22_AcOH-Uracil_1.00_monomerB.out	-414.353		4.13459	4.17372	4.15416		4.15	4.161	4.17934		-0.0154074	0.0237205	0.00415657		-0.0264074	0.0127205	-0.00684343		-0.0447459	-0.00561795	-0.0251819
23_AcNH2-Uracil_0.90_dimer.out	-623.36	23_AcNH2-Uracil_0.90_cpA.out	-414.353	23_AcNH2-Uracil_0.90_cpB.out	-208.979	23_AcNH2-Uracil_1.00_monomerA.out	-208.979	23_AcNH2-Uracil_1.00_monomerB.out	-414.353		17.3629	17.783	17.573		18.076	18.011	18.1824		-0.713096	-0.292987	-0.503041		-0.648096	-0.227987	-0.438041		-0.819488	-0.39938	-0.609434
23_AcNH2-Uracil_0.95_dimer.out	-623.362	23_AcNH2-Uracil_0.95_cpA.out	-414.353	23_AcNH2-Uracil_0.95_cpB.out	-208.979	23_AcNH2-Uracil_1.00_monomerA.out	-208.979	23_AcNH2-Uracil_1.00_monomerB.out	-414.353		18.5973	18.9584	18.7778		19.195	19.157	19.3101		-0.597733	-0.236578	-0.417155		-0.559733	-0.198578	-0.379155		-0.712876	-0.351721	-0.532299
23_AcNH2-Uracil_1.00_dimer.out	-623.362	23_AcNH2-Uracil_1.00_cpA.out	-414.353	23_AcNH2-Uracil_1.00_cpB.out	-208.979	23_AcNH2-Uracil_1.00_monomerA.out	-208.979	23_AcNH2-Uracil_1.00_monomerB.out	-414.353		18.9381	19.2508	19.0945		19.432	19.419	19.5567		-0.493885	-0.181196	-0.337541		-0.480885	-0.168196	-0.324541		-0.618569	-0.30588	-0.462225
23_AcNH2-Uracil_1.05_dimer.out	-623.362	23_AcNH2-Uracil_1.05_cpA.out	-414.353	23_AcNH2-Uracil_1.05_cpB.out	-208.979	23_AcNH2-Uracil_1.00_monomerA.out	-208.979	23_AcNH2-Uracil_1.00_monomerB.out	-414.353		18.6812	18.954	18.8176		19.086	19.094	19.2169		-0.404771	-0.131986	-0.268379		-0.412771	-0.139986	-0.276379		-0.535682	-0.262897	-0.39929
23_AcNH2-Uracil_1.10_dimer.out	-623.361	23_AcNH2-Uracil_1.10_cpA.out	-414.353	23_AcNH2-Uracil_1.10_cpB.out	-208.979	23_AcNH2-Uracil_1.00_monomerA.out	-208.979	23_AcNH2-Uracil_1.00_monomerB.out	-414.353		18.04	18.2786	18.1593		18.367	18.391	18.501		-0.327008	-0.0883909	-0.207699		-0.351008	-0.112391	-0.231699		-0.461053	-0.222436	-0.341745
23_AcNH2-Uracil_1.25_dimer.out	-623.356	23_AcNH2-Uracil_1.25_cpA.out	-414.353	23_AcNH2-Uracil_1.25_cpB.out	-208.979	23_AcNH2-Uracil_1.00_monomerA.out	-208.979	23_AcNH2-Uracil_1.00_monomerB.out	-414.353		15.0996	15.2615	15.1806		15.265	15.309	15.3858		-0.165363	-0.00353695	-0.0844499		-0.209363	-0.0475369	-0.12845		-0.286181	-0.124355	-0.205268
23_AcNH2-Uracil_1.50_dimer.out	-623.348	23_AcNH2-Uracil_1.50_cpA.out	-414.353	23_AcNH2-Uracil_1.50_cpB.out	-208.979	23_AcNH2-Uracil_1.00_monomerA.out	-208.979	23_AcNH2-Uracil_1.00_monomerB.out	-414.353		10.1886	10.2819	10.2352		10.24	10.276	10.3196		-0.0514051	0.0418841	-0.00476049		-0.0874051	0.00588407	-0.0407605		-0.130978	-0.0376885	-0.084333
23_AcNH2-Uracil_2.00_dimer.out	-623.339	23_AcNH2-Uracil_2.00_cpA.out	-414.353	23_AcNH2-Uracil_2.00_cpB.out	-208.979	23_AcNH2-Uracil_1.00_monomerA.out	-208.979	23_AcNH2-Uracil_1.00_monomerB.out	-414.353		4.64092	4.67764	4.65928		4.662	4.672	4.69061		-0.0210753	0.0156418	-0.00271676		-0.0310753	0.00564181	-0.0127168		-0.0496819	-0.0129648	-0.0313234
24_Benzene-Benzene_pi-pi_0.90_dimer.out	-463.826	24_Benzene-Benzene_pi-pi_0.90_cpA.out	-231.913	24_Benzene-Benzene_pi-pi_0.90_cpB.out	-231.913	24_Benzene-Benzene_pi-pi_1.00_monomerA.out	-231.913	24_Benzene-Benzene_pi-pi_1.00_monomerB.out	-231.913		0.0809623	0.530634	0.305798		-0.138	0.03	0.105376		0.218962	0.668634	0.443798		0.0509623	0.500634	0.275798		-0.0244137	0.425258	0.200422
24_Benzene-Benzene_pi-pi_0.95_dimer.out	-463.829	24_Benzene-Benzene_pi-pi_0.95_cpA.out	-231.913	24_Benzene-Benzene_pi-pi_0.95_cpB.out	-231.913	24_Benzene-Benzene_pi-pi_1.00_monomerA.out	-231.913	24_Benzene-Benzene_pi-pi_1.00_monomerB.out	-231.913		1.98156	2.34971	2.16564		1.791	1.905	2.01598		0.190561	0.55871	0.374636		0.0765613	0.44471	0.260636		-0.0344204	0.333729	0.149654
24_Benzene-Benzene_pi-pi_1.00_dimer.out	-463.83	24_Benzene-Benzene_pi-pi_1.00_cpA.out	-231.913	24_Benzene-Benzene_pi-pi_1.00_cpB.out	-231.913	24_Benzene-Benzene_pi-pi_1.00_monomerA.out	-231.913	24_Benzene-Benzene_pi-pi_1.00_monomerB.out	-231.913		2.66414	2.96728	2.81571		2.521	2.634	2.72488		0.143136	0.446277	0.294706		0.0301359	0.333277	0.181706		-0.0607427	0.242398	0.0908276
24_Benzene-Benzene_pi-pi_1.05_dimer.out	-463.83	24_Benzene-Benzene_pi-pi_1.05_cpA.out	-231.913	24_Benzene-Benzene_pi-pi_1.05_cpB.out	-231.913	24_Benzene-Benzene_pi-pi_1.00_monomerA.out	-231.913	24_Benzene-Benzene_pi-pi_1.00_monomerB.out	-231.913		2.71837	2.97092	2.84465		2.633	2.739	2.81335		0.0853671	0.337924	0.211645		-0.0206329	0.231924	0.105645		-0.0949782	0.157579	0.0313003
24_Benzene-Benzene_pi-pi_1.10_dimer.out	-463.829	24_Benzene-Benzene_pi-pi_1.10_cpA.out	-231.913	24_Benzene-Benzene_pi-pi_1.10_cpB.out	-231.913	24_Benzene-Benzene_pi-pi_1.00_monomerA.out	-231.913	24_Benzene-Benzene_pi-pi_1.00_monomerB.out	-231.913		2.47646	2.68415	2.5803		2.45	2.546	2.60708		0.0264595	0.234147	0.130303		-0.0695405	0.138147	0.0343033		-0.130623	0.0770648	-0.026779
24_Benzene-Benzene_pi-pi_1.25_dimer.out	-463.827	24_Benzene-Benzene_pi-pi_1.25_cpA.out	-231.913	24_Benzene-Benzene_pi-pi_1.25_cpB.out	-231.913	24_Benzene-Benzene_pi-pi_1.00_monomerA.out	-231.913	24_Benzene-Benzene_pi-pi_1.00_monomerB.out	-231.913		1.36752	1.48503	1.42628		1.479	1.543	1.57756		-0.111483	0.00603452	-0.0527245		-0.175483	-0.0579655	-0.116724		-0.210045	-0.0925273	-0.151286
24_Benzene-Benzene_pi-pi_1.50_dimer.out	-463.826	24_Benzene-Benzene_pi-pi_1.50_cpA.out	-231.913	24_Benzene-Benzene_pi-pi_1.50_cpB.out	-231.913	24_Benzene-Benzene_pi-pi_1.00_monomerA.out	-231.913	24_Benzene-Benzene_pi-pi_1.00_monomerB.out	-231.913		0.300792	0.35127	0.326031		0.468	0.499	0.515145		-0.167208	-0.11673	-0.141969		-0.198208	-0.14773	-0.172969		-0.214353	-0.163876	-0.189114
24_Benzene-Benzene_pi-pi_2.00_dimer.out	-463.825	24_Benzene-Benzene_pi-pi_2.00_cpA.out	-231.913	24_Benzene-Benzene_pi-pi_2.00_cpB.out	-231.913	24_Benzene-Benzene_pi-pi_1.00_monomerA.out	-231.913	24_Benzene-Benzene_pi-pi_1.00_monomerB.out	-231.913		-0.0119042	-0.000669072	-0.00628665		0.059	0.067	0.0718033		-0.0709042	-0.0596691	-0.0652867		-0.0789042	-0.0676691	-0.0732867		-0.0837075	-0.0724724	-0.07809
25_Pyridine-Pyridine_pi-pi_0.90_dimer.out	-495.888	25_Pyridine-Pyridine_pi-pi_0.90_cpA.out	-247.943	25_Pyridine-Pyridine_pi-pi_0.90_cpB.out	-247.943	25_Pyridine-Pyridine_pi-pi_1.00_monomerA.out	-247.943	25_Pyridine-Pyridine_pi-pi_1.00_monomerB.out	-247.943		1.22927	1.68881	1.45904		0.964	1.063	1.20095		0.26527	0.724811	0.495041		0.16627	0.625811	0.396041		0.0283189	0.487861	0.25809
25_Pyridine-Pyridine_pi-pi_0.95_dimer.out	-495.891	25_Pyridine-Pyridine_pi-pi_0.95_cpA.out	-247.943	25_Pyridine-Pyridine_pi-pi_0.95_cpB.out	-247.943	25_Pyridine-Pyridine_pi-pi_1.00_monomerA.out	-247.943	25_Pyridine-Pyridine_pi-pi_1.00_monomerB.out	-247.943		3.13002	3.51064	3.32033		2.891	2.997	3.11051		0.23902	0.619644	0.429332		0.13302	0.513644	0.323332		0.0195057	0.400129	0.209817
25_Pyridine-Pyridine_pi-pi_1.00_dimer.out	-495.892	25_Pyridine-Pyridine_pi-pi_1.00_cpA.out	-247.943	25_Pyridine-Pyridine_pi-pi_1.00_cpB.out	-247.943	25_Pyridine-Pyridine_pi-pi_1.00_monomerA.out	-247.943	25_Pyridine-Pyridine_pi-pi_1.00_monomerB.out	-247.943		3.80263	4.11835	3.96049		3.61	3.716	3.80907		0.192632	0.508346	0.350489		0.0866317	0.402346	0.244489		-0.00643383	0.30928	0.151423
25_Pyridine-Pyridine_pi-pi_1.05_dimer.out	-495.892	25_Pyridine-Pyridine_pi-pi_1.05_cpA.out	-247.943	25_Pyridine-Pyridine_pi-pi_1.05_cpB.out	-247.943	25_Pyridine-Pyridine_pi-pi_1.00_monomerA.out	-247.943	25_Pyridine-Pyridine_pi-pi_1.00_monomerB.out	-247.943		3.82184	4.08303	3.95244		3.689	3.788	3.86521		0.132841	0.394032	0.263437		0.0338406	0.295032	0.164437		-0.0433682	0.217824	0.0872278
25_Pyridine-Pyridine_pi-pi_1.10_dimer.out	-495.892	25_Pyridine-Pyridine_pi-pi_1.10_cpA.out	-247.943	25_Pyridine-Pyridine_pi-pi_1.10_cpB.out	-247.943	25_Pyridine-Pyridine_pi-pi_1.00_monomerA.out	-247.943	25_Pyridine-Pyridine_pi-pi_1.00_monomerB.out	-247.943		3.52432	3.74076	3.63254		3.452	3.543	3.60651		0.0723163	0.288764	0.18054		-0.0186837	0.197764	0.0895403		-0.082195	0.134253	0.0260289
25_Pyridine-Pyridine_pi-pi_1.25_dimer.out	-495.889	25_Pyridine-Pyridine_pi-pi_1.25_cpA.out	-247.943	25_Pyridine-Pyridine_pi-pi_1.25_cpB.out	-247.943	25_Pyridine-Pyridine_pi-pi_1.00_monomerA.out	-247.943	25_Pyridine-Pyridine_pi-pi_1.00_monomerB.out	-247.943		2.22079	2.34752	2.28415		2.299	2.36	2.39647		-0.0782145	0.0485242	-0.0148451		-0.139214	-0.0124758	-0.0758451		-0.175681	-0.0489422	-0.112312
25_Pyridine-Pyridine_pi-pi_1.50_dimer.out	-495.887	25_Pyridine-Pyridine_pi-pi_1.50_cpA.out	-247.943	25_Pyridine-Pyridine_pi-pi_1.50_cpB.out	-247.943	25_Pyridine-Pyridine_pi-pi_1.00_monomerA.out	-247.943	25_Pyridine-Pyridine_pi-pi_1.00_monomerB.out	-247.943		0.780219	0.834659	0.807439		0.945	0.974	0.990079		-0.164781	-0.110341	-0.137561		-0.193781	-0.139341	-0.166561		-0.209859	-0.15542	-0.182639
25_Pyridine-Pyridine_pi-pi_2.00_dimer.out	-495.886	25_Pyridine-Pyridine_pi-pi_2.00_cpA.out	-247.943	25_Pyridine-Pyridine_pi-pi_2.00_cpB.out	-247.943	25_Pyridine-Pyridine_pi-pi_1.00_monomerA.out	-247.943	25_Pyridine-Pyridine_pi-pi_1.00_monomerB.out	-247.943		0.149521	0.162943	0.156232		0.233	0.241	0.245614		-0.0834795	-0.0700572	-0.0767684		-0.0914795	-0.0780572	-0.0847684		-0.0960937	-0.0826715	-0.0893826
26_Uracil-Uracil_pi-pi_0.90_dimer.out	-828.719	26_Uracil-Uracil_pi-pi_0.90_cpA.out	-414.354	26_Uracil-Uracil_pi-pi_0.90_cpB.out	-414.354	26_Uracil-Uracil_pi-pi_1.00_monomerA.out	-414.353	26_Uracil-Uracil_pi-pi_1.00_monomerB.out	-414.353		6.70208	7.51799	7.11003		7.593	7.693	7.97577		-0.890923	-0.0750077	-0.482965		-0.990923	-0.175008	-0.582965		-1.27369	-0.457778	-0.865735
26_Uracil-Uracil_pi-pi_0.95_dimer.out	-828.722	26_Uracil-Uracil_pi-pi_0.95_cpA.out	-414.354	26_Uracil-Uracil_pi-pi_0.95_cpB.out	-414.354	26_Uracil-Uracil_pi-pi_1.00_monomerA.out	-414.353	26_Uracil-Uracil_pi-pi_1.00_monomerB.out	-414.353		8.61724	9.32423	8.97073		9.266	9.396	9.64006		-0.648762	0.058231	-0.295266		-0.778762	-0.071769	-0.425266		-1.02282	-0.315828	-0.669325
26_Uracil-Uracil_pi-pi_1.00_dimer.out	-828.722	26_Uracil-Uracil_pi-pi_1.00_cpA.out	-414.354	26_Uracil-Uracil_pi-pi_1.00_cpB.out	-414.354	26_Uracil-Uracil_pi-pi_1.00_monomerA.out	-414.353	26_Uracil-Uracil_pi-pi_1.00_monomerB.out	-414.353		9.13128	9.74208	9.43668		9.619	9.765	9.97639		-0.487717	0.123084	-0.182316		-0.633717	-0.0229155	-0.328316		-0.845104	-0.234302	-0.539703
26_Uracil-Uracil_pi-pi_1.05_dimer.out	-828.722	26_Uracil-Uracil_pi-pi_1.05_cpA.out	-414.354	26_Uracil-Uracil_pi-pi_1.05_cpB.out	-414.354	26_Uracil-Uracil_pi-pi_1.00_monomerA.out	-414.353	26_Uracil-Uracil_pi-pi_1.00_monomerB.out	-414.353		8.86291	9.39019	9.12655		9.256	9.406	9.58987		-0.393093	0.134186	-0.129453		-0.543093	-0.0158136	-0.279453		-0.72696	-0.199681	-0.463321
26_Uracil-Uracil_pi-pi_1.10_dimer.out	-828.721	26_Uracil-Uracil_pi-pi_1.10_cpA.out	-414.354	26_Uracil-Uracil_pi-pi_1.10_cpB.out	-414.354	26_Uracil-Uracil_pi-pi_1.00_monomerA.out	-414.353	26_Uracil-Uracil_pi-pi_1.00_monomerB.out	-414.353		8.19987	8.65541	8.42764		8.541	8.688	8.84824		-0.341134	0.114412	-0.113361		-0.488134	-0.032588	-0.260361		-0.648371	-0.192825	-0.420598
26_Uracil-Uracil_pi-pi_1.25_dimer.out	-828.716	26_Uracil-Uracil_pi-pi_1.25_cpA.out	-414.354	26_Uracil-Uracil_pi-pi_1.25_cpB.out	-414.354	26_Uracil-Uracil_pi-pi_1.00_monomerA.out	-414.353	26_Uracil-Uracil_pi-pi_1.00_monomerB.out	-414.353		5.67985	5.97927	5.82956		5.993	6.11	6.21709		-0.313149	-0.0137315	-0.16344		-0.430149	-0.130731	-0.28044		-0.537239	-0.237821	-0.38753
26_Uracil-Uracil_pi-pi_1.50_dimer.out	-828.712	26_Uracil-Uracil_pi-pi_1.50_cpA.out	-414.354	26_Uracil-Uracil_pi-pi_1.50_cpB.out	-414.354	26_Uracil-Uracil_pi-pi_1.00_monomerA.out	-414.353	26_Uracil-Uracil_pi-pi_1.00_monomerB.out	-414.353		2.74979	2.90494	2.82736		3.071	3.138	3.19565		-0.321213	-0.166058	-0.243635		-0.388213	-0.233058	-0.310635		-0.445861	-0.290706	-0.368283
26_Uracil-Uracil_pi-pi_2.00_dimer.out	-828.708	26_Uracil-Uracil_pi-pi_2.00_cpA.out	-414.353	26_Uracil-Uracil_pi-pi_2.00_cpB.out	-414.353	26_Uracil-Uracil_pi-pi_1.00_monomerA.out	-414.353	26_Uracil-Uracil_pi-pi_1.00_monomerB.out	-414.353		0.790798	0.837106	0.813952		0.986	1.013	1.03386		-0.195202	-0.148894	-0.172048		-0.222202	-0.175894	-0.199048		-0.243064	-0.196756	-0.21991
27_Benzene-Pyridine_pi-pi_0.90_dimer.out	-479.857	27_Benzene-Pyridine_pi-pi_0.90_cpA.out	-247.943	27_Benzene-Pyridine_pi-pi_0.90_cpB.out	-231.913	27_Benzene-Pyridine_pi-pi_1.00_monomerA.out	-231.913	27_Benzene-Pyridine_pi-pi_1.00_monomerB.out	-247.943		0.593585	1.05319	0.82339		0.362	0.463	0.602151		0.231585	0.691194	0.46139		0.130585	0.590194	0.36039		-0.00856607	0.451044	0.221239
27_Benzene-Pyridine_pi-pi_0.95_dimer.out	-479.86	27_Benzene-Pyridine_pi-pi_0.95_cpA.out	-247.943	27_Benzene-Pyridine_pi-pi_0.95_cpB.out	-231.913	27_Benzene-Pyridine_pi-pi_1.00_monomerA.out	-231.913	27_Benzene-Pyridine_pi-pi_1.00_monomerB.out	-247.943		2.62297	3.00122	2.8121		2.413	2.523	2.63579		0.209974	0.588223	0.399098		0.099974	0.478223	0.289098		-0.0128116	0.365437	0.176313
27_Benzene-Pyridine_pi-pi_1.00_dimer.out	-479.861	27_Benzene-Pyridine_pi-pi_1.00_cpA.out	-247.943	27_Benzene-Pyridine_pi-pi_1.00_cpB.out	-231.913	27_Benzene-Pyridine_pi-pi_1.00_monomerA.out	-231.913	27_Benzene-Pyridine_pi-pi_1.00_monomerB.out	-247.943		3.31979	3.62973	3.47476		3.156	3.265	3.35795		0.163795	0.473729	0.318762		0.0547947	0.364729	0.209762		-0.0381561	0.271778	0.116811
27_Benzene-Pyridine_pi-pi_1.05_dimer.out	-479.861	27_Benzene-Pyridine_pi-pi_1.05_cpA.out	-247.943	27_Benzene-Pyridine_pi-pi_1.05_cpB.out	-231.913	27_Benzene-Pyridine_pi-pi_1.00_monomerA.out	-231.913	27_Benzene-Pyridine_pi-pi_1.00_monomerB.out	-247.943		3.34165	3.59985	3.47075		3.234	3.338	3.41398		0.107651	0.365848	0.23675		0.00365073	0.261848	0.13275		-0.0723333	0.185864	0.0567656
27_Benzene-Pyridine_pi-pi_1.10_dimer.out	-479.861	27_Benzene-Pyridine_pi-pi_1.10_cpA.out	-247.943	27_Benzene-Pyridine_pi-pi_1.10_cpB.out	-231.913	27_Benzene-Pyridine_pi-pi_1.00_monomerA.out	-231.913	27_Benzene-Pyridine_pi-pi_1.00_monomerB.out	-247.943		3.04902	3.2612	3.15511		3.001	3.096	3.15867		0.048015	0.260198	0.154106		-0.046985	0.165198	0.0591063		-0.109653	0.102529	-0.00356186
27_Benzene-Pyridine_pi-pi_1.25_dimer.out	-479.858	27_Benzene-Pyridine_pi-pi_1.25_cpA.out	-247.943	27_Benzene-Pyridine_pi-pi_1.25_cpB.out	-231.913	27_Benzene-Pyridine_pi-pi_1.00_monomerA.out	-231.913	27_Benzene-Pyridine_pi-pi_1.00_monomerB.out	-247.943		1.81858	1.94207	1.88032		1.913	1.976	2.01249		-0.094421	0.0290693	-0.0326758		-0.157421	-0.0339307	-0.0956758		-0.193907	-0.0704171	-0.132162
27_Benzene-Pyridine_pi-pi_1.50_dimer.out	-479.856	27_Benzene-Pyridine_pi-pi_1.50_cpA.out	-247.943	27_Benzene-Pyridine_pi-pi_1.50_cpB.out	-231.913	27_Benzene-Pyridine_pi-pi_1.00_monomerA.out	-231.913	27_Benzene-Pyridine_pi-pi_1.00_monomerB.out	-247.943		0.539853	0.591818	0.565836		0.705	0.735	0.752017		-0.165147	-0.113182	-0.139164		-0.195147	-0.143182	-0.169164		-0.212164	-0.160199	-0.186181
27_Benzene-Pyridine_pi-pi_2.00_dimer.out	-479.856	27_Benzene-Pyridine_pi-pi_2.00_cpA.out	-247.943	27_Benzene-Pyridine_pi-pi_2.00_cpB.out	-231.913	27_Benzene-Pyridine_pi-pi_1.00_monomerA.out	-231.913	27_Benzene-Pyridine_pi-pi_1.00_monomerB.out	-247.943		0.0656881	0.0784837	0.0720859		0.143	0.151	0.155335		-0.0773119	-0.0645163	-0.0709141		-0.0853119	-0.0725163	-0.0789141		-0.0896474	-0.0768518	-0.0832496
28_Benzene-Uracil_pi-pi_0.90_dimer.out	-646.272	28_Benzene-Uracil_pi-pi_0.90_cpA.out	-414.354	28_Benzene-Uracil_pi-pi_0.90_cpB.out	-231.913	28_Benzene-Uracil_pi-pi_1.00_monomerA.out	-231.912	28_Benzene-Uracil_pi-pi_1.00_monomerB.out	-414.354		2.78039	3.41475	3.09757		3.178	3.278	3.49156		-0.397611	0.236749	-0.0804309		-0.497611	0.136749	-0.180431		-0.711176	-0.0768154	-0.393996
28_Benzene-Uracil_pi-pi_0.95_dimer.out	-646.275	28_Benzene-Uracil_pi-pi_0.95_cpA.out	-414.354	28_Benzene-Uracil_pi-pi_0.95_cpB.out	-231.913	28_Benzene-Uracil_pi-pi_1.00_monomerA.out	-231.912	28_Benzene-Uracil_pi-pi_1.00_monomerB.out	-414.354		4.64915	5.18795	4.91855		4.924	5.041	5.22194		-0.274853	0.263948	-0.00545254		-0.391853	0.146948	-0.122453		-0.572796	-0.0339955	-0.303396
28_Benzene-Uracil_pi-pi_1.00_dimer.out	-646.275	28_Benzene-Uracil_pi-pi_1.00_cpA.out	-414.354	28_Benzene-Uracil_pi-pi_1.00_cpB.out	-231.913	28_Benzene-Uracil_pi-pi_1.00_monomerA.out	-231.912	28_Benzene-Uracil_pi-pi_1.00_monomerB.out	-414.354		5.25446	5.71202	5.48324		5.465	5.588	5.74119		-0.210541	0.247018	0.0182384		-0.333541	0.124018	-0.104762		-0.486735	-0.0291762	-0.257956
28_Benzene-Uracil_pi-pi_1.05_dimer.out	-646.275	28_Benzene-Uracil_pi-pi_1.05_cpA.out	-414.354	28_Benzene-Uracil_pi-pi_1.05_cpB.out	-231.913	28_Benzene-Uracil_pi-pi_1.00_monomerA.out	-231.912	28_Benzene-Uracil_pi-pi_1.00_monomerB.out	-414.354		5.16812	5.55818	5.36315		5.351	5.475	5.60411		-0.182883	0.207182	0.0121497		-0.306883	0.0831823	-0.11185		-0.435992	-0.0459267	-0.240959
28_Benzene-Uracil_pi-pi_1.10_dimer.out	-646.274	28_Benzene-Uracil_pi-pi_1.10_cpA.out	-414.354	28_Benzene-Uracil_pi-pi_1.10_cpB.out	-231.913	28_Benzene-Uracil_pi-pi_1.00_monomerA.out	-231.912	28_Benzene-Uracil_pi-pi_1.00_monomerB.out	-414.354		4.73183	5.06283	4.89733		4.916	5.034	5.14357		-0.184166	0.146827	-0.0186698		-0.302166	0.0288265	-0.13667		-0.411735	-0.0807428	-0.246239
28_Benzene-Uracil_pi-pi_1.25_dimer.out	-646.271	28_Benzene-Uracil_pi-pi_1.25_cpA.out	-414.354	28_Benzene-Uracil_pi-pi_1.25_cpB.out	-231.913	28_Benzene-Uracil_pi-pi_1.00_monomerA.out	-231.912	28_Benzene-Uracil_pi-pi_1.00_monomerB.out	-414.354		2.96626	3.17485	3.07056		3.207	3.296	3.36301		-0.240736	-0.0321498	-0.136443		-0.329736	-0.12115	-0.225443		-0.396747	-0.188161	-0.292454
28_Benzene-Uracil_pi-pi_1.50_dimer.out	-646.268	28_Benzene-Uracil_pi-pi_1.50_cpA.out	-414.354	28_Benzene-Uracil_pi-pi_1.50_cpB.out	-231.913	28_Benzene-Uracil_pi-pi_1.00_monomerA.out	-231.912	28_Benzene-Uracil_pi-pi_1.00_monomerB.out	-414.354		1.05141	1.14998	1.10069		1.334	1.38	1.41237		-0.282591	-0.18402	-0.233306		-0.328591	-0.23002	-0.279306		-0.360959	-0.262387	-0.311673
28_Benzene-Uracil_pi-pi_2.00_dimer.out	-646.267	28_Benzene-Uracil_pi-pi_2.00_cpA.out	-414.354	28_Benzene-Uracil_pi-pi_2.00_cpB.out	-231.913	28_Benzene-Uracil_pi-pi_1.00_monomerA.out	-231.912	28_Benzene-Uracil_pi-pi_1.00_monomerB.out	-414.354		0.0692019	0.0964178	0.0828098		0.246	0.26	0.271054		-0.176798	-0.149582	-0.16319		-0.190798	-0.163582	-0.17719		-0.201852	-0.174636	-0.188244
29_Pyridine-Uracil_pi-pi_0.90_dimer.out	-662.303	29_Pyridine-Uracil_pi-pi_0.90_cpA.out	-414.354	29_Pyridine-Uracil_pi-pi_0.90_cpB.out	-247.943	29_Pyridine-Uracil_pi-pi_1.00_monomerA.out	-247.943	29_Pyridine-Uracil_pi-pi_1.00_monomerB.out	-414.354		3.01059	3.67134	3.34097		3.374	3.46	3.67934		-0.363405	0.297341	-0.033032		-0.449405	0.211341	-0.119032		-0.66875	-0.00800348	-0.338377
29_Pyridine-Uracil_pi-pi_0.95_dimer.out	-662.307	29_Pyridine-Uracil_pi-pi_0.95_cpA.out	-414.354	29_Pyridine-Uracil_pi-pi_0.95_cpB.out	-247.943	29_Pyridine-Uracil_pi-pi_1.00_monomerA.out	-247.943	29_Pyridine-Uracil_pi-pi_1.00_monomerB.out	-414.354		5.67267	6.2189	5.94578		5.878	5.99	6.17031		-0.205334	0.340899	0.0677824		-0.317334	0.228899	-0.0442176		-0.497644	0.0485901	-0.224527
29_Pyridine-Uracil_pi-pi_1.00_dimer.out	-662.308	29_Pyridine-Uracil_pi-pi_1.00_cpA.out	-414.354	29_Pyridine-Uracil_pi-pi_1.00_cpB.out	-247.943	29_Pyridine-Uracil_pi-pi_1.00_monomerA.out	-247.943	29_Pyridine-Uracil_pi-pi_1.00_monomerB.out	-414.354		6.44902	6.903	6.67601		6.576	6.698	6.84711		-0.126984	0.326996	0.100006		-0.248984	0.204996	-0.0219942		-0.398095	0.0558857	-0.171105
29_Pyridine-Uracil_pi-pi_1.05_dimer.out	-662.307	29_Pyridine-Uracil_pi-pi_1.05_cpA.out	-414.354	29_Pyridine-Uracil_pi-pi_1.05_cpB.out	-247.943	29_Pyridine-Uracil_pi-pi_1.00_monomerA.out	-247.943	29_Pyridine-Uracil_pi-pi_1.00_monomerB.out	-414.354		6.28846	6.6655	6.47698		6.391	6.513	6.63673		-0.102535	0.274503	0.0859839		-0.224535	0.152503	-0.0360161		-0.34826	0.0287776	-0.159741
29_Pyridine-Uracil_pi-pi_1.10_dimer.out	-662.306	29_Pyridine-Uracil_pi-pi_1.10_cpA.out	-414.354	29_Pyridine-Uracil_pi-pi_1.10_cpB.out	-247.943	29_Pyridine-Uracil_pi-pi_1.00_monomerA.out	-247.943	29_Pyridine-Uracil_pi-pi_1.00_monomerB.out	-414.354		5.70847	6.0203	5.86438		5.82	5.936	6.03884		-0.111533	0.200302	0.0443841		-0.227533	0.0843016	-0.0716159		-0.330377	-0.0185421	-0.17446
29_Pyridine-Uracil_pi-pi_1.25_dimer.out	-662.303	29_Pyridine-Uracil_pi-pi_1.25_cpA.out	-414.354	29_Pyridine-Uracil_pi-pi_1.25_cpB.out	-247.943	29_Pyridine-Uracil_pi-pi_1.00_monomerA.out	-247.943	29_Pyridine-Uracil_pi-pi_1.00_monomerB.out	-414.354		3.60224	3.78791	3.69508		3.793	3.876	3.93693		-0.190756	-0.00508941	-0.0979228		-0.273756	-0.0880894	-0.180923		-0.334685	-0.149018	-0.241851
29_Pyridine-Uracil_pi-pi_1.50_dimer.out	-662.299	29_Pyridine-Uracil_pi-pi_1.50_cpA.out	-414.354	29_Pyridine-Uracil_pi-pi_1.50_cpB.out	-247.943	29_Pyridine-Uracil_pi-pi_1.00_monomerA.out	-247.943	29_Pyridine-Uracil_pi-pi_1.00_monomerB.out	-414.354		1.51802	1.60318	1.5606		1.752	1.796	1.82447		-0.233982	-0.148821	-0.191401		-0.277982	-0.192821	-0.235401		-0.306447	-0.221286	-0.263867
29_Pyridine-Uracil_pi-pi_2.00_dimer.out	-662.297	29_Pyridine-Uracil_pi-pi_2.00_cpA.out	-414.354	29_Pyridine-Uracil_pi-pi_2.00_cpB.out	-247.943	29_Pyridine-Uracil_pi-pi_1.00_monomerA.out	-247.943	29_Pyridine-Uracil_pi-pi_1.00_monomerB.out	-414.354		0.399811	0.422351	0.411081		0.529	0.543	0.552071		-0.129189	-0.106649	-0.117919		-0.143189	-0.120649	-0.131919		-0.15226	-0.12972	-0.14099
30_Benzene-Ethene_0.90_dimer.out	-310.385	30_Benzene-Ethene_0.90_cpA.out	-78.4723	30_Benzene-Ethene_0.90_cpB.out	-231.913	30_Benzene-Ethene_1.00_monomerA.out	-231.913	30_Benzene-Ethene_1.00_monomerB.out	-78.4722		0.169139	0.410666	0.289903		0.021	0.048	0.110963		0.148139	0.389666	0.268903		0.121139	0.362666	0.241903		0.0581759	0.299703	0.178939
30_Benzene-Ethene_0.95_dimer.out	-310.387	30_Benzene-Ethene_0.95_cpA.out	-78.4723	30_Benzene-Ethene_0.95_cpB.out	-231.913	30_Benzene-Ethene_1.00_monomerA.out	-231.913	30_Benzene-Ethene_1.00_monomerB.out	-78.4722		1.07923	1.27897	1.1791		0.939	0.977	1.02729		0.14023	0.339972	0.240101		0.10223	0.301972	0.202101		0.0519397	0.251681	0.151811
30_Benzene-Ethene_1.00_dimer.out	-310.387	30_Benzene-Ethene_1.00_cpA.out	-78.4723	30_Benzene-Ethene_1.00_cpB.out	-231.913	30_Benzene-Ethene_1.00_monomerA.out	-231.913	30_Benzene-Ethene_1.00_monomerB.out	-78.4722		1.38389	1.54805	1.46597		1.269	1.31	1.35041		0.114891	0.279048	0.196969		0.0738909	0.238048	0.155969		0.033482	0.197639	0.115561
30_Benzene-Ethene_1.05_dimer.out	-310.387	30_Benzene-Ethene_1.05_cpA.out	-78.4723	30_Benzene-Ethene_1.05_cpB.out	-231.913	30_Benzene-Ethene_1.00_monomerA.out	-231.913	30_Benzene-Ethene_1.00_monomerB.out	-78.4722		1.37456	1.50931	1.44193		1.292	1.333	1.36583		0.0825598	0.217308	0.149934		0.0415598	0.176308	0.108934		0.00872568	0.143474	0.0760999
30_Benzene-Ethene_1.10_dimer.out	-310.387	30_Benzene-Ethene_1.10_cpA.out	-78.4722	30_Benzene-Ethene_1.10_cpB.out	-231.913	30_Benzene-Ethene_1.00_monomerA.out	-231.913	30_Benzene-Ethene_1.00_monomerB.out	-78.4722		1.21904	1.33032	1.27468		1.172	1.21	1.23689		0.0470439	0.158317	0.10268		0.00904392	0.120317	0.0646805		-0.0178505	0.0934227	0.0377861
30_Benzene-Ethene_1.25_dimer.out	-310.386	30_Benzene-Ethene_1.25_cpA.out	-78.4722	30_Benzene-Ethene_1.25_cpB.out	-231.913	30_Benzene-Ethene_1.00_monomerA.out	-231.913	30_Benzene-Ethene_1.00_monomerB.out	-78.4722		0.609896	0.671478	0.640687		0.651	0.678	0.69203		-0.0411038	0.020478	-0.0103129		-0.0681038	-0.00652198	-0.0373129		-0.0821335	-0.0205517	-0.0513426
30_Benzene-Ethene_1.50_dimer.out	-310.385	30_Benzene-Ethene_1.50_cpA.out	-78.4722	30_Benzene-Ethene_1.50_cpB.out	-231.913	30_Benzene-Ethene_1.00_monomerA.out	-231.913	30_Benzene-Ethene_1.00_monomerB.out	-78.4722		0.0683514	0.093555	0.0809532		0.159	0.176	0.182771		-0.0906486	-0.065445	-0.0780468		-0.107649	-0.082445	-0.0950468		-0.11442	-0.0892163	-0.101818
30_Benzene-Ethene_2.00_dimer.out	-310.385	30_Benzene-Ethene_2.00_cpA.out	-78.4722	30_Benzene-Ethene_2.00_cpB.out	-231.913	30_Benzene-Ethene_1.00_monomerA.out	-231.913	30_Benzene-Ethene_1.00_monomerB.out	-78.4722		-0.0589507	-0.0529546	-0.0559526		-0.013	-0.008	-0.00645559		-0.0459507	-0.0399546	-0.0429526		-0.0509507	-0.0449546	-0.0479526		-0.0524951	-0.046499	-0.049497
31_Uracil-Ethene_0.90_dimer.out	-492.83	31_Uracil-Ethene_0.90_cpA.out	-78.4724	31_Uracil-Ethene_0.90_cpB.out	-414.354	31_Uracil-Ethene_1.00_monomerA.out	-414.354	31_Uracil-Ethene_1.00_monomerB.out	-78.4722		2.2004	2.51326	2.35683		2.396	2.424	2.51916		-0.195598	0.117263	-0.0391674		-0.223598	0.0892631	-0.0671674		-0.318757	-0.00589643	-0.162327
31_Uracil-Ethene_0.95_dimer.out	-492.831	31_Uracil-Ethene_0.95_cpA.out	-78.4723	31_Uracil-Ethene_0.95_cpB.out	-414.354	31_Uracil-Ethene_1.00_monomerA.out	-414.354	31_Uracil-Ethene_1.00_monomerB.out	-78.4722		2.97722	3.24198	3.1096		3.092	3.13	3.2089		-0.114785	0.149983	0.0175989		-0.152785	0.111983	-0.0204011		-0.231682	0.0330855	-0.0992981
31_Uracil-Ethene_1.00_dimer.out	-492.832	31_Uracil-Ethene_1.00_cpA.out	-78.4723	31_Uracil-Ethene_1.00_cpB.out	-414.354	31_Uracil-Ethene_1.00_monomerA.out	-414.354	31_Uracil-Ethene_1.00_monomerB.out	-78.4722		3.18867	3.41234	3.30051		3.257	3.3	3.36541		-0.0683278	0.15534	0.0435063		-0.111328	0.11234	0.000506261		-0.17674	0.0469282	-0.0649059
31_Uracil-Ethene_1.05_dimer.out	-492.831	31_Uracil-Ethene_1.05_cpA.out	-78.4723	31_Uracil-Ethene_1.05_cpB.out	-414.354	31_Uracil-Ethene_1.00_monomerA.out	-414.354	31_Uracil-Ethene_1.00_monomerB.out	-78.4722		3.0902	3.28092	3.18556		3.137	3.181	3.23506		-0.0467996	0.14392	0.0485601		-0.0907996	0.0999197	0.00456007		-0.144858	0.0458612	-0.0494985
31_Uracil-Ethene_1.10_dimer.out	-492.831	31_Uracil-Ethene_1.10_cpA.out	-78.4723	31_Uracil-Ethene_1.10_cpB.out	-414.354	31_Uracil-Ethene_1.00_monomerA.out	-414.354	31_Uracil-Ethene_1.00_monomerB.out	-78.4722		2.83681	3.00047	2.91864		2.878	2.921	2.96582		-0.04119	0.122467	0.0406383		-0.08419	0.0794666	-0.00236173		-0.129006	0.0346507	-0.0471776
31_Uracil-Ethene_1.25_dimer.out	-492.829	31_Uracil-Ethene_1.25_cpA.out	-78.4722	31_Uracil-Ethene_1.25_cpB.out	-414.354	31_Uracil-Ethene_1.00_monomerA.out	-414.354	31_Uracil-Ethene_1.00_monomerB.out	-78.4722		1.88531	1.98809	1.9367		1.949	1.981	2.00895		-0.0636894	0.0390926	-0.0122984		-0.0956894	0.00709264	-0.0442984		-0.123643	-0.020861	-0.0722521
31_Uracil-Ethene_1.50_dimer.out	-492.827	31_Uracil-Ethene_1.50_cpA.out	-78.4722	31_Uracil-Ethene_1.50_cpB.out	-414.354	31_Uracil-Ethene_1.00_monomerA.out	-414.354	31_Uracil-Ethene_1.00_monomerB.out	-78.4722		0.834426	0.884455	0.85944		0.918	0.937	0.951385		-0.0835738	-0.0335454	-0.0585596		-0.102574	-0.0525454	-0.0775596		-0.116959	-0.0669307	-0.0919448
31_Uracil-Ethene_2.00_dimer.out	-492.826	31_Uracil-Ethene_2.00_cpA.out	-78.4722	31_Uracil-Ethene_2.00_cpB.out	-414.354	31_Uracil-Ethene_1.00_monomerA.out	-414.354	31_Uracil-Ethene_1.00_monomerB.out	-78.4722		0.210348	0.22039	0.215369		0.251	0.257	0.261729		-0.040652	-0.0306103	-0.0356312		-0.046652	-0.0366103	-0.0416312		-0.0513815	-0.0413398	-0.0463606
32_Uracil-Ethyne_0.90_dimer.out	-491.579	32_Uracil-Ethyne_0.90_cpA.out	-77.221	32_Uracil-Ethyne_0.90_cpB.out	-414.354	32_Uracil-Ethyne_1.00_monomerA.out	-414.354	32_Uracil-Ethyne_1.00_monomerB.out	-77.2209		2.55049	2.83641	2.69345		2.587	2.628	2.70836		-0.0365137	0.249407	0.106447		-0.0775137	0.208407	0.0654466		-0.157872	0.128049	-0.0149114
32_Uracil-Ethyne_0.95_dimer.out	-491.58	32_Uracil-Ethyne_0.95_cpA.out	-77.221	32_Uracil-Ethyne_0.95_cpB.out	-414.354	32_Uracil-Ethyne_1.00_monomerA.out	-414.354	32_Uracil-Ethyne_1.00_monomerB.out	-77.2209		3.40763	3.64948	3.52855		3.387	3.442	3.50744		0.0206293	0.262475	0.141552		-0.0343707	0.207475	0.0865523		-0.0998141	0.142032	0.0211089
32_Uracil-Ethyne_1.00_dimer.out	-491.581	32_Uracil-Ethyne_1.00_cpA.out	-77.221	32_Uracil-Ethyne_1.00_cpB.out	-414.354	32_Uracil-Ethyne_1.00_monomerA.out	-414.354	32_Uracil-Ethyne_1.00_monomerB.out	-77.2209		3.63743	3.84223	3.73983		3.587	3.649	3.70204		0.0504256	0.255229	0.152827		-0.0115744	0.193229	0.0908272		-0.0646105	0.140193	0.037791
32_Uracil-Ethyne_1.05_dimer.out	-491.581	32_Uracil-Ethyne_1.05_cpA.out	-77.221	32_Uracil-Ethyne_1.05_cpB.out	-414.354	32_Uracil-Ethyne_1.00_monomerA.out	-414.354	32_Uracil-Ethyne_1.00_monomerB.out	-77.2209		3.52375	3.69778	3.61076		3.464	3.528	3.57104		0.0597477	0.233778	0.146763		-0.00425225	0.169778	0.0827628		-0.047297	0.126733	0.039718
32_Uracil-Ethyne_1.10_dimer.out	-491.58	32_Uracil-Ethyne_1.10_cpA.out	-77.221	32_Uracil-Ethyne_1.10_cpB.out	-414.354	32_Uracil-Ethyne_1.00_monomerA.out	-414.354	32_Uracil-Ethyne_1.00_monomerB.out	-77.2209		3.23919	3.38827	3.31373		3.183	3.247	3.28142		0.0561897	0.205266	0.130728		-0.00781032	0.141266	0.0667278		-0.0422342	0.106842	0.0323039
32_Uracil-Ethyne_1.25_dimer.out	-491.578	32_Uracil-Ethyne_1.25_cpA.out	-77.2209	32_Uracil-Ethyne_1.25_cpB.out	-414.354	32_Uracil-Ethyne_1.00_monomerA.out	-414.354	32_Uracil-Ethyne_1.00_monomerB.out	-77.2209		2.17245	2.26707	2.21976		2.159	2.213	2.23208		0.0134519	0.108068	0.0607598		-0.0405481	0.0540676	0.00675976		-0.0596257	0.0349901	-0.0123178
32_Uracil-Ethyne_1.50_dimer.out	-491.576	32_Uracil-Ethyne_1.50_cpA.out	-77.2209	32_Uracil-Ethyne_1.50_cpB.out	-414.354	32_Uracil-Ethyne_1.00_monomerA.out	-414.354	32_Uracil-Ethyne_1.00_monomerB.out	-77.2209		0.978702	1.02488	1.00179		1.012	1.045	1.05367		-0.0332976	0.0128804	-0.0102086		-0.0662976	-0.0201196	-0.0432086		-0.0749654	-0.0287874	-0.0518764
32_Uracil-Ethyne_2.00_dimer.out	-491.575	32_Uracil-Ethyne_2.00_cpA.out	-77.2209	32_Uracil-Ethyne_2.00_cpB.out	-414.354	32_Uracil-Ethyne_1.00_monomerA.out	-414.354	32_Uracil-Ethyne_1.00_monomerB.out	-77.2209		0.242862	0.254797	0.24883		0.264	0.275	0.277912		-0.0211383	-0.00920258	-0.0151704		-0.0321383	-0.0202026	-0.0261704		-0.0350504	-0.0231146	-0.0290825
33_Pyridine-Ethene_0.90_dimer.out	-326.417	33_Pyridine-Ethene_0.90_cpA.out	-78.4723	33_Pyridine-Ethene_0.90_cpB.out	-247.943	33_Pyridine-Ethene_1.00_monomerA.out	-247.943	33_Pyridine-Ethene_1.00_monomerB.out	-78.4722		0.815641	1.05226	0.933951		0.668	0.699	0.764551		0.147641	0.38426	0.265951		0.116641	0.35326	0.234951		0.0510902	0.287709	0.1694
33_Pyridine-Ethene_0.95_dimer.out	-326.418	33_Pyridine-Ethene_0.95_cpA.out	-78.4723	33_Pyridine-Ethene_0.95_cpB.out	-247.943	33_Pyridine-Ethene_1.00_monomerA.out	-247.943	33_Pyridine-Ethene_1.00_monomerB.out	-78.4722		1.59609	1.79378	1.69494		1.447	1.487	1.54094		0.14909	0.346783	0.247937		0.10909	0.306783	0.207937		0.055152	0.252845	0.153998
33_Pyridine-Ethene_1.00_dimer.out	-326.418	33_Pyridine-Ethene_1.00_cpA.out	-78.4723	33_Pyridine-Ethene_1.00_cpB.out	-247.943	33_Pyridine-Ethene_1.00_monomerA.out	-247.943	33_Pyridine-Ethene_1.00_monomerB.out	-78.4722		1.85476	2.01998	1.93737		1.721	1.764	1.8083		0.133758	0.298976	0.216367		0.0907576	0.255976	0.173367		0.0464608	0.21168	0.12907
33_Pyridine-Ethene_1.05_dimer.out	-326.418	33_Pyridine-Ethene_1.05_cpA.out	-78.4723	33_Pyridine-Ethene_1.05_cpB.out	-247.943	33_Pyridine-Ethene_1.00_monomerA.out	-247.943	33_Pyridine-Ethene_1.00_monomerB.out	-78.4722		1.82729	1.96563	1.89646		1.719	1.762	1.79853		0.108286	0.246627	0.177456		0.065286	0.203627	0.134456		0.0287588	0.167099	0.097929
33_Pyridine-Ethene_1.10_dimer.out	-326.418	33_Pyridine-Ethene_1.10_cpA.out	-78.4723	33_Pyridine-Ethene_1.10_cpB.out	-247.943	33_Pyridine-Ethene_1.00_monomerA.out	-247.943	33_Pyridine-Ethene_1.00_monomerB.out	-78.4722		1.65889	1.77505	1.71697		1.581	1.621	1.65103		0.0778901	0.194046	0.135968		0.0378901	0.154046	0.095968		0.00786367	0.12402	0.0659416
33_Pyridine-Ethene_1.25_dimer.out	-326.417	33_Pyridine-Ethene_1.25_cpA.out	-78.4722	33_Pyridine-Ethene_1.25_cpB.out	-247.943	33_Pyridine-Ethene_1.00_monomerA.out	-247.943	33_Pyridine-Ethene_1.00_monomerB.out	-78.4722		0.977668	1.0461	1.01189		0.985	1.013	1.02959		-0.00733206	0.0611022	0.0268851		-0.0353321	0.0331022	-0.00111493		-0.0519249	0.0165094	-0.0177077
33_Pyridine-Ethene_1.50_dimer.out	-326.416	33_Pyridine-Ethene_1.50_cpA.out	-78.4722	33_Pyridine-Ethene_1.50_cpB.out	-247.943	33_Pyridine-Ethene_1.00_monomerA.out	-247.943	33_Pyridine-Ethene_1.00_monomerB.out	-78.4722		0.28332	0.313584	0.298452		0.35	0.367	0.373598		-0.0666799	-0.0364158	-0.0515479		-0.0836799	-0.0534158	-0.0685479		-0.0902783	-0.0600143	-0.0751463
33_Pyridine-Ethene_2.00_dimer.out	-326.415	33_Pyridine-Ethene_2.00_cpA.out	-78.4722	33_Pyridine-Ethene_2.00_cpB.out	-247.943	33_Pyridine-Ethene_1.00_monomerA.out	-247.943	33_Pyridine-Ethene_1.00_monomerB.out	-78.4722		-3.95375e-05	0.00702568	0.00349307		0.042	0.047	0.0492694		-0.0420395	-0.0349743	-0.0385069		-0.0470395	-0.0399743	-0.0435069		-0.0493089	-0.0422437	-0.0457763
34_Pentane-Pentane_0.90_dimer.out	-394.964	34_Pentane-Pentane_0.90_cpA.out	-197.48	34_Pentane-Pentane_0.90_cpB.out	-197.48	34_Pentane-Pentane_1.00_monomerA.out	-197.48	34_Pentane-Pentane_1.00_monomerB.out	-197.48		2.07264	2.35276	2.2127		2.796	2.789	2.91887		-0.723362	-0.443241	-0.583302		-0.716362	-0.436241	-0.576302		-0.846231	-0.566109	-0.70617
34_Pentane-Pentane_0.95_dimer.out	-394.966	34_Pentane-Pentane_0.95_cpA.out	-197.48	34_Pentane-Pentane_0.95_cpB.out	-197.48	34_Pentane-Pentane_1.00_monomerA.out	-197.48	34_Pentane-Pentane_1.00_monomerB.out	-197.48		3.01841	3.25647	3.13744		3.564	3.569	3.67445		-0.545593	-0.30753	-0.426562		-0.550593	-0.31253	-0.431562		-0.656041	-0.417977	-0.537009
34_Pentane-Pentane_1.00_dimer.out	-394.966	34_Pentane-Pentane_1.00_cpA.out	-197.48	34_Pentane-Pentane_1.00_cpB.out	-197.48	34_Pentane-Pentane_1.00_monomerA.out	-197.48	34_Pentane-Pentane_1.00_monomerB.out	-197.48		3.29555	3.49337	3.39446		3.723	3.734	3.81979		-0.427445	-0.229631	-0.328538		-0.438445	-0.240631	-0.339538		-0.524234	-0.326419	-0.425327
34_Pentane-Pentane_1.05_dimer.out	-394.966	34_Pentane-Pentane_1.05_cpA.out	-197.48	34_Pentane-Pentane_1.05_cpB.out	-197.48	34_Pentane-Pentane_1.00_monomerA.out	-197.48	34_Pentane-Pentane_1.00_monomerB.out	-197.48		3.21811	3.38469	3.3014		3.567	3.581	3.65128		-0.348895	-0.182314	-0.265604		-0.362895	-0.196314	-0.279604		-0.433173	-0.266592	-0.349883
34_Pentane-Pentane_1.10_dimer.out	-394.965	34_Pentane-Pentane_1.10_cpA.out	-197.48	34_Pentane-Pentane_1.10_cpB.out	-197.48	34_Pentane-Pentane_1.00_monomerA.out	-197.48	34_Pentane-Pentane_1.00_monomerB.out	-197.48		2.96552	3.10923	3.03737		3.265	3.278	3.33681		-0.299483	-0.155771	-0.227627		-0.312483	-0.168771	-0.240627		-0.371293	-0.227582	-0.299437
34_Pentane-Pentane_1.25_dimer.out	-394.964	34_Pentane-Pentane_1.25_cpA.out	-197.48	34_Pentane-Pentane_1.25_cpB.out	-197.48	34_Pentane-Pentane_1.00_monomerA.out	-197.48	34_Pentane-Pentane_1.00_monomerB.out	-197.48		1.97988	2.06805	2.02396		2.211	2.223	2.25711		-0.23112	-0.142955	-0.187037		-0.24312	-0.154955	-0.199037		-0.277232	-0.189067	-0.233149
34_Pentane-Pentane_1.50_dimer.out	-394.962	34_Pentane-Pentane_1.50_cpA.out	-197.48	34_Pentane-Pentane_1.50_cpB.out	-197.48	34_Pentane-Pentane_1.00_monomerA.out	-197.48	34_Pentane-Pentane_1.00_monomerB.out	-197.48		0.878059	0.925276	0.901668		1.039	1.05	1.06638		-0.160941	-0.113724	-0.137332		-0.171941	-0.124724	-0.148332		-0.188324	-0.141107	-0.164716
34_Pentane-Pentane_2.00_dimer.out	-394.961	34_Pentane-Pentane_2.00_cpA.out	-197.48	34_Pentane-Pentane_2.00_cpB.out	-197.48	34_Pentane-Pentane_1.00_monomerA.out	-197.48	34_Pentane-Pentane_1.00_monomerB.out	-197.48		0.231952	0.246998	0.239475		0.263	0.273	0.278441		-0.0310483	-0.0160017	-0.023525		-0.0410483	-0.0260017	-0.033525		-0.0464889	-0.0314422	-0.0389655
35_Neopentane-Pentane_0.90_dimer.out	-394.968	35_Neopentane-Pentane_0.90_cpA.out	-197.486	35_Neopentane-Pentane_0.90_cpB.out	-197.48	35_Neopentane-Pentane_1.00_monomerA.out	-197.48	35_Neopentane-Pentane_1.00_monomerB.out	-197.486		1.30922	1.52023	1.41473		1.822	1.817	1.91344		-0.512777	-0.301771	-0.407274		-0.507777	-0.296771	-0.402274		-0.604216	-0.39321	-0.498713
35_Neopentane-Pentane_0.95_dimer.out	-394.97	35_Neopentane-Pentane_0.95_cpA.out	-197.486	35_Neopentane-Pentane_0.95_cpB.out	-197.48	35_Neopentane-Pentane_1.00_monomerA.out	-197.48	35_Neopentane-Pentane_1.00_monomerB.out	-197.486		2.07271	2.24324	2.15798		2.46	2.466	2.54217		-0.387289	-0.216761	-0.302025		-0.393289	-0.222761	-0.308025		-0.469457	-0.298928	-0.384192
35_Neopentane-Pentane_1.00_dimer.out	-394.97	35_Neopentane-Pentane_1.00_cpA.out	-197.486	35_Neopentane-Pentane_1.00_cpB.out	-197.48	35_Neopentane-Pentane_1.00_monomerA.out	-197.48	35_Neopentane-Pentane_1.00_monomerB.out	-197.486		2.27309	2.41432	2.3437		2.58	2.59	2.65134		-0.306913	-0.165678	-0.236295		-0.316913	-0.175678	-0.246295		-0.378253	-0.237018	-0.307635
35_Neopentane-Pentane_1.05_dimer.out	-394.97	35_Neopentane-Pentane_1.05_cpA.out	-197.486	35_Neopentane-Pentane_1.05_cpB.out	-197.48	35_Neopentane-Pentane_1.00_monomerA.out	-197.48	35_Neopentane-Pentane_1.00_monomerB.out	-197.486		2.20189	2.31955	2.26072		2.456	2.467	2.51754		-0.254114	-0.136452	-0.195283		-0.265114	-0.147452	-0.206283		-0.315649	-0.197988	-0.256819
35_Neopentane-Pentane_1.10_dimer.out	-394.969	35_Neopentane-Pentane_1.10_cpA.out	-197.486	35_Neopentane-Pentane_1.10_cpB.out	-197.48	35_Neopentane-Pentane_1.00_monomerA.out	-197.48	35_Neopentane-Pentane_1.00_monomerB.out	-197.486		2.009	2.10806	2.05853		2.228	2.24	2.28186		-0.219005	-0.119936	-0.16947		-0.231005	-0.131936	-0.18147		-0.272863	-0.173794	-0.223329
35_Neopentane-Pentane_1.25_dimer.out	-394.968	35_Neopentane-Pentane_1.25_cpA.out	-197.486	35_Neopentane-Pentane_1.25_cpB.out	-197.48	35_Neopentane-Pentane_1.00_monomerA.out	-197.48	35_Neopentane-Pentane_1.00_monomerB.out	-197.486		1.31428	1.37518	1.34473		1.479	1.491	1.51579		-0.164716	-0.103816	-0.134266		-0.176716	-0.115816	-0.146266		-0.201508	-0.140608	-0.171058
35_Neopentane-Pentane_1.50_dimer.out	-394.967	35_Neopentane-Pentane_1.50_cpA.out	-197.486	35_Neopentane-Pentane_1.50_cpB.out	-197.48	35_Neopentane-Pentane_1.00_monomerA.out	-197.48	35_Neopentane-Pentane_1.00_monomerB.out	-197.486		0.586453	0.618658	0.602556		0.69	0.699	0.711231		-0.103547	-0.0713415	-0.0874441		-0.112547	-0.0803415	-0.0964441		-0.124778	-0.0925724	-0.108675
35_Neopentane-Pentane_2.00_dimer.out	-394.966	35_Neopentane-Pentane_2.00_cpA.out	-197.486	35_Neopentane-Pentane_2.00_cpB.out	-197.48	35_Neopentane-Pentane_1.00_monomerA.out	-197.48	35_Neopentane-Pentane_1.00_monomerB.out	-197.486		0.167113	0.176467	0.17179		0.185	0.187	0.191308		-0.017887	-0.008533	-0.01321		-0.019887	-0.010533	-0.01521		-0.0241951	-0.0148411	-0.0195181
36_Neopentane-Neopentane_0.90_dimer.out	-394.974	36_Neopentane-Neopentane_0.90_cpA.out	-197.486	36_Neopentane-Neopentane_0.90_cpB.out	-197.486	36_Neopentane-Neopentane_1.00_monomerA.out	-197.486	36_Neopentane-Neopentane_1.00_monomerB.out	-197.486		1.15455	1.29448	1.22451		1.425	1.428	1.48419		-0.270452	-0.13052	-0.200486		-0.273452	-0.13352	-0.203486		-0.329644	-0.189713	-0.259678
36_Neopentane-Neopentane_0.95_dimer.out	-394.974	36_Neopentane-Neopentane_0.95_cpA.out	-197.486	36_Neopentane-Neopentane_0.95_cpB.out	-197.486	36_Neopentane-Neopentane_1.00_monomerA.out	-197.486	36_Neopentane-Neopentane_1.00_monomerB.out	-197.486		1.48289	1.59771	1.5403		1.705	1.713	1.75788		-0.222106	-0.107285	-0.164696		-0.230106	-0.115285	-0.172696		-0.274987	-0.160167	-0.217577
36_Neopentane-Neopentane_1.00_dimer.out	-394.974	36_Neopentane-Neopentane_1.00_cpA.out	-197.486	36_Neopentane-Neopentane_1.00_cpB.out	-197.486	36_Neopentane-Neopentane_1.00_monomerA.out	-197.486	36_Neopentane-Neopentane_1.00_monomerB.out	-197.486		1.55415	1.65106	1.6026		1.742	1.753	1.79011		-0.187852	-0.0909429	-0.139397		-0.198852	-0.101943	-0.150397		-0.235961	-0.139052	-0.187507
36_Neopentane-Neopentane_1.05_dimer.out	-394.974	36_Neopentane-Neopentane_1.05_cpA.out	-197.486	36_Neopentane-Neopentane_1.05_cpB.out	-197.486	36_Neopentane-Neopentane_1.00_monomerA.out	-197.486	36_Neopentane-Neopentane_1.00_monomerB.out	-197.486		1.49065	1.57299	1.53182		1.625	1.667	1.6984		-0.134352	-0.0520052	-0.0931786		-0.176352	-0.0940052	-0.135179		-0.207751	-0.125405	-0.166578
36_Neopentane-Neopentane_1.10_dimer.out	-394.974	36_Neopentane-Neopentane_1.10_cpA.out	-197.486	36_Neopentane-Neopentane_1.10_cpB.out	-197.486	36_Neopentane-Neopentane_1.00_monomerA.out	-197.486	36_Neopentane-Neopentane_1.00_monomerB.out	-197.486		1.3628	1.43207	1.39743		1.502	1.524	1.55092		-0.139201	-0.0699295	-0.104565		-0.161201	-0.0919295	-0.126565		-0.188121	-0.118849	-0.153485
36_Neopentane-Neopentane_1.25_dimer.out	-394.973	36_Neopentane-Neopentane_1.25_cpA.out	-197.486	36_Neopentane-Neopentane_1.25_cpB.out	-197.486	36_Neopentane-Neopentane_1.00_monomerA.out	-197.486	36_Neopentane-Neopentane_1.00_monomerB.out	-197.486		0.913874	0.955071	0.934473		1.018	1.042	1.06046		-0.104126	-0.0629292	-0.0835275		-0.128126	-0.0869292	-0.107527		-0.146585	-0.105388	-0.125986
36_Neopentane-Neopentane_1.50_dimer.out	-394.972	36_Neopentane-Neopentane_1.50_cpA.out	-197.486	36_Neopentane-Neopentane_1.50_cpB.out	-197.486	36_Neopentane-Neopentane_1.00_monomerA.out	-197.486	36_Neopentane-Neopentane_1.00_monomerB.out	-197.486		0.429041	0.450709	0.439875		0.497	0.504	0.512297		-0.067959	-0.0462908	-0.0571249		-0.074959	-0.0532908	-0.0641249		-0.0832564	-0.0615882	-0.0724223
36_Neopentane-Neopentane_2.00_dimer.out	-394.972	36_Neopentane-Neopentane_2.00_cpA.out	-197.486	36_Neopentane-Neopentane_2.00_cpB.out	-197.486	36_Neopentane-Neopentane_1.00_monomerA.out	-197.486	36_Neopentane-Neopentane_1.00_monomerB.out	-197.486		0.132424	0.139215	0.13582		0.132	0.136	0.138908		0.000423879	0.00721513	0.0038195		-0.00357612	0.00321513	-0.000180496		-0.00648461	0.000306642	-0.00308898
37_Cyclopentane-Neopentane_0.90_dimer.out	-393.76	37_Cyclopentane-Neopentane_0.90_cpA.out	-197.486	37_Cyclopentane-Neopentane_0.90_cpB.out	-196.272	37_Cyclopentane-Neopentane_1.00_monomerA.out	-196.272	37_Cyclopentane-Neopentane_1.00_monomerB.out	-197.486		1.08638	1.29293	1.18965		1.576	1.574	1.66886		-0.489625	-0.283067	-0.386346		-0.487625	-0.281067	-0.384346		-0.582481	-0.375923	-0.479202
37_Cyclopentane-Neopentane_0.95_dimer.out	-393.761	37_Cyclopentane-Neopentane_0.95_cpA.out	-197.486	37_Cyclopentane-Neopentane_0.95_cpB.out	-196.272	37_Cyclopentane-Neopentane_1.00_monomerA.out	-196.272	37_Cyclopentane-Neopentane_1.00_monomerB.out	-197.486		1.84667	2.01621	1.93144		2.217	2.225	2.29906		-0.370328	-0.20079	-0.285559		-0.378328	-0.20879	-0.293559		-0.452392	-0.282854	-0.367623
37_Cyclopentane-Neopentane_1.00_dimer.out	-393.761	37_Cyclopentane-Neopentane_1.00_cpA.out	-197.486	37_Cyclopentane-Neopentane_1.00_cpB.out	-196.272	37_Cyclopentane-Neopentane_1.00_monomerA.out	-196.272	37_Cyclopentane-Neopentane_1.00_monomerB.out	-197.486		2.07921	2.21904	2.14912		2.373	2.384	2.44277		-0.293792	-0.153961	-0.223876		-0.304792	-0.164961	-0.234876		-0.363567	-0.223735	-0.293651
37_Cyclopentane-Neopentane_1.05_dimer.out	-393.761	37_Cyclopentane-Neopentane_1.05_cpA.out	-197.486	37_Cyclopentane-Neopentane_1.05_cpB.out	-196.272	37_Cyclopentane-Neopentane_1.00_monomerA.out	-196.272	37_Cyclopentane-Neopentane_1.00_monomerB.out	-197.486		2.0508	2.1688	2.1098		2.295	2.306	2.35362		-0.244204	-0.126203	-0.185203		-0.255204	-0.137203	-0.196203		-0.302821	-0.18482	-0.243821
37_Cyclopentane-Neopentane_1.10_dimer.out	-393.761	37_Cyclopentane-Neopentane_1.10_cpA.out	-197.486	37_Cyclopentane-Neopentane_1.10_cpB.out	-196.272	37_Cyclopentane-Neopentane_1.00_monomerA.out	-196.272	37_Cyclopentane-Neopentane_1.00_monomerB.out	-197.486		1.90016	1.99996	1.95006		2.111	2.122	2.16092		-0.210845	-0.111045	-0.160945		-0.221845	-0.122045	-0.171945		-0.260769	-0.16097	-0.210869
37_Cyclopentane-Neopentane_1.25_dimer.out	-393.76	37_Cyclopentane-Neopentane_1.25_cpA.out	-197.486	37_Cyclopentane-Neopentane_1.25_cpB.out	-196.272	37_Cyclopentane-Neopentane_1.00_monomerA.out	-196.272	37_Cyclopentane-Neopentane_1.00_monomerB.out	-197.486		1.29077	1.35244	1.32161		1.449	1.458	1.48153		-0.158227	-0.0965621	-0.127395		-0.167227	-0.105562	-0.136395		-0.190755	-0.129091	-0.159923
37_Cyclopentane-Neopentane_1.50_dimer.out	-393.759	37_Cyclopentane-Neopentane_1.50_cpA.out	-197.486	37_Cyclopentane-Neopentane_1.50_cpB.out	-196.272	37_Cyclopentane-Neopentane_1.00_monomerA.out	-196.272	37_Cyclopentane-Neopentane_1.00_monomerB.out	-197.486		0.598351	0.631457	0.614904		0.699	0.705	0.71648		-0.100649	-0.0675428	-0.0840959		-0.106649	-0.0735428	-0.0900959		-0.118129	-0.0850228	-0.101576
37_Cyclopentane-Neopentane_2.00_dimer.out	-393.758	37_Cyclopentane-Neopentane_2.00_cpA.out	-197.486	37_Cyclopentane-Neopentane_2.00_cpB.out	-196.272	37_Cyclopentane-Neopentane_1.00_monomerA.out	-196.272	37_Cyclopentane-Neopentane_1.00_monomerB.out	-197.486		0.172839	0.182112	0.177476		0.189	0.191	0.194453		-0.0161608	-0.00688821	-0.0115245		-0.0181608	-0.00888821	-0.0135245		-0.0216141	-0.0123415	-0.0169778
38_Cyclopentane-Cyclopentane_0.90_dimer.out	-392.547	38_Cyclopentane-Cyclopentane_0.90_cpA.out	-196.272	38_Cyclopentane-Cyclopentane_0.90_cpB.out	-196.272	38_Cyclopentane-Cyclopentane_1.00_monomerA.out	-196.272	38_Cyclopentane-Cyclopentane_1.00_monomerB.out	-196.272		1.59619	1.83072	1.71346		2.198	2.199	2.30091		-0.601814	-0.367275	-0.484544		-0.602814	-0.368275	-0.485544		-0.704728	-0.470189	-0.587459
38_Cyclopentane-Cyclopentane_0.95_dimer.out	-392.548	38_Cyclopentane-Cyclopentane_0.95_cpA.out	-196.272	38_Cyclopentane-Cyclopentane_0.95_cpB.out	-196.272	38_Cyclopentane-Cyclopentane_1.00_monomerA.out	-196.272	38_Cyclopentane-Cyclopentane_1.00_monomerB.out	-196.272		2.3272	2.5275	2.42735		2.8	2.811	2.89424		-0.472805	-0.272504	-0.372655		-0.483805	-0.283504	-0.383655		-0.56705	-0.366749	-0.466899
38_Cyclopentane-Cyclopentane_1.00_dimer.out	-392.549	38_Cyclopentane-Cyclopentane_1.00_cpA.out	-196.272	38_Cyclopentane-Cyclopentane_1.00_cpB.out	-196.272	38_Cyclopentane-Cyclopentane_1.00_monomerA.out	-196.272	38_Cyclopentane-Cyclopentane_1.00_monomerB.out	-196.272		2.58138	2.75086	2.66612		2.956	2.971	3.03815		-0.374621	-0.205137	-0.289879		-0.389621	-0.220137	-0.304879		-0.456772	-0.287288	-0.37203
38_Cyclopentane-Cyclopentane_1.05_dimer.out	-392.549	38_Cyclopentane-Cyclopentane_1.05_cpA.out	-196.272	38_Cyclopentane-Cyclopentane_1.05_cpB.out	-196.272	38_Cyclopentane-Cyclopentane_1.00_monomerA.out	-196.272	38_Cyclopentane-Cyclopentane_1.00_monomerB.out	-196.272		2.5155	2.65832	2.58691		2.824	2.839	2.8931		-0.308503	-0.165679	-0.237091		-0.323503	-0.180679	-0.252091		-0.377602	-0.234778	-0.30619
38_Cyclopentane-Cyclopentane_1.10_dimer.out	-392.548	38_Cyclopentane-Cyclopentane_1.10_cpA.out	-196.272	38_Cyclopentane-Cyclopentane_1.10_cpB.out	-196.272	38_Cyclopentane-Cyclopentane_1.00_monomerA.out	-196.272	38_Cyclopentane-Cyclopentane_1.00_monomerB.out	-196.272		2.29823	2.41917	2.3587		2.563	2.578	2.62129		-0.264769	-0.143828	-0.204298		-0.279769	-0.158828	-0.219298		-0.323059	-0.202118	-0.262589
38_Cyclopentane-Cyclopentane_1.25_dimer.out	-392.547	38_Cyclopentane-Cyclopentane_1.25_cpA.out	-196.272	38_Cyclopentane-Cyclopentane_1.25_cpB.out	-196.272	38_Cyclopentane-Cyclopentane_1.00_monomerA.out	-196.272	38_Cyclopentane-Cyclopentane_1.00_monomerB.out	-196.272		1.49529	1.57027	1.53278		1.693	1.705	1.73072		-0.197712	-0.122729	-0.160221		-0.209712	-0.134729	-0.172221		-0.235431	-0.160448	-0.197939
38_Cyclopentane-Cyclopentane_1.50_dimer.out	-392.545	38_Cyclopentane-Cyclopentane_1.50_cpA.out	-196.272	38_Cyclopentane-Cyclopentane_1.50_cpB.out	-196.272	38_Cyclopentane-Cyclopentane_1.00_monomerA.out	-196.272	38_Cyclopentane-Cyclopentane_1.00_monomerB.out	-196.272		0.655678	0.697998	0.676838		0.78	0.791	0.803855		-0.124322	-0.0820022	-0.103162		-0.135322	-0.0930022	-0.114162		-0.148178	-0.105857	-0.127017
38_Cyclopentane-Cyclopentane_2.00_dimer.out	-392.545	38_Cyclopentane-Cyclopentane_2.00_cpA.out	-196.272	38_Cyclopentane-Cyclopentane_2.00_cpB.out	-196.272	38_Cyclopentane-Cyclopentane_1.00_monomerA.out	-196.272	38_Cyclopentane-Cyclopentane_1.00_monomerB.out	-196.272		0.181119	0.194922	0.188021		0.201	0.207	0.21123		-0.0198807	-0.0060779	-0.0129793		-0.0258807	-0.0120779	-0.0189793		-0.0301104	-0.0163076	-0.023209
39_Benzene-Cyclopentane_0.90_dimer.out	-428.188	39_Benzene-Cyclopentane_0.90_cpA.out	-196.272	39_Benzene-Cyclopentane_0.90_cpB.out	-231.913	39_Benzene-Cyclopentane_1.00_monomerA.out	-231.913	39_Benzene-Cyclopentane_1.00_monomerB.out	-196.272		1.57016	1.91884	1.7445		1.969	2.013	2.14254		-0.398836	-0.0501636	-0.2245		-0.442836	-0.0941636	-0.2685		-0.57238	-0.223707	-0.398044
39_Benzene-Cyclopentane_0.95_dimer.out	-428.19	39_Benzene-Cyclopentane_0.95_cpA.out	-196.272	39_Benzene-Cyclopentane_0.95_cpB.out	-231.913	39_Benzene-Cyclopentane_1.00_monomerA.out	-231.913	39_Benzene-Cyclopentane_1.00_monomerB.out	-196.272		2.78571	3.07806	2.93189		3.081	3.135	3.24254		-0.295287	-0.00293586	-0.149112		-0.349287	-0.0569359	-0.203112		-0.45683	-0.164478	-0.310654
39_Benzene-Cyclopentane_1.00_dimer.out	-428.19	39_Benzene-Cyclopentane_1.00_cpA.out	-196.272	39_Benzene-Cyclopentane_1.00_cpB.out	-231.913	39_Benzene-Cyclopentane_1.00_monomerA.out	-231.913	39_Benzene-Cyclopentane_1.00_monomerB.out	-196.272		3.2057	3.45075	3.32822		3.438	3.496	3.58357		-0.232298	0.012745	-0.109777		-0.290298	-0.045255	-0.167777		-0.377869	-0.132826	-0.255348
39_Benzene-Cyclopentane_1.05_dimer.out	-428.19	39_Benzene-Cyclopentane_1.05_cpA.out	-196.272	39_Benzene-Cyclopentane_1.05_cpB.out	-231.913	39_Benzene-Cyclopentane_1.00_monomerA.out	-231.913	39_Benzene-Cyclopentane_1.00_monomerB.out	-196.272		3.16587	3.36981	3.26784		3.364	3.42	3.49181		-0.198132	0.00581402	-0.0961592		-0.254132	-0.050186	-0.152159		-0.325947	-0.122001	-0.223974
39_Benzene-Cyclopentane_1.10_dimer.out	-428.19	39_Benzene-Cyclopentane_1.10_cpA.out	-196.272	39_Benzene-Cyclopentane_1.10_cpB.out	-231.913	39_Benzene-Cyclopentane_1.00_monomerA.out	-231.913	39_Benzene-Cyclopentane_1.00_monomerB.out	-196.272		2.89888	3.07151	2.98519		3.083	3.135	3.19344		-0.184117	-0.011494	-0.0978057		-0.236117	-0.063494	-0.149806		-0.294556	-0.121932	-0.208244
39_Benzene-Cyclopentane_1.25_dimer.out	-428.188	39_Benzene-Cyclopentane_1.25_cpA.out	-196.272	39_Benzene-Cyclopentane_1.25_cpB.out	-231.913	39_Benzene-Cyclopentane_1.00_monomerA.out	-231.913	39_Benzene-Cyclopentane_1.00_monomerB.out	-196.272		1.84003	1.94527	1.89265		2.026	2.062	2.09435		-0.185969	-0.0807328	-0.133351		-0.221969	-0.116733	-0.169351		-0.254319	-0.149083	-0.201701
39_Benzene-Cyclopentane_1.50_dimer.out	-428.186	39_Benzene-Cyclopentane_1.50_cpA.out	-196.272	39_Benzene-Cyclopentane_1.50_cpB.out	-231.913	39_Benzene-Cyclopentane_1.00_monomerA.out	-231.913	39_Benzene-Cyclopentane_1.00_monomerB.out	-196.272		0.713516	0.763426	0.738471		0.884	0.903	0.91841		-0.170484	-0.120574	-0.145529		-0.189484	-0.139574	-0.164529		-0.204895	-0.154985	-0.17994
39_Benzene-Cyclopentane_2.00_dimer.out	-428.185	39_Benzene-Cyclopentane_2.00_cpA.out	-196.272	39_Benzene-Cyclopentane_2.00_cpB.out	-231.913	39_Benzene-Cyclopentane_1.00_monomerA.out	-231.913	39_Benzene-Cyclopentane_1.00_monomerB.out	-196.272		0.117684	0.130794	0.124239		0.189	0.194	0.199481		-0.0713158	-0.0582057	-0.0647607		-0.0763158	-0.0632057	-0.0697607		-0.0817969	-0.0686869	-0.0752419
40_Benzene-Neopentane_0.90_dimer.out	-429.401	40_Benzene-Neopentane_0.90_cpA.out	-197.486	40_Benzene-Neopentane_0.90_cpB.out	-231.913	40_Benzene-Neopentane_1.00_monomerA.out	-231.913	40_Benzene-Neopentane_1.00_monomerB.out	-197.486		1.40625	1.68261	1.54443		1.712	1.753	1.85878		-0.305749	-0.0293903	-0.16757		-0.346749	-0.0703903	-0.20857		-0.452525	-0.176166	-0.314345
40_Benzene-Neopentane_0.95_dimer.out	-429.402	40_Benzene-Neopentane_0.95_cpA.out	-197.486	40_Benzene-Neopentane_0.95_cpB.out	-231.913	40_Benzene-Neopentane_1.00_monomerA.out	-231.913	40_Benzene-Neopentane_1.00_monomerB.out	-197.486		2.30896	2.53834	2.42365		2.549	2.597	2.68281		-0.240036	-0.0106611	-0.125349		-0.288036	-0.0586611	-0.173349		-0.373846	-0.144471	-0.259158
40_Benzene-Neopentane_1.00_dimer.out	-429.403	40_Benzene-Neopentane_1.00_cpA.out	-197.486	40_Benzene-Neopentane_1.00_cpB.out	-231.913	40_Benzene-Neopentane_1.00_monomerA.out	-231.913	40_Benzene-Neopentane_1.00_monomerB.out	-197.486		2.58644	2.77631	2.68137		2.791	2.839	2.90941		-0.204563	-0.0146874	-0.109625		-0.252563	-0.0626874	-0.157625		-0.322976	-0.1331	-0.228038
40_Benzene-Neopentane_1.05_dimer.out	-429.403	40_Benzene-Neopentane_1.05_cpA.out	-197.486	40_Benzene-Neopentane_1.05_cpB.out	-231.913	40_Benzene-Neopentane_1.00_monomerA.out	-231.913	40_Benzene-Neopentane_1.00_monomerB.out	-197.486		2.53361	2.69201	2.61281		2.721	2.767	2.82401		-0.18739	-0.0289941	-0.108192		-0.23339	-0.0749941	-0.154192		-0.2904	-0.132004	-0.211202
40_Benzene-Neopentane_1.10_dimer.out	-429.402	40_Benzene-Neopentane_1.10_cpA.out	-197.486	40_Benzene-Neopentane_1.10_cpB.out	-231.913	40_Benzene-Neopentane_1.00_monomerA.out	-231.913	40_Benzene-Neopentane_1.00_monomerB.out	-197.486		2.32104	2.45415	2.3876		2.502	2.544	2.59065		-0.180958	-0.0478496	-0.114404		-0.222958	-0.0898496	-0.156404		-0.269605	-0.136497	-0.203051
40_Benzene-Neopentane_1.25_dimer.out	-429.401	40_Benzene-Neopentane_1.25_cpA.out	-197.486	40_Benzene-Neopentane_1.25_cpB.out	-231.913	40_Benzene-Neopentane_1.00_monomerA.out	-231.913	40_Benzene-Neopentane_1.00_monomerB.out	-197.486		1.48765	1.56846	1.52806		1.674	1.703	1.72948		-0.186348	-0.105536	-0.145942		-0.215348	-0.134536	-0.174942		-0.241823	-0.161011	-0.201417
40_Benzene-Neopentane_1.50_dimer.out	-429.399	40_Benzene-Neopentane_1.50_cpA.out	-197.486	40_Benzene-Neopentane_1.50_cpB.out	-231.913	40_Benzene-Neopentane_1.00_monomerA.out	-231.913	40_Benzene-Neopentane_1.00_monomerB.out	-197.486		0.590028	0.627038	0.608533		0.762	0.773	0.786207		-0.171972	-0.134962	-0.153467		-0.182972	-0.145962	-0.164467		-0.196179	-0.159168	-0.177674
40_Benzene-Neopentane_2.00_dimer.out	-429.398	40_Benzene-Neopentane_2.00_cpA.out	-197.486	40_Benzene-Neopentane_2.00_cpB.out	-231.913	40_Benzene-Neopentane_1.00_monomerA.out	-231.913	40_Benzene-Neopentane_1.00_monomerB.out	-197.486		0.114127	0.125253	0.11969		0.187	0.191	0.195601		-0.0728734	-0.0617469	-0.0673101		-0.0768734	-0.0657469	-0.0713101		-0.0814747	-0.0703483	-0.0759115
41_Uracil-Pentane_0.90_dimer.out	-611.839	41_Uracil-Pentane_0.90_cpA.out	-197.48	41_Uracil-Pentane_0.90_cpB.out	-414.354	41_Uracil-Pentane_1.00_monomerA.out	-414.354	41_Uracil-Pentane_1.00_monomerB.out	-197.48		2.69546	3.1776	2.93653		3.679	3.732	3.93232		-0.983543	-0.501395	-0.742469		-1.03654	-0.554395	-0.795469		-1.23686	-0.754716	-0.99579
41_Uracil-Pentane_0.95_dimer.out	-611.841	41_Uracil-Pentane_0.95_cpA.out	-197.48	41_Uracil-Pentane_0.95_cpB.out	-414.354	41_Uracil-Pentane_1.00_monomerA.out	-414.354	41_Uracil-Pentane_1.00_monomerB.out	-197.48		3.78134	4.19464	3.98799		4.56	4.624	4.79242		-0.778664	-0.365359	-0.572011		-0.842664	-0.429359	-0.636011		-1.01108	-0.597776	-0.804428
41_Uracil-Pentane_1.00_dimer.out	-611.841	41_Uracil-Pentane_1.00_cpA.out	-197.48	41_Uracil-Pentane_1.00_cpB.out	-414.354	41_Uracil-Pentane_1.00_monomerA.out	-414.354	41_Uracil-Pentane_1.00_monomerB.out	-197.48		4.08722	4.43891	4.26307		4.724	4.792	4.93376		-0.636775	-0.285087	-0.460931		-0.704775	-0.353087	-0.528931		-0.846534	-0.494846	-0.67069
41_Uracil-Pentane_1.05_dimer.out	-611.841	41_Uracil-Pentane_1.05_cpA.out	-197.48	41_Uracil-Pentane_1.05_cpB.out	-414.354	41_Uracil-Pentane_1.00_monomerA.out	-414.354	41_Uracil-Pentane_1.00_monomerB.out	-197.48		3.95938	4.25838	4.10888		4.502	4.569	4.68928		-0.542625	-0.243624	-0.393125		-0.609625	-0.310624	-0.460125		-0.729905	-0.430904	-0.580405
41_Uracil-Pentane_1.10_dimer.out	-611.84	41_Uracil-Pentane_1.10_cpA.out	-197.48	41_Uracil-Pentane_1.10_cpB.out	-414.354	41_Uracil-Pentane_1.00_monomerA.out	-414.354	41_Uracil-Pentane_1.00_monomerB.out	-197.48		3.52906	3.77715	3.6531		3.999	4.064	4.1628		-0.469942	-0.221852	-0.345897		-0.534942	-0.286852	-0.410897		-0.633744	-0.385655	-0.5097
41_Uracil-Pentane_1.25_dimer.out	-611.838	41_Uracil-Pentane_1.25_cpA.out	-197.48	41_Uracil-Pentane_1.25_cpB.out	-414.354	41_Uracil-Pentane_1.00_monomerA.out	-414.354	41_Uracil-Pentane_1.00_monomerB.out	-197.48		2.01467	2.15765	2.08616		2.402	2.451	2.50794		-0.387327	-0.244355	-0.315841		-0.436327	-0.293355	-0.364841		-0.493268	-0.350295	-0.421781
41_Uracil-Pentane_1.50_dimer.out	-611.835	41_Uracil-Pentane_1.50_cpA.out	-197.48	41_Uracil-Pentane_1.50_cpB.out	-414.354	41_Uracil-Pentane_1.00_monomerA.out	-414.354	41_Uracil-Pentane_1.00_monomerB.out	-197.48		0.6601	0.725686	0.692893		0.961	0.986	1.01178		-0.3009	-0.235314	-0.268107		-0.3259	-0.260314	-0.293107		-0.351681	-0.286094	-0.318888
41_Uracil-Pentane_2.00_dimer.out	-611.834	41_Uracil-Pentane_2.00_cpA.out	-197.48	41_Uracil-Pentane_2.00_cpB.out	-414.354	41_Uracil-Pentane_1.00_monomerA.out	-414.354	41_Uracil-Pentane_1.00_monomerB.out	-197.48		0.0628224	0.0796219	0.0712222		0.212	0.22	0.227902		-0.149178	-0.132378	-0.140778		-0.157178	-0.140378	-0.148778		-0.165079	-0.14828	-0.15668
42_Uracil-Cyclopentane_0.90_dimer.out	-610.63	42_Uracil-Cyclopentane_0.90_cpA.out	-196.272	42_Uracil-Cyclopentane_0.90_cpB.out	-414.354	42_Uracil-Cyclopentane_1.00_monomerA.out	-414.354	42_Uracil-Cyclopentane_1.00_monomerB.out	-196.272		1.96377	2.41421	2.18899		2.9	2.963	3.14593		-0.93623	-0.485794	-0.711012		-0.99923	-0.548794	-0.774012		-1.18216	-0.731721	-0.956939
42_Uracil-Cyclopentane_0.95_dimer.out	-610.632	42_Uracil-Cyclopentane_0.95_cpA.out	-196.272	42_Uracil-Cyclopentane_0.95_cpB.out	-414.354	42_Uracil-Cyclopentane_1.00_monomerA.out	-414.354	42_Uracil-Cyclopentane_1.00_monomerB.out	-196.272		3.09412	3.47343	3.28378		3.836	3.91	4.06178		-0.74188	-0.362569	-0.552224		-0.81588	-0.436569	-0.626224		-0.967658	-0.588348	-0.778003
42_Uracil-Cyclopentane_1.00_dimer.out	-610.632	42_Uracil-Cyclopentane_1.00_cpA.out	-196.272	42_Uracil-Cyclopentane_1.00_cpB.out	-414.354	42_Uracil-Cyclopentane_1.00_monomerA.out	-414.354	42_Uracil-Cyclopentane_1.00_monomerB.out	-196.272		3.4068	3.72762	3.56721		4.019	4.094	4.22087		-0.612199	-0.291383	-0.451791		-0.687199	-0.366383	-0.526791		-0.814064	-0.493248	-0.653656
42_Uracil-Cyclopentane_1.05_dimer.out	-610.632	42_Uracil-Cyclopentane_1.05_cpA.out	-196.272	42_Uracil-Cyclopentane_1.05_cpB.out	-414.354	42_Uracil-Cyclopentane_1.00_monomerA.out	-414.354	42_Uracil-Cyclopentane_1.00_monomerB.out	-196.272		3.29617	3.56955	3.43286		3.823	3.895	4.00123		-0.52683	-0.25345	-0.39014		-0.59883	-0.32545	-0.46214		-0.705057	-0.431677	-0.568367
42_Uracil-Cyclopentane_1.10_dimer.out	-610.631	42_Uracil-Cyclopentane_1.10_cpA.out	-196.272	42_Uracil-Cyclopentane_1.10_cpB.out	-414.354	42_Uracil-Cyclopentane_1.00_monomerA.out	-414.354	42_Uracil-Cyclopentane_1.00_monomerB.out	-196.272		2.98657	3.21989	3.10323		3.459	3.526	3.61506		-0.472434	-0.239108	-0.355771		-0.539434	-0.306108	-0.422771		-0.628498	-0.395172	-0.511835
42_Uracil-Cyclopentane_1.25_dimer.out	-610.629	42_Uracil-Cyclopentane_1.25_cpA.out	-196.272	42_Uracil-Cyclopentane_1.25_cpB.out	-414.354	42_Uracil-Cyclopentane_1.00_monomerA.out	-414.354	42_Uracil-Cyclopentane_1.00_monomerB.out	-196.272		1.8518	2.00067	1.92623		2.249	2.298	2.35201		-0.397204	-0.248333	-0.322768		-0.446204	-0.297333	-0.371768		-0.500219	-0.351347	-0.425783
42_Uracil-Cyclopentane_1.50_dimer.out	-610.627	42_Uracil-Cyclopentane_1.50_cpA.out	-196.272	42_Uracil-Cyclopentane_1.50_cpB.out	-414.354	42_Uracil-Cyclopentane_1.00_monomerA.out	-414.354	42_Uracil-Cyclopentane_1.00_monomerB.out	-196.272		0.675907	0.748695	0.712301		1	1.026	1.05203		-0.324093	-0.251305	-0.287699		-0.350093	-0.277305	-0.313699		-0.376127	-0.303339	-0.339733
42_Uracil-Cyclopentane_2.00_dimer.out	-610.626	42_Uracil-Cyclopentane_2.00_cpA.out	-196.272	42_Uracil-Cyclopentane_2.00_cpB.out	-414.354	42_Uracil-Cyclopentane_1.00_monomerA.out	-414.354	42_Uracil-Cyclopentane_1.00_monomerB.out	-196.272		0.0657949	0.088203	0.076999		0.246	0.253	0.262721		-0.180205	-0.157797	-0.169001		-0.187205	-0.164797	-0.176001		-0.196926	-0.174518	-0.185722
43_Uracil-Neopentane_0.90_dimer.out	-611.843	43_Uracil-Neopentane_0.90_cpA.out	-197.486	43_Uracil-Neopentane_0.90_cpB.out	-414.354	43_Uracil-Neopentane_1.00_monomerA.out	-414.354	43_Uracil-Neopentane_1.00_monomerB.out	-197.486		2.00379	2.37011	2.18695		2.756	2.807	2.95433		-0.752209	-0.385895	-0.569052		-0.803209	-0.436895	-0.620052		-0.950544	-0.584229	-0.767386
43_Uracil-Neopentane_0.95_dimer.out	-611.845	43_Uracil-Neopentane_0.95_cpA.out	-197.486	43_Uracil-Neopentane_0.95_cpB.out	-414.354	43_Uracil-Neopentane_1.00_monomerA.out	-414.354	43_Uracil-Neopentane_1.00_monomerB.out	-197.486		2.90179	3.21201	3.0569		3.5	3.56	3.68368		-0.598206	-0.287985	-0.443095		-0.658206	-0.347985	-0.503095		-0.781882	-0.471661	-0.626771
43_Uracil-Neopentane_1.00_dimer.out	-611.845	43_Uracil-Neopentane_1.00_cpA.out	-197.486	43_Uracil-Neopentane_1.00_cpB.out	-414.354	43_Uracil-Neopentane_1.00_monomerA.out	-414.354	43_Uracil-Neopentane_1.00_monomerB.out	-197.486		3.11574	3.37659	3.24616		3.613	3.678	3.78166		-0.497258	-0.236413	-0.366835		-0.562258	-0.301413	-0.431835		-0.665916	-0.405071	-0.535493
43_Uracil-Neopentane_1.05_dimer.out	-611.845	43_Uracil-Neopentane_1.05_cpA.out	-197.486	43_Uracil-Neopentane_1.05_cpB.out	-414.354	43_Uracil-Neopentane_1.00_monomerA.out	-414.354	43_Uracil-Neopentane_1.00_monomerB.out	-197.486		2.98201	3.20406	3.09303		3.415	3.478	3.56649		-0.432994	-0.210944	-0.321969		-0.495994	-0.273944	-0.384969		-0.584487	-0.362437	-0.473462
43_Uracil-Neopentane_1.10_dimer.out	-611.844	43_Uracil-Neopentane_1.10_cpA.out	-197.486	43_Uracil-Neopentane_1.10_cpB.out	-414.354	43_Uracil-Neopentane_1.00_monomerA.out	-414.354	43_Uracil-Neopentane_1.00_monomerB.out	-197.486		2.68832	2.87863	2.78347		3.083	3.142	3.21715		-0.394683	-0.20437	-0.299527		-0.453683	-0.26337	-0.358527		-0.528829	-0.338516	-0.433672
43_Uracil-Neopentane_1.25_dimer.out	-611.842	43_Uracil-Neopentane_1.25_cpA.out	-197.486	43_Uracil-Neopentane_1.25_cpB.out	-414.354	43_Uracil-Neopentane_1.00_monomerA.out	-414.354	43_Uracil-Neopentane_1.00_monomerB.out	-197.486		1.66675	1.78672	1.72674		2.013	2.055	2.10216		-0.346252	-0.226278	-0.286265		-0.388252	-0.268278	-0.328265		-0.435407	-0.315433	-0.37542
43_Uracil-Neopentane_1.50_dimer.out	-611.841	43_Uracil-Neopentane_1.50_cpA.out	-197.486	43_Uracil-Neopentane_1.50_cpB.out	-414.354	43_Uracil-Neopentane_1.00_monomerA.out	-414.354	43_Uracil-Neopentane_1.00_monomerB.out	-197.486		0.619204	0.676816	0.64801		0.912	0.932	0.955087		-0.292796	-0.235184	-0.26399		-0.312796	-0.255184	-0.28399		-0.335883	-0.278271	-0.307077
43_Uracil-Neopentane_2.00_dimer.out	-611.84	43_Uracil-Neopentane_2.00_cpA.out	-197.486	43_Uracil-Neopentane_2.00_cpB.out	-414.354	43_Uracil-Neopentane_1.00_monomerA.out	-414.354	43_Uracil-Neopentane_1.00_monomerB.out	-197.486		0.0477345	0.0645519	0.0561432		0.229	0.235	0.243577		-0.181265	-0.164448	-0.172857		-0.187265	-0.170448	-0.178857		-0.195843	-0.179026	-0.187434
44_Ethene-Pentane_0.90_dimer.out	-275.955	44_Ethene-Pentane_0.90_cpA.out	-197.48	44_Ethene-Pentane_0.90_cpB.out	-78.4723	44_Ethene-Pentane_1.00_monomerA.out	-78.4722	44_Ethene-Pentane_1.00_monomerB.out	-197.48		1.35405	1.50173	1.42789		1.597	1.589	1.64737		-0.242947	-0.0952706	-0.169109		-0.234947	-0.0872706	-0.161109		-0.293315	-0.145638	-0.219477
44_Ethene-Pentane_0.95_dimer.out	-275.955	44_Ethene-Pentane_0.95_cpA.out	-197.48	44_Ethene-Pentane_0.95_cpB.out	-78.4723	44_Ethene-Pentane_1.00_monomerA.out	-78.4722	44_Ethene-Pentane_1.00_monomerB.out	-197.48		1.74987	1.87389	1.81188		1.918	1.918	1.96622		-0.168135	-0.0441105	-0.106123		-0.168135	-0.0441105	-0.106123		-0.216355	-0.092331	-0.154343
44_Ethene-Pentane_1.00_dimer.out	-275.955	44_Ethene-Pentane_1.00_cpA.out	-197.48	44_Ethene-Pentane_1.00_cpB.out	-78.4722	44_Ethene-Pentane_1.00_monomerA.out	-78.4722	44_Ethene-Pentane_1.00_monomerB.out	-197.48		1.81887	1.92177	1.87032		1.943	1.948	1.98672		-0.124135	-0.0212297	-0.0726823		-0.129135	-0.0262297	-0.0776823		-0.167851	-0.0649458	-0.116398
44_Ethene-Pentane_1.05_dimer.out	-275.955	44_Ethene-Pentane_1.05_cpA.out	-197.48	44_Ethene-Pentane_1.05_cpB.out	-78.4722	44_Ethene-Pentane_1.00_monomerA.out	-78.4722	44_Ethene-Pentane_1.00_monomerB.out	-197.48		1.72242	1.80855	1.76549		1.822	1.83	1.86125		-0.0995808	-0.0134463	-0.0565136		-0.107581	-0.0214463	-0.0645136		-0.138828	-0.0526934	-0.0957606
44_Ethene-Pentane_1.10_dimer.out	-275.955	44_Ethene-Pentane_1.10_cpA.out	-197.48	44_Ethene-Pentane_1.10_cpB.out	-78.4722	44_Ethene-Pentane_1.00_monomerA.out	-78.4722	44_Ethene-Pentane_1.00_monomerB.out	-197.48		1.55131	1.62375	1.58753		1.639	1.648	1.67396		-0.0876944	-0.0152519	-0.0514732		-0.0966944	-0.0242519	-0.0604732		-0.122658	-0.0502151	-0.0864364
44_Ethene-Pentane_1.25_dimer.out	-275.954	44_Ethene-Pentane_1.25_cpA.out	-197.48	44_Ethene-Pentane_1.25_cpB.out	-78.4722	44_Ethene-Pentane_1.00_monomerA.out	-78.4722	44_Ethene-Pentane_1.00_monomerB.out	-197.48		0.985946	1.03072	1.00833		1.069	1.078	1.09294		-0.0830536	-0.0382786	-0.0606661		-0.0920536	-0.0472786	-0.0696661		-0.106992	-0.0622173	-0.0846048
44_Ethene-Pentane_1.50_dimer.out	-275.953	44_Ethene-Pentane_1.50_cpA.out	-197.48	44_Ethene-Pentane_1.50_cpB.out	-78.4722	44_Ethene-Pentane_1.00_monomerA.out	-78.4722	44_Ethene-Pentane_1.00_monomerB.out	-197.48		0.410685	0.433077	0.421881		0.481	0.49	0.49698		-0.0703147	-0.0479227	-0.0591187		-0.0793147	-0.0569227	-0.0681187		-0.0862942	-0.0639022	-0.0750982
44_Ethene-Pentane_2.00_dimer.out	-275.953	44_Ethene-Pentane_2.00_cpA.out	-197.48	44_Ethene-Pentane_2.00_cpB.out	-78.4722	44_Ethene-Pentane_1.00_monomerA.out	-78.4722	44_Ethene-Pentane_1.00_monomerB.out	-197.48		0.0909825	0.0972443	0.0941134		0.117	0.121	0.123279		-0.0260175	-0.0197557	-0.0228866		-0.0300175	-0.0237557	-0.0268866		-0.0322968	-0.026035	-0.0291659
45_Ethyne-Pentane_0.90_dimer.out	-274.703	45_Ethyne-Pentane_0.90_cpA.out	-197.48	45_Ethyne-Pentane_0.90_cpB.out	-77.221	45_Ethyne-Pentane_1.00_monomerA.out	-77.2209	45_Ethyne-Pentane_1.00_monomerB.out	-197.48		0.907719	1.05916	0.983441		0.992	0.997	1.04531		-0.0842814	0.0671631	-0.00855915		-0.0892814	0.0621631	-0.0135591		-0.137596	0.0138485	-0.0618737
45_Ethyne-Pentane_0.95_dimer.out	-274.704	45_Ethyne-Pentane_0.95_cpA.out	-197.48	45_Ethyne-Pentane_0.95_cpB.out	-77.221	45_Ethyne-Pentane_1.00_monomerA.out	-77.2209	45_Ethyne-Pentane_1.00_monomerB.out	-197.48		1.46395	1.58849	1.52622		1.51	1.526	1.56349		-0.0460531	0.0784865	0.0162167		-0.0620531	0.0624865	0.000216725		-0.0995393	0.0250003	-0.0372695
45_Ethyne-Pentane_1.00_dimer.out	-274.704	45_Ethyne-Pentane_1.00_cpA.out	-197.48	45_Ethyne-Pentane_1.00_cpB.out	-77.221	45_Ethyne-Pentane_1.00_monomerA.out	-77.2209	45_Ethyne-Pentane_1.00_monomerB.out	-197.48		1.61388	1.71621	1.66505		1.646	1.669	1.69762		-0.0321197	0.0702119	0.0190461		-0.0551197	0.0472119	-0.00395393		-0.0837434	0.0185883	-0.0325776
45_Ethyne-Pentane_1.05_dimer.out	-274.704	45_Ethyne-Pentane_1.05_cpA.out	-197.48	45_Ethyne-Pentane_1.05_cpB.out	-77.221	45_Ethyne-Pentane_1.00_monomerA.out	-77.2209	45_Ethyne-Pentane_1.00_monomerB.out	-197.48		1.5567	1.64121	1.59895		1.589	1.616	1.63779		-0.0322987	0.0522066	0.00995396		-0.0592987	0.0252066	-0.017046		-0.0810843	0.00342108	-0.0388316
45_Ethyne-Pentane_1.10_dimer.out	-274.703	45_Ethyne-Pentane_1.10_cpA.out	-197.48	45_Ethyne-Pentane_1.10_cpB.out	-77.221	45_Ethyne-Pentane_1.00_monomerA.out	-77.2209	45_Ethyne-Pentane_1.00_monomerB.out	-197.48		1.40308	1.47402	1.43855		1.444	1.473	1.48983		-0.040917	0.0300174	-0.00544981		-0.069917	0.00101738	-0.0344498		-0.0867443	-0.0158099	-0.0512771
45_Ethyne-Pentane_1.25_dimer.out	-274.702	45_Ethyne-Pentane_1.25_cpA.out	-197.48	45_Ethyne-Pentane_1.25_cpB.out	-77.2209	45_Ethyne-Pentane_1.00_monomerA.out	-77.2209	45_Ethyne-Pentane_1.00_monomerB.out	-197.48		0.85568	0.900065	0.877873		0.932	0.958	0.966266		-0.0763196	-0.0319347	-0.0541272		-0.10232	-0.0579347	-0.0801272		-0.110586	-0.0662007	-0.0883931
45_Ethyne-Pentane_1.50_dimer.out	-274.702	45_Ethyne-Pentane_1.50_cpA.out	-197.48	45_Ethyne-Pentane_1.50_cpB.out	-77.2209	45_Ethyne-Pentane_1.00_monomerA.out	-77.2209	45_Ethyne-Pentane_1.00_monomerB.out	-197.48		0.305461	0.326191	0.315826		0.4	0.418	0.420584		-0.0945387	-0.0738086	-0.0841736		-0.112539	-0.0918086	-0.102174		-0.115123	-0.0943924	-0.104757
45_Ethyne-Pentane_2.00_dimer.out	-274.701	45_Ethyne-Pentane_2.00_cpA.out	-197.48	45_Ethyne-Pentane_2.00_cpB.out	-77.2209	45_Ethyne-Pentane_1.00_monomerA.out	-77.2209	45_Ethyne-Pentane_1.00_monomerB.out	-197.48		0.0177142	0.0232872	0.0205007		0.092	0.097	0.0981162		-0.0742858	-0.0687128	-0.0714993		-0.0792858	-0.0737128	-0.0764993		-0.080402	-0.0748291	-0.0776155
46_Peptide-Pentane_0.90_dimer.out	-445.714	46_Peptide-Pentane_0.90_cpA.out	-197.48	46_Peptide-Pentane_0.90_cpB.out	-248.229	46_Peptide-Pentane_1.00_monomerA.out	-248.229	46_Peptide-Pentane_1.00_monomerB.out	-197.48		2.95241	3.2813	3.11686		3.655	3.673	3.81429		-0.702586	-0.373702	-0.538144		-0.720586	-0.391702	-0.556144		-0.86188	-0.532997	-0.697439
46_Peptide-Pentane_0.95_dimer.out	-445.715	46_Peptide-Pentane_0.95_cpA.out	-197.48	46_Peptide-Pentane_0.95_cpB.out	-248.229	46_Peptide-Pentane_1.00_monomerA.out	-248.229	46_Peptide-Pentane_1.00_monomerB.out	-197.48		3.56181	3.84514	3.70348		4.115	4.144	4.26368		-0.553191	-0.269858	-0.411525		-0.582191	-0.298858	-0.440525		-0.701867	-0.418534	-0.5602
46_Peptide-Pentane_1.00_dimer.out	-445.715	46_Peptide-Pentane_1.00_cpA.out	-197.48	46_Peptide-Pentane_1.00_cpB.out	-248.229	46_Peptide-Pentane_1.00_monomerA.out	-248.229	46_Peptide-Pentane_1.00_monomerB.out	-197.48		3.71479	3.9599	3.83735		4.162	4.195	4.29754		-0.447212	-0.202096	-0.324654		-0.480212	-0.235096	-0.357654		-0.582749	-0.337634	-0.460192
46_Peptide-Pentane_1.05_dimer.out	-445.715	46_Peptide-Pentane_1.05_cpA.out	-197.48	46_Peptide-Pentane_1.05_cpB.out	-248.229	46_Peptide-Pentane_1.00_monomerA.out	-248.229	46_Peptide-Pentane_1.00_monomerB.out	-197.48		3.60035	3.81469	3.70752		3.974	4.009	4.09624		-0.373646	-0.159306	-0.266476		-0.408646	-0.194306	-0.301476		-0.495886	-0.281546	-0.388716
46_Peptide-Pentane_1.10_dimer.out	-445.715	46_Peptide-Pentane_1.10_cpA.out	-197.48	46_Peptide-Pentane_1.10_cpB.out	-248.229	46_Peptide-Pentane_1.00_monomerA.out	-248.229	46_Peptide-Pentane_1.00_monomerB.out	-197.48		3.33994	3.52682	3.43338		3.665	3.7	3.77452		-0.325065	-0.138184	-0.231624		-0.360065	-0.173184	-0.266624		-0.434584	-0.247703	-0.341144
46_Peptide-Pentane_1.25_dimer.out	-445.713	46_Peptide-Pentane_1.25_cpA.out	-197.48	46_Peptide-Pentane_1.25_cpB.out	-248.229	46_Peptide-Pentane_1.00_monomerA.out	-248.229	46_Peptide-Pentane_1.00_monomerB.out	-197.48		2.32716	2.45081	2.38898		2.586	2.615	2.66244		-0.258842	-0.135191	-0.197016		-0.287842	-0.164191	-0.226016		-0.335286	-0.211634	-0.27346
46_Peptide-Pentane_1.50_dimer.out	-445.711	46_Peptide-Pentane_1.50_cpA.out	-197.48	46_Peptide-Pentane_1.50_cpB.out	-248.229	46_Peptide-Pentane_1.00_monomerA.out	-248.229	46_Peptide-Pentane_1.00_monomerB.out	-197.48		0.966693	1.02577	0.996233		1.172	1.19	1.21242		-0.205307	-0.146227	-0.175767		-0.223307	-0.164227	-0.193767		-0.245726	-0.186645	-0.216185
46_Peptide-Pentane_2.00_dimer.out	-445.71	46_Peptide-Pentane_2.00_cpA.out	-197.48	46_Peptide-Pentane_2.00_cpB.out	-248.229	46_Peptide-Pentane_1.00_monomerA.out	-248.229	46_Peptide-Pentane_1.00_monomerB.out	-197.48		0.194083	0.211491	0.202787		0.282	0.29	0.297776		-0.0879168	-0.0705089	-0.0792129		-0.0959168	-0.0785089	-0.0872129		-0.103693	-0.0862853	-0.0949893
47_Benzene-Benzene_TS_0.90_dimer.out	-463.828	47_Benzene-Benzene_TS_0.90_cpA.out	-231.913	47_Benzene-Benzene_TS_0.90_cpB.out	-231.913	47_Benzene-Benzene_TS_1.00_monomerA.out	-231.913	47_Benzene-Benzene_TS_1.00_monomerB.out	-231.913		1.42464	1.72614	1.57539		1.493	1.549	1.65707		-0.0683649	0.233145	0.08239		-0.124365	0.177145	0.02639		-0.232434	0.0690757	-0.0816793
47_Benzene-Benzene_TS_0.95_dimer.out	-463.829	47_Benzene-Benzene_TS_0.95_cpA.out	-231.913	47_Benzene-Benzene_TS_0.95_cpB.out	-231.913	47_Benzene-Benzene_TS_1.00_monomerA.out	-231.913	47_Benzene-Benzene_TS_1.00_monomerB.out	-231.913		2.44074	2.69557	2.56815		2.452	2.513	2.6025		-0.011259	0.243566	0.116154		-0.072259	0.182566	0.0551536		-0.161761	0.0930642	-0.0343484
47_Benzene-Benzene_TS_1.00_dimer.out	-463.83	47_Benzene-Benzene_TS_1.00_cpA.out	-231.913	47_Benzene-Benzene_TS_1.00_cpB.out	-231.913	47_Benzene-Benzene_TS_1.00_monomerA.out	-231.913	47_Benzene-Benzene_TS_1.00_monomerB.out	-231.913		2.77882	2.99452	2.88667		2.762	2.823	2.89781		0.0168169	0.232519	0.124668		-0.0441831	0.171519	0.0636679		-0.11899	0.0967116	-0.0111393
47_Benzene-Benzene_TS_1.05_dimer.out	-463.83	47_Benzene-Benzene_TS_1.05_cpA.out	-231.913	47_Benzene-Benzene_TS_1.05_cpB.out	-231.913	47_Benzene-Benzene_TS_1.00_monomerA.out	-231.913	47_Benzene-Benzene_TS_1.00_monomerB.out	-231.913		2.75733	2.93855	2.84794		2.731	2.79	2.8525		0.0263343	0.207546	0.11694		-0.0326657	0.148546	0.0579402		-0.0951668	0.0860449	-0.00456092
47_Benzene-Benzene_TS_1.10_dimer.out	-463.829	47_Benzene-Benzene_TS_1.10_cpA.out	-231.913	47_Benzene-Benzene_TS_1.10_cpB.out	-231.913	47_Benzene-Benzene_TS_1.00_monomerA.out	-231.913	47_Benzene-Benzene_TS_1.00_monomerB.out	-231.913		2.55788	2.71098	2.63443		2.536	2.59	2.64267		0.0218764	0.174977	0.0984267		-0.0321236	0.120977	0.0444267		-0.0847966	0.0683041	-0.00824626
47_Benzene-Benzene_TS_1.25_dimer.out	-463.828	47_Benzene-Benzene_TS_1.25_cpA.out	-231.913	47_Benzene-Benzene_TS_1.25_cpB.out	-231.913	47_Benzene-Benzene_TS_1.00_monomerA.out	-231.913	47_Benzene-Benzene_TS_1.00_monomerB.out	-231.913		1.71735	1.81319	1.76527		1.734	1.772	1.80356		-0.0166465	0.0791884	0.0312709		-0.0546465	0.0411884	-0.00672905		-0.0862097	0.00962512	-0.0382923
47_Benzene-Benzene_TS_1.50_dimer.out	-463.826	47_Benzene-Benzene_TS_1.50_cpA.out	-231.913	47_Benzene-Benzene_TS_1.50_cpB.out	-231.913	47_Benzene-Benzene_TS_1.00_monomerA.out	-231.913	47_Benzene-Benzene_TS_1.00_monomerB.out	-231.913		0.764202	0.811652	0.787927		0.818	0.839	0.855794		-0.0537981	-0.00634752	-0.0300728		-0.0747981	-0.0273475	-0.0510728		-0.0915917	-0.0441411	-0.0678664
47_Benzene-Benzene_TS_2.00_dimer.out	-463.825	47_Benzene-Benzene_TS_2.00_cpA.out	-231.913	47_Benzene-Benzene_TS_2.00_cpB.out	-231.913	47_Benzene-Benzene_TS_1.00_monomerA.out	-231.913	47_Benzene-Benzene_TS_1.00_monomerB.out	-231.913		0.193753	0.207876	0.200814		0.222	0.23	0.237012		-0.0282475	-0.0141244	-0.0211859		-0.0362475	-0.0221244	-0.0291859		-0.0432591	-0.029136	-0.0361975
48_Pyridine-Pyridine_TS_0.90_dimer.out	-495.89	48_Pyridine-Pyridine_TS_0.90_cpA.out	-247.943	48_Pyridine-Pyridine_TS_0.90_cpB.out	-247.943	48_Pyridine-Pyridine_TS_1.00_monomerA.out	-247.943	48_Pyridine-Pyridine_TS_1.00_monomerB.out	-247.943		2.31666	2.60211	2.45938		2.402	2.444	2.54666		-0.0853447	0.200107	0.0573811		-0.127345	0.158107	0.0153811		-0.230007	0.0554446	-0.0872812
48_Pyridine-Pyridine_TS_0.95_dimer.out	-495.891	48_Pyridine-Pyridine_TS_0.95_cpA.out	-247.943	48_Pyridine-Pyridine_TS_0.95_cpB.out	-247.943	48_Pyridine-Pyridine_TS_1.00_monomerA.out	-247.943	48_Pyridine-Pyridine_TS_1.00_monomerB.out	-247.943		3.17866	3.42094	3.2998		3.199	3.248	3.33554		-0.0203434	0.221941	0.100799		-0.0693434	0.172941	0.0517986		-0.156879	0.0854047	-0.0357373
48_Pyridine-Pyridine_TS_1.00_dimer.out	-495.892	48_Pyridine-Pyridine_TS_1.00_cpA.out	-247.943	48_Pyridine-Pyridine_TS_1.00_cpB.out	-247.943	48_Pyridine-Pyridine_TS_1.00_monomerA.out	-247.943	48_Pyridine-Pyridine_TS_1.00_monomerB.out	-247.943		3.4585	3.66513	3.56181		3.44	3.492	3.56603		0.0185013	0.225127	0.121814		-0.0334987	0.173127	0.0698142		-0.107527	0.0990989	-0.00421395
48_Pyridine-Pyridine_TS_1.05_dimer.out	-495.891	48_Pyridine-Pyridine_TS_1.05_cpA.out	-247.943	48_Pyridine-Pyridine_TS_1.05_cpB.out	-247.943	48_Pyridine-Pyridine_TS_1.00_monomerA.out	-247.943	48_Pyridine-Pyridine_TS_1.00_monomerB.out	-247.943		3.41122	3.58763	3.49942		3.375	3.426	3.48901		0.0362158	0.212626	0.124421		-0.0147842	0.161626	0.0734208		-0.0777893	0.0986208	0.0104157
48_Pyridine-Pyridine_TS_1.10_dimer.out	-495.891	48_Pyridine-Pyridine_TS_1.10_cpA.out	-247.943	48_Pyridine-Pyridine_TS_1.10_cpB.out	-247.943	48_Pyridine-Pyridine_TS_1.00_monomerA.out	-247.943	48_Pyridine-Pyridine_TS_1.00_monomerB.out	-247.943		3.19244	3.34511	3.26878		3.154	3.202	3.25501		0.0384389	0.191114	0.114777		-0.00956108	0.143114	0.0667766		-0.0625717	0.0901037	0.013766
48_Pyridine-Pyridine_TS_1.25_dimer.out	-495.89	48_Pyridine-Pyridine_TS_1.25_cpA.out	-247.943	48_Pyridine-Pyridine_TS_1.25_cpB.out	-247.943	48_Pyridine-Pyridine_TS_1.00_monomerA.out	-247.943	48_Pyridine-Pyridine_TS_1.00_monomerB.out	-247.943		2.26705	2.36725	2.31715		2.259	2.294	2.32764		0.00804605	0.10825	0.0581481		-0.026954	0.0732501	0.0231481		-0.0605913	0.0396128	-0.0104892
48_Pyridine-Pyridine_TS_1.50_dimer.out	-495.888	48_Pyridine-Pyridine_TS_1.50_cpA.out	-247.943	48_Pyridine-Pyridine_TS_1.50_cpB.out	-247.943	48_Pyridine-Pyridine_TS_1.00_monomerA.out	-247.943	48_Pyridine-Pyridine_TS_1.00_monomerB.out	-247.943		1.13033	1.18275	1.15654		1.168	1.188	1.20594		-0.0376745	0.0147536	-0.0114605		-0.0576745	-0.00524639	-0.0314605		-0.0756117	-0.0231836	-0.0493977
48_Pyridine-Pyridine_TS_2.00_dimer.out	-495.886	48_Pyridine-Pyridine_TS_2.00_cpA.out	-247.943	48_Pyridine-Pyridine_TS_2.00_cpB.out	-247.943	48_Pyridine-Pyridine_TS_1.00_monomerA.out	-247.943	48_Pyridine-Pyridine_TS_1.00_monomerB.out	-247.943		0.344633	0.363669	0.354151		0.37	0.378	0.384102		-0.0253668	-0.00633092	-0.0158489		-0.0333668	-0.0143309	-0.0238489		-0.0394689	-0.0204331	-0.029951
49_Benzene-Pyridine_TS_0.90_dimer.out	-479.859	49_Benzene-Pyridine_TS_0.90_cpA.out	-247.943	49_Benzene-Pyridine_TS_0.90_cpB.out	-231.913	49_Benzene-Pyridine_TS_1.00_monomerA.out	-231.913	49_Benzene-Pyridine_TS_1.00_monomerB.out	-247.943		1.86674	2.17031	2.01852		1.945	1.992	2.09912		-0.0782646	0.225311	0.073523		-0.125265	0.178311	0.026523		-0.232383	0.0711925	-0.0805951
49_Benzene-Pyridine_TS_0.95_dimer.out	-479.86	49_Benzene-Pyridine_TS_0.95_cpA.out	-247.943	49_Benzene-Pyridine_TS_0.95_cpB.out	-231.913	49_Benzene-Pyridine_TS_1.00_monomerA.out	-231.913	49_Benzene-Pyridine_TS_1.00_monomerB.out	-247.943		2.90534	3.16213	3.03373		2.922	2.975	3.0636		-0.0166637	0.240126	0.111731		-0.0696637	0.187126	0.0587314		-0.158261	0.0985293	-0.0298658
49_Benzene-Pyridine_TS_1.00_dimer.out	-479.861	49_Benzene-Pyridine_TS_1.00_cpA.out	-247.943	49_Benzene-Pyridine_TS_1.00_cpB.out	-231.913	49_Benzene-Pyridine_TS_1.00_monomerA.out	-231.913	49_Benzene-Pyridine_TS_1.00_monomerB.out	-247.943		3.24189	3.45909	3.35049		3.226	3.28	3.35433		0.0158854	0.233095	0.12449		-0.0381146	0.179095	0.0704901		-0.11244	0.104769	-0.00383576
49_Benzene-Pyridine_TS_1.05_dimer.out	-479.861	49_Benzene-Pyridine_TS_1.05_cpA.out	-247.943	49_Benzene-Pyridine_TS_1.05_cpB.out	-231.913	49_Benzene-Pyridine_TS_1.00_monomerA.out	-231.913	49_Benzene-Pyridine_TS_1.00_monomerB.out	-247.943		3.20379	3.38738	3.29559		3.176	3.229	3.29112		0.0277945	0.211381	0.119588		-0.0252055	0.158381	0.0665876		-0.0873289	0.0962574	0.00446426
49_Benzene-Pyridine_TS_1.10_dimer.out	-479.86	49_Benzene-Pyridine_TS_1.10_cpA.out	-247.943	49_Benzene-Pyridine_TS_1.10_cpB.out	-231.913	49_Benzene-Pyridine_TS_1.00_monomerA.out	-231.913	49_Benzene-Pyridine_TS_1.00_monomerB.out	-247.943		2.98071	3.1354	3.05805		2.955	3.004	3.05632		0.0257076	0.180396	0.103052		-0.0232924	0.131396	0.0540516		-0.0756129	0.0790751	0.0017311
49_Benzene-Pyridine_TS_1.25_dimer.out	-479.859	49_Benzene-Pyridine_TS_1.25_cpA.out	-247.943	49_Benzene-Pyridine_TS_1.25_cpB.out	-231.913	49_Benzene-Pyridine_TS_1.00_monomerA.out	-231.913	49_Benzene-Pyridine_TS_1.00_monomerB.out	-247.943		2.05667	2.15385	2.10526		2.068	2.103	2.13397		-0.0113282	0.0858549	0.0372633		-0.0463282	0.0508549	0.00226335		-0.0773019	0.0198813	-0.0287103
49_Benzene-Pyridine_TS_1.50_dimer.out	-479.857	49_Benzene-Pyridine_TS_1.50_cpA.out	-247.943	49_Benzene-Pyridine_TS_1.50_cpB.out	-231.913	49_Benzene-Pyridine_TS_1.00_monomerA.out	-231.913	49_Benzene-Pyridine_TS_1.00_monomerB.out	-247.943		0.991488	1.04092	1.01621		1.042	1.06	1.07499		-0.0505119	-0.0010775	-0.0257947		-0.0685119	-0.0190775	-0.0437947		-0.0835009	-0.0340665	-0.0587837
49_Benzene-Pyridine_TS_2.00_dimer.out	-479.856	49_Benzene-Pyridine_TS_2.00_cpA.out	-247.943	49_Benzene-Pyridine_TS_2.00_cpB.out	-231.913	49_Benzene-Pyridine_TS_1.00_monomerA.out	-231.913	49_Benzene-Pyridine_TS_1.00_monomerB.out	-247.943		0.305323	0.320345	0.312834		0.332	0.339	0.344899		-0.0266774	-0.0116547	-0.019166		-0.0336774	-0.0186547	-0.026166		-0.0395763	-0.0245536	-0.032065
50_Benzene-Ethyne_CH-pi_0.90_dimer.out	-309.137	50_Benzene-Ethyne_CH-pi_0.90_cpA.out	-77.221	50_Benzene-Ethyne_CH-pi_0.90_cpB.out	-231.913	50_Benzene-Ethyne_CH-pi_1.00_monomerA.out	-231.913	50_Benzene-Ethyne_CH-pi_1.00_monomerB.out	-77.2209		1.79932	2.00259	1.90095		1.791	1.784	1.84672		0.00831635	0.211586	0.109951		0.0153163	0.218586	0.116951		-0.0474045	0.155866	0.0542306
50_Benzene-Ethyne_CH-pi_0.95_dimer.out	-309.138	50_Benzene-Ethyne_CH-pi_0.95_cpA.out	-77.221	50_Benzene-Ethyne_CH-pi_0.95_cpB.out	-231.913	50_Benzene-Ethyne_CH-pi_1.00_monomerA.out	-231.913	50_Benzene-Ethyne_CH-pi_1.00_monomerB.out	-77.2209		2.62317	2.7922	2.70769		2.58	2.585	2.63638		0.0431735	0.212199	0.127686		0.0381735	0.207199	0.122686		-0.0132048	0.15582	0.0713078
50_Benzene-Ethyne_CH-pi_1.00_dimer.out	-309.138	50_Benzene-Ethyne_CH-pi_1.00_cpA.out	-77.221	50_Benzene-Ethyne_CH-pi_1.00_cpB.out	-231.913	50_Benzene-Ethyne_CH-pi_1.00_monomerA.out	-231.913	50_Benzene-Ethyne_CH-pi_1.00_monomerB.out	-77.2209		2.86772	3.00941	2.93856		2.81	2.822	2.86486		0.0577168	0.199411	0.128564		0.0457168	0.187411	0.116564		0.00285343	0.144548	0.0737005
50_Benzene-Ethyne_CH-pi_1.05_dimer.out	-309.138	50_Benzene-Ethyne_CH-pi_1.05_cpA.out	-77.2209	50_Benzene-Ethyne_CH-pi_1.05_cpB.out	-231.913	50_Benzene-Ethyne_CH-pi_1.00_monomerA.out	-231.913	50_Benzene-Ethyne_CH-pi_1.00_monomerB.out	-77.2209		2.80487	2.9245	2.86469		2.747	2.764	2.79952		0.0578741	0.177503	0.117688		0.0408741	0.160503	0.100688		0.00535216	0.124981	0.0651665
50_Benzene-Ethyne_CH-pi_1.10_dimer.out	-309.138	50_Benzene-Ethyne_CH-pi_1.10_cpA.out	-77.2209	50_Benzene-Ethyne_CH-pi_1.10_cpB.out	-231.913	50_Benzene-Ethyne_CH-pi_1.00_monomerA.out	-231.913	50_Benzene-Ethyne_CH-pi_1.00_monomerB.out	-77.2209		2.59473	2.69487	2.6448		2.545	2.563	2.59289		0.0497322	0.149874	0.0998031		0.0317322	0.131874	0.0818031		0.00184211	0.101984	0.051913
50_Benzene-Ethyne_CH-pi_1.25_dimer.out	-309.136	50_Benzene-Ethyne_CH-pi_1.25_cpA.out	-77.2209	50_Benzene-Ethyne_CH-pi_1.25_cpB.out	-231.913	50_Benzene-Ethyne_CH-pi_1.00_monomerA.out	-231.913	50_Benzene-Ethyne_CH-pi_1.00_monomerB.out	-77.2209		1.77923	1.84303	1.81113		1.772	1.785	1.80226		0.00722789	0.0710302	0.039129		-0.00577211	0.0580302	0.026129		-0.0230295	0.0407728	0.00887167
50_Benzene-Ethyne_CH-pi_1.50_dimer.out	-309.135	50_Benzene-Ethyne_CH-pi_1.50_cpA.out	-77.2209	50_Benzene-Ethyne_CH-pi_1.50_cpB.out	-231.913	50_Benzene-Ethyne_CH-pi_1.00_monomerA.out	-231.913	50_Benzene-Ethyne_CH-pi_1.00_monomerB.out	-77.2209		0.864567	0.897454	0.88101		0.89	0.895	0.902823		-0.0254334	0.00745386	-0.00898977		-0.0304334	0.00245386	-0.0139898		-0.0382568	-0.00536955	-0.0218132
50_Benzene-Ethyne_CH-pi_2.00_dimer.out	-309.134	50_Benzene-Ethyne_CH-pi_2.00_cpA.out	-77.2209	50_Benzene-Ethyne_CH-pi_2.00_cpB.out	-231.913	50_Benzene-Ethyne_CH-pi_1.00_monomerA.out	-231.913	50_Benzene-Ethyne_CH-pi_1.00_monomerB.out	-77.2209		0.25717	0.266647	0.261908		0.272	0.274	0.277246		-0.0148305	-0.00535258	-0.0100915		-0.0168305	-0.00735258	-0.0120915		-0.0200767	-0.0105988	-0.0153377
51_Ethyne-Ethyne_TS_0.90_dimer.out	-154.444	51_Ethyne-Ethyne_TS_0.90_cpA.out	-77.2209	51_Ethyne-Ethyne_TS_0.90_cpB.out	-77.221	51_Ethyne-Ethyne_TS_1.00_monomerA.out	-77.2209	51_Ethyne-Ethyne_TS_1.00_monomerB.out	-77.2209		1.26804	1.34098	1.30451		1.17	1.183	1.20308		0.0980432	0.17098	0.134512		0.0850432	0.15798	0.121512		0.0649626	0.1379	0.101431
51_Ethyne-Ethyne_TS_0.95_dimer.out	-154.444	51_Ethyne-Ethyne_TS_0.95_cpA.out	-77.2209	51_Ethyne-Ethyne_TS_0.95_cpB.out	-77.221	51_Ethyne-Ethyne_TS_1.00_monomerA.out	-77.2209	51_Ethyne-Ethyne_TS_1.00_monomerB.out	-77.2209		1.53144	1.59282	1.56213		1.434	1.449	1.46352		0.0974435	0.158824	0.128134		0.0824435	0.143824	0.113134		0.0679257	0.129307	0.0986162
51_Ethyne-Ethyne_TS_1.00_dimer.out	-154.444	51_Ethyne-Ethyne_TS_1.00_cpA.out	-77.2209	51_Ethyne-Ethyne_TS_1.00_cpB.out	-77.221	51_Ethyne-Ethyne_TS_1.00_monomerA.out	-77.2209	51_Ethyne-Ethyne_TS_1.00_monomerB.out	-77.2209		1.58084	1.63338	1.60711		1.489	1.506	1.51585		0.0918384	0.144384	0.118111		0.0748384	0.127384	0.101111		0.0649913	0.117537	0.091264
51_Ethyne-Ethyne_TS_1.05_dimer.out	-154.444	51_Ethyne-Ethyne_TS_1.05_cpA.out	-77.2209	51_Ethyne-Ethyne_TS_1.05_cpB.out	-77.2209	51_Ethyne-Ethyne_TS_1.00_monomerA.out	-77.2209	51_Ethyne-Ethyne_TS_1.00_monomerB.out	-77.2209		1.51347	1.55881	1.53614		1.431	1.449	1.4559		0.0824656	0.127811	0.105138		0.0644656	0.109811	0.0871383		0.057562	0.102908	0.0802348
51_Ethyne-Ethyne_TS_1.10_dimer.out	-154.444	51_Ethyne-Ethyne_TS_1.10_cpA.out	-77.2209	51_Ethyne-Ethyne_TS_1.10_cpB.out	-77.2209	51_Ethyne-Ethyne_TS_1.00_monomerA.out	-77.2209	51_Ethyne-Ethyne_TS_1.00_monomerB.out	-77.2209		1.3887	1.42783	1.40826		1.318	1.335	1.34111		0.0707005	0.109829	0.0902649		0.0537005	0.0928292	0.0732649		0.0475858	0.0867146	0.0671502
51_Ethyne-Ethyne_TS_1.25_dimer.out	-154.443	51_Ethyne-Ethyne_TS_1.25_cpA.out	-77.2209	51_Ethyne-Ethyne_TS_1.25_cpB.out	-77.2209	51_Ethyne-Ethyne_TS_1.00_monomerA.out	-77.2209	51_Ethyne-Ethyne_TS_1.00_monomerB.out	-77.2209		0.952839	0.978159	0.965499		0.913	0.93	0.933765		0.0398388	0.0651591	0.0524989		0.0228388	0.0481591	0.0354989		0.0190736	0.0443939	0.0317337
51_Ethyne-Ethyne_TS_1.50_dimer.out	-154.443	51_Ethyne-Ethyne_TS_1.50_cpA.out	-77.2209	51_Ethyne-Ethyne_TS_1.50_cpB.out	-77.2209	51_Ethyne-Ethyne_TS_1.00_monomerA.out	-77.2209	51_Ethyne-Ethyne_TS_1.00_monomerB.out	-77.2209		0.467439	0.481213	0.474326		0.452	0.462	0.46263		0.0154395	0.0292129	0.0223262		0.00543946	0.0192129	0.0123262		0.00480931	0.0185827	0.011696
51_Ethyne-Ethyne_TS_2.00_dimer.out	-154.442	51_Ethyne-Ethyne_TS_2.00_cpA.out	-77.2209	51_Ethyne-Ethyne_TS_2.00_cpB.out	-77.2209	51_Ethyne-Ethyne_TS_1.00_monomerA.out	-77.2209	51_Ethyne-Ethyne_TS_1.00_monomerB.out	-77.2209		0.140845	0.144473	0.142659		0.134	0.135	0.135484		0.0068448	0.0104735	0.00865912		0.0058448	0.00947345	0.00765912		0.00536103	0.00898969	0.00717536
52_Benzene-AcOH_OH-pi_0.90_dimer.out	-460.766	52_Benzene-AcOH_OH-pi_0.90_cpA.out	-228.847	52_Benzene-AcOH_OH-pi_0.90_cpB.out	-231.913	52_Benzene-AcOH_OH-pi_1.00_monomerA.out	-231.912	52_Benzene-AcOH_OH-pi_1.00_monomerB.out	-228.847		3.71552	4.00446	3.85999		3.908	3.895	4.00161		-0.19248	0.0964625	-0.0480089		-0.17948	0.109463	-0.0350089		-0.286091	0.00285183	-0.14162
52_Benzene-AcOH_OH-pi_0.95_dimer.out	-460.767	52_Benzene-AcOH_OH-pi_0.95_cpA.out	-228.847	52_Benzene-AcOH_OH-pi_0.95_cpB.out	-231.913	52_Benzene-AcOH_OH-pi_1.00_monomerA.out	-231.912	52_Benzene-AcOH_OH-pi_1.00_monomerB.out	-228.847		4.39074	4.63627	4.5135		4.525	4.523	4.6131		-0.134264	0.111266	-0.0114988		-0.132264	0.113266	-0.00949882		-0.222366	0.0231648	-0.0996003
52_Benzene-AcOH_OH-pi_1.00_dimer.out	-460.767	52_Benzene-AcOH_OH-pi_1.00_cpA.out	-228.847	52_Benzene-AcOH_OH-pi_1.00_cpB.out	-231.913	52_Benzene-AcOH_OH-pi_1.00_monomerA.out	-231.912	52_Benzene-AcOH_OH-pi_1.00_monomerB.out	-228.847		4.55764	4.7669	4.66227		4.655	4.661	4.73718		-0.0973611	0.111901	0.00726971		-0.103361	0.105901	0.00126971		-0.179543	0.0297187	-0.0749121
52_Benzene-AcOH_OH-pi_1.05_dimer.out	-460.767	52_Benzene-AcOH_OH-pi_1.05_cpA.out	-228.847	52_Benzene-AcOH_OH-pi_1.05_cpB.out	-231.913	52_Benzene-AcOH_OH-pi_1.00_monomerA.out	-231.912	52_Benzene-AcOH_OH-pi_1.00_monomerB.out	-228.847		4.43096	4.60971	4.52034		4.508	4.519	4.58343		-0.0770355	0.101713	0.0123385		-0.0880355	0.0907125	0.0013385		-0.152465	0.0262826	-0.0630914
52_Benzene-AcOH_OH-pi_1.10_dimer.out	-460.766	52_Benzene-AcOH_OH-pi_1.10_cpA.out	-228.847	52_Benzene-AcOH_OH-pi_1.10_cpB.out	-231.913	52_Benzene-AcOH_OH-pi_1.00_monomerA.out	-231.912	52_Benzene-AcOH_OH-pi_1.00_monomerB.out	-228.847		4.14612	4.29921	4.22266		4.213	4.228	4.28292		-0.0668808	0.0862091	0.00966416		-0.0818808	0.0712091	-0.00533584		-0.136803	0.0162872	-0.0602578
52_Benzene-AcOH_OH-pi_1.25_dimer.out	-460.764	52_Benzene-AcOH_OH-pi_1.25_cpA.out	-228.847	52_Benzene-AcOH_OH-pi_1.25_cpB.out	-231.913	52_Benzene-AcOH_OH-pi_1.00_monomerA.out	-231.912	52_Benzene-AcOH_OH-pi_1.00_monomerB.out	-228.847		3.03131	3.13001	3.08066		3.107	3.121	3.15593		-0.0756896	0.0230092	-0.0263402		-0.0896896	0.00900923	-0.0403402		-0.124619	-0.0259203	-0.0752697
52_Benzene-AcOH_OH-pi_1.50_dimer.out	-460.762	52_Benzene-AcOH_OH-pi_1.50_cpA.out	-228.847	52_Benzene-AcOH_OH-pi_1.50_cpB.out	-231.913	52_Benzene-AcOH_OH-pi_1.00_monomerA.out	-231.912	52_Benzene-AcOH_OH-pi_1.00_monomerB.out	-228.847		1.59673	1.64764	1.62219		1.697	1.705	1.72199		-0.100265	-0.0493595	-0.0748124		-0.108265	-0.0573595	-0.0828124		-0.125252	-0.0743459	-0.0997987
52_Benzene-AcOH_OH-pi_2.00_dimer.out	-460.76	52_Benzene-AcOH_OH-pi_2.00_cpA.out	-228.847	52_Benzene-AcOH_OH-pi_2.00_cpB.out	-231.912	52_Benzene-AcOH_OH-pi_1.00_monomerA.out	-231.912	52_Benzene-AcOH_OH-pi_1.00_monomerB.out	-228.847		0.476691	0.492314	0.484503		0.554	0.558	0.564062		-0.0773087	-0.061686	-0.0694974		-0.0813087	-0.065686	-0.0734974		-0.0873704	-0.0717477	-0.079559
53_Benzene-AcNH2_NH-pi_0.90_dimer.out	-440.898	53_Benzene-AcNH2_NH-pi_0.90_cpA.out	-208.98	53_Benzene-AcNH2_NH-pi_0.90_cpB.out	-231.913	53_Benzene-AcNH2_NH-pi_1.00_monomerA.out	-231.912	53_Benzene-AcNH2_NH-pi_1.00_monomerB.out	-208.98		3.61265	3.84322	3.72793		3.768	3.763	3.84881		-0.155347	0.0752152	-0.0400658		-0.150347	0.0802152	-0.0350658		-0.23616	-0.00559775	-0.120879
53_Benzene-AcNH2_NH-pi_0.95_dimer.out	-440.899	53_Benzene-AcNH2_NH-pi_0.95_cpA.out	-208.98	53_Benzene-AcNH2_NH-pi_0.95_cpB.out	-231.913	53_Benzene-AcNH2_NH-pi_1.00_monomerA.out	-231.912	53_Benzene-AcNH2_NH-pi_1.00_monomerB.out	-208.98		4.14048	4.34141	4.24095		4.242	4.247	4.32013		-0.101517	0.0994108	-0.00105301		-0.106517	0.0944108	-0.00605301		-0.179652	0.0212759	-0.0791879
53_Benzene-AcNH2_NH-pi_1.00_dimer.out	-440.899	53_Benzene-AcNH2_NH-pi_1.00_cpA.out	-208.98	53_Benzene-AcNH2_NH-pi_1.00_cpB.out	-231.913	53_Benzene-AcNH2_NH-pi_1.00_monomerA.out	-231.912	53_Benzene-AcNH2_NH-pi_1.00_monomerB.out	-208.98		4.26863	4.44394	4.35629		4.334	4.346	4.40828		-0.0653654	0.109938	0.0222864		-0.0773654	0.0979382	0.0102864		-0.139643	0.0356604	-0.0519914
53_Benzene-AcNH2_NH-pi_1.05_dimer.out	-440.899	53_Benzene-AcNH2_NH-pi_1.05_cpA.out	-208.98	53_Benzene-AcNH2_NH-pi_1.05_cpB.out	-231.913	53_Benzene-AcNH2_NH-pi_1.00_monomerA.out	-231.912	53_Benzene-AcNH2_NH-pi_1.00_monomerB.out	-208.98		4.15755	4.31059	4.23407		4.201	4.216	4.27029		-0.0434535	0.109592	0.033069		-0.0584535	0.0945915	0.018069		-0.112741	0.0403037	-0.0362188
53_Benzene-AcNH2_NH-pi_1.10_dimer.out	-440.899	53_Benzene-AcNH2_NH-pi_1.10_cpA.out	-208.98	53_Benzene-AcNH2_NH-pi_1.10_cpB.out	-231.913	53_Benzene-AcNH2_NH-pi_1.00_monomerA.out	-231.912	53_Benzene-AcNH2_NH-pi_1.00_monomerB.out	-208.98		3.91163	4.04504	3.97834		3.945	3.961	4.0079		-0.0333663	0.100041	0.0333376		-0.0493663	0.0840415	0.0173376		-0.0962699	0.0371379	-0.029566
53_Benzene-AcNH2_NH-pi_1.25_dimer.out	-440.897	53_Benzene-AcNH2_NH-pi_1.25_cpA.out	-208.98	53_Benzene-AcNH2_NH-pi_1.25_cpB.out	-231.913	53_Benzene-AcNH2_NH-pi_1.00_monomerA.out	-231.912	53_Benzene-AcNH2_NH-pi_1.00_monomerB.out	-208.98		2.92255	3.01124	2.96689		2.96	2.974	3.00521		-0.0374528	0.0512402	0.00689366		-0.0514528	0.0372402	-0.00710634		-0.0826673	0.00602569	-0.0383208
53_Benzene-AcNH2_NH-pi_1.50_dimer.out	-440.895	53_Benzene-AcNH2_NH-pi_1.50_cpA.out	-208.98	53_Benzene-AcNH2_NH-pi_1.50_cpB.out	-231.913	53_Benzene-AcNH2_NH-pi_1.00_monomerA.out	-231.912	53_Benzene-AcNH2_NH-pi_1.00_monomerB.out	-208.98		1.58011	1.62549	1.6028		1.641	1.651	1.6679		-0.0608897	-0.0155075	-0.0381986		-0.0708897	-0.0255075	-0.0481986		-0.087791	-0.0424088	-0.0650999
53_Benzene-AcNH2_NH-pi_2.00_dimer.out	-440.893	53_Benzene-AcNH2_NH-pi_2.00_cpA.out	-208.98	53_Benzene-AcNH2_NH-pi_2.00_cpB.out	-231.912	53_Benzene-AcNH2_NH-pi_1.00_monomerA.out	-231.912	53_Benzene-AcNH2_NH-pi_1.00_monomerB.out	-208.98		0.435349	0.450262	0.442805		0.481	0.486	0.491778		-0.045651	-0.0307384	-0.0381947		-0.050651	-0.0357384	-0.0431947		-0.0564293	-0.0415166	-0.0489729
54_Benzene-Water_OH-pi_0.90_dimer.out	-308.28	54_Benzene-Water_OH-pi_0.90_cpA.out	-76.3632	54_Benzene-Water_OH-pi_0.90_cpB.out	-231.913	54_Benzene-Water_OH-pi_1.00_monomerA.out	-231.913	54_Benzene-Water_OH-pi_1.00_monomerB.out	-76.363		2.62837	2.81457	2.72147		2.745	2.71	2.76563		-0.116627	0.0695655	-0.0235307		-0.0816268	0.104565	0.0114693		-0.137259	0.0489338	-0.0441624
54_Benzene-Water_OH-pi_0.95_dimer.out	-308.281	54_Benzene-Water_OH-pi_0.95_cpA.out	-76.3632	54_Benzene-Water_OH-pi_0.95_cpB.out	-231.913	54_Benzene-Water_OH-pi_1.00_monomerA.out	-231.913	54_Benzene-Water_OH-pi_1.00_monomerB.out	-76.363		3.08346	3.24118	3.16232		3.161	3.139	3.18554		-0.0775439	0.0801833	0.00131971		-0.0555439	0.102183	0.0233197		-0.102082	0.0556448	-0.0232188
54_Benzene-Water_OH-pi_1.00_dimer.out	-308.281	54_Benzene-Water_OH-pi_1.00_cpA.out	-76.3632	54_Benzene-Water_OH-pi_1.00_cpB.out	-231.913	54_Benzene-Water_OH-pi_1.00_monomerA.out	-231.913	54_Benzene-Water_OH-pi_1.00_monomerB.out	-76.363		3.16688	3.30055	3.23371		3.224	3.212	3.25011		-0.0571219	0.0765489	0.00971346		-0.0451219	0.0885489	0.0217135		-0.0832336	0.0504372	-0.0163982
54_Benzene-Water_OH-pi_1.05_dimer.out	-308.281	54_Benzene-Water_OH-pi_1.05_cpA.out	-76.3631	54_Benzene-Water_OH-pi_1.05_cpB.out	-231.913	54_Benzene-Water_OH-pi_1.00_monomerA.out	-231.913	54_Benzene-Water_OH-pi_1.00_monomerB.out	-76.363		3.04561	3.15994	3.10277		3.094	3.089	3.12098		-0.0483941	0.0659366	0.00877124		-0.0433941	0.0709366	0.0137712		-0.0753728	0.0389579	-0.0182074
54_Benzene-Water_OH-pi_1.10_dimer.out	-308.28	54_Benzene-Water_OH-pi_1.10_cpA.out	-76.3631	54_Benzene-Water_OH-pi_1.10_cpB.out	-231.913	54_Benzene-Water_OH-pi_1.00_monomerA.out	-231.913	54_Benzene-Water_OH-pi_1.00_monomerB.out	-76.363		2.82136	2.91988	2.87062		2.87	2.869	2.89572		-0.0486404	0.0498757	0.000617674		-0.0476404	0.0508757	0.00161767		-0.074362	0.0241541	-0.0251039
54_Benzene-Water_OH-pi_1.25_dimer.out	-308.279	54_Benzene-Water_OH-pi_1.25_cpA.out	-76.3631	54_Benzene-Water_OH-pi_1.25_cpB.out	-231.913	54_Benzene-Water_OH-pi_1.00_monomerA.out	-231.913	54_Benzene-Water_OH-pi_1.00_monomerB.out	-76.363		2.01889	2.08454	2.05171		2.089	2.09	2.10498		-0.0701133	-0.00446251	-0.0372879		-0.0711133	-0.00546251	-0.0382879		-0.0860912	-0.0204404	-0.0532658
54_Benzene-Water_OH-pi_1.50_dimer.out	-308.277	54_Benzene-Water_OH-pi_1.50_cpA.out	-76.3631	54_Benzene-Water_OH-pi_1.50_cpB.out	-231.913	54_Benzene-Water_OH-pi_1.00_monomerA.out	-231.913	54_Benzene-Water_OH-pi_1.00_monomerB.out	-76.363		1.06179	1.09613	1.07896		1.154	1.153	1.16029		-0.0922086	-0.0578689	-0.0750388		-0.0912086	-0.0568689	-0.0740388		-0.0985002	-0.0641606	-0.0813304
54_Benzene-Water_OH-pi_2.00_dimer.out	-308.276	54_Benzene-Water_OH-pi_2.00_cpA.out	-76.363	54_Benzene-Water_OH-pi_2.00_cpB.out	-231.913	54_Benzene-Water_OH-pi_1.00_monomerA.out	-231.913	54_Benzene-Water_OH-pi_1.00_monomerB.out	-76.363		0.34518	0.353466	0.349323		0.417	0.417	0.419038		-0.0718198	-0.0635339	-0.0676768		-0.0718198	-0.0635339	-0.0676768		-0.0738581	-0.0655722	-0.0697151
55_Benzene-MeOH_OH-pi_0.90_dimer.out	-347.517	55_Benzene-MeOH_OH-pi_0.90_cpA.out	-115.599	55_Benzene-MeOH_OH-pi_0.90_cpB.out	-231.913	55_Benzene-MeOH_OH-pi_1.00_monomerA.out	-231.913	55_Benzene-MeOH_OH-pi_1.00_monomerB.out	-115.599		3.15801	3.40478	3.28139		3.338	3.316	3.40283		-0.179995	0.0667778	-0.0566084		-0.157995	0.0887778	-0.0346084		-0.244822	0.00195051	-0.121436
55_Benzene-MeOH_OH-pi_0.95_dimer.out	-347.518	55_Benzene-MeOH_OH-pi_0.95_cpA.out	-115.599	55_Benzene-MeOH_OH-pi_0.95_cpB.out	-231.913	55_Benzene-MeOH_OH-pi_1.00_monomerA.out	-231.913	55_Benzene-MeOH_OH-pi_1.00_monomerB.out	-115.599		3.83172	4.04209	3.9369		3.95	3.941	4.01384		-0.118279	0.0920883	-0.0130955		-0.109279	0.101088	-0.00409548		-0.182116	0.0282514	-0.0769323
55_Benzene-MeOH_OH-pi_1.00_dimer.out	-347.518	55_Benzene-MeOH_OH-pi_1.00_cpA.out	-115.599	55_Benzene-MeOH_OH-pi_1.00_cpB.out	-231.913	55_Benzene-MeOH_OH-pi_1.00_monomerA.out	-231.913	55_Benzene-MeOH_OH-pi_1.00_monomerB.out	-115.599		4.0263	4.20682	4.11656		4.106	4.106	4.16759		-0.0796979	0.100817	0.0105596		-0.0796979	0.100817	0.0105596		-0.14129	0.0392254	-0.0510321
55_Benzene-MeOH_OH-pi_1.05_dimer.out	-347.518	55_Benzene-MeOH_OH-pi_1.05_cpA.out	-115.599	55_Benzene-MeOH_OH-pi_1.05_cpB.out	-231.913	55_Benzene-MeOH_OH-pi_1.00_monomerA.out	-231.913	55_Benzene-MeOH_OH-pi_1.00_monomerB.out	-115.599		3.93941	4.09339	4.0164		3.998	4.005	4.05688		-0.0585922	0.0953945	0.0184012		-0.0655922	0.0883945	0.0114012		-0.117468	0.0365186	-0.0404748
55_Benzene-MeOH_OH-pi_1.10_dimer.out	-347.517	55_Benzene-MeOH_OH-pi_1.10_cpA.out	-115.599	55_Benzene-MeOH_OH-pi_1.10_cpB.out	-231.913	55_Benzene-MeOH_OH-pi_1.00_monomerA.out	-231.913	55_Benzene-MeOH_OH-pi_1.00_monomerB.out	-115.599		3.6988	3.83185	3.76532		3.749	3.76	3.80401		-0.050203	0.0828457	0.0163213		-0.061203	0.0718457	0.00532135		-0.105217	0.0278316	-0.0386927
55_Benzene-MeOH_OH-pi_1.25_dimer.out	-347.516	55_Benzene-MeOH_OH-pi_1.25_cpA.out	-115.599	55_Benzene-MeOH_OH-pi_1.25_cpB.out	-231.913	55_Benzene-MeOH_OH-pi_1.00_monomerA.out	-231.913	55_Benzene-MeOH_OH-pi_1.00_monomerB.out	-115.599		2.7117	2.79744	2.75457		2.774	2.786	2.81332		-0.0623042	0.0234382	-0.019433		-0.0743042	0.0114382	-0.031433		-0.101627	-0.015885	-0.0587562
55_Benzene-MeOH_OH-pi_1.50_dimer.out	-347.513	55_Benzene-MeOH_OH-pi_1.50_cpA.out	-115.599	55_Benzene-MeOH_OH-pi_1.50_cpB.out	-231.913	55_Benzene-MeOH_OH-pi_1.00_monomerA.out	-231.913	55_Benzene-MeOH_OH-pi_1.00_monomerB.out	-115.599		1.43608	1.4803	1.45819		1.524	1.529	1.54163		-0.0879211	-0.0437036	-0.0658124		-0.0929211	-0.0487036	-0.0708124		-0.105556	-0.0613385	-0.0834472
55_Benzene-MeOH_OH-pi_2.00_dimer.out	-347.512	55_Benzene-MeOH_OH-pi_2.00_cpA.out	-115.599	55_Benzene-MeOH_OH-pi_2.00_cpB.out	-231.913	55_Benzene-MeOH_OH-pi_1.00_monomerA.out	-231.913	55_Benzene-MeOH_OH-pi_1.00_monomerB.out	-115.599		0.461596	0.473976	0.467786		0.518	0.521	0.525743		-0.0564036	-0.044024	-0.0502138		-0.0594036	-0.047024	-0.0532138		-0.064147	-0.0517674	-0.0579572
56_Benzene-MeNH2_NH-pi_0.90_dimer.out	-327.654	56_Benzene-MeNH2_NH-pi_0.90_cpA.out	-95.7375	56_Benzene-MeNH2_NH-pi_0.90_cpB.out	-231.913	56_Benzene-MeNH2_NH-pi_1.00_monomerA.out	-231.913	56_Benzene-MeNH2_NH-pi_1.00_monomerB.out	-95.7373		2.24214	2.46525	2.35369		2.381	2.376	2.45699		-0.138865	0.0842521	-0.0273062		-0.133865	0.0892521	-0.0223062		-0.214854	0.00826302	-0.103295
56_Benzene-MeNH2_NH-pi_0.95_dimer.out	-327.655	56_Benzene-MeNH2_NH-pi_0.95_cpA.out	-95.7374	56_Benzene-MeNH2_NH-pi_0.95_cpB.out	-231.913	56_Benzene-MeNH2_NH-pi_1.00_monomerA.out	-231.913	56_Benzene-MeNH2_NH-pi_1.00_monomerB.out	-95.7373		2.89106	3.08034	2.9857		2.977	2.983	3.05074		-0.0859447	0.103343	0.00869906		-0.0919447	0.0973429	0.00269906		-0.159685	0.0296023	-0.0650415
56_Benzene-MeNH2_NH-pi_1.00_dimer.out	-327.655	56_Benzene-MeNH2_NH-pi_1.00_cpA.out	-95.7374	56_Benzene-MeNH2_NH-pi_1.00_cpB.out	-231.913	56_Benzene-MeNH2_NH-pi_1.00_monomerA.out	-231.913	56_Benzene-MeNH2_NH-pi_1.00_monomerB.out	-95.7373		3.08378	3.24499	3.16439		3.139	3.153	3.20933		-0.0552166	0.105987	0.0253853		-0.0692166	0.0919872	0.0113853		-0.125546	0.0356575	-0.0449444
56_Benzene-MeNH2_NH-pi_1.05_dimer.out	-327.655	56_Benzene-MeNH2_NH-pi_1.05_cpA.out	-95.7374	56_Benzene-MeNH2_NH-pi_1.05_cpB.out	-231.913	56_Benzene-MeNH2_NH-pi_1.00_monomerA.out	-231.913	56_Benzene-MeNH2_NH-pi_1.00_monomerB.out	-95.7373		3.00313	3.13741	3.07027		3.044	3.062	3.10912		-0.040871	0.0934082	0.0262686		-0.058871	0.0754082	0.00826863		-0.105994	0.0282856	-0.0388539
56_Benzene-MeNH2_NH-pi_1.10_dimer.out	-327.654	56_Benzene-MeNH2_NH-pi_1.10_cpA.out	-95.7374	56_Benzene-MeNH2_NH-pi_1.10_cpB.out	-231.913	56_Benzene-MeNH2_NH-pi_1.00_monomerA.out	-231.913	56_Benzene-MeNH2_NH-pi_1.00_monomerB.out	-95.7373		2.76414	2.87622	2.82018		2.803	2.823	2.86149		-0.0388644	0.0732222	0.0171789		-0.0588644	0.0532222	-0.00282108		-0.0973553	0.0147313	-0.041312
56_Benzene-MeNH2_NH-pi_1.25_dimer.out	-327.653	56_Benzene-MeNH2_NH-pi_1.25_cpA.out	-95.7374	56_Benzene-MeNH2_NH-pi_1.25_cpB.out	-231.913	56_Benzene-MeNH2_NH-pi_1.00_monomerA.out	-231.913	56_Benzene-MeNH2_NH-pi_1.00_monomerB.out	-95.7373		1.86213	1.9303	1.89622		1.922	1.939	1.96023		-0.0598666	0.00829915	-0.0257837		-0.0768666	-0.00870085	-0.0427837		-0.0980954	-0.0299296	-0.0640125
56_Benzene-MeNH2_NH-pi_1.50_dimer.out	-327.651	56_Benzene-MeNH2_NH-pi_1.50_cpA.out	-95.7373	56_Benzene-MeNH2_NH-pi_1.50_cpB.out	-231.913	56_Benzene-MeNH2_NH-pi_1.00_monomerA.out	-231.913	56_Benzene-MeNH2_NH-pi_1.00_monomerB.out	-95.7373		0.855344	0.887426	0.871385		0.933	0.941	0.950967		-0.0776561	-0.0455739	-0.061615		-0.0856561	-0.0535739	-0.069615		-0.0956234	-0.0635413	-0.0795824
56_Benzene-MeNH2_NH-pi_2.00_dimer.out	-327.65	56_Benzene-MeNH2_NH-pi_2.00_cpA.out	-95.7373	56_Benzene-MeNH2_NH-pi_2.00_cpB.out	-231.913	56_Benzene-MeNH2_NH-pi_1.00_monomerA.out	-231.913	56_Benzene-MeNH2_NH-pi_1.00_monomerB.out	-95.7373		0.226656	0.235383	0.23102		0.26	0.264	0.267291		-0.0333435	-0.0246168	-0.0289801		-0.0373435	-0.0286168	-0.0329801		-0.0406347	-0.0319079	-0.0362713
57_Benzene-Peptide_NH-pi_0.90_dimer.out	-480.147	57_Benzene-Peptide_NH-pi_0.90_cpA.out	-248.229	57_Benzene-Peptide_NH-pi_0.90_cpB.out	-231.913	57_Benzene-Peptide_NH-pi_1.00_monomerA.out	-231.913	57_Benzene-Peptide_NH-pi_1.00_monomerB.out	-248.229		3.29275	3.65738	3.47506		3.595	3.62	3.75648		-0.302253	0.0623799	-0.119936		-0.327253	0.0373799	-0.144936		-0.463732	-0.0990998	-0.281416
57_Benzene-Peptide_NH-pi_0.95_dimer.out	-480.149	57_Benzene-Peptide_NH-pi_0.95_cpA.out	-248.229	57_Benzene-Peptide_NH-pi_0.95_cpB.out	-231.913	57_Benzene-Peptide_NH-pi_1.00_monomerA.out	-231.913	57_Benzene-Peptide_NH-pi_1.00_monomerB.out	-248.229		4.62617	4.93006	4.77811		4.828	4.866	4.97835		-0.201834	0.10206	-0.0498867		-0.239834	0.0640605	-0.0878867		-0.352182	-0.0482879	-0.200235
57_Benzene-Peptide_NH-pi_1.00_dimer.out	-480.15	57_Benzene-Peptide_NH-pi_1.00_cpA.out	-248.229	57_Benzene-Peptide_NH-pi_1.00_cpB.out	-231.913	57_Benzene-Peptide_NH-pi_1.00_monomerA.out	-231.913	57_Benzene-Peptide_NH-pi_1.00_monomerB.out	-248.229		5.03329	5.28824	5.16076		5.176	5.22	5.31335		-0.142714	0.112238	-0.0152379		-0.186714	0.0682385	-0.0592379		-0.280061	-0.0251079	-0.152584
57_Benzene-Peptide_NH-pi_1.05_dimer.out	-480.15	57_Benzene-Peptide_NH-pi_1.05_cpA.out	-248.229	57_Benzene-Peptide_NH-pi_1.05_cpB.out	-231.913	57_Benzene-Peptide_NH-pi_1.00_monomerA.out	-231.913	57_Benzene-Peptide_NH-pi_1.00_monomerB.out	-248.229		4.94669	5.16147	5.05408		5.059	5.105	5.18284		-0.112311	0.102473	-0.00491877		-0.158311	0.0564733	-0.0509188		-0.236146	-0.0213619	-0.128754
57_Benzene-Peptide_NH-pi_1.10_dimer.out	-480.149	57_Benzene-Peptide_NH-pi_1.10_cpA.out	-248.229	57_Benzene-Peptide_NH-pi_1.10_cpB.out	-231.913	57_Benzene-Peptide_NH-pi_1.00_monomerA.out	-231.913	57_Benzene-Peptide_NH-pi_1.00_monomerB.out	-248.229		4.61531	4.79588	4.7056		4.715	4.759	4.82458		-0.09969	0.0808841	-0.00940294		-0.14369	0.0368841	-0.0534029		-0.209273	-0.0286991	-0.118986
57_Benzene-Peptide_NH-pi_1.25_dimer.out	-480.147	57_Benzene-Peptide_NH-pi_1.25_cpA.out	-248.229	57_Benzene-Peptide_NH-pi_1.25_cpB.out	-231.913	57_Benzene-Peptide_NH-pi_1.00_monomerA.out	-231.913	57_Benzene-Peptide_NH-pi_1.00_monomerB.out	-248.229		3.27503	3.38604	3.33054		3.384	3.419	3.45789		-0.108967	0.00204421	-0.0534616		-0.143967	-0.0329558	-0.0884616		-0.182858	-0.0718465	-0.127352
57_Benzene-Peptide_NH-pi_1.50_dimer.out	-480.144	57_Benzene-Peptide_NH-pi_1.50_cpA.out	-248.229	57_Benzene-Peptide_NH-pi_1.50_cpB.out	-231.913	57_Benzene-Peptide_NH-pi_1.00_monomerA.out	-231.913	57_Benzene-Peptide_NH-pi_1.00_monomerB.out	-248.229		1.67683	1.73175	1.70429		1.799	1.818	1.83675		-0.122169	-0.0672528	-0.0947107		-0.141169	-0.0862528	-0.113711		-0.159915	-0.104999	-0.132457
57_Benzene-Peptide_NH-pi_2.00_dimer.out	-480.142	57_Benzene-Peptide_NH-pi_2.00_cpA.out	-248.229	57_Benzene-Peptide_NH-pi_2.00_cpB.out	-231.913	57_Benzene-Peptide_NH-pi_1.00_monomerA.out	-231.913	57_Benzene-Peptide_NH-pi_1.00_monomerB.out	-248.229		0.556251	0.571562	0.563906		0.619	0.626	0.632287		-0.0627494	-0.047438	-0.0550937		-0.0697494	-0.054438	-0.0620937		-0.0760367	-0.0607253	-0.068381
58_Pyridine-Pyridine_CH-N_0.90_dimer.out	-495.89	58_Pyridine-Pyridine_CH-N_0.90_cpA.out	-247.943	58_Pyridine-Pyridine_CH-N_0.90_cpB.out	-247.943	58_Pyridine-Pyridine_CH-N_1.00_monomerA.out	-247.943	58_Pyridine-Pyridine_CH-N_1.00_monomerB.out	-247.943		2.75356	2.99202	2.87279		2.884	2.89	2.98855		-0.130437	0.10802	-0.0112086		-0.136437	0.10202	-0.0172086		-0.234985	0.00347095	-0.115757
58_Pyridine-Pyridine_CH-N_0.95_dimer.out	-495.892	58_Pyridine-Pyridine_CH-N_0.95_cpA.out	-247.943	58_Pyridine-Pyridine_CH-N_0.95_cpB.out	-247.943	58_Pyridine-Pyridine_CH-N_1.00_monomerA.out	-247.943	58_Pyridine-Pyridine_CH-N_1.00_monomerB.out	-247.943		3.80678	4.00639	3.90659		3.869	3.887	3.9696		-0.0622208	0.137394	0.0375865		-0.0802208	0.119394	0.0195865		-0.162818	0.0367963	-0.0630111
58_Pyridine-Pyridine_CH-N_1.00_dimer.out	-495.893	58_Pyridine-Pyridine_CH-N_1.00_cpA.out	-247.943	58_Pyridine-Pyridine_CH-N_1.00_cpB.out	-247.943	58_Pyridine-Pyridine_CH-N_1.00_monomerA.out	-247.943	58_Pyridine-Pyridine_CH-N_1.00_monomerB.out	-247.943		4.17326	4.33033	4.25179		4.166	4.194	4.25883		0.00726372	0.164326	0.0857949		-0.0207363	0.136326	0.0577949		-0.0855668	0.0714955	-0.00703566
58_Pyridine-Pyridine_CH-N_1.05_dimer.out	-495.892	58_Pyridine-Pyridine_CH-N_1.05_cpA.out	-247.943	58_Pyridine-Pyridine_CH-N_1.05_cpB.out	-247.943	58_Pyridine-Pyridine_CH-N_1.00_monomerA.out	-247.943	58_Pyridine-Pyridine_CH-N_1.00_monomerB.out	-247.943		3.93465	4.06348	3.99906		3.89	3.921	3.97335		0.0446469	0.173482	0.109064		0.0136469	0.142482	0.0780642		-0.0387041	0.0901305	0.0257132
58_Pyridine-Pyridine_CH-N_1.10_dimer.out	-495.891	58_Pyridine-Pyridine_CH-N_1.10_cpA.out	-247.943	58_Pyridine-Pyridine_CH-N_1.10_cpB.out	-247.943	58_Pyridine-Pyridine_CH-N_1.00_monomerA.out	-247.943	58_Pyridine-Pyridine_CH-N_1.00_monomerB.out	-247.943		3.50411	3.61058	3.55735		3.442	3.474	3.51736		0.0621121	0.16858	0.115346		0.0301121	0.13658	0.0833458		-0.0132458	0.0932217	0.039988
58_Pyridine-Pyridine_CH-N_1.25_dimer.out	-495.889	58_Pyridine-Pyridine_CH-N_1.25_cpA.out	-247.943	58_Pyridine-Pyridine_CH-N_1.25_cpB.out	-247.943	58_Pyridine-Pyridine_CH-N_1.00_monomerA.out	-247.943	58_Pyridine-Pyridine_CH-N_1.00_monomerB.out	-247.943		2.22951	2.29454	2.26202		2.173	2.199	2.22589		0.0565061	0.121543	0.0890245		0.0305061	0.0955429	0.0630245		0.00361238	0.0686492	0.0361308
58_Pyridine-Pyridine_CH-N_1.50_dimer.out	-495.887	58_Pyridine-Pyridine_CH-N_1.50_cpA.out	-247.943	58_Pyridine-Pyridine_CH-N_1.50_cpB.out	-247.943	58_Pyridine-Pyridine_CH-N_1.00_monomerA.out	-247.943	58_Pyridine-Pyridine_CH-N_1.00_monomerB.out	-247.943		1.03728	1.07277	1.05503		1.005	1.025	1.04091		0.0322794	0.0677742	0.0500268		0.0122794	0.0477742	0.0300268		-0.00362729	0.0318675	0.0141201
58_Pyridine-Pyridine_CH-N_2.00_dimer.out	-495.886	58_Pyridine-Pyridine_CH-N_2.00_cpA.out	-247.943	58_Pyridine-Pyridine_CH-N_2.00_cpB.out	-247.943	58_Pyridine-Pyridine_CH-N_1.00_monomerA.out	-247.943	58_Pyridine-Pyridine_CH-N_1.00_monomerB.out	-247.943		0.29423	0.304669	0.29945		0.274	0.281	0.287246		0.0202303	0.030669	0.0254496		0.0132303	0.023669	0.0184496		0.00698434	0.017423	0.0122037
59_Ethyne-Water_CH-O_0.90_dimer.out	-153.588	59_Ethyne-Water_CH-O_0.90_cpA.out	-76.3632	59_Ethyne-Water_CH-O_0.90_cpB.out	-77.2209	59_Ethyne-Water_CH-O_1.00_monomerA.out	-77.2209	59_Ethyne-Water_CH-O_1.00_monomerB.out	-76.3631		2.54464	2.64658	2.59561		2.604	2.573	2.60809		-0.059358	0.0425836	-0.00838717		-0.028358	0.0735836	0.0226128		-0.063448	0.0384936	-0.0124772
59_Ethyne-Water_CH-O_0.95_dimer.out	-153.589	59_Ethyne-Water_CH-O_0.95_cpA.out	-76.3632	59_Ethyne-Water_CH-O_0.95_cpB.out	-77.2209	59_Ethyne-Water_CH-O_1.00_monomerA.out	-77.2209	59_Ethyne-Water_CH-O_1.00_monomerB.out	-76.3631		2.82447	2.91205	2.86826		2.865	2.844	2.87259		-0.0405289	0.0470531	0.0032621		-0.0195289	0.0680531	0.0242621		-0.0481152	0.0394669	-0.00432417
59_Ethyne-Water_CH-O_1.00_dimer.out	-153.589	59_Ethyne-Water_CH-O_1.00_cpA.out	-76.3632	59_Ethyne-Water_CH-O_1.00_cpB.out	-77.2209	59_Ethyne-Water_CH-O_1.00_monomerA.out	-77.2209	59_Ethyne-Water_CH-O_1.00_monomerB.out	-76.3631		2.87209	2.9476	2.90985		2.899	2.883	2.90708		-0.0269061	0.0485962	0.010845		-0.0109061	0.0645962	0.026845		-0.0349895	0.0405128	0.00276168
59_Ethyne-Water_CH-O_1.05_dimer.out	-153.589	59_Ethyne-Water_CH-O_1.05_cpA.out	-76.3632	59_Ethyne-Water_CH-O_1.05_cpB.out	-77.2209	59_Ethyne-Water_CH-O_1.00_monomerA.out	-77.2209	59_Ethyne-Water_CH-O_1.00_monomerB.out	-76.3631		2.78221	2.84793	2.81507		2.799	2.788	2.80691		-0.0167918	0.0489253	0.0160667		-0.00579181	0.0599253	0.0270667		-0.024703	0.0410141	0.00815556
59_Ethyne-Water_CH-O_1.10_dimer.out	-153.588	59_Ethyne-Water_CH-O_1.10_cpA.out	-76.3632	59_Ethyne-Water_CH-O_1.10_cpB.out	-77.2209	59_Ethyne-Water_CH-O_1.00_monomerA.out	-77.2209	59_Ethyne-Water_CH-O_1.00_monomerB.out	-76.3631		2.6169	2.67483	2.64587		2.628	2.618	2.6342		-0.0110958	0.0468271	0.0178656		-0.00109581	0.0568271	0.0278656		-0.0172932	0.0406297	0.0116682
59_Ethyne-Water_CH-O_1.25_dimer.out	-153.587	59_Ethyne-Water_CH-O_1.25_cpA.out	-76.3632	59_Ethyne-Water_CH-O_1.25_cpB.out	-77.2209	59_Ethyne-Water_CH-O_1.00_monomerA.out	-77.2209	59_Ethyne-Water_CH-O_1.00_monomerB.out	-76.3631		1.99342	2.03479	2.0141		1.999	1.994	2.00295		-0.00558452	0.0357905	0.015103		-0.000584521	0.0407905	0.020103		-0.00953349	0.0318415	0.011154
59_Ethyne-Water_CH-O_1.50_dimer.out	-153.586	59_Ethyne-Water_CH-O_1.50_cpA.out	-76.3631	59_Ethyne-Water_CH-O_1.50_cpB.out	-77.2209	59_Ethyne-Water_CH-O_1.00_monomerA.out	-77.2209	59_Ethyne-Water_CH-O_1.00_monomerB.out	-76.3631		1.16935	1.1948	1.18207		1.178	1.177	1.18234		-0.00865255	0.0167988	0.0040731		-0.00765255	0.0177988	0.0050731		-0.0129893	0.012462	-0.000263623
59_Ethyne-Water_CH-O_2.00_dimer.out	-153.585	59_Ethyne-Water_CH-O_2.00_cpA.out	-76.3631	59_Ethyne-Water_CH-O_2.00_cpB.out	-77.2209	59_Ethyne-Water_CH-O_1.00_monomerA.out	-77.2209	59_Ethyne-Water_CH-O_1.00_monomerB.out	-76.3631		0.459729	0.471021	0.465375		0.461	0.46	0.461369		-0.0012712	0.0100208	0.0043748		-0.000271199	0.0110208	0.0053748		-0.00164041	0.00965158	0.00400559
60_Ethyne-AcOH_OH-pi_0.90_dimer.out	-306.075	60_Ethyne-AcOH_OH-pi_0.90_cpA.out	-228.847	60_Ethyne-AcOH_OH-pi_0.90_cpB.out	-77.2209	60_Ethyne-AcOH_OH-pi_1.00_monomerA.out	-77.2208	60_Ethyne-AcOH_OH-pi_1.00_monomerB.out	-228.847		4.28661	4.4473	4.36696		4.306	4.295	4.36371		-0.0193852	0.141299	0.0609568		-0.00838519	0.152299	0.0719568		-0.0770942	0.0835896	0.00324771
60_Ethyne-AcOH_OH-pi_0.95_dimer.out	-306.076	60_Ethyne-AcOH_OH-pi_0.95_cpA.out	-228.847	60_Ethyne-AcOH_OH-pi_0.95_cpB.out	-77.2209	60_Ethyne-AcOH_OH-pi_1.00_monomerA.out	-77.2208	60_Ethyne-AcOH_OH-pi_1.00_monomerB.out	-228.847		4.81193	4.94496	4.87844		4.787	4.788	4.84398		0.0249304	0.157957	0.0914438		0.0239304	0.156957	0.0904438		-0.0320476	0.100979	0.0344658
60_Ethyne-AcOH_OH-pi_1.00_dimer.out	-306.076	60_Ethyne-AcOH_OH-pi_1.00_cpA.out	-228.847	60_Ethyne-AcOH_OH-pi_1.00_cpB.out	-77.2209	60_Ethyne-AcOH_OH-pi_1.00_monomerA.out	-77.2208	60_Ethyne-AcOH_OH-pi_1.00_monomerB.out	-228.847		4.90987	5.02135	4.96561		4.854	4.863	4.90792		0.0558714	0.16735	0.111611		0.0468714	0.15835	0.102611		0.00194673	0.113425	0.0576859
60_Ethyne-AcOH_OH-pi_1.05_dimer.out	-306.075	60_Ethyne-AcOH_OH-pi_1.05_cpA.out	-228.847	60_Ethyne-AcOH_OH-pi_1.05_cpB.out	-77.2209	60_Ethyne-AcOH_OH-pi_1.00_monomerA.out	-77.2208	60_Ethyne-AcOH_OH-pi_1.00_monomerB.out	-228.847		4.75245	4.84689	4.79967		4.679	4.692	4.72711		0.0734528	0.167886	0.12067		0.0604528	0.154886	0.10767		0.0253421	0.119776	0.072559
60_Ethyne-AcOH_OH-pi_1.10_dimer.out	-306.075	60_Ethyne-AcOH_OH-pi_1.10_cpA.out	-228.847	60_Ethyne-AcOH_OH-pi_1.10_cpB.out	-77.2209	60_Ethyne-AcOH_OH-pi_1.00_monomerA.out	-77.2208	60_Ethyne-AcOH_OH-pi_1.00_monomerB.out	-228.847		4.45305	4.53392	4.49349		4.371	4.385	4.41354		0.0820548	0.162917	0.122486		0.0680548	0.148917	0.108486		0.0395159	0.120378	0.0799469
60_Ethyne-AcOH_OH-pi_1.25_dimer.out	-306.073	60_Ethyne-AcOH_OH-pi_1.25_cpA.out	-228.847	60_Ethyne-AcOH_OH-pi_1.25_cpB.out	-77.2209	60_Ethyne-AcOH_OH-pi_1.00_monomerA.out	-77.2208	60_Ethyne-AcOH_OH-pi_1.00_monomerB.out	-228.847		3.30505	3.35765	3.33135		3.234	3.248	3.26262		0.0710464	0.123654	0.0973503		0.0570464	0.109654	0.0833503		0.0424233	0.0950313	0.0687273
60_Ethyne-AcOH_OH-pi_1.50_dimer.out	-306.071	60_Ethyne-AcOH_OH-pi_1.50_cpA.out	-228.847	60_Ethyne-AcOH_OH-pi_1.50_cpB.out	-77.2208	60_Ethyne-AcOH_OH-pi_1.00_monomerA.out	-77.2208	60_Ethyne-AcOH_OH-pi_1.00_monomerB.out	-228.847		1.78551	1.81306	1.79928		1.76	1.769	1.77638		0.0255112	0.0530564	0.0392838		0.0165112	0.0440564	0.0302838		0.00913345	0.0366786	0.022906
60_Ethyne-AcOH_OH-pi_2.00_dimer.out	-306.069	60_Ethyne-AcOH_OH-pi_2.00_cpA.out	-228.847	60_Ethyne-AcOH_OH-pi_2.00_cpB.out	-77.2208	60_Ethyne-AcOH_OH-pi_1.00_monomerA.out	-77.2208	60_Ethyne-AcOH_OH-pi_1.00_monomerB.out	-228.847		0.559017	0.567961	0.563489		0.556	0.557	0.559371		0.00301694	0.0119614	0.00748918		0.00201694	0.0109614	0.00648918		-0.000354392	0.0085901	0.00411785
61_Pentane-AcOH_0.90_dimer.out	-426.331	61_Pentane-AcOH_0.90_cpA.out	-228.847	61_Pentane-AcOH_0.90_cpB.out	-197.48	61_Pentane-AcOH_1.00_monomerA.out	-197.48	61_Pentane-AcOH_1.00_monomerB.out	-228.847		2.14977	2.40201	2.27589		2.629	2.642	2.74138		-0.479233	-0.22699	-0.353112		-0.492233	-0.23999	-0.366112		-0.591613	-0.33937	-0.465491
61_Pentane-AcOH_0.95_dimer.out	-426.331	61_Pentane-AcOH_0.95_cpA.out	-228.847	61_Pentane-AcOH_0.95_cpB.out	-197.48	61_Pentane-AcOH_1.00_monomerA.out	-197.48	61_Pentane-AcOH_1.00_monomerB.out	-228.847		2.43717	2.65679	2.54698		2.835	2.852	2.93781		-0.397827	-0.178207	-0.288017		-0.414827	-0.195207	-0.305017		-0.500637	-0.281018	-0.390827
61_Pentane-AcOH_1.00_dimer.out	-426.331	61_Pentane-AcOH_1.00_cpA.out	-228.847	61_Pentane-AcOH_1.00_cpB.out	-197.48	61_Pentane-AcOH_1.00_monomerA.out	-197.48	61_Pentane-AcOH_1.00_monomerB.out	-228.847		2.47994	2.67297	2.57646		2.82	2.839	2.91301		-0.340056	-0.147025	-0.243541		-0.359056	-0.166025	-0.262541		-0.433071	-0.24004	-0.336555
61_Pentane-AcOH_1.05_dimer.out	-426.331	61_Pentane-AcOH_1.05_cpA.out	-228.847	61_Pentane-AcOH_1.05_cpB.out	-197.48	61_Pentane-AcOH_1.00_monomerA.out	-197.48	61_Pentane-AcOH_1.00_monomerB.out	-228.847		2.37768	2.54827	2.46298		2.677	2.697	2.76125		-0.299315	-0.12873	-0.214022		-0.319315	-0.14873	-0.234022		-0.383561	-0.212975	-0.298268
61_Pentane-AcOH_1.10_dimer.out	-426.331	61_Pentane-AcOH_1.10_cpA.out	-228.847	61_Pentane-AcOH_1.10_cpB.out	-197.48	61_Pentane-AcOH_1.00_monomerA.out	-197.48	61_Pentane-AcOH_1.00_monomerB.out	-228.847		2.19571	2.34589	2.2708		2.467	2.488	2.5436		-0.27129	-0.121111	-0.196201		-0.29229	-0.142111	-0.217201		-0.347893	-0.197714	-0.272804
61_Pentane-AcOH_1.25_dimer.out	-426.33	61_Pentane-AcOH_1.25_cpA.out	-228.847	61_Pentane-AcOH_1.25_cpB.out	-197.48	61_Pentane-AcOH_1.00_monomerA.out	-197.48	61_Pentane-AcOH_1.00_monomerB.out	-228.847		1.52327	1.62424	1.57376		1.757	1.775	1.81196		-0.233732	-0.132756	-0.183244		-0.251732	-0.150756	-0.201244		-0.28869	-0.187714	-0.238202
61_Pentane-AcOH_1.50_dimer.out	-426.328	61_Pentane-AcOH_1.50_cpA.out	-228.847	61_Pentane-AcOH_1.50_cpB.out	-197.48	61_Pentane-AcOH_1.00_monomerA.out	-197.48	61_Pentane-AcOH_1.00_monomerB.out	-228.847		0.57589	0.624285	0.600088		0.773	0.784	0.802397		-0.19711	-0.148715	-0.172912		-0.20811	-0.159715	-0.183912		-0.226507	-0.178112	-0.202309
61_Pentane-AcOH_2.00_dimer.out	-426.327	61_Pentane-AcOH_2.00_cpA.out	-228.847	61_Pentane-AcOH_2.00_cpB.out	-197.48	61_Pentane-AcOH_1.00_monomerA.out	-197.48	61_Pentane-AcOH_1.00_monomerB.out	-228.847		0.0536692	0.0655094	0.0595893		0.166	0.171	0.177279		-0.112331	-0.100491	-0.106411		-0.117331	-0.105491	-0.111411		-0.12361	-0.11177	-0.11769
62_Pentane-AcNH2_0.90_dimer.out	-406.464	62_Pentane-AcNH2_0.90_cpA.out	-208.98	62_Pentane-AcNH2_0.90_cpB.out	-197.48	62_Pentane-AcNH2_1.00_monomerA.out	-197.48	62_Pentane-AcNH2_1.00_monomerB.out	-208.98		2.49895	2.76947	2.63421		3.074	3.079	3.19348		-0.575046	-0.30453	-0.439788		-0.580046	-0.30953	-0.444788		-0.694522	-0.424005	-0.559263
62_Pentane-AcNH2_0.95_dimer.out	-406.465	62_Pentane-AcNH2_0.95_cpA.out	-208.98	62_Pentane-AcNH2_0.95_cpB.out	-197.48	62_Pentane-AcNH2_1.00_monomerA.out	-197.48	62_Pentane-AcNH2_1.00_monomerB.out	-208.98		2.968	3.2005	3.08425		3.426	3.442	3.53833		-0.458004	-0.225505	-0.341754		-0.474004	-0.241505	-0.357754		-0.570334	-0.337835	-0.454085
62_Pentane-AcNH2_1.00_dimer.out	-406.465	62_Pentane-AcNH2_1.00_cpA.out	-208.98	62_Pentane-AcNH2_1.00_cpB.out	-197.48	62_Pentane-AcNH2_1.00_monomerA.out	-197.48	62_Pentane-AcNH2_1.00_monomerB.out	-208.98		3.05985	3.25932	3.15958		3.437	3.458	3.53992		-0.377154	-0.177683	-0.277418		-0.398154	-0.198683	-0.298418		-0.480074	-0.280603	-0.380338
62_Pentane-AcNH2_1.05_dimer.out	-406.465	62_Pentane-AcNH2_1.05_cpA.out	-208.98	62_Pentane-AcNH2_1.05_cpB.out	-197.48	62_Pentane-AcNH2_1.00_monomerA.out	-197.48	62_Pentane-AcNH2_1.00_monomerB.out	-208.98		2.93658	3.10865	3.02262		3.259	3.283	3.35251		-0.32242	-0.150346	-0.236383		-0.34642	-0.174346	-0.260383		-0.415927	-0.243853	-0.32989
62_Pentane-AcNH2_1.10_dimer.out	-406.465	62_Pentane-AcNH2_1.10_cpA.out	-208.98	62_Pentane-AcNH2_1.10_cpB.out	-197.48	62_Pentane-AcNH2_1.00_monomerA.out	-197.48	62_Pentane-AcNH2_1.00_monomerB.out	-208.98		2.70111	2.85059	2.77585		2.988	3.013	3.07219		-0.286888	-0.137407	-0.212147		-0.311888	-0.162407	-0.237147		-0.37108	-0.2216	-0.29634
62_Pentane-AcNH2_1.25_dimer.out	-406.463	62_Pentane-AcNH2_1.25_cpA.out	-208.98	62_Pentane-AcNH2_1.25_cpB.out	-197.48	62_Pentane-AcNH2_1.00_monomerA.out	-197.48	62_Pentane-AcNH2_1.00_monomerB.out	-208.98		1.84009	1.93728	1.88869		2.078	2.102	2.14015		-0.237908	-0.140722	-0.189315		-0.261908	-0.164722	-0.213315		-0.300057	-0.202871	-0.251464
62_Pentane-AcNH2_1.50_dimer.out	-406.461	62_Pentane-AcNH2_1.50_cpA.out	-208.98	62_Pentane-AcNH2_1.50_cpB.out	-197.48	62_Pentane-AcNH2_1.00_monomerA.out	-197.48	62_Pentane-AcNH2_1.00_monomerB.out	-208.98		0.822856	0.873368	0.848112		1.025	1.041	1.06071		-0.202144	-0.151632	-0.176888		-0.218144	-0.167632	-0.192888		-0.237856	-0.187344	-0.2126
62_Pentane-AcNH2_2.00_dimer.out	-406.46	62_Pentane-AcNH2_2.00_cpA.out	-208.98	62_Pentane-AcNH2_2.00_cpB.out	-197.48	62_Pentane-AcNH2_1.00_monomerA.out	-197.48	62_Pentane-AcNH2_1.00_monomerB.out	-208.98		0.158053	0.173628	0.165841		0.268	0.276	0.283102		-0.109947	-0.0943718	-0.102159		-0.117947	-0.102372	-0.110159		-0.125049	-0.109474	-0.117261
63_Benzene-AcOH_0.90_dimer.out	-460.764	63_Benzene-AcOH_0.90_cpA.out	-228.847	63_Benzene-AcOH_0.90_cpB.out	-231.913	63_Benzene-AcOH_1.00_monomerA.out	-231.913	63_Benzene-AcOH_1.00_monomerB.out	-228.847		2.27727	2.62368	2.45048		2.547	2.574	2.69145		-0.269726	0.0766846	-0.0965208		-0.296726	0.0496846	-0.123521		-0.41418	-0.0677695	-0.240975
63_Benzene-AcOH_0.95_dimer.out	-460.765	63_Benzene-AcOH_0.95_cpA.out	-228.847	63_Benzene-AcOH_0.95_cpB.out	-231.913	63_Benzene-AcOH_1.00_monomerA.out	-231.913	63_Benzene-AcOH_1.00_monomerB.out	-228.847		3.26187	3.55387	3.40787		3.444	3.483	3.58124		-0.182129	0.109872	-0.0361282		-0.221129	0.0708722	-0.0751282		-0.319365	-0.0273644	-0.173365
63_Benzene-AcOH_1.00_dimer.out	-460.765	63_Benzene-AcOH_1.00_cpA.out	-228.847	63_Benzene-AcOH_1.00_cpB.out	-231.913	63_Benzene-AcOH_1.00_monomerA.out	-231.913	63_Benzene-AcOH_1.00_monomerB.out	-228.847		3.53649	3.78233	3.65941		3.671	3.715	3.79787		-0.134509	0.11133	-0.0115893		-0.178509	0.06733	-0.0555893		-0.261379	-0.0155404	-0.13846
63_Benzene-AcOH_1.05_dimer.out	-460.765	63_Benzene-AcOH_1.05_cpA.out	-228.847	63_Benzene-AcOH_1.05_cpB.out	-231.913	63_Benzene-AcOH_1.00_monomerA.out	-231.913	63_Benzene-AcOH_1.00_monomerB.out	-228.847		3.433	3.63942	3.53621		3.546	3.591	3.6603		-0.113005	0.0934229	-0.00979085		-0.158005	0.0484229	-0.0547909		-0.227306	-0.0208783	-0.124092
63_Benzene-AcOH_1.10_dimer.out	-460.765	63_Benzene-AcOH_1.10_cpA.out	-228.847	63_Benzene-AcOH_1.10_cpB.out	-231.913	63_Benzene-AcOH_1.00_monomerA.out	-231.913	63_Benzene-AcOH_1.00_monomerB.out	-228.847		3.14453	3.32022	3.23237		3.253	3.296	3.35425		-0.108472	0.0672157	-0.0206283		-0.151472	0.0242157	-0.0636283		-0.209723	-0.0340349	-0.121879
63_Benzene-AcOH_1.25_dimer.out	-460.763	63_Benzene-AcOH_1.25_cpA.out	-228.847	63_Benzene-AcOH_1.25_cpB.out	-231.913	63_Benzene-AcOH_1.00_monomerA.out	-231.913	63_Benzene-AcOH_1.00_monomerB.out	-228.847		2.05966	2.16834	2.114		2.195	2.226	2.26003		-0.135338	-0.0266603	-0.0809991		-0.166338	-0.0576603	-0.111999		-0.200371	-0.0916935	-0.146032
63_Benzene-AcOH_1.50_dimer.out	-460.761	63_Benzene-AcOH_1.50_cpA.out	-228.847	63_Benzene-AcOH_1.50_cpB.out	-231.913	63_Benzene-AcOH_1.00_monomerA.out	-231.913	63_Benzene-AcOH_1.00_monomerB.out	-228.847		0.850839	0.899703	0.875271		1.007	1.024	1.04046		-0.156161	-0.107297	-0.131729		-0.173161	-0.124297	-0.148729		-0.189624	-0.14076	-0.165192
63_Benzene-AcOH_2.00_dimer.out	-460.76	63_Benzene-AcOH_2.00_cpA.out	-228.847	63_Benzene-AcOH_2.00_cpB.out	-231.913	63_Benzene-AcOH_1.00_monomerA.out	-231.913	63_Benzene-AcOH_1.00_monomerB.out	-228.847		0.161564	0.17485	0.168207		0.259	0.265	0.27148		-0.0974362	-0.0841498	-0.090793		-0.103436	-0.0901498	-0.096793		-0.109916	-0.0966301	-0.103273
64_Peptide-Ethene_0.90_dimer.out	-326.705	64_Peptide-Ethene_0.90_cpA.out	-78.4722	64_Peptide-Ethene_0.90_cpB.out	-248.229	64_Peptide-Ethene_1.00_monomerA.out	-248.229	64_Peptide-Ethene_1.00_monomerB.out	-78.4721		2.31	2.49606	2.40303		2.527	2.528	2.59879		-0.217	-0.0309361	-0.123968		-0.218	-0.0319361	-0.124968		-0.288789	-0.102725	-0.195757
64_Peptide-Ethene_0.95_dimer.out	-326.706	64_Peptide-Ethene_0.95_cpA.out	-78.4722	64_Peptide-Ethene_0.95_cpB.out	-248.229	64_Peptide-Ethene_1.00_monomerA.out	-248.229	64_Peptide-Ethene_1.00_monomerB.out	-78.4721		2.73517	2.89185	2.81351		2.881	2.893	2.95201		-0.145833	0.0108472	-0.0674929		-0.157833	-0.00115281	-0.0794929		-0.216842	-0.060162	-0.138502
64_Peptide-Ethene_1.00_dimer.out	-326.706	64_Peptide-Ethene_1.00_cpA.out	-78.4722	64_Peptide-Ethene_1.00_cpB.out	-248.229	64_Peptide-Ethene_1.00_monomerA.out	-248.229	64_Peptide-Ethene_1.00_monomerB.out	-78.4721		2.83003	2.96275	2.89639		2.928	2.945	2.99435		-0.097967	0.0347453	-0.0316109		-0.114967	0.0177453	-0.0486109		-0.164313	-0.0316009	-0.0979571
64_Peptide-Ethene_1.05_dimer.out	-326.706	64_Peptide-Ethene_1.05_cpA.out	-78.4722	64_Peptide-Ethene_1.05_cpB.out	-248.229	64_Peptide-Ethene_1.00_monomerA.out	-248.229	64_Peptide-Ethene_1.00_monomerB.out	-78.4721		2.73304	2.84676	2.7899		2.801	2.82	2.86193		-0.067964	0.0457636	-0.0111002		-0.086964	0.0267636	-0.0301002		-0.128889	-0.0151618	-0.0720256
64_Peptide-Ethene_1.10_dimer.out	-326.705	64_Peptide-Ethene_1.10_cpA.out	-78.4722	64_Peptide-Ethene_1.10_cpB.out	-248.229	64_Peptide-Ethene_1.00_monomerA.out	-248.229	64_Peptide-Ethene_1.00_monomerB.out	-78.4721		2.53535	2.63327	2.58431		2.585	2.605	2.64066		-0.0496473	0.0482679	-0.000689704		-0.0696473	0.0282679	-0.0206897		-0.105306	-0.00739075	-0.0563484
64_Peptide-Ethene_1.25_dimer.out	-326.704	64_Peptide-Ethene_1.25_cpA.out	-78.4722	64_Peptide-Ethene_1.25_cpB.out	-248.229	64_Peptide-Ethene_1.00_monomerA.out	-248.229	64_Peptide-Ethene_1.00_monomerB.out	-78.4721		1.78871	1.8521	1.8204		1.828	1.846	1.8687		-0.0392885	0.0240974	-0.00759556		-0.0572885	0.00609738	-0.0255956		-0.0799863	-0.0166004	-0.0482933
64_Peptide-Ethene_1.50_dimer.out	-326.702	64_Peptide-Ethene_1.50_cpA.out	-78.4721	64_Peptide-Ethene_1.50_cpB.out	-248.229	64_Peptide-Ethene_1.00_monomerA.out	-248.229	64_Peptide-Ethene_1.00_monomerB.out	-78.4721		0.824381	0.855285	0.839833		0.867	0.878	0.8899		-0.0426189	-0.0117148	-0.0271669		-0.0536189	-0.0227148	-0.0381669		-0.0655193	-0.0346153	-0.0500673
64_Peptide-Ethene_2.00_dimer.out	-326.701	64_Peptide-Ethene_2.00_cpA.out	-78.4721	64_Peptide-Ethene_2.00_cpB.out	-248.229	64_Peptide-Ethene_1.00_monomerA.out	-248.229	64_Peptide-Ethene_1.00_monomerB.out	-78.4721		0.184629	0.19199	0.18831		0.188	0.191	0.193792		-0.00337064	0.00398972	0.00030954		-0.00637064	0.00098972	-0.00269046		-0.00916308	-0.00180272	-0.0054829
65_Pyridine-Ethyne_0.90_dimer.out	-325.17	65_Pyridine-Ethyne_0.90_cpA.out	-77.2209	65_Pyridine-Ethyne_0.90_cpB.out	-247.943	65_Pyridine-Ethyne_1.00_monomerA.out	-247.943	65_Pyridine-Ethyne_1.00_monomerB.out	-77.2208		3.79324	3.93648	3.86486		3.661	3.647	3.70059		0.13224	0.27548	0.20386		0.14624	0.28948	0.21786		0.0926457	0.235886	0.164266
65_Pyridine-Ethyne_0.95_dimer.out	-325.17	65_Pyridine-Ethyne_0.95_cpA.out	-77.2209	65_Pyridine-Ethyne_0.95_cpB.out	-247.943	65_Pyridine-Ethyne_1.00_monomerA.out	-247.943	65_Pyridine-Ethyne_1.00_monomerB.out	-77.2208		4.13713	4.25925	4.19819		4.008	4.002	4.04799		0.129131	0.251249	0.19019		0.135131	0.257249	0.19619		0.0891424	0.211261	0.150202
65_Pyridine-Ethyne_1.00_dimer.out	-325.171	65_Pyridine-Ethyne_1.00_cpA.out	-77.2209	65_Pyridine-Ethyne_1.00_cpB.out	-247.943	65_Pyridine-Ethyne_1.00_monomerA.out	-247.943	65_Pyridine-Ethyne_1.00_monomerB.out	-77.2208		4.19081	4.29546	4.24313		4.066	4.065	4.10364		0.124807	0.22946	0.177133		0.125807	0.23046	0.178133		0.0871711	0.191825	0.139498
65_Pyridine-Ethyne_1.05_dimer.out	-325.17	65_Pyridine-Ethyne_1.05_cpA.out	-77.2209	65_Pyridine-Ethyne_1.05_cpB.out	-247.943	65_Pyridine-Ethyne_1.00_monomerA.out	-247.943	65_Pyridine-Ethyne_1.00_monomerB.out	-77.2208		4.06564	4.15601	4.11082		3.946	3.948	3.98042		0.119637	0.210012	0.164825		0.117637	0.208012	0.162825		0.0852132	0.175588	0.130401
65_Pyridine-Ethyne_1.10_dimer.out	-325.17	65_Pyridine-Ethyne_1.10_cpA.out	-77.2209	65_Pyridine-Ethyne_1.10_cpB.out	-247.943	65_Pyridine-Ethyne_1.00_monomerA.out	-247.943	65_Pyridine-Ethyne_1.00_monomerB.out	-77.2208		3.83816	3.91666	3.87741		3.724	3.727	3.75493		0.114156	0.192664	0.15341		0.111156	0.189664	0.15041		0.0832291	0.161736	0.122483
65_Pyridine-Ethyne_1.25_dimer.out	-325.168	65_Pyridine-Ethyne_1.25_cpA.out	-77.2208	65_Pyridine-Ethyne_1.25_cpB.out	-247.943	65_Pyridine-Ethyne_1.00_monomerA.out	-247.943	65_Pyridine-Ethyne_1.00_monomerB.out	-77.2208		2.95623	3.01069	2.98346		2.866	2.87	2.88766		0.0902308	0.144691	0.117461		0.0862308	0.140691	0.113461		0.0685733	0.123034	0.0958037
65_Pyridine-Ethyne_1.50_dimer.out	-325.167	65_Pyridine-Ethyne_1.50_cpA.out	-77.2208	65_Pyridine-Ethyne_1.50_cpB.out	-247.943	65_Pyridine-Ethyne_1.00_monomerA.out	-247.943	65_Pyridine-Ethyne_1.00_monomerB.out	-77.2208		1.73382	1.76558	1.7497		1.679	1.684	1.69428		0.054816	0.0865811	0.0706986		0.049816	0.0815811	0.0656986		0.0395328	0.0712979	0.0554154
65_Pyridine-Ethyne_2.00_dimer.out	-325.165	65_Pyridine-Ethyne_2.00_cpA.out	-77.2208	65_Pyridine-Ethyne_2.00_cpB.out	-247.943	65_Pyridine-Ethyne_1.00_monomerA.out	-247.943	65_Pyridine-Ethyne_1.00_monomerB.out	-77.2208		0.647746	0.659865	0.653805		0.618	0.623	0.627307		0.0297457	0.0418651	0.0358054		0.0247457	0.0368651	0.0308054		0.0204387	0.0325581	0.0264984
66_MeNH2-Pyridine_0.90_dimer.out	-343.686	66_MeNH2-Pyridine_0.90_cpA.out	-247.943	66_MeNH2-Pyridine_0.90_cpB.out	-95.7375	66_MeNH2-Pyridine_1.00_monomerA.out	-95.7373	66_MeNH2-Pyridine_1.00_monomerB.out	-247.943		3.24122	3.44163	3.34142		3.36	3.357	3.43499		-0.118785	0.0816324	-0.0185762		-0.115785	0.0846324	-0.0155762		-0.193778	0.00663959	-0.093569
66_MeNH2-Pyridine_0.95_dimer.out	-343.686	66_MeNH2-Pyridine_0.95_cpA.out	-247.943	66_MeNH2-Pyridine_0.95_cpB.out	-95.7374	66_MeNH2-Pyridine_1.00_monomerA.out	-95.7373	66_MeNH2-Pyridine_1.00_monomerB.out	-247.943		3.72746	3.8998	3.81363		3.796	3.803	3.87		-0.0685424	0.103803	0.0176303		-0.0755424	0.096803	0.0106303		-0.142542	0.0298036	-0.0563691
66_MeNH2-Pyridine_1.00_dimer.out	-343.687	66_MeNH2-Pyridine_1.00_cpA.out	-247.943	66_MeNH2-Pyridine_1.00_cpB.out	-95.7374	66_MeNH2-Pyridine_1.00_monomerA.out	-95.7373	66_MeNH2-Pyridine_1.00_monomerB.out	-247.943		3.85971	4.00879	3.93425		3.893	3.907	3.96422		-0.0332854	0.115786	0.0412502		-0.0472854	0.101786	0.0272502		-0.104503	0.0445679	-0.0299676
66_MeNH2-Pyridine_1.05_dimer.out	-343.686	66_MeNH2-Pyridine_1.05_cpA.out	-247.943	66_MeNH2-Pyridine_1.05_cpB.out	-95.7374	66_MeNH2-Pyridine_1.00_monomerA.out	-95.7373	66_MeNH2-Pyridine_1.00_monomerB.out	-247.943		3.77408	3.90348	3.83878		3.784	3.803	3.85203		-0.00992049	0.119482	0.0547805		-0.0289205	0.100482	0.0357805		-0.0779545	0.0514475	-0.0132535
66_MeNH2-Pyridine_1.10_dimer.out	-343.686	66_MeNH2-Pyridine_1.10_cpA.out	-247.943	66_MeNH2-Pyridine_1.10_cpB.out	-95.7374	66_MeNH2-Pyridine_1.00_monomerA.out	-95.7373	66_MeNH2-Pyridine_1.00_monomerB.out	-247.943		3.56275	3.67486	3.61881		3.56	3.582	3.62322		0.00275105	0.114865	0.0588079		-0.019249	0.0928648	0.0368079		-0.0604737	0.0516401	-0.00441679
66_MeNH2-Pyridine_1.25_dimer.out	-343.685	66_MeNH2-Pyridine_1.25_cpA.out	-247.943	66_MeNH2-Pyridine_1.25_cpB.out	-95.7374	66_MeNH2-Pyridine_1.00_monomerA.out	-95.7373	66_MeNH2-Pyridine_1.00_monomerB.out	-247.943		2.68023	2.75556	2.71789		2.677	2.697	2.72364		0.00322947	0.07856	0.0408947		-0.0167705	0.05856	0.0208947		-0.0434138	0.0319168	-0.00574848
66_MeNH2-Pyridine_1.50_dimer.out	-343.683	66_MeNH2-Pyridine_1.50_cpA.out	-247.943	66_MeNH2-Pyridine_1.50_cpB.out	-95.7374	66_MeNH2-Pyridine_1.00_monomerA.out	-95.7373	66_MeNH2-Pyridine_1.00_monomerB.out	-247.943		1.46472	1.50564	1.48518		1.488	1.502	1.51634		-0.0232847	0.0176437	-0.0028205		-0.0372847	0.00364372	-0.0168205		-0.0516293	-0.0107009	-0.0311651
66_MeNH2-Pyridine_2.00_dimer.out	-343.681	66_MeNH2-Pyridine_2.00_cpA.out	-247.943	66_MeNH2-Pyridine_2.00_cpB.out	-95.7373	66_MeNH2-Pyridine_1.00_monomerA.out	-95.7373	66_MeNH2-Pyridine_1.00_monomerB.out	-247.943		0.475101	0.488518	0.48181		0.49	0.497	0.502315		-0.0148991	-0.0014815	-0.0081903		-0.0218991	-0.0084815	-0.0151903		-0.0272137	-0.0137961	-0.0205049

## Sheet: revDSD-PBEP86-D4 AVQZ
																		MSD	-0.204067	-0.00857877	-0.106323		-0.218895	-0.0234064	-0.121151		-0.272867	-0.077378	-0.175122
																		RMSD	0.307926	0.157487	0.21162		0.329698	0.170152	0.231946		0.392205	0.199481	0.285975
/work/comartin/S66x8/ORCA/revDSD-PBEP86-D4-haVQZ																			cp	raw	half		cp	raw	half		cp	raw	half
																		H bonds	0.204414	0.0935025	0.114301		0.191614	0.105657	0.108353		0.254498	0.0950952	0.157184
																		pi stack	0.37378	0.188762	0.245722		0.441056	0.203623	0.301172		0.530609	0.256267	0.382515
																		London	0.48851	0.234692	0.359609		0.51714	0.262431	0.388083		0.588906	0.33116	0.459016
																		mixed	0.199688	0.134814	0.136062		0.213057	0.131172	0.144178		0.258724	0.1296	0.177073
															REF S66x8				errors w.r.t. rev2022				errors w.r.t. Opus 279				errors w.r.t. Opus 268
															S66x8rev2022	BRONZE
											cp	raw	half		Golokesh,Semidalas,Mehta,Karton,Martin	Opus279	Opus268		cp	raw	half		cp	raw	half		cp	raw	half
01_Water-Water_0.90_dimer.out	-152.734	01_Water-Water_0.90_cpA.out	-76.3635	01_Water-Water_0.90_cpB.out	-76.3633	01_Water-Water_1.00_monomerA.out	-76.3632	01_Water-Water_1.00_monomerB.out	-76.3633		4.60277	4.75495	4.67886		4.666	4.61	4.65882		-0.0632282	0.0889466	0.0128592		-0.00722818	0.144947	0.0688592		-0.0560472	0.0961276	0.0200402			revDSD-PBEP86-D4/AVQZ
01_Water-Water_0.95_dimer.out	-152.735	01_Water-Water_0.95_cpA.out	-76.3634	01_Water-Water_0.95_cpB.out	-76.3633	01_Water-Water_1.00_monomerA.out	-76.3632	01_Water-Water_1.00_monomerB.out	-76.3633		4.91514	5.04474	4.97994		4.954	4.912	4.95377		-0.0388629	0.0907407	0.0259389		0.00313712	0.132741	0.0679389		-0.0386351	0.0909685	0.0261667		REF		raw	cp	half
01_Water-Water_1.00_dimer.out	-152.735	01_Water-Water_1.00_cpA.out	-76.3634	01_Water-Water_1.00_cpB.out	-76.3633	01_Water-Water_1.00_monomerA.out	-76.3632	01_Water-Water_1.00_monomerB.out	-76.3633		4.92534	5.03767	4.9815		4.946	4.915	4.95065		-0.0206612	0.0916661	0.0355024		0.0103388	0.122666	0.0665024		-0.0253132	0.0870141	0.0308505		Sterling Silver	RMSD	0.157487	0.307926	0.21162
01_Water-Water_1.05_dimer.out	-152.734	01_Water-Water_1.05_cpA.out	-76.3634	01_Water-Water_1.05_cpB.out	-76.3633	01_Water-Water_1.00_monomerA.out	-76.3632	01_Water-Water_1.00_monomerB.out	-76.3633		4.75312	4.85184	4.80248		4.762	4.739	4.76839		-0.00887939	0.0898447	0.0404826		0.0141206	0.112845	0.0634826		-0.0152657	0.0834584	0.0340964		Golokesh,Semidalas,Mehta,Karton,Martin	H bonds	0.0935025	0.204414	0.114301
01_Water-Water_1.10_dimer.out	-152.734	01_Water-Water_1.10_cpA.out	-76.3634	01_Water-Water_1.10_cpB.out	-76.3633	01_Water-Water_1.00_monomerA.out	-76.3632	01_Water-Water_1.00_monomerB.out	-76.3633		4.47832	4.56575	4.52204		4.48	4.462	4.48656		-0.00167712	0.0857522	0.0420376		0.0163229	0.103752	0.0600376		-0.00823996	0.0791894	0.0354747			pi stack	0.188762	0.37378	0.245722
01_Water-Water_1.25_dimer.out	-152.732	01_Water-Water_1.25_cpA.out	-76.3633	01_Water-Water_1.25_cpB.out	-76.3633	01_Water-Water_1.00_monomerA.out	-76.3632	01_Water-Water_1.00_monomerB.out	-76.3633		3.47278	3.53289	3.50283		3.47	3.46	3.47347		0.00277731	0.0628891	0.0328332		0.0127773	0.0728891	0.0428332		-0.000688338	0.0594234	0.0293675			London	0.234692	0.48851	0.359609
01_Water-Water_1.50_dimer.out	-152.73	01_Water-Water_1.50_cpA.out	-76.3633	01_Water-Water_1.50_cpB.out	-76.3632	01_Water-Water_1.00_monomerA.out	-76.3632	01_Water-Water_1.00_monomerB.out	-76.3633		2.10629	2.13587	2.12108		2.117	2.108	2.11314		-0.0107145	0.0188711	0.00407828		-0.00171453	0.0278711	0.0130783		-0.0068524	0.0227332	0.00794041			mixed	0.134814	0.199688	0.136062
01_Water-Water_2.00_dimer.out	-152.728	01_Water-Water_2.00_cpA.out	-76.3633	01_Water-Water_2.00_cpB.out	-76.3632	01_Water-Water_1.00_monomerA.out	-76.3632	01_Water-Water_1.00_monomerB.out	-76.3633		0.863348	0.871137	0.867243		0.874	0.871	0.871683		-0.0106518	-0.00286313	-0.00675746		-0.0076518	0.000136874	-0.00375746		-0.00833514	-0.000546461	-0.0044408		Opus279	RMSD	0.170152	0.329698	0.231946
02_Water-MeOH_0.90_dimer.out	-191.971	02_Water-MeOH_0.90_cpA.out	-115.599	02_Water-MeOH_0.90_cpB.out	-76.3633	02_Water-MeOH_1.00_monomerA.out	-76.3632	02_Water-MeOH_1.00_monomerB.out	-115.599		5.15041	5.34058	5.2455		5.298	5.232	5.29278		-0.147591	0.0425822	-0.0525044		-0.0815911	0.108582	0.0134956		-0.142376	0.0477977	-0.047289			H bonds	0.105657	0.191614	0.108353
02_Water-MeOH_0.95_dimer.out	-191.971	02_Water-MeOH_0.95_cpA.out	-115.599	02_Water-MeOH_0.95_cpB.out	-76.3633	02_Water-MeOH_1.00_monomerA.out	-76.3632	02_Water-MeOH_1.00_monomerB.out	-115.599		5.51604	5.67959	5.59781		5.629	5.578	5.63046		-0.112964	0.0505853	-0.0311895		-0.0619644	0.101585	0.0198105		-0.114426	0.0491235	-0.0326513			pi stack	0.203623	0.441056	0.301172
02_Water-MeOH_1.00_dimer.out	-191.971	02_Water-MeOH_1.00_cpA.out	-115.599	02_Water-MeOH_1.00_cpB.out	-76.3633	02_Water-MeOH_1.00_monomerA.out	-76.3632	02_Water-MeOH_1.00_monomerB.out	-115.599		5.54149	5.6839	5.6127		5.627	5.589	5.63423		-0.0855099	0.0569037	-0.0143031		-0.0475099	0.0949037	0.0236969		-0.0927368	0.0496768	-0.02153			London	0.262431	0.51714	0.388083
02_Water-MeOH_1.05_dimer.out	-191.971	02_Water-MeOH_1.05_cpA.out	-115.599	02_Water-MeOH_1.05_cpB.out	-76.3633	02_Water-MeOH_1.00_monomerA.out	-76.3632	02_Water-MeOH_1.00_monomerB.out	-115.599		5.35837	5.48369	5.42103		5.423	5.396	5.43386		-0.0646344	0.0606891	-0.00197266		-0.0376344	0.0876891	0.0250273		-0.0754981	0.0498254	-0.0128363			mixed	0.131172	0.213057	0.144178
02_Water-MeOH_1.10_dimer.out	-191.97	02_Water-MeOH_1.10_cpA.out	-115.599	02_Water-MeOH_1.10_cpB.out	-76.3633	02_Water-MeOH_1.00_monomerA.out	-76.3632	02_Water-MeOH_1.00_monomerB.out	-115.599		5.0559	5.16694	5.11142		5.106	5.086	5.11853		-0.0500959	0.0609426	0.00542338		-0.0300959	0.0809426	0.0254234		-0.0626276	0.0484109	-0.00710835		Opus268	RMSD	0.199481	0.392205	0.285975
02_Water-MeOH_1.25_dimer.out	-191.968	02_Water-MeOH_1.25_cpA.out	-115.599	02_Water-MeOH_1.25_cpB.out	-76.3633	02_Water-MeOH_1.00_monomerA.out	-76.3632	02_Water-MeOH_1.00_monomerB.out	-115.599		3.92382	4.00117	3.96249		3.956	3.947	3.96658		-0.0321811	0.045171	0.00649494		-0.0231811	0.054171	0.0154949		-0.0427604	0.0345917	-0.00408435			H bonds	0.0950952	0.254498	0.157184
02_Water-MeOH_1.50_dimer.out	-191.966	02_Water-MeOH_1.50_cpA.out	-115.599	02_Water-MeOH_1.50_cpB.out	-76.3632	02_Water-MeOH_1.00_monomerA.out	-76.3632	02_Water-MeOH_1.00_monomerB.out	-115.599		2.35481	2.39591	2.37536		2.391	2.385	2.39407		-0.0361938	0.00490924	-0.0156423		-0.0301938	0.0109092	-0.00964227		-0.0392641	0.00183895	-0.0187126			pi stack	0.256267	0.530609	0.382515
02_Water-MeOH_2.00_dimer.out	-191.964	02_Water-MeOH_2.00_cpA.out	-115.599	02_Water-MeOH_2.00_cpB.out	-76.3632	02_Water-MeOH_1.00_monomerA.out	-76.3632	02_Water-MeOH_1.00_monomerB.out	-115.599		0.922854	0.934649	0.928751		0.954	0.952	0.954668		-0.0311459	-0.0193514	-0.0252487		-0.0291459	-0.0173514	-0.0232487		-0.0318138	-0.0200193	-0.0259166			London	0.33116	0.588906	0.459016
03_Water-MeNH2_0.90_dimer.out	-172.112	03_Water-MeNH2_0.90_cpA.out	-95.7378	03_Water-MeNH2_0.90_cpB.out	-76.3632	03_Water-MeNH2_1.00_monomerA.out	-76.3631	03_Water-MeNH2_1.00_monomerB.out	-95.7377		6.60236	6.78402	6.69319		6.606	6.53	6.57684		-0.0036425	0.178019	0.087188		0.0723575	0.254019	0.163188		0.025522	0.207183	0.116352			mixed	0.1296	0.258724	0.177073
03_Water-MeNH2_0.95_dimer.out	-172.112	03_Water-MeNH2_0.95_cpA.out	-95.7378	03_Water-MeNH2_0.95_cpB.out	-76.3632	03_Water-MeNH2_1.00_monomerA.out	-76.3631	03_Water-MeNH2_1.00_monomerB.out	-95.7377		6.96718	7.12319	7.04519		6.957	6.897	6.93748		0.0101784	0.166193	0.0881856		0.0701784	0.226193	0.148186		0.0297012	0.185716	0.107708
03_Water-MeNH2_1.00_dimer.out	-172.112	03_Water-MeNH2_1.00_cpA.out	-95.7378	03_Water-MeNH2_1.00_cpB.out	-76.3632	03_Water-MeNH2_1.00_monomerA.out	-76.3631	03_Water-MeNH2_1.00_monomerB.out	-95.7377		6.95897	7.09408	7.02652		6.941	6.894	6.9286		0.0179671	0.15308	0.0855235		0.0649671	0.20008	0.132524		0.030368	0.165481	0.0979245
03_Water-MeNH2_1.05_dimer.out	-172.112	03_Water-MeNH2_1.05_cpA.out	-95.7378	03_Water-MeNH2_1.05_cpB.out	-76.3632	03_Water-MeNH2_1.00_monomerA.out	-76.3631	03_Water-MeNH2_1.00_monomerB.out	-95.7377		6.71825	6.8363	6.77728		6.695	6.66	6.68924		0.0232526	0.141301	0.0822766		0.0582526	0.176301	0.117277		0.0290141	0.147062	0.0880381
03_Water-MeNH2_1.10_dimer.out	-172.111	03_Water-MeNH2_1.10_cpA.out	-95.7378	03_Water-MeNH2_1.10_cpB.out	-76.3632	03_Water-MeNH2_1.00_monomerA.out	-76.3631	03_Water-MeNH2_1.00_monomerB.out	-95.7377		6.34147	6.44567	6.39357		6.318	6.291	6.31548		0.0234717	0.127669	0.0755703		0.0504717	0.154669	0.10257		0.0259891	0.130186	0.0780877
03_Water-MeNH2_1.25_dimer.out	-172.109	03_Water-MeNH2_1.25_cpA.out	-95.7377	03_Water-MeNH2_1.25_cpB.out	-76.3632	03_Water-MeNH2_1.00_monomerA.out	-76.3631	03_Water-MeNH2_1.00_monomerB.out	-95.7377		4.94243	5.01749	4.97996		4.928	4.916	4.93163		0.0144255	0.0894916	0.0519585		0.0264255	0.101492	0.0639585		0.0107983	0.0858643	0.0483313
03_Water-MeNH2_1.50_dimer.out	-172.106	03_Water-MeNH2_1.50_cpA.out	-95.7377	03_Water-MeNH2_1.50_cpB.out	-76.3632	03_Water-MeNH2_1.00_monomerA.out	-76.3631	03_Water-MeNH2_1.00_monomerB.out	-95.7377		2.96405	3.00604	2.98504		2.98	2.973	2.9817		-0.0159517	0.0260358	0.00504206		-0.00895168	0.0330358	0.0120421		-0.0176551	0.0243324	0.00333865
03_Water-MeNH2_2.00_dimer.out	-172.103	03_Water-MeNH2_2.00_cpA.out	-95.7377	03_Water-MeNH2_2.00_cpB.out	-76.3631	03_Water-MeNH2_1.00_monomerA.out	-76.3631	03_Water-MeNH2_1.00_monomerB.out	-95.7377		1.10495	1.11832	1.11164		1.142	1.14	1.14331		-0.0370524	-0.0236774	-0.0303649		-0.0350524	-0.0216774	-0.0283649		-0.0383602	-0.0249853	-0.0316728
04_Water-Peptide_0.90_dimer.out	-324.605	04_Water-Peptide_0.90_cpA.out	-248.229	04_Water-Peptide_0.90_cpB.out	-76.3633	04_Water-Peptide_1.00_monomerA.out	-76.3632	04_Water-Peptide_1.00_monomerB.out	-248.229		7.50034	7.74463	7.62249		7.739	7.666	7.74844		-0.238663	0.00563297	-0.116515		-0.165663	0.078633	-0.0435148		-0.248099	-0.00380394	-0.125952
04_Water-Peptide_0.95_dimer.out	-324.605	04_Water-Peptide_0.95_cpA.out	-248.229	04_Water-Peptide_0.95_cpB.out	-76.3633	04_Water-Peptide_1.00_monomerA.out	-76.3632	04_Water-Peptide_1.00_monomerB.out	-248.229		7.93945	8.1526	8.04602		8.131	8.076	8.14892		-0.191554	0.0216013	-0.0849766		-0.136554	0.0766013	-0.0299766		-0.20947	0.00368612	-0.102892
04_Water-Peptide_1.00_dimer.out	-324.605	04_Water-Peptide_1.00_cpA.out	-248.229	04_Water-Peptide_1.00_cpB.out	-76.3633	04_Water-Peptide_1.00_monomerA.out	-76.3632	04_Water-Peptide_1.00_monomerB.out	-248.229		7.97601	8.16419	8.0701		8.128	8.089	8.153		-0.151995	0.0361928	-0.0579009		-0.112995	0.0751928	-0.0189009		-0.176991	0.0111967	-0.0828971
04_Water-Peptide_1.05_dimer.out	-324.605	04_Water-Peptide_1.05_cpA.out	-248.229	04_Water-Peptide_1.05_cpB.out	-76.3633	04_Water-Peptide_1.00_monomerA.out	-76.3632	04_Water-Peptide_1.00_monomerB.out	-248.229		7.7582	7.92561	7.84191		7.878	7.851	7.90748		-0.119799	0.0476126	-0.0360931		-0.0927988	0.0746126	-0.00909313		-0.149276	0.0181357	-0.06557
04_Water-Peptide_1.10_dimer.out	-324.604	04_Water-Peptide_1.10_cpA.out	-248.229	04_Water-Peptide_1.10_cpB.out	-76.3633	04_Water-Peptide_1.00_monomerA.out	-76.3632	04_Water-Peptide_1.00_monomerB.out	-248.229		7.38789	7.53778	7.46284		7.482	7.465	7.51416		-0.0941095	0.0557823	-0.0191636		-0.0771095	0.0727823	-0.00216359		-0.126266	0.0236257	-0.0513202
04_Water-Peptide_1.25_dimer.out	-324.602	04_Water-Peptide_1.25_cpA.out	-248.229	04_Water-Peptide_1.25_cpB.out	-76.3632	04_Water-Peptide_1.00_monomerA.out	-76.3632	04_Water-Peptide_1.00_monomerB.out	-248.229		5.94107	6.04945	5.99526		5.994	5.991	6.02344		-0.0529257	0.0554498	0.00126206		-0.0499257	0.0584498	0.00426206		-0.0823696	0.026006	-0.0281818
[truncated: 498 more rows]

## Sheet: revDSD-PBEP86-D4 def2-QZVPPD
																		MSD	-0.245467	-0.0291102	-0.137289		-0.260296	-0.043939	-0.152117		-0.314427	-0.0980706	-0.206249
			/work/golokesh/projects/S66x8/revDSD-PBEP86-D4-def2-QZVPPD															RMSD	0.34805	0.160216	0.232321		0.369003	0.164405	0.24933		0.433945	0.20262	0.308627
[truncated: 536 more rows]

## Sheet: wB97M(2) haVQZ
																		MSD	-0.11942	-0.0265511	-0.0729857		-0.134248	-0.0413788	-0.0878134		-0.18822	-0.0953503	-0.141785
[truncated: 537 more rows]
