# Supplementary material for: S66x8 noncovalent interactions revisited: new benchmark and performance of composite localized coupled-cluster methods
Source: Royal Society of Chemistry journal article supplement (doi:10.1039/d2cp03938a), 2022-01-01
Supplement: d2cp03938a1.zip [file RPA and RPA+SOSEX for ESI.xlsx]

## Sheet: Summary
Counterpoise	full	full	full	full	full	full	full	full	full
	RPA@PBE0			RPA+SOSEX(W,νc)@PBE0			RPA+SOSEX(W(0),W(0))@PBE0
	TZ3P	QZ6P	CBS	TZ3P	QZ6P	CBS	TZ3P	QZ6P	CBS
RMSD all (kcal/mol)	1.24403	0.67532	0.436038	1.0027	0.401999	0.348578	1.13254	0.565264	0.397872
H-bonds	1.26074	0.797621	0.533892	0.666446	0.30698	0.349891	1.18437	0.740835	0.489453
π stacks	1.7608	0.730383	0.368919	1.65749	0.604662	0.406668	1.59474	0.557854	0.533251
London	1.08586	0.638258	0.456381	1.0755	0.471913	0.425879	0.934889	0.443896	0.281279
Mixed	0.981269	0.492913	0.311104	0.82345	0.311339	0.244151	0.883545	0.375526	0.231948

## Sheet: rpa with PBE0
		Hobza	TZ3P	QZ6P	CBS	sterling silver
		REF	1.2719	0.692298	0.423284	0.103549
RMSD	Full	0.103549	1.24403	0.67532	0.436038	REF
	H bonds	0.110601	1.26074	0.797621	0.533892
	pi stack	0.169447	1.7608	0.730383	0.368919
	London	0.0690192	1.08586	0.638258	0.456381
	mixed	0.0622365	0.981269	0.492913	0.311104
0	01WaterWater095	-4.88	-3.85	-4.16	-4.39	-4.95383
1	01WaterWater100	-4.89	-4.01	-4.48	-4.82	-4.94643
2	01WaterWater105	-4.72	-3.97	-4.22	-4.39	-4.76207
3	01WaterWater110	-4.45	-3.81	-4.02	-4.17	-4.47984
4	01WaterWater125	-3.46	-3.06	-3.19	-3.28	-3.4705
5	01WaterWater150	-2.11	-1.93	-1.98	-2.01	-2.11656
6	01WaterWater200	-0.87	-0.83	-0.83	-0.83	-0.874474
7	02WaterMeOH090	-5.19	-3.94	-4.6	-5.08	-5.29836
8	02WaterMeOH095	-5.55	-4.48	-4.94	-5.27	-5.62873
9	02WaterMeOH100	-5.57	-4.66	-4.86	-5	-5.62675
10	02WaterMeOH105	-5.38	-4.61	-4.87	-5.06	-5.42332
11	02WaterMeOH110	-5.08	-4.38	-4.57	-4.71	-5.10642
12	02WaterMeOH125	-3.94	-3.52	-3.63	-3.72	-3.95632
13	02WaterMeOH150	-2.39	-2.2	-2.24	-2.26	-2.39149
14	02WaterMeOH200	-0.95	-0.91	-0.91	-0.91	-0.954245
15	03WaterMeNH2090	-6.49	-5.16	-5.73	-6.15	-6.60638
16	03WaterMeNH2095	-6.87	-5.71	-5.98	-6.17	-6.95721
17	03WaterMeNH2100	-6.88	-5.87	-6.09	-6.26	-6.94056
18	03WaterMeNH2105	-6.65	-5.77	-5.96	-6.09	-6.69539
19	03WaterMeNH2110	-6.28	-5.52	-5.94	-6.24	-6.31753
20	03WaterMeNH2125	-4.92	-4.39	-4.61	-4.78	-4.92823
21	03WaterMeNH2150	-2.98	-2.72	-2.93	-3.09	-2.97972
22	03WaterMeNH2200	-1.14	-1.07	-1.07	-1.08	-1.14169
23	04WaterPeptide090	-7.63	-6.05	-6.75	-7.26	-7.73932
24	04WaterPeptide095	-8.06	-6.69	-7.64	-8.33	-8.13066
25	04WaterPeptide100	-8.08	-6.9	-7.14	-7.31	-8.12775
26	04WaterPeptide105	-7.84	-6.83	-7.02	-7.16	-7.87768
27	04WaterPeptide110	-7.46	-6.59	-6.73	-6.84	-7.48215
28	04WaterPeptide125	-5.99	-5.44	-5.64	-5.78	-5.99425
29	04WaterPeptide150	-3.83	-3.53	-3.58	-3.61	-3.83009
30	04WaterPeptide200	-1.44	-1.38	-1.9	-2.27	-1.43887
31	05MeOHMeOH090	-5.28	-3.84	-4.36	-4.74	-5.38667
32	05MeOHMeOH095	-5.69	-4.46	-5.04	-5.46	-5.77098
33	05MeOHMeOH100	-5.75	-4.69	-5.03	-5.28	-5.8036
34	05MeOHMeOH105	-5.58	-4.68	-4.96	-5.16	-5.62
35	05MeOHMeOH110	-5.28	-4.52	-4.76	-4.93	-5.31207
36	05MeOHMeOH125	-4.14	-3.66	-3.77	-3.85	-4.15067
37	05MeOHMeOH150	-2.52	-2.3	-2.34	-2.37	-2.5284
38	05MeOHMeOH200	-1.01	-0.96	-1	-1.02	-1.01101
39	06MeOHMeNH2090	-6.97	-5.23	-5.52	-5.73	-7.08127
40	06MeOHMeNH2095	-7.47	-5.97	-6.13	-6.25	-7.55441
41	06MeOHMeNH2100	-7.54	-6.24	-6.7	-7.03	-7.60087
42	06MeOHMeNH2105	-7.34	-6.21	-6.98	-7.55	-7.37783
43	06MeOHMeNH2110	-6.97	-5.99	-6.8	-7.4	-6.99427
44	06MeOHMeNH2125	-5.5	-4.86	-5.19	-5.44	-5.50482
45	06MeOHMeNH2150	-3.35	-3.02	-3.15	-3.25	-3.34489
46	06MeOHMeNH2200	-1.27	-1.18	-1.16	-1.15	-1.27327
47	07MeOHPeptide090	-7.63	-5.78	-6.4	-6.85	-7.75614
48	07MeOHPeptide095	-8.14	-6.53	-7.13	-7.58	-8.23517
49	07MeOHPeptide100	-8.22	-6.81	-7.34	-7.72	-8.28898
50	07MeOHPeptide105	-8.02	-6.79	-7.4	-7.84	-8.07188
51	07MeOHPeptide110	-7.66	-6.59	-7.03	-7.35	-7.69153
52	07MeOHPeptide125	-6.18	-5.44	-5.58	-5.68	-6.18753
53	07MeOHPeptide150	-3.65	-3.31	-3.4	-3.47	-3.64659
54	07MeOHPeptide200	-1.1	-1.05	-1.07	-1.08	-1.09751
55	08MeOHWater090	-4.59	-3.3	-3.77	-4.11	-4.67513
56	08MeOHWater095	-4.95	-3.85	-4.16	-4.38	-5.01703
57	08MeOHWater100	-5	-4.06	-4.31	-4.5	-5.04458
58	08MeOHWater105	-4.85	-4.05	-4.26	-4.42	-4.88113
59	08MeOHWater110	-4.59	-3.9	-4.09	-4.22	-4.60958
60	08MeOHWater125	-3.59	-3.15	-3.3	-3.41	-3.59767
61	08MeOHWater150	-2.2	-2	-2.05	-2.09	-2.20477
62	08MeOHWater200	-0.91	-0.86	-0.86	-0.85	-0.909327
63	09MeNH2MeOH090	-2.81	-1.78	-2.35	-2.77	-2.83742
64	09MeNH2MeOH095	-3.04	-2.19	-2.55	-2.8	-3.05113
65	09MeNH2MeOH100	-3.04	-2.33	-2.56	-2.72	-3.03663
66	09MeNH2MeOH105	-2.9	-2.32	-2.82	-3.18	-2.89242
67	09MeNH2MeOH110	-2.69	-2.21	-2.41	-2.55	-2.6818
68	09MeNH2MeOH125	-1.98	-1.7	-1.77	-1.81	-1.97082
69	09MeNH2MeOH150	-1.1	-0.98	-1	-1.01	-1.09813
70	09MeNH2MeOH200	-0.39	-0.36	-0.22	-0.11	-0.393125
71	10MeNH2MeNH2090	-3.7	-2.1	-2.74	-3.2	-3.72176
72	10MeNH2MeNH2095	-4.09	-2.75	-3.09	-3.33	-4.10425
73	10MeNH2MeNH2100	-4.15	-3.03	-3.16	-3.25	-4.1526
74	10MeNH2MeNH2105	-4.01	-3.07	-3.41	-3.65	-4.00192
75	10MeNH2MeNH2110	-3.75	-2.97	-3.24	-3.44	-3.74167
76	10MeNH2MeNH2125	-2.79	-2.33	-2.41	-2.46	-2.78069
77	10MeNH2MeNH2150	-1.31	-1.14	-1.17	-1.2	-1.30176
78	10MeNH2MeNH2200	-0.39	-0.35	-0.36	-0.36	-0.385362
79	11MeNH2Peptide090	-4.95	-2.98	-3.78	-4.36	-4.95826
80	11MeNH2Peptide095	-5.36	-3.68	-4.32	-4.79	-5.35424
81	11MeNH2Peptide100	-5.41	-3.98	-4.49	-4.87	-5.39666
82	11MeNH2Peptide105	-5.24	-4.02	-4.31	-4.51	-5.22226
83	11MeNH2Peptide110	-4.94	-3.91	-4.12	-4.28	-4.92339
84	11MeNH2Peptide125	-3.21	-2.71	-2.79	-2.85	-3.19683
85	11MeNH2Peptide150	-1.4	-1.24	-1.43	-1.57	-1.39662
86	11MeNH2Peptide200	-0.46	-0.43	-0.43	-0.44	-0.454835
87	12MeNH2Water090	-6.75	-5.24	-5.89	-6.36	-6.86088
88	12MeNH2Water095	-7.2	-5.9	-6.33	-6.64	-7.29079
89	12MeNH2Water100	-7.25	-6.12	-6.42	-6.64	-7.3118
90	12MeNH2Water105	-7.03	-6.05	-6.55	-6.92	-7.07662
91	12MeNH2Water110	-6.66	-5.81	-6.25	-6.57	-6.69088
92	12MeNH2Water125	-5.22	-4.63	-4.78	-4.88	-5.23057
93	12MeNH2Water150	-3.15	-2.87	-2.94	-3	-3.15494
94	12MeNH2Water200	-1.2	-1.12	-1.13	-1.13	-1.19627
95	13PeptideMeOH090	-5.67	-4.1	-4.87	-5.44	-5.75338
96	13PeptideMeOH095	-6.11	-4.77	-5.35	-5.78	-6.16512
97	13PeptideMeOH100	-6.18	-5.04	-5.51	-5.86	-6.22026
98	13PeptideMeOH105	-6.03	-5.05	-5.44	-5.73	-6.05408
99	13PeptideMeOH110	-5.74	-4.91	-5.21	-5.43	-5.75857
100	13PeptideMeOH125	-4.6	-4.08	-4.04	-4.01	-4.60846
101	13PeptideMeOH150	-2.95	-2.71	-2.76	-2.8	-2.94801
102	13PeptideMeOH200	-1.3	-1.25	-1.27	-1.29	-1.30709
103	14PeptideMeNH2090	-6.81	-5.08	-5.97	-6.62	-6.90681
104	14PeptideMeNH2095	-7.34	-5.85	-6.3	-6.63	-7.41129
105	14PeptideMeNH2100	-7.45	-6.16	-6.5	-6.75	-7.50022
106	14PeptideMeNH2105	-7.29	-6.17	-6.49	-6.72	-7.32364
107	14PeptideMeNH2110	-6.97	-5.99	-6.26	-6.46	-6.98556
108	14PeptideMeNH2125	-5.61	-4.97	-5.21	-5.38	-5.61042
109	14PeptideMeNH2150	-3.55	-3.22	-3.49	-3.69	-3.54879
110	14PeptideMeNH2200	-1.49	-1.4	-1.41	-1.42	-1.4882
111	15PeptidePeptide090	-8.02	-6.16	-6.92	-7.48	-8.09631
112	15PeptidePeptide095	-8.53	-6.92	-7.52	-7.95	-8.58646
113	15PeptidePeptide100	-8.62	-7.23	-7.8	-8.21	-8.65929
114	15PeptidePeptide105	-8.45	-7.24	-7.75	-8.11	-8.46406
115	15PeptidePeptide110	-8.1	-7.05	-7.07	-7.08	-8.10479
116	15PeptidePeptide125	-6.66	-5.98	-6.56	-6.99	-6.64877
117	15PeptidePeptide150	-4.42	-4.06	-4.46	-4.76	-4.40743
118	15PeptidePeptide200	-1.77	-1.7	-2.14	-2.45	-1.7751
119	16PeptideWater090	-4.7	-3.55	-3.81	-4	-4.76122
120	16PeptideWater095	-5.06	-4.09	-4.53	-4.86	-5.10831
121	16PeptideWater100	-5.12	-4.29	-4.9	-5.34	-5.14965
122	16PeptideWater105	-4.98	-4.29	-4.4	-4.49	-5.00493
123	16PeptideWater110	-4.74	-4.15	-4.15	-4.14	-4.75391
124	16PeptideWater125	-3.79	-3.43	-3.43	-3.42	-3.79918
125	16PeptideWater150	-2.45	-2.28	-2.32	-2.34	-2.45383
126	16PeptideWater200	-1.13	-1.1	-1.08	-1.07	-1.13683
127	17UracilUracilBP090	-15.7	-13.12	-14.37	-15.29	-16.0658
128	17UracilUracilBP095	-16.9	-14.67	-15.55	-16.19	-17.1875
129	17UracilUracilBP100	-17.18	-15.26	-15.74	-16.09	-17.4054
130	17UracilUracilBP105	-16.86	-15.2	-16.11	-16.78	-17.0338
131	17UracilUracilBP110	-16.17	-14.75	-15.14	-15.42	-16.293
132	17UracilUracilBP125	-13.15	-12.24	-12.61	-12.89	-13.1904
133	17UracilUracilBP150	-8.35	-7.92	-8.16	-8.33	-8.35706
134	17UracilUracilBP200	-3.33	-3.25	-3.24	-3.23	-3.33743
135	18WaterPyridine090	-6.39	-5.25	-5.78	-6.16	-6.4838
136	18WaterPyridine095	-6.8	-5.83	-6.63	-7.22	-6.87005
137	18WaterPyridine100	-6.83	-6.01	-6.36	-6.61	-6.87888
138	18WaterPyridine105	-6.62	-5.92	-6.01	-6.07	-6.65261
139	18WaterPyridine110	-6.27	-5.68	-5.73	-5.76	-6.28924
140	18WaterPyridine125	-4.93	-4.57	-4.56	-4.56	-4.92902
141	18WaterPyridine150	-3.01	-2.84	-2.83	-2.82	-3.00623
142	18WaterPyridine200	-1.19	-1.16	-1.14	-1.12	-1.18444
143	19MeOHPyridine090	-6.78	-5.32	-6.03	-6.54	-6.8755
144	19MeOHPyridine095	-7.31	-6.05	-6.86	-7.45	-7.37372
145	19MeOHPyridine100	-7.4	-6.31	-6.67	-6.93	-7.44822
146	19MeOHPyridine105	-7.23	-6.29	-6.58	-6.8	-7.25343
147	19MeOHPyridine110	-6.88	-6.07	-6.28	-6.44	-6.89666
148	19MeOHPyridine125	-5.48	-4.96	-5.3	-5.55	-5.47291
149	19MeOHPyridine150	-3.38	-3.14	-3.11	-3.08	-3.37293
150	19MeOHPyridine200	-1.33	-1.29	-0.57	-0.04	-1.32821
151	20AcOHAcOH090	-17.45	-14.43	-15.82	-16.83	-17.9251
152	20AcOHAcOH095	-18.79	-16.12	-17.41	-18.34	-19.1701
153	20AcOHAcOH100	-19.09	-16.74	-17.76	-18.5	-19.3967
154	20AcOHAcOH105	-18.72	-16.64	-17.47	-18.08	-18.9647
155	20AcOHAcOH110	-17.94	-16.1	-17.6	-18.7	-18.1251
156	20AcOHAcOH125	-14.56	-13.27	-14.03	-14.58	-14.6347
157	20AcOHAcOH150	-9.21	-8.5	-8.55	-8.59	-9.21926
158	20AcOHAcOH200	-3.59	-3.39	-3.42	-3.43	-3.59408
159	21AcNH2AcNH2090	-14.93	-12.45	-13.62	-14.48	-15.2739
160	21AcNH2AcNH2095	-16.03	-13.88	-15.18	-16.13	-16.2994
161	21AcNH2AcNH2100	-16.26	-14.41	-15.32	-15.98	-16.4717
162	21AcNH2AcNH2105	-15.94	-14.33	-14.91	-15.33	-16.094
163	21AcNH2AcNH2110	-15.26	-13.87	-14.36	-14.72	-15.3796
164	21AcNH2AcNH2125	-12.42	-11.5	-12.07	-12.48	-12.4598
165	21AcNH2AcNH2150	-8	-7.54	-7.74	-7.89	-8.00668
166	21AcNH2AcNH2200	-3	-2.91	-2.97	-3.01	-3.00804
167	22AcOHUracil090	-17.9	-15.06	-16.68	-17.86	-18.3243
168	22AcOHUracil095	-19.19	-16.7	-17.98	-18.92	-19.5241
169	22AcOHUracil100	-19.49	-17.32	-18.18	-18.81	-19.7586
170	22AcOHUracil105	-19.15	-17.25	-17.69	-18.01	-19.3605
171	22AcOHUracil110	-18.41	-16.74	-17.6	-18.22	-18.5649
172	22AcOHUracil125	-15.14	-14.01	-14.45	-14.78	-15.1977
173	22AcOHUracil150	-9.86	-9.27	-9.16	-9.08	-9.86735
174	22AcOHUracil200	-4.15	-4	-4.07	-4.13	-4.14991
175	23AcNH2Uracil090	-17.7	-15.08	-16.31	-17.21	-18.0758
176	23AcNH2Uracil095	-18.89	-16.62	-17.38	-17.94	-19.1946
177	23AcNH2Uracil100	-19.19	-17.21	-18.77	-19.91	-19.4317
178	23AcNH2Uracil105	-18.9	-17.18	-17.75	-18.18	-19.0856
179	23AcNH2Uracil110	-18.22	-16.73	-16.98	-17.17	-18.3674
180	23AcNH2Uracil125	-15.21	-14.21	-14.34	-14.44	-15.2646
181	23AcNH2Uracil150	-10.23	-9.71	-10.49	-11.05	-10.2404
182	23AcNH2Uracil200	-4.65	-4.52	-4.59	-4.64	-4.66191
183	24BenzeneBenzenepipi090	-0.23	3.2	1.01	-0.6	0.137809
184	24BenzeneBenzenepipi095	-2.07	0.48	-0.82	-1.77	-1.79077
185	24BenzeneBenzenepipi100	-2.74	-0.84	-1.72	-2.36	-2.52128
186	24BenzeneBenzenepipi105	-2.8	-1.39	-1.96	-2.38	-2.63293
187	24BenzeneBenzenepipi110	-2.58	-1.52	-1.71	-1.85	-2.44969
188	24BenzeneBenzenepipi125	-1.54	-1.1	-1.36	-1.56	-1.47949
189	24BenzeneBenzenepipi150	-0.49	-0.38	-0.42	-0.45	-0.468184
190	24BenzeneBenzenepipi200	-0.06	-0.04	-0.13	-0.19	-0.0586454
191	25PyridinePyridinepipi090	-1.32	2.21	0.65	-0.48	-0.964221
192	25PyridinePyridinepipi095	-3.17	-0.55	-2.04	-3.13	-2.89122
193	25PyridinePyridinepipi100	-3.83	-1.88	-3.09	-3.96	-3.61049
194	25PyridinePyridinepipi105	-3.86	-2.42	-2.93	-3.3	-3.68858
195	25PyridinePyridinepipi110	-3.58	-2.51	-2.64	-2.73	-3.45182
196	25PyridinePyridinepipi125	-2.36	-1.9	-2.08	-2.21	-2.29922
197	25PyridinePyridinepipi150	-0.96	-0.84	-0.92	-0.99	-0.945317
198	25PyridinePyridinepipi200	-0.24	-0.21	-0.1	-0.02	-0.233435
199	26UracilUracilpipi090	-7.86	-2.77	-5.35	-7.23	-7.5928
200	26UracilUracilpipi095	-9.5	-5.47	-8.34	-10.44	-9.26565
201	26UracilUracilpipi100	-9.82	-6.62	-8.8	-10.4	-9.61943
202	26UracilUracilpipi105	-9.43	-6.81	-8.03	-8.92	-9.25628
203	26UracilUracilpipi110	-8.69	-6.58	-7.5	-8.16	-8.54106
204	26UracilUracilpipi125	-6.07	-4.98	-6.17	-7.03	-5.99344
205	26UracilUracilpipi150	-3.1	-2.72	-2.84	-2.93	-3.07071
206	26UracilUracilpipi200	-0.99	-0.93	-1.02	-1.09	-0.986244
207	27BenzenePyridinepipi090	-0.73	2.83	1.01	-0.31	-0.362257
208	27BenzenePyridinepipi095	-2.69	-0.08	-1.26	-2.12	-2.41302
209	27BenzenePyridinepipi100	-3.37	-1.44	-2.55	-3.36	-3.15603
210	27BenzenePyridinepipi105	-3.4	-1.97	-2.54	-2.96	-3.23443
211	27BenzenePyridinepipi110	-3.13	-2.07	-2.76	-3.27	-3.00145
212	27BenzenePyridinepipi125	-1.97	-1.52	-1.65	-1.73	-1.91291
213	27BenzenePyridinepipi150	-0.72	-0.61	-0.72	-0.8	-0.705302
214	27BenzenePyridinepipi200	-0.15	-0.12	0.03	0.14	-0.143097
215	28BenzeneUracilpipi090	-3.53	0.96	-2.02	-4.19	-3.17801
216	28BenzeneUracilpipi095	-5.22	-1.73	-3.82	-5.34	-4.92446
217	28BenzeneUracilpipi100	-5.71	-3	-4.5	-5.6	-5.46473
218	28BenzeneUracilpipi105	-5.55	-3.45	-4.26	-4.85	-5.35136
219	28BenzeneUracilpipi110	-5.08	-3.45	-4.2	-4.75	-4.91567
220	28BenzeneUracilpipi125	-3.29	-2.49	-2.93	-3.25	-3.20726
221	28BenzeneUracilpipi150	-1.36	-1.11	-1.11	-1.11	-1.33389
222	28BenzeneUracilpipi200	-0.25	-0.2	-0.53	-0.77	-0.245855
223	29PyridineUracilpipi090	-3.74	1.01	-1.83	-3.9	-3.37441
224	29PyridineUracilpipi095	-6.17	-2.66	-4.93	-6.58	-5.87827
225	29PyridineUracilpipi100	-6.81	-4.22	-5.84	-7.02	-6.5763
226	29PyridineUracilpipi105	-6.58	-4.66	-5.76	-6.57	-6.39132
227	29PyridineUracilpipi110	-5.97	-4.54	-5.02	-5.37	-5.82038
228	29PyridineUracilpipi125	-3.87	-3.26	-3.84	-4.27	-3.79308
229	29PyridineUracilpipi150	-1.78	-1.64	-1.59	-1.56	-1.75215
230	29PyridineUracilpipi200	-0.53	-0.52	-0.5	-0.49	-0.528589
231	30BenzeneEthene090	-0.26	2.14	1.06	0.28	-0.021002
232	30BenzeneEthene095	-1.13	0.68	-0.1	-0.66	-0.939473
233	30BenzeneEthene100	-1.41	-0.06	-0.59	-0.97	-1.26853
234	30BenzeneEthene105	-1.4	-0.39	-0.74	-0.99	-1.29209
235	30BenzeneEthene110	-1.26	-0.5	-0.69	-0.82	-1.17227
236	30BenzeneEthene125	-0.69	-0.37	-0.51	-0.62	-0.650899
237	30BenzeneEthene150	-0.17	-0.09	0.08	0.2	-0.159214
238	30BenzeneEthene200	0.01	0.02	0	-0.01	0.0132824
239	31UracilEthene090	-2.57	-0.02	-1.64	-2.82	-2.39596
240	31UracilEthene095	-3.24	-1.25	-2.28	-3.04	-3.09153
241	31UracilEthene100	-3.38	-1.82	-2.6	-3.16	-3.25698
242	31UracilEthene105	-3.24	-2.02	-2.58	-2.99	-3.13698
243	31UracilEthene110	-2.96	-2.01	-2.41	-2.71	-2.87826
244	31UracilEthene125	-1.99	-1.52	-1.64	-1.72	-1.94883
245	31UracilEthene150	-0.93	-0.78	-0.93	-1.04	-0.917883
246	31UracilEthene200	-0.25	-0.23	-0.22	-0.21	-0.250618
247	32UracilEthyne090	-2.79	-0.15	-1.56	-2.59	-2.58661
248	32UracilEthyne095	-3.56	-1.49	-2.64	-3.48	-3.38713
249	32UracilEthyne100	-3.74	-2.11	-2.98	-3.62	-3.58724
250	32UracilEthyne105	-3.59	-2.31	-2.95	-3.42	-3.46393
251	32UracilEthyne110	-3.29	-2.28	-2.75	-3.09	-3.18288
252	32UracilEthyne125	-2.23	-1.72	-1.97	-2.15	-2.15864
253	32UracilEthyne150	-1.04	-0.87	-0.93	-0.97	-1.01222
254	32UracilEthyne200	-0.27	-0.25	-0.23	-0.22	-0.264394
255	33PyridineEthene090	-0.89	1.53	0.43	-0.37	-0.667746
256	33PyridineEthene095	-1.62	0.22	-0.55	-1.12	-1.447
257	33PyridineEthene100	-1.86	-0.46	-1.01	-1.42	-1.72072
258	33PyridineEthene105	-1.83	-0.76	-1.13	-1.39	-1.71932
259	33PyridineEthene110	-1.67	-0.86	-1.49	-1.94	-1.58095
260	33PyridineEthene125	-1.03	-0.66	-0.72	-0.75	-0.984842
261	33PyridineEthene150	-0.37	-0.26	-0.42	-0.54	-0.350189
262	33PyridineEthene200	-0.05	-0.03	0	0.03	-0.0416423
263	34PentanePentane090	-2.86	-0.56	-1.15	-1.58	-2.7964
264	34PentanePentane095	-3.62	-1.85	-2.55	-3.06	-3.56378
265	34PentanePentane100	-3.77	-2.42	-2.93	-3.31	-3.72259
266	34PentanePentane105	-3.61	-2.58	-2.95	-3.22	-3.56736
267	34PentanePentane110	-3.3	-2.53	-2.78	-2.97	-3.26495
268	34PentanePentane125	-2.24	-1.79	-1.46	-1.23	-2.21088
269	34PentanePentane150	-1.05	-0.92	-0.63	-0.42	-1.03869
270	34PentanePentane200	-0.27	-0.25	-0.23	-0.22	-0.262657
271	35NeopentanePentane090	-1.85	-0.44	-1.04	-1.47	-1.82214
272	35NeopentanePentane095	-2.49	-1.43	-1.71	-1.92	-2.46012
273	35NeopentanePentane100	-2.61	-1.82	-1.94	-2.03	-2.57959
274	35NeopentanePentane105	-2.48	-1.73	-1.97	-2.14	-2.45554
275	35NeopentanePentane110	-2.25	-1.67	-1.7	-1.72	-2.22804
276	35NeopentanePentane125	-1.5	-1.24	-1.16	-1.1	-1.47908
277	35NeopentanePentane150	-0.7	-0.65	-0.6	-0.57	-0.689927
278	35NeopentanePentane200	-0.18	-0.17	-0.16	-0.15	-0.184665
279	36NeopentaneNeopentane090	-1.45	-0.75	-1.41	-1.89	-1.42522
280	36NeopentaneNeopentane095	-1.74	-0.97	-1.8	-2.4	-1.70454
281	36NeopentaneNeopentane100	-1.77	-1.17	-0.26	0.41	-1.74209
282	36NeopentaneNeopentane105	-1.68	-1.21	-1.31	-1.37	-1.62466
283	36NeopentaneNeopentane110	-1.54	-1.17	-1.5	-1.74	-1.5021
284	36NeopentaneNeopentane125	-1.05	-0.91	-0.73	-0.59	-1.01832
285	36NeopentaneNeopentane150	-0.5	-0.52	-0.46	-0.41	-0.497189
286	36NeopentaneNeopentane200	-0.14	-0.14	-0.13	-0.12	-0.13246
287	37CyclopentaneNeopentane090	-1.61	-0.08	-0.4	-0.64	-1.57585
288	37CyclopentaneNeopentane095	-2.25	-1.03	-1.52	-1.88	-2.21712
289	37CyclopentaneNeopentane100	-2.41	-1.43	-2.04	-2.49	-2.37278
290	37CyclopentaneNeopentane105	-2.33	-1.54	-2.19	-2.66	-2.29461
291	37CyclopentaneNeopentane110	-2.14	-1.52	-1.63	-1.7	-2.11081
292	37CyclopentaneNeopentane125	-1.47	-1.19	-1.18	-1.17	-1.44924
293	37CyclopentaneNeopentane150	-0.71	-0.65	-0.6	-0.56	-0.698891
294	37CyclopentaneNeopentane200	-0.19	-0.18	-0.16	-0.14	-0.188656
295	38CyclopentaneCyclopentane090	-2.24	-0.36	-1.49	-2.31	-2.19808
296	38CyclopentaneCyclopentane095	-2.84	-1.35	-1.92	-2.34	-2.80041
297	38CyclopentaneCyclopentane100	-3	-1.83	-1.87	-1.89	-2.95617
298	38CyclopentaneCyclopentane105	-2.86	-1.95	-2.32	-2.59	-2.82352
299	38CyclopentaneCyclopentane110	-2.6	-1.89	-2.14	-2.33	-2.56285
300	38CyclopentaneCyclopentane125	-1.71	-1.38	-1.07	-0.85	-1.69325
301	38CyclopentaneCyclopentane150	-0.79	-0.71	-0.69	-0.68	-0.780367
302	38CyclopentaneCyclopentane200	-0.2	-0.2	-0.21	-0.21	-0.200665
303	39BenzeneCyclopentane090	-2.16	0.33	-0.84	-1.7	-1.9687
304	39BenzeneCyclopentane095	-3.24	-1.24	-2.13	-2.78	-3.08098
305	39BenzeneCyclopentane100	-3.57	-2.03	-2.74	-3.26	-3.43781
306	39BenzeneCyclopentane105	-3.47	-2.29	-2.59	-2.8	-3.36393
307	39BenzeneCyclopentane110	-3.17	-2.26	-2.44	-2.58	-3.08312
308	39BenzeneCyclopentane125	-2.07	-1.67	-1.87	-2.01	-2.02564
309	39BenzeneCyclopentane150	-0.9	-0.81	-0.81	-0.82	-0.88369
310	39BenzeneCyclopentane200	-0.19	-0.18	-0.1	-0.05	-0.188667
311	40BenzeneNeopentane090	-1.86	-0.1	-0.9	-1.48	-1.7119
312	40BenzeneNeopentane095	-2.68	-1.29	-1.86	-2.26	-2.54891
313	40BenzeneNeopentane100	-2.89	-1.84	-2.63	-3.21	-2.79053
314	40BenzeneNeopentane105	-2.8	-2.01	-2.33	-2.56	-2.72088
315	40BenzeneNeopentane110	-2.57	-1.97	-2.2	-2.37	-2.5023
316	40BenzeneNeopentane125	-1.7	-1.49	-1.47	-1.47	-1.67429
317	40BenzeneNeopentane150	-0.77	-0.71	-0.7	-0.69	-0.762121
318	40BenzeneNeopentane200	-0.19	-0.18	-0.22	-0.25	-0.186544
319	41UracilPentane090	-3.83	-0.71	-2.54	-3.87	-3.67913
320	41UracilPentane095	-4.69	-2.16	-3.09	-3.77	-4.56038
321	41UracilPentane100	-4.84	-2.82	-3.49	-3.97	-4.72406
322	41UracilPentane105	-4.6	-3.01	-3.81	-4.39	-4.50168
323	41UracilPentane110	-4.08	-2.88	-3.14	-3.33	-3.99925
324	41UracilPentane125	-2.44	-1.93	-2.01	-2.08	-2.40241
325	41UracilPentane150	-0.98	-0.83	-0.82	-0.81	-0.961312
326	41UracilPentane200	-0.21	-0.19	-0.15	-0.13	-0.212103
327	42UracilCyclopentane090	-3.05	-0.29	-1.8	-2.9	-2.89976
328	42UracilCyclopentane095	-3.97	-1.73	-2.89	-3.74	-3.83639
329	42UracilCyclopentane100	-4.13	-2.38	-3.17	-3.74	-4.01859
330	42UracilCyclopentane105	-3.92	-2.43	-3.13	-3.65	-3.82252
331	42UracilCyclopentane110	-3.54	-2.35	-2.77	-3.08	-3.45872
332	42UracilCyclopentane125	-2.29	-1.69	-1.85	-1.97	-2.2488
333	42UracilCyclopentane150	-1.02	-0.82	-1.18	-1.45	-1.00044
334	42UracilCyclopentane200	-0.25	-0.21	-0.2	-0.19	-0.24558
335	43UracilNeopentane090	-2.87	-0.77	-1.98	-2.87	-2.75624
336	43UracilNeopentane095	-3.6	-1.98	-2.74	-3.29	-3.49966
337	43UracilNeopentane100	-3.7	-2.39	-2.96	-3.38	-3.61265
338	43UracilNeopentane105	-3.49	-2.5	-2.72	-2.89	-3.4152
339	43UracilNeopentane110	-3.15	-2.39	-2.59	-2.74	-3.0833
340	43UracilNeopentane125	-2.05	-1.66	-1.34	-1.11	-2.01329
341	43UracilNeopentane150	-0.92	-0.81	-0.83	-0.85	-0.912106
342	43UracilNeopentane200	-0.23	-0.21	-0.19	-0.18	-0.228658
343	44EthenePentane090	-1.66	-0.24	-0.59	-0.86	-1.59748
344	44EthenePentane095	-1.97	-0.78	-1.14	-1.41	-1.91823
345	44EthenePentane100	-1.99	-1.05	-1.54	-1.9	-1.94265
346	44EthenePentane105	-1.86	-1.13	-1.54	-1.85	-1.82187
347	44EthenePentane110	-1.67	-1.1	-1.01	-0.94	-1.63925
348	44EthenePentane125	-1.09	-0.8	-0.91	-0.99	-1.06878
349	44EthenePentane150	-0.49	-0.4	-0.48	-0.54	-0.481353
350	44EthenePentane200	-0.12	-0.1	-0.1	-0.09	-0.117369
351	45EthynePentane090	-1.13	0.43	-0.41	-1.02	-0.991646
352	45EthynePentane095	-1.63	-0.36	-1.1	-1.64	-1.50954
353	45EthynePentane100	-1.75	-0.76	-1.37	-1.81	-1.64553
354	45EthynePentane105	-1.68	-0.9	-1.22	-1.45	-1.5887
355	45EthynePentane110	-1.52	-0.91	-1.15	-1.32	-1.44438
356	45EthynePentane125	-0.98	-0.68	-0.77	-0.84	-0.932426
357	45EthynePentane150	-0.42	-0.32	-0.34	-0.36	-0.400234
358	45EthynePentane200	-0.1	-0.08	-0.07	-0.06	-0.0916728
359	46PeptidePentane090	-3.75	-1.28	-2.29	-3.03	-3.65478
360	46PeptidePentane095	-4.21	-2.21	-2.96	-3.51	-4.115
361	46PeptidePentane100	-4.24	-2.63	-3.33	-3.85	-4.16179
362	46PeptidePentane105	-4.05	-2.68	-3.02	-3.27	-3.97387
363	46PeptidePentane110	-3.73	-2.62	-3.19	-3.6	-3.66489
364	46PeptidePentane125	-2.63	-1.98	-2.49	-2.86	-2.58551
365	46PeptidePentane150	-1.19	-0.98	-1.15	-1.27	-1.17157
366	46PeptidePentane200	-0.29	-0.25	-0.23	-0.21	-0.282057
367	47BenzeneBenzeneTS090	-1.64	0.34	-0.78	-1.59	-1.49324
368	47BenzeneBenzeneTS095	-2.58	-1.04	-1.85	-2.44	-2.45197
369	47BenzeneBenzeneTS100	-2.87	-1.67	-2.19	-2.56	-2.76169
370	47BenzeneBenzeneTS105	-2.82	-1.89	-2.25	-2.51	-2.73088
371	47BenzeneBenzeneTS110	-2.6	-1.89	-2.12	-2.29	-2.53572
372	47BenzeneBenzeneTS125	-1.77	-1.44	-1.48	-1.51	-1.73413
373	47BenzeneBenzeneTS150	-0.83	-0.76	-0.74	-0.72	-0.817747
374	47BenzeneBenzeneTS200	-0.22	-0.22	-0.38	-0.49	-0.222016
375	48PyridinePyridineTS090	-2.53	-0.54	-1.41	-2.05	-2.40152
376	48PyridinePyridineTS095	-3.31	-1.74	-2.7	-3.4	-3.19871
377	48PyridinePyridineTS100	-3.53	-2.29	-3.02	-3.55	-3.43979
378	48PyridinePyridineTS105	-3.45	-2.47	-2.86	-3.15	-3.37507
379	48PyridinePyridineTS110	-3.22	-2.44	-2.68	-2.86	-3.15369
380	48PyridinePyridineTS125	-2.29	-1.92	-2.1	-2.23	-2.25925
381	48PyridinePyridineTS150	-1.18	-1.08	-1.01	-0.96	-1.16835
382	48PyridinePyridineTS200	-0.37	-0.36	-0.26	-0.19	-0.370157
383	49BenzenePyridineTS090	-2.09	-0.1	-1.21	-2.02	-1.94501
384	49BenzenePyridineTS095	-3.04	-1.5	-2.12	-2.57	-2.92164
385	49BenzenePyridineTS100	-3.32	-2.12	-2.61	-2.96	-3.2258
386	49BenzenePyridineTS105	-3.26	-2.32	-3.05	-3.58	-3.17573
387	49BenzenePyridineTS110	-3.02	-2.29	-2.53	-2.71	-2.95491
388	49BenzenePyridineTS125	-2.1	-1.76	-1.72	-1.69	-2.06781
389	49BenzenePyridineTS150	-1.05	-0.97	-0.96	-0.96	-1.04165
390	49BenzenePyridineTS200	-0.33	-0.33	-0.47	-0.57	-0.331789
391	50BenzeneEthyneCHpi090	-1.87	-0.25	-1.12	-1.77	-1.79084
392	50BenzeneEthyneCHpi095	-2.65	-1.28	-2.04	-2.6	-2.58043
393	50BenzeneEthyneCHpi100	-2.86	-1.79	-2.37	-2.78	-2.80969
394	50BenzeneEthyneCHpi105	-2.79	-1.95	-2.38	-2.69	-2.74707
395	50BenzeneEthyneCHpi110	-2.58	-1.93	-2.24	-2.46	-2.54513
396	50BenzeneEthyneCHpi125	-1.79	-1.5	-1.59	-1.65	-1.7721
397	50BenzeneEthyneCHpi150	-0.89	-0.85	-0.84	-0.83	-0.88985
398	50BenzeneEthyneCHpi200	-0.27	-0.29	-0.43	-0.54	-0.27212
399	51EthyneEthyneTS090	-1.21	-0.52	-0.81	-1.02	-1.16975
400	51EthyneEthyneTS095	-1.47	-0.86	-1.15	-1.36	-1.43404
401	51EthyneEthyneTS100	-1.52	-1.02	-1.26	-1.43	-1.48941
402	51EthyneEthyneTS105	-1.46	-1.06	-1.24	-1.38	-1.43134
403	51EthyneEthyneTS110	-1.35	-1.02	-1.17	-1.27	-1.31762
404	51EthyneEthyneTS125	-0.93	-0.77	-0.83	-0.87	-0.913488
405	51EthyneEthyneTS150	-0.46	-0.43	-0.41	-0.4	-0.4518
406	51EthyneEthyneTS200	-0.14	-0.14	-0.12	-0.1	-0.133953
407	52BenzeneAcOHOHpi090	-3.97	-1.91	-2.94	-3.7	-3.90822
408	52BenzeneAcOHOHpi095	-4.58	-2.86	-4.5	-5.7	-4.52526
409	52BenzeneAcOHOHpi100	-4.7	-3.26	-4.7	-5.75	-4.65525
410	52BenzeneAcOHOHpi105	-4.55	-3.33	-4.01	-4.51	-4.50756
411	52BenzeneAcOHOHpi110	-4.25	-3.23	-3.79	-4.21	-4.21346
412	52BenzeneAcOHOHpi125	-3.13	-2.51	-3.01	-3.37	-3.10667
413	52BenzeneAcOHOHpi150	-1.7	-1.43	-1.79	-2.05	-1.69725
414	52BenzeneAcOHOHpi200	-0.55	-0.49	-0.59	-0.66	-0.553786
415	53BenzeneAcNH2NHpi090	-3.79	-2.03	-3.32	-4.26	-3.7675
416	53BenzeneAcNH2NHpi095	-4.27	-2.78	-3.74	-4.44	-4.24208
417	53BenzeneAcNH2NHpi100	-4.36	-3.11	-3.53	-3.84	-4.33419
418	53BenzeneAcNH2NHpi105	-4.23	-3.18	-3.38	-3.53	-4.20138
419	53BenzeneAcNH2NHpi110	-3.97	-3.09	-3.17	-3.24	-3.94465
420	53BenzeneAcNH2NHpi125	-2.97	-2.46	-2.73	-2.94	-2.95996
421	53BenzeneAcNH2NHpi150	-1.65	-1.43	-1.55	-1.64	-1.64141
422	53BenzeneAcNH2NHpi200	-0.48	-0.45	-0.25	-0.11	-0.480903
423	54BenzeneWaterOHpi090	-2.8	-1.42	-2.23	-2.83	-2.74512
424	54BenzeneWaterOHpi095	-3.21	-2.08	-2.63	-3.03	-3.16118
425	54BenzeneWaterOHpi100	-3.27	-2.33	-2.7	-2.97	-3.22366
426	54BenzeneWaterOHpi105	-3.13	-2.36	-2.65	-2.87	-3.09425
427	54BenzeneWaterOHpi110	-2.9	-2.26	-2.49	-2.66	-2.87037
428	54BenzeneWaterOHpi125	-2.1	-1.68	-1.85	-1.97	-2.08886
429	54BenzeneWaterOHpi150	-1.16	-0.98	-1.09	-1.17	-1.15401
430	54BenzeneWaterOHpi200	-0.42	-0.38	-0.82	-1.14	-0.417078
431	55BenzeneMeOHOHpi090	-3.45	-1.28	-2.57	-3.51	-3.338
432	55BenzeneMeOHOHpi095	-4.05	-2.25	-3.3	-4.07	-3.9499
433	55BenzeneMeOHOHpi100	-4.19	-2.7	-3.46	-4	-4.10581
434	55BenzeneMeOHOHpi105	-4.07	-2.84	-3.44	-3.88	-3.9982
435	55BenzeneMeOHOHpi110	-3.8	-2.78	-3.26	-3.62	-3.74932
436	55BenzeneMeOHOHpi125	-2.8	-2.21	-2.71	-3.07	-2.77441
437	55BenzeneMeOHOHpi150	-1.53	-1.27	-1.34	-1.38	-1.52391
438	55BenzeneMeOHOHpi200	-0.52	-0.46	-0.49	-0.51	-0.518123
439	56BenzeneMeNH2NHpi090	-2.51	-0.53	-1.72	-2.6	-2.38091
440	56BenzeneMeNH2NHpi095	-3.09	-1.49	-2.31	-2.91	-2.97661
441	56BenzeneMeNH2NHpi100	-3.23	-1.94	-2.49	-2.88	-3.13876
442	56BenzeneMeNH2NHpi105	-3.12	-2.1	-2.49	-2.79	-3.04387
443	56BenzeneMeNH2NHpi110	-2.86	-2.05	-2.34	-2.55	-2.80285
444	56BenzeneMeNH2NHpi125	-1.95	-1.55	-1.64	-1.7	-1.92243
445	56BenzeneMeNH2NHpi150	-0.94	-0.8	-0.82	-0.83	-0.93271
446	56BenzeneMeNH2NHpi200	-0.26	-0.23	-0.66	-0.97	-0.260262
447	57BenzenePeptideNHpi090	-3.75	-1.16	-2.47	-3.42	-3.59468
448	57BenzenePeptideNHpi095	-4.96	-2.92	-3.77	-4.39	-4.82807
449	57BenzenePeptideNHpi100	-5.28	-3.67	-4.77	-5.58	-5.17609
450	57BenzenePeptideNHpi105	-5.14	-3.79	-4.67	-5.32	-5.0589
451	57BenzenePeptideNHpi110	-4.78	-3.69	-4.41	-4.93	-4.71472
452	57BenzenePeptideNHpi125	-3.41	-2.84	-3.43	-3.86	-3.38389
453	57BenzenePeptideNHpi150	-1.8	-1.59	-1.69	-1.76	-1.79943
454	57BenzenePeptideNHpi200	-0.62	-0.58	-0.46	-0.37	-0.619431
455	58PyridinePyridineCHN090	-2.8	-1.56	-2.02	-2.35	-2.88416
456	58PyridinePyridineCHN095	-3.82	-2.86	-2.91	-2.95	-3.86933
457	58PyridinePyridineCHN100	-4.15	-3.48	-3.84	-4.1	-4.16646
458	58PyridinePyridineCHN105	-3.89	-3.42	-3.71	-3.93	-3.88977
459	58PyridinePyridineCHN110	-3.45	-3.12	-3.8	-4.3	-3.44199
460	58PyridinePyridineCHN125	-2.18	-2.06	-2.02	-1.98	-2.17336
461	58PyridinePyridineCHN150	-1.01	-1	-0.99	-0.99	-1.00513
462	58PyridinePyridineCHN200	-0.28	-0.28	-0.31	-0.33	-0.274043
463	59EthyneWaterCHO090	-2.52	-1.74	-2.18	-2.5	-2.60366
464	59EthyneWaterCHO095	-2.8	-2.17	-2.43	-2.63	-2.86494
465	59EthyneWaterCHO100	-2.85	-2.34	-2.53	-2.67	-2.89872
466	59EthyneWaterCHO105	-2.76	-2.35	-2.49	-2.59	-2.79927
467	59EthyneWaterCHO110	-2.6	-2.27	-2.37	-2.44	-2.62788
468	59EthyneWaterCHO125	-1.98	-1.79	-1.84	-1.88	-1.99931
469	59EthyneWaterCHO150	-1.17	-1.13	-1.1	-1.08	-1.17815
470	59EthyneWaterCHO200	-0.46	-0.47	-0.44	-0.41	-0.461297
471	60EthyneAcOHOHpi090	-4.28	-2.7	-3.3	-3.74	-4.30609
472	60EthyneAcOHOHpi095	-4.78	-3.41	-3.91	-4.28	-4.7866
473	60EthyneAcOHOHpi100	-4.86	-3.68	-4.38	-4.88	-4.85415
474	60EthyneAcOHOHpi105	-4.69	-3.68	-4.27	-4.69	-4.67874
475	60EthyneAcOHOHpi110	-4.39	-3.51	-4.01	-4.37	-4.37113
476	60EthyneAcOHOHpi125	-3.26	-2.69	-3	-3.23	-3.23436
477	60EthyneAcOHOHpi150	-1.77	-1.51	-1.6	-1.66	-1.76008
478	60EthyneAcOHOHpi200	-0.56	-0.5	-0.48	-0.46	-0.555852
479	61PentaneAcOH090	-2.7	-1.07	-1.63	-2.04	-2.62929
480	61PentaneAcOH095	-2.9	-1.57	-2.02	-2.34	-2.83503
481	61PentaneAcOH100	-2.88	-1.79	-2.05	-2.24	-2.8197
482	61PentaneAcOH105	-2.73	-1.78	-2.35	-2.77	-2.67689
483	61PentaneAcOH110	-2.52	-1.73	-1.93	-2.07	-2.46742
484	61PentaneAcOH125	-1.79	-1.32	-1.46	-1.56	-1.75749
485	61PentaneAcOH150	-0.78	-0.63	-0.62	-0.61	-0.772646
486	61PentaneAcOH200	-0.17	-0.14	-0.13	-0.13	-0.165994
487	62PentaneAcNH2090	-3.15	-1.05	-2.08	-2.83	-3.07359
488	62PentaneAcNH2095	-3.5	-1.79	-2.25	-2.58	-3.42638
489	62PentaneAcNH2100	-3.51	-2.06	-2.46	-2.76	-3.43722
490	62PentaneAcNH2105	-3.32	-2.14	-2.74	-3.18	-3.25919
491	62PentaneAcNH2110	-3.04	-2.08	-2.33	-2.52	-2.98775
492	62PentaneAcNH2125	-2.12	-1.59	-1.94	-2.19	-2.07844
493	62PentaneAcNH2150	-1.04	-0.85	-0.88	-0.91	-1.02451
494	62PentaneAcNH2200	-0.27	-0.24	-0.23	-0.23	-0.268049
495	63BenzeneAcOH090	-2.73	-0.38	-1.62	-2.52	-2.54659
496	63BenzeneAcOH095	-3.6	-1.64	-2.55	-3.21	-3.44386
497	63BenzeneAcOH100	-3.8	-2.27	-3.34	-4.13	-3.67136
498	63BenzeneAcOH105	-3.65	-2.45	-2.95	-3.32	-3.54622
499	63BenzeneAcOH110	-3.34	-2.4	-2.75	-3.01	-3.25335
500	63BenzeneAcOH125	-2.24	-1.73	-1.87	-1.98	-2.19512
501	63BenzeneAcOH150	-1.02	-0.85	-0.92	-0.97	-1.00733
502	63BenzeneAcOH200	-0.26	-0.23	-0.14	-0.08	-0.258702
503	64PeptideEthene090	-2.6	-0.83	-1.69	-2.31	-2.52687
504	64PeptideEthene095	-2.95	-1.49	-2.18	-2.68	-2.88149
505	64PeptideEthene100	-2.99	-1.79	-2.68	-3.34	-2.9279
506	64PeptideEthene105	-2.85	-1.87	-2.31	-2.64	-2.80104
507	64PeptideEthene110	-2.63	-1.82	-2.16	-2.41	-2.58541
508	64PeptideEthene125	-1.86	-1.4	-1.55	-1.66	-1.8281
509	64PeptideEthene150	-0.88	-0.72	-0.74	-0.76	-0.866895
510	64PeptideEthene200	-0.19	-0.17	-0.16	-0.16	-0.187642
511	65PyridineEthyne090	-3.54	-2.72	-3.18	-3.51	-3.66054
512	65PyridineEthyne095	-3.91	-3.24	-3.56	-3.79	-4.00764
513	65PyridineEthyne100	-3.99	-3.45	-3.67	-3.83	-4.06567
514	65PyridineEthyne105	-3.89	-3.45	-3.6	-3.72	-3.94577
515	65PyridineEthyne110	-3.68	-3.31	-3.43	-3.52	-3.72406
516	65PyridineEthyne125	-2.84	-2.66	-2.67	-2.68	-2.8661
517	65PyridineEthyne150	-1.67	-1.64	-1.7	-1.75	-1.67923
518	65PyridineEthyne200	-0.62	-0.63	-0.65	-0.67	-0.618433
519	66MeNH2Pyridine090	-3.45	-1.53	-2.45	-3.13	-3.35962
520	66MeNH2Pyridine095	-3.88	-2.3	-3.01	-3.53	-3.79562
521	66MeNH2Pyridine100	-3.97	-2.67	-3.26	-3.68	-3.89254
522	66MeNH2Pyridine105	-3.85	-2.79	-3.28	-3.63	-3.78432
523	66MeNH2Pyridine110	-3.62	-2.75	-3	-3.19	-3.56039
524	66MeNH2Pyridine125	-2.71	-2.23	-2.33	-2.4	-2.67699
525	66MeNH2Pyridine150	-1.5	-1.3	-1.63	-1.88	-1.4875
526	66MeNH2Pyridine200	-0.49	-0.45	-0.33	-0.24	-0.490416
527

## Sheet: sosex W,vc  with PBE0
		Hobza	TZ3P	QZ6P	CBS	sterling silver
		REF	1.0548	0.46486	0.370951	0.103549
RMSD	Full	0.103549	1.0027	0.401999	0.348578	REF
	H bonds	0.110601	0.666446	0.30698	0.349891
	pi stack	0.169447	1.65749	0.604662	0.406668
	London	0.0690192	1.0755	0.471913	0.425879
	mixed	0.0622365	0.82345	0.311339	0.244151
0	01WaterWater095	-4.88	-4.28	-4.57	-4.78	-4.95383
1	01WaterWater100	-4.89	-4.38	-4.74	-5.01	-4.94643
2	01WaterWater105	-4.72	-4.28	-4.5	-4.67	-4.76207
3	01WaterWater110	-4.45	-4.08	-4.27	-4.41	-4.47984
4	01WaterWater125	-3.46	-3.24	-3.35	-3.44	-3.4705
5	01WaterWater150	-2.11	-2.03	-2.07	-2.11	-2.11656
6	01WaterWater200	-0.87	-0.88	-0.87	-0.87	-0.874474
7	02WaterMeOH090	-5.19	-4.46	-4.98	-5.35	-5.29836
8	02WaterMeOH095	-5.55	-4.92	-5.29	-5.56	-5.62873
9	02WaterMeOH100	-5.57	-5.02	-5.23	-5.38	-5.62675
10	02WaterMeOH105	-5.38	-4.92	-5.15	-5.32	-5.42332
11	02WaterMeOH110	-5.08	-4.66	-4.84	-4.97	-5.10642
12	02WaterMeOH125	-3.94	-3.7	-3.8	-3.88	-3.95632
13	02WaterMeOH150	-2.39	-2.3	-2.33	-2.35	-2.39149
14	02WaterMeOH200	-0.95	-0.96	-0.95	-0.94	-0.954245
15	03WaterMeNH2090	-6.49	-5.69	-6.15	-6.48	-6.60638
16	03WaterMeNH2095	-6.87	-6.16	-6.41	-6.59	-6.95721
17	03WaterMeNH2100	-6.88	-6.25	-6.46	-6.61	-6.94056
18	03WaterMeNH2105	-6.65	-6.1	-6.27	-6.39	-6.69539
19	03WaterMeNH2110	-6.28	-5.81	-6.11	-6.33	-6.31753
20	03WaterMeNH2125	-4.92	-4.58	-4.75	-4.86	-4.92823
21	03WaterMeNH2150	-2.98	-2.83	-2.97	-3.08	-2.97972
22	03WaterMeNH2200	-1.14	-1.12	-1.12	-1.11	-1.14169
23	04WaterPeptide090	-7.63	-6.83	-7.34	-7.71	-7.73932
24	04WaterPeptide095	-8.06	-7.35	-8.09	-8.63	-8.13066
25	04WaterPeptide100	-8.08	-7.46	-7.73	-7.92	-8.12775
26	04WaterPeptide105	-7.84	-7.44	-7.54	-7.6	-7.87768
27	04WaterPeptide110	-7.46	-7.01	-7.19	-7.31	-7.48215
28	04WaterPeptide125	-5.99	-5.73	-5.9	-6.03	-5.99425
29	04WaterPeptide150	-3.83	-3.72	-3.77	-3.81	-3.83009
30	04WaterPeptide200	-1.44	-1.46	-1.77	-2	-1.43887
31	05MeOHMeOH090	-5.28	-4.43	-4.85	-5.15	-5.38667
32	05MeOHMeOH095	-5.69	-4.95	-5.44	-5.8	-5.77098
33	05MeOHMeOH100	-5.75	-5.11	-5.43	-5.67	-5.8036
34	05MeOHMeOH105	-5.58	-5.03	-5.3	-5.5	-5.62
35	05MeOHMeOH110	-5.28	-4.81	-5.04	-5.21	-5.31207
36	05MeOHMeOH125	-4.14	-3.85	-3.97	-4.05	-4.15067
37	05MeOHMeOH150	-2.52	-2.41	-2.45	-2.48	-2.5284
38	05MeOHMeOH200	-1.01	-1	-1.02	-1.03	-1.01101
39	06MeOHMeNH2090	-6.97	-5.87	-6.24	-6.51	-7.08127
40	06MeOHMeNH2095	-7.47	-6.51	-6.77	-6.97	-7.55441
41	06MeOHMeNH2100	-7.54	-6.69	-7.12	-7.43	-7.60087
42	06MeOHMeNH2105	-7.34	-6.59	-7.18	-7.61	-7.37783
43	06MeOHMeNH2110	-6.97	-6.32	-6.94	-7.4	-6.99427
44	06MeOHMeNH2125	-5.5	-5.08	-5.37	-5.59	-5.50482
45	06MeOHMeNH2150	-3.35	-3.14	-3.24	-3.31	-3.34489
46	06MeOHMeNH2200	-1.27	-1.23	-1.22	-1.21	-1.27327
47	07MeOHPeptide090	-7.63	-6.67	-7.26	-7.69	-7.75614
48	07MeOHPeptide095	-8.14	-7.28	-7.84	-8.25	-8.23517
49	07MeOHPeptide100	-8.22	-7.46	-7.94	-8.3	-8.28898
50	07MeOHPeptide105	-8.02	-7.35	-7.88	-8.27	-8.07188
51	07MeOHPeptide110	-7.66	-7.06	-7.46	-7.75	-7.69153
52	07MeOHPeptide125	-6.18	-5.77	-5.94	-6.07	-6.18753
53	07MeOHPeptide150	-3.65	-3.48	-3.57	-3.64	-3.64659
54	07MeOHPeptide200	-1.1	-1.1	-1.08	-1.06	-1.09751
55	08MeOHWater090	-4.59	-3.84	-4.27	-4.58	-4.67513
56	08MeOHWater095	-4.95	-4.31	-4.62	-4.84	-5.01703
57	08MeOHWater100	-5	-4.44	-4.7	-4.9	-5.04458
58	08MeOHWater105	-4.85	-4.36	-4.59	-4.76	-4.88113
59	08MeOHWater110	-4.59	-4.17	-4.38	-4.53	-4.60958
60	08MeOHWater125	-3.59	-3.33	-3.48	-3.59	-3.59767
61	08MeOHWater150	-2.2	-2.1	-2.16	-2.2	-2.20477
62	08MeOHWater200	-0.91	-0.91	-0.9	-0.9	-0.909327
63	09MeNH2MeOH090	-2.81	-2.07	-2.56	-2.91	-2.83742
64	09MeNH2MeOH095	-3.04	-2.42	-2.75	-2.99	-3.05113
65	09MeNH2MeOH100	-3.04	-2.52	-2.75	-2.92	-3.03663
66	09MeNH2MeOH105	-2.9	-2.47	-2.86	-3.14	-2.89242
67	09MeNH2MeOH110	-2.69	-2.34	-2.52	-2.65	-2.6818
68	09MeNH2MeOH125	-1.98	-1.78	-1.85	-1.9	-1.97082
69	09MeNH2MeOH150	-1.1	-1.02	-1.04	-1.06	-1.09813
70	09MeNH2MeOH200	-0.39	-0.38	-0.29	-0.22	-0.393125
71	10MeNH2MeNH2090	-3.7	-2.49	-3.08	-3.51	-3.72176
72	10MeNH2MeNH2095	-4.09	-3.08	-3.46	-3.73	-4.10425
73	10MeNH2MeNH2100	-4.15	-3.3	-3.52	-3.68	-4.1526
74	10MeNH2MeNH2105	-4.01	-3.29	-3.62	-3.86	-4.00192
75	10MeNH2MeNH2110	-3.75	-3.16	-3.42	-3.61	-3.74167
76	10MeNH2MeNH2125	-2.79	-2.45	-2.54	-2.61	-2.78069
77	10MeNH2MeNH2150	-1.31	-1.19	-1.22	-1.24	-1.30176
78	10MeNH2MeNH2200	-0.39	-0.37	-0.37	-0.37	-0.385362
79	11MeNH2Peptide090	-4.95	-3.57	-4.35	-4.91	-4.95826
80	11MeNH2Peptide095	-5.36	-4.19	-4.82	-5.28	-5.35424
81	11MeNH2Peptide100	-5.41	-4.42	-4.94	-5.32	-5.39666
82	11MeNH2Peptide105	-5.24	-4.4	-4.75	-5	-5.22226
83	11MeNH2Peptide110	-4.94	-4.24	-4.51	-4.71	-4.92339
84	11MeNH2Peptide125	-3.21	-2.89	-3	-3.09	-3.19683
85	11MeNH2Peptide150	-1.4	-1.36	-1.45	-1.52	-1.39662
86	11MeNH2Peptide200	-0.46	-0.45	-0.46	-0.46	-0.454835
87	12MeNH2Water090	-6.75	-5.8	-6.32	-6.7	-6.86088
88	12MeNH2Water095	-7.2	-6.37	-6.74	-7.01	-7.29079
89	12MeNH2Water100	-7.25	-6.51	-6.79	-7	-7.3118
90	12MeNH2Water105	-7.03	-6.39	-6.79	-7.08	-7.07662
91	12MeNH2Water110	-6.66	-6.1	-6.45	-6.7	-6.69088
92	12MeNH2Water125	-5.22	-4.84	-4.97	-5.06	-5.23057
93	12MeNH2Water150	-3.15	-2.98	-3.03	-3.07	-3.15494
94	12MeNH2Water200	-1.2	-1.17	-1.17	-1.17	-1.19627
95	13PeptideMeOH090	-5.67	-4.66	-5.38	-5.9	-5.75338
96	13PeptideMeOH095	-6.11	-5.24	-5.8	-6.2	-6.16512
97	13PeptideMeOH100	-6.18	-5.46	-5.89	-6.21	-6.22026
98	13PeptideMeOH105	-6.03	-5.4	-5.77	-6.05	-6.05408
99	13PeptideMeOH110	-5.74	-5.21	-5.51	-5.73	-5.75857
100	13PeptideMeOH125	-4.6	-4.29	-4.34	-4.39	-4.60846
101	13PeptideMeOH150	-2.95	-2.83	-2.88	-2.92	-2.94801
102	13PeptideMeOH200	-1.3	-1.31	-1.32	-1.32	-1.30709
103	14PeptideMeNH2090	-6.81	-5.59	-6.39	-6.97	-6.90681
104	14PeptideMeNH2095	-7.34	-6.28	-6.76	-7.11	-7.41129
105	14PeptideMeNH2100	-7.45	-6.53	-6.92	-7.21	-7.50022
106	14PeptideMeNH2105	-7.29	-7.02	-6.83	-6.7	-7.32364
107	14PeptideMeNH2110	-6.97	-6.27	-6.43	-6.54	-6.98556
108	14PeptideMeNH2125	-5.61	-5.17	-5.37	-5.52	-5.61042
109	14PeptideMeNH2150	-3.55	-3.34	-3.57	-3.74	-3.54879
110	14PeptideMeNH2200	-1.49	-1.45	-1.46	-1.46	-1.4882
111	15PeptidePeptide090	-8.02	-6.86	-7.62	-8.18	-8.09631
112	15PeptidePeptide095	-8.53	-7.53	-8.13	-8.58	-8.58646
113	15PeptidePeptide100	-8.62	-7.76	-8.32	-8.72	-8.65929
114	15PeptidePeptide105	-8.45	-7.69	-8.18	-8.54	-8.46406
115	15PeptidePeptide110	-8.1	-7.44	-7.59	-7.71	-8.10479
116	15PeptidePeptide125	-6.66	-6.24	-6.72	-7.07	-6.64877
117	15PeptidePeptide150	-4.42	-4.22	-4.52	-4.74	-4.40743
118	15PeptidePeptide200	-1.77	-1.71	-2.05	-2.29	-1.7751
119	16PeptideWater090	-4.7	-4.02	-4.32	-4.54	-4.76122
120	16PeptideWater095	-5.06	-4.47	-4.89	-5.2	-5.10831
121	16PeptideWater100	-5.12	-4.62	-5.13	-5.5	-5.14965
122	16PeptideWater105	-4.98	-4.57	-4.73	-4.85	-5.00493
123	16PeptideWater110	-4.74	-4.39	-4.47	-4.53	-4.75391
124	16PeptideWater125	-3.79	-3.6	-3.65	-3.68	-3.79918
125	16PeptideWater150	-2.45	-2.37	-2.44	-2.49	-2.45383
126	16PeptideWater200	-1.13	-1.15	-1.14	-1.13	-1.13683
127	17UracilUracilBP090	-15.7	-15.1	-16.43	-17.41	-16.0658
128	17UracilUracilBP095	-16.9	-16.33	-17.26	-17.94	-17.1875
129	17UracilUracilBP100	-17.18	-16.73	-17.3	-17.72	-17.4054
130	17UracilUracilBP105	-16.86	-16.44	-17.3	-17.93	-17.0338
131	17UracilUracilBP110	-16.17	-15.84	-16.34	-16.71	-16.293
132	17UracilUracilBP125	-13.15	-12.95	-13.35	-13.65	-13.1904
133	17UracilUracilBP150	-8.35	-8.32	-8.56	-8.73	-8.35706
134	17UracilUracilBP200	-3.33	-3.42	-3.45	-3.46	-3.33743
135	18WaterPyridine090	-6.39	-5.66	-6.11	-6.44	-6.4838
136	18WaterPyridine095	-6.8	-6.17	-6.76	-7.2	-6.87005
137	18WaterPyridine100	-6.83	-6.3	-6.57	-6.77	-6.87888
138	18WaterPyridine105	-6.62	-6.15	-6.26	-6.33	-6.65261
139	18WaterPyridine110	-6.27	-5.87	-5.95	-6	-6.28924
140	18WaterPyridine125	-4.93	-4.7	-4.7	-4.7	-4.92902
141	18WaterPyridine150	-3.01	-2.91	-2.9	-2.89	-3.00623
142	18WaterPyridine200	-1.19	-1.19	-1.16	-1.14	-1.18444
143	19MeOHPyridine090	-6.78	-5.83	-6.47	-6.94	-6.8755
144	19MeOHPyridine095	-7.31	-6.47	-7.16	-7.66	-7.37372
145	19MeOHPyridine100	-7.4	-6.67	-7.02	-7.28	-7.44822
146	19MeOHPyridine105	-7.23	-6.58	-6.87	-7.09	-7.25343
147	19MeOHPyridine110	-6.88	-6.32	-6.54	-6.7	-6.89666
148	19MeOHPyridine125	-5.48	-5.11	-5.36	-5.54	-5.47291
149	19MeOHPyridine150	-3.38	-3.23	-3.21	-3.21	-3.37293
150	19MeOHPyridine200	-1.33	-1.32	-0.86	-0.52	-1.32821
151	20AcOHAcOH090	-17.45	-16.51	-17.77	-18.69	-17.9251
152	20AcOHAcOH095	-18.79	-17.89	-19.05	-19.9	-19.1701
153	20AcOHAcOH100	-19.09	-18.31	-19.21	-19.87	-19.3967
154	20AcOHAcOH105	-18.72	-17.94	-18.75	-19.35	-18.9647
155	20AcOHAcOH110	-17.94	-17.22	-18.4	-19.26	-18.1251
156	20AcOHAcOH125	-14.56	-14	-14.67	-15.16	-14.6347
157	20AcOHAcOH150	-9.21	-8.92	-9.06	-9.17	-9.21926
158	20AcOHAcOH200	-3.59	-3.59	-3.6	-3.61	-3.59408
159	21AcNH2AcNH2090	-14.93	-13.81	-14.9	-15.7	-15.2739
160	21AcNH2AcNH2095	-16.03	-15.03	-16.14	-16.95	-16.2994
161	21AcNH2AcNH2100	-16.26	-15.38	-16.24	-16.87	-16.4717
162	21AcNH2AcNH2105	-15.94	-15.16	-15.78	-16.23	-16.094
163	21AcNH2AcNH2110	-15.26	-14.58	-15.11	-15.49	-15.3796
164	21AcNH2AcNH2125	-12.42	-11.97	-12.47	-12.84	-12.4598
165	21AcNH2AcNH2150	-8	-7.8	-8.01	-8.16	-8.00668
166	21AcNH2AcNH2200	-3	-3.01	-3.06	-3.09	-3.00804
167	22AcOHUracil090	-17.9	-17.17	-18.61	-19.65	-18.3243
168	22AcOHUracil095	-19.19	-18.52	-19.72	-20.58	-19.5241
169	22AcOHUracil100	-19.49	-18.88	-19.75	-20.39	-19.7586
170	22AcOHUracil105	-19.15	-18.61	-19.18	-19.59	-19.3605
171	22AcOHUracil110	-18.41	-17.93	-18.73	-19.31	-18.5649
172	22AcOHUracil125	-15.14	-14.83	-15.3	-15.64	-15.1977
173	22AcOHUracil150	-9.86	-9.75	-9.78	-9.81	-9.86735
174	22AcOHUracil200	-4.15	-4.23	-4.3	-4.34	-4.14991
175	23AcNH2Uracil090	-17.7	-16.99	-18.11	-18.93	-18.0758
176	23AcNH2Uracil095	-18.89	-18.26	-19.05	-19.62	-19.1946
177	23AcNH2Uracil100	-19.19	-18.64	-19.93	-20.86	-19.4317
178	23AcNH2Uracil105	-18.9	-18.42	-19.06	-19.53	-19.0856
179	23AcNH2Uracil110	-18.22	-17.83	-18.19	-18.45	-18.3674
180	23AcNH2Uracil125	-15.21	-14.97	-15.2	-15.37	-15.2646
181	23AcNH2Uracil150	-10.23	-10.2	-10.71	-11.09	-10.2404
182	23AcNH2Uracil200	-4.65	-4.76	-4.82	-4.86	-4.66191
183	24BenzeneBenzenepipi090	-0.23	3.39	1.27	-0.28	0.137809
184	24BenzeneBenzenepipi095	-2.07	0.62	-0.74	-1.74	-1.79077
185	24BenzeneBenzenepipi100	-2.74	-0.75	-1.68	-2.36	-2.52128
186	24BenzeneBenzenepipi105	-2.8	-1.3	-1.96	-2.43	-2.63293
187	24BenzeneBenzenepipi110	-2.58	-1.45	-1.77	-2.01	-2.44969
188	24BenzeneBenzenepipi125	-1.54	-1.04	-1.32	-1.53	-1.47949
189	24BenzeneBenzenepipi150	-0.49	-0.35	-0.41	-0.45	-0.468184
190	24BenzeneBenzenepipi200	-0.06	-0.03	-0.1	-0.15	-0.0586454
191	25PyridinePyridinepipi090	-1.32	2.4	0.61	-0.69	-0.964221
192	25PyridinePyridinepipi095	-3.17	-0.46	-1.98	-3.09	-2.89122
193	25PyridinePyridinepipi100	-3.83	-1.81	-3.01	-3.88	-3.61049
194	25PyridinePyridinepipi105	-3.86	-2.36	-3	-3.46	-3.68858
195	25PyridinePyridinepipi110	-3.58	-2.46	-2.76	-2.98	-3.45182
196	25PyridinePyridinepipi125	-2.36	-1.88	-2.09	-2.24	-2.29922
197	25PyridinePyridinepipi150	-0.96	-0.82	-0.91	-0.98	-0.945317
198	25PyridinePyridinepipi200	-0.24	-0.22	-0.15	-0.1	-0.233435
199	26UracilUracilpipi090	-7.86	-3.6	-6.48	-8.59	-7.5928
200	26UracilUracilpipi095	-9.5	-6.1	-8.76	-10.7	-9.26565
201	26UracilUracilpipi100	-9.82	-7.22	-9.29	-10.8	-9.61943
202	26UracilUracilpipi105	-9.43	-7.33	-8.65	-9.61	-9.25628
203	26UracilUracilpipi110	-8.69	-7.08	-8.07	-8.79	-8.54106
204	26UracilUracilpipi125	-6.07	-5.27	-6.29	-7.03	-5.99344
205	26UracilUracilpipi150	-3.1	-2.87	-3	-3.09	-3.07071
206	26UracilUracilpipi200	-0.99	-0.99	-1.12	-1.21	-0.986244
207	27BenzenePyridinepipi090	-0.73	2.99	1.09	-0.29	-0.362257
208	27BenzenePyridinepipi095	-2.69	0.58	-1.27	-2.61	-2.41302
209	27BenzenePyridinepipi100	-3.37	-1.36	-2.49	-3.31	-3.15603
210	27BenzenePyridinepipi105	-3.4	-1.89	-2.57	-3.07	-3.23443
211	27BenzenePyridinepipi110	-3.13	-2.02	-2.71	-3.21	-3.00145
212	27BenzenePyridinepipi125	-1.97	-1.49	-1.65	-1.77	-1.91291
213	27BenzenePyridinepipi150	-0.72	-0.59	-0.7	-0.78	-0.705302
214	27BenzenePyridinepipi200	-0.15	-0.12	-0.03	0.03	-0.143097
215	28BenzeneUracilpipi090	-3.53	0.77	-2.09	-4.17	-3.17801
216	28BenzeneUracilpipi095	-5.22	-1.87	-3.96	-5.49	-4.92446
217	28BenzeneUracilpipi100	-5.71	-3.12	-4.7	-5.85	-5.46473
218	28BenzeneUracilpipi105	-5.55	-3.56	-4.52	-5.23	-5.35136
219	28BenzeneUracilpipi110	-5.08	-3.53	-4.36	-4.97	-4.91567
220	28BenzeneUracilpipi125	-3.29	-2.55	-3	-3.33	-3.20726
221	28BenzeneUracilpipi150	-1.36	-1.15	-1.19	-1.21	-1.33389
222	28BenzeneUracilpipi200	-0.25	-0.13	-0.46	-0.7	-0.245855
223	29PyridineUracilpipi090	-3.74	0.75	-2.09	-4.16	-3.37441
224	29PyridineUracilpipi095	-6.17	-2.9	-5.37	-7.17	-5.87827
225	29PyridineUracilpipi100	-6.81	-4.41	-6	-7.16	-6.5763
226	29PyridineUracilpipi105	-6.58	-4.8	-5.96	-6.8	-6.39132
227	29PyridineUracilpipi110	-5.97	-4.67	-5.28	-5.73	-5.82038
228	29PyridineUracilpipi125	-3.87	-3.34	-3.84	-4.21	-3.79308
229	29PyridineUracilpipi150	-1.78	-1.7	-1.45	-1.27	-1.75215
230	29PyridineUracilpipi200	-0.53	-0.53	-0.52	-0.5	-0.528589
231	30BenzeneEthene090	-0.26	2.11	1.02	0.22	-0.021002
232	30BenzeneEthene095	-1.13	0.67	-0.14	-0.73	-0.939473
233	30BenzeneEthene100	-1.41	-0.05	-0.61	-1.03	-1.26853
234	30BenzeneEthene105	-1.4	-0.36	-0.77	-1.06	-1.29209
235	30BenzeneEthene110	-1.26	-0.47	-0.71	-0.89	-1.17227
236	30BenzeneEthene125	-0.69	-0.33	-0.46	-0.56	-0.650899
237	30BenzeneEthene150	-0.17	-0.06	0.03	0.1	-0.159214
238	30BenzeneEthene200	0.01	0.03	0.02	0.01	0.0132824
239	31UracilEthene090	-2.57	-0.34	-1.85	-2.95	-2.39596
240	31UracilEthene095	-3.24	-1.52	-2.52	-3.26	-3.09153
241	31UracilEthene100	-3.38	-2.03	-2.81	-3.37	-3.25698
242	31UracilEthene105	-3.24	-2.2	-2.78	-3.21	-3.13698
243	31UracilEthene110	-2.96	-2.16	-2.59	-2.9	-2.87826
244	31UracilEthene125	-1.99	-1.62	-1.77	-1.88	-1.94883
245	31UracilEthene150	-0.93	-0.79	-0.95	-1.06	-0.917883
246	31UracilEthene200	-0.25	-0.25	-0.25	-0.25	-0.250618
247	32UracilEthyne090	-2.79	-0.52	-1.9	-2.9	-2.58661
248	32UracilEthyne095	-3.56	-1.9	-2.92	-3.66	-3.38713
249	32UracilEthyne100	-3.74	-2.36	-3.19	-3.79	-3.58724
250	32UracilEthyne105	-3.59	-2.52	-3.17	-3.65	-3.46393
251	32UracilEthyne110	-3.29	-2.47	-2.97	-3.33	-3.18288
252	32UracilEthyne125	-2.23	-1.83	-2.08	-2.26	-2.15864
253	32UracilEthyne150	-1.04	-0.6	-0.99	-1.26	-1.01222
254	32UracilEthyne200	-0.27	-0.27	-0.26	-0.26	-0.264394
255	33PyridineEthene090	-0.89	1.2	0.31	-0.34	-0.667746
256	33PyridineEthene095	-1.62	0.16	-0.65	-1.24	-1.447
257	33PyridineEthene100	-1.86	-0.49	-1.08	-1.52	-1.72072
258	33PyridineEthene105	-1.83	-0.73	-1.19	-1.51	-1.71932
259	33PyridineEthene110	-1.67	-0.86	-1.41	-1.82	-1.58095
260	33PyridineEthene125	-1.03	-0.65	-0.73	-0.79	-0.984842
261	33PyridineEthene150	-0.37	-0.24	-0.36	-0.45	-0.350189
262	33PyridineEthene200	-0.05	-0.02	-0.01	0	-0.0416423
263	34PentanePentane090	-2.86	-0.76	-1.56	-2.14	-2.7964
264	34PentanePentane095	-3.62	-1.99	-2.79	-3.37	-3.56378
265	34PentanePentane100	-3.77	-2.51	-3.12	-3.57	-3.72259
266	34PentanePentane105	-3.61	-2.63	-3.1	-3.44	-3.56736
267	34PentanePentane110	-3.3	-2.55	-2.91	-3.16	-3.26495
268	34PentanePentane125	-2.24	-1.82	-1.67	-1.57	-2.21088
269	34PentanePentane150	-1.05	-0.98	-0.75	-0.58	-1.03869
270	34PentanePentane200	-0.27	-0.25	-0.24	-0.23	-0.262657
271	35NeopentanePentane090	-1.85	-0.56	-1.23	-1.71	-1.82214
272	35NeopentanePentane095	-2.49	-1.5	-1.88	-2.17	-2.46012
273	35NeopentanePentane100	-2.61	-1.84	-2.09	-2.27	-2.57959
274	35NeopentanePentane105	-2.48	-1.8	-2.09	-2.3	-2.45554
275	35NeopentanePentane110	-2.25	-1.72	-1.84	-1.93	-2.22804
276	35NeopentanePentane125	-1.5	-1.29	-1.26	-1.23	-1.47908
277	35NeopentanePentane150	-0.7	-0.64	-0.62	-0.61	-0.689927
278	35NeopentanePentane200	-0.18	-0.17	-0.16	-0.16	-0.184665
279	36NeopentaneNeopentane090	-1.45	-0.72	-1.28	-1.69	-1.42522
280	36NeopentaneNeopentane095	-1.74	-1.02	-1.65	-2.11	-1.70454
281	36NeopentaneNeopentane100	-1.77	-1.21	-0.77	-0.45	-1.74209
282	36NeopentaneNeopentane105	-1.68	-1.24	-1.37	-1.47	-1.62466
283	36NeopentaneNeopentane110	-1.54	-1.19	-1.49	-1.71	-1.5021
284	36NeopentaneNeopentane125	-1.05	-0.9	-0.8	-0.73	-1.01832
285	36NeopentaneNeopentane150	-0.5	-0.51	-0.46	-0.43	-0.497189
286	36NeopentaneNeopentane200	-0.14	-0.13	-0.13	-0.13	-0.13246
287	37CyclopentaneNeopentane090	-1.61	-0.23	-0.75	-1.13	-1.57585
288	37CyclopentaneNeopentane095	-2.25	-1.15	-1.68	-2.06	-2.21712
289	37CyclopentaneNeopentane100	-2.41	-1.53	-2.14	-2.58	-2.37278
290	37CyclopentaneNeopentane105	-2.33	-1.62	-2.17	-2.57	-2.29461
291	37CyclopentaneNeopentane110	-2.14	-1.58	-1.76	-1.9	-2.11081
292	37CyclopentaneNeopentane125	-1.47	-1.2	-1.26	-1.3	-1.44924
293	37CyclopentaneNeopentane150	-0.71	-0.66	-0.63	-0.61	-0.698891
294	37CyclopentaneNeopentane200	-0.19	-0.18	-0.17	-0.16	-0.188656
295	38CyclopentaneCyclopentane090	-2.24	-0.62	-1.7	-2.49	-2.19808
296	38CyclopentaneCyclopentane095	-2.84	-1.56	-2.2	-2.66	-2.80041
297	38CyclopentaneCyclopentane100	-3	-1.96	-2.22	-2.42	-2.95617
298	38CyclopentaneCyclopentane105	-2.86	-2.05	-2.48	-2.8	-2.82352
299	38CyclopentaneCyclopentane110	-2.6	-1.95	-2.28	-2.53	-2.56285
300	38CyclopentaneCyclopentane125	-1.71	-1.4	-1.27	-1.17	-1.69325
301	38CyclopentaneCyclopentane150	-0.79	-0.71	-0.71	-0.71	-0.780367
302	38CyclopentaneCyclopentane200	-0.2	-0.2	-0.2	-0.2	-0.200665
303	39BenzeneCyclopentane090	-2.16	0.23	-1.11	-2.09	-1.9687
304	39BenzeneCyclopentane095	-3.24	-1.34	-2.38	-3.15	-3.08098
305	39BenzeneCyclopentane100	-3.57	-2.1	-2.93	-3.52	-3.43781
306	39BenzeneCyclopentane105	-3.47	-2.35	-2.81	-3.14	-3.36393
307	39BenzeneCyclopentane110	-3.17	-2.32	-2.63	-2.86	-3.08312
308	39BenzeneCyclopentane125	-2.07	-1.7	-1.91	-2.07	-2.02564
309	39BenzeneCyclopentane150	-0.9	-0.81	-0.83	-0.85	-0.88369
310	39BenzeneCyclopentane200	-0.19	-0.18	-0.13	-0.1	-0.188667
311	40BenzeneNeopentane090	-1.86	-0.13	-1.04	-1.7	-1.7119
312	40BenzeneNeopentane095	-2.68	-1.34	-2	-2.47	-2.54891
313	40BenzeneNeopentane100	-2.89	-1.87	-2.63	-3.18	-2.79053
314	40BenzeneNeopentane105	-2.8	-2.04	-2.41	-2.68	-2.72088
315	40BenzeneNeopentane110	-2.57	-1.99	-2.27	-2.46	-2.5023
316	40BenzeneNeopentane125	-1.7	-1.22	-1.56	-1.8	-1.67429
317	40BenzeneNeopentane150	-0.77	-0.71	-0.73	-0.74	-0.762121
318	40BenzeneNeopentane200	-0.19	-0.18	-0.22	-0.24	-0.186544
319	41UracilPentane090	-3.83	-0.98	-2.81	-4.14	-3.67913
320	41UracilPentane095	-4.69	-2.39	-3.49	-4.29	-4.56038
321	41UracilPentane100	-4.84	-3.01	-3.83	-4.42	-4.72406
322	41UracilPentane105	-4.6	-3.16	-3.98	-4.58	-4.50168
323	41UracilPentane110	-4.08	-2.95	-3.32	-3.58	-3.99925
324	41UracilPentane125	-2.44	-2.02	-2.12	-2.2	-2.40241
325	41UracilPentane150	-0.98	-0.84	-0.75	-0.68	-0.961312
326	41UracilPentane200	-0.21	-0.18	-0.18	-0.18	-0.212103
327	42UracilCyclopentane090	-3.05	-0.61	-2.12	-3.23	-2.89976
328	42UracilCyclopentane095	-3.97	-1.9	-3	-3.8	-3.83639
329	42UracilCyclopentane100	-4.13	-2.5	-3.24	-3.78	-4.01859
330	42UracilCyclopentane105	-3.92	-2.5	-3.33	-3.94	-3.82252
331	42UracilCyclopentane110	-3.54	-2.46	-2.94	-3.28	-3.45872
332	42UracilCyclopentane125	-2.29	-1.75	-1.94	-2.07	-2.2488
333	42UracilCyclopentane150	-1.02	-0.85	-1.13	-1.33	-1.00044
334	42UracilCyclopentane200	-0.25	-0.22	-0.22	-0.22	-0.24558
335	43UracilNeopentane090	-2.87	-2.57	-2.17	-1.87	-2.75624
336	43UracilNeopentane095	-3.6	-2.07	-2.97	-3.62	-3.49966
337	43UracilNeopentane100	-3.7	-2.5	-3.12	-3.57	-3.61265
338	43UracilNeopentane105	-3.49	-2.57	-3.01	-3.33	-3.4152
339	43UracilNeopentane110	-3.15	-2.47	-2.74	-2.94	-3.0833
340	43UracilNeopentane125	-2.05	-1.71	-1.68	-1.66	-2.01329
341	43UracilNeopentane150	-0.92	-0.8	-0.88	-0.93	-0.912106
342	43UracilNeopentane200	-0.23	-0.21	-0.21	-0.21	-0.228658
343	44EthenePentane090	-1.66	-0.39	-0.85	-1.19	-1.59748
344	44EthenePentane095	-1.97	-0.92	-1.34	-1.64	-1.91823
345	44EthenePentane100	-1.99	-1.17	-1.62	-1.95	-1.94265
346	44EthenePentane105	-1.86	-1.22	-1.59	-1.86	-1.82187
347	44EthenePentane110	-1.67	-1.16	-1.19	-1.22	-1.63925
348	44EthenePentane125	-1.09	-0.83	-0.95	-1.04	-1.06878
349	44EthenePentane150	-0.49	-0.41	-0.48	-0.52	-0.481353
350	44EthenePentane200	-0.12	-0.1	-0.1	-0.1	-0.117369
351	45EthynePentane090	-1.13	0.35	-0.5	-1.12	-0.991646
352	45EthynePentane095	-1.63	-0.49	-1.17	-1.66	-1.50954
353	45EthynePentane100	-1.75	-0.83	-1.41	-1.84	-1.64553
354	45EthynePentane105	-1.68	-0.95	-1.31	-1.57	-1.5887
355	45EthynePentane110	-1.52	-0.95	-1.22	-1.42	-1.44438
356	45EthynePentane125	-0.98	-0.7	-0.82	-0.91	-0.932426
357	45EthynePentane150	-0.42	4.24	-0.36	-3.73	-0.400234
358	45EthynePentane200	-0.1	-0.08	-0.08	-0.07	-0.0916728
359	46PeptidePentane090	-3.75	-1.57	-2.64	-3.42	-3.65478
360	46PeptidePentane095	-4.21	-2.44	-3.27	-3.87	-4.115
361	46PeptidePentane100	-4.24	-2.8	-3.55	-4.1	-4.16179
362	46PeptidePentane105	-4.05	-2.84	-3.29	-3.63	-3.97387
363	46PeptidePentane110	-3.73	-2.76	-3.31	-3.71	-3.66489
364	46PeptidePentane125	-2.63	-2.06	-2.5	-2.81	-2.58551
365	46PeptidePentane150	-1.19	-1.01	-1.15	-1.26	-1.17157
366	46PeptidePentane200	-0.29	-0.25	-0.24	-0.23	-0.282057
367	47BenzeneBenzeneTS090	-1.64	0.19	-0.94	-1.76	-1.49324
368	47BenzeneBenzeneTS095	-2.58	-1.18	-2.02	-2.63	-2.45197
369	47BenzeneBenzeneTS100	-2.87	-1.79	-2.36	-2.78	-2.76169
370	47BenzeneBenzeneTS105	-2.82	-1.98	-2.41	-2.72	-2.73088
371	47BenzeneBenzeneTS110	-2.6	-1.97	-2.26	-2.48	-2.53572
372	47BenzeneBenzeneTS125	-1.77	-1.49	-1.58	-1.65	-1.73413
373	47BenzeneBenzeneTS150	-0.83	-0.77	-0.78	-0.79	-0.817747
374	47BenzeneBenzeneTS200	-0.22	-0.23	-0.35	-0.43	-0.222016
375	48PyridinePyridineTS090	-2.53	-0.79	-1.71	-2.39	-2.40152
376	48PyridinePyridineTS095	-3.31	-1.95	-2.87	-3.55	-3.19871
377	48PyridinePyridineTS100	-3.53	-2.47	-3.18	-3.7	-3.43979
378	48PyridinePyridineTS105	-3.45	-2.62	-3.06	-3.39	-3.37507
379	48PyridinePyridineTS110	-3.22	-2.57	-2.87	-3.08	-3.15369
380	48PyridinePyridineTS125	-2.29	-1.99	-2.18	-2.33	-2.25925
381	48PyridinePyridineTS150	-1.18	-1.13	-1.09	-1.07	-1.16835
382	48PyridinePyridineTS200	-0.37	0.34	-0.31	-0.79	-0.370157
383	49BenzenePyridineTS090	-2.09	-0.31	-1.42	-2.24	-1.94501
384	49BenzenePyridineTS095	-3.04	-1.69	-2.4	-2.91	-2.92164
385	49BenzenePyridineTS100	-3.32	-2.29	-2.84	-3.24	-3.2258
386	49BenzenePyridineTS105	-3.26	-2.47	-3.29	-3.89	-3.17573
387	49BenzenePyridineTS110	-3.02	-2.39	-2.72	-2.96	-2.95491
388	49BenzenePyridineTS125	-2.1	-1.84	-1.87	-1.9	-2.06781
389	49BenzenePyridineTS150	-1.05	-1.02	-0.99	-0.98	-1.04165
390	49BenzenePyridineTS200	-0.33	-0.32	-0.45	-0.54	-0.331789
391	50BenzeneEthyneCHpi090	-1.87	-0.54	-1.44	-2.1	-1.79084
392	50BenzeneEthyneCHpi095	-2.65	-1.56	-2.32	-2.88	-2.58043
393	50BenzeneEthyneCHpi100	-2.86	-2.02	-2.61	-3.05	-2.80969
394	50BenzeneEthyneCHpi105	-2.79	-2.16	-2.6	-2.93	-2.74707
395	50BenzeneEthyneCHpi110	-2.58	-2.05	-2.43	-2.71	-2.54513
396	50BenzeneEthyneCHpi125	-1.79	-1.61	-1.72	-1.8	-1.7721
397	50BenzeneEthyneCHpi150	-0.89	-0.89	-0.9	-0.91	-0.88985
398	50BenzeneEthyneCHpi200	-0.27	-0.3	-0.42	-0.5	-0.27212
399	51EthyneEthyneTS090	-1.21	-0.7	-1	-1.22	-1.16975
400	51EthyneEthyneTS095	-1.47	-1.01	-1.32	-1.54	-1.43404
401	51EthyneEthyneTS100	-1.52	-1.17	-1.41	-1.58	-1.48941
402	51EthyneEthyneTS105	-1.46	-1.17	-1.38	-1.53	-1.43134
403	51EthyneEthyneTS110	-1.35	-1.13	-1.28	-1.4	-1.31762
404	51EthyneEthyneTS125	-0.93	-0.84	-0.91	-0.97	-0.913488
405	51EthyneEthyneTS150	-0.46	-0.45	-0.45	-0.46	-0.4518
406	51EthyneEthyneTS200	-0.14	-0.15	-0.13	-0.12	-0.133953
407	52BenzeneAcOHOHpi090	-3.97	-2.22	-3.32	-4.11	-3.90822
408	52BenzeneAcOHOHpi095	-4.58	-3.13	-4.54	-5.57	-4.52526
409	52BenzeneAcOHOHpi100	-4.7	-3.52	-4.76	-5.66	-4.65525
410	52BenzeneAcOHOHpi105	-4.55	-3.56	-4.27	-4.78	-4.50756
411	52BenzeneAcOHOHpi110	-4.25	-3.43	-4.02	-4.44	-4.21346
412	52BenzeneAcOHOHpi125	-3.13	-2.65	-3.14	-3.49	-3.10667
413	52BenzeneAcOHOHpi150	-1.7	-1.53	-1.8	-2	-1.69725
414	52BenzeneAcOHOHpi200	-0.55	-0.52	-0.59	-0.63	-0.553786
415	53BenzeneAcNH2NHpi090	-3.79	-2.44	-3.6	-4.45	-3.7675
416	53BenzeneAcNH2NHpi095	-4.27	-3.12	-4	-4.65	-4.24208
417	53BenzeneAcNH2NHpi100	-4.36	-3.42	-3.93	-4.3	-4.33419
418	53BenzeneAcNH2NHpi105	-4.23	-3.45	-3.76	-3.98	-4.20138
419	53BenzeneAcNH2NHpi110	-3.97	-3.33	-3.53	-3.67	-3.94465
420	53BenzeneAcNH2NHpi125	-2.97	-2.62	-2.89	-3.09	-2.95996
421	53BenzeneAcNH2NHpi150	-1.65	-1.52	-1.64	-1.73	-1.64141
422	53BenzeneAcNH2NHpi200	-0.48	-0.47	-0.34	-0.25	-0.480903
423	54BenzeneWaterOHpi090	-2.8	-1.63	-2.42	-3	-2.74512
424	54BenzeneWaterOHpi095	-3.21	-2.28	-2.85	-3.26	-3.16118
425	54BenzeneWaterOHpi100	-3.27	-2.52	-2.93	-3.23	-3.22366
426	54BenzeneWaterOHpi105	-3.13	-2.53	-2.88	-3.14	-3.09425
427	54BenzeneWaterOHpi110	-2.9	-2.42	-2.69	-2.88	-2.87037
428	54BenzeneWaterOHpi125	-2.1	-1.82	-2	-2.12	-2.08886
429	54BenzeneWaterOHpi150	-1.16	-1.07	-1.16	-1.22	-1.15401
430	54BenzeneWaterOHpi200	-0.42	-0.42	-0.75	-0.99	-0.417078
431	55BenzeneMeOHOHpi090	-3.45	-1.54	-2.79	-3.71	-3.338
432	55BenzeneMeOHOHpi095	-4.05	-2.5	-3.51	-4.26	-3.9499
433	55BenzeneMeOHOHpi100	-4.19	-2.92	-3.7	-4.27	-4.10581
434	55BenzeneMeOHOHpi105	-4.07	-2.96	-3.67	-4.18	-3.9982
435	55BenzeneMeOHOHpi110	-3.8	-2.99	-3.48	-3.84	-3.74932
436	55BenzeneMeOHOHpi125	-2.8	-2.34	-2.79	-3.11	-2.77441
437	55BenzeneMeOHOHpi150	-1.53	-1.42	-1.45	-1.48	-1.52391
438	55BenzeneMeOHOHpi200	-0.52	-0.52	-0.52	-0.52	-0.518123
439	56BenzeneMeNH2NHpi090	-2.51	-0.67	-1.86	-2.73	-2.38091
440	56BenzeneMeNH2NHpi095	-3.09	-1.65	-2.48	-3.09	-2.97661
441	56BenzeneMeNH2NHpi100	-3.23	-2.07	-2.68	-3.14	-3.13876
442	56BenzeneMeNH2NHpi105	-3.12	-2.22	-2.68	-3.01	-3.04387
443	56BenzeneMeNH2NHpi110	-2.86	-2.15	-2.5	-2.76	-2.80285
444	56BenzeneMeNH2NHpi125	-1.95	-1.61	-1.75	-1.85	-1.92243
445	56BenzeneMeNH2NHpi150	-0.94	-0.84	-0.87	-0.89	-0.93271
446	56BenzeneMeNH2NHpi200	-0.26	-0.25	-0.57	-0.81	-0.260262
447	57BenzenePeptideNHpi090	-3.75	-1.35	-2.74	-3.75	-3.59468
448	57BenzenePeptideNHpi095	-4.96	-3.12	-4.11	-4.83	-4.82807
449	57BenzenePeptideNHpi100	-5.28	-3.86	-4.93	-5.71	-5.17609
450	57BenzenePeptideNHpi105	-5.14	-4	-4.84	-5.45	-5.0589
451	57BenzenePeptideNHpi110	-4.78	-3.86	-4.56	-5.07	-4.71472
452	57BenzenePeptideNHpi125	-3.41	-2.99	-3.47	-3.82	-3.38389
453	57BenzenePeptideNHpi150	-1.8	-1.67	-1.77	-1.84	-1.79943
454	57BenzenePeptideNHpi200	-0.62	-0.61	-0.54	-0.49	-0.619431
455	58PyridinePyridineCHN090	-2.8	-1.95	-2.43	-2.78	-2.88416
456	58PyridinePyridineCHN095	-3.82	-3.17	-3.33	-3.44	-3.86933
457	58PyridinePyridineCHN100	-4.15	-3.7	-4.02	-4.25	-4.16646
458	58PyridinePyridineCHN105	-3.89	-3.58	-3.82	-4	-3.88977
459	58PyridinePyridineCHN110	-3.45	-3.23	-3.71	-4.07	-3.44199
460	58PyridinePyridineCHN125	-2.18	-2.12	-2.09	-2.07	-2.17336
461	58PyridinePyridineCHN150	-1.01	-1.02	-1.01	-1	-1.00513
462	58PyridinePyridineCHN200	-0.28	-0.25	-0.3	-0.34	-0.274043
463	59EthyneWaterCHO090	-2.52	-2.18	-2.56	-2.83	-2.60366
464	59EthyneWaterCHO095	-2.8	-2.53	-2.8	-3	-2.86494
465	59EthyneWaterCHO100	-2.85	-2.64	-2.84	-2.98	-2.89872
466	59EthyneWaterCHO105	-2.76	-2.6	-2.75	-2.87	-2.79927
467	59EthyneWaterCHO110	-2.6	-2.48	-2.6	-2.68	-2.62788
468	59EthyneWaterCHO125	-1.98	-1.93	-2	-2.04	-1.99931
469	59EthyneWaterCHO150	-1.17	-1.2	-1.19	-1.18	-1.17815
470	59EthyneWaterCHO200	-0.46	-0.5	-0.48	-0.46	-0.461297
471	60EthyneAcOHOHpi090	-4.28	-3.29	-3.94	-4.42	-4.30609
472	60EthyneAcOHOHpi095	-4.78	-3.92	-4.47	-4.88	-4.7866
473	60EthyneAcOHOHpi100	-4.86	-4.13	-4.74	-5.18	-4.85415
474	60EthyneAcOHOHpi105	-4.69	-4.07	-4.62	-5.02	-4.67874
475	60EthyneAcOHOHpi110	-4.39	-3.86	-4.33	-4.67	-4.37113
476	60EthyneAcOHOHpi125	-3.26	-2.92	-3.23	-3.45	-3.23436
477	60EthyneAcOHOHpi150	-1.77	-1.63	-1.73	-1.81	-1.76008
478	60EthyneAcOHOHpi200	-0.56	-0.54	-0.54	-0.54	-0.555852
479	61PentaneAcOH090	-2.7	-1.23	-1.88	-2.36	-2.62929
480	61PentaneAcOH095	-2.9	-1.69	-2.22	-2.61	-2.83503
481	61PentaneAcOH100	-2.88	-1.88	-2.3	-2.6	-2.8197
482	61PentaneAcOH105	-2.73	-1.87	-2.4	-2.79	-2.67689
483	61PentaneAcOH110	-2.52	-1.81	-2.08	-2.27	-2.46742
484	61PentaneAcOH125	-1.79	-1.37	-1.53	-1.66	-1.75749
485	61PentaneAcOH150	-0.78	-0.65	-0.67	-0.68	-0.772646
486	61PentaneAcOH200	-0.17	-0.15	-0.14	-0.14	-0.165994
487	62PentaneAcNH2090	-3.15	-0.86	-2.35	-3.44	-3.07359
488	62PentaneAcNH2095	-3.5	-2.02	-2.6	-3.02	-3.42638
489	62PentaneAcNH2100	-3.51	-2.25	-2.75	-3.11	-3.43722
490	62PentaneAcNH2105	-3.32	-2.3	-2.89	-3.32	-3.25919
491	62PentaneAcNH2110	-3.04	-2.22	-2.52	-2.74	-2.98775
492	62PentaneAcNH2125	-2.12	-1.65	-1.99	-2.23	-2.07844
493	62PentaneAcNH2150	-1.04	-0.88	-0.94	-0.98	-1.02451
494	62PentaneAcNH2200	-0.27	-0.24	-0.25	-0.25	-0.268049
495	63BenzeneAcOH090	-2.73	-0.57	-1.81	-2.71	-2.54659
496	63BenzeneAcOH095	-3.6	-1.84	-2.82	-3.53	-3.44386
497	63BenzeneAcOH100	-3.8	-2.47	-3.45	-4.16	-3.67136
498	63BenzeneAcOH105	-3.65	-2.61	-3.16	-3.56	-3.54622
499	63BenzeneAcOH110	-3.34	-2.53	-2.95	-3.25	-3.25335
500	63BenzeneAcOH125	-2.24	-1.83	-2.01	-2.14	-2.19512
501	63BenzeneAcOH150	-1.02	-0.9	-0.97	-1.02	-1.00733
502	63BenzeneAcOH200	-0.26	-0.26	-0.19	-0.14	-0.258702
503	64PeptideEthene090	-2.6	-1.2	-2.02	-2.62	-2.52687
504	64PeptideEthene095	-2.95	-1.81	-2.47	-2.94	-2.88149
505	64PeptideEthene100	-2.99	-2.06	-2.79	-3.31	-2.9279
506	64PeptideEthene105	-2.85	-2.1	-2.53	-2.84	-2.80104
507	64PeptideEthene110	-2.63	-2.02	-2.36	-2.6	-2.58541
508	64PeptideEthene125	-1.86	-1.53	-1.68	-1.78	-1.8281
509	64PeptideEthene150	-0.88	-0.78	-0.81	-0.83	-0.866895
510	64PeptideEthene200	-0.19	-0.11	-0.18	-0.23	-0.187642
511	65PyridineEthyne090	-3.54	-3.18	-3.57	-3.86	-3.66054
512	65PyridineEthyne095	-3.91	-3.62	-3.9	-4.11	-4.00764
513	65PyridineEthyne100	-3.99	-3.76	-3.96	-4.11	-4.06567
514	65PyridineEthyne105	-3.89	-3.71	-3.85	-3.96	-3.94577
515	65PyridineEthyne110	-3.68	-3.53	-3.64	-3.73	-3.72406
516	65PyridineEthyne125	-2.84	-2.79	-2.82	-2.83	-2.8661
517	65PyridineEthyne150	-1.67	-1.7	-1.73	-1.76	-1.67923
518	65PyridineEthyne200	-0.62	-0.65	-0.67	-0.68	-0.618433
519	66MeNH2Pyridine090	-3.45	-1.77	-2.67	-3.32	-3.35962
520	66MeNH2Pyridine095	-3.88	-2.5	-3.22	-3.74	-3.79562
521	66MeNH2Pyridine100	-3.97	-2.84	-3.43	-3.85	-3.89254
522	66MeNH2Pyridine105	-3.85	-2.92	-3.41	-3.77	-3.78432
523	66MeNH2Pyridine110	-3.62	-2.86	-3.18	-3.41	-3.56039
524	66MeNH2Pyridine125	-2.71	-2.3	-2.44	-2.54	-2.67699
525	66MeNH2Pyridine150	-1.5	-1.34	-1.58	-1.77	-1.4875
526	66MeNH2Pyridine200	-0.49	-0.47	-0.39	-0.34	-0.490416
527

## Sheet: sosex w(0), w(0) with PBE0
		Hobza	TZ3P	QZ6P	CBS	sterling silver
		REF	1.15807	0.569864	0.353217	0.103549
RMSD	Full	0.103549	1.13254	0.565264	0.397872	REF
	H bonds	0.110601	1.18437	0.740835	0.489453
	pi stack	0.169447	1.59474	0.557854	0.533251
	London	0.0690192	0.934889	0.443896	0.281279
	mixed	0.0622365	0.883545	0.375526	0.231948
0	01WaterWater095	-4.88	-3.94	-4.22	-4.43	-4.95383
1	01WaterWater100	-4.89	-4.1	-4.47	-4.75	-4.94643
2	01WaterWater105	-4.72	-4.05	-4.27	-4.43	-4.76207
3	01WaterWater110	-4.45	-3.89	-4.08	-4.21	-4.47984
4	01WaterWater125	-3.46	-3.12	-3.24	-3.32	-3.4705
5	01WaterWater150	-2.11	-1.97	-2.01	-2.04	-2.11656
6	01WaterWater200	-0.87	-0.84	-0.84	-0.84	-0.874474
7	02WaterMeOH090	-5.19	-4.04	-4.57	-4.96	-5.29836
8	02WaterMeOH095	-5.55	-4.58	-4.96	-5.24	-5.62873
9	02WaterMeOH100	-5.57	-4.76	-4.96	-5.1	-5.62675
10	02WaterMeOH105	-5.38	-4.71	-4.94	-5.11	-5.42332
11	02WaterMeOH110	-5.08	-4.48	-4.66	-4.8	-5.10642
12	02WaterMeOH125	-3.94	-3.6	-3.71	-3.79	-3.95632
13	02WaterMeOH150	-2.39	-2.25	-2.28	-2.31	-2.39149
14	02WaterMeOH200	-0.95	-0.93	-0.92	-0.92	-0.954245
15	03WaterMeNH2090	-6.49	-5.25	-5.74	-6.1	-6.60638
16	03WaterMeNH2095	-6.87	-5.8	-6.07	-6.26	-6.95721
17	03WaterMeNH2100	-6.88	-5.96	-6.19	-6.35	-6.94056
18	03WaterMeNH2105	-6.65	-5.87	-6.05	-6.19	-6.69539
19	03WaterMeNH2110	-6.28	-5.62	-5.95	-6.2	-6.31753
20	03WaterMeNH2125	-4.92	-4.48	-4.67	-4.8	-4.92823
21	03WaterMeNH2150	-2.98	-2.79	-2.95	-3.06	-2.97972
22	03WaterMeNH2200	-1.14	-1.1	-1.1	-1.1	-1.14169
23	04WaterPeptide090	-7.63	-6.15	-6.7	-7.1	-7.73932
24	04WaterPeptide095	-8.06	-6.79	-7.56	-8.12	-8.13066
25	04WaterPeptide100	-8.08	-7	-7.26	-7.45	-8.12775
26	04WaterPeptide105	-7.84	-6.96	-7.14	-7.27	-7.87768
27	04WaterPeptide110	-7.46	-6.68	-6.85	-6.97	-7.48215
28	04WaterPeptide125	-5.99	-5.52	-5.7	-5.83	-5.99425
29	04WaterPeptide150	-3.83	-3.59	-3.64	-3.68	-3.83009
30	04WaterPeptide200	-1.44	-1.4	-1.75	-2	-1.43887
31	05MeOHMeOH090	-5.28	-3.97	-4.39	-4.69	-5.38667
32	05MeOHMeOH095	-5.69	-4.59	-5.08	-5.44	-5.77098
33	05MeOHMeOH100	-5.75	-4.81	-5.13	-5.36	-5.8036
34	05MeOHMeOH105	-5.58	-4.79	-5.06	-5.25	-5.62
35	05MeOHMeOH110	-5.28	-4.62	-4.85	-5.01	-5.31207
36	05MeOHMeOH125	-4.14	-3.74	-3.86	-3.94	-4.15067
37	05MeOHMeOH150	-2.52	-2.36	-2.4	-2.42	-2.5284
38	05MeOHMeOH200	-1.01	-0.98	-1	-1.01	-1.01101
39	06MeOHMeNH2090	-6.97	-5.36	-5.72	-5.98	-7.08127
40	06MeOHMeNH2095	-7.47	-6.09	-6.34	-6.52	-7.55441
41	06MeOHMeNH2100	-7.54	-6.36	-6.79	-7.1	-7.60087
42	06MeOHMeNH2105	-7.34	-6.33	-6.94	-7.39	-7.37783
43	06MeOHMeNH2110	-6.97	-6.11	-6.76	-7.23	-6.99427
44	06MeOHMeNH2125	-5.5	-4.97	-5.27	-5.49	-5.50482
45	06MeOHMeNH2150	-3.35	-3.1	-3.2	-3.28	-3.34489
46	06MeOHMeNH2200	-1.27	-1.22	-1.2	-1.19	-1.27327
47	07MeOHPeptide090	-7.63	-5.94	-6.52	-6.94	-7.75614
48	07MeOHPeptide095	-8.14	-6.68	-7.23	-7.64	-8.23517
49	07MeOHPeptide100	-8.22	-6.96	-7.44	-7.79	-8.28898
50	07MeOHPeptide105	-8.02	-6.93	-7.46	-7.85	-8.07188
51	07MeOHPeptide110	-7.66	-6.72	-7.11	-7.4	-7.69153
52	07MeOHPeptide125	-6.18	-5.56	-5.73	-5.84	-6.18753
53	07MeOHPeptide150	-3.65	-3.38	-3.48	-3.54	-3.64659
54	07MeOHPeptide200	-1.1	-1.07	-1.06	-1.05	-1.09751
55	08MeOHWater090	-4.59	-3.39	-3.8	-4.11	-4.67513
56	08MeOHWater095	-4.95	-3.94	-4.23	-4.44	-5.01703
57	08MeOHWater100	-5	-4.14	-4.39	-4.57	-5.04458
58	08MeOHWater105	-4.85	-4.13	-4.34	-4.49	-4.88113
59	08MeOHWater110	-4.59	-3.97	-4.16	-4.3	-4.60958
60	08MeOHWater125	-3.59	-3.21	-3.35	-3.46	-3.59767
61	08MeOHWater150	-2.2	-2.04	-2.09	-2.13	-2.20477
62	08MeOHWater200	-0.91	-0.88	-0.87	-0.87	-0.909327
63	09MeNH2MeOH090	-2.81	-1.9	-2.4	-2.77	-2.83742
64	09MeNH2MeOH095	-3.04	-2.29	-2.63	-2.87	-3.05113
65	09MeNH2MeOH100	-3.04	-2.43	-2.66	-2.82	-3.03663
66	09MeNH2MeOH105	-2.9	-2.4	-2.8	-3.1	-2.89242
67	09MeNH2MeOH110	-2.69	-2.29	-2.47	-2.6	-2.6818
68	09MeNH2MeOH125	-1.98	-1.76	-1.83	-1.88	-1.97082
69	09MeNH2MeOH150	-1.1	-1.01	-1.03	-1.05	-1.09813
70	09MeNH2MeOH200	-0.39	-0.38	-0.27	-0.2	-0.393125
71	10MeNH2MeNH2090	-3.7	-2.29	-2.9	-3.35	-3.72176
72	10MeNH2MeNH2095	-4.09	-2.93	-3.31	-3.59	-4.10425
73	10MeNH2MeNH2100	-4.15	-3.19	-3.4	-3.56	-4.1526
74	10MeNH2MeNH2105	-4.01	-3.22	-3.55	-3.8	-4.00192
75	10MeNH2MeNH2110	-3.75	-3.1	-3.37	-3.57	-3.74167
76	10MeNH2MeNH2125	-2.79	-2.43	-2.52	-2.59	-2.78069
77	10MeNH2MeNH2150	-1.31	-1.19	-1.22	-1.24	-1.30176
78	10MeNH2MeNH2200	-0.39	-0.37	-0.37	-0.37	-0.385362
79	11MeNH2Peptide090	-4.95	-3.22	-4	-4.57	-4.95826
80	11MeNH2Peptide095	-5.36	-3.89	-4.53	-5	-5.35424
81	11MeNH2Peptide100	-5.41	-4.17	-4.69	-5.07	-5.39666
82	11MeNH2Peptide105	-5.24	-4.19	-4.53	-4.78	-5.22226
83	11MeNH2Peptide110	-4.94	-4.06	-4.33	-4.53	-4.92339
84	11MeNH2Peptide125	-3.21	-2.8	-2.92	-3	-3.19683
85	11MeNH2Peptide150	-1.4	-1.3	-1.43	-1.52	-1.39662
86	11MeNH2Peptide200	-0.46	-0.44	-0.44	-0.45	-0.454835
87	12MeNH2Water090	-6.75	-5.34	-5.9	-6.31	-6.86088
88	12MeNH2Water095	-7.2	-6	-6.39	-6.68	-7.29079
89	12MeNH2Water100	-7.25	-6.22	-6.52	-6.73	-7.3118
90	12MeNH2Water105	-7.03	-6.16	-6.58	-6.89	-7.07662
91	12MeNH2Water110	-6.66	-5.92	-6.28	-6.55	-6.69088
92	12MeNH2Water125	-5.22	-4.74	-4.88	-4.98	-5.23057
93	12MeNH2Water150	-3.15	-2.94	-3	-3.05	-3.15494
94	12MeNH2Water200	-1.2	-1.15	-1.15	-1.15	-1.19627
95	13PeptideMeOH090	-5.67	-4.27	-4.99	-5.51	-5.75338
96	13PeptideMeOH095	-6.11	-4.93	-5.48	-5.88	-6.16512
97	13PeptideMeOH100	-6.18	-5.2	-5.63	-5.95	-6.22026
98	13PeptideMeOH105	-6.03	-5.19	-5.56	-5.83	-6.05408
99	13PeptideMeOH110	-5.74	-5.03	-5.33	-5.55	-5.75857
100	13PeptideMeOH125	-4.6	-4.18	-4.21	-4.24	-4.60846
101	13PeptideMeOH150	-2.95	-2.76	-2.82	-2.86	-2.94801
102	13PeptideMeOH200	-1.3	-1.27	-1.28	-1.28	-1.30709
103	14PeptideMeNH2090	-6.81	-5.24	-6.05	-6.64	-6.90681
104	14PeptideMeNH2095	-7.34	-6	-6.47	-6.81	-7.41129
105	14PeptideMeNH2100	-7.45	-6.31	-6.69	-6.97	-7.50022
106	14PeptideMeNH2105	-7.29	-8.91	-6.65	-5.01	-7.32364
107	14PeptideMeNH2110	-6.97	-6.14	-6.35	-6.51	-6.98556
108	14PeptideMeNH2125	-5.61	-5.1	-5.31	-5.46	-5.61042
109	14PeptideMeNH2150	-3.55	-3.31	-3.54	-3.7	-3.54879
110	14PeptideMeNH2200	-1.49	-1.43	-1.44	-1.45	-1.4882
111	15PeptidePeptide090	-8.02	-6.32	-7.07	-7.62	-8.09631
112	15PeptidePeptide095	-8.53	-7.08	-7.67	-8.11	-8.58646
113	15PeptidePeptide100	-8.62	-7.38	-7.94	-8.34	-8.65929
114	15PeptidePeptide105	-8.45	-7.38	-7.86	-8.22	-8.46406
115	15PeptidePeptide110	-8.1	-7.18	-7.3	-7.4	-8.10479
116	15PeptidePeptide125	-6.66	-6.08	-6.57	-6.93	-6.64877
117	15PeptidePeptide150	-4.42	-4.13	-4.44	-4.67	-4.40743
118	15PeptidePeptide200	-1.77	-1.71	-2.03	-2.26	-1.7751
119	16PeptideWater090	-4.7	-3.65	-3.92	-4.12	-4.76122
120	16PeptideWater095	-5.06	-4.18	-4.57	-4.87	-5.10831
121	16PeptideWater100	-5.12	-4.38	-4.88	-5.25	-5.14965
122	16PeptideWater105	-4.98	-4.36	-4.5	-4.59	-5.00493
123	16PeptideWater110	-4.74	-4.22	-4.26	-4.29	-4.75391
124	16PeptideWater125	-3.79	-3.49	-3.51	-3.53	-3.79918
125	16PeptideWater150	-2.45	-2.3	-2.35	-2.39	-2.45383
126	16PeptideWater200	-1.13	-1.11	-1.09	-1.08	-1.13683
127	17UracilUracilBP090	-15.7	-13.18	-14.44	-15.37	-16.0658
128	17UracilUracilBP095	-16.9	-14.73	-15.61	-16.25	-17.1875
129	17UracilUracilBP100	-17.18	-15.34	-15.89	-16.29	-17.4054
130	17UracilUracilBP105	-16.86	-15.28	-16.13	-16.76	-17.0338
131	17UracilUracilBP110	-16.17	-14.84	-15.31	-15.65	-16.293
132	17UracilUracilBP125	-13.15	-12.32	-12.7	-12.98	-13.1904
133	17UracilUracilBP150	-8.35	-7.98	-8.21	-8.38	-8.35706
134	17UracilUracilBP200	-3.33	-3.28	-3.28	-3.29	-3.33743
135	18WaterPyridine090	-6.39	-5.33	-5.8	-6.14	-6.4838
136	18WaterPyridine095	-6.8	-5.91	-6.55	-7.01	-6.87005
137	18WaterPyridine100	-6.83	-6.1	-6.39	-6.6	-6.87888
138	18WaterPyridine105	-6.62	-6	-6.1	-6.18	-6.65261
139	18WaterPyridine110	-6.27	-5.75	-5.83	-5.88	-6.28924
140	18WaterPyridine125	-4.93	-4.64	-4.65	-4.66	-4.92902
141	18WaterPyridine150	-3.01	-2.89	-2.88	-2.87	-3.00623
142	18WaterPyridine200	-1.19	-1.18	-1.15	-1.13	-1.18444
143	19MeOHPyridine090	-6.78	-5.44	-6.07	-6.54	-6.8755
144	19MeOHPyridine095	-7.31	-6.16	-6.86	-7.36	-7.37372
145	19MeOHPyridine100	-7.4	-6.42	-6.77	-7.02	-7.44822
146	19MeOHPyridine105	-7.23	-6.39	-6.68	-6.89	-7.25343
147	19MeOHPyridine110	-6.88	-6.18	-6.39	-6.55	-6.89666
148	19MeOHPyridine125	-5.48	-5.05	-5.31	-5.5	-5.47291
149	19MeOHPyridine150	-3.38	-3.21	-3.19	-3.18	-3.37293
150	19MeOHPyridine200	-1.33	-1.31	-0.81	-0.45	-1.32821
151	20AcOHAcOH090	-17.45	-14.42	-15.67	-16.58	-17.9251
152	20AcOHAcOH095	-18.79	-16.15	-17.29	-18.13	-19.1701
153	20AcOHAcOH100	-19.09	-16.84	-17.73	-18.38	-19.3967
154	20AcOHAcOH105	-18.72	-16.72	-17.5	-18.07	-18.9647
155	20AcOHAcOH110	-17.94	-16.19	-17.4	-18.28	-18.1251
156	20AcOHAcOH125	-14.56	-13.39	-14.04	-14.52	-14.6347
157	20AcOHAcOH150	-9.21	-8.61	-8.74	-8.83	-9.21926
158	20AcOHAcOH200	-3.59	-3.45	-3.48	-3.5	-3.59408
159	21AcNH2AcNH2090	-14.93	-12.52	-13.59	-14.38	-15.2739
160	21AcNH2AcNH2095	-16.03	-13.97	-15.07	-15.88	-16.2994
161	21AcNH2AcNH2100	-16.26	-14.5	-15.34	-15.95	-16.4717
162	21AcNH2AcNH2105	-15.94	-14.42	-15.01	-15.44	-16.094
163	21AcNH2AcNH2110	-15.26	-13.97	-14.47	-14.83	-15.3796
164	21AcNH2AcNH2125	-12.42	-11.6	-12.1	-12.46	-12.4598
165	21AcNH2AcNH2150	-8	-7.61	-7.81	-7.96	-8.00668
166	21AcNH2AcNH2200	-3	-2.94	-2.98	-3.01	-3.00804
167	22AcOHUracil090	-17.9	-15.08	-16.51	-17.56	-18.3243
168	22AcOHUracil095	-19.19	-16.75	-17.92	-18.77	-19.5241
169	22AcOHUracil100	-19.49	-17.38	-18.22	-18.84	-19.7586
170	22AcOHUracil105	-19.15	-17.33	-17.84	-18.21	-19.3605
171	22AcOHUracil110	-18.41	-16.83	-17.62	-18.19	-18.5649
172	22AcOHUracil125	-15.14	-14.12	-14.56	-14.89	-15.1977
173	22AcOHUracil150	-9.86	-9.36	-9.36	-9.37	-9.86735
174	22AcOHUracil200	-4.15	-4.04	-4.12	-4.17	-4.14991
175	23AcNH2Uracil090	-17.7	-15.13	-16.24	-17.04	-18.0758
176	23AcNH2Uracil095	-18.89	-16.68	-17.43	-17.98	-19.1946
177	23AcNH2Uracil100	-19.19	-17.29	-18.59	-19.55	-19.4317
178	23AcNH2Uracil105	-18.9	-17.26	-17.85	-18.29	-19.0856
179	23AcNH2Uracil110	-18.22	-16.82	-17.15	-17.39	-18.3674
180	23AcNH2Uracil125	-15.21	-14.3	-14.5	-14.64	-15.2646
181	23AcNH2Uracil150	-10.23	-9.79	-10.35	-10.76	-10.2404
182	23AcNH2Uracil200	-4.65	-4.56	-4.61	-4.66	-4.66191
183	24BenzeneBenzenepipi090	-0.23	2.91	0.74	-0.84	0.137809
184	24BenzeneBenzenepipi095	-2.07	0.26	-1.11	-2.1	-1.79077
185	24BenzeneBenzenepipi100	-2.74	-1.02	-1.96	-2.64	-2.52128
186	24BenzeneBenzenepipi105	-2.8	-1.53	-2.17	-2.63	-2.63293
187	24BenzeneBenzenepipi110	-2.58	-1.63	-1.93	-2.15	-2.44969
188	24BenzeneBenzenepipi125	-1.54	-1.15	-1.43	-1.63	-1.47949
189	24BenzeneBenzenepipi150	-0.49	-0.39	-0.45	-0.48	-0.468184
190	24BenzeneBenzenepipi200	-0.06	-0.04	-0.12	-0.17	-0.0586454
191	25PyridinePyridinepipi090	-1.32	1.94	0.2	-1.07	-0.964221
192	25PyridinePyridinepipi095	-3.17	-0.76	-2.29	-3.41	-2.89122
193	25PyridinePyridinepipi100	-3.83	-2.04	-3.26	-4.14	-3.61049
194	25PyridinePyridinepipi105	-3.86	-2.54	-3.15	-3.61	-3.68858
195	25PyridinePyridinepipi110	-3.58	-2.6	-2.87	-3.07	-3.45182
196	25PyridinePyridinepipi125	-2.36	-1.96	-2.15	-2.3	-2.29922
197	25PyridinePyridinepipi150	-0.96	-0.85	-0.94	-1	-0.945317
198	25PyridinePyridinepipi200	-0.24	-0.22	-0.15	-0.1	-0.233435
199	26UracilUracilpipi090	-7.86	-3.19	-6.02	-8.09	-7.5928
200	26UracilUracilpipi095	-9.5	-5.76	-8.54	-10.57	-9.26565
201	26UracilUracilpipi100	-9.82	-6.9	-9.03	-10.59	-9.61943
202	26UracilUracilpipi105	-9.43	-7.05	-8.38	-9.34	-9.25628
203	26UracilUracilpipi110	-8.69	-6.82	-7.82	-8.54	-8.54106
204	26UracilUracilpipi125	-6.07	-5.1	-6.14	-6.89	-5.99344
205	26UracilUracilpipi150	-3.1	-2.77	-2.89	-2.98	-3.07071
206	26UracilUracilpipi200	-0.99	-0.93	-1.03	-1.1	-0.986244
207	27BenzenePyridinepipi090	-0.73	2.53	0.62	-0.77	-0.362257
208	27BenzenePyridinepipi095	-2.69	-0.06	-1.59	-2.71	-2.41302
209	27BenzenePyridinepipi100	-3.37	-1.61	-2.74	-3.57	-3.15603
210	27BenzenePyridinepipi105	-3.4	-2.1	-2.76	-3.23	-3.23443
211	27BenzenePyridinepipi110	-3.13	-2.17	-2.87	-3.37	-3.00145
212	27BenzenePyridinepipi125	-1.97	-1.58	-1.74	-1.85	-1.91291
213	27BenzenePyridinepipi150	-0.72	-0.63	-0.73	-0.81	-0.705302
214	27BenzenePyridinepipi200	-0.15	-0.13	-0.03	0.04	-0.143097
215	28BenzeneUracilpipi090	-3.53	0.55	-2.37	-4.5	-3.17801
216	28BenzeneUracilpipi095	-5.22	-2.04	-4.14	-5.68	-4.92446
217	28BenzeneUracilpipi100	-5.71	-3.24	-4.83	-5.99	-5.46473
218	28BenzeneUracilpipi105	-5.55	-3.65	-4.6	-5.29	-5.35136
219	28BenzeneUracilpipi110	-5.08	-3.61	-4.44	-5.04	-4.91567
220	28BenzeneUracilpipi125	-3.29	-2.59	-3.05	-3.37	-3.20726
221	28BenzeneUracilpipi150	-1.36	-1.15	-1.2	-1.24	-1.33389
222	28BenzeneUracilpipi200	-0.25	-0.18	-0.48	-0.71	-0.245855
223	29PyridineUracilpipi090	-3.74	0.63	-2.26	-4.38	-3.37441
224	29PyridineUracilpipi095	-6.17	-2.97	-5.34	-7.07	-5.87827
225	29PyridineUracilpipi100	-6.81	-4.44	-6.06	-7.24	-6.5763
226	29PyridineUracilpipi105	-6.58	-4.82	-5.98	-6.82	-6.39132
227	29PyridineUracilpipi110	-5.97	-4.67	-5.27	-5.71	-5.82038
228	29PyridineUracilpipi125	-3.87	-3.33	-3.85	-4.23	-3.79308
229	29PyridineUracilpipi150	-1.78	-1.68	-3.51	-4.85	-1.75215
230	29PyridineUracilpipi200	-0.53	-0.53	-0.51	-0.49	-0.528589
231	30BenzeneEthene090	-0.26	1.91	0.8	-0.02	-0.021002
232	30BenzeneEthene095	-1.13	0.49	-0.32	-0.92	-0.939473
233	30BenzeneEthene100	-1.41	-0.2	-0.77	-1.18	-1.26853
234	30BenzeneEthene105	-1.4	-0.5	-0.89	-1.18	-1.29209
235	30BenzeneEthene110	-1.26	-0.59	-0.82	-0.99	-1.17227
236	30BenzeneEthene125	-0.69	-0.41	-0.54	-0.63	-0.650899
237	30BenzeneEthene150	-0.17	-0.1	0	0.08	-0.159214
238	30BenzeneEthene200	0.01	0.02	0.01	0	0.0132824
239	31UracilEthene090	-2.57	-0.26	-1.81	-2.94	-2.39596
240	31UracilEthene095	-3.24	-1.45	-2.48	-3.23	-3.09153
241	31UracilEthene100	-3.38	-1.98	-2.76	-3.33	-3.25698
242	31UracilEthene105	-3.24	-2.15	-2.73	-3.16	-3.13698
243	31UracilEthene110	-2.96	-2.11	-2.54	-2.85	-2.87826
244	31UracilEthene125	-1.99	-1.59	-1.73	-1.83	-1.94883
245	31UracilEthene150	-0.93	-0.79	-0.89	-0.97	-0.917883
246	31UracilEthene200	-0.25	-0.23	-0.23	-0.23	-0.250618
247	32UracilEthyne090	-2.79	-0.37	-1.78	-2.8	-2.58661
248	32UracilEthyne095	-3.56	-1.75	-2.8	-3.57	-3.38713
249	32UracilEthyne100	-3.74	-2.25	-3.09	-3.71	-3.58724
250	32UracilEthyne105	-3.59	-2.42	-3.08	-3.56	-3.46393
251	32UracilEthyne110	-3.29	-2.37	-2.87	-3.23	-3.18288
252	32UracilEthyne125	-2.23	-1.77	-2.02	-2.2	-2.15864
253	32UracilEthyne150	-1.04	-0.8	-0.96	-1.08	-1.01222
254	32UracilEthyne200	-0.27	-0.25	-0.25	-0.24	-0.264394
255	33PyridineEthene090	-0.89	1.26	0.16	-0.65	-0.667746
256	33PyridineEthene095	-1.62	0.04	-0.79	-1.39	-1.447
257	33PyridineEthene100	-1.86	-0.6	-1.2	-1.64	-1.72072
258	33PyridineEthene105	-1.83	-0.86	-1.29	-1.6	-1.71932
259	33PyridineEthene110	-1.67	-0.95	-1.53	-1.95	-1.58095
260	33PyridineEthene125	-1.03	-0.72	-0.79	-0.85	-0.984842
261	33PyridineEthene150	-0.37	-0.28	-0.41	-0.51	-0.350189
262	33PyridineEthene200	-0.05	-0.04	-0.01	0.01	-0.0416423
263	34PentanePentane090	-2.86	-0.84	-1.59	-2.14	-2.7964
264	34PentanePentane095	-3.62	-2.09	-2.85	-3.41	-3.56378
265	34PentanePentane100	-3.77	-2.61	-3.19	-3.61	-3.72259
266	34PentanePentane105	-3.61	-2.73	-3.17	-3.48	-3.56736
267	34PentanePentane110	-3.3	-2.65	-2.97	-3.2	-3.26495
268	34PentanePentane125	-2.24	-1.89	-1.7	-1.57	-2.21088
269	34PentanePentane150	-1.05	-1.01	-0.77	-0.59	-1.03869
270	34PentanePentane200	-0.27	-0.26	-0.25	-0.24	-0.262657
271	35NeopentanePentane090	-1.85	-0.6	-1.24	-1.71	-1.82214
272	35NeopentanePentane095	-2.49	-1.56	-1.91	-2.18	-2.46012
273	35NeopentanePentane100	-2.61	-1.92	-2.13	-2.28	-2.57959
274	35NeopentanePentane105	-2.48	-1.86	-2.13	-2.33	-2.45554
275	35NeopentanePentane110	-2.25	-1.78	-1.87	-1.94	-2.22804
276	35NeopentanePentane125	-1.5	-1.32	-1.28	-1.25	-1.47908
277	35NeopentanePentane150	-0.7	-0.66	-0.64	-0.63	-0.689927
278	35NeopentanePentane200	-0.18	-0.18	-0.17	-0.16	-0.184665
279	36NeopentaneNeopentane090	-1.45	-0.8	-1.35	-1.75	-1.42522
280	36NeopentaneNeopentane095	-1.74	-1.07	-1.73	-2.2	-1.70454
281	36NeopentaneNeopentane100	-1.77	-1.26	-0.74	-0.36	-1.74209
282	36NeopentaneNeopentane105	-1.68	-1.29	-1.41	-1.5	-1.62466
283	36NeopentaneNeopentane110	-1.54	-1.24	-1.54	-1.76	-1.5021
284	36NeopentaneNeopentane125	-1.05	-0.95	-0.83	-0.74	-1.01832
285	36NeopentaneNeopentane150	-0.5	-0.53	-0.48	-0.44	-0.497189
286	36NeopentaneNeopentane200	-0.14	-0.14	-0.13	-0.13	-0.13246
287	37CyclopentaneNeopentane090	-1.61	-0.25	-0.74	-1.1	-1.57585
288	37CyclopentaneNeopentane095	-2.25	-1.18	-1.7	-2.08	-2.21712
289	37CyclopentaneNeopentane100	-2.41	-1.57	-2.18	-2.62	-2.37278
290	37CyclopentaneNeopentane105	-2.33	-1.66	-2.22	-2.63	-2.29461
291	37CyclopentaneNeopentane110	-2.14	-1.63	-1.79	-1.91	-2.11081
292	37CyclopentaneNeopentane125	-1.47	-1.24	-1.28	-1.31	-1.44924
293	37CyclopentaneNeopentane150	-0.71	-0.68	-0.65	-0.62	-0.698891
294	37CyclopentaneNeopentane200	-0.19	-0.19	-0.18	-0.16	-0.188656
295	38CyclopentaneCyclopentane090	-2.24	-0.62	-1.7	-2.49	-2.19808
296	38CyclopentaneCyclopentane095	-2.84	-1.6	-2.21	-2.66	-2.80041
297	38CyclopentaneCyclopentane100	-3	-2.01	-2.23	-2.39	-2.95617
298	38CyclopentaneCyclopentane105	-2.86	-2.1	-2.52	-2.83	-2.82352
299	38CyclopentaneCyclopentane110	-2.6	-2.01	-2.32	-2.55	-2.56285
300	38CyclopentaneCyclopentane125	-1.71	-1.45	-1.28	-1.16	-1.69325
301	38CyclopentaneCyclopentane150	-0.79	-0.74	-0.73	-0.73	-0.780367
302	38CyclopentaneCyclopentane200	-0.2	-0.21	-0.21	-0.21	-0.200665
303	39BenzeneCyclopentane090	-2.16	0.08	-1.23	-2.18	-1.9687
304	39BenzeneCyclopentane095	-3.24	-1.47	-2.47	-3.21	-3.08098
305	39BenzeneCyclopentane100	-3.57	-2.22	-3	-3.58	-3.43781
306	39BenzeneCyclopentane105	-3.47	-2.45	-2.86	-3.17	-3.36393
307	39BenzeneCyclopentane110	-3.17	-2.4	-2.68	-2.88	-3.08312
308	39BenzeneCyclopentane125	-2.07	-1.75	-1.95	-2.09	-2.02564
309	39BenzeneCyclopentane150	-0.9	-0.83	-0.85	-0.86	-0.88369
310	39BenzeneCyclopentane200	-0.19	-0.18	-0.13	-0.09	-0.188667
311	40BenzeneNeopentane090	-1.86	-0.27	-1.13	-1.77	-1.7119
312	40BenzeneNeopentane095	-2.68	-1.45	-2.07	-2.52	-2.54891
313	40BenzeneNeopentane100	-2.89	-1.97	-2.7	-3.24	-2.79053
314	40BenzeneNeopentane105	-2.8	-2.11	-2.46	-2.71	-2.72088
315	40BenzeneNeopentane110	-2.57	-2.06	-2.31	-2.48	-2.5023
316	40BenzeneNeopentane125	-1.7	-1.38	-1.57	-1.72	-1.67429
317	40BenzeneNeopentane150	-0.77	-0.73	-0.73	-0.73	-0.762121
318	40BenzeneNeopentane200	-0.19	-0.18	-0.22	-0.25	-0.186544
319	41UracilPentane090	-3.83	-1.02	-2.86	-4.2	-3.67913
320	41UracilPentane095	-4.69	-2.44	-3.52	-4.31	-4.56038
321	41UracilPentane100	-4.84	-3.07	-3.86	-4.44	-4.72406
322	41UracilPentane105	-4.6	-3.21	-4.04	-4.64	-4.50168
323	41UracilPentane110	-4.08	-3.02	-3.39	-3.65	-3.99925
324	41UracilPentane125	-2.44	-2.05	-2.15	-2.23	-2.40241
325	41UracilPentane150	-0.98	-0.86	-0.7	-0.57	-0.961312
326	41UracilPentane200	-0.21	-0.19	-0.17	-0.16	-0.212103
327	42UracilCyclopentane090	-3.05	-0.61	-2.17	-3.31	-2.89976
328	42UracilCyclopentane095	-3.97	-1.98	-3.13	-3.96	-3.83639
329	42UracilCyclopentane100	-4.13	-2.58	-3.35	-3.9	-4.01859
330	42UracilCyclopentane105	-3.92	-2.59	-3.39	-3.98	-3.82252
331	42UracilCyclopentane110	-3.54	-2.52	-2.98	-3.32	-3.45872
332	42UracilCyclopentane125	-2.29	-1.8	-1.99	-2.13	-2.2488
333	42UracilCyclopentane150	-1.02	-0.87	-1.16	-1.36	-1.00044
334	42UracilCyclopentane200	-0.25	-0.22	-0.22	-0.22	-0.24558
335	43UracilNeopentane090	-2.87	-2.08	-2.2	-2.3	-2.75624
336	43UracilNeopentane095	-3.6	-2.12	-2.98	-3.61	-3.49966
337	43UracilNeopentane100	-3.7	-2.53	-3.17	-3.63	-3.61265
338	43UracilNeopentane105	-3.49	-2.61	-2.99	-3.27	-3.4152
339	43UracilNeopentane110	-3.15	-2.49	-2.76	-2.96	-3.0833
340	43UracilNeopentane125	-2.05	-1.73	-1.59	-1.49	-2.01329
341	43UracilNeopentane150	-0.92	-0.82	-0.88	-0.91	-0.912106
342	43UracilNeopentane200	-0.23	-0.22	-0.21	-0.2	-0.228658
343	44EthenePentane090	-1.66	-0.42	-0.86	-1.18	-1.59748
344	44EthenePentane095	-1.97	-0.95	-1.36	-1.65	-1.91823
345	44EthenePentane100	-1.99	-1.2	-1.65	-1.98	-1.94265
346	44EthenePentane105	-1.86	-1.25	-1.62	-1.89	-1.82187
347	44EthenePentane110	-1.67	-1.19	-1.21	-1.21	-1.63925
348	44EthenePentane125	-1.09	-0.86	-0.97	-1.05	-1.06878
349	44EthenePentane150	-0.49	-0.43	-0.49	-0.54	-0.481353
350	44EthenePentane200	-0.12	-0.1	-0.1	-0.1	-0.117369
351	45EthynePentane090	-1.13	0.28	-0.56	-1.17	-0.991646
352	45EthynePentane095	-1.63	-0.52	-1.22	-1.72	-1.50954
353	45EthynePentane100	-1.75	-0.87	-1.46	-1.88	-1.64553
354	45EthynePentane105	-1.68	-0.99	-1.33	-1.58	-1.5887
355	45EthynePentane110	-1.52	-0.98	-1.25	-1.44	-1.44438
356	45EthynePentane125	-0.98	-0.72	-0.83	-0.91	-0.932426
357	45EthynePentane150	-0.42	0.33	-0.37	-0.88	-0.400234
358	45EthynePentane200	-0.1	-0.08	-0.08	-0.07	-0.0916728
359	46PeptidePentane090	-3.75	-1.58	-2.64	-3.41	-3.65478
360	46PeptidePentane095	-4.21	-2.47	-3.28	-3.88	-4.115
361	46PeptidePentane100	-4.24	-2.85	-3.59	-4.13	-4.16179
362	46PeptidePentane105	-4.05	-2.88	-3.32	-3.63	-3.97387
363	46PeptidePentane110	-3.73	-2.8	-3.35	-3.76	-3.66489
364	46PeptidePentane125	-2.63	-2.1	-2.54	-2.85	-2.58551
365	46PeptidePentane150	-1.19	-1.03	-1.18	-1.28	-1.17157
366	46PeptidePentane200	-0.29	-0.26	-0.24	-0.23	-0.282057
367	47BenzeneBenzeneTS090	-1.64	0.16	-0.97	-1.78	-1.49324
368	47BenzeneBenzeneTS095	-2.58	-1.2	-2.03	-2.63	-2.45197
369	47BenzeneBenzeneTS100	-2.87	-1.81	-2.36	-2.77	-2.76169
370	47BenzeneBenzeneTS105	-2.82	-2	-2.41	-2.71	-2.73088
371	47BenzeneBenzeneTS110	-2.6	-1.98	-2.26	-2.46	-2.53572
372	47BenzeneBenzeneTS125	-1.77	-1.5	-1.57	-1.63	-1.73413
373	47BenzeneBenzeneTS150	-0.83	-0.77	-0.77	-0.77	-0.817747
374	47BenzeneBenzeneTS200	-0.22	-0.22	-0.35	-0.44	-0.222016
375	48PyridinePyridineTS090	-2.53	-0.73	-1.65	-2.31	-2.40152
376	48PyridinePyridineTS095	-3.31	-1.9	-2.83	-3.51	-3.19871
377	48PyridinePyridineTS100	-3.53	-2.43	-3.14	-3.66	-3.43979
378	48PyridinePyridineTS105	-3.45	-2.59	-3.02	-3.33	-3.37507
379	48PyridinePyridineTS110	-3.22	-2.55	-2.83	-3.03	-3.15369
380	48PyridinePyridineTS125	-2.29	-1.97	-2.16	-2.3	-2.25925
381	48PyridinePyridineTS150	-1.18	-1.11	-1.07	-1.03	-1.16835
382	48PyridinePyridineTS200	-0.37	0.23	-0.3	-0.69	-0.370157
383	49BenzenePyridineTS090	-2.09	-0.29	-1.39	-2.2	-1.94501
384	49BenzenePyridineTS095	-3.04	-1.66	-2.35	-2.85	-2.92164
385	49BenzenePyridineTS100	-3.32	-2.26	-2.8	-3.18	-3.2258
386	49BenzenePyridineTS105	-3.26	-2.44	-3.23	-3.8	-3.17573
387	49BenzenePyridineTS110	-3.02	-2.38	-2.68	-2.9	-2.95491
388	49BenzenePyridineTS125	-2.1	-1.82	-1.83	-1.84	-2.06781
389	49BenzenePyridineTS150	-1.05	-1	-0.99	-0.97	-1.04165
390	49BenzenePyridineTS200	-0.33	-0.32	-0.44	-0.53	-0.331789
391	50BenzeneEthyneCHpi090	-1.87	-0.37	-1.25	-1.89	-1.79084
392	50BenzeneEthyneCHpi095	-2.65	-1.4	-2.15	-2.7	-2.58043
393	50BenzeneEthyneCHpi100	-2.86	-1.89	-2.47	-2.89	-2.80969
394	50BenzeneEthyneCHpi105	-2.79	-2.04	-2.47	-2.79	-2.74707
395	50BenzeneEthyneCHpi110	-2.58	-1.99	-2.32	-2.57	-2.54513
396	50BenzeneEthyneCHpi125	-1.79	-1.54	-1.65	-1.72	-1.7721
397	50BenzeneEthyneCHpi150	-0.89	-0.85	-0.86	-0.86	-0.88985
398	50BenzeneEthyneCHpi200	-0.27	-0.29	-0.41	-0.5	-0.27212
399	51EthyneEthyneTS090	-1.21	-0.55	-0.85	-1.06	-1.16975
400	51EthyneEthyneTS095	-1.47	-0.88	-1.18	-1.41	-1.43404
401	51EthyneEthyneTS100	-1.52	-1.06	-1.29	-1.46	-1.48941
402	51EthyneEthyneTS105	-1.46	-1.08	-1.28	-1.42	-1.43134
403	51EthyneEthyneTS110	-1.35	-1.05	-1.2	-1.31	-1.31762
404	51EthyneEthyneTS125	-0.93	-0.79	-0.85	-0.9	-0.913488
405	51EthyneEthyneTS150	-0.46	-0.43	-0.43	-0.42	-0.4518
406	51EthyneEthyneTS200	-0.14	-0.14	-0.12	-0.11	-0.133953
407	52BenzeneAcOHOHpi090	-3.97	-2.02	-3.11	-3.89	-3.90822
408	52BenzeneAcOHOHpi095	-4.58	-2.96	-4.42	-5.48	-4.52526
409	52BenzeneAcOHOHpi100	-4.7	-3.37	-4.64	-5.56	-4.65525
410	52BenzeneAcOHOHpi105	-4.55	-3.43	-4.14	-4.65	-4.50756
411	52BenzeneAcOHOHpi110	-4.25	-3.32	-3.91	-4.34	-4.21346
412	52BenzeneAcOHOHpi125	-3.13	-2.58	-3.06	-3.41	-3.10667
413	52BenzeneAcOHOHpi150	-1.7	-1.48	-1.77	-1.98	-1.69725
414	52BenzeneAcOHOHpi200	-0.55	-0.5	-0.57	-0.62	-0.553786
415	53BenzeneAcNH2NHpi090	-3.79	-2.2	-3.38	-4.24	-3.7675
416	53BenzeneAcNH2NHpi095	-4.27	-2.92	-3.82	-4.47	-4.24208
417	53BenzeneAcNH2NHpi100	-4.36	-3.24	-3.73	-4.09	-4.33419
418	53BenzeneAcNH2NHpi105	-4.23	-3.3	-3.59	-3.8	-4.20138
419	53BenzeneAcNH2NHpi110	-3.97	-3.19	-3.37	-3.5	-3.94465
420	53BenzeneAcNH2NHpi125	-2.97	-2.53	-2.8	-3	-2.95996
421	53BenzeneAcNH2NHpi150	-1.65	-1.48	-1.59	-1.67	-1.64141
422	53BenzeneAcNH2NHpi200	-0.48	-0.46	-0.32	-0.22	-0.480903
423	54BenzeneWaterOHpi090	-2.8	-1.49	-2.29	-2.88	-2.74512
424	54BenzeneWaterOHpi095	-3.21	-2.15	-2.72	-3.14	-3.16118
425	54BenzeneWaterOHpi100	-3.27	-2.4	-2.81	-3.11	-3.22366
426	54BenzeneWaterOHpi105	-3.13	-2.43	-2.77	-3.01	-3.09425
427	54BenzeneWaterOHpi110	-2.9	-2.33	-2.59	-2.78	-2.87037
428	54BenzeneWaterOHpi125	-2.1	-1.74	-1.92	-2.05	-2.08886
429	54BenzeneWaterOHpi150	-1.16	-1.02	-1.11	-1.17	-1.15401
430	54BenzeneWaterOHpi200	-0.42	-0.39	-0.75	-1.01	-0.417078
431	55BenzeneMeOHOHpi090	-3.45	-1.47	-2.72	-3.64	-3.338
432	55BenzeneMeOHOHpi095	-4.05	-2.42	-3.45	-4.19	-3.9499
433	55BenzeneMeOHOHpi100	-4.19	-2.85	-3.63	-4.19	-4.10581
434	55BenzeneMeOHOHpi105	-4.07	-2.94	-3.59	-4.08	-3.9982
435	55BenzeneMeOHOHpi110	-3.8	-2.91	-3.41	-3.77	-3.74932
436	55BenzeneMeOHOHpi125	-2.8	-2.29	-2.73	-3.05	-2.77441
437	55BenzeneMeOHOHpi150	-1.53	-1.34	-1.41	-1.45	-1.52391
438	55BenzeneMeOHOHpi200	-0.52	-0.47	-0.5	-0.51	-0.518123
439	56BenzeneMeNH2NHpi090	-2.51	-0.7	-1.89	-2.76	-2.38091
440	56BenzeneMeNH2NHpi095	-3.09	-1.66	-2.49	-3.09	-2.97661
441	56BenzeneMeNH2NHpi100	-3.23	-2.07	-2.68	-3.12	-3.13876
442	56BenzeneMeNH2NHpi105	-3.12	-2.21	-2.66	-2.99	-3.04387
443	56BenzeneMeNH2NHpi110	-2.86	-2.15	-2.49	-2.73	-2.80285
444	56BenzeneMeNH2NHpi125	-1.95	-1.61	-1.73	-1.82	-1.92243
445	56BenzeneMeNH2NHpi150	-0.94	-0.83	-0.86	-0.87	-0.93271
446	56BenzeneMeNH2NHpi200	-0.26	-0.24	-0.59	-0.84	-0.260262
447	57BenzenePeptideNHpi090	-3.75	-1.35	-2.71	-3.71	-3.59468
448	57BenzenePeptideNHpi095	-4.96	-3.09	-4.05	-4.74	-4.82807
449	57BenzenePeptideNHpi100	-5.28	-3.82	-4.89	-5.67	-5.17609
450	57BenzenePeptideNHpi105	-5.14	-3.94	-4.79	-5.42	-5.0589
451	57BenzenePeptideNHpi110	-4.78	-3.82	-4.52	-5.02	-4.71472
452	57BenzenePeptideNHpi125	-3.41	-2.94	-3.44	-3.8	-3.38389
453	57BenzenePeptideNHpi150	-1.8	-1.64	-1.73	-1.8	-1.79943
454	57BenzenePeptideNHpi200	-0.62	-0.59	-0.51	-0.46	-0.619431
455	58PyridinePyridineCHN090	-2.8	-1.71	-2.18	-2.52	-2.88416
456	58PyridinePyridineCHN095	-3.82	-2.99	-3.14	-3.24	-3.86933
457	58PyridinePyridineCHN100	-4.15	-3.59	-3.92	-4.16	-4.16646
458	58PyridinePyridineCHN105	-3.89	-3.51	-3.76	-3.94	-3.88977
459	58PyridinePyridineCHN110	-3.45	-3.19	-3.7	-4.07	-3.44199
460	58PyridinePyridineCHN125	-2.18	-2.11	-2.08	-2.05	-2.17336
461	58PyridinePyridineCHN150	-1.01	-1.02	-1.01	-1	-1.00513
462	58PyridinePyridineCHN200	-0.28	-0.25	-0.3	-0.34	-0.274043
463	59EthyneWaterCHO090	-2.52	-1.81	-2.19	-2.46	-2.60366
464	59EthyneWaterCHO095	-2.8	-2.23	-2.49	-2.68	-2.86494
465	59EthyneWaterCHO100	-2.85	-2.39	-2.58	-2.71	-2.89872
466	59EthyneWaterCHO105	-2.76	-2.39	-2.53	-2.64	-2.79927
467	59EthyneWaterCHO110	-2.6	-2.31	-2.41	-2.49	-2.62788
468	59EthyneWaterCHO125	-1.98	-1.82	-1.88	-1.92	-1.99931
469	59EthyneWaterCHO150	-1.17	-1.14	-1.12	-1.11	-1.17815
470	59EthyneWaterCHO200	-0.46	-0.47	-0.45	-0.43	-0.461297
471	60EthyneAcOHOHpi090	-4.28	-2.76	-3.39	-3.86	-4.30609
472	60EthyneAcOHOHpi095	-4.78	-3.47	-4.01	-4.41	-4.7866
473	60EthyneAcOHOHpi100	-4.86	-3.75	-4.37	-4.83	-4.85415
474	60EthyneAcOHOHpi105	-4.69	-3.75	-4.3	-4.7	-4.67874
475	60EthyneAcOHOHpi110	-4.39	-3.58	-4.05	-4.4	-4.37113
476	60EthyneAcOHOHpi125	-3.26	-2.75	-3.05	-3.28	-3.23436
477	60EthyneAcOHOHpi150	-1.77	-1.54	-1.65	-1.72	-1.76008
478	60EthyneAcOHOHpi200	-0.56	-0.51	-0.51	-0.51	-0.555852
479	61PentaneAcOH090	-2.7	-1.25	-1.89	-2.35	-2.62929
480	61PentaneAcOH095	-2.9	-1.72	-2.24	-2.61	-2.83503
481	61PentaneAcOH100	-2.88	-1.92	-2.3	-2.58	-2.8197
482	61PentaneAcOH105	-2.73	-1.91	-2.44	-2.83	-2.67689
483	61PentaneAcOH110	-2.52	-1.85	-2.1	-2.28	-2.46742
484	61PentaneAcOH125	-1.79	-1.4	-1.56	-1.68	-1.75749
485	61PentaneAcOH150	-0.78	-0.67	-0.68	-0.69	-0.772646
486	61PentaneAcOH200	-0.17	-0.15	-0.15	-0.14	-0.165994
487	62PentaneAcNH2090	-3.15	-1.05	-2.33	-3.26	-3.07359
488	62PentaneAcNH2095	-3.5	-2.02	-2.58	-2.99	-3.42638
489	62PentaneAcNH2100	-3.51	-2.27	-2.74	-3.09	-3.43722
490	62PentaneAcNH2105	-3.32	-2.32	-2.91	-3.34	-3.25919
491	62PentaneAcNH2110	-3.04	-2.24	-2.53	-2.75	-2.98775
492	62PentaneAcNH2125	-2.12	-1.69	-2.01	-2.24	-2.07844
493	62PentaneAcNH2150	-1.04	-0.9	-0.95	-0.99	-1.02451
494	62PentaneAcNH2200	-0.27	-0.25	-0.25	-0.25	-0.268049
495	63BenzeneAcOH090	-2.73	-0.57	-1.82	-2.74	-2.54659
496	63BenzeneAcOH095	-3.6	-1.81	-2.78	-3.49	-3.44386
497	63BenzeneAcOH100	-3.8	-2.42	-3.43	-4.16	-3.67136
498	63BenzeneAcOH105	-3.65	-2.58	-3.1	-3.49	-3.54622
499	63BenzeneAcOH110	-3.34	-2.5	-2.91	-3.2	-3.25335
500	63BenzeneAcOH125	-2.24	-1.8	-1.98	-2.1	-2.19512
501	63BenzeneAcOH150	-1.02	-0.89	-0.95	-0.99	-1.00733
502	63BenzeneAcOH200	-0.26	-0.25	-0.18	-0.12	-0.258702
503	64PeptideEthene090	-2.6	-1.04	-1.88	-2.49	-2.52687
504	64PeptideEthene095	-2.95	-1.68	-2.35	-2.84	-2.88149
505	64PeptideEthene100	-2.99	-1.95	-2.71	-3.27	-2.9279
506	64PeptideEthene105	-2.85	-2.01	-2.45	-2.77	-2.80104
507	64PeptideEthene110	-2.63	-1.94	-2.29	-2.54	-2.58541
508	64PeptideEthene125	-1.86	-1.49	-1.64	-1.75	-1.8281
509	64PeptideEthene150	-0.88	-0.76	-0.79	-0.81	-0.866895
510	64PeptideEthene200	-0.19	-0.13	-0.17	-0.2	-0.187642
511	65PyridineEthyne090	-3.54	-2.8	-3.22	-3.52	-3.66054
512	65PyridineEthyne095	-3.91	-3.31	-3.61	-3.83	-4.00764
513	65PyridineEthyne100	-3.99	-3.51	-3.73	-3.88	-4.06567
514	65PyridineEthyne105	-3.89	-3.51	-3.66	-3.77	-3.94577
515	65PyridineEthyne110	-3.68	-3.37	-3.49	-3.57	-3.72406
516	65PyridineEthyne125	-2.84	-2.7	-2.72	-2.74	-2.8661
517	65PyridineEthyne150	-1.67	-1.66	-1.7	-1.73	-1.67923
518	65PyridineEthyne200	-0.62	-0.64	-0.65	-0.66	-0.618433
519	66MeNH2Pyridine090	-3.45	-1.75	-2.66	-3.32	-3.35962
520	66MeNH2Pyridine095	-3.88	-2.49	-3.21	-3.73	-3.79562
521	66MeNH2Pyridine100	-3.97	-2.84	-3.43	-3.86	-3.89254
522	66MeNH2Pyridine105	-3.85	-2.93	-3.42	-3.78	-3.78432
523	66MeNH2Pyridine110	-3.62	-2.87	-3.18	-3.41	-3.56039
524	66MeNH2Pyridine125	-2.71	-2.31	-2.44	-2.54	-2.67699
525	66MeNH2Pyridine150	-1.5	-1.34	-1.6	-1.8	-1.4875
526	66MeNH2Pyridine200	-0.49	-0.47	-0.39	-0.33	-0.490416
527
