# Supplementary material for: S66x8 noncovalent interactions revisited: new benchmark and performance of composite localized coupled-cluster methods
Source: Royal Society of Chemistry journal article supplement (doi:10.1039/d2cp03938a), 2022-01-01
Supplement: d2cp03938a1.zip [file S66x8 STERLING SILVER and Hesselmann SAPT(DFT).xlsx]

## Sheet: MP2-F12 
								MP2-F12	VQZ-F12																							SCS-MP2-F12/VQZ-F12
									raw	CP	half																					raw	CP	half
	4.07527							MSD all	0.30764	0.279185	0.293413																				MSD all	-0.527507	-0.554913	-0.54121
	7.01118							H-bonds	-0.0360538	-0.0653619	-0.0507078																				H-bonds	-0.718022	-0.746134	-0.732078
	2.79977							pi stacks	1.13999	1.09741	1.1187																				pi stacks	-0.219171	-0.2603	-0.239736
	2.1465							London	0.238784	0.216461	0.227622																				London	-0.687149	-0.708695	-0.697922
	2.59044							mixed	0.33147	0.307073	0.319271																				mixed	-0.358816	-0.382358	-0.370587
	5.66161							RMSD all	0.697901	0.67798	0.687783																				RMSD all	0.753309	0.781979	0.767587
	8.66969							H-bonds	0.172996	0.195387	0.183656																				H-bonds	0.949804	0.983605	0.966699
	3.68733							pi stacks	1.5579	1.51486	1.53631																				pi stacks	0.508613	0.54499	0.526525
	2.50398							London	0.40858	0.38568	0.397022																				London	0.868674	0.892465	0.880536
	2.90959							mixed	0.500862	0.478411	0.489564																				mixed	0.4641	0.488969	0.476504
																				MP2-F12					updated Beta = 1.0
									MP2-F12	VQZ-F12				MP2-F12	VTZ-F12					VTZ-F12												SCS-MP2-F12/VQZ-F12							HF+CABS/VQZ-F12						HF+CABS/VTZ-F12
			updated Beta =1.0																						SCS-MP2-F12/VQZ-F12
			MP2-F12	VQZ-F12					0.03561	0.0327321	0.00764735
	Reference		Dimer	cpA	cpB	monomerA	monomerB		raw	CP	half	raw-CP=BSSE		Dimer	cpA	cpB	monomerA	monomerB		raw	CP	half	raw-CP=BSSE			Dimer	cpA	cpB	monomerA	monomerB		raw	CP	half	raw-CP=BSSE				Dimer	cpA	cpB	monomerA	monomerB			Dimer	cpA	cpB	monomerA
01_Water-Water_0.90	4.65882	01_Water-Water_0.90	-152.742	-76.3675	-76.3675	-76.3674	-76.3675		4.69785	4.66633	4.68209	0.0315215		-152.738	-76.3654	-76.3655	-76.3654	-76.3654		4.7233	4.64633	4.68482	0.0769688		01_Water-Water_0.90	-152.743	-76.3684	-76.3685	-76.3684	-76.3685		4.10676	4.07581	4.09129	0.0309507			01_Water-Water_0.90	-152.139	-76.0669	-76.0671	-76.0669	-76.0671		01_Water-Water_0.90.out:	-152.137	-76.0659	-76.0661	-76.0658
01_Water-Water_0.95	4.95377	01_Water-Water_0.95	-152.743	-76.3675	-76.3675	-76.3674	-76.3675		4.96728	4.93801	4.95264	0.0292647		-152.739	-76.3654	-76.3655	-76.3654	-76.3654		4.99203	4.92233	4.95718	0.0696961		01_Water-Water_0.95	-152.744	-76.3684	-76.3685	-76.3684	-76.3685		4.48131	4.45262	4.46696	0.0286833			01_Water-Water_0.95	-152.14	-76.0669	-76.0671	-76.0669	-76.0671		01_Water-Water_0.95.out:	-152.137	-76.0659	-76.0661	-76.0658
01_Water-Water_1.00	4.95065	01_Water-Water_1.00	-152.743	-76.3675	-76.3675	-76.3674	-76.3675		4.95002	4.9229	4.93646	0.0271249		-152.739	-76.3654	-76.3655	-76.3654	-76.3654		4.97349	4.91039	4.94194	0.0630986		01_Water-Water_1.00	-152.744	-76.3684	-76.3685	-76.3684	-76.3685		4.55029	4.52376	4.53702	0.0265386			01_Water-Water_1.00	-152.14	-76.0669	-76.0671	-76.0669	-76.0671		01_Water-Water_1.00.out:	-152.138	-76.0659	-76.0661	-76.0658
01_Water-Water_1.05	4.76839	01_Water-Water_1.05	-152.743	-76.3675	-76.3675	-76.3674	-76.3675		4.76171	4.73664	4.74917	0.025074		-152.738	-76.3654	-76.3655	-76.3654	-76.3654		4.78366	4.7265	4.75508	0.0571655		01_Water-Water_1.05	-152.744	-76.3684	-76.3685	-76.3684	-76.3685		4.43274	4.40825	4.4205	0.024486			01_Water-Water_1.05	-152.14	-76.0669	-76.0671	-76.0669	-76.0671		01_Water-Water_1.05.out:	-152.138	-76.0659	-76.0661	-76.0658
01_Water-Water_1.10	4.48656	01_Water-Water_1.10	-152.742	-76.3674	-76.3675	-76.3674	-76.3675		4.47909	4.45597	4.46753	0.0231186		-152.738	-76.3654	-76.3655	-76.3654	-76.3654		4.49944	4.44758	4.47351	0.0518666		01_Water-Water_1.10	-152.744	-76.3684	-76.3685	-76.3684	-76.3685		4.20785	4.18532	4.19658	0.0225321			01_Water-Water_1.10	-152.14	-76.0669	-76.0671	-76.0669	-76.0671		01_Water-Water_1.10.out:	-152.138	-76.0659	-76.0661	-76.0658
01_Water-Water_1.25	3.47347	01_Water-Water_1.25	-152.74	-76.3674	-76.3675	-76.3674	-76.3675		3.47583	3.45804	3.46694	0.0177954		-152.736	-76.3654	-76.3655	-76.3654	-76.3654		3.4913	3.45271	3.472	0.0385922		01_Water-Water_1.25	-152.742	-76.3684	-76.3685	-76.3684	-76.3685		3.32155	3.30431	3.31293	0.0172419			01_Water-Water_1.25	-152.139	-76.0669	-76.0671	-76.0669	-76.0671		01_Water-Water_1.25.out:	-152.137	-76.0659	-76.0661	-76.0658
01_Water-Water_1.50	2.11314	01_Water-Water_1.50	-152.738	-76.3674	-76.3675	-76.3674	-76.3675		2.12899	2.1184	2.12369	0.0105858		-152.734	-76.3654	-76.3654	-76.3654	-76.3654		2.13912	2.11542	2.12727	0.0236997		01_Water-Water_1.50	-152.74	-76.3684	-76.3685	-76.3684	-76.3685		2.06476	2.0546	2.05968	0.0101692			01_Water-Water_1.50	-152.137	-76.0669	-76.0671	-76.0669	-76.0671		01_Water-Water_1.50.out:	-152.135	-76.0659	-76.0661	-76.0658
01_Water-Water_2.00	0.871683	01_Water-Water_2.00	-152.736	-76.3674	-76.3675	-76.3674	-76.3675		0.885901	0.882546	0.884224	0.00335457		-152.732	-76.3654	-76.3654	-76.3654	-76.3654		0.891717	0.881209	0.886463	0.0105077		01_Water-Water_2.00	-152.738	-76.3684	-76.3685	-76.3684	-76.3685		0.871445	0.868255	0.86985	0.00318925			01_Water-Water_2.00	-152.135	-76.0669	-76.0671	-76.0669	-76.0671		01_Water-Water_2.00.out:	-152.133	-76.0658	-76.066	-76.0658
02_Water-MeOH_0.90	5.29278	02_Water-MeOH_0.90	-191.962	-76.3674	-115.586	-76.3674	-115.586		5.41157	5.38026	5.39591	0.0313117		-191.958	-76.3654	-115.584	-76.3654	-115.584		5.43819	5.35137	5.39478	0.086822		02_Water-MeOH_0.90	-191.969	-76.3684	-115.593	-76.3684	-115.593		4.63086	4.60037	4.61561	0.0304929			02_Water-MeOH_0.90	-191.173	-76.0669	-115.101	-76.0669	-115.101		02_Water-MeOH_0.90.out:	-191.17	-76.0658	-115.1	-76.0658
02_Water-MeOH_0.95	5.63046	02_Water-MeOH_0.95	-191.963	-76.3674	-115.586	-76.3674	-115.586		5.70665	5.67786	5.69226	0.0287935		-191.958	-76.3654	-115.584	-76.3654	-115.584		5.73244	5.65416	5.6933	0.0782804		02_Water-MeOH_0.95	-191.969	-76.3684	-115.593	-76.3684	-115.593		5.05472	5.02672	5.04072	0.0279967			02_Water-MeOH_0.95	-191.174	-76.0669	-115.101	-76.0669	-115.101		02_Water-MeOH_0.95.out:	-191.171	-76.0658	-115.1	-76.0658
02_Water-MeOH_1.00	5.63423	02_Water-MeOH_1.00	-191.963	-76.3674	-115.586	-76.3674	-115.586		5.68167	5.65522	5.66845	0.0264509		-191.958	-76.3654	-115.584	-76.3654	-115.584		5.70564	5.63528	5.67046	0.0703596		02_Water-MeOH_1.00	-191.969	-76.3684	-115.593	-76.3684	-115.593		5.13733	5.11165	5.12449	0.0256818			02_Water-MeOH_1.00	-191.174	-76.0669	-115.101	-76.0669	-115.101		02_Water-MeOH_1.00.out:	-191.172	-76.0658	-115.1	-76.0658
02_Water-MeOH_1.05	5.43386	02_Water-MeOH_1.05	-191.962	-76.3674	-115.586	-76.3674	-115.586		5.46337	5.43913	5.45125	0.0242444		-191.958	-76.3654	-115.584	-76.3654	-115.584		5.4855	5.42237	5.45394	0.0631324		02_Water-MeOH_1.05	-191.969	-76.3684	-115.593	-76.3684	-115.593		5.00881	4.98531	4.99706	0.0235027			02_Water-MeOH_1.05	-191.175	-76.0669	-115.101	-76.0669	-115.101		02_Water-MeOH_1.05.out:	-191.172	-76.0658	-115.1	-76.0658
02_Water-MeOH_1.10	5.11853	02_Water-MeOH_1.10	-191.962	-76.3674	-115.586	-76.3674	-115.586		5.13772	5.11555	5.12664	0.0221739		-191.957	-76.3654	-115.584	-76.3654	-115.584		5.15773	5.10105	5.12939	0.0566812		02_Water-MeOH_1.10	-191.969	-76.3684	-115.593	-76.3684	-115.593		4.75761	4.73615	4.74688	0.0214576			02_Water-MeOH_1.10	-191.174	-76.0669	-115.101	-76.0669	-115.101		02_Water-MeOH_1.10.out:	-191.172	-76.0658	-115.1	-76.0658
02_Water-MeOH_1.25	3.96658	02_Water-MeOH_1.25	-191.96	-76.3674	-115.586	-76.3674	-115.586		3.97875	3.96196	3.97035	0.0167897		-191.955	-76.3654	-115.584	-76.3654	-115.584		3.99249	3.95151	3.972	0.0409783		02_Water-MeOH_1.25	-191.967	-76.3684	-115.593	-76.3684	-115.593		3.75376	3.73761	3.74569	0.0161503			02_Water-MeOH_1.25	-191.173	-76.0669	-115.101	-76.0669	-115.101		02_Water-MeOH_1.25.out:	-191.171	-76.0658	-115.1	-76.0658
02_Water-MeOH_1.50	2.39407	02_Water-MeOH_1.50	-191.958	-76.3674	-115.586	-76.3674	-115.586		2.41251	2.40246	2.40749	0.0100533		-191.953	-76.3654	-115.584	-76.3654	-115.584		2.41964	2.39617	2.40791	0.023473		02_Water-MeOH_1.50	-191.965	-76.3684	-115.593	-76.3684	-115.593		2.31334	2.30376	2.30855	0.00958613			02_Water-MeOH_1.50	-191.172	-76.0669	-115.101	-76.0669	-115.101		02_Water-MeOH_1.50.out:	-191.169	-76.0658	-115.1	-76.0658
02_Water-MeOH_2.00	0.954668	02_Water-MeOH_2.00	-191.955	-76.3674	-115.586	-76.3674	-115.586		0.969533	0.966567	0.96805	0.00296579		-191.951	-76.3654	-115.584	-76.3654	-115.584		0.972745	0.964393	0.968569	0.00835223		02_Water-MeOH_2.00	-191.963	-76.3684	-115.593	-76.3684	-115.593		0.945486	0.942667	0.944076	0.00281892			02_Water-MeOH_2.00	-191.17	-76.0669	-115.101	-76.0669	-115.101		02_Water-MeOH_2.00.out:	-191.167	-76.0658	-115.1	-76.0658
03_Water-MeNH2_0.90	6.57684	03_Water-MeNH2_0.90	-172.093	-76.3673	-95.715	-76.3673	-95.715		6.81228	6.78572	6.799	0.0265604		-172.089	-76.3653	-95.7132	-76.3653	-95.7131		6.83395	6.75633	6.79514	0.0776169		03_Water-MeNH2_0.90	-172.102	-76.3683	-95.7246	-76.3683	-95.7246		5.92617	5.90004	5.9131	0.0261265			03_Water-MeNH2_0.90	-171.335	-76.0666	-95.2629	-76.0666	-95.2629		03_Water-MeNH2_0.90.out:	-171.333	-76.0655	-95.2618	-76.0655
03_Water-MeNH2_0.95	6.93748	03_Water-MeNH2_0.95	-172.094	-76.3673	-95.715	-76.3673	-95.715		7.10589	7.08141	7.09365	0.0244783		-172.09	-76.3653	-95.7132	-76.3653	-95.7131		7.12708	7.05705	7.09207	0.0700377		03_Water-MeNH2_0.95	-172.103	-76.3683	-95.7246	-76.3683	-95.7246		6.36032	6.33629	6.3483	0.0240315			03_Water-MeNH2_0.95	-171.336	-76.0666	-95.2629	-76.0666	-95.2629		03_Water-MeNH2_0.95.out:	-171.334	-76.0655	-95.2618	-76.0655
03_Water-MeNH2_1.00	6.9286	03_Water-MeNH2_1.00	-172.094	-76.3673	-95.715	-76.3673	-95.715		7.0483	7.0257	7.037	0.022598		-172.09	-76.3653	-95.7132	-76.3653	-95.7131		7.06841	7.00542	7.03691	0.0629869		03_Water-MeNH2_1.00	-172.103	-76.3683	-95.7246	-76.3683	-95.7246		6.42161	6.39947	6.41054	0.0221388			03_Water-MeNH2_1.00	-171.337	-76.0666	-95.2629	-76.0666	-95.2629		03_Water-MeNH2_1.00.out:	-171.335	-76.0655	-95.2618	-76.0655
03_Water-MeNH2_1.05	6.68924	03_Water-MeNH2_1.05	-172.093	-76.3673	-95.715	-76.3673	-95.715		6.77465	6.75378	6.76422	0.0208712		-172.089	-76.3653	-95.7132	-76.3653	-95.7131		6.79326	6.73678	6.76502	0.0564783		03_Water-MeNH2_1.05	-172.103	-76.3683	-95.7246	-76.3683	-95.7246		6.24828	6.22788	6.23808	0.0203983			03_Water-MeNH2_1.05	-171.337	-76.0666	-95.2629	-76.0666	-95.2629		03_Water-MeNH2_1.05.out:	-171.335	-76.0655	-95.2618	-76.0655
03_Water-MeNH2_1.10	6.31548	03_Water-MeNH2_1.10	-172.093	-76.3673	-95.715	-76.3673	-95.715		6.37762	6.35836	6.36799	0.0192666		-172.089	-76.3653	-95.7131	-76.3653	-95.7131		6.39452	6.34396	6.36924	0.0505571		03_Water-MeNH2_1.10	-172.102	-76.3683	-95.7246	-76.3683	-95.7246		5.93531	5.91653	5.92592	0.0187795			03_Water-MeNH2_1.10	-171.337	-76.0666	-95.2629	-76.0666	-95.2629		03_Water-MeNH2_1.10.out:	-171.335	-76.0655	-95.2618	-76.0655
03_Water-MeNH2_1.25	4.93163	03_Water-MeNH2_1.25	-172.09	-76.3673	-95.715	-76.3673	-95.715		4.96276	4.94768	4.95522	0.0150711		-172.086	-76.3653	-95.7131	-76.3653	-95.7131		4.97448	4.93827	4.95638	0.0362033		03_Water-MeNH2_1.25	-172.1	-76.3683	-95.7246	-76.3683	-95.7246		4.69846	4.6839	4.69118	0.0145581			03_Water-MeNH2_1.25	-171.336	-76.0666	-95.2629	-76.0666	-95.2629		03_Water-MeNH2_1.25.out:	-171.334	-76.0655	-95.2618	-76.0655
03_Water-MeNH2_1.50	2.9817	03_Water-MeNH2_1.50	-172.087	-76.3673	-95.715	-76.3673	-95.715		3.00649	2.99673	3.00161	0.00976233		-172.083	-76.3653	-95.7131	-76.3653	-95.7131		3.01376	2.9915	3.00263	0.0222673		03_Water-MeNH2_1.50	-172.097	-76.3683	-95.7246	-76.3683	-95.7246		2.88927	2.87999	2.88463	0.00927956			03_Water-MeNH2_1.50	-171.334	-76.0666	-95.2629	-76.0666	-95.2629		03_Water-MeNH2_1.50.out:	-171.331	-76.0655	-95.2618	-76.0655
03_Water-MeNH2_2.00	1.14331	03_Water-MeNH2_2.00	-172.084	-76.3673	-95.715	-76.3673	-95.715		1.16394	1.15972	1.16183	0.00421742		-172.08	-76.3653	-95.7131	-76.3653	-95.7131		1.16901	1.15829	1.16365	0.010724		03_Water-MeNH2_2.00	-172.095	-76.3683	-95.7246	-76.3683	-95.7246		1.13507	1.13117	1.13312	0.0038992			03_Water-MeNH2_2.00	-171.331	-76.0666	-95.2629	-76.0666	-95.2629		03_Water-MeNH2_2.00.out:	-171.329	-76.0655	-95.2618	-76.0655
04_Water-Peptide_0.90	7.74844	04_Water-Peptide_0.90	-324.57	-76.3674	-248.19	-76.3674	-248.19		7.72334	7.68136	7.70235	0.0419745		-324.563	-76.3654	-248.185	-76.3653	-248.185		7.75568	7.64663	7.70116	0.109048		04_Water-Peptide_0.90	-324.573	-76.3684	-248.194	-76.3683	-248.194		6.70783	6.66748	6.68766	0.0403454			04_Water-Peptide_0.90	-323.196	-76.0667	-247.122	-76.0666	-247.122		04_Water-Peptide_0.90.out:	-323.192	-76.0656	-247.119	-76.0656
04_Water-Peptide_0.95	8.14892	04_Water-Peptide_0.95	-324.57	-76.3674	-248.19	-76.3674	-248.19		8.08959	8.05054	8.07007	0.039057		-324.563	-76.3654	-248.185	-76.3653	-248.185		8.12135	8.02134	8.07135	0.100002		04_Water-Peptide_0.95	-324.574	-76.3684	-248.194	-76.3683	-248.194		7.22055	7.18311	7.20183	0.0374448			04_Water-Peptide_0.95	-323.197	-76.0667	-247.122	-76.0666	-247.122		04_Water-Peptide_0.95.out:	-323.193	-76.0656	-247.119	-76.0656
04_Water-Peptide_1.00	8.153	04_Water-Peptide_1.00	-324.57	-76.3674	-248.19	-76.3674	-248.19		8.07199	8.0357	8.05384	0.036288		-324.563	-76.3654	-248.185	-76.3653	-248.185		8.10189	8.01069	8.05629	0.0911949		04_Water-Peptide_1.00	-324.574	-76.3684	-248.194	-76.3683	-248.194		7.32836	7.29365	7.31101	0.0347085			04_Water-Peptide_1.00	-323.198	-76.0667	-247.122	-76.0666	-247.122		04_Water-Peptide_1.00.out:	-323.194	-76.0656	-247.119	-76.0656
04_Water-Peptide_1.05	7.90748	04_Water-Peptide_1.05	-324.57	-76.3674	-248.19	-76.3674	-248.19		7.81488	7.78126	7.79807	0.0336165		-324.563	-76.3654	-248.185	-76.3653	-248.185		7.84216	7.75941	7.80079	0.0827523		04_Water-Peptide_1.05	-324.574	-76.3684	-248.194	-76.3683	-248.194		7.17852	7.14644	7.16248	0.0320816			04_Water-Peptide_1.05	-323.198	-76.0667	-247.122	-76.0666	-247.122		04_Water-Peptide_1.05.out:	-323.194	-76.0656	-247.119	-76.0656
04_Water-Peptide_1.10	7.51416	04_Water-Peptide_1.10	-324.569	-76.3674	-248.19	-76.3674	-248.19		7.41755	7.3865	7.40202	0.0310487		-324.562	-76.3654	-248.185	-76.3653	-248.185		7.44192	7.36699	7.40446	0.0749236		04_Water-Peptide_1.10	-324.574	-76.3684	-248.194	-76.3683	-248.194		6.87237	6.8428	6.85759	0.0295682			04_Water-Peptide_1.10	-323.198	-76.0667	-247.122	-76.0666	-247.122		04_Water-Peptide_1.10.out:	-323.194	-76.0656	-247.119	-76.0656
04_Water-Peptide_1.25	6.02344	04_Water-Peptide_1.25	-324.567	-76.3674	-248.19	-76.3674	-248.19		5.93907	5.91498	5.92702	0.0240898		-324.56	-76.3653	-248.185	-76.3653	-248.185		5.95467	5.89948	5.92708	0.0551839		04_Water-Peptide_1.25	-324.571	-76.3684	-248.194	-76.3683	-248.194		5.59346	5.57064	5.58205	0.0228206			04_Water-Peptide_1.25	-323.196	-76.0667	-247.122	-76.0666	-247.122		04_Water-Peptide_1.25.out:	-323.192	-76.0656	-247.119	-76.0656
04_Water-Peptide_1.50	3.84403	04_Water-Peptide_1.50	-324.564	-76.3674	-248.19	-76.3674	-248.19		3.79614	3.78154	3.78884	0.014606		-324.556	-76.3653	-248.185	-76.3653	-248.185		3.80274	3.7702	3.78647	0.0325403		04_Water-Peptide_1.50	-324.568	-76.3684	-248.194	-76.3683	-248.194		3.62888	3.61512	3.622	0.0137623			04_Water-Peptide_1.50	-323.194	-76.0667	-247.122	-76.0666	-247.122		04_Water-Peptide_1.50.out:	-323.19	-76.0656	-247.119	-76.0656
04_Water-Peptide_2.00	1.44228	04_Water-Peptide_2.00	-324.56	-76.3674	-248.19	-76.3674	-248.19		1.42783	1.42427	1.42605	0.00355559		-324.553	-76.3653	-248.185	-76.3653	-248.185		1.43038	1.42024	1.42531	0.0101454		04_Water-Peptide_2.00	-324.565	-76.3684	-248.194	-76.3683	-248.194		1.39239	1.38899	1.39069	0.0033975			04_Water-Peptide_2.00	-323.19	-76.0667	-247.122	-76.0666	-247.122		04_Water-Peptide_2.00.out:	-323.187	-76.0656	-247.119	-76.0656
05_MeOH-MeOH_0.90	5.39588	05_MeOH-MeOH_0.90	-231.181	-115.586	-115.586	-115.586	-115.586		5.49209	5.46233	5.47721	0.0297525		-231.176	-115.584	-115.584	-115.583	-115.584		5.51374	5.43129	5.47251	0.0824516		05_MeOH-MeOH_0.90	-231.193	-115.593	-115.593	-115.593	-115.593		4.58052	4.55165	4.56608	0.0288744			05_MeOH-MeOH_0.90	-230.206	-115.101	-115.101	-115.101	-115.101		05_MeOH-MeOH_0.90.out:	-230.204	-115.1	-115.1	-115.1
05_MeOH-MeOH_0.95	5.78687	05_MeOH-MeOH_0.95	-231.182	-115.586	-115.586	-115.586	-115.586		5.83606	5.80853	5.8223	0.0275309		-231.176	-115.584	-115.584	-115.583	-115.584		5.85701	5.78257	5.81979	0.0744361		05_MeOH-MeOH_0.95	-231.194	-115.593	-115.593	-115.593	-115.593		5.07088	5.04423	5.05755	0.0266507			05_MeOH-MeOH_0.95	-230.208	-115.101	-115.101	-115.101	-115.101		05_MeOH-MeOH_0.95.out:	-230.205	-115.1	-115.1	-115.1
05_MeOH-MeOH_1.00	5.82437	05_MeOH-MeOH_1.00	-231.182	-115.586	-115.586	-115.586	-115.586		5.84229	5.81682	5.82956	0.0254639		-231.176	-115.584	-115.584	-115.583	-115.584		5.8618	5.79479	5.8283	0.0670101		05_MeOH-MeOH_1.00	-231.194	-115.593	-115.593	-115.593	-115.593		5.19979	5.1752	5.18749	0.0245887			05_MeOH-MeOH_1.00	-230.209	-115.101	-115.101	-115.101	-115.101		05_MeOH-MeOH_1.00.out:	-230.206	-115.1	-115.1	-115.1
05_MeOH-MeOH_1.05	5.64391	05_MeOH-MeOH_1.05	-231.182	-115.586	-115.586	-115.586	-115.586		5.64264	5.61912	5.63088	0.0235105		-231.176	-115.584	-115.584	-115.583	-115.584		5.66014	5.59991	5.63002	0.0602331		05_MeOH-MeOH_1.05	-231.194	-115.593	-115.593	-115.593	-115.593		5.10284	5.08019	5.09151	0.0226431			05_MeOH-MeOH_1.05	-230.209	-115.101	-115.101	-115.101	-115.101		05_MeOH-MeOH_1.05.out:	-230.206	-115.1	-115.1	-115.1
05_MeOH-MeOH_1.10	5.33682	05_MeOH-MeOH_1.10	-231.181	-115.586	-115.586	-115.586	-115.586		5.32538	5.30371	5.31455	0.0216668		-231.176	-115.584	-115.584	-115.583	-115.584		5.34113	5.28694	5.31404	0.0541936		05_MeOH-MeOH_1.10	-231.193	-115.593	-115.593	-115.593	-115.593		4.87112	4.85031	4.86071	0.0208089			05_MeOH-MeOH_1.10	-230.209	-115.101	-115.101	-115.101	-115.101		05_MeOH-MeOH_1.10.out:	-230.206	-115.1	-115.1	-115.1
05_MeOH-MeOH_1.25	4.17157	05_MeOH-MeOH_1.25	-231.179	-115.586	-115.586	-115.586	-115.586		4.15747	4.14063	4.14905	0.0168365		-231.174	-115.584	-115.584	-115.583	-115.584		4.16771	4.12818	4.14794	0.039532		05_MeOH-MeOH_1.25	-231.192	-115.593	-115.593	-115.593	-115.593		3.88303	3.867	3.87502	0.0160293			05_MeOH-MeOH_1.25	-230.208	-115.101	-115.101	-115.101	-115.101		05_MeOH-MeOH_1.25.out:	-230.205	-115.1	-115.1	-115.1
05_MeOH-MeOH_1.50	2.53824	05_MeOH-MeOH_1.50	-231.177	-115.586	-115.586	-115.586	-115.586		2.54057	2.52992	2.53524	0.0106504		-231.171	-115.583	-115.584	-115.583	-115.584		2.54503	2.52179	2.53341	0.023237		05_MeOH-MeOH_1.50	-231.189	-115.593	-115.593	-115.593	-115.593		2.41496	2.40495	2.40996	0.0100132			05_MeOH-MeOH_1.50	-230.206	-115.101	-115.101	-115.101	-115.101		05_MeOH-MeOH_1.50.out:	-230.203	-115.1	-115.1	-115.1
05_MeOH-MeOH_2.00	1.01501	05_MeOH-MeOH_2.00	-231.174	-115.586	-115.586	-115.586	-115.586		1.02484	1.02096	1.0229	0.00388497		-231.169	-115.583	-115.584	-115.583	-115.584		1.02604	1.01761	1.02182	0.00842438		05_MeOH-MeOH_2.00	-231.187	-115.593	-115.593	-115.593	-115.593		0.991879	0.988283	0.990081	0.00359507			05_MeOH-MeOH_2.00	-230.204	-115.101	-115.101	-115.101	-115.101		05_MeOH-MeOH_2.00.out:	-230.201	-115.1	-115.1	-115.1
06_MeOH-MeNH2_0.90	7.06731	06_MeOH-MeNH2_0.90	-211.313	-115.586	-95.715	-115.586	-95.715		7.32773	7.30117	7.31445	0.0265617		-211.308	-115.583	-95.7132	-115.583	-95.7131		7.34656	7.26789	7.30722	0.0786707		06_MeOH-MeNH2_0.90	-211.327	-115.592	-95.7246	-115.592	-95.7246		6.08989	6.06389	6.07689	0.0260066			06_MeOH-MeNH2_0.90	-210.368	-115.101	-95.2629	-115.101	-95.2629		06_MeOH-MeNH2_0.90.out:	-210.365	-115.099	-95.2618	-115.099
06_MeOH-MeNH2_0.95	7.54963	06_MeOH-MeNH2_0.95	-211.313	-115.586	-95.715	-115.586	-95.715		7.72735	7.70279	7.71507	0.0245561		-211.309	-115.583	-95.7132	-115.583	-95.7131		7.74552	7.67453	7.71002	0.07099		06_MeOH-MeNH2_0.95	-211.328	-115.592	-95.7246	-115.592	-95.7246		6.67712	6.65315	6.66513	0.023974			06_MeOH-MeNH2_0.95	-210.37	-115.101	-95.2629	-115.101	-95.2629		06_MeOH-MeNH2_0.95.out:	-210.367	-115.099	-95.2618	-115.099
06_MeOH-MeNH2_1.00	7.60314	06_MeOH-MeNH2_1.00	-211.313	-115.586	-95.715	-115.586	-95.715		7.7201	7.69738	7.70874	0.0227274		-211.309	-115.583	-95.7132	-115.583	-95.7131		7.73714	7.67324	7.70519	0.0638951		06_MeOH-MeNH2_1.00	-211.328	-115.592	-95.7246	-115.592	-95.7246		6.82976	6.80763	6.81869	0.022125			06_MeOH-MeNH2_1.00	-210.371	-115.101	-95.2629	-115.101	-95.2629		06_MeOH-MeNH2_1.00.out:	-210.368	-115.099	-95.2618	-115.099
06_MeOH-MeNH2_1.05	7.38503	06_MeOH-MeNH2_1.05	-211.313	-115.586	-95.715	-115.586	-95.715		7.45903	7.438	7.44851	0.0210297		-211.308	-115.583	-95.7132	-115.583	-95.7131		7.47464	7.41728	7.44596	0.0573612		06_MeOH-MeNH2_1.05	-211.328	-115.592	-95.7246	-115.592	-95.7246		6.70469	6.68428	6.69449	0.0204114			06_MeOH-MeNH2_1.05	-210.371	-115.101	-95.2629	-115.101	-95.2629		06_MeOH-MeNH2_1.05.out:	-210.368	-115.099	-95.2618	-115.099
06_MeOH-MeNH2_1.10	7.00455	06_MeOH-MeNH2_1.10	-211.312	-115.586	-95.715	-115.586	-95.715		7.0495	7.03006	7.03978	0.0194365		-211.308	-115.583	-95.7132	-115.583	-95.7131		7.06358	7.01215	7.03786	0.0514348		06_MeOH-MeNH2_1.10	-211.327	-115.592	-95.7246	-115.592	-95.7246		6.41009	6.39128	6.40069	0.0188062			06_MeOH-MeNH2_1.10	-210.371	-115.101	-95.2629	-115.101	-95.2629		06_MeOH-MeNH2_1.10.out:	-210.368	-115.099	-95.2618	-115.099
06_MeOH-MeNH2_1.25	5.51719	06_MeOH-MeNH2_1.25	-211.31	-115.586	-95.715	-115.586	-95.715		5.52565	5.51041	5.51803	0.0152412		-211.305	-115.583	-95.7131	-115.583	-95.7131		5.53515	5.498	5.51657	0.0371493		06_MeOH-MeNH2_1.25	-211.325	-115.592	-95.7246	-115.592	-95.7246		5.13358	5.11898	5.12628	0.014601			06_MeOH-MeNH2_1.25	-210.37	-115.101	-95.2629	-115.101	-95.2629		06_MeOH-MeNH2_1.25.out:	-210.368	-115.099	-95.2618	-115.099
06_MeOH-MeNH2_1.50	3.35163	06_MeOH-MeNH2_1.50	-211.306	-115.586	-95.715	-115.586	-95.715		3.36014	3.35006	3.3551	0.0100728		-211.302	-115.583	-95.7131	-115.583	-95.7131		3.36576	3.3424	3.35408	0.0233631		06_MeOH-MeNH2_1.50	-211.322	-115.592	-95.7246	-115.592	-95.7246		3.17916	3.16967	3.17441	0.00948672			06_MeOH-MeNH2_1.50	-210.368	-115.101	-95.2629	-115.101	-95.2629		06_MeOH-MeNH2_1.50.out:	-210.365	-115.099	-95.2618	-115.099
06_MeOH-MeNH2_2.00	1.2771	06_MeOH-MeNH2_2.00	-211.303	-115.586	-95.715	-115.586	-95.715		1.29238	1.28777	1.29007	0.00461365		-211.298	-115.583	-95.7131	-115.583	-95.7131		1.29688	1.28516	1.29102	0.0117228		06_MeOH-MeNH2_2.00	-211.319	-115.592	-95.7246	-115.592	-95.7246		1.24482	1.24059	1.2427	0.0042234			06_MeOH-MeNH2_2.00	-210.365	-115.101	-95.2629	-115.101	-95.2629		06_MeOH-MeNH2_2.00.out:	-210.363	-115.099	-95.2618	-115.099
07_MeOH-Peptide_0.90	7.78382	07_MeOH-Peptide_0.90	-363.789	-115.586	-248.19	-115.586	-248.19		7.72464	7.68088	7.70276	0.0437528		-363.781	-115.583	-248.185	-115.583	-248.185		7.75511	7.64259	7.69885	0.112516		07_MeOH-Peptide_0.90	-363.797	-115.593	-248.194	-115.592	-248.194		6.46504	6.42315	6.4441	0.0418913			07_MeOH-Peptide_0.90	-362.229	-115.101	-247.122	-115.101	-247.122		07_MeOH-Peptide_0.90.out:	-362.225	-115.099	-247.119	-115.099
07_MeOH-Peptide_0.95	8.27017	07_MeOH-Peptide_0.95	-363.789	-115.586	-248.19	-115.586	-248.19		8.17336	8.13215	8.15276	0.0412122		-363.782	-115.583	-248.185	-115.583	-248.185		8.20276	8.0992	8.15098	0.103558		07_MeOH-Peptide_0.95	-363.798	-115.593	-248.194	-115.592	-248.194		7.08851	7.04918	7.06884	0.0393289			07_MeOH-Peptide_0.95	-362.231	-115.101	-247.122	-115.101	-247.122		07_MeOH-Peptide_0.95.out:	-362.226	-115.099	-247.119	-115.099
07_MeOH-Peptide_1.00	8.32956	07_MeOH-Peptide_1.00	-363.789	-115.586	-248.19	-115.586	-248.19		8.2091	8.17029	8.1897	0.0388097		-363.782	-115.583	-248.185	-115.583	-248.185		8.23642	8.14145	8.18893	0.0949621		07_MeOH-Peptide_1.00	-363.798	-115.592	-248.194	-115.592	-248.194		7.27455	7.23763	7.25609	0.0369182			07_MeOH-Peptide_1.00	-362.231	-115.101	-247.122	-115.101	-247.122		07_MeOH-Peptide_1.00.out:	-362.227	-115.099	-247.119	-115.099
07_MeOH-Peptide_1.05	8.11612	07_MeOH-Peptide_1.05	-363.789	-115.586	-248.19	-115.586	-248.19		7.9835	7.947	7.96525	0.0365044		-363.781	-115.583	-248.185	-115.583	-248.185		8.0081	7.92132	7.96471	0.0867781		07_MeOH-Peptide_1.05	-363.798	-115.592	-248.194	-115.592	-248.194		7.17816	7.14355	7.16086	0.0346146			07_MeOH-Peptide_1.05	-362.232	-115.101	-247.122	-115.101	-247.122		07_MeOH-Peptide_1.05.out:	-362.227	-115.099	-247.119	-115.099
07_MeOH-Peptide_1.10	7.73713	07_MeOH-Peptide_1.10	-363.788	-115.586	-248.19	-115.586	-248.19		7.60115	7.56687	7.58401	0.0342845		-363.781	-115.583	-248.185	-115.583	-248.185		7.62283	7.54363	7.58323	0.0792068		07_MeOH-Peptide_1.10	-363.798	-115.592	-248.194	-115.592	-248.194		6.90629	6.87388	6.89008	0.0324049			07_MeOH-Peptide_1.10	-362.232	-115.101	-247.122	-115.101	-247.122		07_MeOH-Peptide_1.10.out:	-362.227	-115.099	-247.119	-115.099
07_MeOH-Peptide_1.25	6.2281	07_MeOH-Peptide_1.25	-363.786	-115.586	-248.19	-115.586	-248.19		6.11065	6.08248	6.09656	0.028176		-363.778	-115.583	-248.185	-115.583	-248.185		6.12371	6.06372	6.09372	0.059992		07_MeOH-Peptide_1.25	-363.796	-115.592	-248.194	-115.592	-248.194		5.66009	5.63371	5.6469	0.0263893			07_MeOH-Peptide_1.25	-362.23	-115.101	-247.122	-115.101	-247.122		07_MeOH-Peptide_1.25.out:	-362.226	-115.099	-247.119	-115.099
07_MeOH-Peptide_1.50	3.66818	07_MeOH-Peptide_1.50	-363.782	-115.586	-248.19	-115.586	-248.19		3.60644	3.5886	3.59752	0.0178381		-363.774	-115.583	-248.185	-115.583	-248.185		3.60922	3.57553	3.59238	0.0336936		07_MeOH-Peptide_1.50	-363.792	-115.592	-248.194	-115.592	-248.194		3.40205	3.38557	3.39381	0.0164752			07_MeOH-Peptide_1.50	-362.228	-115.101	-247.122	-115.101	-247.122		07_MeOH-Peptide_1.50.out:	-362.223	-115.099	-247.119	-115.099
07_MeOH-Peptide_2.00	1.10412	07_MeOH-Peptide_2.00	-363.778	-115.586	-248.19	-115.586	-248.19		1.09163	1.08815	1.08989	0.00347711		-363.77	-115.583	-248.185	-115.583	-248.185		1.09196	1.08437	1.08816	0.00758828		07_MeOH-Peptide_2.00	-363.789	-115.592	-248.194	-115.592	-248.194		1.05421	1.051	1.05261	0.00321346			07_MeOH-Peptide_2.00	-362.224	-115.101	-247.122	-115.101	-247.122		07_MeOH-Peptide_2.00.out:	-362.22	-115.099	-247.119	-115.099
08_MeOH-Water_0.90	4.6843	08_MeOH-Water_0.90	-191.961	-115.586	-76.3675	-115.586	-76.3675		4.71032	4.67842	4.69437	0.0319018		-191.956	-115.584	-76.3655	-115.584	-76.3654		4.73666	4.65671	4.69668	0.0799592		08_MeOH-Water_0.90	-191.968	-115.593	-76.3685	-115.593	-76.3685		4.01364	3.98242	3.99803	0.0312233			08_MeOH-Water_0.90	-191.172	-115.101	-76.0671	-115.101	-76.0671		08_MeOH-Water_0.90.out:	-191.17	-115.1	-76.0661	-115.1
08_MeOH-Water_0.95	5.03233	08_MeOH-Water_0.95	-191.962	-115.586	-76.3675	-115.586	-76.3675		5.02758	4.99767	5.01263	0.0299135		-191.957	-115.584	-76.3655	-115.584	-76.3654		5.05288	4.98005	5.01646	0.0728369		08_MeOH-Water_0.95	-191.968	-115.593	-76.3685	-115.593	-76.3685		4.45181	4.42261	4.43721	0.0292062			08_MeOH-Water_0.95	-191.174	-115.101	-76.0671	-115.101	-76.0671		08_MeOH-Water_0.95.out:	-191.171	-115.1	-76.0661	-115.1
08_MeOH-Water_1.00	5.06346	08_MeOH-Water_1.00	-191.962	-115.586	-76.3675	-115.586	-76.3675		5.04152	5.01349	5.02751	0.0280244		-191.957	-115.584	-76.3655	-115.584	-76.3654		5.06537	4.99893	5.03215	0.0664408		08_MeOH-Water_1.00	-191.968	-115.593	-76.3685	-115.593	-76.3685		4.56532	4.53803	4.55168	0.0272947			08_MeOH-Water_1.00	-191.174	-115.101	-76.0671	-115.101	-76.0671		08_MeOH-Water_1.00.out:	-191.172	-115.1	-76.0661	-115.1
08_MeOH-Water_1.05	4.90126	08_MeOH-Water_1.05	-191.961	-115.586	-76.3675	-115.586	-76.3675		4.87197	4.84577	4.85887	0.0261988		-191.957	-115.584	-76.3655	-115.584	-76.3654		4.89429	4.83353	4.86391	0.060761		08_MeOH-Water_1.05	-191.968	-115.593	-76.3685	-115.593	-76.3685		4.47775	4.4523	4.46503	0.0254516			08_MeOH-Water_1.05	-191.174	-115.101	-76.0671	-115.101	-76.0671		08_MeOH-Water_1.05.out:	-191.172	-115.1	-76.0661	-115.1
08_MeOH-Water_1.10	4.62922	08_MeOH-Water_1.10	-191.961	-115.586	-76.3675	-115.586	-76.3675		4.59906	4.57462	4.58684	0.0244335		-191.956	-115.584	-76.3655	-115.584	-76.3654		4.61992	4.56415	4.59203	0.0557712		08_MeOH-Water_1.10	-191.968	-115.593	-76.3685	-115.593	-76.3685		4.272	4.24832	4.26016	0.0236743			08_MeOH-Water_1.10	-191.174	-115.101	-76.0671	-115.101	-76.0671		08_MeOH-Water_1.10.out:	-191.172	-115.1	-76.0661	-115.1
08_MeOH-Water_1.25	3.61094	08_MeOH-Water_1.25	-191.959	-115.586	-76.3675	-115.586	-76.3675		3.59417	3.57465	3.58441	0.0195174		-191.955	-115.584	-76.3655	-115.584	-76.3654		3.61074	3.56733	3.58904	0.0434049		08_MeOH-Water_1.25	-191.967	-115.593	-76.3685	-115.593	-76.3685		3.40433	3.38556	3.39494	0.0187683			08_MeOH-Water_1.25	-191.173	-115.101	-76.0671	-115.101	-76.0671		08_MeOH-Water_1.25.out:	-191.171	-115.1	-76.0661	-115.1
08_MeOH-Water_1.50	2.20797	08_MeOH-Water_1.50	-191.957	-115.586	-76.3675	-115.586	-76.3675		2.21276	2.20018	2.20647	0.0125762		-191.952	-115.584	-76.3655	-115.584	-76.3654		2.22468	2.19583	2.21026	0.0288531		08_MeOH-Water_1.50	-191.965	-115.593	-76.3685	-115.593	-76.3685		2.13079	2.11883	2.12481	0.0119665			08_MeOH-Water_1.50	-191.172	-115.101	-76.0671	-115.101	-76.0671		08_MeOH-Water_1.50.out:	-191.169	-115.1	-76.0661	-115.1
08_MeOH-Water_2.00	0.909445	08_MeOH-Water_2.00	-191.955	-115.586	-76.3675	-115.586	-76.3675		0.92068	0.915827	0.918253	0.00485287		-191.95	-115.584	-76.3654	-115.584	-76.3654		0.927434	0.9137	0.920567	0.013734		08_MeOH-Water_2.00	-191.963	-115.593	-76.3685	-115.593	-76.3685		0.900839	0.896292	0.898565	0.00454688			08_MeOH-Water_2.00	-191.17	-115.101	-76.0671	-115.101	-76.0671		08_MeOH-Water_2.00.out:	-191.167	-115.1	-76.0661	-115.1
09_MeNH2-MeOH_0.90	2.8623	09_MeNH2-MeOH_0.90	-211.306	-95.715	-115.586	-95.715	-115.586		2.87208	2.84894	2.86051	0.0231436		-211.301	-95.7131	-115.584	-95.7131	-115.584		2.89085	2.82666	2.85875	0.0641918		09_MeNH2-MeOH_0.90	-211.321	-95.7245	-115.593	-95.7245	-115.593		2.14419	2.12183	2.13301	0.0223572			09_MeNH2-MeOH_0.90	-210.364	-95.2628	-115.102	-95.2628	-115.102		09_MeNH2-MeOH_0.90.out:	-210.362	-95.2617	-115.1	-95.2617
09_MeNH2-MeOH_0.95	3.07802	09_MeNH2-MeOH_0.95	-211.306	-95.715	-115.586	-95.715	-115.586		3.06634	3.04531	3.05583	0.0210271		-211.302	-95.7131	-115.584	-95.7131	-115.584		3.08314	3.02582	3.05448	0.0573143		09_MeNH2-MeOH_0.95	-211.321	-95.7245	-115.593	-95.7245	-115.593		2.46876	2.44852	2.45864	0.0202431			09_MeNH2-MeOH_0.95	-210.365	-95.2628	-115.102	-95.2628	-115.102		09_MeNH2-MeOH_0.95.out:	-210.363	-95.2617	-115.1	-95.2617
09_MeNH2-MeOH_1.00	3.06325	09_MeNH2-MeOH_1.00	-211.306	-95.715	-115.586	-95.715	-115.586		3.04123	3.02217	3.0317	0.0190579		-211.302	-95.7131	-115.584	-95.7131	-115.584		3.05627	3.00494	3.03061	0.0513293		09_MeNH2-MeOH_1.00	-211.321	-95.7245	-115.593	-95.7245	-115.593		2.54918	2.53089	2.54004	0.0182849			09_MeNH2-MeOH_1.00	-210.366	-95.2628	-115.102	-95.2628	-115.102		09_MeNH2-MeOH_1.00.out:	-210.363	-95.2617	-115.1	-95.2617
09_MeNH2-MeOH_1.05	2.91723	09_MeNH2-MeOH_1.05	-211.306	-95.715	-115.586	-95.715	-115.586		2.89189	2.87466	2.88328	0.0172323		-211.301	-95.7131	-115.584	-95.7131	-115.584		2.90537	2.85933	2.88235	0.0460311		09_MeNH2-MeOH_1.05	-211.321	-95.7245	-115.593	-95.7245	-115.593		2.48559	2.46911	2.47735	0.0164816			09_MeNH2-MeOH_1.05	-210.366	-95.2628	-115.102	-95.2628	-115.102		09_MeNH2-MeOH_1.05.out:	-210.364	-95.2617	-115.1	-95.2617
09_MeNH2-MeOH_1.10	2.70387	09_MeNH2-MeOH_1.10	-211.306	-95.715	-115.586	-95.715	-115.586		2.67938	2.66384	2.67161	0.0155389		-211.301	-95.7131	-115.584	-95.7131	-115.584		2.69148	2.65017	2.67083	0.0413124		09_MeNH2-MeOH_1.10	-211.321	-95.7245	-115.593	-95.7245	-115.593		2.34268	2.32785	2.33526	0.0148207			09_MeNH2-MeOH_1.10	-210.367	-95.2628	-115.102	-95.2628	-115.102		09_MeNH2-MeOH_1.10.out:	-210.364	-95.2617	-115.1	-95.2617
09_MeNH2-MeOH_1.25	1.98385	09_MeNH2-MeOH_1.25	-211.304	-95.715	-115.586	-95.715	-115.586		1.97043	1.95932	1.96488	0.0111079		-211.3	-95.7131	-115.584	-95.7131	-115.584		1.97931	1.94974	1.96452	0.0295691		09_MeNH2-MeOH_1.25	-211.32	-95.7245	-115.593	-95.7245	-115.593		1.77449	1.76397	1.76923	0.0105196			09_MeNH2-MeOH_1.25	-210.366	-95.2628	-115.102	-95.2628	-115.102		09_MeNH2-MeOH_1.25.out:	-210.364	-95.2617	-115.1	-95.2617
09_MeNH2-MeOH_1.50	1.10419	09_MeNH2-MeOH_1.50	-211.303	-95.715	-115.586	-95.715	-115.586		1.10322	1.09722	1.10022	0.00600352		-211.298	-95.7131	-115.584	-95.7131	-115.584		1.1095	1.09246	1.10098	0.017038		09_MeNH2-MeOH_1.50	-211.319	-95.7245	-115.593	-95.7245	-115.593		1.01737	1.01174	1.01455	0.00563092			09_MeNH2-MeOH_1.50	-210.366	-95.2628	-115.102	-95.2628	-115.102		09_MeNH2-MeOH_1.50.out:	-210.363	-95.2617	-115.1	-95.2617
09_MeNH2-MeOH_2.00	0.39645	09_MeNH2-MeOH_2.00	-211.302	-95.715	-115.586	-95.715	-115.586		0.399228	0.397448	0.398338	0.00178019		-211.297	-95.7131	-115.584	-95.7131	-115.584		0.402905	0.396121	0.399513	0.00678403		09_MeNH2-MeOH_2.00	-211.318	-95.7245	-115.593	-95.7245	-115.593		0.377734	0.376093	0.376914	0.00164078			09_MeNH2-MeOH_2.00	-210.365	-95.2628	-115.102	-95.2628	-115.102		09_MeNH2-MeOH_2.00.out:	-210.362	-95.2617	-115.1	-95.2617
10_MeNH2-MeNH2_0.90	3.72444	10_MeNH2-MeNH2_0.90	-191.436	-95.715	-95.715	-95.715	-95.715		3.96758	3.94491	3.95625	0.0226743		-191.432	-95.7131	-95.7131	-95.713	-95.7131		3.98896	3.92039	3.95468	0.0685778		10_MeNH2-MeNH2_0.90	-191.454	-95.7245	-95.7246	-95.7245	-95.7245		2.8449	2.82284	2.83387	0.0220601			10_MeNH2-MeNH2_0.90	-190.524	-95.2628	-95.2629	-95.2628	-95.2629		10_MeNH2-MeNH2_0.90.out:	-190.522	-95.2616	-95.2617	-95.2616
10_MeNH2-MeNH2_0.95	4.11268	10_MeNH2-MeNH2_0.95	-191.437	-95.715	-95.715	-95.715	-95.715		4.28261	4.26197	4.27229	0.020643		-191.433	-95.7131	-95.7131	-95.713	-95.7131		4.30109	4.24011	4.2706	0.0609797		10_MeNH2-MeNH2_0.95	-191.454	-95.7245	-95.7246	-95.7245	-95.7245		3.35399	3.33399	3.34399	0.0200017			10_MeNH2-MeNH2_0.95	-190.526	-95.2628	-95.2629	-95.2628	-95.2629		10_MeNH2-MeNH2_0.95.out:	-190.524	-95.2616	-95.2617	-95.2616
10_MeNH2-MeNH2_1.00	4.16466	10_MeNH2-MeNH2_1.00	-191.437	-95.715	-95.715	-95.715	-95.715		4.28359	4.26485	4.27422	0.018741		-191.433	-95.7131	-95.7131	-95.713	-95.7131		4.29949	4.24517	4.27233	0.0543178		10_MeNH2-MeNH2_1.00	-191.455	-95.7245	-95.7246	-95.7245	-95.7245		3.51428	3.4962	3.50524	0.0180819			10_MeNH2-MeNH2_1.00	-190.527	-95.2628	-95.2629	-95.2628	-95.2629		10_MeNH2-MeNH2_1.00.out:	-190.525	-95.2616	-95.2617	-95.2616
10_MeNH2-MeNH2_1.05	4.01591	10_MeNH2-MeNH2_1.05	-191.436	-95.715	-95.715	-95.715	-95.715		4.09978	4.08281	4.0913	0.0169747		-191.433	-95.7131	-95.7131	-95.713	-95.7131		4.11346	4.06499	4.08923	0.0484713		10_MeNH2-MeNH2_1.05	-191.455	-95.7245	-95.7246	-95.7245	-95.7245		3.46149	3.44518	3.45334	0.016308			10_MeNH2-MeNH2_1.05	-190.528	-95.2628	-95.2629	-95.2628	-95.2629		10_MeNH2-MeNH2_1.05.out:	-190.526	-95.2616	-95.2617	-95.2616
10_MeNH2-MeNH2_1.10	3.75635	10_MeNH2-MeNH2_1.10	-191.436	-95.715	-95.715	-95.715	-95.715		3.81658	3.80122	3.8089	0.01536		-191.432	-95.7131	-95.7131	-95.713	-95.7131		3.8284	3.78506	3.80673	0.0433394		10_MeNH2-MeNH2_1.10	-191.454	-95.7245	-95.7246	-95.7245	-95.7245		3.28574	3.27105	3.2784	0.0146963			10_MeNH2-MeNH2_1.10	-190.528	-95.2628	-95.2629	-95.2628	-95.2629		10_MeNH2-MeNH2_1.10.out:	-190.526	-95.2616	-95.2617	-95.2616
10_MeNH2-MeNH2_1.25	2.79299	10_MeNH2-MeNH2_1.25	-191.434	-95.715	-95.715	-95.715	-95.715		2.82086	2.80951	2.81518	0.0113509		-191.431	-95.7131	-95.7131	-95.713	-95.7131		2.8287	2.7976	2.81315	0.0310993		10_MeNH2-MeNH2_1.25	-191.453	-95.7245	-95.7245	-95.7245	-95.7245		2.51061	2.49987	2.50524	0.0107418			10_MeNH2-MeNH2_1.25	-190.528	-95.2628	-95.2629	-95.2628	-95.2629		10_MeNH2-MeNH2_1.25.out:	-190.526	-95.2616	-95.2617	-95.2616
10_MeNH2-MeNH2_1.50	1.30885	10_MeNH2-MeNH2_1.50	-191.432	-95.715	-95.715	-95.715	-95.715		1.32461	1.31879	1.3217	0.00582002		-191.428	-95.7131	-95.7131	-95.713	-95.7131		1.32954	1.31343	1.32148	0.0161127		10_MeNH2-MeNH2_1.50	-191.451	-95.7245	-95.7245	-95.7245	-95.7245		1.21492	1.20952	1.21222	0.00539961			10_MeNH2-MeNH2_1.50	-190.527	-95.2628	-95.2629	-95.2628	-95.2629		10_MeNH2-MeNH2_1.50.out:	-190.525	-95.2616	-95.2617	-95.2616
10_MeNH2-MeNH2_2.00	0.38974	10_MeNH2-MeNH2_2.00	-191.431	-95.715	-95.715	-95.715	-95.715		0.39825	0.396365	0.397307	0.00188427		-191.427	-95.713	-95.7131	-95.713	-95.7131		0.400774	0.395425	0.3981	0.0053491		10_MeNH2-MeNH2_2.00	-191.45	-95.7245	-95.7245	-95.7245	-95.7245		0.374928	0.373215	0.374072	0.00171206			10_MeNH2-MeNH2_2.00	-190.526	-95.2628	-95.2629	-95.2628	-95.2629		10_MeNH2-MeNH2_2.00.out:	-190.524	-95.2616	-95.2617	-95.2616
11_MeNH2-Peptide_0.90	5.00913	11_MeNH2-Peptide_0.90	-343.914	-95.715	-248.19	-95.7149	-248.19		5.20623	5.16738	5.1868	0.0388513		-343.907	-95.7131	-248.185	-95.713	-248.185		5.23797	5.13365	5.18581	0.104323		11_MeNH2-Peptide_0.90	-343.925	-95.7245	-248.195	-95.7245	-248.195		3.80308	3.76584	3.78446	0.0372321			11_MeNH2-Peptide_0.90	-342.384	-95.2628	-247.122	-95.2628	-247.122		11_MeNH2-Peptide_0.90.out:	-342.381	-95.2616	-247.119	-95.2616
11_MeNH2-Peptide_0.95	5.40909	11_MeNH2-Peptide_0.95	-343.914	-95.715	-248.19	-95.7149	-248.19		5.53889	5.50298	5.52093	0.0359133		-343.907	-95.7131	-248.185	-95.713	-248.185		5.5672	5.47229	5.51974	0.094914		11_MeNH2-Peptide_0.95	-343.926	-95.7245	-248.195	-95.7245	-248.195		4.34975	4.31548	4.33261	0.0342739			11_MeNH2-Peptide_0.95	-342.386	-95.2628	-247.122	-95.2628	-247.122		11_MeNH2-Peptide_0.95.out:	-342.382	-95.2616	-247.119	-95.2616
11_MeNH2-Peptide_1.00	5.45281	11_MeNH2-Peptide_1.00	-343.914	-95.715	-248.19	-95.7149	-248.19		5.53516	5.50199	5.51857	0.0331665		-343.907	-95.7131	-248.185	-95.713	-248.185		5.56018	5.47372	5.51695	0.0864538		11_MeNH2-Peptide_1.00	-343.926	-95.7245	-248.195	-95.7245	-248.195		4.52567	4.49415	4.50991	0.0315176			11_MeNH2-Peptide_1.00	-342.388	-95.2628	-247.122	-95.2628	-247.122		11_MeNH2-Peptide_1.00.out:	-342.384	-95.2616	-247.119	-95.2616
11_MeNH2-Peptide_1.05	5.27745	11_MeNH2-Peptide_1.05	-343.914	-95.715	-248.19	-95.7149	-248.19		5.32697	5.29637	5.31167	0.0305952		-343.907	-95.7131	-248.185	-95.713	-248.185		5.34891	5.27019	5.30955	0.0787202		11_MeNH2-Peptide_1.05	-343.926	-95.7245	-248.195	-95.7245	-248.195		4.46886	4.43991	4.45438	0.028951			11_MeNH2-Peptide_1.05	-342.388	-95.2628	-247.122	-95.2628	-247.122		11_MeNH2-Peptide_1.05.out:	-342.384	-95.2616	-247.119	-95.2616
11_MeNH2-Peptide_1.10	4.97585	11_MeNH2-Peptide_1.10	-343.913	-95.715	-248.19	-95.7149	-248.19		5.00333	4.97515	4.98924	0.0281845		-343.906	-95.7131	-248.185	-95.713	-248.185		5.02249	4.95088	4.98669	0.071603		11_MeNH2-Peptide_1.10	-343.926	-95.7245	-248.195	-95.7245	-248.195		4.27258	4.24602	4.2593	0.0265606			11_MeNH2-Peptide_1.10	-342.388	-95.2628	-247.122	-95.2628	-247.122		11_MeNH2-Peptide_1.10.out:	-342.384	-95.2616	-247.119	-95.2616
11_MeNH2-Peptide_1.25	3.2298	11_MeNH2-Peptide_1.25	-343.91	-95.7149	-248.19	-95.7149	-248.19		3.22395	3.20547	3.21471	0.0184763		-343.903	-95.713	-248.185	-95.713	-248.185		3.23409	3.18937	3.21173	0.0447178		11_MeNH2-Peptide_1.25	-343.924	-95.7245	-248.195	-95.7245	-248.195		2.86909	2.85195	2.86052	0.0171376			11_MeNH2-Peptide_1.25	-342.388	-95.2628	-247.122	-95.2628	-247.122		11_MeNH2-Peptide_1.25.out:	-342.384	-95.2616	-247.119	-95.2616
11_MeNH2-Peptide_1.50	1.41274	11_MeNH2-Peptide_1.50	-343.908	-95.7149	-248.19	-95.7149	-248.19		1.40571	1.39779	1.40175	0.00792101		-343.901	-95.713	-248.185	-95.713	-248.185		1.4096	1.39046	1.40003	0.0191342		11_MeNH2-Peptide_1.50	-343.921	-95.7245	-248.195	-95.7245	-248.195		1.28805	1.28073	1.28439	0.00731672			11_MeNH2-Peptide_1.50	-342.386	-95.2628	-247.122	-95.2628	-247.122		11_MeNH2-Peptide_1.50.out:	-342.382	-95.2616	-247.119	-95.2616
11_MeNH2-Peptide_2.00	0.460212	11_MeNH2-Peptide_2.00	-343.906	-95.7149	-248.19	-95.7149	-248.19		0.45814	0.455847	0.456994	0.00229293		-343.899	-95.713	-248.185	-95.713	-248.185		0.460841	0.454775	0.457808	0.00606537		11_MeNH2-Peptide_2.00	-343.92	-95.7245	-248.195	-95.7245	-248.195		0.433299	0.431179	0.432239	0.00211978			11_MeNH2-Peptide_2.00	-342.385	-95.2628	-247.122	-95.2628	-247.122		11_MeNH2-Peptide_2.00.out:	-342.381	-95.2616	-247.119	-95.2616
12_MeNH2-Water_0.90	6.83393	12_MeNH2-Water_0.90	-172.094	-95.715	-76.3673	-95.715	-76.3673		7.17949	7.15038	7.16493	0.0291095		-172.09	-95.7132	-76.3653	-95.7131	-76.3653		7.20372	7.11909	7.1614	0.0846295		12_MeNH2-Water_0.90	-172.103	-95.7246	-76.3683	-95.7246	-76.3683		6.12298	6.0944	6.10869	0.0285837			12_MeNH2-Water_0.90	-171.335	-95.2629	-76.0665	-95.2629	-76.0665		12_MeNH2-Water_0.90.out:	-171.332	-95.2618	-76.0655	-95.2617
12_MeNH2-Water_0.95	7.27212	12_MeNH2-Water_0.95	-172.094	-95.715	-76.3673	-95.715	-76.3673		7.53452	7.50774	7.52113	0.0267756		-172.09	-95.7132	-76.3653	-95.7131	-76.3653		7.55825	7.48174	7.51999	0.0765097		12_MeNH2-Water_0.95	-172.103	-95.7246	-76.3683	-95.7246	-76.3683		6.64145	6.61521	6.62833	0.0262459			12_MeNH2-Water_0.95	-171.336	-95.2629	-76.0665	-95.2629	-76.0665		12_MeNH2-Water_0.95.out:	-171.334	-95.2618	-76.0655	-95.2617
12_MeNH2-Water_1.00	7.29992	12_MeNH2-Water_1.00	-172.094	-95.715	-76.3673	-95.715	-76.3673		7.49949	7.47485	7.48717	0.0246456		-172.09	-95.7131	-76.3653	-95.7131	-76.3653		7.52201	7.45302	7.48752	0.0689894		12_MeNH2-Water_1.00	-172.104	-95.7246	-76.3683	-95.7246	-76.3683		6.74552	6.7214	6.73346	0.0241171			12_MeNH2-Water_1.00	-171.337	-95.2629	-76.0665	-95.2629	-76.0665		12_MeNH2-Water_1.00.out:	-171.335	-95.2618	-76.0655	-95.2617
12_MeNH2-Water_1.05	7.07008	12_MeNH2-Water_1.05	-172.094	-95.715	-76.3673	-95.715	-76.3673		7.2231	7.20042	7.21176	0.0226821		-172.09	-95.7131	-76.3653	-95.7131	-76.3653		7.24389	7.18188	7.21289	0.062007		12_MeNH2-Water_1.05	-172.103	-95.7246	-76.3683	-95.7246	-76.3683		6.58718	6.56503	6.57611	0.0221565			12_MeNH2-Water_1.05	-171.337	-95.2629	-76.0665	-95.2629	-76.0665		12_MeNH2-Water_1.05.out:	-171.335	-95.2618	-76.0655	-95.2617
12_MeNH2-Water_1.10	6.68838	12_MeNH2-Water_1.10	-172.093	-95.715	-76.3673	-95.715	-76.3673		6.80758	6.78673	6.79715	0.0208551		-172.089	-95.7131	-76.3653	-95.7131	-76.3653		6.82637	6.77074	6.79856	0.0556357		12_MeNH2-Water_1.10	-172.103	-95.7246	-76.3683	-95.7246	-76.3683		6.27114	6.2508	6.26097	0.0203325			12_MeNH2-Water_1.10	-171.337	-95.2629	-76.0665	-95.2629	-76.0665		12_MeNH2-Water_1.10.out:	-171.335	-95.2618	-76.0655	-95.2617
12_MeNH2-Water_1.25	5.23424	12_MeNH2-Water_1.25	-172.091	-95.715	-76.3673	-95.715	-76.3673		5.29948	5.28342	5.29145	0.0160565		-172.087	-95.7131	-76.3653	-95.7131	-76.3653		5.31227	5.27215	5.29221	0.0401142		12_MeNH2-Water_1.25	-172.101	-95.7246	-76.3683	-95.7246	-76.3683		4.97568	4.96013	4.96791	0.0155501			12_MeNH2-Water_1.25	-171.336	-95.2629	-76.0665	-95.2629	-76.0665		12_MeNH2-Water_1.25.out:	-171.334	-95.2618	-76.0655	-95.2617
12_MeNH2-Water_1.50	3.15783	12_MeNH2-Water_1.50	-172.087	-95.715	-76.3673	-95.715	-76.3673		3.19831	3.18831	3.19331	0.0100066		-172.083	-95.7131	-76.3653	-95.7131	-76.3653		3.20512	3.18128	3.1932	0.0238352		12_MeNH2-Water_1.50	-172.098	-95.7246	-76.3683	-95.7246	-76.3683		3.05303	3.04344	3.04823	0.00958938			12_MeNH2-Water_1.50	-171.334	-95.2629	-76.0665	-95.2629	-76.0665		12_MeNH2-Water_1.50.out:	-171.331	-95.2618	-76.0655	-95.2617
12_MeNH2-Water_2.00	1.19853	12_MeNH2-Water_2.00	-172.084	-95.715	-76.3673	-95.715	-76.3673		1.22345	1.21995	1.2217	0.00349987		-172.08	-95.7131	-76.3653	-95.7131	-76.3653		1.22788	1.21806	1.22297	0.00982083		12_MeNH2-Water_2.00	-172.095	-95.7246	-76.3683	-95.7246	-76.3683		1.18734	1.18404	1.18569	0.00329652			12_MeNH2-Water_2.00	-171.331	-95.2629	-76.0665	-95.2629	-76.0665		12_MeNH2-Water_2.00.out:	-171.329	-95.2617	-76.0655	-95.2617
13_Peptide-MeOH_0.90	5.81102	13_Peptide-MeOH_0.90	-363.786	-248.19	-115.586	-248.19	-115.586		5.96299	5.93366	5.94832	0.0293217		-363.778	-248.185	-115.584	-248.185	-115.584		5.98501	5.90246	5.94373	0.0825514		13_Peptide-MeOH_0.90	-363.795	-248.195	-115.593	-248.195	-115.593		4.81473	4.78617	4.80045	0.028565			13_Peptide-MeOH_0.90	-362.226	-247.122	-115.102	-247.122	-115.102		13_Peptide-MeOH_0.90.out:	-362.222	-247.119	-115.1	-247.119
13_Peptide-MeOH_0.95	6.22383	13_Peptide-MeOH_0.95	-363.787	-248.19	-115.586	-248.19	-115.586		6.31651	6.28944	6.30298	0.0270733		-363.779	-248.185	-115.584	-248.185	-115.584		6.33619	6.26221	6.2992	0.0739832		13_Peptide-MeOH_0.95	-363.796	-248.195	-115.593	-248.195	-115.593		5.34638	5.32009	5.33324	0.0262942			13_Peptide-MeOH_0.95	-362.228	-247.122	-115.102	-247.122	-115.102		13_Peptide-MeOH_0.95.out:	-362.224	-247.119	-115.1	-247.119
13_Peptide-MeOH_1.00	6.27817	13_Peptide-MeOH_1.00	-363.787	-248.19	-115.586	-248.19	-115.586		6.33135	6.30639	6.31887	0.0249633		-363.779	-248.185	-115.584	-248.185	-115.584		6.3487	6.28232	6.31551	0.0663788		13_Peptide-MeOH_1.00	-363.796	-248.195	-115.593	-248.195	-115.593		5.50977	5.48561	5.49769	0.0241642			13_Peptide-MeOH_1.00	-362.229	-247.122	-115.102	-247.122	-115.102		13_Peptide-MeOH_1.00.out:	-362.224	-247.119	-115.1	-247.119
13_Peptide-MeOH_1.05	6.1095	13_Peptide-MeOH_1.05	-363.787	-248.19	-115.586	-248.19	-115.586		6.13753	6.11456	6.12605	0.0229677		-363.779	-248.185	-115.584	-248.185	-115.584		6.15279	6.09306	6.12292	0.0597273		13_Peptide-MeOH_1.05	-363.796	-248.195	-115.593	-248.195	-115.593		5.44025	5.41809	5.42917	0.0221541			13_Peptide-MeOH_1.05	-362.229	-247.122	-115.102	-247.122	-115.102		13_Peptide-MeOH_1.05.out:	-362.225	-247.119	-115.1	-247.119
13_Peptide-MeOH_1.10	5.81023	13_Peptide-MeOH_1.10	-363.786	-248.19	-115.586	-248.19	-115.586		5.82327	5.80215	5.81271	0.021126		-363.778	-248.185	-115.584	-248.185	-115.584		5.83668	5.78278	5.80973	0.0538968		13_Peptide-MeOH_1.10	-363.796	-248.195	-115.593	-248.195	-115.593		5.22981	5.20951	5.21966	0.0203061			13_Peptide-MeOH_1.10	-362.229	-247.122	-115.102	-247.122	-115.102		13_Peptide-MeOH_1.10.out:	-362.225	-247.119	-115.1	-247.119
13_Peptide-MeOH_1.25	4.6463	13_Peptide-MeOH_1.25	-363.784	-248.19	-115.586	-248.19	-115.586		4.64588	4.62946	4.63767	0.0164264		-363.776	-248.185	-115.584	-248.185	-115.584		4.65515	4.61497	4.63506	0.0401872		13_Peptide-MeOH_1.25	-363.794	-248.195	-115.593	-248.195	-115.593		4.27392	4.25828	4.2661	0.0156407			13_Peptide-MeOH_1.25	-362.229	-247.122	-115.102	-247.122	-115.102		13_Peptide-MeOH_1.25.out:	-362.225	-247.119	-115.1	-247.119
13_Peptide-MeOH_1.50	2.96981	13_Peptide-MeOH_1.50	-363.781	-248.19	-115.586	-248.19	-115.586		2.97292	2.96232	2.96762	0.0106066		-363.774	-248.185	-115.584	-248.185	-115.584		2.97831	2.95334	2.96583	0.0249779		13_Peptide-MeOH_1.50	-363.792	-248.195	-115.593	-248.195	-115.593		2.79291	2.78294	2.78792	0.00996775			13_Peptide-MeOH_1.50	-362.227	-247.122	-115.102	-247.122	-115.102		13_Peptide-MeOH_1.50.out:	-362.223	-247.119	-115.1	-247.119
13_Peptide-MeOH_2.00	1.31493	13_Peptide-MeOH_2.00	-363.779	-248.19	-115.586	-248.19	-115.586		1.32133	1.31696	1.31914	0.0043722		-363.771	-248.185	-115.584	-248.185	-115.584		1.32336	1.31358	1.31847	0.00977958		13_Peptide-MeOH_2.00	-363.789	-248.195	-115.593	-248.195	-115.593		1.27142	1.26738	1.2694	0.00403678			13_Peptide-MeOH_2.00	-362.225	-247.122	-115.102	-247.122	-115.102		13_Peptide-MeOH_2.00.out:	-362.221	-247.119	-115.1	-247.119
14_Peptide-MeNH2_0.90	6.93822	14_Peptide-MeNH2_0.90	-343.917	-248.19	-95.715	-248.19	-95.715		7.2658	7.23823	7.25202	0.0275731		-343.91	-248.185	-95.7132	-248.185	-95.7131		7.29636	7.20897	7.25266	0.0873924		14_Peptide-MeNH2_0.90	-343.928	-248.194	-95.7246	-248.194	-95.7245		5.84294	5.81596	5.82945	0.0269805			14_Peptide-MeNH2_0.90	-342.387	-247.122	-95.2629	-247.122	-95.2628		14_Peptide-MeNH2_0.90.out:	-342.383	-247.119	-95.2617	-247.119
14_Peptide-MeNH2_0.95	7.44608	14_Peptide-MeNH2_0.95	-343.917	-248.19	-95.715	-248.19	-95.715		7.67398	7.64838	7.66118	0.0256027		-343.91	-248.185	-95.7132	-248.185	-95.7131		7.70249	7.62308	7.66278	0.0794147		14_Peptide-MeNH2_0.95	-343.929	-248.194	-95.7246	-248.194	-95.7245		6.46423	6.43924	6.45173	0.0249834			14_Peptide-MeNH2_0.95	-342.389	-247.122	-95.2629	-247.122	-95.2628		14_Peptide-MeNH2_0.95.out:	-342.385	-247.119	-95.2617	-247.119
14_Peptide-MeNH2_1.00	7.53646	14_Peptide-MeNH2_1.00	-343.917	-248.19	-95.715	-248.19	-95.715		7.69213	7.66832	7.68022	0.0238101		-343.91	-248.185	-95.7131	-248.185	-95.7131		7.71839	7.64621	7.6823	0.0721748		14_Peptide-MeNH2_1.00	-343.929	-248.194	-95.7246	-248.194	-95.7245		6.66288	6.63972	6.6513	0.0231666			14_Peptide-MeNH2_1.00	-342.39	-247.122	-95.2629	-247.122	-95.2628		14_Peptide-MeNH2_1.00.out:	-342.386	-247.119	-95.2617	-247.119
14_Peptide-MeNH2_1.05	7.35958	14_Peptide-MeNH2_1.05	-343.917	-248.19	-95.715	-248.19	-95.715		7.46405	7.44194	7.453	0.0221168		-343.91	-248.185	-95.7131	-248.185	-95.7131		7.48805	7.42242	7.45523	0.0656346		14_Peptide-MeNH2_1.05	-343.929	-248.194	-95.7246	-248.194	-95.7245		6.58782	6.56637	6.57709	0.0214502			14_Peptide-MeNH2_1.05	-342.391	-247.122	-95.2629	-247.122	-95.2628		14_Peptide-MeNH2_1.05.out:	-342.387	-247.119	-95.2617	-247.119
14_Peptide-MeNH2_1.10	7.0205	14_Peptide-MeNH2_1.10	-343.916	-248.19	-95.715	-248.19	-95.715		7.08957	7.0691	7.07933	0.0204699		-343.909	-248.185	-95.7131	-248.185	-95.7131		7.11139	7.05162	7.0815	0.0597663		14_Peptide-MeNH2_1.10	-343.929	-248.194	-95.7246	-248.194	-95.7245		6.3425	6.32271	6.3326	0.0197869			14_Peptide-MeNH2_1.10	-342.391	-247.122	-95.2629	-247.122	-95.2628		14_Peptide-MeNH2_1.10.out:	-342.387	-247.119	-95.2617	-247.119
14_Peptide-MeNH2_1.25	5.63893	14_Peptide-MeNH2_1.25	-343.914	-248.19	-95.715	-248.19	-95.715		5.65857	5.64244	5.65051	0.0161304		-343.907	-248.185	-95.7131	-248.185	-95.7131		5.67494	5.6295	5.65222	0.0454402		14_Peptide-MeNH2_1.25	-343.927	-248.194	-95.7246	-248.194	-95.7245		5.19064	5.17521	5.18293	0.0154352			14_Peptide-MeNH2_1.25	-342.391	-247.122	-95.2629	-247.122	-95.2628		14_Peptide-MeNH2_1.25.out:	-342.387	-247.119	-95.2617	-247.119
14_Peptide-MeNH2_1.50	3.56734	14_Peptide-MeNH2_1.50	-343.911	-248.19	-95.715	-248.19	-95.715		3.57585	3.565	3.57042	0.0108511		-343.904	-248.185	-95.7131	-248.185	-95.7131		3.58702	3.55703	3.57203	0.0299954		14_Peptide-MeNH2_1.50	-343.924	-248.194	-95.7246	-248.194	-95.7245		3.35167	3.34145	3.34656	0.0102162			14_Peptide-MeNH2_1.50	-342.389	-247.122	-95.2628	-247.122	-95.2628		14_Peptide-MeNH2_1.50.out:	-342.385	-247.119	-95.2617	-247.119
14_Peptide-MeNH2_2.00	1.49832	14_Peptide-MeNH2_2.00	-343.908	-248.19	-95.715	-248.19	-95.715		1.51093	1.50575	1.50834	0.00518549		-343.901	-248.185	-95.7131	-248.185	-95.7131		1.51756	1.50308	1.51032	0.0144771		14_Peptide-MeNH2_2.00	-343.921	-248.194	-95.7245	-248.194	-95.7245		1.44962	1.44487	1.44724	0.00475431			14_Peptide-MeNH2_2.00	-342.387	-247.122	-95.2628	-247.122	-95.2628		14_Peptide-MeNH2_2.00.out:	-342.383	-247.119	-95.2617	-247.119
15_Peptide-Peptide_0.90	8.20422	15_Peptide-Peptide_0.90	-496.393	-248.19	-248.19	-248.19	-248.19		8.24059	8.19483	8.21771	0.0457623		-496.383	-248.185	-248.185	-248.185	-248.185		8.27988	8.15735	8.21862	0.122528		15_Peptide-Peptide_0.90	-496.399	-248.194	-248.194	-248.194	-248.194		6.74133	6.69747	6.7194	0.0438652			15_Peptide-Peptide_0.90	-494.247	-247.121	-247.122	-247.121	-247.122		15_Peptide-Peptide_0.90.out:	-494.242	-247.118	-247.119	-247.118
15_Peptide-Peptide_0.95	8.69565	15_Peptide-Peptide_0.95	-496.394	-248.19	-248.19	-248.19	-248.19		8.67091	8.62788	8.64939	0.043034		-496.384	-248.185	-248.185	-248.185	-248.185		8.70693	8.59478	8.65086	0.112152		15_Peptide-Peptide_0.95	-496.4	-248.194	-248.194	-248.194	-248.194		7.37924	7.33813	7.35869	0.0411118			15_Peptide-Peptide_0.95	-494.249	-247.121	-247.122	-247.121	-247.122		15_Peptide-Peptide_0.95.out:	-494.244	-247.118	-247.119	-247.118
15_Peptide-Peptide_1.00	8.76729	15_Peptide-Peptide_1.00	-496.394	-248.19	-248.19	-248.19	-248.19		8.70203	8.66176	8.6819	0.040268		-496.384	-248.185	-248.185	-248.185	-248.185		8.73454	8.63197	8.68325	0.102569		15_Peptide-Peptide_1.00	-496.4	-248.194	-248.194	-248.194	-248.194		7.58726	7.54892	7.56809	0.0383366			15_Peptide-Peptide_1.00	-494.25	-247.121	-247.122	-247.121	-247.122		15_Peptide-Peptide_1.00.out:	-494.245	-247.118	-247.119	-247.118
15_Peptide-Peptide_1.05	8.56864	15_Peptide-Peptide_1.05	-496.394	-248.19	-248.19	-248.19	-248.19		8.47888	8.44117	8.46003	0.0377078		-496.384	-248.185	-248.185	-248.185	-248.185		8.50787	8.41401	8.46094	0.0938577		15_Peptide-Peptide_1.05	-496.4	-248.194	-248.194	-248.194	-248.194		7.51524	7.47947	7.49736	0.0357745			15_Peptide-Peptide_1.05	-494.251	-247.121	-247.122	-247.121	-247.122		15_Peptide-Peptide_1.05.out:	-494.245	-247.118	-247.119	-247.118
15_Peptide-Peptide_1.10	8.20436	15_Peptide-Peptide_1.10	-496.393	-248.19	-248.19	-248.19	-248.19		8.10187	8.06655	8.08421	0.0353135		-496.383	-248.185	-248.185	-248.185	-248.185		8.12758	8.04158	8.08458	0.085994		15_Peptide-Peptide_1.10	-496.4	-248.194	-248.194	-248.194	-248.194		7.26704	7.23365	7.25035	0.0333878			15_Peptide-Peptide_1.10	-494.251	-247.121	-247.122	-247.121	-247.122		15_Peptide-Peptide_1.10.out:	-494.245	-247.118	-247.119	-247.118
15_Peptide-Peptide_1.25	6.72825	15_Peptide-Peptide_1.25	-496.391	-248.19	-248.19	-248.19	-248.19		6.62525	6.59647	6.61086	0.0287762		-496.381	-248.185	-248.185	-248.185	-248.185		6.64125	6.57527	6.60826	0.0659763		15_Peptide-Peptide_1.25	-496.398	-248.194	-248.194	-248.194	-248.194		6.07549	6.04853	6.06201	0.026967			15_Peptide-Peptide_1.25	-494.25	-247.121	-247.122	-247.121	-247.122		15_Peptide-Peptide_1.25.out:	-494.245	-247.118	-247.119	-247.118
15_Peptide-Peptide_1.50	4.45655	15_Peptide-Peptide_1.50	-496.387	-248.19	-248.19	-248.19	-248.19		4.3871	4.36772	4.37741	0.0193777		-496.377	-248.185	-248.185	-248.185	-248.185		4.39544	4.35341	4.37443	0.0420338		15_Peptide-Peptide_1.50	-496.395	-248.194	-248.194	-248.194	-248.194		4.10208	4.08413	4.09311	0.01795			15_Peptide-Peptide_1.50	-494.248	-247.121	-247.122	-247.121	-247.122		15_Peptide-Peptide_1.50.out:	-494.243	-247.118	-247.119	-247.118
15_Peptide-Peptide_2.00	1.7925	15_Peptide-Peptide_2.00	-496.383	-248.19	-248.19	-248.19	-248.19		1.76844	1.76223	1.76534	0.00621228		-496.373	-248.185	-248.185	-248.185	-248.185		1.77125	1.75724	1.76424	0.0140195		15_Peptide-Peptide_2.00	-496.391	-248.194	-248.194	-248.194	-248.194		1.69784	1.6921	1.69497	0.00573789			15_Peptide-Peptide_2.00	-494.245	-247.121	-247.122	-247.121	-247.122		15_Peptide-Peptide_2.00.out:	-494.24	-247.118	-247.119	-247.118
16_Peptide-Water_0.90	4.80144	16_Peptide-Water_0.90	-324.565	-248.19	-76.3675	-248.19	-76.3675		4.8191	4.78851	4.80381	0.0305877		-324.558	-248.185	-76.3655	-248.185	-76.3654		4.84892	4.76814	4.80853	0.0807821		16_Peptide-Water_0.90	-324.569	-248.194	-76.3685	-248.194	-76.3685		4.08677	4.05672	4.07174	0.0300531			16_Peptide-Water_0.90	-323.192	-247.122	-76.0671	-247.122	-76.0671		16_Peptide-Water_0.90.out:	-323.188	-247.119	-76.0661	-247.119
16_Peptide-Water_0.95	5.15	16_Peptide-Water_0.95	-324.566	-248.19	-76.3675	-248.19	-76.3675		5.13645	5.10796	5.12221	0.0284944		-324.559	-248.185	-76.3655	-248.185	-76.3654		5.16446	5.09063	5.12755	0.0738345		16_Peptide-Water_0.95	-324.57	-248.194	-76.3685	-248.194	-76.3685		4.53019	4.50227	4.51623	0.0279226			16_Peptide-Water_0.95	-323.194	-247.122	-76.0671	-247.122	-76.0671		16_Peptide-Water_0.95.out:	-323.19	-247.119	-76.0661	-247.119
16_Peptide-Water_1.00	5.19092	16_Peptide-Water_1.00	-324.566	-248.19	-76.3675	-248.19	-76.3675		5.16044	5.13392	5.14718	0.0265134		-324.559	-248.185	-76.3655	-248.185	-76.3654		5.18682	5.11898	5.1529	0.0678448		16_Peptide-Water_1.00	-324.57	-248.194	-76.3685	-248.194	-76.3685		4.65703	4.63112	4.64407	0.0259038			16_Peptide-Water_1.00	-323.194	-247.122	-76.0671	-247.122	-76.0671		16_Peptide-Water_1.00.out:	-323.19	-247.119	-76.0661	-247.119
16_Peptide-Water_1.05	5.04427	16_Peptide-Water_1.05	-324.566	-248.19	-76.3675	-248.19	-76.3675		5.00641	4.98177	4.99409	0.0246418		-324.559	-248.185	-76.3655	-248.185	-76.3654		5.0314	4.96869	5.00005	0.0627175		16_Peptide-Water_1.05	-324.57	-248.194	-76.3685	-248.194	-76.3685		4.58728	4.56329	4.57529	0.0239977			16_Peptide-Water_1.05	-323.194	-247.122	-76.0671	-247.122	-76.0671		16_Peptide-Water_1.05.out:	-323.191	-247.119	-76.0661	-247.119
16_Peptide-Water_1.10	4.79049	16_Peptide-Water_1.10	-324.565	-248.19	-76.3675	-248.19	-76.3675		4.75129	4.7284	4.73985	0.0228967		-324.558	-248.185	-76.3655	-248.185	-76.3654		4.77501	4.7168	4.74591	0.058212		16_Peptide-Water_1.10	-324.57	-248.194	-76.3685	-248.194	-76.3685		4.40116	4.37893	4.39005	0.0222256			16_Peptide-Water_1.10	-323.194	-247.122	-76.0671	-247.122	-76.0671		16_Peptide-Water_1.10.out:	-323.191	-247.119	-76.0661	-247.119
16_Peptide-Water_1.25	3.82538	16_Peptide-Water_1.25	-324.564	-248.19	-76.3675	-248.19	-76.3675		3.79685	3.77847	3.78766	0.018377		-324.557	-248.185	-76.3655	-248.185	-76.3654		3.81713	3.77002	3.79357	0.0471116		16_Peptide-Water_1.25	-324.568	-248.194	-76.3685	-248.194	-76.3685		3.58862	3.57095	3.57979	0.0176717			16_Peptide-Water_1.25	-323.194	-247.122	-76.0671	-247.122	-76.0671		16_Peptide-Water_1.25.out:	-323.19	-247.119	-76.0661	-247.119
16_Peptide-Water_1.50	2.46807	16_Peptide-Water_1.50	-324.562	-248.19	-76.3675	-248.19	-76.3675		2.45888	2.44606	2.45247	0.0128197		-324.555	-248.185	-76.3655	-248.185	-76.3654		2.47464	2.44099	2.45782	0.0336571		16_Peptide-Water_1.50	-324.566	-248.194	-76.3685	-248.194	-76.3685		2.36563	2.35347	2.35955	0.012153			16_Peptide-Water_1.50	-323.192	-247.122	-76.0671	-247.122	-76.0671		16_Peptide-Water_1.50.out:	-323.188	-247.119	-76.0661	-247.119
16_Peptide-Water_2.00	1.13891	16_Peptide-Water_2.00	-324.56	-248.19	-76.3675	-248.19	-76.3675		1.14303	1.1366	1.13981	0.00642158		-324.552	-248.185	-76.3654	-248.185	-76.3654		1.15245	1.13452	1.14348	0.0179297		16_Peptide-Water_2.00	-324.564	-248.194	-76.3685	-248.194	-76.3685		1.12043	1.11447	1.11745	0.00596022			16_Peptide-Water_2.00	-323.191	-247.122	-76.0671	-247.122	-76.0671		16_Peptide-Water_2.00.out:	-323.187	-247.119	-76.0661	-247.119
17_Uracil-Uracil_BP_0.90	16.2292	17_Uracil-Uracil_BP_0.90	-828.664	-414.319	-414.319	-414.319	-414.319		16.0776	15.9914	16.0345	0.086264		-828.647	-414.311	-414.311	-414.311	-414.311		16.1342	15.9283	16.0312	0.205915		17_Uracil-Uracil_BP_0.90	-828.618	-414.298	-414.298	-414.298	-414.298		13.5758	13.4932	13.5345	0.0826227			17_Uracil-Uracil_BP_0.90	-825.324	-412.654	-412.654	-412.654	-412.654		17_Uracil-Uracil_BP_0.90.out:	-825.315	-412.649	-412.65	-412.649
17_Uracil-Uracil_BP_0.95	17.3585	17_Uracil-Uracil_BP_0.95	-828.665	-414.319	-414.319	-414.319	-414.319		17.0992	17.0177	17.0584	0.0814982		-828.649	-414.311	-414.311	-414.311	-414.311		17.1535	16.9639	17.0587	0.189601		17_Uracil-Uracil_BP_0.95	-828.62	-414.298	-414.298	-414.298	-414.298		14.9546	14.8767	14.9156	0.0778605			17_Uracil-Uracil_BP_0.95	-825.327	-412.654	-412.654	-412.654	-412.654		17_Uracil-Uracil_BP_0.95.out:	-825.318	-412.649	-412.65	-412.649
17_Uracil-Uracil_BP_1.00	17.583	17_Uracil-Uracil_BP_1.00	-828.665	-414.319	-414.319	-414.319	-414.319		17.2511	17.1742	17.2127	0.0768656		-828.649	-414.311	-414.311	-414.311	-414.311		17.3015	17.1273	17.2144	0.17421		17_Uracil-Uracil_BP_1.00	-828.621	-414.298	-414.298	-414.298	-414.298		15.4118	15.3386	15.3752	0.0732533			17_Uracil-Uracil_BP_1.00	-825.329	-412.654	-412.654	-412.654	-412.654		17_Uracil-Uracil_BP_1.00.out:	-825.32	-412.649	-412.65	-412.649
17_Uracil-Uracil_BP_1.05	17.2136	17_Uracil-Uracil_BP_1.05	-828.665	-414.319	-414.319	-414.319	-414.319		16.8392	16.7664	16.8028	0.0728886		-828.648	-414.311	-414.311	-414.311	-414.311		16.8845	16.7248	16.8047	0.159667		17_Uracil-Uracil_BP_1.05	-828.621	-414.298	-414.298	-414.298	-414.298		15.2607	15.1914	15.226	0.0693148			17_Uracil-Uracil_BP_1.05	-825.329	-412.654	-412.654	-412.654	-412.654		17_Uracil-Uracil_BP_1.05.out:	-825.32	-412.649	-412.65	-412.649
17_Uracil-Uracil_BP_1.10	16.4732	17_Uracil-Uracil_BP_1.10	-828.664	-414.319	-414.319	-414.319	-414.319		16.0792	16.0108	16.045	0.0683903		-828.647	-414.311	-414.311	-414.311	-414.311		16.1188	15.9726	16.0457	0.146188		17_Uracil-Uracil_BP_1.10	-828.62	-414.298	-414.298	-414.298	-414.298		14.7217	14.6568	14.6892	0.0648851			17_Uracil-Uracil_BP_1.10	-825.329	-412.654	-412.654	-412.654	-412.654		17_Uracil-Uracil_BP_1.10.out:	-825.32	-412.649	-412.65	-412.649
17_Uracil-Uracil_BP_1.25	13.3496	17_Uracil-Uracil_BP_1.25	-828.659	-414.319	-414.319	-414.319	-414.319		12.9817	12.9254	12.9536	0.0562811		-828.642	-414.311	-414.311	-414.311	-414.311		13.0055	12.8933	12.9494	0.112186		17_Uracil-Uracil_BP_1.25	-828.616	-414.298	-414.298	-414.298	-414.298		12.1052	12.0521	12.0786	0.053036			17_Uracil-Uracil_BP_1.25	-825.326	-412.654	-412.654	-412.654	-412.654		17_Uracil-Uracil_BP_1.25.out:	-825.317	-412.649	-412.65	-412.649
17_Uracil-Uracil_BP_1.50	8.46175	17_Uracil-Uracil_BP_1.50	-828.651	-414.319	-414.319	-414.319	-414.319		8.21356	8.17416	8.19386	0.0393923		-828.634	-414.311	-414.311	-414.311	-414.311		8.21948	8.14868	8.18408	0.0708009		17_Uracil-Uracil_BP_1.50	-828.609	-414.298	-414.298	-414.298	-414.298		7.76474	7.72793	7.74633	0.0368131			17_Uracil-Uracil_BP_1.50	-825.32	-412.654	-412.654	-412.654	-412.654		17_Uracil-Uracil_BP_1.50.out:	-825.311	-412.649	-412.65	-412.649
17_Uracil-Uracil_BP_2.00	3.38004	17_Uracil-Uracil_BP_2.00	-828.643	-414.319	-414.319	-414.319	-414.319		3.27514	3.25999	3.26757	0.0151529		-828.626	-414.311	-414.311	-414.311	-414.311		3.27442	3.24784	3.26113	0.0265783		17_Uracil-Uracil_BP_2.00	-828.602	-414.298	-414.298	-414.298	-414.298		3.12878	3.11473	3.12175	0.0140532			17_Uracil-Uracil_BP_2.00	-825.313	-412.654	-412.654	-412.654	-412.654		17_Uracil-Uracil_BP_2.00.out:	-825.304	-412.649	-412.65	-412.649
18_Water-Pyridine_0.90	6.52673	18_Water-Pyridine_0.90	-324.271	-76.3674	-247.893	-76.3673	-247.893		6.75842	6.72897	6.74369	0.0294505		-324.264	-76.3654	-247.888	-76.3653	-247.888		6.79355	6.69946	6.74651	0.0940885		18_Water-Pyridine_0.90	-324.262	-76.3684	-247.884	-76.3683	-247.884		5.87244	5.84297	5.8577	0.0294709			18_Water-Pyridine_0.90	-322.868	-76.0666	-246.796	-76.0666	-246.796		18_Water-Pyridine_0.90.out:	-322.864	-76.0656	-246.794	-76.0655
18_Water-Pyridine_0.95	6.91751	18_Water-Pyridine_0.95	-324.271	-76.3674	-247.893	-76.3673	-247.893		7.08359	7.05644	7.07001	0.0271477		-324.265	-76.3654	-247.888	-76.3653	-247.888		7.11662	7.03095	7.07379	0.0856695		18_Water-Pyridine_0.95	-324.263	-76.3684	-247.884	-76.3683	-247.884		6.33708	6.30995	6.32352	0.0271268			18_Water-Pyridine_0.95	-322.869	-76.0666	-246.796	-76.0666	-246.796		18_Water-Pyridine_0.95.out:	-322.866	-76.0655	-246.794	-76.0655
18_Water-Pyridine_1.00	6.92808	18_Water-Pyridine_1.00	-324.271	-76.3674	-247.893	-76.3673	-247.893		7.04673	7.02172	7.03423	0.0250035		-324.265	-76.3654	-247.888	-76.3653	-247.888		7.07714	6.99944	7.03829	0.0777057		18_Water-Pyridine_1.00	-324.263	-76.3684	-247.884	-76.3683	-247.884		6.41834	6.39339	6.40587	0.0249494			18_Water-Pyridine_1.00	-322.87	-76.0666	-246.796	-76.0666	-246.796		18_Water-Pyridine_1.00.out:	-322.866	-76.0655	-246.794	-76.0655
18_Water-Pyridine_1.05	6.70133	18_Water-Pyridine_1.05	-324.271	-76.3674	-247.893	-76.3673	-247.893		6.78683	6.76384	6.77533	0.0229887		-324.264	-76.3653	-247.888	-76.3653	-247.888		6.8144	6.74415	6.77927	0.0702514		18_Water-Pyridine_1.05	-324.263	-76.3683	-247.884	-76.3683	-247.884		6.2582	6.2353	6.24675	0.0229064			18_Water-Pyridine_1.05	-322.87	-76.0666	-246.796	-76.0666	-246.796		18_Water-Pyridine_1.05.out:	-322.867	-76.0655	-246.794	-76.0655
18_Water-Pyridine_1.10	6.33583	18_Water-Pyridine_1.10	-324.27	-76.3674	-247.893	-76.3673	-247.893		6.39909	6.378	6.38854	0.0210941		-324.264	-76.3653	-247.888	-76.3653	-247.888		6.42379	6.36041	6.3921	0.0633829		18_Water-Pyridine_1.10	-324.262	-76.3683	-247.884	-76.3683	-247.884		5.95411	5.93312	5.94361	0.020989			18_Water-Pyridine_1.10	-322.87	-76.0666	-246.796	-76.0666	-246.796		18_Water-Pyridine_1.10.out:	-322.867	-76.0655	-246.794	-76.0655
18_Water-Pyridine_1.25	4.96488	18_Water-Pyridine_1.25	-324.268	-76.3674	-247.893	-76.3673	-247.893		4.99964	4.98357	4.99161	0.0160714		-324.262	-76.3653	-247.888	-76.3653	-247.888		5.01629	4.97037	4.99333	0.0459218		18_Water-Pyridine_1.25	-324.26	-76.3683	-247.884	-76.3683	-247.884		4.73193	4.71601	4.72397	0.0159273			18_Water-Pyridine_1.25	-322.869	-76.0666	-246.796	-76.0666	-246.796		18_Water-Pyridine_1.25.out:	-322.865	-76.0655	-246.794	-76.0655
18_Water-Pyridine_1.50	3.02649	18_Water-Pyridine_1.50	-324.265	-76.3673	-247.893	-76.3673	-247.893		3.05533	3.04567	3.0505	0.00965493		-324.258	-76.3653	-247.888	-76.3653	-247.888		3.06403	3.03734	3.05068	0.0266853		18_Water-Pyridine_1.50	-324.257	-76.3683	-247.884	-76.3683	-247.884		2.93478	2.92528	2.93003	0.00950172			18_Water-Pyridine_1.50	-322.867	-76.0666	-246.796	-76.0666	-246.796		18_Water-Pyridine_1.50.out:	-322.863	-76.0655	-246.794	-76.0655
18_Water-Pyridine_2.00	1.19491	18_Water-Pyridine_2.00	-324.262	-76.3673	-247.893	-76.3673	-247.893		1.21678	1.2139	1.21534	0.00288386		-324.255	-76.3653	-247.888	-76.3653	-247.888		1.22078	1.21111	1.21595	0.00966816		18_Water-Pyridine_2.00	-324.255	-76.3683	-247.884	-76.3683	-247.884		1.18615	1.18333	1.18474	0.00282679			18_Water-Pyridine_2.00	-322.864	-76.0666	-246.796	-76.0666	-246.796		18_Water-Pyridine_2.00.out:	-322.861	-76.0655	-246.794	-76.0655
19_MeOH-Pyridine_0.90	6.94443	19_MeOH-Pyridine_0.90	-363.49	-115.586	-247.893	-115.586	-247.893		7.25797	7.22939	7.24368	0.0285861		-363.483	-115.583	-247.888	-115.583	-247.888		7.28292	7.19698	7.23995	0.0859329		19_MeOH-Pyridine_0.90	-363.487	-115.592	-247.884	-115.592	-247.884		6.08071	6.05211	6.06641	0.0285959			19_MeOH-Pyridine_0.90	-361.901	-115.101	-246.796	-115.101	-246.796		19_MeOH-Pyridine_0.90.out:	-361.897	-115.099	-246.794	-115.099
19_MeOH-Pyridine_0.95	7.44547	19_MeOH-Pyridine_0.95	-363.491	-115.586	-247.893	-115.586	-247.893		7.6712	7.64494	7.65807	0.0262667		-363.484	-115.583	-247.888	-115.583	-247.888		7.69373	7.6167	7.65522	0.0770299		19_MeOH-Pyridine_0.95	-363.487	-115.592	-247.884	-115.592	-247.884		6.66934	6.64311	6.65622	0.0262341			19_MeOH-Pyridine_0.95	-361.903	-115.101	-246.796	-115.101	-246.796		19_MeOH-Pyridine_0.95.out:	-361.899	-115.099	-246.794	-115.099
19_MeOH-Pyridine_1.00	7.52025	19_MeOH-Pyridine_1.00	-363.491	-115.586	-247.893	-115.586	-247.893		7.68054	7.65641	7.66848	0.02413		-363.484	-115.583	-247.888	-115.583	-247.888		7.70021	7.63149	7.66585	0.0687238		19_MeOH-Pyridine_1.00	-363.488	-115.592	-247.884	-115.592	-247.884		6.82848	6.80442	6.81645	0.0240636			19_MeOH-Pyridine_1.00	-361.904	-115.101	-246.796	-115.101	-246.796		19_MeOH-Pyridine_1.00.out:	-361.9	-115.099	-246.794	-115.099
19_MeOH-Pyridine_1.05	7.32365	19_MeOH-Pyridine_1.05	-363.49	-115.586	-247.893	-115.586	-247.893		7.43661	7.41447	7.42554	0.022137		-363.483	-115.583	-247.888	-115.583	-247.888		7.45328	7.39222	7.42275	0.0610531		19_MeOH-Pyridine_1.05	-363.488	-115.592	-247.884	-115.592	-247.884		6.71222	6.69017	6.70119	0.0220427			19_MeOH-Pyridine_1.05	-361.904	-115.101	-246.796	-115.101	-246.796		19_MeOH-Pyridine_1.05.out:	-361.9	-115.099	-246.794	-115.099
19_MeOH-Pyridine_1.10	6.96348	19_MeOH-Pyridine_1.10	-363.49	-115.586	-247.893	-115.586	-247.893		7.04341	7.02315	7.03328	0.0202609		-363.483	-115.583	-247.888	-115.583	-247.888		7.05718	7.00306	7.03012	0.0541151		19_MeOH-Pyridine_1.10	-363.487	-115.592	-247.884	-115.592	-247.884		6.42706	6.40691	6.41699	0.0201448			19_MeOH-Pyridine_1.10	-361.904	-115.101	-246.796	-115.101	-246.796		19_MeOH-Pyridine_1.10.out:	-361.9	-115.099	-246.794	-115.099
19_MeOH-Pyridine_1.25	5.52459	19_MeOH-Pyridine_1.25	-363.487	-115.586	-247.893	-115.586	-247.893		5.55885	5.54352	5.55119	0.0153257		-363.48	-115.583	-247.888	-115.583	-247.888		5.56515	5.52794	5.54654	0.0372061		19_MeOH-Pyridine_1.25	-363.485	-115.592	-247.884	-115.592	-247.884		5.17578	5.1606	5.16819	0.0151775			19_MeOH-Pyridine_1.25	-361.903	-115.101	-246.796	-115.101	-246.796		19_MeOH-Pyridine_1.25.out:	-361.899	-115.099	-246.794	-115.099
19_MeOH-Pyridine_1.50	3.40319	19_MeOH-Pyridine_1.50	-363.484	-115.586	-247.893	-115.586	-247.893		3.42719	3.41796	3.42257	0.00922839		-363.477	-115.583	-247.888	-115.583	-247.888		3.42769	3.40733	3.41751	0.0203638		19_MeOH-Pyridine_1.50	-363.482	-115.592	-247.884	-115.592	-247.884		3.24517	3.23608	3.24063	0.0090887			19_MeOH-Pyridine_1.50	-361.901	-115.101	-246.796	-115.101	-246.796		19_MeOH-Pyridine_1.50.out:	-361.897	-115.099	-246.794	-115.099
19_MeOH-Pyridine_2.00	1.34347	19_MeOH-Pyridine_2.00	-363.481	-115.586	-247.893	-115.586	-247.893		1.36494	1.36196	1.36345	0.00298585		-363.474	-115.583	-247.888	-115.583	-247.888		1.36516	1.35785	1.3615	0.00730958		19_MeOH-Pyridine_2.00	-363.479	-115.592	-247.884	-115.592	-247.884		1.31389	1.31101	1.31245	0.00288308			19_MeOH-Pyridine_2.00	-361.899	-115.101	-246.796	-115.101	-246.796		19_MeOH-Pyridine_2.00.out:	-361.895	-115.099	-246.794	-115.099
20_AcOH-AcOH_0.90	17.9699	20_AcOH-AcOH_0.90	-457.69	-228.831	-228.831	-228.831	-228.831		17.7074	17.6265	17.6669	0.0809122		-457.68	-228.826	-228.826	-228.826	-228.826		17.7558	17.5569	17.6563	0.198843		20_AcOH-AcOH_0.90	-457.682	-228.828	-228.828	-228.828	-228.828		15.519	15.4408	15.4799	0.0781672			20_AcOH-AcOH_0.90	-455.862	-227.921	-227.921	-227.921	-227.921		20_AcOH-AcOH_0.90.out:	-455.857	-227.918	-227.918	-227.918
20_AcOH-AcOH_0.95	19.2277	20_AcOH-AcOH_0.95	-457.692	-228.831	-228.831	-228.831	-228.831		18.9003	18.8239	18.8621	0.0764513		-457.681	-228.826	-228.826	-228.826	-228.826		18.9508	18.767	18.8589	0.183787		20_AcOH-AcOH_0.95	-457.684	-228.828	-228.828	-228.828	-228.828		17.0061	16.9325	16.9693	0.0736405			20_AcOH-AcOH_0.95	-455.865	-227.921	-227.921	-227.921	-227.921		20_AcOH-AcOH_0.95.out:	-455.86	-227.918	-227.918	-227.918
20_AcOH-AcOH_1.00	19.4687	20_AcOH-AcOH_1.00	-457.692	-228.831	-228.831	-228.831	-228.831		19.0951	19.0228	19.059	0.0722363		-457.682	-228.826	-228.826	-228.826	-228.826		19.1449	18.9753	19.0601	0.169579		20_AcOH-AcOH_1.00	-457.685	-228.828	-228.828	-228.828	-228.828		17.4604	17.391	17.4257	0.0694024			20_AcOH-AcOH_1.00	-455.867	-227.921	-227.921	-227.921	-227.921		20_AcOH-AcOH_1.00.out:	-455.861	-227.918	-227.918	-227.918
20_AcOH-AcOH_1.05	19.0493	20_AcOH-AcOH_1.05	-457.691	-228.831	-228.831	-228.831	-228.831		18.6483	18.5801	18.6142	0.0682629		-457.681	-228.826	-228.826	-228.826	-228.826		18.6963	18.5404	18.6184	0.155938		20_AcOH-AcOH_1.05	-457.684	-228.828	-228.828	-228.828	-228.828		17.2409	17.1755	17.2082	0.0654352			20_AcOH-AcOH_1.05	-455.867	-227.921	-227.921	-227.921	-227.921		20_AcOH-AcOH_1.05.out:	-455.861	-227.918	-227.918	-227.918
20_AcOH-AcOH_1.10	18.2195	20_AcOH-AcOH_1.10	-457.69	-228.831	-228.831	-228.831	-228.831		17.808	17.7435	17.7757	0.0644856		-457.68	-228.826	-228.826	-228.826	-228.826		17.852	17.7092	17.7806	0.142825		20_AcOH-AcOH_1.10	-457.683	-228.828	-228.828	-228.828	-228.828		16.5971	16.5354	16.5663	0.0616845			20_AcOH-AcOH_1.10	-455.866	-227.921	-227.921	-227.921	-227.921		20_AcOH-AcOH_1.10.out:	-455.861	-227.918	-227.918	-227.918
20_AcOH-AcOH_1.25	14.7358	20_AcOH-AcOH_1.25	-457.684	-228.831	-228.831	-228.831	-228.831		14.3633	14.3093	14.3363	0.0539246		-457.674	-228.826	-228.826	-228.826	-228.826		14.3925	14.284	14.3383	0.108429		20_AcOH-AcOH_1.25	-457.678	-228.828	-228.828	-228.828	-228.828		13.5906	13.5393	13.5649	0.0512673			20_AcOH-AcOH_1.25	-455.862	-227.921	-227.921	-227.921	-227.921		20_AcOH-AcOH_1.25.out:	-455.857	-227.918	-227.918	-227.918
20_AcOH-AcOH_1.50	9.2885	20_AcOH-AcOH_1.50	-457.676	-228.831	-228.831	-228.831	-228.831		9.04891	9.01026	9.02958	0.0386569		-457.666	-228.826	-228.826	-228.826	-228.826		9.05849	8.98964	9.02407	0.0688468		20_AcOH-AcOH_1.50	-457.671	-228.828	-228.828	-228.828	-228.828		8.6713	8.63489	8.6531	0.0364095			20_AcOH-AcOH_1.50	-455.855	-227.921	-227.921	-227.921	-227.921		20_AcOH-AcOH_1.50.out:	-455.85	-227.918	-227.918	-227.918
20_AcOH-AcOH_2.00	3.61056	20_AcOH-AcOH_2.00	-457.667	-228.831	-228.831	-228.831	-228.831		3.5228	3.5085	3.51565	0.0142948		-457.657	-228.826	-228.826	-228.826	-228.826		3.52458	3.49883	3.5117	0.0257506		20_AcOH-AcOH_2.00	-457.662	-228.828	-228.828	-228.828	-228.828		3.41743	3.40412	3.41077	0.0133012			20_AcOH-AcOH_2.00	-455.847	-227.921	-227.921	-227.921	-227.921		20_AcOH-AcOH_2.00.out:	-455.842	-227.918	-227.918	-227.918
21_AcNH2-AcNH2_0.90	15.3351	21_AcNH2-AcNH2_0.90	-417.933	-208.954	-208.954	-208.954	-208.954		15.0778	14.9996	15.0387	0.0782073		-417.924	-208.95	-208.95	-208.95	-208.95		15.1294	14.9451	15.0373	0.184298		21_AcNH2-AcNH2_0.90	-417.931	-208.955	-208.955	-208.955	-208.955		13.1796	13.1051	13.1424	0.0744679			21_AcNH2-AcNH2_0.90	-416.17	-208.078	-208.078	-208.078	-208.078		21_AcNH2-AcNH2_0.90.out:	-416.166	-208.075	-208.075	-208.075
21_AcNH2-AcNH2_0.95	16.375	21_AcNH2-AcNH2_0.95	-417.934	-208.954	-208.954	-208.954	-208.954		16.0511	15.9773	16.0142	0.0737836		-417.926	-208.95	-208.95	-208.95	-208.95		16.1004	15.9318	16.0161	0.168576		21_AcNH2-AcNH2_0.95	-417.933	-208.955	-208.955	-208.955	-208.955		14.4433	14.3732	14.4082	0.0700701			21_AcNH2-AcNH2_0.95	-416.173	-208.078	-208.078	-208.078	-208.078		21_AcNH2-AcNH2_0.95.out:	-416.169	-208.075	-208.075	-208.075
21_AcNH2-AcNH2_1.00	16.5588	21_AcNH2-AcNH2_1.00	-417.935	-208.954	-208.954	-208.954	-208.954		16.1964	16.1268	16.1616	0.0696229		-417.926	-208.95	-208.95	-208.95	-208.95		16.2413	16.0875	16.1644	0.1538		21_AcNH2-AcNH2_1.00	-417.934	-208.955	-208.955	-208.955	-208.955		14.835	14.7691	14.8021	0.0659661			21_AcNH2-AcNH2_1.00	-416.175	-208.078	-208.078	-208.078	-208.078		21_AcNH2-AcNH2_1.00.out:	-416.17	-208.075	-208.075	-208.075
21_AcNH2-AcNH2_1.05	16.1883	21_AcNH2-AcNH2_1.05	-417.934	-208.954	-208.954	-208.954	-208.954		15.8108	15.7452	15.778	0.0655608		-417.925	-208.95	-208.95	-208.95	-208.95		15.8504	15.7104	15.7804	0.139962		21_AcNH2-AcNH2_1.05	-417.934	-208.955	-208.955	-208.955	-208.955		14.658	14.596	14.627	0.0619766			21_AcNH2-AcNH2_1.05	-416.175	-208.078	-208.078	-208.078	-208.078		21_AcNH2-AcNH2_1.05.out:	-416.171	-208.075	-208.075	-208.075
21_AcNH2-AcNH2_1.10	15.4764	21_AcNH2-AcNH2_1.10	-417.933	-208.954	-208.954	-208.954	-208.954		15.1012	15.0396	15.0704	0.0615494		-417.924	-208.95	-208.95	-208.95	-208.95		15.1352	15.008	15.0716	0.127266		21_AcNH2-AcNH2_1.10	-417.933	-208.955	-208.955	-208.955	-208.955		14.1238	14.0657	14.0947	0.0580444			21_AcNH2-AcNH2_1.10	-416.175	-208.078	-208.078	-208.078	-208.078		21_AcNH2-AcNH2_1.10.out:	-416.17	-208.075	-208.075	-208.075
21_AcNH2-AcNH2_1.25	12.5444	21_AcNH2-AcNH2_1.25	-417.928	-208.954	-208.954	-208.954	-208.954		12.2302	12.1806	12.2054	0.0496405		-417.92	-208.95	-208.95	-208.95	-208.95		12.2494	12.154	12.2017	0.0954183		21_AcNH2-AcNH2_1.25	-417.929	-208.955	-208.955	-208.955	-208.955		11.6279	11.5815	11.6047	0.0464483			21_AcNH2-AcNH2_1.25	-416.172	-208.078	-208.078	-208.078	-208.078		21_AcNH2-AcNH2_1.25.out:	-416.168	-208.075	-208.075	-208.075
21_AcNH2-AcNH2_1.50	8.05386	21_AcNH2-AcNH2_1.50	-417.921	-208.954	-208.954	-208.954	-208.954		7.86341	7.83077	7.84709	0.03264		-417.913	-208.95	-208.95	-208.95	-208.95		7.86616	7.80976	7.83796	0.0564075		21_AcNH2-AcNH2_1.50	-417.922	-208.955	-208.955	-208.955	-208.955		7.58221	7.55196	7.56709	0.0302508			21_AcNH2-AcNH2_1.50	-416.167	-208.078	-208.078	-208.078	-208.078		21_AcNH2-AcNH2_1.50.out:	-416.162	-208.075	-208.075	-208.075
21_AcNH2-AcNH2_2.00	3.01978	21_AcNH2-AcNH2_2.00	-417.914	-208.954	-208.954	-208.954	-208.954		2.95572	2.9477	2.95171	0.00801527		-417.905	-208.95	-208.95	-208.95	-208.95		2.95463	2.93943	2.94703	0.0152013		21_AcNH2-AcNH2_2.00	-417.915	-208.955	-208.955	-208.955	-208.955		2.89821	2.89088	2.89455	0.00733094			21_AcNH2-AcNH2_2.00	-416.16	-208.078	-208.078	-208.078	-208.078		21_AcNH2-AcNH2_2.00.out:	-416.155	-208.075	-208.075	-208.075
22_AcOH-Uracil_0.90	18.421	22_AcOH-Uracil_0.90	-643.179	-228.831	-414.319	-228.831	-414.319		18.1936	18.1115	18.1526	0.0820759		-643.165	-228.826	-414.311	-228.826	-414.31		18.2481	18.0464	18.1473	0.201679		22_AcOH-Uracil_0.90	-643.152	-228.828	-414.298	-228.828	-414.298		15.8626	15.7836	15.8231	0.0790697			22_AcOH-Uracil_0.90	-640.595	-227.921	-412.654	-227.921	-412.654		22_AcOH-Uracil_0.90.out:	-640.588	-227.918	-412.649	-227.918
22_AcOH-Uracil_0.95	19.6319	22_AcOH-Uracil_0.95	-643.18	-228.831	-414.319	-228.831	-414.319		19.3131	19.2354	19.2742	0.0776856		-643.167	-228.826	-414.311	-228.826	-414.31		19.3671	19.1808	19.274	0.186337		22_AcOH-Uracil_0.95	-643.154	-228.828	-414.298	-228.828	-414.298		17.3051	17.2305	17.2678	0.0746341			22_AcOH-Uracil_0.95	-640.598	-227.921	-412.654	-227.921	-412.654		22_AcOH-Uracil_0.95.out:	-640.591	-227.918	-412.649	-227.918
22_AcOH-Uracil_1.00	19.8775	22_AcOH-Uracil_1.00	-643.181	-228.831	-414.319	-228.831	-414.319		19.4944	19.4211	19.4577	0.0733024		-643.167	-228.826	-414.311	-228.826	-414.31		19.5462	19.3743	19.4603	0.171876		22_AcOH-Uracil_1.00	-643.155	-228.828	-414.298	-228.828	-414.298		17.7671	17.6969	17.732	0.0702531			22_AcOH-Uracil_1.00	-640.6	-227.921	-412.654	-227.921	-412.654		22_AcOH-Uracil_1.00.out:	-640.593	-227.918	-412.649	-227.918
22_AcOH-Uracil_1.05	19.4881	22_AcOH-Uracil_1.05	-643.18	-228.831	-414.319	-228.831	-414.319		19.0655	18.9963	19.0309	0.0691643		-643.166	-228.826	-414.311	-228.826	-414.31		19.1135	18.9554	19.0345	0.15806		22_AcOH-Uracil_1.05	-643.154	-228.828	-414.298	-228.828	-414.298		17.5812	17.5151	17.5482	0.0661375			22_AcOH-Uracil_1.05	-640.6	-227.921	-412.654	-227.921	-412.654		22_AcOH-Uracil_1.05.out:	-640.593	-227.918	-412.649	-227.918
22_AcOH-Uracil_1.10	18.6975	22_AcOH-Uracil_1.10	-643.179	-228.831	-414.319	-228.831	-414.319		18.2567	18.1913	18.224	0.0653754		-643.165	-228.826	-414.311	-228.826	-414.31		18.2999	18.155	18.2274	0.144927		22_AcOH-Uracil_1.10	-643.154	-228.828	-414.298	-228.828	-414.298		16.981	16.9186	16.9498	0.0623778			22_AcOH-Uracil_1.10	-640.6	-227.921	-412.654	-227.921	-412.654		22_AcOH-Uracil_1.10.out:	-640.592	-227.918	-412.649	-227.918
22_AcOH-Uracil_1.25	15.3249	22_AcOH-Uracil_1.25	-643.173	-228.831	-414.319	-228.831	-414.319		14.9117	14.857	14.8843	0.0546847		-643.16	-228.826	-414.31	-228.826	-414.31		14.9389	14.8278	14.8834	0.111085		22_AcOH-Uracil_1.25	-643.149	-228.828	-414.298	-228.828	-414.298		14.0965	14.0447	14.0706	0.0518349			22_AcOH-Uracil_1.25	-640.596	-227.921	-412.654	-227.921	-412.654		22_AcOH-Uracil_1.25.out:	-640.589	-227.918	-412.649	-227.918
22_AcOH-Uracil_1.50	9.95316	22_AcOH-Uracil_1.50	-643.165	-228.831	-414.319	-228.831	-414.319		9.66725	9.62812	9.64769	0.0391316		-643.151	-228.826	-414.31	-228.826	-414.31		9.67463	9.60375	9.63919	0.0708804		22_AcOH-Uracil_1.50	-643.141	-228.828	-414.298	-228.828	-414.298		9.26568	9.22892	9.2473	0.0367511			22_AcOH-Uracil_1.50	-640.589	-227.921	-412.654	-227.921	-412.654		22_AcOH-Uracil_1.50.out:	-640.582	-227.918	-412.649	-227.918
22_AcOH-Uracil_2.00	4.17934	22_AcOH-Uracil_2.00	-643.156	-228.831	-414.319	-228.831	-414.319		4.05212	4.03694	4.04453	0.0151846		-643.142	-228.826	-414.31	-228.826	-414.31		4.05167	4.02454	4.03811	0.0271336		22_AcOH-Uracil_2.00	-643.133	-228.828	-414.298	-228.828	-414.298		3.93799	3.92388	3.93093	0.0141156			22_AcOH-Uracil_2.00	-640.581	-227.921	-412.654	-227.921	-412.654		22_AcOH-Uracil_2.00.out:	-640.574	-227.918	-412.649	-227.918
23_AcNH2-Uracil_0.90	18.1824	23_AcNH2-Uracil_0.90	-623.302	-208.954	-414.319	-208.954	-414.319		17.981	17.8998	17.9404	0.0812278		-623.289	-208.95	-414.31	-208.95	-414.31		18.0355	17.8377	17.9366	0.197823		23_AcNH2-Uracil_0.90	-623.278	-208.955	-414.298	-208.955	-414.298		15.7142	15.6365	15.6753	0.0777528			23_AcNH2-Uracil_0.90	-620.751	-208.077	-412.653	-208.077	-412.653		23_AcNH2-Uracil_0.90.out:	-620.744	-208.075	-412.649	-208.075
23_AcNH2-Uracil_0.95	19.3101	23_AcNH2-Uracil_0.95	-623.303	-208.954	-414.319	-208.954	-414.319		19.0136	18.9366	18.9751	0.077003		-623.291	-208.95	-414.31	-208.95	-414.31		19.0657	18.8834	18.9745	0.182323		23_AcNH2-Uracil_0.95	-623.28	-208.955	-414.298	-208.955	-414.298		17.0662	16.9927	17.0295	0.0735085			23_AcNH2-Uracil_0.95	-620.754	-208.077	-412.653	-208.077	-412.653		23_AcNH2-Uracil_0.95.out:	-620.747	-208.075	-412.649	-208.075
23_AcNH2-Uracil_1.00	19.5567	23_AcNH2-Uracil_1.00	-623.304	-208.954	-414.319	-208.954	-414.319		19.1949	19.1218	19.1583	0.0730269		-623.291	-208.95	-414.31	-208.95	-414.31		19.2432	19.0755	19.1594	0.167696		23_AcNH2-Uracil_1.00	-623.281	-208.955	-414.298	-208.955	-414.298		17.5229	17.4534	17.4882	0.0695518			23_AcNH2-Uracil_1.00	-620.755	-208.077	-412.653	-208.077	-412.653		23_AcNH2-Uracil_1.00.out:	-620.748	-208.075	-412.649	-208.075
23_AcNH2-Uracil_1.05	19.2169	23_AcNH2-Uracil_1.05	-623.303	-208.954	-414.319	-208.954	-414.319		18.8151	18.7463	18.7807	0.0688407		-623.29	-208.95	-414.31	-208.95	-414.31		18.8587	18.7048	18.7817	0.153936		23_AcNH2-Uracil_1.05	-623.281	-208.955	-414.298	-208.955	-414.298		17.3801	17.3147	17.3474	0.0654118			23_AcNH2-Uracil_1.05	-620.756	-208.077	-412.653	-208.077	-412.653		23_AcNH2-Uracil_1.05.out:	-620.749	-208.075	-412.649	-208.075
23_AcNH2-Uracil_1.10	18.501	23_AcNH2-Uracil_1.10	-623.302	-208.954	-414.319	-208.954	-414.319		18.0807	18.0158	18.0483	0.0649187		-623.289	-208.95	-414.31	-208.95	-414.31		18.1191	17.9779	18.0485	0.141155		23_AcNH2-Uracil_1.10	-623.28	-208.955	-414.298	-208.955	-414.298		16.848	16.7864	16.8172	0.0615379			23_AcNH2-Uracil_1.10	-620.756	-208.077	-412.653	-208.077	-412.653		23_AcNH2-Uracil_1.10.out:	-620.749	-208.075	-412.649	-208.075
23_AcNH2-Uracil_1.25	15.3858	23_AcNH2-Uracil_1.25	-623.297	-208.954	-414.319	-208.954	-414.319		14.9891	14.935	14.962	0.0540915		-623.284	-208.95	-414.31	-208.95	-414.31		15.012	14.9033	14.9576	0.108644		23_AcNH2-Uracil_1.25	-623.276	-208.955	-414.298	-208.955	-414.298		14.2009	14.15	14.1754	0.0509226			23_AcNH2-Uracil_1.25	-620.753	-208.077	-412.653	-208.077	-412.653		23_AcNH2-Uracil_1.25.out:	-620.746	-208.075	-412.649	-208.075
23_AcNH2-Uracil_1.50	10.3196	23_AcNH2-Uracil_1.50	-623.289	-208.954	-414.319	-208.954	-414.319		10.0385	10.0004	10.0195	0.0381591		-623.276	-208.95	-414.31	-208.95	-414.31		10.0427	9.97428	10.0085	0.068405		23_AcNH2-Uracil_1.50	-623.268	-208.955	-414.298	-208.955	-414.298		9.6494	9.61379	9.63159	0.0356035			23_AcNH2-Uracil_1.50	-620.746	-208.077	-412.653	-208.077	-412.653		23_AcNH2-Uracil_1.50.out:	-620.739	-208.075	-412.649	-208.075
23_AcNH2-Uracil_2.00	4.69061	23_AcNH2-Uracil_2.00	-623.28	-208.954	-414.319	-208.954	-414.319		4.55668	4.54192	4.5493	0.014761		-623.267	-208.95	-414.31	-208.95	-414.31		4.55328	4.52823	4.54075	0.0250469		23_AcNH2-Uracil_2.00	-623.26	-208.955	-414.298	-208.955	-414.298		4.44695	4.43331	4.44013	0.0136385			23_AcNH2-Uracil_2.00	-620.739	-208.077	-412.653	-208.077	-412.653		23_AcNH2-Uracil_2.00.out:	-620.732	-208.075	-412.649	-208.075
24_Benzene-Benzene_pi-pi_0.90	0.105376	24_Benzene-Benzene_pi-pi_0.90	-463.713	-231.853	-231.853	-231.853	-231.853		3.98133	3.92057	3.95095	0.0607554		-463.706	-231.85	-231.85	-231.85	-231.85		4.0765	3.84124	3.95887	0.235267		24_Benzene-Benzene_pi-pi_0.90	-463.7	-231.849	-231.849	-231.849	-231.849		0.576058	0.517068	0.546563	0.0589897			24_Benzene-Benzene_pi-pi_0.90	-461.574	-230.797	-230.797	-230.797	-230.797		24_Benzene-Benzene_pi-pi_0.90.out:	-461.569	-230.795	-230.795	-230.795
24_Benzene-Benzene_pi-pi_0.95	2.01598	24_Benzene-Benzene_pi-pi_0.95	-463.715	-231.853	-231.853	-231.853	-231.853		4.96184	4.90764	4.93474	0.0541957		-463.707	-231.85	-231.85	-231.85	-231.85		5.04138	4.8325	4.93694	0.208878		24_Benzene-Benzene_pi-pi_0.95	-463.702	-231.849	-231.849	-231.849	-231.849		2.30443	2.25199	2.27821	0.0524411			24_Benzene-Benzene_pi-pi_0.95	-461.582	-230.797	-230.797	-230.797	-230.797		24_Benzene-Benzene_pi-pi_0.95.out:	-461.577	-230.795	-230.795	-230.795
24_Benzene-Benzene_pi-pi_1.00	2.72488	24_Benzene-Benzene_pi-pi_1.00	-463.715	-231.853	-231.853	-231.853	-231.853		4.98086	4.93239	4.95662	0.0484762		-463.707	-231.85	-231.85	-231.85	-231.85		5.04802	4.86324	4.95563	0.184779		24_Benzene-Benzene_pi-pi_1.00	-463.703	-231.849	-231.849	-231.849	-231.849		2.89768	2.85091	2.87429	0.0467673			24_Benzene-Benzene_pi-pi_1.00	-461.587	-230.797	-230.797	-230.797	-230.797		24_Benzene-Benzene_pi-pi_1.00.out:	-461.582	-230.795	-230.795	-230.795
24_Benzene-Benzene_pi-pi_1.05	2.81335	24_Benzene-Benzene_pi-pi_1.05	-463.714	-231.853	-231.853	-231.853	-231.853		4.5539	4.51049	4.53219	0.0434117		-463.706	-231.85	-231.85	-231.85	-231.85		4.61113	4.44869	4.52991	0.162443		24_Benzene-Benzene_pi-pi_1.05	-463.703	-231.849	-231.849	-231.849	-231.849		2.91433	2.87258	2.89346	0.0417536			24_Benzene-Benzene_pi-pi_1.05	-461.59	-230.797	-230.797	-230.797	-230.797		24_Benzene-Benzene_pi-pi_1.05.out:	-461.585	-230.795	-230.795	-230.795
24_Benzene-Benzene_pi-pi_1.10	2.60708	24_Benzene-Benzene_pi-pi_1.10	-463.713	-231.853	-231.853	-231.853	-231.853		3.96069	3.92169	3.94119	0.0390013		-463.705	-231.85	-231.85	-231.85	-231.85		4.00952	3.86768	3.9386	0.141841		24_Benzene-Benzene_pi-pi_1.10	-463.703	-231.849	-231.849	-231.849	-231.849		2.66454	2.62714	2.64584	0.0374005			24_Benzene-Benzene_pi-pi_1.10	-461.591	-230.797	-230.797	-230.797	-230.797		24_Benzene-Benzene_pi-pi_1.10.out:	-461.587	-230.795	-230.795	-230.795
24_Benzene-Benzene_pi-pi_1.25	1.57756	24_Benzene-Benzene_pi-pi_1.25	-463.71	-231.853	-231.853	-231.853	-231.853		2.22578	2.19848	2.21213	0.027299		-463.703	-231.85	-231.85	-231.85	-231.85		2.25486	2.16535	2.2101	0.0895134		24_Benzene-Benzene_pi-pi_1.25	-463.701	-231.849	-231.849	-231.849	-231.849		1.58332	1.55735	1.57034	0.0259784			24_Benzene-Benzene_pi-pi_1.25	-461.594	-230.797	-230.797	-230.797	-230.797		24_Benzene-Benzene_pi-pi_1.25.out:	-461.589	-230.795	-230.795	-230.795
24_Benzene-Benzene_pi-pi_1.50	0.515145	24_Benzene-Benzene_pi-pi_1.50	-463.708	-231.853	-231.853	-231.853	-231.853		0.717864	0.705386	0.711625	0.0124773		-463.7	-231.85	-231.85	-231.85	-231.85		0.736914	0.693513	0.715214	0.0434009		24_Benzene-Benzene_pi-pi_1.50	-463.699	-231.849	-231.849	-231.849	-231.849		0.507867	0.496211	0.502039	0.0116559			24_Benzene-Benzene_pi-pi_1.50	-461.594	-230.797	-230.797	-230.797	-230.797		24_Benzene-Benzene_pi-pi_1.50.out:	-461.59	-230.795	-230.795	-230.795
24_Benzene-Benzene_pi-pi_2.00	0.0718033	24_Benzene-Benzene_pi-pi_2.00	-463.707	-231.853	-231.853	-231.853	-231.853		0.106535	0.102246	0.10439	0.00428886		-463.699	-231.85	-231.85	-231.85	-231.85		0.118061	0.100815	0.109438	0.0172465		24_Benzene-Benzene_pi-pi_2.00	-463.699	-231.849	-231.849	-231.849	-231.849		0.0699361	0.065863	0.0678996	0.00407306			24_Benzene-Benzene_pi-pi_2.00	-461.595	-230.797	-230.797	-230.797	-230.797		24_Benzene-Benzene_pi-pi_2.00.out:	-461.59	-230.795	-230.795	-230.795
25_Pyridine-Pyridine_pi-pi_0.90	1.20095	25_Pyridine-Pyridine_pi-pi_0.90	-495.793	-247.893	-247.893	-247.892	-247.892		5.33453	5.27775	5.30614	0.0567711		-495.785	-247.888	-247.888	-247.888	-247.888		5.41637	5.19404	5.3052	0.222324		25_Pyridine-Pyridine_pi-pi_0.90	-495.772	-247.885	-247.885	-247.884	-247.884		1.79928	1.74302	1.77115	0.0562561			25_Pyridine-Pyridine_pi-pi_0.90	-493.572	-246.796	-246.796	-246.796	-246.796		25_Pyridine-Pyridine_pi-pi_0.90.out:	-493.567	-246.794	-246.794	-246.794
25_Pyridine-Pyridine_pi-pi_0.95	3.11051	25_Pyridine-Pyridine_pi-pi_0.95	-495.795	-247.893	-247.893	-247.892	-247.892		6.28965	6.23914	6.26439	0.0505155		-495.787	-247.888	-247.888	-247.888	-247.888		6.35518	6.15874	6.25696	0.196444		25_Pyridine-Pyridine_pi-pi_0.95	-495.774	-247.884	-247.884	-247.884	-247.884		3.5034	3.4535	3.47845	0.0499018			25_Pyridine-Pyridine_pi-pi_0.95	-493.58	-246.796	-246.796	-246.796	-246.796		25_Pyridine-Pyridine_pi-pi_0.95.out:	-493.575	-246.794	-246.794	-246.794
25_Pyridine-Pyridine_pi-pi_1.00	3.80907	25_Pyridine-Pyridine_pi-pi_1.00	-495.795	-247.893	-247.893	-247.892	-247.892		6.27089	6.22604	6.24847	0.0448478		-495.787	-247.888	-247.888	-247.888	-247.888		6.32458	6.15112	6.23785	0.17346		25_Pyridine-Pyridine_pi-pi_1.00	-495.775	-247.884	-247.884	-247.884	-247.884		4.06681	4.02263	4.04472	0.0441789			25_Pyridine-Pyridine_pi-pi_1.00	-493.585	-246.796	-246.796	-246.796	-246.796		25_Pyridine-Pyridine_pi-pi_1.00.out:	-493.58	-246.794	-246.794	-246.794
25_Pyridine-Pyridine_pi-pi_1.05	3.86521	25_Pyridine-Pyridine_pi-pi_1.05	-495.794	-247.893	-247.893	-247.892	-247.892		5.78484	5.745	5.76492	0.0398433		-495.786	-247.888	-247.888	-247.888	-247.888		5.83019	5.67743	5.75381	0.15276		25_Pyridine-Pyridine_pi-pi_1.05	-495.775	-247.884	-247.884	-247.884	-247.884		4.03555	3.9964	4.01598	0.0391433			25_Pyridine-Pyridine_pi-pi_1.05	-493.588	-246.796	-246.796	-246.796	-246.796		25_Pyridine-Pyridine_pi-pi_1.05.out:	-493.583	-246.794	-246.794	-246.794
25_Pyridine-Pyridine_pi-pi_1.10	3.60651	25_Pyridine-Pyridine_pi-pi_1.10	-495.793	-247.893	-247.893	-247.892	-247.892		5.11491	5.07957	5.09724	0.035337		-495.785	-247.888	-247.888	-247.888	-247.888		5.15407	5.02013	5.0871	0.133944		25_Pyridine-Pyridine_pi-pi_1.10	-495.775	-247.884	-247.884	-247.884	-247.884		3.72122	3.6866	3.70391	0.0346169			25_Pyridine-Pyridine_pi-pi_1.10	-493.59	-246.796	-246.796	-246.796	-246.796		25_Pyridine-Pyridine_pi-pi_1.10.out:	-493.585	-246.794	-246.794	-246.794
25_Pyridine-Pyridine_pi-pi_1.25	2.39647	25_Pyridine-Pyridine_pi-pi_1.25	-495.79	-247.893	-247.893	-247.892	-247.892		3.16256	3.13806	3.15031	0.0245056		-495.782	-247.888	-247.888	-247.888	-247.888		3.18675	3.09998	3.14337	0.0867712		25_Pyridine-Pyridine_pi-pi_1.25	-495.773	-247.884	-247.884	-247.884	-247.884		2.44025	2.41644	2.42835	0.0238071			25_Pyridine-Pyridine_pi-pi_1.25	-493.592	-246.796	-246.796	-246.796	-246.796		25_Pyridine-Pyridine_pi-pi_1.25.out:	-493.587	-246.794	-246.794	-246.794
25_Pyridine-Pyridine_pi-pi_1.50	0.990079	25_Pyridine-Pyridine_pi-pi_1.50	-495.787	-247.892	-247.892	-247.892	-247.892		1.25164	1.24027	1.24596	0.0113756		-495.778	-247.888	-247.888	-247.888	-247.888		1.26584	1.22564	1.24574	0.0402021		25_Pyridine-Pyridine_pi-pi_1.50	-495.771	-247.884	-247.884	-247.884	-247.884		1.0056	0.994715	1.00016	0.0108838			25_Pyridine-Pyridine_pi-pi_1.50	-493.592	-246.796	-246.796	-246.796	-246.796		25_Pyridine-Pyridine_pi-pi_1.50.out:	-493.587	-246.794	-246.794	-246.794
25_Pyridine-Pyridine_pi-pi_2.00	0.245614	25_Pyridine-Pyridine_pi-pi_2.00	-495.785	-247.892	-247.892	-247.892	-247.892		0.296558	0.293501	0.29503	0.00305782		-495.777	-247.888	-247.888	-247.888	-247.888		0.306402	0.290811	0.298607	0.0155903		25_Pyridine-Pyridine_pi-pi_2.00	-495.769	-247.884	-247.884	-247.884	-247.884		0.252503	0.249558	0.251031	0.00294544			25_Pyridine-Pyridine_pi-pi_2.00	-493.592	-246.796	-246.796	-246.796	-246.796		25_Pyridine-Pyridine_pi-pi_2.00.out:	-493.587	-246.794	-246.794	-246.794
26_Uracil-Uracil_pi-pi_0.90	7.97577	26_Uracil-Uracil_pi-pi_0.90	-828.655	-414.319	-414.319	-414.319	-414.319		10.0958	9.96472	10.0302	0.131035		-828.638	-414.311	-414.311	-414.311	-414.311		10.2168	9.86072	10.0388	0.3561		26_Uracil-Uracil_pi-pi_0.90	-828.607	-414.299	-414.299	-414.299	-414.299		5.92023	5.79472	5.85748	0.125509			26_Uracil-Uracil_pi-pi_0.90	-825.298	-412.655	-412.655	-412.655	-412.655		26_Uracil-Uracil_pi-pi_0.90.out:	-825.289	-412.651	-412.651	-412.65
26_Uracil-Uracil_pi-pi_0.95	9.64006	26_Uracil-Uracil_pi-pi_0.95	-828.657	-414.319	-414.319	-414.319	-414.319		11.2505	11.1307	11.1906	0.119821		-828.64	-414.311	-414.311	-414.311	-414.311		11.3562	11.034	11.1951	0.322212		26_Uracil-Uracil_pi-pi_0.95	-828.61	-414.299	-414.299	-414.299	-414.299		7.84796	7.7336	7.79078	0.114358			26_Uracil-Uracil_pi-pi_0.95	-825.306	-412.655	-412.655	-412.655	-412.655		26_Uracil-Uracil_pi-pi_0.95.out:	-825.297	-412.651	-412.651	-412.65
26_Uracil-Uracil_pi-pi_1.00	9.97639	26_Uracil-Uracil_pi-pi_1.00	-828.657	-414.319	-414.319	-414.319	-414.319		11.204	11.0944	11.1492	0.109589		-828.64	-414.311	-414.311	-414.311	-414.311		11.2965	11.005	11.1508	0.291513		26_Uracil-Uracil_pi-pi_1.00	-828.611	-414.299	-414.299	-414.299	-414.299		8.42189	8.31761	8.36975	0.10428			26_Uracil-Uracil_pi-pi_1.00	-825.31	-412.655	-412.655	-412.655	-412.655		26_Uracil-Uracil_pi-pi_1.00.out:	-825.301	-412.651	-412.651	-412.65
26_Uracil-Uracil_pi-pi_1.05	9.58987	26_Uracil-Uracil_pi-pi_1.05	-828.656	-414.319	-414.319	-414.319	-414.319		10.5293	10.4292	10.4793	0.100053		-828.639	-414.311	-414.311	-414.311	-414.311		10.6108	10.3473	10.4791	0.263564		26_Uracil-Uracil_pi-pi_1.05	-828.611	-414.299	-414.299	-414.299	-414.299		8.24739	8.15241	8.1999	0.0949786			26_Uracil-Uracil_pi-pi_1.05	-825.312	-412.655	-412.655	-412.655	-412.655		26_Uracil-Uracil_pi-pi_1.05.out:	-825.303	-412.651	-412.651	-412.65
26_Uracil-Uracil_pi-pi_1.10	8.84824	26_Uracil-Uracil_pi-pi_1.10	-828.654	-414.319	-414.319	-414.319	-414.319		9.57076	9.47985	9.52531	0.0909099		-828.637	-414.311	-414.311	-414.311	-414.311		9.64316	9.40514	9.52415	0.238022		26_Uracil-Uracil_pi-pi_1.10	-828.61	-414.299	-414.299	-414.299	-414.299		7.69224	7.60611	7.64918	0.0861337			26_Uracil-Uracil_pi-pi_1.10	-825.314	-412.655	-412.655	-412.655	-412.655		26_Uracil-Uracil_pi-pi_1.10.out:	-825.305	-412.651	-412.651	-412.65
26_Uracil-Uracil_pi-pi_1.25	6.21709	26_Uracil-Uracil_pi-pi_1.25	-828.649	-414.319	-414.319	-414.319	-414.319		6.56035	6.49257	6.52646	0.0677767		-828.632	-414.311	-414.311	-414.311	-414.311		6.61056	6.43785	6.52421	0.17271		26_Uracil-Uracil_pi-pi_1.25	-828.606	-414.299	-414.299	-414.299	-414.299		5.48782	5.42378	5.4558	0.0640425			26_Uracil-Uracil_pi-pi_1.25	-825.314	-412.655	-412.655	-412.655	-412.655		26_Uracil-Uracil_pi-pi_1.25.out:	-825.305	-412.651	-412.651	-412.65
26_Uracil-Uracil_pi-pi_1.50	3.19565	26_Uracil-Uracil_pi-pi_1.50	-828.644	-414.319	-414.319	-414.319	-414.319		3.30589	3.26639	3.28614	0.039498		-828.627	-414.311	-414.311	-414.311	-414.311		3.3346	3.23771	3.28615	0.0968868		26_Uracil-Uracil_pi-pi_1.50	-828.602	-414.299	-414.299	-414.299	-414.299		2.84664	2.8094	2.82802	0.0372411			26_Uracil-Uracil_pi-pi_1.50	-825.313	-412.655	-412.655	-412.655	-412.655		26_Uracil-Uracil_pi-pi_1.50.out:	-825.304	-412.651	-412.651	-412.65
26_Uracil-Uracil_pi-pi_2.00	1.03386	26_Uracil-Uracil_pi-pi_2.00	-828.64	-414.319	-414.319	-414.319	-414.319		1.0419	1.02784	1.03487	0.0140576		-828.624	-414.311	-414.311	-414.311	-414.311		1.05761	1.02226	1.03994	0.0353436		26_Uracil-Uracil_pi-pi_2.00	-828.599	-414.299	-414.299	-414.299	-414.299		0.926411	0.913084	0.919748	0.0133276			26_Uracil-Uracil_pi-pi_2.00	-825.311	-412.655	-412.655	-412.655	-412.655		26_Uracil-Uracil_pi-pi_2.00.out:	-825.302	-412.651	-412.651	-412.65
27_Benzene-Pyridine_pi-pi_0.90	0.602151	27_Benzene-Pyridine_pi-pi_0.90	-479.753	-231.853	-247.893	-231.853	-247.892		4.62238	4.56294	4.59266	0.0594319		-479.745	-231.85	-247.888	-231.85	-247.888		4.7114	4.48203	4.59671	0.22937		27_Benzene-Pyridine_pi-pi_0.90	-479.736	-231.849	-247.885	-231.849	-247.884		1.10768	1.04939	1.07854	0.0582911			27_Benzene-Pyridine_pi-pi_0.90	-477.573	-230.797	-246.796	-230.797	-246.796		27_Benzene-Pyridine_pi-pi_0.90.out:	-477.568	-230.795	-246.794	-230.795
27_Benzene-Pyridine_pi-pi_0.95	2.63579	27_Benzene-Pyridine_pi-pi_0.95	-479.755	-231.853	-247.893	-231.853	-247.892		5.68446	5.63173	5.6581	0.0527275		-479.747	-231.85	-247.888	-231.85	-247.888		5.757	5.55459	5.65579	0.202402		27_Benzene-Pyridine_pi-pi_0.95	-479.738	-231.849	-247.885	-231.849	-247.884		2.94894	2.89741	2.92318	0.0515294			27_Benzene-Pyridine_pi-pi_0.95	-477.581	-230.797	-246.796	-230.797	-246.796		27_Benzene-Pyridine_pi-pi_0.95.out:	-477.576	-230.795	-246.794	-230.795
27_Benzene-Pyridine_pi-pi_1.00	3.35795	27_Benzene-Pyridine_pi-pi_1.00	-479.755	-231.853	-247.893	-231.853	-247.892		5.69032	5.64348	5.6669	0.0468413		-479.747	-231.85	-247.888	-231.85	-247.888		5.75054	5.57214	5.66134	0.178407		27_Benzene-Pyridine_pi-pi_1.00	-479.739	-231.849	-247.885	-231.849	-247.884		3.54945	3.50381	3.52663	0.0456364			27_Benzene-Pyridine_pi-pi_1.00	-477.586	-230.797	-246.796	-230.797	-246.796		27_Benzene-Pyridine_pi-pi_1.00.out:	-477.581	-230.795	-246.794	-230.795
27_Benzene-Pyridine_pi-pi_1.05	3.41398	27_Benzene-Pyridine_pi-pi_1.05	-479.754	-231.853	-247.893	-231.853	-247.892		5.21362	5.17191	5.19276	0.0417074		-479.746	-231.85	-247.888	-231.85	-247.888		5.26467	5.10798	5.18632	0.156684		27_Benzene-Pyridine_pi-pi_1.05	-479.739	-231.849	-247.884	-231.849	-247.884		3.53009	3.48957	3.50983	0.0405168			27_Benzene-Pyridine_pi-pi_1.05	-477.589	-230.797	-246.796	-230.797	-246.796		27_Benzene-Pyridine_pi-pi_1.05.out:	-477.584	-230.795	-246.794	-230.795
27_Benzene-Pyridine_pi-pi_1.10	3.15867	27_Benzene-Pyridine_pi-pi_1.10	-479.753	-231.853	-247.893	-231.853	-247.892		4.5597	4.52253	4.54112	0.0371747		-479.745	-231.85	-247.888	-231.85	-247.888		4.60354	4.46661	4.53508	0.136936		27_Benzene-Pyridine_pi-pi_1.10	-479.739	-231.849	-247.884	-231.849	-247.884		3.22907	3.19306	3.21106	0.0360079			27_Benzene-Pyridine_pi-pi_1.10	-477.591	-230.797	-246.796	-230.797	-246.796		27_Benzene-Pyridine_pi-pi_1.10.out:	-477.586	-230.795	-246.794	-230.795
27_Benzene-Pyridine_pi-pi_1.25	2.01249	27_Benzene-Pyridine_pi-pi_1.25	-479.75	-231.853	-247.893	-231.853	-247.892		2.70736	2.68136	2.69436	0.0259984		-479.742	-231.85	-247.888	-231.85	-247.888		2.73465	2.64634	2.6905	0.0883092		27_Benzene-Pyridine_pi-pi_1.25	-479.737	-231.849	-247.884	-231.849	-247.884		2.03005	2.00507	2.01756	0.0249801			27_Benzene-Pyridine_pi-pi_1.25	-477.593	-230.797	-246.796	-230.797	-246.796		27_Benzene-Pyridine_pi-pi_1.25.out:	-477.588	-230.795	-246.794	-230.795
27_Benzene-Pyridine_pi-pi_1.50	0.752017	27_Benzene-Pyridine_pi-pi_1.50	-479.747	-231.853	-247.893	-231.853	-247.892		0.977252	0.96513	0.971191	0.0121219		-479.739	-231.85	-247.888	-231.85	-247.888		0.99334	0.951967	0.972654	0.0413724		27_Benzene-Pyridine_pi-pi_1.50	-479.735	-231.849	-247.884	-231.849	-247.884		0.753415	0.741973	0.747694	0.0114416			27_Benzene-Pyridine_pi-pi_1.50	-477.593	-230.797	-246.796	-230.797	-246.796		27_Benzene-Pyridine_pi-pi_1.50.out:	-477.589	-230.795	-246.794	-230.795
27_Benzene-Pyridine_pi-pi_2.00	0.155335	27_Benzene-Pyridine_pi-pi_2.00	-479.746	-231.853	-247.893	-231.853	-247.892		0.19578	0.192203	0.193992	0.00357711		-479.738	-231.85	-247.888	-231.85	-247.888		0.205599	0.189838	0.197718	0.0157617		27_Benzene-Pyridine_pi-pi_2.00	-479.734	-231.849	-247.884	-231.849	-247.884		0.156658	0.153244	0.154951	0.00341438			27_Benzene-Pyridine_pi-pi_2.00	-477.593	-230.797	-246.796	-230.797	-246.796		27_Benzene-Pyridine_pi-pi_2.00.out:	-477.589	-230.795	-246.794	-230.795
28_Benzene-Uracil_pi-pi_0.90	3.49156	28_Benzene-Uracil_pi-pi_0.90	-646.184	-231.853	-414.32	-231.853	-414.32		6.74499	6.645	6.695	0.0999847		-646.172	-231.85	-414.312	-231.849	-414.311		6.85929	6.54997	6.70463	0.309319		28_Benzene-Uracil_pi-pi_0.90	-646.153	-231.849	-414.299	-231.849	-414.299		2.86019	2.76414	2.81217	0.0960495			28_Benzene-Uracil_pi-pi_0.90	-643.435	-230.797	-412.656	-230.797	-412.656		28_Benzene-Uracil_pi-pi_0.90.out:	-643.428	-230.795	-412.651	-230.795
28_Benzene-Uracil_pi-pi_0.95	5.22194	28_Benzene-Uracil_pi-pi_0.95	-646.186	-231.853	-414.32	-231.853	-414.32		7.72848	7.63728	7.68288	0.0911988		-646.173	-231.85	-414.312	-231.849	-414.311		7.82695	7.54824	7.6876	0.27871		28_Benzene-Uracil_pi-pi_0.95	-646.156	-231.849	-414.299	-231.849	-414.299		4.61958	4.53227	4.57592	0.0873075			28_Benzene-Uracil_pi-pi_0.95	-643.442	-230.797	-412.656	-230.797	-412.656		28_Benzene-Uracil_pi-pi_0.95.out:	-643.436	-230.795	-412.651	-230.795
28_Benzene-Uracil_pi-pi_1.00	5.74119	28_Benzene-Uracil_pi-pi_1.00	-646.185	-231.853	-414.32	-231.853	-414.32		7.68057	7.59749	7.63903	0.0830801		-646.173	-231.85	-414.312	-231.849	-414.311		7.76639	7.51518	7.64079	0.251205		28_Benzene-Uracil_pi-pi_1.00	-646.157	-231.849	-414.299	-231.849	-414.299		5.18693	5.10765	5.14729	0.0792888			28_Benzene-Uracil_pi-pi_1.00	-643.447	-230.797	-412.656	-230.797	-412.656		28_Benzene-Uracil_pi-pi_1.00.out:	-643.44	-230.795	-412.651	-230.795
28_Benzene-Uracil_pi-pi_1.05	5.60411	28_Benzene-Uracil_pi-pi_1.05	-646.185	-231.853	-414.32	-231.853	-414.32		7.11192	7.03634	7.07413	0.0755828		-646.172	-231.85	-414.312	-231.849	-414.311		7.18772	6.96143	7.07457	0.226296		28_Benzene-Uracil_pi-pi_1.05	-646.157	-231.849	-414.299	-231.849	-414.299		5.10765	5.03571	5.07168	0.0719345			28_Benzene-Uracil_pi-pi_1.05	-643.45	-230.797	-412.656	-230.797	-412.656		28_Benzene-Uracil_pi-pi_1.05.out:	-643.443	-230.795	-412.651	-230.795
28_Benzene-Uracil_pi-pi_1.10	5.14357	28_Benzene-Uracil_pi-pi_1.10	-646.183	-231.853	-414.32	-231.853	-414.32		6.32298	6.25442	6.2887	0.068564		-646.171	-231.85	-414.312	-231.849	-414.311		6.39038	6.18708	6.28873	0.203298		28_Benzene-Uracil_pi-pi_1.10	-646.156	-231.849	-414.299	-231.849	-414.299		4.70754	4.64245	4.675	0.0650894			28_Benzene-Uracil_pi-pi_1.10	-643.452	-230.797	-412.656	-230.797	-412.656		28_Benzene-Uracil_pi-pi_1.10.out:	-643.445	-230.795	-412.651	-230.795
28_Benzene-Uracil_pi-pi_1.25	3.36301	28_Benzene-Uracil_pi-pi_1.25	-646.18	-231.853	-414.32	-231.853	-414.32		3.95126	3.90065	3.92596	0.0506048		-646.167	-231.85	-414.312	-231.849	-414.311		3.99606	3.85415	3.9251	0.141909		28_Benzene-Uracil_pi-pi_1.25	-646.153	-231.849	-414.299	-231.849	-414.299		3.08913	3.04135	3.06524	0.0477782			28_Benzene-Uracil_pi-pi_1.25	-643.453	-230.797	-412.656	-230.797	-412.656		28_Benzene-Uracil_pi-pi_1.25.out:	-643.447	-230.795	-412.651	-230.795
28_Benzene-Uracil_pi-pi_1.50	1.41237	28_Benzene-Uracil_pi-pi_1.50	-646.176	-231.853	-414.32	-231.853	-414.32		1.62123	1.59304	1.60713	0.0281908		-646.164	-231.85	-414.311	-231.849	-414.311		1.64346	1.57108	1.60727	0.0723836		28_Benzene-Uracil_pi-pi_1.50	-646.151	-231.849	-414.299	-231.849	-414.299		1.29335	1.26687	1.28011	0.0264855			28_Benzene-Uracil_pi-pi_1.50	-643.454	-230.797	-412.656	-230.797	-412.656		28_Benzene-Uracil_pi-pi_1.50.out:	-643.447	-230.795	-412.651	-230.795
28_Benzene-Uracil_pi-pi_2.00	0.271054	28_Benzene-Uracil_pi-pi_2.00	-646.174	-231.853	-414.32	-231.853	-414.32		0.307248	0.298552	0.3029	0.00869609		-646.161	-231.85	-414.311	-231.849	-414.311		0.320255	0.293531	0.306893	0.0267234		28_Benzene-Uracil_pi-pi_2.00	-646.149	-231.849	-414.299	-231.849	-414.299		0.241693	0.233461	0.237577	0.00823157			28_Benzene-Uracil_pi-pi_2.00	-643.453	-230.797	-412.656	-230.797	-412.656		28_Benzene-Uracil_pi-pi_2.00.out:	-643.446	-230.795	-412.651	-230.795
29_Pyridine-Uracil_pi-pi_0.90	3.67934	29_Pyridine-Uracil_pi-pi_0.90	-662.224	-247.893	-414.32	-247.892	-414.32		7.17457	7.07561	7.12509	0.098958		-662.211	-247.888	-414.312	-247.888	-414.311		7.27629	6.97209	7.12419	0.304197		29_Pyridine-Uracil_pi-pi_0.90	-662.188	-247.884	-414.299	-247.884	-414.299		3.04133	2.94545	2.99339	0.0958812			29_Pyridine-Uracil_pi-pi_0.90	-659.432	-246.796	-412.656	-246.796	-412.656		29_Pyridine-Uracil_pi-pi_0.90.out:	-659.425	-246.793	-412.651	-246.793
29_Pyridine-Uracil_pi-pi_0.95	6.17031	29_Pyridine-Uracil_pi-pi_0.95	-662.226	-247.893	-414.32	-247.892	-414.32		8.74323	8.65457	8.6989	0.0886586		-662.214	-247.888	-414.312	-247.888	-414.311		8.82616	8.55852	8.69234	0.267642		29_Pyridine-Uracil_pi-pi_0.95	-662.192	-247.884	-414.299	-247.884	-414.299		5.55695	5.47139	5.51417	0.0855647			29_Pyridine-Uracil_pi-pi_0.95	-659.442	-246.796	-412.656	-246.796	-412.656		29_Pyridine-Uracil_pi-pi_0.95.out:	-659.435	-246.793	-412.651	-246.793
29_Pyridine-Uracil_pi-pi_1.00	6.84711	29_Pyridine-Uracil_pi-pi_1.00	-662.226	-247.892	-414.32	-247.892	-414.32		8.75906	8.67977	8.71942	0.0792956		-662.214	-247.888	-414.312	-247.888	-414.311		8.82818	8.5922	8.71019	0.235983		29_Pyridine-Uracil_pi-pi_1.00	-662.194	-247.884	-414.299	-247.884	-414.299		6.28745	6.21116	6.24931	0.0762874			29_Pyridine-Uracil_pi-pi_1.00	-659.448	-246.796	-412.656	-246.796	-412.656		29_Pyridine-Uracil_pi-pi_1.00.out:	-659.441	-246.793	-412.651	-246.793
29_Pyridine-Uracil_pi-pi_1.05	6.63673	29_Pyridine-Uracil_pi-pi_1.05	-662.225	-247.892	-414.32	-247.892	-414.32		8.07124	8.00059	8.03591	0.0706441		-662.213	-247.888	-414.312	-247.888	-414.311		8.13023	7.92233	8.02628	0.207905		29_Pyridine-Uracil_pi-pi_1.05	-662.193	-247.884	-414.299	-247.884	-414.299		6.14351	6.07572	6.10962	0.0677893			29_Pyridine-Uracil_pi-pi_1.05	-659.451	-246.796	-412.656	-246.796	-412.656		29_Pyridine-Uracil_pi-pi_1.05.out:	-659.444	-246.793	-412.651	-246.793
29_Pyridine-Uracil_pi-pi_1.10	6.03884	29_Pyridine-Uracil_pi-pi_1.10	-662.224	-247.892	-414.32	-247.892	-414.32		7.12688	7.06402	7.09545	0.0628654		-662.211	-247.888	-414.312	-247.888	-414.311		7.17743	6.99507	7.08625	0.182363		29_Pyridine-Uracil_pi-pi_1.10	-662.193	-247.884	-414.299	-247.884	-414.299		5.61459	5.55439	5.58449	0.0602053			29_Pyridine-Uracil_pi-pi_1.10	-659.452	-246.796	-412.656	-246.796	-412.656		29_Pyridine-Uracil_pi-pi_1.10.out:	-659.446	-246.793	-412.651	-246.793
29_Pyridine-Uracil_pi-pi_1.25	3.93693	29_Pyridine-Uracil_pi-pi_1.25	-662.219	-247.892	-414.32	-247.892	-414.32		4.4436	4.40021	4.4219	0.0433842		-662.207	-247.888	-414.311	-247.888	-414.311		4.47357	4.35507	4.41432	0.118494		29_Pyridine-Uracil_pi-pi_1.25	-662.189	-247.884	-414.299	-247.884	-414.299		3.68781	3.6464	3.6671	0.0414043			29_Pyridine-Uracil_pi-pi_1.25	-659.454	-246.796	-412.656	-246.796	-412.656		29_Pyridine-Uracil_pi-pi_1.25.out:	-659.447	-246.793	-412.651	-246.793
29_Pyridine-Uracil_pi-pi_1.50	1.82447	29_Pyridine-Uracil_pi-pi_1.50	-662.215	-247.892	-414.32	-247.892	-414.32		1.99305	1.9713	1.98218	0.0217496		-662.203	-247.888	-414.311	-247.888	-414.311		2.00823	1.95132	1.97977	0.0569093		29_Pyridine-Uracil_pi-pi_1.50	-662.186	-247.884	-414.299	-247.884	-414.299		1.72482	1.70409	1.71445	0.0207272			29_Pyridine-Uracil_pi-pi_1.50	-659.453	-246.796	-412.656	-246.796	-412.656		29_Pyridine-Uracil_pi-pi_1.50.out:	-659.446	-246.793	-412.651	-246.793
29_Pyridine-Uracil_pi-pi_2.00	0.552071	29_Pyridine-Uracil_pi-pi_2.00	-662.213	-247.892	-414.32	-247.892	-414.32		0.581424	0.575625	0.578525	0.00579919		-662.201	-247.888	-414.311	-247.888	-414.311		0.591718	0.571283	0.581501	0.0204354		29_Pyridine-Uracil_pi-pi_2.00	-662.184	-247.884	-414.299	-247.884	-414.299		0.530886	0.525346	0.528116	0.00553968			29_Pyridine-Uracil_pi-pi_2.00	-659.452	-246.796	-412.656	-246.796	-412.656		29_Pyridine-Uracil_pi-pi_2.00.out:	-659.445	-246.793	-412.651	-246.793
30_Benzene-Ethene_0.90	0.110963	30_Benzene-Ethene_0.90	-310.3	-231.853	-78.443	-231.853	-78.4429		2.00073	1.96409	1.98241	0.0366378		-310.294	-231.85	-78.4416	-231.85	-78.4415		2.02229	1.90068	1.96148	0.121608		30_Benzene-Ethene_0.90	-310.302	-231.849	-78.453	-231.849	-78.453		0.0973901	0.061103	0.0792465	0.036287			30_Benzene-Ethene_0.90	-308.856	-230.797	-78.0706	-230.797	-78.0706		30_Benzene-Ethene_0.90.out:	-308.853	-230.795	-78.0697	-230.795
30_Benzene-Ethene_0.95	1.02729	30_Benzene-Ethene_0.95	-310.3	-231.853	-78.4429	-231.853	-78.4429		2.44768	2.41515	2.43141	0.0325239		-310.295	-231.85	-78.4416	-231.85	-78.4415		2.45927	2.35384	2.40655	0.105436		30_Benzene-Ethene_0.95	-310.304	-231.849	-78.453	-231.849	-78.453		0.971497	0.939326	0.955412	0.0321706			30_Benzene-Ethene_0.95	-308.86	-230.797	-78.0706	-230.797	-78.0706		30_Benzene-Ethene_0.95.out:	-308.857	-230.795	-78.0697	-230.795
30_Benzene-Ethene_1.00	1.35041	30_Benzene-Ethene_1.00	-310.3	-231.853	-78.4429	-231.853	-78.4429		2.42524	2.39647	2.41085	0.0287615		-310.295	-231.85	-78.4415	-231.85	-78.4415		2.43101	2.33969	2.38535	0.0913251		30_Benzene-Ethene_1.00	-310.304	-231.849	-78.453	-231.849	-78.453		1.27609	1.24767	1.26188	0.0284138			30_Benzene-Ethene_1.00	-308.863	-230.797	-78.0706	-230.797	-78.0706		30_Benzene-Ethene_1.00.out:	-308.86	-230.795	-78.0697	-230.795
30_Benzene-Ethene_1.05	1.36583	30_Benzene-Ethene_1.05	-310.3	-231.853	-78.4429	-231.853	-78.4429		2.1849	2.15942	2.17216	0.0254821		-310.294	-231.85	-78.4415	-231.85	-78.4415		2.18804	2.10887	2.14846	0.0791678		30_Benzene-Ethene_1.05	-310.304	-231.849	-78.453	-231.849	-78.453		1.28745	1.26232	1.27488	0.0251294			30_Benzene-Ethene_1.05	-308.864	-230.797	-78.0706	-230.797	-78.0706		30_Benzene-Ethene_1.05.out:	-308.861	-230.795	-78.0697	-230.795
30_Benzene-Ethene_1.10	1.23689	30_Benzene-Ethene_1.10	-310.299	-231.853	-78.4429	-231.853	-78.4429		1.86582	1.84329	1.85456	0.0225304		-310.294	-231.85	-78.4415	-231.85	-78.4415		1.86838	1.79978	1.83408	0.0686002		30_Benzene-Ethene_1.10	-310.304	-231.849	-78.453	-231.849	-78.453		1.16231	1.14015	1.15123	0.022155			30_Benzene-Ethene_1.10	-308.865	-230.797	-78.0706	-230.797	-78.0706		30_Benzene-Ethene_1.10.out:	-308.862	-230.795	-78.0697	-230.795
30_Benzene-Ethene_1.25	0.69203	30_Benzene-Ethene_1.25	-310.298	-231.853	-78.4429	-231.853	-78.4429		0.987719	0.972477	0.980098	0.0152419		-310.293	-231.85	-78.4415	-231.85	-78.4415		0.991812	0.946758	0.969285	0.0450546		30_Benzene-Ethene_1.25	-310.303	-231.849	-78.453	-231.849	-78.453		0.640726	0.625918	0.633322	0.0148082			30_Benzene-Ethene_1.25	-308.867	-230.797	-78.0706	-230.797	-78.0706		30_Benzene-Ethene_1.25.out:	-308.864	-230.795	-78.0697	-230.795
30_Benzene-Ethene_1.50	0.182771	30_Benzene-Ethene_1.50	-310.297	-231.853	-78.4429	-231.853	-78.4429		0.274058	0.266691	0.270375	0.00736695		-310.291	-231.85	-78.4415	-231.85	-78.4415		0.281022	0.255791	0.268407	0.0252312		30_Benzene-Ethene_1.50	-310.303	-231.849	-78.453	-231.849	-78.453		0.156834	0.149824	0.153329	0.00700951			30_Benzene-Ethene_1.50	-308.868	-230.797	-78.0706	-230.797	-78.0706		30_Benzene-Ethene_1.50.out:	-308.864	-230.795	-78.0697	-230.795
30_Benzene-Ethene_2.00	-0.00645559	30_Benzene-Ethene_2.00	-310.296	-231.853	-78.4429	-231.853	-78.4429		0.00718279	0.00510987	0.00614633	0.00207292		-310.291	-231.85	-78.4415	-231.85	-78.4415		0.0143065	0.00366617	0.00898631	0.0106403		30_Benzene-Ethene_2.00	-310.302	-231.849	-78.453	-231.849	-78.453		-0.0121248	-0.0141307	-0.0131277	0.0020059			30_Benzene-Ethene_2.00	-308.868	-230.797	-78.0706	-230.797	-78.0706		30_Benzene-Ethene_2.00.out:	-308.865	-230.795	-78.0697	-230.795
31_Uracil-Ethene_0.90	2.51916	31_Uracil-Ethene_0.90	-492.769	-414.32	-78.4429	-414.32	-78.4429		3.65415	3.60301	3.62858	0.0511333		-492.759	-414.312	-78.4415	-414.311	-78.4415		3.6913	3.54111	3.61621	0.150193		31_Uracil-Ethene_0.90	-492.755	-414.299	-78.453	-414.299	-78.453		1.79157	1.74133	1.76645	0.0502385			31_Uracil-Ethene_0.90	-490.719	-412.656	-78.0705	-412.656	-78.0705		31_Uracil-Ethene_0.90.out:	-490.713	-412.651	-78.0697	-412.651
31_Uracil-Ethene_0.95	3.2089	31_Uracil-Ethene_0.95	-492.769	-414.32	-78.4429	-414.32	-78.4429		4.07365	4.0281	4.05088	0.0455484		-492.759	-414.312	-78.4415	-414.311	-78.4415		4.10128	3.96937	4.03532	0.131912		31_Uracil-Ethene_0.95	-492.756	-414.299	-78.453	-414.299	-78.453		2.57977	2.53503	2.5574	0.0447431			31_Uracil-Ethene_0.95	-490.722	-412.656	-78.0705	-412.656	-78.0705		31_Uracil-Ethene_0.95.out:	-490.717	-412.651	-78.0697	-412.651
31_Uracil-Ethene_1.00	3.36541	31_Uracil-Ethene_1.00	-492.769	-414.32	-78.4429	-414.32	-78.4429		4.02884	3.9882	4.00852	0.0406383		-492.759	-414.312	-78.4415	-414.311	-78.4415		4.04925	3.93359	3.99142	0.115663		31_Uracil-Ethene_1.00	-492.757	-414.299	-78.453	-414.299	-78.453		2.82661	2.7867	2.80666	0.039914			31_Uracil-Ethene_1.00	-490.724	-412.656	-78.0705	-412.656	-78.0705		31_Uracil-Ethene_1.00.out:	-490.719	-412.651	-78.0697	-412.651
31_Uracil-Ethene_1.05	3.23506	31_Uracil-Ethene_1.05	-492.769	-414.32	-78.4429	-414.32	-78.4429		3.7473	3.71098	3.72914	0.0363105		-492.759	-414.312	-78.4415	-414.311	-78.4415		3.76259	3.66126	3.71192	0.101329		31_Uracil-Ethene_1.05	-492.757	-414.299	-78.453	-414.299	-78.453		2.77701	2.74135	2.75918	0.0356555			31_Uracil-Ethene_1.05	-490.726	-412.656	-78.0705	-412.656	-78.0705		31_Uracil-Ethene_1.05.out:	-490.72	-412.651	-78.0697	-412.651
31_Uracil-Ethene_1.10	2.96582	31_Uracil-Ethene_1.10	-492.768	-414.32	-78.4429	-414.32	-78.4429		3.36395	3.33144	3.34769	0.0325065		-492.758	-414.312	-78.4415	-414.311	-78.4415		3.37581	3.28697	3.33139	0.0888424		31_Uracil-Ethene_1.10	-492.756	-414.299	-78.453	-414.299	-78.453		2.57826	2.54635	2.5623	0.0319096			31_Uracil-Ethene_1.10	-490.726	-412.656	-78.0705	-412.656	-78.0705		31_Uracil-Ethene_1.10.out:	-490.721	-412.651	-78.0697	-412.651
31_Uracil-Ethene_1.25	2.00895	31_Uracil-Ethene_1.25	-492.766	-414.32	-78.4429	-414.32	-78.4429		2.20248	2.17901	2.19074	0.0234682		-492.756	-414.311	-78.4415	-414.311	-78.4415		2.21024	2.14933	2.17978	0.0609082		31_Uracil-Ethene_1.25	-492.755	-414.299	-78.453	-414.299	-78.453		1.77687	1.75388	1.76537	0.0229855			31_Uracil-Ethene_1.25	-490.727	-412.656	-78.0705	-412.656	-78.0705		31_Uracil-Ethene_1.25.out:	-490.722	-412.651	-78.0697	-412.651
31_Uracil-Ethene_1.50	0.951385	31_Uracil-Ethene_1.50	-492.764	-414.32	-78.4429	-414.32	-78.4429		1.01375	1.00048	1.00712	0.0132777		-492.755	-414.311	-78.4415	-414.311	-78.4415		1.02132	0.986518	1.00392	0.0348022		31_Uracil-Ethene_1.50	-492.754	-414.299	-78.453	-414.299	-78.453		0.848256	0.83538	0.841818	0.0128759			31_Uracil-Ethene_1.50	-490.727	-412.656	-78.0705	-412.656	-78.0705		31_Uracil-Ethene_1.50.out:	-490.722	-412.651	-78.0697	-412.651
31_Uracil-Ethene_2.00	0.261729	31_Uracil-Ethene_2.00	-492.763	-414.32	-78.4429	-414.32	-78.4429		0.26966	0.265841	0.26775	0.00381901		-492.753	-414.311	-78.4415	-414.311	-78.4415		0.277259	0.263048	0.270153	0.0142112		31_Uracil-Ethene_2.00	-492.753	-414.299	-78.453	-414.299	-78.453		0.235777	0.232123	0.23395	0.00365399			31_Uracil-Ethene_2.00	-490.727	-412.656	-78.0705	-412.656	-78.0705		31_Uracil-Ethene_2.00.out:	-490.721	-412.651	-78.0696	-412.651
32_Uracil-Ethyne_0.90	2.70836	32_Uracil-Ethyne_0.90	-491.526	-414.32	-77.2003	-414.32	-77.2002		4.01833	3.95474	3.98654	0.0635933		-491.517	-414.311	-77.1989	-414.311	-77.1987		4.10871	3.88891	3.99881	0.219803		32_Uracil-Ethyne_0.90	-491.507	-414.299	-77.2042	-414.299	-77.2042		2.24919	2.18693	2.21806	0.0622616			32_Uracil-Ethyne_0.90	-489.504	-412.656	-76.8544	-412.656	-76.8544		32_Uracil-Ethyne_0.90.out:	-489.499	-412.651	-76.8536	-412.651
32_Uracil-Ethyne_0.95	3.50744	32_Uracil-Ethyne_0.95	-491.527	-414.32	-77.2003	-414.32	-77.2002		4.49367	4.43546	4.46457	0.0582099		-491.517	-414.311	-77.1989	-414.311	-77.1987		4.57346	4.3733	4.47338	0.200163		32_Uracil-Ethyne_0.95	-491.508	-414.299	-77.2042	-414.299	-77.2042		3.08437	3.02754	3.05596	0.0568327			32_Uracil-Ethyne_0.95	-489.508	-412.656	-76.8544	-412.656	-76.8544		32_Uracil-Ethyne_0.95.out:	-489.502	-412.651	-76.8536	-412.651
32_Uracil-Ethyne_1.00	3.70204	32_Uracil-Ethyne_1.00	-491.527	-414.32	-77.2003	-414.32	-77.2002		4.44841	4.39509	4.42175	0.0533138		-491.517	-414.311	-77.1989	-414.311	-77.1987		4.51979	4.3373	4.42854	0.182495		32_Uracil-Ethyne_1.00	-491.509	-414.299	-77.2042	-414.299	-77.2042		3.32196	3.27006	3.29601	0.0519042			32_Uracil-Ethyne_1.00	-489.51	-412.656	-76.8544	-412.656	-76.8544		32_Uracil-Ethyne_1.00.out:	-489.504	-412.651	-76.8536	-412.651
32_Uracil-Ethyne_1.05	3.57104	32_Uracil-Ethyne_1.05	-491.527	-414.32	-77.2003	-414.32	-77.2002		4.13877	4.08994	4.11435	0.048832		-491.517	-414.311	-77.1989	-414.311	-77.1987		4.20339	4.0368	4.12009	0.166591		32_Uracil-Ethyne_1.05	-491.508	-414.299	-77.2042	-414.299	-77.2042		3.23584	3.18844	3.21214	0.0474015			32_Uracil-Ethyne_1.05	-489.511	-412.656	-76.8544	-412.656	-76.8544		32_Uracil-Ethyne_1.05.out:	-489.506	-412.651	-76.8536	-412.651
32_Uracil-Ethyne_1.10	3.28142	32_Uracil-Ethyne_1.10	-491.526	-414.32	-77.2003	-414.32	-77.2002		3.71568	3.67097	3.69332	0.0447132		-491.516	-414.311	-77.1989	-414.311	-77.1987		3.77458	3.62235	3.69847	0.152232		32_Uracil-Ethyne_1.10	-491.508	-414.299	-77.2042	-414.299	-77.2042		2.98949	2.94622	2.96786	0.0432762			32_Uracil-Ethyne_1.10	-489.511	-412.656	-76.8544	-412.656	-76.8544		32_Uracil-Ethyne_1.10.out:	-489.506	-412.651	-76.8536	-412.651
32_Uracil-Ethyne_1.25	2.23208	32_Uracil-Ethyne_1.25	-491.524	-414.32	-77.2003	-414.32	-77.2002		2.4324	2.39812	2.41526	0.0342774		-491.514	-414.311	-77.1989	-414.311	-77.1987		2.47709	2.36087	2.41898	0.116215		32_Uracil-Ethyne_1.25	-491.507	-414.299	-77.2042	-414.299	-77.2042		2.04689	2.01398	2.03043	0.0329068			32_Uracil-Ethyne_1.25	-489.512	-412.656	-76.8544	-412.656	-76.8544		32_Uracil-Ethyne_1.25.out:	-489.506	-412.651	-76.8536	-412.651
32_Uracil-Ethyne_1.50	1.05367	32_Uracil-Ethyne_1.50	-491.522	-414.32	-77.2003	-414.32	-77.2002		1.11538	1.09317	1.10427	0.0222139		-491.512	-414.311	-77.1988	-414.311	-77.1987		1.14438	1.07072	1.10755	0.0736559		32_Uracil-Ethyne_1.50	-491.505	-414.299	-77.2042	-414.299	-77.2042		0.97033	0.949254	0.959792	0.0210763			32_Uracil-Ethyne_1.50	-489.511	-412.656	-76.8544	-412.656	-76.8544		32_Uracil-Ethyne_1.50.out:	-489.506	-412.651	-76.8536	-412.651
32_Uracil-Ethyne_2.00	0.277912	32_Uracil-Ethyne_2.00	-491.52	-414.32	-77.2003	-414.32	-77.2002		0.287468	0.278582	0.283025	0.00888565		-491.511	-414.311	-77.1988	-414.311	-77.1987		0.302949	0.2728	0.287875	0.0301487		32_Uracil-Ethyne_2.00	-491.504	-414.299	-77.2042	-414.299	-77.2042		0.259259	0.25093	0.255094	0.00832906			32_Uracil-Ethyne_2.00	-489.51	-412.656	-76.8544	-412.656	-76.8544		32_Uracil-Ethyne_2.00.out:	-489.505	-412.651	-76.8536	-412.651
33_Pyridine-Ethene_0.90	0.764551	33_Pyridine-Ethene_0.90	-326.34	-247.893	-78.443	-247.893	-78.4429		2.62974	2.59447	2.6121	0.0352719		-326.334	-247.888	-78.4416	-247.888	-78.4415		2.64847	2.53018	2.58932	0.118289		33_Pyridine-Ethene_0.90	-326.339	-247.885	-78.453	-247.884	-78.453		0.726332	0.691007	0.70867	0.0353251			33_Pyridine-Ethene_0.90	-324.856	-246.796	-78.0706	-246.796	-78.0706		33_Pyridine-Ethene_0.90.out:	-324.852	-246.794	-78.0697	-246.794
33_Pyridine-Ethene_0.95	1.54094	33_Pyridine-Ethene_0.95	-326.34	-247.893	-78.4429	-247.893	-78.4429		2.9725	2.9408	2.95665	0.031705		-326.334	-247.888	-78.4416	-247.888	-78.4415		2.98169	2.87848	2.93009	0.103213		33_Pyridine-Ethene_0.95	-326.34	-247.885	-78.453	-247.884	-78.453		1.46964	1.43796	1.4538	0.0316745			33_Pyridine-Ethene_0.95	-324.859	-246.796	-78.0706	-246.796	-78.0706		33_Pyridine-Ethene_0.95.out:	-324.856	-246.794	-78.0697	-246.794
33_Pyridine-Ethene_1.00	1.8083	33_Pyridine-Ethene_1.00	-326.34	-247.893	-78.4429	-247.893	-78.4429		2.91373	2.88529	2.89951	0.0284455		-326.334	-247.888	-78.4415	-247.888	-78.4415		2.91707	2.82701	2.87204	0.0900605		33_Pyridine-Ethene_1.00	-326.34	-247.884	-78.453	-247.884	-78.453		1.72307	1.69472	1.70889	0.0283406			33_Pyridine-Ethene_1.00	-324.862	-246.796	-78.0706	-246.796	-78.0706		33_Pyridine-Ethene_1.00.out:	-324.859	-246.794	-78.0697	-246.794
33_Pyridine-Ethene_1.05	1.79853	33_Pyridine-Ethene_1.05	-326.34	-247.893	-78.4429	-247.893	-78.4429		2.65737	2.63193	2.64465	0.0254401		-326.334	-247.888	-78.4415	-247.888	-78.4415		2.6579	2.57932	2.61861	0.0785838		33_Pyridine-Ethene_1.05	-326.34	-247.884	-78.453	-247.884	-78.453		1.71131	1.68603	1.69867	0.0252719			33_Pyridine-Ethene_1.05	-324.863	-246.796	-78.0706	-246.796	-78.0706		33_Pyridine-Ethene_1.05.out:	-324.86	-246.794	-78.0697	-246.794
33_Pyridine-Ethene_1.10	1.65103	33_Pyridine-Ethene_1.10	-326.339	-247.893	-78.4429	-247.893	-78.4429		2.32291	2.30022	2.31156	0.0226893		-326.333	-247.888	-78.4415	-247.888	-78.4415		2.32267	2.25406	2.28837	0.0686155		33_Pyridine-Ethene_1.10	-326.34	-247.884	-78.453	-247.884	-78.453		1.56867	1.5462	1.55743	0.0224709			33_Pyridine-Ethene_1.10	-324.864	-246.796	-78.0706	-246.796	-78.0706		33_Pyridine-Ethene_1.10.out:	-324.861	-246.794	-78.0697	-246.794
33_Pyridine-Ethene_1.25	1.02959	33_Pyridine-Ethene_1.25	-326.338	-247.893	-78.4429	-247.893	-78.4429		1.36398	1.34822	1.3561	0.0157546		-326.332	-247.888	-78.4415	-247.888	-78.4415		1.36587	1.31977	1.34282	0.0461033		33_Pyridine-Ethene_1.25	-326.339	-247.884	-78.453	-247.884	-78.453		0.973825	0.958365	0.966095	0.0154597			33_Pyridine-Ethene_1.25	-324.866	-246.796	-78.0706	-246.796	-78.0706		33_Pyridine-Ethene_1.25.out:	-324.862	-246.794	-78.0697	-246.794
33_Pyridine-Ethene_1.50	0.373598	33_Pyridine-Ethene_1.50	-326.336	-247.893	-78.4429	-247.893	-78.4429		0.489035	0.480988	0.485011	0.00804689		-326.331	-247.888	-78.4415	-247.888	-78.4415		0.494619	0.468663	0.481641	0.0259563		33_Pyridine-Ethene_1.50	-326.338	-247.884	-78.453	-247.884	-78.453		0.348039	0.340273	0.344156	0.00776615			33_Pyridine-Ethene_1.50	-324.866	-246.796	-78.0706	-246.796	-78.0706		33_Pyridine-Ethene_1.50.out:	-324.863	-246.794	-78.0697	-246.794
33_Pyridine-Ethene_2.00	0.0492694	33_Pyridine-Ethene_2.00	-326.336	-247.893	-78.4429	-247.893	-78.4429		0.0687374	0.0666219	0.0676796	0.00211553		-326.33	-247.888	-78.4415	-247.888	-78.4415		0.0746927	0.0644071	0.0695499	0.0102856		33_Pyridine-Ethene_2.00	-326.338	-247.884	-78.453	-247.884	-78.453		0.0431121	0.041072	0.042092	0.0020401			33_Pyridine-Ethene_2.00	-324.867	-246.796	-78.0706	-246.796	-78.0706		33_Pyridine-Ethene_2.00.out:	-324.863	-246.794	-78.0697	-246.794
34_Pentane-Pentane_0.90	2.91887	34_Pentane-Pentane_0.90	-394.821	-197.408	-197.408	-197.408	-197.408		3.26159	3.23934	3.25046	0.0222439		-394.813	-197.404	-197.404	-197.404	-197.404		3.27657	3.19924	3.2379	0.0773299		34_Pentane-Pentane_0.90	-394.863	-197.431	-197.431	-197.431	-197.431		0.846738	0.824407	0.835572	0.0223308			34_Pentane-Pentane_0.90	-392.826	-196.419	-196.419	-196.419	-196.419		34_Pentane-Pentane_0.90.out:	-392.821	-196.417	-196.417	-196.417
34_Pentane-Pentane_0.95	3.67445	34_Pentane-Pentane_0.95	-394.822	-197.408	-197.408	-197.408	-197.408		3.89401	3.87522	3.88462	0.0187823		-394.814	-197.404	-197.404	-197.404	-197.404		3.90365	3.84006	3.87186	0.0635977		34_Pentane-Pentane_0.95	-394.865	-197.431	-197.431	-197.431	-197.431		1.95449	1.93575	1.94512	0.0187371			34_Pentane-Pentane_0.95	-392.83	-196.419	-196.419	-196.419	-196.419		34_Pentane-Pentane_0.95.out:	-392.826	-196.417	-196.417	-196.417
34_Pentane-Pentane_1.00	3.81979	34_Pentane-Pentane_1.00	-394.822	-197.408	-197.408	-197.408	-197.408		3.96394	3.94801	3.95597	0.0159292		-394.815	-197.404	-197.404	-197.404	-197.404		3.96996	3.91758	3.94377	0.0523845		34_Pentane-Pentane_1.00	-394.865	-197.431	-197.431	-197.431	-197.431		2.39458	2.37879	2.38668	0.0157976			34_Pentane-Pentane_1.00	-392.833	-196.419	-196.419	-196.419	-196.419		34_Pentane-Pentane_1.00.out:	-392.829	-196.417	-196.417	-196.417
34_Pentane-Pentane_1.05	3.65128	34_Pentane-Pentane_1.05	-394.821	-197.408	-197.408	-197.408	-197.408		3.74968	3.7361	3.74289	0.0135834		-394.814	-197.404	-197.404	-197.404	-197.404		3.75334	3.70998	3.73166	0.0433568		34_Pentane-Pentane_1.05	-394.866	-197.431	-197.431	-197.431	-197.431		2.47154	2.45814	2.46484	0.0134037			34_Pentane-Pentane_1.05	-392.835	-196.419	-196.419	-196.419	-196.419		34_Pentane-Pentane_1.05.out:	-392.831	-196.417	-196.417	-196.417
34_Pentane-Pentane_1.10	3.33681	34_Pentane-Pentane_1.10	-394.821	-197.408	-197.408	-197.408	-197.408		3.40793	3.39623	3.40208	0.0117		-394.814	-197.404	-197.404	-197.404	-197.404		3.40998	3.37393	3.39195	0.0360454		34_Pentane-Pentane_1.10	-394.865	-197.431	-197.431	-197.431	-197.431		2.36009	2.3486	2.35434	0.0114944			34_Pentane-Pentane_1.10	-392.836	-196.419	-196.419	-196.419	-196.419		34_Pentane-Pentane_1.10.out:	-392.832	-196.417	-196.417	-196.417
34_Pentane-Pentane_1.25	2.25711	34_Pentane-Pentane_1.25	-394.819	-197.408	-197.408	-197.408	-197.408		2.29601	2.2886	2.29231	0.0074129		-394.812	-197.404	-197.404	-197.404	-197.404		2.29531	2.27428	2.28479	0.0210302		34_Pentane-Pentane_1.25	-394.864	-197.431	-197.431	-197.431	-197.431		1.69748	1.69027	1.69387	0.0072074			34_Pentane-Pentane_1.25	-392.838	-196.419	-196.419	-196.419	-196.419		34_Pentane-Pentane_1.25.out:	-392.833	-196.417	-196.417	-196.417
34_Pentane-Pentane_1.50	1.06638	34_Pentane-Pentane_1.50	-394.817	-197.408	-197.408	-197.408	-197.408		1.09118	1.08752	1.08935	0.00366243		-394.81	-197.404	-197.404	-197.404	-197.404		1.09064	1.08052	1.08558	0.0101239		34_Pentane-Pentane_1.50	-394.863	-197.431	-197.431	-197.431	-197.431		0.829255	0.825738	0.827497	0.00351693			34_Pentane-Pentane_1.50	-392.838	-196.419	-196.419	-196.419	-196.419		34_Pentane-Pentane_1.50.out:	-392.834	-196.417	-196.417	-196.417
34_Pentane-Pentane_2.00	0.278441	34_Pentane-Pentane_2.00	-394.816	-197.408	-197.408	-197.408	-197.408		0.28962	0.288062	0.288841	0.0015572		-394.809	-197.404	-197.404	-197.404	-197.404		0.289597	0.286559	0.288078	0.0030378		34_Pentane-Pentane_2.00	-394.862	-197.431	-197.431	-197.431	-197.431		0.221006	0.219525	0.220266	0.00148077			34_Pentane-Pentane_2.00	-392.838	-196.419	-196.419	-196.419	-196.419		34_Pentane-Pentane_2.00.out:	-392.834	-196.417	-196.417	-196.417
35_Neopentane-Pentane_0.90	1.91344	35_Neopentane-Pentane_0.90	-394.826	-197.408	-197.415	-197.408	-197.415		2.05496	2.03828	2.04662	0.0166791		-394.819	-197.404	-197.412	-197.404	-197.412		2.07527	2.01222	2.04375	0.0630554		35_Neopentane-Pentane_0.90	-394.868	-197.431	-197.437	-197.431	-197.437		0.347107	0.330361	0.338734	0.0167464			35_Neopentane-Pentane_0.90	-392.829	-196.419	-196.419	-196.419	-196.419		35_Neopentane-Pentane_0.90.out:	-392.825	-196.417	-196.417	-196.417
35_Neopentane-Pentane_0.95	2.54217	35_Neopentane-Pentane_0.95	-394.827	-197.408	-197.415	-197.408	-197.415		2.60583	2.59199	2.59891	0.01384		-394.82	-197.404	-197.412	-197.404	-197.412		2.6217	2.56995	2.59582	0.0517479		35_Neopentane-Pentane_0.95	-394.87	-197.431	-197.437	-197.431	-197.437		1.2678	1.25401	1.26091	0.0137866			35_Neopentane-Pentane_0.95	-392.833	-196.419	-196.419	-196.419	-196.419		35_Neopentane-Pentane_0.95.out:	-392.828	-196.417	-196.417	-196.417
35_Neopentane-Pentane_1.00	2.65134	35_Neopentane-Pentane_1.00	-394.827	-197.408	-197.415	-197.408	-197.415		2.67524	2.66372	2.66948	0.0115212		-394.82	-197.404	-197.412	-197.404	-197.412		2.68784	2.64514	2.66649	0.0426999		35_Neopentane-Pentane_1.00	-394.87	-197.431	-197.437	-197.431	-197.437		1.61201	1.60062	1.60632	0.0113975			35_Neopentane-Pentane_1.00	-392.835	-196.419	-196.419	-196.419	-196.419		35_Neopentane-Pentane_1.00.out:	-392.831	-196.417	-196.417	-196.417
35_Neopentane-Pentane_1.05	2.51754	35_Neopentane-Pentane_1.05	-394.827	-197.408	-197.415	-197.408	-197.415		2.52249	2.51277	2.51763	0.00971468		-394.82	-197.404	-197.412	-197.404	-197.412		2.53239	2.49717	2.51478	0.035221		35_Neopentane-Pentane_1.05	-394.87	-197.431	-197.437	-197.431	-197.437		1.66788	1.65833	1.6631	0.00954944			35_Neopentane-Pentane_1.05	-392.836	-196.419	-196.419	-196.419	-196.419		35_Neopentane-Pentane_1.05.out:	-392.832	-196.417	-196.417	-196.417
35_Neopentane-Pentane_1.10	2.28186	35_Neopentane-Pentane_1.10	-394.827	-197.408	-197.415	-197.408	-197.415		2.27886	2.27064	2.27475	0.00822082		-394.82	-197.404	-197.412	-197.404	-197.412		2.28654	2.25747	2.272	0.0290695		35_Neopentane-Pentane_1.10	-394.87	-197.431	-197.437	-197.431	-197.437		1.58483	1.57679	1.58081	0.00803443			35_Neopentane-Pentane_1.10	-392.837	-196.419	-196.419	-196.419	-196.419		35_Neopentane-Pentane_1.10.out:	-392.833	-196.417	-196.417	-196.417
35_Neopentane-Pentane_1.25	1.51579	35_Neopentane-Pentane_1.25	-394.825	-197.408	-197.415	-197.408	-197.415		1.51237	1.50722	1.50979	0.00515371		-394.818	-197.404	-197.412	-197.404	-197.412		1.51562	1.4987	1.50716	0.0169239		35_Neopentane-Pentane_1.25	-394.869	-197.431	-197.437	-197.431	-197.437		1.12129	1.11633	1.11881	0.00496821			35_Neopentane-Pentane_1.25	-392.838	-196.419	-196.419	-196.419	-196.419		35_Neopentane-Pentane_1.25.out:	-392.834	-196.417	-196.417	-196.417
35_Neopentane-Pentane_1.50	0.711231	35_Neopentane-Pentane_1.50	-394.824	-197.408	-197.415	-197.408	-197.415		0.715594	0.713071	0.714332	0.00252343		-394.817	-197.404	-197.412	-197.404	-197.412		0.716629	0.708525	0.712577	0.00810458		35_Neopentane-Pentane_1.50	-394.868	-197.431	-197.437	-197.431	-197.437		0.544132	0.541717	0.542925	0.00241432			35_Neopentane-Pentane_1.50	-392.838	-196.419	-196.419	-196.419	-196.419		35_Neopentane-Pentane_1.50.out:	-392.834	-196.417	-196.417	-196.417
35_Neopentane-Pentane_2.00	0.191308	35_Neopentane-Pentane_2.00	-394.823	-197.408	-197.415	-197.408	-197.415		0.195395	0.194155	0.194775	0.00123979		-394.816	-197.404	-197.412	-197.404	-197.412		0.195401	0.192792	0.194097	0.00260942		35_Neopentane-Pentane_2.00	-394.868	-197.431	-197.437	-197.431	-197.437		0.149131	0.147949	0.14854	0.00118224			35_Neopentane-Pentane_2.00	-392.838	-196.419	-196.419	-196.419	-196.419		35_Neopentane-Pentane_2.00.out:	-392.834	-196.417	-196.417	-196.417
36_Neopentane-Neopentane_0.90	1.48419	36_Neopentane-Neopentane_0.90	-394.833	-197.415	-197.415	-197.415	-197.415		1.45298	1.44163	1.44731	0.0113537		-394.826	-197.412	-197.412	-197.412	-197.412		1.46897	1.4243	1.44663	0.0446664		36_Neopentane-Neopentane_0.90	-394.874	-197.437	-197.437	-197.437	-197.437		0.387288	0.375914	0.381601	0.0113738			36_Neopentane-Neopentane_0.90	-392.833	-196.419	-196.419	-196.419	-196.419		36_Neopentane-Neopentane_0.90.out:	-392.829	-196.417	-196.417	-196.417
36_Neopentane-Neopentane_0.95	1.75788	36_Neopentane-Neopentane_0.95	-394.833	-197.415	-197.415	-197.415	-197.415		1.70848	1.69855	1.70352	0.00992965		-394.826	-197.412	-197.412	-197.412	-197.412		1.72244	1.68446	1.70345	0.0379777		36_Neopentane-Neopentane_0.95	-394.875	-197.437	-197.437	-197.437	-197.437		0.85194	0.842058	0.846999	0.00988207			36_Neopentane-Neopentane_0.95	-392.835	-196.419	-196.419	-196.419	-196.419		36_Neopentane-Neopentane_0.95.out:	-392.831	-196.417	-196.417	-196.417
36_Neopentane-Neopentane_1.00	1.79011	36_Neopentane-Neopentane_1.00	-394.833	-197.415	-197.415	-197.415	-197.415		1.73617	1.72734	1.73176	0.00882928		-394.826	-197.412	-197.412	-197.412	-197.412		1.74845	1.71596	1.73221	0.0324934		36_Neopentane-Neopentane_1.00	-394.875	-197.437	-197.437	-197.437	-197.437		1.04099	1.03228	1.03663	0.00870755			36_Neopentane-Neopentane_1.00	-392.836	-196.419	-196.419	-196.419	-196.419		36_Neopentane-Neopentane_1.00.out:	-392.832	-196.417	-196.417	-196.417
36_Neopentane-Neopentane_1.05	1.6984	36_Neopentane-Neopentane_1.05	-394.833	-197.415	-197.415	-197.415	-197.415		1.64686	1.63868	1.64277	0.00818235		-394.826	-197.412	-197.412	-197.412	-197.412		1.65735	1.62975	1.64355	0.0276056		36_Neopentane-Neopentane_1.05	-394.875	-197.437	-197.437	-197.437	-197.437		1.07801	1.06998	1.074	0.00802483			36_Neopentane-Neopentane_1.05	-392.837	-196.419	-196.419	-196.419	-196.419		36_Neopentane-Neopentane_1.05.out:	-392.833	-196.417	-196.417	-196.417
36_Neopentane-Neopentane_1.10	1.55092	36_Neopentane-Neopentane_1.10	-394.833	-197.415	-197.415	-197.415	-197.415		1.50357	1.49668	1.50012	0.00689658		-394.826	-197.412	-197.412	-197.412	-197.412		1.51247	1.48918	1.50083	0.0232828		36_Neopentane-Neopentane_1.10	-394.875	-197.437	-197.437	-197.437	-197.437		1.0345	1.02776	1.03113	0.00673747			36_Neopentane-Neopentane_1.10	-392.838	-196.419	-196.419	-196.419	-196.419		36_Neopentane-Neopentane_1.10.out:	-392.833	-196.417	-196.417	-196.417
36_Neopentane-Neopentane_1.25	1.06046	36_Neopentane-Neopentane_1.25	-394.832	-197.415	-197.415	-197.415	-197.415		1.03038	1.02594	1.02816	0.00444066		-394.825	-197.412	-197.412	-197.412	-197.412		1.03533	1.02121	1.02827	0.0141237		36_Neopentane-Neopentane_1.25	-394.875	-197.437	-197.437	-197.437	-197.437		0.756925	0.752644	0.754785	0.00428061			36_Neopentane-Neopentane_1.25	-392.838	-196.419	-196.419	-196.419	-196.419		36_Neopentane-Neopentane_1.25.out:	-392.834	-196.417	-196.417	-196.417
36_Neopentane-Neopentane_1.50	0.512297	36_Neopentane-Neopentane_1.50	-394.831	-197.415	-197.415	-197.415	-197.415		0.504083	0.502011	0.503047	0.00207157		-394.824	-197.412	-197.412	-197.412	-197.412		0.505691	0.498543	0.502117	0.00714771		36_Neopentane-Neopentane_1.50	-394.874	-197.437	-197.437	-197.437	-197.437		0.380446	0.378472	0.379459	0.00197424			36_Neopentane-Neopentane_1.50	-392.839	-196.419	-196.419	-196.419	-196.419		36_Neopentane-Neopentane_1.50.out:	-392.834	-196.417	-196.417	-196.417
36_Neopentane-Neopentane_2.00	0.138908	36_Neopentane-Neopentane_2.00	-394.831	-197.415	-197.415	-197.415	-197.415		0.140121	0.139082	0.139601	0.00103925		-394.824	-197.412	-197.412	-197.412	-197.412		0.14043	0.138348	0.139389	0.00208153		36_Neopentane-Neopentane_2.00	-394.874	-197.437	-197.437	-197.437	-197.437		0.106184	0.105178	0.105681	0.00100647			36_Neopentane-Neopentane_2.00	-392.839	-196.419	-196.419	-196.419	-196.419		36_Neopentane-Neopentane_2.00.out:	-392.834	-196.417	-196.417	-196.417
37_Cyclopentane-Neopentane_0.90	1.66886	37_Cyclopentane-Neopentane_0.90	-393.625	-196.206	-197.415	-196.206	-197.415		1.85758	1.84141	1.84949	0.0161719		-393.618	-196.203	-197.412	-196.203	-197.412		1.87482	1.81628	1.84555	0.0585395		37_Cyclopentane-Neopentane_0.90	-393.659	-196.222	-197.437	-196.222	-197.437		0.154101	0.137723	0.145912	0.0163779			37_Cyclopentane-Neopentane_0.90	-391.654	-195.244	-196.419	-195.244	-196.419		37_Cyclopentane-Neopentane_0.90.out:	-391.65	-195.242	-196.417	-195.242
37_Cyclopentane-Neopentane_0.95	2.29906	37_Cyclopentane-Neopentane_0.95	-393.625	-196.206	-197.415	-196.206	-197.415		2.39788	2.38457	2.39122	0.0133117		-393.619	-196.203	-197.412	-196.203	-197.412		2.41029	2.36312	2.38671	0.0471639		37_Cyclopentane-Neopentane_0.95	-393.66	-196.222	-197.437	-196.222	-197.437		1.06355	1.05016	1.05686	0.0133857			37_Cyclopentane-Neopentane_0.95	-391.658	-195.244	-196.419	-195.244	-196.419		37_Cyclopentane-Neopentane_0.95.out:	-391.654	-195.242	-196.417	-195.242
37_Cyclopentane-Neopentane_1.00	2.44277	37_Cyclopentane-Neopentane_1.00	-393.626	-196.206	-197.415	-196.206	-197.415		2.49319	2.48211	2.48765	0.0110761		-393.619	-196.203	-197.412	-196.203	-197.412		2.50233	2.46401	2.48317	0.0383159		37_Cyclopentane-Neopentane_1.00	-393.661	-196.222	-197.437	-196.222	-197.437		1.43139	1.42033	1.42586	0.0110614			37_Cyclopentane-Neopentane_1.00	-391.66	-195.244	-196.419	-195.244	-196.419		37_Cyclopentane-Neopentane_1.00.out:	-391.656	-195.242	-196.417	-195.242
37_Cyclopentane-Neopentane_1.05	2.35362	37_Cyclopentane-Neopentane_1.05	-393.625	-196.206	-197.415	-196.206	-197.415		2.37859	2.36934	2.37396	0.00924619		-393.618	-196.203	-197.412	-196.203	-197.412		2.3857	2.35417	2.36993	0.0315261		37_Cyclopentane-Neopentane_1.05	-393.661	-196.222	-197.437	-196.222	-197.437		1.52315	1.51397	1.51856	0.00917831			37_Cyclopentane-Neopentane_1.05	-391.661	-195.244	-196.419	-195.244	-196.419		37_Cyclopentane-Neopentane_1.05.out:	-391.657	-195.242	-196.417	-195.242
37_Cyclopentane-Neopentane_1.10	2.16092	37_Cyclopentane-Neopentane_1.10	-393.625	-196.206	-197.415	-196.206	-197.415		2.17308	2.16528	2.16918	0.00780532		-393.618	-196.203	-197.412	-196.203	-197.412		2.17883	2.1525	2.16567	0.0263318		37_Cyclopentane-Neopentane_1.10	-393.661	-196.222	-197.437	-196.222	-197.437		1.47644	1.46873	1.47259	0.00770847			37_Cyclopentane-Neopentane_1.10	-391.662	-195.244	-196.419	-195.244	-196.419		37_Cyclopentane-Neopentane_1.10.out:	-391.658	-195.242	-196.417	-195.242
37_Cyclopentane-Neopentane_1.25	1.48153	37_Cyclopentane-Neopentane_1.25	-393.624	-196.206	-197.415	-196.206	-197.415		1.48436	1.47919	1.48178	0.00516291		-393.617	-196.203	-197.412	-196.203	-197.412		1.48716	1.47119	1.47918	0.0159743		37_Cyclopentane-Neopentane_1.25	-393.66	-196.222	-197.437	-196.222	-197.437		1.0884	1.08336	1.08588	0.00503857			37_Cyclopentane-Neopentane_1.25	-391.663	-195.244	-196.419	-195.244	-196.419		37_Cyclopentane-Neopentane_1.25.out:	-391.659	-195.242	-196.417	-195.242
37_Cyclopentane-Neopentane_1.50	0.71648	37_Cyclopentane-Neopentane_1.50	-393.623	-196.206	-197.415	-196.206	-197.415		0.722959	0.720055	0.721507	0.00290456		-393.616	-196.203	-197.412	-196.203	-197.412		0.72385	0.715735	0.719792	0.00811525		37_Cyclopentane-Neopentane_1.50	-393.659	-196.222	-197.437	-196.222	-197.437		0.547505	0.544691	0.546098	0.0028144			37_Cyclopentane-Neopentane_1.50	-391.664	-195.244	-196.419	-195.244	-196.419		37_Cyclopentane-Neopentane_1.50.out:	-391.659	-195.242	-196.417	-195.242
37_Cyclopentane-Neopentane_2.00	0.194453	37_Cyclopentane-Neopentane_2.00	-393.622	-196.206	-197.415	-196.206	-197.415		0.200023	0.19837	0.199197	0.00165254		-393.615	-196.203	-197.412	-196.203	-197.412		0.199433	0.19666	0.198047	0.00277329		37_Cyclopentane-Neopentane_2.00	-393.659	-196.222	-197.437	-196.222	-197.437		0.152541	0.150945	0.151743	0.00159651			37_Cyclopentane-Neopentane_2.00	-391.664	-195.244	-196.419	-195.244	-196.419		37_Cyclopentane-Neopentane_2.00.out:	-391.659	-195.242	-196.417	-195.242
38_Cyclopentane-Cyclopentane_0.90	2.30091	38_Cyclopentane-Cyclopentane_0.90	-392.417	-196.206	-196.206	-196.206	-196.206		2.55794	2.54054	2.54924	0.0174024		-392.41	-196.203	-196.203	-196.203	-196.203		2.56712	2.51185	2.53949	0.0552643		38_Cyclopentane-Cyclopentane_0.90	-392.445	-196.222	-196.222	-196.222	-196.222		0.628076	0.610423	0.619249	0.0176536			38_Cyclopentane-Cyclopentane_0.90	-390.479	-195.244	-195.244	-195.244	-195.244		38_Cyclopentane-Cyclopentane_0.90.out:	-390.475	-195.242	-195.242	-195.242
38_Cyclopentane-Cyclopentane_0.95	2.89424	38_Cyclopentane-Cyclopentane_0.95	-392.417	-196.206	-196.206	-196.206	-196.206		3.05722	3.0424	3.04981	0.0148184		-392.411	-196.203	-196.203	-196.203	-196.203		3.06221	3.01687	3.03954	0.0453434		38_Cyclopentane-Cyclopentane_0.95	-392.446	-196.222	-196.222	-196.222	-196.222		1.48968	1.47473	1.48221	0.014952			38_Cyclopentane-Cyclopentane_0.95	-390.482	-195.244	-195.244	-195.244	-195.244		38_Cyclopentane-Cyclopentane_0.95.out:	-390.478	-195.242	-195.242	-195.242
38_Cyclopentane-Cyclopentane_1.00	3.03815	38_Cyclopentane-Cyclopentane_1.00	-392.418	-196.206	-196.206	-196.206	-196.206		3.13801	3.12561	3.13181	0.0124063		-392.411	-196.203	-196.203	-196.203	-196.203		3.14044	3.10367	3.12205	0.0367694		38_Cyclopentane-Cyclopentane_1.00	-392.447	-196.222	-196.222	-196.222	-196.222		1.88619	1.87375	1.87997	0.0124422			38_Cyclopentane-Cyclopentane_1.00	-390.485	-195.244	-195.244	-195.244	-195.244		38_Cyclopentane-Cyclopentane_1.00.out:	-390.481	-195.242	-195.242	-195.242
38_Cyclopentane-Cyclopentane_1.05	2.8931	38_Cyclopentane-Cyclopentane_1.05	-392.417	-196.206	-196.206	-196.206	-196.206		2.95692	2.94648	2.9517	0.0104418		-392.411	-196.203	-196.203	-196.203	-196.203		2.95825	2.92804	2.94314	0.0302129		38_Cyclopentane-Cyclopentane_1.05	-392.447	-196.222	-196.222	-196.222	-196.222		1.95456	1.94414	1.94935	0.0104113			38_Cyclopentane-Cyclopentane_1.05	-390.486	-195.244	-195.244	-195.244	-195.244		38_Cyclopentane-Cyclopentane_1.05.out:	-390.482	-195.242	-195.242	-195.242
38_Cyclopentane-Cyclopentane_1.10	2.62129	38_Cyclopentane-Cyclopentane_1.10	-392.417	-196.206	-196.206	-196.206	-196.206		2.66597	2.65717	2.66157	0.00879684		-392.41	-196.203	-196.203	-196.203	-196.203		2.66699	2.64174	2.65436	0.0252509		38_Cyclopentane-Cyclopentane_1.10	-392.447	-196.222	-196.222	-196.222	-196.222		1.85474	1.84602	1.85038	0.00872707			38_Cyclopentane-Cyclopentane_1.10	-390.487	-195.244	-195.244	-195.244	-195.244		38_Cyclopentane-Cyclopentane_1.10.out:	-390.483	-195.242	-195.242	-195.242
38_Cyclopentane-Cyclopentane_1.25	1.73072	38_Cyclopentane-Cyclopentane_1.25	-392.415	-196.206	-196.206	-196.206	-196.206		1.75622	1.75073	1.75347	0.00548966		-392.409	-196.203	-196.203	-196.203	-196.203		1.75683	1.74128	1.74905	0.0155469		38_Cyclopentane-Cyclopentane_1.25	-392.446	-196.222	-196.222	-196.222	-196.222		1.30299	1.29761	1.3003	0.00538172			38_Cyclopentane-Cyclopentane_1.25	-390.488	-195.244	-195.244	-195.244	-195.244		38_Cyclopentane-Cyclopentane_1.25.out:	-390.484	-195.242	-195.242	-195.242
38_Cyclopentane-Cyclopentane_1.50	0.803855	38_Cyclopentane-Cyclopentane_1.50	-392.414	-196.206	-196.206	-196.206	-196.206		0.822437	0.819712	0.821075	0.00272478		-392.407	-196.203	-196.203	-196.203	-196.203		0.822976	0.814891	0.818934	0.00808505		38_Cyclopentane-Cyclopentane_1.50	-392.445	-196.222	-196.222	-196.222	-196.222		0.625718	0.623085	0.624401	0.00263323			38_Cyclopentane-Cyclopentane_1.50	-390.489	-195.244	-195.244	-195.244	-195.244		38_Cyclopentane-Cyclopentane_1.50.out:	-390.484	-195.242	-195.242	-195.242
38_Cyclopentane-Cyclopentane_2.00	0.21123	38_Cyclopentane-Cyclopentane_2.00	-392.413	-196.206	-196.206	-196.206	-196.206		0.220822	0.219216	0.220019	0.00160548		-392.406	-196.203	-196.203	-196.203	-196.203		0.220703	0.217986	0.219344	0.00271673		38_Cyclopentane-Cyclopentane_2.00	-392.444	-196.222	-196.222	-196.222	-196.222		0.168594	0.167039	0.167816	0.00155441			38_Cyclopentane-Cyclopentane_2.00	-390.489	-195.244	-195.244	-195.244	-195.244		38_Cyclopentane-Cyclopentane_2.00.out:	-390.485	-195.242	-195.242	-195.242
39_Benzene-Cyclopentane_0.90	2.14254	39_Benzene-Cyclopentane_0.90	-428.066	-231.853	-196.206	-231.853	-196.206		3.91386	3.87251	3.89318	0.0413544		-428.059	-231.85	-196.203	-231.85	-196.203		3.98851	3.83161	3.91006	0.1569		39_Benzene-Cyclopentane_0.90	-428.073	-231.849	-196.222	-231.849	-196.222		1.28547	1.24488	1.26517	0.0405909			39_Benzene-Cyclopentane_0.90	-426.028	-230.797	-195.244	-230.797	-195.244		39_Benzene-Cyclopentane_0.90.out:	-426.024	-230.795	-195.242	-230.795
39_Benzene-Cyclopentane_0.95	3.24254	39_Benzene-Cyclopentane_0.95	-428.067	-231.853	-196.206	-231.853	-196.206		4.61204	4.57522	4.59363	0.0368194		-428.06	-231.85	-196.203	-231.85	-196.203		4.67703	4.53765	4.60734	0.139377		39_Benzene-Cyclopentane_0.95	-428.075	-231.849	-196.222	-231.849	-196.222		2.50614	2.47017	2.48815	0.0359703			39_Benzene-Cyclopentane_0.95	-426.033	-230.797	-195.244	-230.797	-195.244		39_Benzene-Cyclopentane_0.95.out:	-426.029	-230.795	-195.242	-230.795
39_Benzene-Cyclopentane_1.00	3.58357	39_Benzene-Cyclopentane_1.00	-428.067	-231.853	-196.206	-231.853	-196.206		4.64533	4.61259	4.62896	0.0327371		-428.06	-231.85	-196.203	-231.85	-196.203		4.70166	4.57808	4.63987	0.123579		39_Benzene-Cyclopentane_1.00	-428.076	-231.849	-196.222	-231.849	-196.222		2.96246	2.93061	2.94653	0.0318528			39_Benzene-Cyclopentane_1.00	-426.037	-230.797	-195.244	-230.797	-195.244		39_Benzene-Cyclopentane_1.00.out:	-426.032	-230.795	-195.242	-230.795
39_Benzene-Cyclopentane_1.05	3.49181	39_Benzene-Cyclopentane_1.05	-428.067	-231.853	-196.206	-231.853	-196.206		4.31994	4.29083	4.30539	0.0291088		-428.059	-231.85	-196.203	-231.85	-196.203		4.36826	4.25943	4.31385	0.108833		39_Benzene-Cyclopentane_1.05	-428.076	-231.849	-196.222	-231.849	-196.222		2.97675	2.94852	2.96263	0.0282273			39_Benzene-Cyclopentane_1.05	-426.039	-230.797	-195.244	-230.797	-195.244		39_Benzene-Cyclopentane_1.05.out:	-426.034	-230.795	-195.242	-230.795
39_Benzene-Cyclopentane_1.10	3.19344	39_Benzene-Cyclopentane_1.10	-428.066	-231.853	-196.206	-231.853	-196.206		3.84952	3.82347	3.8365	0.0260524		-428.059	-231.85	-196.203	-231.85	-196.203		3.89039	3.79521	3.8428	0.0951801		39_Benzene-Cyclopentane_1.10	-428.076	-231.849	-196.222	-231.849	-196.222		2.76966	2.74446	2.75706	0.0251948			39_Benzene-Cyclopentane_1.10	-426.04	-230.797	-195.244	-230.797	-195.244		39_Benzene-Cyclopentane_1.10.out:	-426.036	-230.795	-195.242	-230.795
39_Benzene-Cyclopentane_1.25	2.09435	39_Benzene-Cyclopentane_1.25	-428.064	-231.853	-196.206	-231.853	-196.206		2.44538	2.42644	2.43591	0.0189357		-428.056	-231.85	-196.203	-231.85	-196.203		2.46795	2.40676	2.43736	0.0611924		39_Benzene-Cyclopentane_1.25	-428.074	-231.849	-196.222	-231.849	-196.222		1.86215	1.84397	1.85306	0.0181791			39_Benzene-Cyclopentane_1.25	-426.042	-230.797	-195.244	-230.797	-195.244		39_Benzene-Cyclopentane_1.25.out:	-426.037	-230.795	-195.242	-230.795
39_Benzene-Cyclopentane_1.50	0.91841	39_Benzene-Cyclopentane_1.50	-428.061	-231.853	-196.206	-231.853	-196.206		1.06022	1.05022	1.05522	0.0100019		-428.054	-231.85	-196.203	-231.85	-196.203		1.07083	1.04055	1.05569	0.030283		39_Benzene-Cyclopentane_1.50	-428.072	-231.849	-196.222	-231.849	-196.222		0.828741	0.819304	0.824022	0.00943754			39_Benzene-Cyclopentane_1.50	-426.042	-230.797	-195.244	-230.797	-195.244		39_Benzene-Cyclopentane_1.50.out:	-426.037	-230.795	-195.242	-230.795
39_Benzene-Cyclopentane_2.00	0.199481	39_Benzene-Cyclopentane_2.00	-428.06	-231.853	-196.206	-231.853	-196.206		0.230412	0.22587	0.228141	0.00454179		-428.053	-231.85	-196.203	-231.85	-196.203		0.235735	0.223566	0.22965	0.0121685		39_Benzene-Cyclopentane_2.00	-428.071	-231.849	-196.222	-231.849	-196.222		0.182838	0.178488	0.180663	0.00434995			39_Benzene-Cyclopentane_2.00	-426.042	-230.797	-195.244	-230.797	-195.244		39_Benzene-Cyclopentane_2.00.out:	-426.037	-230.795	-195.242	-230.795
40_Benzene-Neopentane_0.90	1.85878	40_Benzene-Neopentane_0.90	-429.274	-231.853	-197.415	-231.853	-197.415		3.08276	3.04609	3.06442	0.0366697		-429.266	-231.85	-197.412	-231.85	-197.412		3.15922	3.01477	3.08699	0.144454		40_Benzene-Neopentane_0.90	-429.288	-231.849	-197.437	-231.849	-197.437		1.09569	1.05987	1.07778	0.0358211			40_Benzene-Neopentane_0.90	-427.207	-230.797	-196.419	-230.797	-196.419		40_Benzene-Neopentane_0.90.out:	-427.202	-230.795	-196.417	-230.795
40_Benzene-Neopentane_0.95	2.68281	40_Benzene-Neopentane_0.95	-429.275	-231.853	-197.415	-231.853	-197.415		3.62191	3.58923	3.60557	0.0326767		-429.267	-231.85	-197.412	-231.85	-197.412		3.68966	3.56086	3.62526	0.128799		40_Benzene-Neopentane_0.95	-429.289	-231.849	-197.437	-231.849	-197.437		2.0368	2.00503	2.02091	0.0317643			40_Benzene-Neopentane_0.95	-427.211	-230.797	-196.419	-230.797	-196.419		40_Benzene-Neopentane_0.95.out:	-427.206	-230.795	-196.417	-230.795
40_Benzene-Neopentane_1.00	2.90941	40_Benzene-Neopentane_1.00	-429.275	-231.853	-197.415	-231.853	-197.415		3.64041	3.61108	3.62575	0.0293284		-429.267	-231.85	-197.412	-231.85	-197.412		3.69981	3.585	3.64241	0.11481		40_Benzene-Neopentane_1.00	-429.29	-231.849	-197.437	-231.849	-197.437		2.36853	2.34012	2.35432	0.0284098			40_Benzene-Neopentane_1.00	-427.213	-230.797	-196.419	-230.797	-196.419		40_Benzene-Neopentane_1.00.out:	-427.209	-230.795	-196.417	-230.795
40_Benzene-Neopentane_1.05	2.82401	40_Benzene-Neopentane_1.05	-429.274	-231.853	-197.415	-231.853	-197.415		3.40119	3.37483	3.38801	0.0263594		-429.267	-231.85	-197.412	-231.85	-197.412		3.45236	3.3509	3.40163	0.101457		40_Benzene-Neopentane_1.05	-429.29	-231.849	-197.437	-231.849	-197.437		2.37536	2.34989	2.36263	0.0254667			40_Benzene-Neopentane_1.05	-427.215	-230.797	-196.419	-230.797	-196.419		40_Benzene-Neopentane_1.05.out:	-427.21	-230.795	-196.417	-230.795
40_Benzene-Neopentane_1.10	2.59065	40_Benzene-Neopentane_1.10	-429.274	-231.853	-197.415	-231.853	-197.415		3.05269	3.02896	3.04082	0.0237259		-429.266	-231.85	-197.412	-231.85	-197.412		3.09591	3.00726	3.05158	0.0886509		40_Benzene-Neopentane_1.10	-429.29	-231.849	-197.437	-231.849	-197.437		2.22074	2.19787	2.2093	0.0228714			40_Benzene-Neopentane_1.10	-427.216	-230.797	-196.419	-230.797	-196.419		40_Benzene-Neopentane_1.10.out:	-427.211	-230.795	-196.417	-230.795
40_Benzene-Neopentane_1.25	1.72948	40_Benzene-Neopentane_1.25	-429.272	-231.853	-197.415	-231.853	-197.415		1.98129	1.96371	1.9725	0.0175708		-429.265	-231.85	-197.412	-231.85	-197.412		2.00442	1.94785	1.97613	0.0565667		40_Benzene-Neopentane_1.25	-429.288	-231.849	-197.437	-231.849	-197.437		1.52341	1.50656	1.51498	0.0168509			40_Benzene-Neopentane_1.25	-427.217	-230.797	-196.419	-230.797	-196.419		40_Benzene-Neopentane_1.25.out:	-427.212	-230.795	-196.417	-230.795
40_Benzene-Neopentane_1.50	0.786207	40_Benzene-Neopentane_1.50	-429.27	-231.853	-197.415	-231.853	-197.415		0.891723	0.882295	0.887009	0.00942793		-429.263	-231.85	-197.412	-231.85	-197.412		0.902899	0.874334	0.888616	0.0285648		40_Benzene-Neopentane_1.50	-429.287	-231.849	-197.437	-231.849	-197.437		0.704172	0.695275	0.699723	0.0088976			40_Benzene-Neopentane_1.50	-427.217	-230.797	-196.419	-230.797	-196.419		40_Benzene-Neopentane_1.50.out:	-427.212	-230.795	-196.417	-230.795
40_Benzene-Neopentane_2.00	0.195601	40_Benzene-Neopentane_2.00	-429.269	-231.853	-197.415	-231.853	-197.415		0.222603	0.219082	0.220842	0.00352096		-429.262	-231.85	-197.412	-231.85	-197.412		0.228695	0.216847	0.222771	0.0118478		40_Benzene-Neopentane_2.00	-429.286	-231.849	-197.437	-231.849	-197.437		0.178529	0.175182	0.176856	0.0033465			40_Benzene-Neopentane_2.00	-427.217	-230.797	-196.419	-230.797	-196.419		40_Benzene-Neopentane_2.00.out:	-427.212	-230.795	-196.417	-230.795
41_Uracil-Pentane_0.90	3.93232	41_Uracil-Pentane_0.90	-611.735	-414.32	-197.408	-414.32	-197.408		4.87674	4.7961	4.83642	0.0806402		-611.723	-414.312	-197.404	-414.311	-197.404		4.96232	4.73945	4.85089	0.222863		41_Uracil-Pentane_0.90	-611.733	-414.299	-197.431	-414.299	-197.431		1.97614	1.89859	1.93736	0.0775541			41_Uracil-Pentane_0.90	-609.062	-412.656	-196.419	-412.656	-196.419		41_Uracil-Pentane_0.90.out:	-609.055	-412.651	-196.417	-412.651
41_Uracil-Pentane_0.95	4.79242	41_Uracil-Pentane_0.95	-611.736	-414.32	-197.408	-414.32	-197.408		5.49273	5.41937	5.45605	0.073369		-611.724	-414.312	-197.404	-414.311	-197.404		5.56669	5.3678	5.46724	0.198891		41_Uracil-Pentane_0.95	-611.735	-414.299	-197.431	-414.299	-197.431		3.14003	3.06974	3.10489	0.0702868			41_Uracil-Pentane_0.95	-609.067	-412.656	-196.419	-412.656	-196.419		41_Uracil-Pentane_0.95.out:	-609.06	-412.651	-196.417	-412.651
41_Uracil-Pentane_1.00	4.93376	41_Uracil-Pentane_1.00	-611.736	-414.32	-197.408	-414.32	-197.408		5.4592	5.39283	5.42601	0.0663659		-611.724	-414.312	-197.404	-414.311	-197.404		5.52344	5.34614	5.43479	0.177305		41_Uracil-Pentane_1.00	-611.736	-414.299	-197.431	-414.299	-197.431		3.5454	3.48202	3.51371	0.0633784			41_Uracil-Pentane_1.00	-609.07	-412.656	-196.419	-412.656	-196.419		41_Uracil-Pentane_1.00.out:	-609.063	-412.651	-196.417	-412.651
41_Uracil-Pentane_1.05	4.68928	41_Uracil-Pentane_1.05	-611.736	-414.32	-197.408	-414.32	-197.408		5.08814	5.02849	5.05831	0.0596469		-611.724	-414.312	-197.404	-414.311	-197.404		5.14379	4.98644	5.06512	0.157346		41_Uracil-Pentane_1.05	-611.736	-414.299	-197.431	-414.299	-197.431		3.5282	3.47139	3.49979	0.056809			41_Uracil-Pentane_1.05	-609.072	-412.656	-196.419	-412.656	-196.419		41_Uracil-Pentane_1.05.out:	-609.065	-412.651	-196.417	-412.651
41_Uracil-Pentane_1.10	4.1628	41_Uracil-Pentane_1.10	-611.735	-414.32	-197.408	-414.32	-197.408		4.45466	4.40252	4.42859	0.0521449		-611.723	-414.312	-197.404	-414.311	-197.404		4.5009	4.36562	4.43326	0.135278		41_Uracil-Pentane_1.10	-611.735	-414.299	-197.431	-414.299	-197.431		3.2294	3.17985	3.20462	0.0495496			41_Uracil-Pentane_1.10	-609.073	-412.656	-196.419	-412.656	-196.419		41_Uracil-Pentane_1.10.out:	-609.067	-412.651	-196.417	-412.651
41_Uracil-Pentane_1.25	2.50794	41_Uracil-Pentane_1.25	-611.732	-414.32	-197.408	-414.32	-197.408		2.64291	2.60777	2.62534	0.0351401		-611.72	-414.312	-197.404	-414.311	-197.404		2.66751	2.58298	2.62525	0.0845395		41_Uracil-Pentane_1.25	-611.733	-414.299	-197.431	-414.299	-197.431		2.01903	1.98568	2.00236	0.0333449			41_Uracil-Pentane_1.25	-609.075	-412.656	-196.419	-412.656	-196.419		41_Uracil-Pentane_1.25.out:	-609.068	-412.651	-196.417	-412.651
41_Uracil-Pentane_1.50	1.01178	41_Uracil-Pentane_1.50	-611.729	-414.32	-197.408	-414.32	-197.408		1.06885	1.04932	1.05908	0.0195343		-611.717	-414.312	-197.404	-414.311	-197.404		1.07865	1.03759	1.05812	0.0410577		41_Uracil-Pentane_1.50	-611.731	-414.299	-197.431	-414.299	-197.431		0.831287	0.812703	0.821995	0.0185841			41_Uracil-Pentane_1.50	-609.075	-412.656	-196.419	-412.656	-196.419		41_Uracil-Pentane_1.50.out:	-609.068	-412.651	-196.417	-412.651
41_Uracil-Pentane_2.00	0.227902	41_Uracil-Pentane_2.00	-611.728	-414.32	-197.408	-414.32	-197.408		0.240779	0.235585	0.238182	0.00519387		-611.716	-414.311	-197.404	-414.311	-197.404		0.243893	0.232441	0.238167	0.0114514		41_Uracil-Pentane_2.00	-611.73	-414.299	-197.431	-414.299	-197.431		0.187749	0.182762	0.185255	0.00498688			41_Uracil-Pentane_2.00	-609.075	-412.656	-196.419	-412.656	-196.419		41_Uracil-Pentane_2.00.out:	-609.068	-412.651	-196.417	-412.651
42_Uracil-Cyclopentane_0.90	3.14593	42_Uracil-Cyclopentane_0.90	-610.533	-414.32	-196.206	-414.32	-196.206		4.07563	4.00031	4.03797	0.0753186		-610.521	-414.312	-196.203	-414.311	-196.203		4.15258	3.94659	4.04958	0.205991		42_Uracil-Cyclopentane_0.90	-610.523	-414.299	-196.222	-414.299	-196.222		1.45072	1.3784	1.41456	0.0723239			42_Uracil-Cyclopentane_0.90	-607.888	-412.656	-195.244	-412.656	-195.244		42_Uracil-Cyclopentane_0.90.out:	-607.881	-412.651	-195.242	-412.651
42_Uracil-Cyclopentane_0.95	4.06178	42_Uracil-Cyclopentane_0.95	-610.534	-414.32	-196.206	-414.32	-196.206		4.73558	4.66784	4.70171	0.0677418		-610.522	-414.312	-196.203	-414.311	-196.203		4.80071	4.61872	4.70972	0.181993		42_Uracil-Cyclopentane_0.95	-610.525	-414.299	-196.222	-414.299	-196.222		2.64231	2.57755	2.60993	0.0647636			42_Uracil-Cyclopentane_0.95	-607.893	-412.656	-195.244	-412.656	-195.244		42_Uracil-Cyclopentane_0.95.out:	-607.886	-412.651	-195.242	-412.651
42_Uracil-Cyclopentane_1.00	4.22087	42_Uracil-Cyclopentane_1.00	-610.534	-414.32	-196.206	-414.32	-196.206		4.71898	4.65804	4.68851	0.0609375		-610.522	-414.312	-196.203	-414.311	-196.203		4.77432	4.61348	4.6939	0.160843		42_Uracil-Cyclopentane_1.00	-610.526	-414.299	-196.222	-414.299	-196.222		3.0388	2.98075	3.00977	0.0580493			42_Uracil-Cyclopentane_1.00	-607.896	-412.656	-195.244	-412.656	-195.244		42_Uracil-Cyclopentane_1.00.out:	-607.889	-412.651	-195.242	-412.651
42_Uracil-Cyclopentane_1.05	4.00123	42_Uracil-Cyclopentane_1.05	-610.533	-414.32	-196.206	-414.32	-196.206		4.37766	4.32271	4.35019	0.0549483		-610.521	-414.312	-196.203	-414.311	-196.203		4.42457	4.28286	4.35371	0.141713		42_Uracil-Cyclopentane_1.05	-610.526	-414.299	-196.222	-414.299	-196.222		3.02131	2.9691	2.9952	0.052205			42_Uracil-Cyclopentane_1.05	-607.898	-412.656	-195.244	-412.656	-195.244		42_Uracil-Cyclopentane_1.05.out:	-607.891	-412.651	-195.242	-412.651
42_Uracil-Cyclopentane_1.10	3.61506	42_Uracil-Cyclopentane_1.10	-610.532	-414.32	-196.206	-414.32	-196.206		3.90591	3.85663	3.88127	0.0492776		-610.521	-414.312	-196.203	-414.311	-196.203		3.9455	3.82119	3.88334	0.12431		42_Uracil-Cyclopentane_1.10	-610.526	-414.299	-196.222	-414.299	-196.222		2.80435	2.75762	2.78098	0.0467275			42_Uracil-Cyclopentane_1.10	-607.899	-412.656	-195.244	-412.656	-195.244		42_Uracil-Cyclopentane_1.10.out:	-607.892	-412.651	-195.242	-412.651
42_Uracil-Cyclopentane_1.25	2.35201	42_Uracil-Cyclopentane_1.25	-610.53	-414.32	-196.206	-414.32	-196.206		2.50372	2.4685	2.48611	0.0352137		-610.518	-414.312	-196.203	-414.311	-196.203		2.52599	2.444	2.485	0.0819938		42_Uracil-Cyclopentane_1.25	-610.524	-414.299	-196.222	-414.299	-196.222		1.89351	1.86019	1.87685	0.033316			42_Uracil-Cyclopentane_1.25	-607.9	-412.656	-195.244	-412.656	-195.244		42_Uracil-Cyclopentane_1.25.out:	-607.893	-412.651	-195.242	-412.651
42_Uracil-Cyclopentane_1.50	1.05203	42_Uracil-Cyclopentane_1.50	-610.528	-414.32	-196.206	-414.32	-196.206		1.11885	1.09888	1.10887	0.0199645		-610.516	-414.312	-196.203	-414.311	-196.203		1.12791	1.08647	1.10719	0.0414424		42_Uracil-Cyclopentane_1.50	-610.523	-414.299	-196.222	-414.299	-196.222		0.865388	0.846454	0.855921	0.0189339			42_Uracil-Cyclopentane_1.50	-607.9	-412.656	-195.244	-412.656	-195.244		42_Uracil-Cyclopentane_1.50.out:	-607.894	-412.651	-195.242	-412.651
42_Uracil-Cyclopentane_2.00	0.262721	42_Uracil-Cyclopentane_2.00	-610.527	-414.32	-196.206	-414.32	-196.206		0.279888	0.272735	0.276312	0.00715379		-610.515	-414.311	-196.203	-414.311	-196.203		0.283916	0.269498	0.276707	0.0144184		42_Uracil-Cyclopentane_2.00	-610.521	-414.299	-196.222	-414.299	-196.222		0.219178	0.212287	0.215732	0.00689009			42_Uracil-Cyclopentane_2.00	-607.9	-412.656	-195.244	-412.656	-195.244		42_Uracil-Cyclopentane_2.00.out:	-607.894	-412.651	-195.242	-412.651
43_Uracil-Neopentane_0.90	2.95433	43_Uracil-Neopentane_0.90	-611.741	-414.32	-197.415	-414.32	-197.415		3.49901	3.43464	3.46683	0.0643688		-611.729	-414.312	-197.412	-414.311	-197.412		3.5681	3.38932	3.47871	0.178785		43_Uracil-Neopentane_0.90	-611.738	-414.299	-197.437	-414.299	-197.437		1.46834	1.40658	1.43746	0.0617602			43_Uracil-Neopentane_0.90	-609.066	-412.656	-196.419	-412.656	-196.419		43_Uracil-Neopentane_0.90.out:	-609.059	-412.651	-196.417	-412.651
43_Uracil-Neopentane_0.95	3.68368	43_Uracil-Neopentane_0.95	-611.742	-414.32	-197.415	-414.32	-197.415		4.06804	4.01003	4.03904	0.0580052		-611.73	-414.312	-197.412	-414.311	-197.412		4.12682	3.96892	4.04787	0.157902		43_Uracil-Neopentane_0.95	-611.74	-414.299	-197.437	-414.299	-197.437		2.44468	2.3892	2.41694	0.0554782			43_Uracil-Neopentane_0.95	-609.07	-412.656	-196.419	-412.656	-196.419		43_Uracil-Neopentane_0.95.out:	-609.063	-412.651	-196.417	-412.651
43_Uracil-Neopentane_1.00	3.78166	43_Uracil-Neopentane_1.00	-611.742	-414.32	-197.415	-414.32	-197.415		4.05669	4.00498	4.03084	0.0517152		-611.73	-414.312	-197.412	-414.311	-197.412		4.10688	3.96732	4.0371	0.139564		43_Uracil-Neopentane_1.00	-611.74	-414.299	-197.437	-414.299	-197.437		2.75039	2.70105	2.72572	0.0493454			43_Uracil-Neopentane_1.00	-609.072	-412.656	-196.419	-412.656	-196.419		43_Uracil-Neopentane_1.00.out:	-609.066	-412.651	-196.417	-412.651
43_Uracil-Neopentane_1.05	3.56649	43_Uracil-Neopentane_1.05	-611.741	-414.32	-197.415	-414.32	-197.415		3.76783	3.72107	3.74445	0.046757		-611.729	-414.312	-197.412	-414.311	-197.412		3.81094	3.68772	3.74933	0.123216		43_Uracil-Neopentane_1.05	-611.74	-414.299	-197.437	-414.299	-197.437		2.71069	2.66617	2.68843	0.0445266			43_Uracil-Neopentane_1.05	-609.074	-412.656	-196.419	-412.656	-196.419		43_Uracil-Neopentane_1.05.out:	-609.067	-412.651	-196.417	-412.651
43_Uracil-Neopentane_1.10	3.21715	43_Uracil-Neopentane_1.10	-611.74	-414.32	-197.415	-414.32	-197.415		3.36767	3.3256	3.34664	0.0420673		-611.729	-414.312	-197.412	-414.311	-197.412		3.40459	3.29605	3.35032	0.108537		43_Uracil-Neopentane_1.10	-611.74	-414.299	-197.437	-414.299	-197.437		2.50719	2.46716	2.48717	0.0400247			43_Uracil-Neopentane_1.10	-609.074	-412.656	-196.419	-412.656	-196.419		43_Uracil-Neopentane_1.10.out:	-609.068	-412.651	-196.417	-412.651
43_Uracil-Neopentane_1.25	2.10216	43_Uracil-Neopentane_1.25	-611.739	-414.32	-197.415	-414.32	-197.415		2.17522	2.14457	2.1599	0.0306577		-611.727	-414.312	-197.412	-414.311	-197.412		2.19719	2.12425	2.16072	0.072942		43_Uracil-Neopentane_1.25	-611.739	-414.299	-197.437	-414.299	-197.437		1.69582	1.66674	1.68128	0.0290864			43_Uracil-Neopentane_1.25	-609.075	-412.656	-196.419	-412.656	-196.419		43_Uracil-Neopentane_1.25.out:	-609.069	-412.651	-196.417	-412.651
43_Uracil-Neopentane_1.50	0.955087	43_Uracil-Neopentane_1.50	-611.737	-414.32	-197.415	-414.32	-197.415		0.987613	0.96979	0.978701	0.0178225		-611.725	-414.311	-197.412	-414.311	-197.412		0.99578	0.95874	0.97726	0.0370402		43_Uracil-Neopentane_1.50	-611.737	-414.299	-197.437	-414.299	-197.437		0.787116	0.770231	0.778673	0.0168856			43_Uracil-Neopentane_1.50	-609.075	-412.656	-196.419	-412.656	-196.419		43_Uracil-Neopentane_1.50.out:	-609.069	-412.651	-196.417	-412.651
43_Uracil-Neopentane_2.00	0.243577	43_Uracil-Neopentane_2.00	-611.736	-414.32	-197.415	-414.32	-197.415		0.251271	0.245643	0.248457	0.00562813		-611.724	-414.311	-197.412	-414.311	-197.412		0.254809	0.24297	0.248889	0.0118391		43_Uracil-Neopentane_2.00	-611.736	-414.299	-197.437	-414.299	-197.437		0.202666	0.197247	0.199956	0.00541969			43_Uracil-Neopentane_2.00	-609.075	-412.656	-196.419	-412.656	-196.419		43_Uracil-Neopentane_2.00.out:	-609.068	-412.651	-196.417	-412.651
44_Ethene-Pentane_0.90	1.64737	44_Ethene-Pentane_0.90	-275.854	-78.4429	-197.408	-78.4429	-197.408		1.92343	1.9037	1.91356	0.0197297		-275.849	-78.4416	-197.404	-78.4415	-197.404		1.93756	1.87486	1.90621	0.0626963		44_Ethene-Pentane_0.90	-275.885	-78.453	-197.431	-78.453	-197.431		0.688802	0.669076	0.678939	0.0197264			44_Ethene-Pentane_0.90	-274.484	-78.0706	-196.419	-78.0706	-196.419		44_Ethene-Pentane_0.90.out:	-274.481	-78.0697	-196.417	-78.0697
44_Ethene-Pentane_0.95	1.96622	44_Ethene-Pentane_0.95	-275.854	-78.4429	-197.408	-78.4429	-197.408		2.1573	2.13983	2.14857	0.0174753		-275.849	-78.4415	-197.404	-78.4415	-197.404		2.16809	2.1138	2.14095	0.0542924		44_Ethene-Pentane_0.95	-275.886	-78.453	-197.431	-78.453	-197.431		1.17674	1.15938	1.16806	0.0173567			44_Ethene-Pentane_0.95	-274.486	-78.0706	-196.419	-78.0706	-196.419		44_Ethene-Pentane_0.95.out:	-274.483	-78.0697	-196.417	-78.0697
44_Ethene-Pentane_1.00	1.98672	44_Ethene-Pentane_1.00	-275.854	-78.4429	-197.408	-78.4429	-197.408		2.12326	2.1077	2.11548	0.0155614		-275.849	-78.4415	-197.404	-78.4415	-197.404		2.13155	2.08441	2.10798	0.0471455		44_Ethene-Pentane_1.00	-275.886	-78.453	-197.431	-78.453	-197.431		1.33803	1.32267	1.33035	0.0153564			44_Ethene-Pentane_1.00	-274.487	-78.0706	-196.419	-78.0706	-196.419		44_Ethene-Pentane_1.00.out:	-274.484	-78.0697	-196.417	-78.0697
44_Ethene-Pentane_1.05	1.86125	44_Ethene-Pentane_1.05	-275.854	-78.4429	-197.408	-78.4429	-197.408		1.96241	1.9485	1.95546	0.0139094		-275.849	-78.4415	-197.404	-78.4415	-197.404		1.96885	1.92777	1.94831	0.0410831		44_Ethene-Pentane_1.05	-275.886	-78.453	-197.431	-78.453	-197.431		1.32908	1.31543	1.32226	0.0136426			44_Ethene-Pentane_1.05	-274.488	-78.0706	-196.419	-78.0706	-196.419		44_Ethene-Pentane_1.05.out:	-274.485	-78.0697	-196.417	-78.0697
44_Ethene-Pentane_1.10	1.67396	44_Ethene-Pentane_1.10	-275.853	-78.4429	-197.408	-78.4429	-197.408		1.75182	1.73935	1.74558	0.012478		-275.848	-78.4415	-197.404	-78.4415	-197.404		1.75688	1.72097	1.73892	0.0359145		44_Ethene-Pentane_1.10	-275.886	-78.453	-197.431	-78.453	-197.431		1.23735	1.22518	1.23127	0.012169			44_Ethene-Pentane_1.10	-274.489	-78.0706	-196.419	-78.0706	-196.419		44_Ethene-Pentane_1.10.out:	-274.486	-78.0697	-196.417	-78.0697
44_Ethene-Pentane_1.25	1.09294	44_Ethene-Pentane_1.25	-275.852	-78.4429	-197.408	-78.4429	-197.408		1.13529	1.12612	1.1307	0.00917681		-275.847	-78.4415	-197.404	-78.4415	-197.404		1.1378	1.11325	1.12553	0.0245472		44_Ethene-Pentane_1.25	-275.885	-78.453	-197.431	-78.453	-197.431		0.848751	0.839944	0.844348	0.00880729			44_Ethene-Pentane_1.25	-274.49	-78.0706	-196.419	-78.0706	-196.419		44_Ethene-Pentane_1.25.out:	-274.486	-78.0697	-196.417	-78.0697
44_Ethene-Pentane_1.50	0.49698	44_Ethene-Pentane_1.50	-275.851	-78.4429	-197.408	-78.4429	-197.408		0.516925	0.511281	0.514103	0.00564363		-275.846	-78.4415	-197.404	-78.4415	-197.404		0.518873	0.504229	0.511551	0.0146437		44_Ethene-Pentane_1.50	-275.884	-78.453	-197.431	-78.453	-197.431		0.396143	0.39084	0.393492	0.00530381			44_Ethene-Pentane_1.50	-274.49	-78.0706	-196.419	-78.0706	-196.419		44_Ethene-Pentane_1.50.out:	-274.487	-78.0697	-196.417	-78.0697
44_Ethene-Pentane_2.00	0.123279	44_Ethene-Pentane_2.00	-275.851	-78.4429	-197.408	-78.4429	-197.408		0.129757	0.127543	0.12865	0.00221372		-275.846	-78.4415	-197.404	-78.4415	-197.404		0.131654	0.125825	0.128739	0.00582999		44_Ethene-Pentane_2.00	-275.884	-78.453	-197.431	-78.453	-197.431		0.1	0.097975	0.0989877	0.00202529			44_Ethene-Pentane_2.00	-274.49	-78.0706	-196.419	-78.0706	-196.419		44_Ethene-Pentane_2.00.out:	-274.487	-78.0697	-196.417	-78.0697
45_Ethyne-Pentane_0.90	1.04531	45_Ethyne-Pentane_0.90	-274.611	-77.2003	-197.408	-77.2003	-197.408		1.78036	1.74379	1.76208	0.0365771		-274.606	-77.199	-197.404	-77.1987	-197.404		1.85092	1.70931	1.78011	0.141611		45_Ethyne-Pentane_0.90	-274.636	-77.2043	-197.431	-77.2042	-197.431		0.563545	0.527444	0.545494	0.0361001			45_Ethyne-Pentane_0.90	-273.267	-76.8545	-196.419	-76.8545	-196.419		45_Ethyne-Pentane_0.90.out:	-273.264	-76.8537	-196.417	-76.8537
45_Ethyne-Pentane_0.95	1.56349	45_Ethyne-Pentane_0.95	-274.611	-77.2003	-197.408	-77.2003	-197.408		2.12288	2.08936	2.10612	0.0335165		-274.606	-77.1989	-197.404	-77.1987	-197.404		2.18586	2.05715	2.12151	0.128709		45_Ethyne-Pentane_0.95	-274.637	-77.2043	-197.431	-77.2042	-197.431		1.16625	1.13337	1.14981	0.0328859			45_Ethyne-Pentane_0.95	-273.27	-76.8545	-196.419	-76.8545	-196.419		45_Ethyne-Pentane_0.95.out:	-273.267	-76.8537	-196.417	-76.8537
45_Ethyne-Pentane_1.00	1.69762	45_Ethyne-Pentane_1.00	-274.611	-77.2003	-197.408	-77.2003	-197.408		2.12933	2.09854	2.11393	0.0307925		-274.606	-77.1989	-197.404	-77.1987	-197.404		2.18554	2.06827	2.12691	0.117277		45_Ethyne-Pentane_1.00	-274.637	-77.2042	-197.431	-77.2042	-197.431		1.37264	1.34259	1.35762	0.0300482			45_Ethyne-Pentane_1.00	-273.271	-76.8545	-196.419	-76.8545	-196.419		45_Ethyne-Pentane_1.00.out:	-273.268	-76.8537	-196.417	-76.8537
45_Ethyne-Pentane_1.05	1.63779	45_Ethyne-Pentane_1.05	-274.611	-77.2003	-197.408	-77.2003	-197.408		1.97534	1.94702	1.96118	0.0283212		-274.606	-77.1989	-197.404	-77.1987	-197.404		2.02542	1.9185	1.97196	0.106912		45_Ethyne-Pentane_1.05	-274.637	-77.2042	-197.431	-77.2042	-197.431		1.3735	1.34601	1.35975	0.0274993			45_Ethyne-Pentane_1.05	-273.272	-76.8545	-196.419	-76.8545	-196.419		45_Ethyne-Pentane_1.05.out:	-273.269	-76.8537	-196.417	-76.8537
45_Ethyne-Pentane_1.10	1.48983	45_Ethyne-Pentane_1.10	-274.611	-77.2003	-197.408	-77.2003	-197.408		1.75716	1.7311	1.74413	0.0260638		-274.606	-77.1989	-197.404	-77.1987	-197.404		1.8015	1.70419	1.75285	0.0973072		45_Ethyne-Pentane_1.10	-274.637	-77.2042	-197.431	-77.2042	-197.431		1.27571	1.25052	1.26312	0.0251924			45_Ethyne-Pentane_1.10	-273.273	-76.8545	-196.419	-76.8545	-196.419		45_Ethyne-Pentane_1.10.out:	-273.27	-76.8537	-196.417	-76.8537
45_Ethyne-Pentane_1.25	0.966266	45_Ethyne-Pentane_1.25	-274.61	-77.2003	-197.408	-77.2003	-197.408		1.10765	1.08734	1.0975	0.0203126		-274.605	-77.1989	-197.404	-77.1987	-197.404		1.13678	1.0648	1.10079	0.0719762		45_Ethyne-Pentane_1.25	-274.636	-77.2042	-197.431	-77.2042	-197.431		0.852866	0.833474	0.84317	0.0193925			45_Ethyne-Pentane_1.25	-273.274	-76.8545	-196.419	-76.8545	-196.419		45_Ethyne-Pentane_1.25.out:	-273.27	-76.8537	-196.417	-76.8537
45_Ethyne-Pentane_1.50	0.420584	45_Ethyne-Pentane_1.50	-274.609	-77.2003	-197.408	-77.2003	-197.408		0.477618	0.464373	0.470995	0.0132443		-274.604	-77.1988	-197.404	-77.1987	-197.404		0.494245	0.450407	0.472326	0.0438383		45_Ethyne-Pentane_1.50	-274.636	-77.2042	-197.431	-77.2042	-197.431		0.379413	0.366962	0.373188	0.0124508			45_Ethyne-Pentane_1.50	-273.274	-76.8545	-196.419	-76.8545	-196.419		45_Ethyne-Pentane_1.50.out:	-273.271	-76.8537	-196.417	-76.8537
45_Ethyne-Pentane_2.00	0.0981162	45_Ethyne-Pentane_2.00	-274.608	-77.2003	-197.408	-77.2003	-197.408		0.112958	0.10697	0.109964	0.00598833		-274.603	-77.1988	-197.404	-77.1987	-197.404		0.117896	0.103604	0.11075	0.0142924		45_Ethyne-Pentane_2.00	-274.635	-77.2042	-197.431	-77.2042	-197.431		0.0920263	0.0864492	0.0892378	0.00557712			45_Ethyne-Pentane_2.00	-273.274	-76.8545	-196.419	-76.8545	-196.419		45_Ethyne-Pentane_2.00.out:	-273.271	-76.8537	-196.417	-76.8537
46_Peptide-Pentane_0.90	3.81429	46_Peptide-Pentane_0.90	-445.605	-248.19	-197.408	-248.19	-197.408		4.19454	4.15071	4.17263	0.0438294		-445.596	-248.185	-197.404	-248.185	-197.404		4.23139	4.1047	4.16804	0.126688		46_Peptide-Pentane_0.90	-445.628	-248.194	-197.431	-248.194	-197.431		1.97608	1.93381	1.95494	0.0422761			46_Peptide-Pentane_0.90	-443.532	-247.122	-196.419	-247.122	-196.419		46_Peptide-Pentane_0.90.out:	-443.527	-247.119	-196.417	-247.119
46_Peptide-Pentane_0.95	4.26368	46_Peptide-Pentane_0.95	-445.605	-248.19	-197.408	-248.19	-197.408		4.53516	4.49556	4.51536	0.0395972		-445.597	-248.185	-197.404	-248.185	-197.404		4.5657	4.45344	4.50957	0.112262		46_Peptide-Pentane_0.95	-445.629	-248.194	-197.431	-248.194	-197.431		2.69321	2.6552	2.6742	0.0380106			46_Peptide-Pentane_0.95	-443.535	-247.122	-196.419	-247.122	-196.419		46_Peptide-Pentane_0.95.out:	-443.53	-247.119	-196.417	-247.119
46_Peptide-Pentane_1.00	4.29754	46_Peptide-Pentane_1.00	-445.605	-248.19	-197.408	-248.19	-197.408		4.49367	4.45796	4.47581	0.0357047		-445.596	-248.185	-197.404	-248.185	-197.404		4.51908	4.41969	4.46939	0.0993913		46_Peptide-Pentane_1.00	-445.63	-248.194	-197.431	-248.194	-197.431		2.96007	2.92595	2.94301	0.0341223			46_Peptide-Pentane_1.00	-443.537	-247.122	-196.419	-247.122	-196.419		46_Peptide-Pentane_1.00.out:	-443.532	-247.119	-196.417	-247.119
46_Peptide-Pentane_1.05	4.09624	46_Peptide-Pentane_1.05	-445.605	-248.19	-197.408	-248.19	-197.408		4.24015	4.20807	4.22411	0.0320734		-445.596	-248.185	-197.404	-248.185	-197.404		4.26143	4.17354	4.21749	0.0878863		46_Peptide-Pentane_1.05	-445.63	-248.194	-197.431	-248.194	-197.431		2.96011	2.92958	2.94485	0.0305294			46_Peptide-Pentane_1.05	-443.539	-247.122	-196.419	-247.122	-196.419		46_Peptide-Pentane_1.05.out:	-443.534	-247.119	-196.417	-247.119
46_Peptide-Pentane_1.10	3.77452	46_Peptide-Pentane_1.10	-445.604	-248.19	-197.408	-248.19	-197.408		3.88237	3.85361	3.86799	0.0287663		-445.595	-248.185	-197.404	-248.185	-197.404		3.9002	3.82264	3.86142	0.0775584		46_Peptide-Pentane_1.10	-445.63	-248.194	-197.431	-248.194	-197.431		2.81071	2.78343	2.79707	0.0272866			46_Peptide-Pentane_1.10	-443.54	-247.122	-196.419	-247.122	-196.419		46_Peptide-Pentane_1.10.out:	-443.535	-247.119	-196.417	-247.119
46_Peptide-Pentane_1.25	2.66244	46_Peptide-Pentane_1.25	-445.602	-248.19	-197.408	-248.19	-197.408		2.7153	2.69493	2.70511	0.020378		-445.594	-248.185	-197.404	-248.185	-197.404		2.72512	2.67285	2.69899	0.0522628		46_Peptide-Pentane_1.25	-445.628	-248.194	-197.431	-248.194	-197.431		2.07459	2.05541	2.065	0.0191802			46_Peptide-Pentane_1.25	-443.541	-247.122	-196.419	-247.122	-196.419		46_Peptide-Pentane_1.25.out:	-443.536	-247.119	-196.417	-247.119
46_Peptide-Pentane_1.50	1.21242	46_Peptide-Pentane_1.50	-445.6	-248.19	-197.408	-248.19	-197.408		1.23496	1.22445	1.22971	0.0105097		-445.591	-248.185	-197.404	-248.185	-197.404		1.23907	1.21331	1.22619	0.0257582		46_Peptide-Pentane_1.50	-445.627	-248.194	-197.431	-248.194	-197.431		0.972894	0.963024	0.967959	0.00987			46_Peptide-Pentane_1.50	-443.541	-247.122	-196.419	-247.122	-196.419		46_Peptide-Pentane_1.50.out:	-443.536	-247.119	-196.417	-247.119
46_Peptide-Pentane_2.00	0.297776	46_Peptide-Pentane_2.00	-445.598	-248.19	-197.408	-248.19	-197.408		0.304235	0.300491	0.302363	0.00374438		-445.59	-248.185	-197.404	-248.185	-197.404		0.306619	0.29804	0.30233	0.00857864		46_Peptide-Pentane_2.00	-445.625	-248.194	-197.431	-248.194	-197.431		0.243396	0.239865	0.24163	0.0035311			46_Peptide-Pentane_2.00	-443.541	-247.122	-196.419	-247.122	-196.419		46_Peptide-Pentane_2.00.out:	-443.536	-247.119	-196.417	-247.119
47_Benzene-Benzene_TS_0.90	1.65707	47_Benzene-Benzene_TS_0.90	-463.712	-231.853	-231.853	-231.853	-231.853		3.20193	3.15996	3.18094	0.0419637		-463.704	-231.85	-231.85	-231.85	-231.85		3.2817	3.12228	3.20199	0.159417		47_Benzene-Benzene_TS_0.90	-463.701	-231.849	-231.849	-231.849	-231.849		1.27267	1.23198	1.25232	0.0406959			47_Benzene-Benzene_TS_0.90	-461.586	-230.797	-230.797	-230.797	-230.797		47_Benzene-Benzene_TS_0.90.out:	-461.581	-230.795	-230.795	-230.795
47_Benzene-Benzene_TS_0.95	2.6025	47_Benzene-Benzene_TS_0.95	-463.713	-231.853	-231.853	-231.853	-231.853		3.78845	3.75092	3.76969	0.0375257		-463.705	-231.85	-231.85	-231.85	-231.85		3.85761	3.71684	3.78722	0.140775		47_Benzene-Benzene_TS_0.95	-463.702	-231.849	-231.849	-231.849	-231.849		2.25205	2.21582	2.23394	0.0362306			47_Benzene-Benzene_TS_0.95	-461.59	-230.797	-230.797	-230.797	-230.797		47_Benzene-Benzene_TS_0.95.out:	-461.585	-230.795	-230.795	-230.795
47_Benzene-Benzene_TS_1.00	2.89781	47_Benzene-Benzene_TS_1.00	-463.713	-231.853	-231.853	-231.853	-231.853		3.81893	3.78548	3.80221	0.0334536		-463.705	-231.85	-231.85	-231.85	-231.85		3.87897	3.75427	3.81662	0.124695		47_Benzene-Benzene_TS_1.00	-463.703	-231.849	-231.849	-231.849	-231.849		2.58801	2.55583	2.57192	0.0321805			47_Benzene-Benzene_TS_1.00	-461.592	-230.797	-230.797	-230.797	-230.797		47_Benzene-Benzene_TS_1.00.out:	-461.588	-230.795	-230.795	-230.795
47_Benzene-Benzene_TS_1.05	2.8525	47_Benzene-Benzene_TS_1.05	-463.713	-231.853	-231.853	-231.853	-231.853		3.57672	3.54676	3.56174	0.0299633		-463.705	-231.85	-231.85	-231.85	-231.85		3.62888	3.51835	3.57362	0.110527		47_Benzene-Benzene_TS_1.05	-463.703	-231.849	-231.849	-231.849	-231.849		2.58522	2.55648	2.57085	0.028746			47_Benzene-Benzene_TS_1.05	-461.593	-230.797	-230.797	-230.797	-230.797		47_Benzene-Benzene_TS_1.05.out:	-461.589	-230.795	-230.795	-230.795
47_Benzene-Benzene_TS_1.10	2.64267	47_Benzene-Benzene_TS_1.10	-463.712	-231.853	-231.853	-231.853	-231.853		3.21939	3.19251	3.20595	0.0268869		-463.704	-231.85	-231.85	-231.85	-231.85		3.26416	3.16666	3.21541	0.097504		47_Benzene-Benzene_TS_1.10	-463.703	-231.849	-231.849	-231.849	-231.849		2.41615	2.39042	2.40329	0.0257345			47_Benzene-Benzene_TS_1.10	-461.594	-230.797	-230.797	-230.797	-230.797		47_Benzene-Benzene_TS_1.10.out:	-461.59	-230.795	-230.795	-230.795
47_Benzene-Benzene_TS_1.25	1.80356	47_Benzene-Benzene_TS_1.25	-463.71	-231.853	-231.853	-231.853	-231.853		2.11698	2.0963	2.10664	0.0206802		-463.702	-231.85	-231.85	-231.85	-231.85		2.14198	2.07826	2.11012	0.0637283		47_Benzene-Benzene_TS_1.25	-463.701	-231.849	-231.849	-231.849	-231.849		1.6752	1.6555	1.66535	0.019703			47_Benzene-Benzene_TS_1.25	-461.595	-230.797	-230.797	-230.797	-230.797		47_Benzene-Benzene_TS_1.25.out:	-461.591	-230.795	-230.795	-230.795
47_Benzene-Benzene_TS_1.50	0.855794	47_Benzene-Benzene_TS_1.50	-463.708	-231.853	-231.853	-231.853	-231.853		0.986981	0.975629	0.981305	0.0113524		-463.701	-231.85	-231.85	-231.85	-231.85		0.998867	0.966576	0.982722	0.0322907		47_Benzene-Benzene_TS_1.50	-463.7	-231.849	-231.849	-231.849	-231.849		0.804733	0.794083	0.799408	0.0106497			47_Benzene-Benzene_TS_1.50	-461.595	-230.797	-230.797	-230.797	-230.797		47_Benzene-Benzene_TS_1.50.out:	-461.591	-230.795	-230.795	-230.795
47_Benzene-Benzene_TS_2.00	0.237012	47_Benzene-Benzene_TS_2.00	-463.707	-231.853	-231.853	-231.853	-231.853		0.268665	0.265089	0.266877	0.00357587		-463.699	-231.85	-231.85	-231.85	-231.85		0.276881	0.262658	0.26977	0.0142237		47_Benzene-Benzene_TS_2.00	-463.699	-231.849	-231.849	-231.849	-231.849		0.224543	0.221182	0.222862	0.00336139			47_Benzene-Benzene_TS_2.00	-461.595	-230.797	-230.797	-230.797	-230.797		47_Benzene-Benzene_TS_2.00.out:	-461.59	-230.795	-230.795	-230.795
48_Pyridine-Pyridine_TS_0.90	2.54666	48_Pyridine-Pyridine_TS_0.90	-495.791	-247.893	-247.892	-247.892	-247.892		3.9572	3.92099	3.93909	0.0362034		-495.783	-247.888	-247.888	-247.888	-247.888		4.02129	3.8815	3.9514	0.139789		48_Pyridine-Pyridine_TS_0.90	-495.772	-247.885	-247.884	-247.884	-247.884		2.08472	2.04877	2.06674	0.0359575			48_Pyridine-Pyridine_TS_0.90	-493.585	-246.796	-246.796	-246.796	-246.796		48_Pyridine-Pyridine_TS_0.90.out:	-493.58	-246.794	-246.793	-246.794
48_Pyridine-Pyridine_TS_0.95	3.33554	48_Pyridine-Pyridine_TS_0.95	-495.792	-247.893	-247.892	-247.892	-247.892		4.43999	4.40747	4.42373	0.0325238		-495.784	-247.888	-247.888	-247.888	-247.888		4.49504	4.37032	4.43268	0.124721		48_Pyridine-Pyridine_TS_0.95	-495.774	-247.885	-247.884	-247.884	-247.884		2.92194	2.88973	2.90583	0.0322021			48_Pyridine-Pyridine_TS_0.95	-493.588	-246.796	-246.796	-246.796	-246.796		48_Pyridine-Pyridine_TS_0.95.out:	-493.583	-246.794	-246.793	-246.794
48_Pyridine-Pyridine_TS_1.00	3.56603	48_Pyridine-Pyridine_TS_1.00	-495.792	-247.893	-247.892	-247.892	-247.892		4.44064	4.4114	4.42602	0.0292381		-495.784	-247.888	-247.888	-247.888	-247.888		4.48795	4.37642	4.43218	0.11153		48_Pyridine-Pyridine_TS_1.00	-495.774	-247.884	-247.884	-247.884	-247.884		3.20403	3.17516	3.18959	0.0288663			48_Pyridine-Pyridine_TS_1.00	-493.59	-246.796	-246.796	-246.796	-246.796		48_Pyridine-Pyridine_TS_1.00.out:	-493.585	-246.794	-246.793	-246.794
48_Pyridine-Pyridine_TS_1.05	3.48901	48_Pyridine-Pyridine_TS_1.05	-495.792	-247.893	-247.892	-247.892	-247.892		4.18972	4.16348	4.1766	0.0262431		-495.783	-247.888	-247.888	-247.888	-247.888		4.23025	4.13078	4.18051	0.0994703		48_Pyridine-Pyridine_TS_1.05	-495.774	-247.884	-247.884	-247.884	-247.884		3.17801	3.15216	3.16509	0.0258525			48_Pyridine-Pyridine_TS_1.05	-493.592	-246.796	-246.796	-246.796	-246.796		48_Pyridine-Pyridine_TS_1.05.out:	-493.587	-246.794	-246.793	-246.794
48_Pyridine-Pyridine_TS_1.10	3.25501	48_Pyridine-Pyridine_TS_1.10	-495.791	-247.893	-247.892	-247.892	-247.892		3.82358	3.79991	3.81175	0.0236677		-495.783	-247.888	-247.888	-247.888	-247.888		3.85798	3.76981	3.8139	0.088173		48_Pyridine-Pyridine_TS_1.10	-495.774	-247.884	-247.884	-247.884	-247.884		2.99193	2.96866	2.9803	0.0232655			48_Pyridine-Pyridine_TS_1.10	-493.592	-246.796	-246.796	-246.796	-246.796		48_Pyridine-Pyridine_TS_1.10.out:	-493.587	-246.794	-246.793	-246.794
48_Pyridine-Pyridine_TS_1.25	2.32764	48_Pyridine-Pyridine_TS_1.25	-495.789	-247.893	-247.892	-247.892	-247.892		2.65185	2.63436	2.64311	0.0174897		-495.781	-247.888	-247.888	-247.888	-247.888		2.67165	2.61238	2.64202	0.0592674		48_Pyridine-Pyridine_TS_1.25	-495.772	-247.884	-247.884	-247.884	-247.884		2.17664	2.15957	2.1681	0.0170718			48_Pyridine-Pyridine_TS_1.25	-493.593	-246.796	-246.796	-246.796	-246.796		48_Pyridine-Pyridine_TS_1.25.out:	-493.588	-246.794	-246.793	-246.794
48_Pyridine-Pyridine_TS_1.50	1.20594	48_Pyridine-Pyridine_TS_1.50	-495.787	-247.893	-247.892	-247.892	-247.892		1.35312	1.3436	1.34836	0.00952347		-495.779	-247.888	-247.888	-247.888	-247.888		1.36294	1.33173	1.34733	0.0312092		48_Pyridine-Pyridine_TS_1.50	-495.771	-247.884	-247.884	-247.884	-247.884		1.14747	1.1383	1.14288	0.00917368			48_Pyridine-Pyridine_TS_1.50	-493.593	-246.796	-246.796	-246.796	-246.796		48_Pyridine-Pyridine_TS_1.50.out:	-493.588	-246.794	-246.793	-246.794
48_Pyridine-Pyridine_TS_2.00	0.384102	48_Pyridine-Pyridine_TS_2.00	-495.786	-247.892	-247.892	-247.892	-247.892		0.427289	0.424355	0.425822	0.00293411		-495.777	-247.888	-247.888	-247.888	-247.888		0.433759	0.420774	0.427266	0.0129858		48_Pyridine-Pyridine_TS_2.00	-495.77	-247.884	-247.884	-247.884	-247.884		0.374449	0.371641	0.373045	0.00280835			48_Pyridine-Pyridine_TS_2.00	-493.592	-246.796	-246.796	-246.796	-246.796		48_Pyridine-Pyridine_TS_2.00.out:	-493.587	-246.794	-246.793	-246.794
49_Benzene-Pyridine_TS_0.90	2.09912	49_Benzene-Pyridine_TS_0.90	-479.752	-231.853	-247.893	-231.853	-247.892		3.58342	3.54377	3.56359	0.0396512		-479.744	-231.85	-247.888	-231.85	-247.888		3.66409	3.50782	3.58595	0.156275		49_Benzene-Pyridine_TS_0.90	-479.736	-231.849	-247.884	-231.849	-247.884		1.66387	1.62522	1.64455	0.038642			49_Benzene-Pyridine_TS_0.90	-477.585	-230.797	-246.796	-230.797	-246.796		49_Benzene-Pyridine_TS_0.90.out:	-477.58	-230.795	-246.794	-230.795
49_Benzene-Pyridine_TS_0.95	3.0636	49_Benzene-Pyridine_TS_0.95	-479.753	-231.853	-247.893	-231.853	-247.892		4.20332	4.16794	4.18563	0.0353829		-479.745	-231.85	-247.888	-231.85	-247.888		4.27354	4.13556	4.20455	0.137976		49_Benzene-Pyridine_TS_0.95	-479.738	-231.849	-247.884	-231.849	-247.884		2.67487	2.64053	2.6577	0.0343346			49_Benzene-Pyridine_TS_0.95	-477.589	-230.797	-246.796	-230.797	-246.796		49_Benzene-Pyridine_TS_0.95.out:	-477.584	-230.795	-246.794	-230.795
49_Benzene-Pyridine_TS_1.00	3.35433	49_Benzene-Pyridine_TS_1.00	-479.753	-231.853	-247.893	-231.853	-247.892		4.23988	4.20828	4.22408	0.0316008		-479.745	-231.85	-247.888	-231.85	-247.888		4.30114	4.17884	4.23999	0.122294		49_Benzene-Pyridine_TS_1.00	-479.739	-231.849	-247.884	-231.849	-247.884		3.01594	2.98538	3.00066	0.0305559			49_Benzene-Pyridine_TS_1.00	-477.591	-230.797	-246.796	-230.797	-246.796		49_Benzene-Pyridine_TS_1.00.out:	-477.587	-230.795	-246.794	-230.795
49_Benzene-Pyridine_TS_1.05	3.29112	49_Benzene-Pyridine_TS_1.05	-479.752	-231.853	-247.893	-231.853	-247.892		3.9877	3.9594	3.97355	0.0283084		-479.744	-231.85	-247.888	-231.85	-247.888		4.04113	3.93248	3.98681	0.108648		49_Benzene-Pyridine_TS_1.05	-479.739	-231.849	-247.884	-231.849	-247.884		3.00254	2.97523	2.98888	0.0273045			49_Benzene-Pyridine_TS_1.05	-477.593	-230.797	-246.796	-230.797	-246.796		49_Benzene-Pyridine_TS_1.05.out:	-477.588	-230.795	-246.794	-230.795
49_Benzene-Pyridine_TS_1.10	3.05632	49_Benzene-Pyridine_TS_1.10	-479.752	-231.853	-247.893	-231.853	-247.892		3.61153	3.58619	3.59886	0.025338		-479.744	-231.85	-247.888	-231.85	-247.888		3.65785	3.56166	3.60975	0.096188		49_Benzene-Pyridine_TS_1.10	-479.738	-231.849	-247.884	-231.849	-247.884		2.81411	2.78972	2.80191	0.0243891			49_Benzene-Pyridine_TS_1.10	-477.594	-230.797	-246.796	-230.797	-246.796		49_Benzene-Pyridine_TS_1.10.out:	-477.589	-230.795	-246.794	-230.795
49_Benzene-Pyridine_TS_1.25	2.13397	49_Benzene-Pyridine_TS_1.25	-479.75	-231.853	-247.892	-231.853	-247.892		2.43668	2.41818	2.42743	0.0185001		-479.742	-231.85	-247.888	-231.85	-247.888		2.46351	2.40023	2.43187	0.0632771		49_Benzene-Pyridine_TS_1.25	-479.737	-231.849	-247.884	-231.849	-247.884		1.99946	1.98175	1.9906	0.0177056			49_Benzene-Pyridine_TS_1.25	-477.594	-230.797	-246.796	-230.797	-246.796		49_Benzene-Pyridine_TS_1.25.out:	-477.59	-230.795	-246.794	-230.795
49_Benzene-Pyridine_TS_1.50	1.07499	49_Benzene-Pyridine_TS_1.50	-479.748	-231.853	-247.892	-231.853	-247.892		1.20535	1.19524	1.2003	0.0101155		-479.74	-231.85	-247.888	-231.85	-247.888		1.21798	1.18624	1.20211	0.0317464		49_Benzene-Pyridine_TS_1.50	-479.735	-231.849	-247.884	-231.849	-247.884		1.02581	1.01629	1.02105	0.00952518			49_Benzene-Pyridine_TS_1.50	-477.594	-230.797	-246.796	-230.797	-246.796		49_Benzene-Pyridine_TS_1.50.out:	-477.589	-230.795	-246.794	-230.795
49_Benzene-Pyridine_TS_2.00	0.344899	49_Benzene-Pyridine_TS_2.00	-479.747	-231.853	-247.892	-231.853	-247.892		0.379907	0.376439	0.378173	0.00346833		-479.738	-231.85	-247.888	-231.85	-247.888		0.388232	0.37402	0.381126	0.0142124		49_Benzene-Pyridine_TS_2.00	-479.734	-231.849	-247.884	-231.849	-247.884		0.336494	0.333221	0.334857	0.00327222			49_Benzene-Pyridine_TS_2.00	-477.594	-230.797	-246.796	-230.797	-246.796		49_Benzene-Pyridine_TS_2.00.out:	-477.589	-230.795	-246.794	-230.795
50_Benzene-Ethyne_CH-pi_0.90	1.84672	50_Benzene-Ethyne_CH-pi_0.90	-309.058	-231.853	-77.2003	-231.853	-77.2003		2.93725	2.90401	2.92063	0.0332349		-309.053	-231.85	-77.1988	-231.85	-77.1987		2.99487	2.8612	2.92804	0.133672		50_Benzene-Ethyne_CH-pi_0.90	-309.056	-231.849	-77.2042	-231.849	-77.2042		1.59983	1.56676	1.58329	0.0330656			50_Benzene-Ethyne_CH-pi_0.90	-307.647	-230.797	-76.8544	-230.797	-76.8544		50_Benzene-Ethyne_CH-pi_0.90.out:	-307.644	-230.795	-76.8536	-230.795
50_Benzene-Ethyne_CH-pi_0.95	2.63638	50_Benzene-Ethyne_CH-pi_0.95	-309.059	-231.853	-77.2003	-231.853	-77.2003		3.46575	3.43616	3.45095	0.0295909		-309.054	-231.85	-77.1988	-231.85	-77.1987		3.51682	3.39867	3.45774	0.118145		50_Benzene-Ethyne_CH-pi_0.95	-309.057	-231.849	-77.2042	-231.849	-77.2042		2.41246	2.38311	2.39778	0.0293486			50_Benzene-Ethyne_CH-pi_0.95	-307.65	-230.797	-76.8544	-230.797	-76.8544		50_Benzene-Ethyne_CH-pi_0.95.out:	-307.647	-230.795	-76.8536	-230.795
50_Benzene-Ethyne_CH-pi_1.00	2.86486	50_Benzene-Ethyne_CH-pi_1.00	-309.059	-231.853	-77.2003	-231.853	-77.2003		3.50163	3.47529	3.48846	0.0263411		-309.054	-231.85	-77.1988	-231.85	-77.1987		3.54668	3.44182	3.49425	0.104857		50_Benzene-Ethyne_CH-pi_1.00	-309.058	-231.849	-77.2042	-231.849	-77.2042		2.66757	2.64153	2.65455	0.026042			50_Benzene-Ethyne_CH-pi_1.00	-307.652	-230.797	-76.8544	-230.797	-76.8544		50_Benzene-Ethyne_CH-pi_1.00.out:	-307.649	-230.795	-76.8536	-230.795
50_Benzene-Ethyne_CH-pi_1.05	2.79952	50_Benzene-Ethyne_CH-pi_1.05	-309.059	-231.853	-77.2003	-231.853	-77.2003		3.29398	3.27045	3.28221	0.0235289		-309.054	-231.85	-77.1988	-231.85	-77.1987		3.33363	3.24008	3.28686	0.0935495		50_Benzene-Ethyne_CH-pi_1.05	-309.058	-231.849	-77.2042	-231.849	-77.2042		2.63008	2.60688	2.61848	0.0231969			50_Benzene-Ethyne_CH-pi_1.05	-307.653	-230.797	-76.8544	-230.797	-76.8544		50_Benzene-Ethyne_CH-pi_1.05.out:	-307.65	-230.795	-76.8536	-230.795
50_Benzene-Ethyne_CH-pi_1.10	2.59289	50_Benzene-Ethyne_CH-pi_1.10	-309.058	-231.853	-77.2003	-231.853	-77.2003		2.9822	2.96113	2.97166	0.0210669		-309.053	-231.85	-77.1988	-231.85	-77.1987		3.01658	2.93335	2.97497	0.0832285		50_Benzene-Ethyne_CH-pi_1.10	-309.057	-231.849	-77.2042	-231.849	-77.2042		2.45065	2.42994	2.44029	0.0207173			50_Benzene-Ethyne_CH-pi_1.10	-307.653	-230.797	-76.8544	-230.797	-76.8544		50_Benzene-Ethyne_CH-pi_1.10.out:	-307.65	-230.795	-76.8536	-230.795
50_Benzene-Ethyne_CH-pi_1.25	1.80226	50_Benzene-Ethyne_CH-pi_1.25	-309.057	-231.853	-77.2003	-231.853	-77.2003		2.00852	1.99299	2.00076	0.0155322		-309.051	-231.85	-77.1988	-231.85	-77.1987		2.02625	1.97221	1.99923	0.0540434		50_Benzene-Ethyne_CH-pi_1.25	-309.056	-231.849	-77.2042	-231.849	-77.2042		1.72571	1.71059	1.71815	0.0151174			50_Benzene-Ethyne_CH-pi_1.25	-307.653	-230.797	-76.8544	-230.797	-76.8544		50_Benzene-Ethyne_CH-pi_1.25.out:	-307.65	-230.795	-76.8536	-230.795
50_Benzene-Ethyne_CH-pi_1.50	0.902823	50_Benzene-Ethyne_CH-pi_1.50	-309.055	-231.853	-77.2003	-231.853	-77.2003		0.987773	0.979409	0.983591	0.00836464		-309.05	-231.85	-77.1987	-231.85	-77.1987		0.995223	0.969348	0.982285	0.0258749		50_Benzene-Ethyne_CH-pi_1.50	-309.055	-231.849	-77.2042	-231.849	-77.2042		0.875978	0.868085	0.872031	0.00789357			50_Benzene-Ethyne_CH-pi_1.50	-307.653	-230.797	-76.8544	-230.797	-76.8544		50_Benzene-Ethyne_CH-pi_1.50.out:	-307.65	-230.795	-76.8536	-230.795
50_Benzene-Ethyne_CH-pi_2.00	0.277246	50_Benzene-Ethyne_CH-pi_2.00	-309.054	-231.853	-77.2003	-231.853	-77.2003		0.297875	0.295458	0.296667	0.0024171		-309.049	-231.85	-77.1987	-231.85	-77.1987		0.303757	0.292808	0.298282	0.0109488		50_Benzene-Ethyne_CH-pi_2.00	-309.054	-231.849	-77.2042	-231.849	-77.2042		0.27205	0.269778	0.270914	0.00227214			50_Benzene-Ethyne_CH-pi_2.00	-307.652	-230.797	-76.8544	-230.797	-76.8544		50_Benzene-Ethyne_CH-pi_2.00.out:	-307.649	-230.795	-76.8536	-230.795
51_Ethyne-Ethyne_TS_0.90	1.20308	51_Ethyne-Ethyne_TS_0.90	-154.403	-77.2003	-77.2003	-77.2003	-77.2003		1.46163	1.43492	1.44827	0.0267131		-154.4	-77.1989	-77.1988	-77.1987	-77.1987		1.51753	1.40792	1.46272	0.109611		51_Ethyne-Ethyne_TS_0.90	-154.41	-77.2042	-77.2042	-77.2042	-77.2042		0.982208	0.95589	0.969049	0.0263171			51_Ethyne-Ethyne_TS_0.90	-153.708	-76.8545	-76.8545	-76.8545	-76.8545		51_Ethyne-Ethyne_TS_0.90.out:	-153.707	-76.8537	-76.8537	-76.8537
51_Ethyne-Ethyne_TS_0.95	1.46352	51_Ethyne-Ethyne_TS_0.95	-154.403	-77.2003	-77.2003	-77.2003	-77.2003		1.66414	1.63945	1.65179	0.0246914		-154.4	-77.1989	-77.1988	-77.1987	-77.1987		1.71677	1.61563	1.6662	0.101138		51_Ethyne-Ethyne_TS_0.95	-154.41	-77.2042	-77.2042	-77.2042	-77.2042		1.28148	1.25727	1.26938	0.0242112			51_Ethyne-Ethyne_TS_0.95	-153.709	-76.8545	-76.8545	-76.8545	-76.8545		51_Ethyne-Ethyne_TS_0.95.out:	-153.708	-76.8537	-76.8537	-76.8537
51_Ethyne-Ethyne_TS_1.00	1.51585	51_Ethyne-Ethyne_TS_1.00	-154.403	-77.2003	-77.2003	-77.2003	-77.2003		1.67303	1.65019	1.66161	0.022845		-154.4	-77.1989	-77.1988	-77.1987	-77.1987		1.72231	1.62878	1.67555	0.0935238		51_Ethyne-Ethyne_TS_1.00	-154.411	-77.2042	-77.2042	-77.2042	-77.2042		1.36644	1.34414	1.35529	0.0222941			51_Ethyne-Ethyne_TS_1.00	-153.71	-76.8545	-76.8545	-76.8545	-76.8545		51_Ethyne-Ethyne_TS_1.00.out:	-153.708	-76.8537	-76.8537	-76.8537
51_Ethyne-Ethyne_TS_1.05	1.4559	51_Ethyne-Ethyne_TS_1.05	-154.403	-77.2003	-77.2003	-77.2003	-77.2003		1.5797	1.55859	1.56915	0.0211088		-154.4	-77.1989	-77.1988	-77.1987	-77.1987		1.62549	1.53902	1.58225	0.0864726		51_Ethyne-Ethyne_TS_1.05	-154.411	-77.2042	-77.2042	-77.2042	-77.2042		1.33313	1.31263	1.32288	0.0204962			51_Ethyne-Ethyne_TS_1.05	-153.71	-76.8545	-76.8545	-76.8545	-76.8545		51_Ethyne-Ethyne_TS_1.05.out:	-153.709	-76.8537	-76.8537	-76.8537
51_Ethyne-Ethyne_TS_1.10	1.34111	51_Ethyne-Ethyne_TS_1.10	-154.403	-77.2003	-77.2003	-77.2003	-77.2003		1.43904	1.41953	1.42928	0.0195084		-154.4	-77.1989	-77.1988	-77.1987	-77.1987		1.48108	1.40136	1.44122	0.0797216		51_Ethyne-Ethyne_TS_1.10	-154.41	-77.2042	-77.2042	-77.2042	-77.2042		1.23983	1.22099	1.23041	0.0188434			51_Ethyne-Ethyne_TS_1.10	-153.71	-76.8545	-76.8545	-76.8545	-76.8545		51_Ethyne-Ethyne_TS_1.10.out:	-153.709	-76.8537	-76.8537	-76.8537
51_Ethyne-Ethyne_TS_1.25	0.933765	51_Ethyne-Ethyne_TS_1.25	-154.402	-77.2003	-77.2003	-77.2003	-77.2003		0.985023	0.969297	0.97716	0.0157257		-154.399	-77.1988	-77.1987	-77.1987	-77.1987		1.01521	0.954442	0.984825	0.060766		51_Ethyne-Ethyne_TS_1.25	-154.41	-77.2042	-77.2042	-77.2042	-77.2042		0.876917	0.861924	0.869421	0.0149931			51_Ethyne-Ethyne_TS_1.25	-153.71	-76.8545	-76.8545	-76.8545	-76.8545		51_Ethyne-Ethyne_TS_1.25.out:	-153.708	-76.8537	-76.8537	-76.8537
51_Ethyne-Ethyne_TS_1.50	0.46263	51_Ethyne-Ethyne_TS_1.50	-154.401	-77.2003	-77.2003	-77.2003	-77.2003		0.486535	0.475856	0.481196	0.0106791		-154.398	-77.1988	-77.1987	-77.1987	-77.1987		0.505434	0.467323	0.486378	0.0381108		51_Ethyne-Ethyne_TS_1.50	-154.409	-77.2042	-77.2042	-77.2042	-77.2042		0.443325	0.433286	0.438305	0.0100394			51_Ethyne-Ethyne_TS_1.50	-153.71	-76.8545	-76.8545	-76.8545	-76.8545		51_Ethyne-Ethyne_TS_1.50.out:	-153.708	-76.8537	-76.8537	-76.8537
51_Ethyne-Ethyne_TS_2.00	0.135484	51_Ethyne-Ethyne_TS_2.00	-154.401	-77.2003	-77.2003	-77.2003	-77.2003		0.142117	0.138206	0.140161	0.00391071		-154.398	-77.1988	-77.1987	-77.1987	-77.1987		0.144456	0.135618	0.140037	0.00883795		51_Ethyne-Ethyne_TS_2.00	-154.409	-77.2042	-77.2042	-77.2042	-77.2042		0.132211	0.128574	0.130392	0.0036368			51_Ethyne-Ethyne_TS_2.00	-153.709	-76.8545	-76.8545	-76.8545	-76.8545		51_Ethyne-Ethyne_TS_2.00.out:	-153.708	-76.8537	-76.8537	-76.8537
52_Benzene-AcOH_OH-pi_0.90	4.00161	52_Benzene-AcOH_OH-pi_0.90	-460.694	-231.853	-228.833	-231.853	-228.833		4.87845	4.82515	4.8518	0.0532952		-460.685	-231.85	-228.828	-231.849	-228.827		4.94266	4.785	4.86383	0.157659		52_Benzene-AcOH_OH-pi_0.90	-460.685	-231.849	-228.83	-231.849	-228.83		3.30229	3.25071	3.2765	0.0515804			52_Benzene-AcOH_OH-pi_0.90	-458.718	-230.797	-227.923	-230.797	-227.923		52_Benzene-AcOH_OH-pi_0.90.out:	-458.713	-230.795	-227.921	-230.795
52_Benzene-AcOH_OH-pi_0.95	4.6131	52_Benzene-AcOH_OH-pi_0.95	-460.694	-231.853	-228.833	-231.853	-228.833		5.29399	5.24522	5.26961	0.048766		-460.685	-231.85	-228.828	-231.849	-228.827		5.35339	5.21126	5.28233	0.142124		52_Benzene-AcOH_OH-pi_0.95	-460.686	-231.849	-228.83	-231.849	-228.83		4.00358	3.95651	3.98004	0.0470693			52_Benzene-AcOH_OH-pi_0.95	-458.72	-230.797	-227.923	-230.797	-227.923		52_Benzene-AcOH_OH-pi_0.95.out:	-458.715	-230.795	-227.921	-230.795
52_Benzene-AcOH_OH-pi_1.00	4.73718	52_Benzene-AcOH_OH-pi_1.00	-460.694	-231.853	-228.833	-231.853	-228.833		5.2703	5.22583	5.24807	0.0444756		-460.685	-231.85	-228.828	-231.849	-228.827		5.32462	5.19667	5.26064	0.127943		52_Benzene-AcOH_OH-pi_1.00	-460.686	-231.849	-228.83	-231.849	-228.83		4.20993	4.16711	4.18852	0.0428255			52_Benzene-AcOH_OH-pi_1.00	-458.722	-230.797	-227.923	-230.797	-227.923		52_Benzene-AcOH_OH-pi_1.00.out:	-458.717	-230.795	-227.921	-230.795
52_Benzene-AcOH_OH-pi_1.05	4.58343	52_Benzene-AcOH_OH-pi_1.05	-460.694	-231.853	-228.833	-231.853	-228.833		5.00462	4.96416	4.98439	0.0404605		-460.685	-231.85	-228.828	-231.849	-228.827		5.05348	4.93854	4.99601	0.114939		52_Benzene-AcOH_OH-pi_1.05	-460.686	-231.849	-228.83	-231.849	-228.83		4.13041	4.09153	4.11097	0.0388819			52_Benzene-AcOH_OH-pi_1.05	-458.723	-230.797	-227.923	-230.797	-227.923		52_Benzene-AcOH_OH-pi_1.05.out:	-458.718	-230.795	-227.921	-230.795
52_Benzene-AcOH_OH-pi_1.10	4.28292	52_Benzene-AcOH_OH-pi_1.10	-460.693	-231.853	-228.833	-231.853	-228.833		4.61934	4.58257	4.60095	0.0367704		-460.684	-231.85	-228.828	-231.849	-228.827		4.66254	4.55947	4.61101	0.103068		52_Benzene-AcOH_OH-pi_1.10	-460.686	-231.849	-228.83	-231.849	-228.83		3.89586	3.86058	3.87822	0.0352764			52_Benzene-AcOH_OH-pi_1.10	-458.723	-230.797	-227.923	-230.797	-227.923		52_Benzene-AcOH_OH-pi_1.10.out:	-458.718	-230.795	-227.921	-230.795
52_Benzene-AcOH_OH-pi_1.25	3.15593	52_Benzene-AcOH_OH-pi_1.25	-460.691	-231.853	-228.833	-231.853	-228.833		3.34027	3.3129	3.32659	0.027373		-460.682	-231.85	-228.828	-231.849	-228.827		3.36682	3.29443	3.33063	0.0723915		52_Benzene-AcOH_OH-pi_1.25	-460.684	-231.849	-228.83	-231.849	-228.83		2.9207	2.89455	2.90763	0.0261523			52_Benzene-AcOH_OH-pi_1.25	-458.723	-230.797	-227.923	-230.797	-227.923		52_Benzene-AcOH_OH-pi_1.25.out:	-458.719	-230.795	-227.921	-230.795
52_Benzene-AcOH_OH-pi_1.50	1.72199	52_Benzene-AcOH_OH-pi_1.50	-460.689	-231.853	-228.833	-231.853	-228.833		1.80428	1.78866	1.79647	0.0156198		-460.68	-231.85	-228.828	-231.849	-228.827		1.81458	1.7774	1.79599	0.0371782		52_Benzene-AcOH_OH-pi_1.50	-460.682	-231.849	-228.83	-231.849	-228.83		1.62106	1.60626	1.61366	0.0148013			52_Benzene-AcOH_OH-pi_1.50	-458.723	-230.797	-227.923	-230.797	-227.923		52_Benzene-AcOH_OH-pi_1.50.out:	-458.718	-230.795	-227.921	-230.795
52_Benzene-AcOH_OH-pi_2.00	0.564062	52_Benzene-AcOH_OH-pi_2.00	-460.687	-231.853	-228.833	-231.853	-228.833		0.587408	0.582827	0.585118	0.00458137		-460.678	-231.849	-228.828	-231.849	-228.827		0.59435	0.580329	0.58734	0.0140206		52_Benzene-AcOH_OH-pi_2.00	-460.681	-231.849	-228.83	-231.849	-228.83		0.540892	0.536583	0.538737	0.00430893			52_Benzene-AcOH_OH-pi_2.00	-458.721	-230.797	-227.923	-230.797	-227.923		52_Benzene-AcOH_OH-pi_2.00.out:	-458.716	-230.795	-227.921	-230.795
53_Benzene-AcNH2_NH-pi_0.90	3.84881	53_Benzene-AcNH2_NH-pi_0.90	-440.816	-231.853	-208.955	-231.853	-208.955		4.41485	4.36152	4.38818	0.0533266		-440.807	-231.85	-208.951	-231.849	-208.951		4.46574	4.32163	4.39369	0.144115		53_Benzene-AcNH2_NH-pi_0.90	-440.81	-231.849	-208.956	-231.849	-208.956		3.06609	3.01544	3.04076	0.0506483			53_Benzene-AcNH2_NH-pi_0.90	-438.874	-230.797	-208.079	-230.797	-208.079		53_Benzene-AcNH2_NH-pi_0.90.out:	-438.87	-230.795	-208.077	-230.795
53_Benzene-AcNH2_NH-pi_0.95	4.32013	53_Benzene-AcNH2_NH-pi_0.95	-440.816	-231.853	-208.955	-231.853	-208.955		4.75827	4.70863	4.73345	0.0496385		-440.808	-231.85	-208.951	-231.849	-208.951		4.8027	4.67186	4.73728	0.130846		53_Benzene-AcNH2_NH-pi_0.95	-440.811	-231.849	-208.956	-231.849	-208.956		3.63913	3.59218	3.61565	0.0469503			53_Benzene-AcNH2_NH-pi_0.95	-438.877	-230.797	-208.079	-230.797	-208.079		53_Benzene-AcNH2_NH-pi_0.95.out:	-438.872	-230.795	-208.077	-230.795
53_Benzene-AcNH2_NH-pi_1.00	4.40828	53_Benzene-AcNH2_NH-pi_1.00	-440.816	-231.853	-208.955	-231.853	-208.955		4.75093	4.70482	4.72787	0.0461104		-440.808	-231.85	-208.951	-231.849	-208.951		4.78975	4.67106	4.73041	0.11869		53_Benzene-AcNH2_NH-pi_1.00	-440.811	-231.849	-208.956	-231.849	-208.956		3.81927	3.77583	3.79755	0.0434389			53_Benzene-AcNH2_NH-pi_1.00	-438.878	-230.797	-208.079	-230.797	-208.079		53_Benzene-AcNH2_NH-pi_1.00.out:	-438.873	-230.795	-208.077	-230.795
53_Benzene-AcNH2_NH-pi_1.05	4.27029	53_Benzene-AcNH2_NH-pi_1.05	-440.816	-231.853	-208.955	-231.853	-208.955		4.54134	4.49862	4.51998	0.042721		-440.808	-231.85	-208.951	-231.849	-208.951		4.57535	4.46779	4.52157	0.107558		53_Benzene-AcNH2_NH-pi_1.05	-440.811	-231.849	-208.956	-231.849	-208.956		3.76345	3.72336	3.74341	0.0400936			53_Benzene-AcNH2_NH-pi_1.05	-438.879	-230.797	-208.079	-230.797	-208.079		53_Benzene-AcNH2_NH-pi_1.05.out:	-438.874	-230.795	-208.077	-230.795
53_Benzene-AcNH2_NH-pi_1.10	4.0079	53_Benzene-AcNH2_NH-pi_1.10	-440.815	-231.853	-208.955	-231.853	-208.955		4.22504	4.1857	4.20537	0.039343		-440.807	-231.85	-208.951	-231.849	-208.951		4.25495	4.15757	4.20626	0.0973822		53_Benzene-AcNH2_NH-pi_1.10	-440.811	-231.849	-208.956	-231.849	-208.956		3.57329	3.5365	3.5549	0.0367925			53_Benzene-AcNH2_NH-pi_1.10	-438.879	-230.797	-208.079	-230.797	-208.079		53_Benzene-AcNH2_NH-pi_1.10.out:	-438.875	-230.795	-208.077	-230.795
53_Benzene-AcNH2_NH-pi_1.25	3.00521	53_Benzene-AcNH2_NH-pi_1.25	-440.814	-231.853	-208.955	-231.853	-208.955		3.12594	3.09593	3.11093	0.0300106		-440.805	-231.85	-208.951	-231.849	-208.951		3.14627	3.07479	3.11053	0.071482		53_Benzene-AcNH2_NH-pi_1.25	-440.81	-231.849	-208.956	-231.849	-208.956		2.73479	2.70696	2.72087	0.0278273			53_Benzene-AcNH2_NH-pi_1.25	-438.879	-230.797	-208.079	-230.797	-208.079		53_Benzene-AcNH2_NH-pi_1.25.out:	-438.875	-230.795	-208.077	-230.795
53_Benzene-AcNH2_NH-pi_1.50	1.6679	53_Benzene-AcNH2_NH-pi_1.50	-440.811	-231.853	-208.955	-231.853	-208.955		1.72259	1.70464	1.71362	0.0179471		-440.803	-231.849	-208.951	-231.849	-208.951		1.73326	1.69195	1.7126	0.0413166		53_Benzene-AcNH2_NH-pi_1.50	-440.808	-231.849	-208.956	-231.849	-208.956		1.54391	1.52741	1.53566	0.016498			53_Benzene-AcNH2_NH-pi_1.50	-438.878	-230.797	-208.079	-230.797	-208.079		53_Benzene-AcNH2_NH-pi_1.50.out:	-438.874	-230.795	-208.077	-230.795
53_Benzene-AcNH2_NH-pi_2.00	0.491778	53_Benzene-AcNH2_NH-pi_2.00	-440.809	-231.853	-208.955	-231.853	-208.955		0.507156	0.501816	0.504486	0.00533979		-440.801	-231.849	-208.951	-231.849	-208.951		0.513233	0.499013	0.506123	0.0142208		53_Benzene-AcNH2_NH-pi_2.00	-440.806	-231.849	-208.956	-231.849	-208.956		0.46339	0.458486	0.460938	0.00490402			53_Benzene-AcNH2_NH-pi_2.00	-438.877	-230.797	-208.079	-230.797	-208.079		53_Benzene-AcNH2_NH-pi_2.00.out:	-438.872	-230.795	-208.077	-230.795
54_Benzene-Water_OH-pi_0.90	2.76563	54_Benzene-Water_OH-pi_0.90	-308.226	-231.853	-76.3675	-231.853	-76.3674		3.29139	3.253	3.2722	0.0383876		-308.22	-231.85	-76.3655	-231.85	-76.3654		3.35394	3.22823	3.29108	0.125706		54_Benzene-Water_OH-pi_0.90	-308.221	-231.849	-76.3684	-231.849	-76.3684		2.31059	2.27301	2.2918	0.0375805			54_Benzene-Water_OH-pi_0.90	-306.863	-230.797	-76.0669	-230.797	-76.0669		54_Benzene-Water_OH-pi_0.90.out:	-306.859	-230.795	-76.0659	-230.795
54_Benzene-Water_OH-pi_0.95	3.18554	54_Benzene-Water_OH-pi_0.95	-308.227	-231.853	-76.3675	-231.853	-76.3674		3.59114	3.55634	3.57374	0.0347985		-308.221	-231.85	-76.3654	-231.85	-76.3654		3.64713	3.53462	3.59088	0.11251		54_Benzene-Water_OH-pi_0.95	-308.222	-231.849	-76.3684	-231.849	-76.3684		2.80215	2.76815	2.78515	0.0340027			54_Benzene-Water_OH-pi_0.95	-306.865	-230.797	-76.0669	-230.797	-76.0669		54_Benzene-Water_OH-pi_0.95.out:	-306.861	-230.795	-76.0659	-230.795
54_Benzene-Water_OH-pi_1.00	3.25011	54_Benzene-Water_OH-pi_1.00	-308.227	-231.853	-76.3675	-231.853	-76.3674		3.56665	3.53515	3.5509	0.031495		-308.221	-231.85	-76.3654	-231.85	-76.3654		3.61544	3.51554	3.56549	0.0999009		54_Benzene-Water_OH-pi_1.00	-308.222	-231.849	-76.3684	-231.849	-76.3684		2.92993	2.89919	2.91456	0.0307343			54_Benzene-Water_OH-pi_1.00	-306.866	-230.797	-76.0669	-230.797	-76.0669		54_Benzene-Water_OH-pi_1.00.out:	-306.862	-230.795	-76.0659	-230.795
54_Benzene-Water_OH-pi_1.05	3.12098	54_Benzene-Water_OH-pi_1.05	-308.226	-231.853	-76.3674	-231.853	-76.3674		3.37118	3.34274	3.35696	0.0284381		-308.22	-231.85	-76.3654	-231.85	-76.3654		3.41255	3.32462	3.36859	0.087927		54_Benzene-Water_OH-pi_1.05	-308.222	-231.849	-76.3684	-231.849	-76.3684		2.85578	2.82806	2.84192	0.0277219			54_Benzene-Water_OH-pi_1.05	-306.866	-230.797	-76.0669	-230.797	-76.0669		54_Benzene-Water_OH-pi_1.05.out:	-306.863	-230.795	-76.0659	-230.795
54_Benzene-Water_OH-pi_1.10	2.89572	54_Benzene-Water_OH-pi_1.10	-308.226	-231.853	-76.3674	-231.853	-76.3674		3.09646	3.07085	3.08365	0.0256108		-308.22	-231.85	-76.3654	-231.85	-76.3654		3.13075	3.05396	3.09235	0.0767858		54_Benzene-Water_OH-pi_1.10	-308.222	-231.849	-76.3684	-231.849	-76.3684		2.67768	2.65275	2.66522	0.0249372			54_Benzene-Water_OH-pi_1.10	-306.867	-230.797	-76.0669	-230.797	-76.0669		54_Benzene-Water_OH-pi_1.10.out:	-306.863	-230.795	-76.0659	-230.795
54_Benzene-Water_OH-pi_1.25	2.10498	54_Benzene-Water_OH-pi_1.25	-308.224	-231.853	-76.3674	-231.853	-76.3674		2.21851	2.20015	2.20933	0.0183626		-308.218	-231.85	-76.3654	-231.85	-76.3654		2.23693	2.18752	2.21223	0.0494059		54_Benzene-Water_OH-pi_1.25	-308.221	-231.849	-76.3684	-231.849	-76.3684		1.98833	1.97058	1.97945	0.0177578			54_Benzene-Water_OH-pi_1.25	-306.867	-230.797	-76.0669	-230.797	-76.0669		54_Benzene-Water_OH-pi_1.25.out:	-306.863	-230.795	-76.0659	-230.795
54_Benzene-Water_OH-pi_1.50	1.16029	54_Benzene-Water_OH-pi_1.50	-308.223	-231.853	-76.3674	-231.853	-76.3674		1.21261	1.20344	1.20803	0.0091626		-308.217	-231.85	-76.3654	-231.85	-76.3654		1.2226	1.19795	1.21027	0.0246548		54_Benzene-Water_OH-pi_1.50	-308.22	-231.849	-76.3684	-231.849	-76.3684		1.11966	1.11098	1.11532	0.0086799			54_Benzene-Water_OH-pi_1.50	-306.866	-230.797	-76.0669	-230.797	-76.0669		54_Benzene-Water_OH-pi_1.50.out:	-306.862	-230.795	-76.0658	-230.795
54_Benzene-Water_OH-pi_2.00	0.419038	54_Benzene-Water_OH-pi_2.00	-308.222	-231.853	-76.3674	-231.853	-76.3674		0.435299	0.432753	0.434026	0.00254566		-308.216	-231.85	-76.3654	-231.85	-76.3654		0.43968	0.431379	0.43553	0.00830027		54_Benzene-Water_OH-pi_2.00	-308.218	-231.849	-76.3684	-231.849	-76.3684		0.41409	0.411664	0.412877	0.00242665			54_Benzene-Water_OH-pi_2.00	-306.865	-230.797	-76.0669	-230.797	-76.0669		54_Benzene-Water_OH-pi_2.00.out:	-306.862	-230.795	-76.0658	-230.795
55_Benzene-MeOH_OH-pi_0.90	3.40283	55_Benzene-MeOH_OH-pi_0.90	-347.447	-231.853	-115.586	-231.853	-115.586		4.39883	4.35798	4.3784	0.0408519		-347.44	-231.85	-115.584	-231.849	-115.584		4.45888	4.3221	4.39049	0.136773		55_Benzene-MeOH_OH-pi_0.90	-347.446	-231.849	-115.593	-231.849	-115.593		2.7476	2.70782	2.72771	0.0397887			55_Benzene-MeOH_OH-pi_0.90	-345.894	-230.797	-115.101	-230.797	-115.101		55_Benzene-MeOH_OH-pi_0.90.out:	-345.89	-230.795	-115.1	-230.795
55_Benzene-MeOH_OH-pi_0.95	4.01384	55_Benzene-MeOH_OH-pi_0.95	-347.447	-231.853	-115.586	-231.853	-115.586		4.79464	4.75761	4.77612	0.037034		-347.441	-231.85	-115.584	-231.849	-115.584		4.84739	4.72553	4.78646	0.121855		55_Benzene-MeOH_OH-pi_0.95	-347.448	-231.849	-115.593	-231.849	-115.593		3.44585	3.40986	3.42786	0.0359903			55_Benzene-MeOH_OH-pi_0.95	-345.897	-230.797	-115.101	-230.797	-115.101		55_Benzene-MeOH_OH-pi_0.95.out:	-345.893	-230.795	-115.1	-230.795
55_Benzene-MeOH_OH-pi_1.00	4.16759	55_Benzene-MeOH_OH-pi_1.00	-347.447	-231.853	-115.586	-231.853	-115.586		4.78413	4.75058	4.76736	0.033545		-347.441	-231.85	-115.584	-231.849	-115.584		4.82996	4.7217	4.77583	0.108261		55_Benzene-MeOH_OH-pi_1.00	-347.448	-231.849	-115.593	-231.849	-115.593		3.67944	3.64689	3.66317	0.0325487			55_Benzene-MeOH_OH-pi_1.00	-345.899	-230.797	-115.101	-230.797	-115.101		55_Benzene-MeOH_OH-pi_1.00.out:	-345.895	-230.795	-115.1	-230.795
55_Benzene-MeOH_OH-pi_1.05	4.05688	55_Benzene-MeOH_OH-pi_1.05	-347.447	-231.853	-115.586	-231.853	-115.586		4.54741	4.51713	4.53227	0.0302826		-347.44	-231.85	-115.584	-231.849	-115.584		4.58694	4.49091	4.53893	0.0960349		55_Benzene-MeOH_OH-pi_1.05	-347.448	-231.849	-115.593	-231.849	-115.593		3.64044	3.61109	3.62576	0.0293498			55_Benzene-MeOH_OH-pi_1.05	-345.9	-230.797	-115.101	-230.797	-115.101		55_Benzene-MeOH_OH-pi_1.05.out:	-345.896	-230.795	-115.1	-230.795
55_Benzene-MeOH_OH-pi_1.10	3.80401	55_Benzene-MeOH_OH-pi_1.10	-347.446	-231.853	-115.586	-231.853	-115.586		4.198	4.17069	4.18434	0.0273064		-347.44	-231.85	-115.584	-231.849	-115.584		4.23187	4.1467	4.18929	0.085172		55_Benzene-MeOH_OH-pi_1.10	-347.448	-231.849	-115.593	-231.849	-115.593		3.45102	3.42457	3.4378	0.0264415			55_Benzene-MeOH_OH-pi_1.10	-345.9	-230.797	-115.101	-230.797	-115.101		55_Benzene-MeOH_OH-pi_1.10.out:	-345.897	-230.795	-115.1	-230.795
55_Benzene-MeOH_OH-pi_1.25	2.81332	55_Benzene-MeOH_OH-pi_1.25	-347.445	-231.853	-115.586	-231.853	-115.586		3.03126	3.01134	3.0213	0.0199226		-347.438	-231.85	-115.584	-231.849	-115.584		3.05118	2.99297	3.02208	0.0582096		55_Benzene-MeOH_OH-pi_1.25	-347.446	-231.849	-115.593	-231.849	-115.593		2.60543	2.58621	2.59582	0.0192156			55_Benzene-MeOH_OH-pi_1.25	-345.901	-230.797	-115.101	-230.797	-115.101		55_Benzene-MeOH_OH-pi_1.25.out:	-345.897	-230.795	-115.1	-230.795
55_Benzene-MeOH_OH-pi_1.50	1.54163	55_Benzene-MeOH_OH-pi_1.50	-347.442	-231.853	-115.586	-231.853	-115.586		1.63907	1.62783	1.63345	0.0112388		-347.436	-231.85	-115.584	-231.849	-115.584		1.64785	1.61814	1.63299	0.02971		55_Benzene-MeOH_OH-pi_1.50	-347.444	-231.849	-115.593	-231.849	-115.593		1.45882	1.44816	1.45349	0.0106612			55_Benzene-MeOH_OH-pi_1.50	-345.9	-230.797	-115.101	-230.797	-115.101		55_Benzene-MeOH_OH-pi_1.50.out:	-345.897	-230.795	-115.1	-230.795
55_Benzene-MeOH_OH-pi_2.00	0.525743	55_Benzene-MeOH_OH-pi_2.00	-347.441	-231.853	-115.586	-231.853	-115.586		0.551519	0.548295	0.549907	0.00322421		-347.434	-231.85	-115.584	-231.849	-115.584		0.557513	0.545783	0.551648	0.0117299		55_Benzene-MeOH_OH-pi_2.00	-347.443	-231.849	-115.593	-231.849	-115.593		0.508196	0.50518	0.506688	0.00301667			55_Benzene-MeOH_OH-pi_2.00	-345.899	-230.797	-115.101	-230.797	-115.101		55_Benzene-MeOH_OH-pi_2.00.out:	-345.896	-230.795	-115.1	-230.795
56_Benzene-MeNH2_NH-pi_0.90	2.45699	56_Benzene-MeNH2_NH-pi_0.90	-327.574	-231.853	-95.715	-231.853	-95.715		3.51565	3.47795	3.4968	0.0377033		-327.568	-231.85	-95.7131	-231.85	-95.713		3.57281	3.44135	3.50708	0.13146		56_Benzene-MeNH2_NH-pi_0.90	-327.577	-231.849	-95.7245	-231.849	-95.7245		1.87225	1.83566	1.85396	0.0365967			56_Benzene-MeNH2_NH-pi_0.90	-326.054	-230.797	-95.2628	-230.797	-95.2628		56_Benzene-MeNH2_NH-pi_0.90.out:	-326.05	-230.795	-95.2617	-230.795
56_Benzene-MeNH2_NH-pi_0.95	3.05074	56_Benzene-MeNH2_NH-pi_0.95	-327.575	-231.853	-95.715	-231.853	-95.715		3.87964	3.8455	3.86257	0.0341446		-327.569	-231.85	-95.7131	-231.85	-95.713		3.92925	3.81226	3.87076	0.116991		56_Benzene-MeNH2_NH-pi_0.95	-327.578	-231.849	-95.7245	-231.849	-95.7245		2.5436	2.51057	2.52708	0.0330316			56_Benzene-MeNH2_NH-pi_0.95	-326.057	-230.797	-95.2628	-230.797	-95.2628		56_Benzene-MeNH2_NH-pi_0.95.out:	-326.053	-230.795	-95.2617	-230.795
56_Benzene-MeNH2_NH-pi_1.00	3.20933	56_Benzene-MeNH2_NH-pi_1.00	-327.575	-231.853	-95.715	-231.853	-95.715		3.86297	3.83215	3.84756	0.0308151		-327.569	-231.85	-95.7131	-231.85	-95.713		3.90619	3.80194	3.85406	0.104254		56_Benzene-MeNH2_NH-pi_1.00	-327.578	-231.849	-95.7245	-231.849	-95.7245		2.77405	2.74432	2.75919	0.0297324			56_Benzene-MeNH2_NH-pi_1.00	-326.059	-230.797	-95.2628	-230.797	-95.2628		56_Benzene-MeNH2_NH-pi_1.00.out:	-326.055	-230.795	-95.2617	-230.795
56_Benzene-MeNH2_NH-pi_1.05	3.10912	56_Benzene-MeNH2_NH-pi_1.05	-327.574	-231.853	-95.715	-231.853	-95.715		3.61997	3.59249	3.60623	0.02748		-327.568	-231.85	-95.7131	-231.85	-95.713		3.65741	3.5652	3.6113	0.0922122		56_Benzene-MeNH2_NH-pi_1.05	-327.578	-231.849	-95.7245	-231.849	-95.7245		2.74357	2.71711	2.73034	0.0264584			56_Benzene-MeNH2_NH-pi_1.05	-326.06	-230.797	-95.2628	-230.797	-95.2628		56_Benzene-MeNH2_NH-pi_1.05.out:	-326.056	-230.795	-95.2617	-230.795
56_Benzene-MeNH2_NH-pi_1.10	2.86149	56_Benzene-MeNH2_NH-pi_1.10	-327.574	-231.853	-95.715	-231.853	-95.715		3.2631	3.23866	3.25088	0.0244365		-327.568	-231.85	-95.7131	-231.85	-95.713		3.29529	3.21411	3.2547	0.0811815		56_Benzene-MeNH2_NH-pi_1.10	-327.578	-231.849	-95.7245	-231.849	-95.7245		2.55871	2.53522	2.54697	0.0234911			56_Benzene-MeNH2_NH-pi_1.10	-326.06	-230.797	-95.2628	-230.797	-95.2628		56_Benzene-MeNH2_NH-pi_1.10.out:	-326.057	-230.795	-95.2617	-230.795
56_Benzene-MeNH2_NH-pi_1.25	1.96023	56_Benzene-MeNH2_NH-pi_1.25	-327.572	-231.853	-95.715	-231.853	-95.715		2.17207	2.15481	2.16344	0.0172617		-327.566	-231.85	-95.7131	-231.85	-95.713		2.19108	2.13771	2.16439	0.0533727		56_Benzene-MeNH2_NH-pi_1.25	-327.577	-231.849	-95.7245	-231.849	-95.7245		1.79368	1.77718	1.78543	0.0165066			56_Benzene-MeNH2_NH-pi_1.25	-326.061	-230.797	-95.2628	-230.797	-95.2628		56_Benzene-MeNH2_NH-pi_1.25.out:	-326.058	-230.795	-95.2617	-230.795
56_Benzene-MeNH2_NH-pi_1.50	0.950967	56_Benzene-MeNH2_NH-pi_1.50	-327.57	-231.853	-95.715	-231.853	-95.715		1.03643	1.02773	1.03208	0.00869768		-327.564	-231.85	-95.7131	-231.85	-95.713		1.0467	1.02024	1.03347	0.026458		56_Benzene-MeNH2_NH-pi_1.50	-327.575	-231.849	-95.7245	-231.849	-95.7245		0.888193	0.880018	0.884105	0.00817492			56_Benzene-MeNH2_NH-pi_1.50	-326.061	-230.797	-95.2628	-230.797	-95.2628		56_Benzene-MeNH2_NH-pi_1.50.out:	-326.058	-230.795	-95.2617	-230.795
56_Benzene-MeNH2_NH-pi_2.00	0.267291	56_Benzene-MeNH2_NH-pi_2.00	-327.569	-231.853	-95.715	-231.853	-95.715		0.286209	0.283895	0.285052	0.00231415		-327.563	-231.85	-95.7131	-231.85	-95.713		0.292298	0.282334	0.287316	0.00996387		56_Benzene-MeNH2_NH-pi_2.00	-327.574	-231.849	-95.7245	-231.849	-95.7245		0.255086	0.252904	0.253995	0.0021816			56_Benzene-MeNH2_NH-pi_2.00	-326.06	-230.797	-95.2628	-230.797	-95.2628		56_Benzene-MeNH2_NH-pi_2.00.out:	-326.057	-230.795	-95.2616	-230.795
57_Benzene-Peptide_NH-pi_0.90	3.75648	57_Benzene-Peptide_NH-pi_0.90	-480.052	-231.853	-248.19	-231.853	-248.19		5.36246	5.31502	5.33874	0.0474467		-480.043	-231.85	-248.185	-231.849	-248.185		5.44782	5.27263	5.36022	0.175186		57_Benzene-Peptide_NH-pi_0.90	-480.048	-231.849	-248.194	-231.849	-248.194		2.94871	2.90228	2.92549	0.0464377			57_Benzene-Peptide_NH-pi_0.90	-477.91	-230.797	-247.122	-230.797	-247.122		57_Benzene-Peptide_NH-pi_0.90.out:	-477.905	-230.795	-247.119	-230.795
57_Benzene-Peptide_NH-pi_0.95	4.97835	57_Benzene-Peptide_NH-pi_0.95	-480.054	-231.853	-248.19	-231.853	-248.19		6.20078	6.15831	6.17955	0.0424707		-480.045	-231.85	-248.185	-231.849	-248.185		6.27575	6.12155	6.19865	0.154201		57_Benzene-Peptide_NH-pi_0.95	-480.05	-231.849	-248.194	-231.849	-248.194		4.27585	4.23447	4.25516	0.0413813			57_Benzene-Peptide_NH-pi_0.95	-477.915	-230.797	-247.122	-230.797	-247.122		57_Benzene-Peptide_NH-pi_0.95.out:	-477.91	-230.795	-247.119	-230.795
57_Benzene-Peptide_NH-pi_1.00	5.31335	57_Benzene-Peptide_NH-pi_1.00	-480.054	-231.853	-248.19	-231.853	-248.19		6.25549	6.21734	6.23642	0.0381491		-480.045	-231.85	-248.185	-231.849	-248.185		6.32129	6.1851	6.25319	0.136187		57_Benzene-Peptide_NH-pi_1.00	-480.051	-231.849	-248.194	-231.849	-248.194		4.71019	4.67316	4.69168	0.0370369			57_Benzene-Peptide_NH-pi_1.00	-477.918	-230.797	-247.122	-230.797	-247.122		57_Benzene-Peptide_NH-pi_1.00.out:	-477.913	-230.795	-247.119	-230.795
57_Benzene-Peptide_NH-pi_1.05	5.18284	57_Benzene-Peptide_NH-pi_1.05	-480.053	-231.853	-248.19	-231.853	-248.19		5.91748	5.88353	5.90051	0.0339586		-480.044	-231.85	-248.185	-231.849	-248.185		5.9752	5.85452	5.91486	0.12068		57_Benzene-Peptide_NH-pi_1.05	-480.051	-231.849	-248.194	-231.849	-248.194		4.66989	4.63701	4.65345	0.0328826			57_Benzene-Peptide_NH-pi_1.05	-477.92	-230.797	-247.122	-230.797	-247.122		57_Benzene-Peptide_NH-pi_1.05.out:	-477.915	-230.795	-247.119	-230.795
57_Benzene-Peptide_NH-pi_1.10	4.82458	57_Benzene-Peptide_NH-pi_1.10	-480.052	-231.853	-248.19	-231.853	-248.19		5.40573	5.3749	5.39032	0.030835		-480.043	-231.85	-248.185	-231.849	-248.185		5.45619	5.34906	5.40262	0.107135		57_Benzene-Peptide_NH-pi_1.10	-480.051	-231.849	-248.194	-231.849	-248.194		4.39264	4.36283	4.37773	0.0298162			57_Benzene-Peptide_NH-pi_1.10	-477.921	-230.797	-247.122	-230.797	-247.122		57_Benzene-Peptide_NH-pi_1.10.out:	-477.916	-230.795	-247.119	-230.795
57_Benzene-Peptide_NH-pi_1.25	3.45789	57_Benzene-Peptide_NH-pi_1.25	-480.05	-231.853	-248.19	-231.853	-248.19		3.76709	3.7447	3.75589	0.0223965		-480.041	-231.85	-248.185	-231.849	-248.185		3.79861	3.7252	3.7619	0.07341		57_Benzene-Peptide_NH-pi_1.25	-480.049	-231.849	-248.194	-231.849	-248.194		3.20663	3.18506	3.19585	0.0215655			57_Benzene-Peptide_NH-pi_1.25	-477.921	-230.797	-247.122	-230.797	-247.122		57_Benzene-Peptide_NH-pi_1.25.out:	-477.916	-230.795	-247.119	-230.795
57_Benzene-Peptide_NH-pi_1.50	1.83675	57_Benzene-Peptide_NH-pi_1.50	-480.047	-231.853	-248.19	-231.853	-248.19		1.9655	1.95345	1.95947	0.0120488		-480.038	-231.85	-248.185	-231.849	-248.185		1.98051	1.94293	1.96172	0.0375811		57_Benzene-Peptide_NH-pi_1.50	-480.046	-231.849	-248.194	-231.849	-248.194		1.73345	1.722	1.72773	0.0114556			57_Benzene-Peptide_NH-pi_1.50	-477.921	-230.797	-247.122	-230.797	-247.122		57_Benzene-Peptide_NH-pi_1.50.out:	-477.916	-230.795	-247.119	-230.795
57_Benzene-Peptide_NH-pi_2.00	0.632287	57_Benzene-Peptide_NH-pi_2.00	-480.045	-231.853	-248.19	-231.853	-248.19		0.665722	0.661495	0.663609	0.00422747		-480.036	-231.85	-248.185	-231.849	-248.185		0.674377	0.658764	0.666571	0.0156138		57_Benzene-Peptide_NH-pi_2.00	-480.045	-231.849	-248.194	-231.849	-248.194		0.609817	0.605844	0.60783	0.00397366			57_Benzene-Peptide_NH-pi_2.00	-477.92	-230.797	-247.122	-230.797	-247.122		57_Benzene-Peptide_NH-pi_2.00.out:	-477.915	-230.795	-247.119	-230.795
58_Pyridine-Pyridine_CH-N_0.90	2.98855	58_Pyridine-Pyridine_CH-N_0.90	-495.79	-247.892	-247.892	-247.892	-247.892		3.32495	3.29994	3.31245	0.0250133		-495.782	-247.888	-247.888	-247.888	-247.888		3.34002	3.26381	3.30191	0.0762164		58_Pyridine-Pyridine_CH-N_0.90	-495.772	-247.884	-247.884	-247.884	-247.884		2.00244	1.97692	1.98968	0.0255231			58_Pyridine-Pyridine_CH-N_0.90	-493.588	-246.796	-246.796	-246.796	-246.796		58_Pyridine-Pyridine_CH-N_0.90.out:	-493.583	-246.793	-246.793	-246.793
58_Pyridine-Pyridine_CH-N_0.95	3.9696	58_Pyridine-Pyridine_CH-N_0.95	-495.792	-247.892	-247.892	-247.892	-247.892		4.19138	4.16887	4.18012	0.0225081		-495.783	-247.888	-247.888	-247.888	-247.888		4.2016	4.13652	4.16906	0.0650793		58_Pyridine-Pyridine_CH-N_0.95	-495.774	-247.884	-247.884	-247.884	-247.884		3.1328	3.10995	3.12138	0.0228484			58_Pyridine-Pyridine_CH-N_0.95	-493.591	-246.796	-246.796	-246.796	-246.796		58_Pyridine-Pyridine_CH-N_0.95.out:	-493.587	-246.793	-246.793	-246.793
58_Pyridine-Pyridine_CH-N_1.00	4.25883	58_Pyridine-Pyridine_CH-N_1.00	-495.792	-247.892	-247.892	-247.892	-247.892		4.38289	4.36407	4.37348	0.0188283		-495.783	-247.888	-247.888	-247.888	-247.888		4.38802	4.33561	4.36181	0.0524045		58_Pyridine-Pyridine_CH-N_1.00	-495.775	-247.884	-247.884	-247.884	-247.884		3.60402	3.58504	3.59453	0.0189788			58_Pyridine-Pyridine_CH-N_1.00	-493.594	-246.796	-246.796	-246.796	-246.796		58_Pyridine-Pyridine_CH-N_1.00.out:	-493.589	-246.793	-246.793	-246.793
58_Pyridine-Pyridine_CH-N_1.05	3.97335	58_Pyridine-Pyridine_CH-N_1.05	-495.791	-247.892	-247.892	-247.892	-247.892		4.04747	4.03186	4.03966	0.0156105		-495.783	-247.888	-247.888	-247.888	-247.888		4.04959	4.00657	4.02808	0.0430212		58_Pyridine-Pyridine_CH-N_1.05	-495.774	-247.884	-247.884	-247.884	-247.884		3.45747	3.44182	3.44964	0.0156457			58_Pyridine-Pyridine_CH-N_1.05	-493.594	-246.796	-246.796	-246.796	-246.796		58_Pyridine-Pyridine_CH-N_1.05.out:	-493.589	-246.793	-246.793	-246.793
58_Pyridine-Pyridine_CH-N_1.10	3.51736	58_Pyridine-Pyridine_CH-N_1.10	-495.791	-247.892	-247.892	-247.892	-247.892		3.56482	3.55207	3.55844	0.0127579		-495.782	-247.888	-247.888	-247.888	-247.888		3.56513	3.52945	3.54729	0.0356858		58_Pyridine-Pyridine_CH-N_1.10	-495.774	-247.884	-247.884	-247.884	-247.884		3.10756	3.09483	3.1012	0.0127299			58_Pyridine-Pyridine_CH-N_1.10	-493.594	-246.796	-246.796	-246.796	-246.796		58_Pyridine-Pyridine_CH-N_1.10.out:	-493.59	-246.793	-246.793	-246.793
58_Pyridine-Pyridine_CH-N_1.25	2.22589	58_Pyridine-Pyridine_CH-N_1.25	-495.789	-247.892	-247.892	-247.892	-247.892		2.24542	2.23801	2.24171	0.0074064		-495.78	-247.888	-247.888	-247.888	-247.888		2.24479	2.22306	2.23392	0.0217243		58_Pyridine-Pyridine_CH-N_1.25	-495.772	-247.884	-247.884	-247.884	-247.884		2.01042	2.00312	2.00677	0.00729573			58_Pyridine-Pyridine_CH-N_1.25	-493.594	-246.796	-246.796	-246.796	-246.796		58_Pyridine-Pyridine_CH-N_1.25.out:	-493.589	-246.793	-246.793	-246.793
58_Pyridine-Pyridine_CH-N_1.50	1.04091	58_Pyridine-Pyridine_CH-N_1.50	-495.787	-247.892	-247.892	-247.892	-247.892		1.04747	1.04402	1.04574	0.00345248		-495.778	-247.888	-247.888	-247.888	-247.888		1.04807	1.03633	1.0422	0.011733		58_Pyridine-Pyridine_CH-N_1.50	-495.77	-247.884	-247.884	-247.884	-247.884		0.951019	0.947654	0.949337	0.00336501			58_Pyridine-Pyridine_CH-N_1.50	-493.593	-246.796	-246.796	-246.796	-246.796		58_Pyridine-Pyridine_CH-N_1.50.out:	-493.588	-246.793	-246.793	-246.793
58_Pyridine-Pyridine_CH-N_2.00	0.287246	58_Pyridine-Pyridine_CH-N_2.00	-495.785	-247.892	-247.892	-247.892	-247.892		0.289183	0.287986	0.288585	0.00119725		-495.777	-247.888	-247.888	-247.888	-247.888		0.290213	0.285362	0.287787	0.00485083		58_Pyridine-Pyridine_CH-N_2.00	-495.769	-247.884	-247.884	-247.884	-247.884		0.263337	0.262171	0.262754	0.00116607			58_Pyridine-Pyridine_CH-N_2.00	-493.592	-246.796	-246.796	-246.796	-246.796		58_Pyridine-Pyridine_CH-N_2.00.out:	-493.587	-246.793	-246.793	-246.793
59_Ethyne-Water_CH-O_0.90	2.60809	59_Ethyne-Water_CH-O_0.90	-153.572	-77.2003	-76.3675	-77.2003	-76.3675		2.5987	2.57607	2.58739	0.0226241		-153.568	-77.1987	-76.3655	-77.1987	-76.3654		2.6072	2.5516	2.5794	0.0555984		59_Ethyne-Water_CH-O_0.90	-153.576	-77.2042	-76.3685	-77.2042	-76.3685		2.14198	2.11987	2.13093	0.0221187			59_Ethyne-Water_CH-O_0.90	-152.924	-76.8543	-76.0671	-76.8543	-76.0671		59_Ethyne-Water_CH-O_0.90.out:	-152.922	-76.8536	-76.0661	-76.8536
59_Ethyne-Water_CH-O_0.95	2.87259	59_Ethyne-Water_CH-O_0.95	-153.572	-77.2003	-76.3675	-77.2003	-76.3675		2.85221	2.83144	2.84183	0.0207732		-153.569	-77.1987	-76.3655	-77.1987	-76.3654		2.86104	2.81071	2.83587	0.0503264		59_Ethyne-Water_CH-O_0.95	-153.577	-77.2042	-76.3685	-77.2042	-76.3685		2.48239	2.46214	2.47227	0.0202465			59_Ethyne-Water_CH-O_0.95	-152.925	-76.8543	-76.0671	-76.8543	-76.0671		59_Ethyne-Water_CH-O_0.95.out:	-152.923	-76.8536	-76.0661	-76.8536
59_Ethyne-Water_CH-O_1.00	2.90708	59_Ethyne-Water_CH-O_1.00	-153.572	-77.2003	-76.3675	-77.2003	-76.3675		2.88348	2.86448	2.87398	0.0190026		-153.569	-77.1987	-76.3655	-77.1987	-76.3654		2.89254	2.84675	2.86965	0.0457901		59_Ethyne-Water_CH-O_1.00	-153.577	-77.2042	-76.3685	-77.2042	-76.3685		2.58283	2.56436	2.5736	0.018464			59_Ethyne-Water_CH-O_1.00	-152.925	-76.8543	-76.0671	-76.8543	-76.0671		59_Ethyne-Water_CH-O_1.00.out:	-152.923	-76.8536	-76.0661	-76.8536
59_Ethyne-Water_CH-O_1.05	2.80691	59_Ethyne-Water_CH-O_1.05	-153.572	-77.2003	-76.3675	-77.2003	-76.3675		2.78446	2.76713	2.77579	0.0173276		-153.569	-77.1987	-76.3655	-77.1987	-76.3654		2.7937	2.75188	2.77279	0.0418216		59_Ethyne-Water_CH-O_1.05	-153.577	-77.2042	-76.3685	-77.2042	-76.3685		2.53909	2.5223	2.5307	0.0167864			59_Ethyne-Water_CH-O_1.05	-152.925	-76.8543	-76.0671	-76.8543	-76.0671		59_Ethyne-Water_CH-O_1.05.out:	-152.923	-76.8536	-76.0661	-76.8536
59_Ethyne-Water_CH-O_1.10	2.6342	59_Ethyne-Water_CH-O_1.10	-153.572	-77.2003	-76.3675	-77.2003	-76.3675		2.61496	2.59919	2.60708	0.0157696		-153.568	-77.1987	-76.3655	-77.1987	-76.3654		2.62439	2.58602	2.60521	0.0383683		59_Ethyne-Water_CH-O_1.10	-153.576	-77.2042	-76.3685	-77.2042	-76.3685		2.41377	2.39854	2.40616	0.0152338			59_Ethyne-Water_CH-O_1.10	-152.925	-76.8543	-76.0671	-76.8543	-76.0671		59_Ethyne-Water_CH-O_1.10.out:	-152.923	-76.8536	-76.0661	-76.8536
59_Ethyne-Water_CH-O_1.25	2.00295	59_Ethyne-Water_CH-O_1.25	-153.571	-77.2003	-76.3675	-77.2003	-76.3675		1.9943	1.9825	1.9884	0.0117957		-153.567	-77.1987	-76.3655	-77.1987	-76.3654		2.00405	1.97392	1.98899	0.0301398		59_Ethyne-Water_CH-O_1.25	-153.576	-77.2042	-76.3685	-77.2042	-76.3685		1.88011	1.8688	1.87446	0.0113026			59_Ethyne-Water_CH-O_1.25	-152.924	-76.8543	-76.0671	-76.8543	-76.0671		59_Ethyne-Water_CH-O_1.25.out:	-152.923	-76.8536	-76.0661	-76.8536
59_Ethyne-Water_CH-O_1.50	1.18234	59_Ethyne-Water_CH-O_1.50	-153.57	-77.2003	-76.3675	-77.2003	-76.3675		1.18176	1.17439	1.17808	0.00736418		-153.566	-77.1987	-76.3654	-77.1987	-76.3654		1.19038	1.16972	1.18005	0.0206615		59_Ethyne-Water_CH-O_1.50	-153.574	-77.2042	-76.3685	-77.2042	-76.3685		1.13262	1.12565	1.12913	0.00696792			59_Ethyne-Water_CH-O_1.50	-152.923	-76.8543	-76.0671	-76.8543	-76.0671		59_Ethyne-Water_CH-O_1.50.out:	-152.922	-76.8536	-76.0661	-76.8536
59_Ethyne-Water_CH-O_2.00	0.461369	59_Ethyne-Water_CH-O_2.00	-153.568	-77.2003	-76.3675	-77.2003	-76.3675		0.466005	0.462671	0.464338	0.00333382		-153.565	-77.1987	-76.3654	-77.1987	-76.3654		0.471675	0.460978	0.466326	0.0106967		59_Ethyne-Water_CH-O_2.00	-153.573	-77.2042	-76.3685	-77.2042	-76.3685		0.453233	0.450146	0.45169	0.00308724			59_Ethyne-Water_CH-O_2.00	-152.922	-76.8543	-76.0671	-76.8543	-76.0671		59_Ethyne-Water_CH-O_2.00.out:	-152.92	-76.8536	-76.0661	-76.8536
60_Ethyne-AcOH_OH-pi_0.90	4.36371	60_Ethyne-AcOH_OH-pi_0.90	-306.04	-77.2003	-228.833	-77.2002	-228.833		4.6473	4.59656	4.62193	0.0507492		-306.034	-77.1989	-228.828	-77.1987	-228.827		4.72648	4.56742	4.64695	0.159054		60_Ethyne-AcOH_OH-pi_0.90	-306.04	-77.2042	-228.83	-77.2041	-228.83		3.58621	3.53678	3.5615	0.0494355			60_Ethyne-AcOH_OH-pi_0.90	-304.779	-76.8542	-227.923	-76.8542	-227.923		60_Ethyne-AcOH_OH-pi_0.90.out:	-304.776	-76.8535	-227.921	-76.8534
60_Ethyne-AcOH_OH-pi_0.95	4.84398	60_Ethyne-AcOH_OH-pi_0.95	-306.041	-77.2002	-228.833	-77.2002	-228.833		5.04355	4.99671	5.02013	0.0468415		-306.034	-77.1988	-228.828	-77.1987	-228.827		5.11499	4.97015	5.04257	0.144837		60_Ethyne-AcOH_OH-pi_0.95	-306.041	-77.2042	-228.83	-77.2041	-228.83		4.17365	4.12815	4.1509	0.0454928			60_Ethyne-AcOH_OH-pi_0.95	-304.781	-76.8542	-227.923	-76.8542	-227.923		60_Ethyne-AcOH_OH-pi_0.95.out:	-304.778	-76.8535	-227.921	-76.8534
60_Ethyne-AcOH_OH-pi_1.00	4.90792	60_Ethyne-AcOH_OH-pi_1.00	-306.041	-77.2002	-228.833	-77.2002	-228.833		5.04952	5.00639	5.02795	0.0431272		-306.034	-77.1988	-228.828	-77.1987	-228.827		5.11385	4.98197	5.04791	0.131881		60_Ethyne-AcOH_OH-pi_1.00	-306.041	-77.2042	-228.83	-77.2041	-228.83		4.33393	4.29216	4.31305	0.0417685			60_Ethyne-AcOH_OH-pi_1.00	-304.782	-76.8542	-227.923	-76.8542	-227.923		60_Ethyne-AcOH_OH-pi_1.00.out:	-304.778	-76.8535	-227.921	-76.8534
60_Ethyne-AcOH_OH-pi_1.05	4.72711	60_Ethyne-AcOH_OH-pi_1.05	-306.041	-77.2002	-228.833	-77.2002	-228.833		4.82879	4.78919	4.80899	0.0396003		-306.034	-77.1988	-228.828	-77.1987	-228.827		4.8866	4.7666	4.8266	0.120008		60_Ethyne-AcOH_OH-pi_1.05	-306.041	-77.2042	-228.83	-77.2041	-228.83		4.23837	4.20012	4.21924	0.0382499			60_Ethyne-AcOH_OH-pi_1.05	-304.782	-76.8542	-227.923	-76.8542	-227.923		60_Ethyne-AcOH_OH-pi_1.05.out:	-304.779	-76.8535	-227.921	-76.8534
60_Ethyne-AcOH_OH-pi_1.10	4.41354	60_Ethyne-AcOH_OH-pi_1.10	-306.04	-77.2002	-228.833	-77.2002	-228.833		4.48767	4.45142	4.46954	0.0362473		-306.033	-77.1988	-228.828	-77.1987	-228.827		4.53952	4.43034	4.48493	0.10918		60_Ethyne-AcOH_OH-pi_1.10	-306.041	-77.2042	-228.83	-77.2041	-228.83		3.99876	3.96384	3.9813	0.034917			60_Ethyne-AcOH_OH-pi_1.10	-304.782	-76.8542	-227.923	-76.8542	-227.923		60_Ethyne-AcOH_OH-pi_1.10.out:	-304.779	-76.8535	-227.921	-76.8534
60_Ethyne-AcOH_OH-pi_1.25	3.26262	60_Ethyne-AcOH_OH-pi_1.25	-306.038	-77.2002	-228.833	-77.2002	-228.833		3.29286	3.26564	3.27925	0.0272162		-306.031	-77.1988	-228.827	-77.1987	-228.827		3.32976	3.24711	3.28843	0.0826481		60_Ethyne-AcOH_OH-pi_1.25	-306.039	-77.2041	-228.83	-77.2041	-228.83		3.00944	2.98344	2.99644	0.0259948			60_Ethyne-AcOH_OH-pi_1.25	-304.782	-76.8542	-227.923	-76.8542	-227.923		60_Ethyne-AcOH_OH-pi_1.25.out:	-304.778	-76.8535	-227.921	-76.8534
60_Ethyne-AcOH_OH-pi_1.50	1.77638	60_Ethyne-AcOH_OH-pi_1.50	-306.036	-77.2002	-228.833	-77.2002	-228.833		1.78294	1.7663	1.77462	0.0166408		-306.029	-77.1987	-228.827	-77.1987	-228.827		1.80047	1.75026	1.77536	0.0502128		60_Ethyne-AcOH_OH-pi_1.50	-306.037	-77.2041	-228.83	-77.2041	-228.83		1.66065	1.64492	1.65278	0.0157276			60_Ethyne-AcOH_OH-pi_1.50	-304.78	-76.8542	-227.923	-76.8542	-227.923		60_Ethyne-AcOH_OH-pi_1.50.out:	-304.777	-76.8535	-227.921	-76.8534
60_Ethyne-AcOH_OH-pi_2.00	0.559371	60_Ethyne-AcOH_OH-pi_2.00	-306.034	-77.2002	-228.833	-77.2002	-228.833		0.560931	0.55474	0.557835	0.00619072		-306.027	-77.1987	-228.827	-77.1987	-228.827		0.564282	0.548878	0.55658	0.0154041		60_Ethyne-AcOH_OH-pi_2.00	-306.035	-77.2041	-228.83	-77.2041	-228.83		0.531722	0.525964	0.528843	0.00575862			60_Ethyne-AcOH_OH-pi_2.00	-304.778	-76.8542	-227.923	-76.8542	-227.923		60_Ethyne-AcOH_OH-pi_2.00.out:	-304.775	-76.8535	-227.921	-76.8534
61_Pentane-AcOH_0.90	2.74138	61_Pentane-AcOH_0.90	-426.245	-197.408	-228.833	-197.408	-228.833		2.91786	2.87456	2.89621	0.0432934		-426.236	-197.404	-228.828	-197.404	-228.828		2.93996	2.8378	2.88888	0.102157		61_Pentane-AcOH_0.90	-426.264	-197.431	-228.831	-197.431	-228.83		1.45654	1.41521	1.43588	0.0413282			61_Pentane-AcOH_0.90	-424.337	-196.419	-227.924	-196.419	-227.924		61_Pentane-AcOH_0.90.out:	-424.332	-196.417	-227.921	-196.417
61_Pentane-AcOH_0.95	2.93781	61_Pentane-AcOH_0.95	-426.245	-197.408	-228.833	-197.408	-228.833		3.06508	3.02554	3.04531	0.0395342		-426.237	-197.404	-228.828	-197.404	-228.828		3.08396	2.99212	3.03804	0.0918333		61_Pentane-AcOH_0.95	-426.264	-197.431	-228.831	-197.431	-228.83		1.83672	1.79912	1.81792	0.0375996			61_Pentane-AcOH_0.95	-424.339	-196.419	-227.924	-196.419	-227.924		61_Pentane-AcOH_0.95.out:	-424.334	-196.417	-227.921	-196.417
61_Pentane-AcOH_1.00	2.91301	61_Pentane-AcOH_1.00	-426.245	-197.408	-228.833	-197.408	-228.833		3.00593	2.9699	2.98792	0.0360293		-426.236	-197.404	-228.828	-197.404	-228.828		3.02214	2.93972	2.98093	0.0824219		61_Pentane-AcOH_1.00	-426.264	-197.431	-228.831	-197.431	-228.83		1.97113	1.93698	1.95406	0.0341486			61_Pentane-AcOH_1.00	-424.34	-196.419	-227.924	-196.419	-227.924		61_Pentane-AcOH_1.00.out:	-424.335	-196.417	-227.921	-196.417
61_Pentane-AcOH_1.05	2.76125	61_Pentane-AcOH_1.05	-426.245	-197.408	-228.833	-197.408	-228.833		2.82999	2.79734	2.81366	0.0326517		-426.236	-197.404	-228.828	-197.404	-228.828		2.84393	2.7701	2.80701	0.0738261		61_Pentane-AcOH_1.05	-426.264	-197.431	-228.831	-197.431	-228.83		1.95661	1.92576	1.94119	0.0308497			61_Pentane-AcOH_1.05	-424.341	-196.419	-227.924	-196.419	-227.924		61_Pentane-AcOH_1.05.out:	-424.336	-196.417	-227.921	-196.417
61_Pentane-AcOH_1.10	2.5436	61_Pentane-AcOH_1.10	-426.244	-197.408	-228.833	-197.408	-228.833		2.59548	2.56597	2.58073	0.0295099		-426.236	-197.404	-228.828	-197.404	-228.828		2.60744	2.54146	2.57445	0.0659771		61_Pentane-AcOH_1.10	-426.264	-197.431	-228.831	-197.431	-228.83		1.85659	1.82878	1.84269	0.0278081			61_Pentane-AcOH_1.10	-424.342	-196.419	-227.924	-196.419	-227.924		61_Pentane-AcOH_1.10.out:	-424.337	-196.417	-227.921	-196.417
61_Pentane-AcOH_1.25	1.81196	61_Pentane-AcOH_1.25	-426.243	-197.408	-228.833	-197.408	-228.833		1.83783	1.81635	1.82709	0.0214796		-426.235	-197.404	-228.828	-197.404	-228.828		1.84496	1.79868	1.82182	0.046279		61_Pentane-AcOH_1.25	-426.263	-197.431	-228.831	-197.431	-228.83		1.38391	1.36377	1.37384	0.0201397			61_Pentane-AcOH_1.25	-424.342	-196.419	-227.924	-196.419	-227.924		61_Pentane-AcOH_1.25.out:	-424.337	-196.417	-227.921	-196.417
61_Pentane-AcOH_1.50	0.802397	61_Pentane-AcOH_1.50	-426.242	-197.408	-228.833	-197.408	-228.833		0.811743	0.801558	0.806651	0.010185		-426.233	-197.404	-228.828	-197.404	-228.828		0.814473	0.79208	0.803276	0.0223937		61_Pentane-AcOH_1.50	-426.262	-197.431	-228.83	-197.431	-228.83		0.628074	0.618536	0.623305	0.00953813			61_Pentane-AcOH_1.50	-424.343	-196.419	-227.924	-196.419	-227.924		61_Pentane-AcOH_1.50.out:	-424.338	-196.417	-227.921	-196.417
61_Pentane-AcOH_2.00	0.177279	61_Pentane-AcOH_2.00	-426.241	-197.408	-228.833	-197.408	-228.833		0.179085	0.176224	0.177655	0.00286054		-426.232	-197.404	-228.828	-197.404	-228.828		0.181178	0.174058	0.177618	0.00711952		61_Pentane-AcOH_2.00	-426.261	-197.431	-228.83	-197.431	-228.83		0.138025	0.135324	0.136675	0.00270046			61_Pentane-AcOH_2.00	-424.343	-196.419	-227.924	-196.419	-227.924		61_Pentane-AcOH_2.00.out:	-424.338	-196.417	-227.921	-196.417
62_Pentane-AcNH2_0.90	3.19348	62_Pentane-AcNH2_0.90	-406.368	-197.408	-208.955	-197.408	-208.955		3.42396	3.37489	3.39942	0.0490682		-406.36	-197.404	-208.951	-197.404	-208.951		3.46437	3.33321	3.39879	0.131164		62_Pentane-AcNH2_0.90	-406.389	-197.431	-208.956	-197.431	-208.956		1.64746	1.6006	1.62403	0.0468564			62_Pentane-AcNH2_0.90	-404.491	-196.419	-208.079	-196.419	-208.079		62_Pentane-AcNH2_0.90.out:	-404.487	-196.417	-208.077	-196.417
62_Pentane-AcNH2_0.95	3.53833	62_Pentane-AcNH2_0.95	-406.369	-197.408	-208.955	-197.408	-208.955		3.69067	3.64585	3.66826	0.0448224		-406.361	-197.404	-208.951	-197.404	-208.951		3.7255	3.60799	3.66675	0.117511		62_Pentane-AcNH2_0.95	-406.39	-197.431	-208.956	-197.431	-208.956		2.2295	2.1869	2.2082	0.0426039			62_Pentane-AcNH2_0.95	-404.494	-196.419	-208.079	-196.419	-208.079		62_Pentane-AcNH2_0.95.out:	-404.489	-196.417	-208.077	-196.417
62_Pentane-AcNH2_1.00	3.53992	62_Pentane-AcNH2_1.00	-406.369	-197.408	-208.955	-197.408	-208.955		3.64109	3.6002	3.62064	0.0408906		-406.361	-197.404	-208.951	-197.404	-208.951		3.67117	3.56599	3.61858	0.10518		62_Pentane-AcNH2_1.00	-406.391	-197.431	-208.956	-197.431	-208.956		2.43442	2.39572	2.41507	0.0386972			62_Pentane-AcNH2_1.00	-404.496	-196.419	-208.079	-196.419	-208.079		62_Pentane-AcNH2_1.00.out:	-404.491	-196.417	-208.077	-196.417
62_Pentane-AcNH2_1.05	3.35251	62_Pentane-AcNH2_1.05	-406.368	-197.408	-208.955	-197.408	-208.955		3.4204	3.3832	3.4018	0.0372016		-406.36	-197.404	-208.951	-197.404	-208.951		3.44654	3.35247	3.3995	0.0940653		62_Pentane-AcNH2_1.05	-406.391	-197.431	-208.956	-197.431	-208.956		2.42031	2.38525	2.40278	0.0350616			62_Pentane-AcNH2_1.05	-404.497	-196.419	-208.079	-196.419	-208.079		62_Pentane-AcNH2_1.05.out:	-404.492	-196.417	-208.077	-196.417
62_Pentane-AcNH2_1.10	3.07219	62_Pentane-AcNH2_1.10	-406.368	-197.408	-208.955	-197.408	-208.955		3.11869	3.08492	3.1018	0.033764		-406.36	-197.404	-208.951	-197.404	-208.951		3.14148	3.0574	3.09944	0.0840781		62_Pentane-AcNH2_1.10	-406.39	-197.431	-208.956	-197.431	-208.956		2.28644	2.25474	2.27059	0.0317024			62_Pentane-AcNH2_1.10	-404.498	-196.419	-208.079	-196.419	-208.079		62_Pentane-AcNH2_1.10.out:	-404.493	-196.417	-208.077	-196.417
62_Pentane-AcNH2_1.25	2.14015	62_Pentane-AcNH2_1.25	-406.366	-197.408	-208.955	-197.408	-208.955		2.15881	2.13403	2.14642	0.0247764		-406.358	-197.404	-208.951	-197.404	-208.951		2.17352	2.11428	2.1439	0.0592434		62_Pentane-AcNH2_1.25	-406.39	-197.431	-208.956	-197.431	-208.956		1.66782	1.64476	1.65629	0.0230605			62_Pentane-AcNH2_1.25	-404.499	-196.419	-208.079	-196.419	-208.079		62_Pentane-AcNH2_1.25.out:	-404.494	-196.417	-208.077	-196.417
62_Pentane-AcNH2_1.50	1.06071	62_Pentane-AcNH2_1.50	-406.365	-197.408	-208.955	-197.408	-208.955		1.06993	1.05654	1.06323	0.0133915		-406.357	-197.404	-208.951	-197.404	-208.951		1.07706	1.04454	1.0608	0.0325207		62_Pentane-AcNH2_1.50	-406.388	-197.431	-208.956	-197.431	-208.956		0.84983	0.837453	0.843641	0.0123769			62_Pentane-AcNH2_1.50	-404.499	-196.419	-208.079	-196.419	-208.079		62_Pentane-AcNH2_1.50.out:	-404.494	-196.417	-208.077	-196.417
62_Pentane-AcNH2_2.00	0.283102	62_Pentane-AcNH2_2.00	-406.363	-197.408	-208.955	-197.408	-208.955		0.286026	0.281682	0.283854	0.00434386		-406.355	-197.404	-208.951	-197.404	-208.951		0.290195	0.278301	0.284248	0.0118936		62_Pentane-AcNH2_2.00	-406.387	-197.431	-208.956	-197.431	-208.956		0.230601	0.226557	0.228579	0.00404348			62_Pentane-AcNH2_2.00	-404.499	-196.419	-208.079	-196.419	-208.079		62_Pentane-AcNH2_2.00.out:	-404.494	-196.417	-208.077	-196.417
63_Benzene-AcOH_0.90	2.69145	63_Benzene-AcOH_0.90	-460.693	-231.853	-228.833	-231.853	-228.833		4.04531	3.98903	4.01717	0.0562887		-460.684	-231.85	-228.828	-231.85	-228.828		4.10753	3.93862	4.02307	0.168916		63_Benzene-AcOH_0.90	-460.683	-231.849	-228.83	-231.849	-228.83		1.97581	1.92177	1.94879	0.054038			63_Benzene-AcOH_0.90	-458.712	-230.797	-227.923	-230.797	-227.923		63_Benzene-AcOH_0.90.out:	-458.707	-230.795	-227.921	-230.795
63_Benzene-AcOH_0.95	3.58124	63_Benzene-AcOH_0.95	-460.693	-231.853	-228.833	-231.853	-228.833		4.61081	4.56061	4.58571	0.0501993		-460.684	-231.85	-228.828	-231.85	-228.828		4.66324	4.51409	4.58867	0.149149		63_Benzene-AcOH_0.95	-460.684	-231.849	-228.83	-231.849	-228.83		2.95995	2.91191	2.93593	0.0480383			63_Benzene-AcOH_0.95	-458.716	-230.797	-227.923	-230.797	-227.923		63_Benzene-AcOH_0.95.out:	-458.711	-230.795	-227.921	-230.795
63_Benzene-AcOH_1.00	3.79787	63_Benzene-AcOH_1.00	-460.693	-231.853	-228.833	-231.853	-228.833		4.58761	4.54282	4.56521	0.0447885		-460.684	-231.85	-228.828	-231.85	-228.828		4.63241	4.50012	4.56626	0.132286		63_Benzene-AcOH_1.00	-460.685	-231.849	-228.83	-231.849	-228.83		3.26573	3.22297	3.24435	0.0427515			63_Benzene-AcOH_1.00	-458.719	-230.797	-227.923	-230.797	-227.923		63_Benzene-AcOH_1.00.out:	-458.714	-230.795	-227.921	-230.795
63_Benzene-AcOH_1.05	3.6603	63_Benzene-AcOH_1.05	-460.693	-231.853	-228.833	-231.853	-228.833		4.27186	4.23185	4.25186	0.0400152		-460.684	-231.85	-228.828	-231.85	-228.828		4.31028	4.19297	4.25163	0.117307		63_Benzene-AcOH_1.05	-460.685	-231.849	-228.83	-231.849	-228.83		3.20975	3.17162	3.19068	0.0381247			63_Benzene-AcOH_1.05	-458.72	-230.797	-227.923	-230.797	-227.923		63_Benzene-AcOH_1.05.out:	-458.715	-230.795	-227.921	-230.795
63_Benzene-AcOH_1.10	3.35425	63_Benzene-AcOH_1.10	-460.692	-231.853	-228.833	-231.853	-228.833		3.83293	3.79725	3.81509	0.035678		-460.683	-231.85	-228.828	-231.85	-228.828		3.86585	3.76228	3.81406	0.103575		63_Benzene-AcOH_1.10	-460.684	-231.849	-228.83	-231.849	-228.83		2.97606	2.94212	2.95909	0.0339366			63_Benzene-AcOH_1.10	-458.721	-230.797	-227.923	-230.797	-227.923		63_Benzene-AcOH_1.10.out:	-458.716	-230.795	-227.921	-230.795
63_Benzene-AcOH_1.25	2.26003	63_Benzene-AcOH_1.25	-460.69	-231.853	-228.833	-231.853	-228.833		2.50415	2.47876	2.49146	0.0253938		-460.681	-231.85	-228.828	-231.85	-228.828		2.52465	2.45496	2.4898	0.0696831		63_Benzene-AcOH_1.25	-460.683	-231.849	-228.83	-231.849	-228.83		2.04254	2.01846	2.0305	0.0240785			63_Benzene-AcOH_1.25	-458.722	-230.797	-227.923	-230.797	-227.923		63_Benzene-AcOH_1.25.out:	-458.717	-230.795	-227.921	-230.795
63_Benzene-AcOH_1.50	1.04046	63_Benzene-AcOH_1.50	-460.688	-231.853	-228.833	-231.853	-228.833		1.12841	1.11489	1.12165	0.013515		-460.679	-231.85	-228.828	-231.85	-228.828		1.14131	1.1045	1.1229	0.0368149		63_Benzene-AcOH_1.50	-460.681	-231.849	-228.83	-231.849	-228.83		0.951849	0.939156	0.945502	0.0126928			63_Benzene-AcOH_1.50	-458.722	-230.797	-227.923	-230.797	-227.923		63_Benzene-AcOH_1.50.out:	-458.717	-230.795	-227.921	-230.795
63_Benzene-AcOH_2.00	0.27148	63_Benzene-AcOH_2.00	-460.687	-231.853	-228.833	-231.853	-228.833		0.286091	0.282257	0.284174	0.00383479		-460.678	-231.85	-228.828	-231.85	-228.828		0.294682	0.279873	0.287277	0.0148089		63_Benzene-AcOH_2.00	-460.68	-231.849	-228.83	-231.849	-228.83		0.249712	0.246082	0.247897	0.00363047			63_Benzene-AcOH_2.00	-458.721	-230.797	-227.923	-230.797	-227.923		63_Benzene-AcOH_2.00.out:	-458.716	-230.795	-227.921	-230.795
64_Peptide-Ethene_0.90	2.59879	64_Peptide-Ethene_0.90	-326.638	-248.19	-78.4429	-248.19	-78.4429		2.90674	2.87014	2.88844	0.0366024		-326.631	-248.185	-78.4415	-248.185	-78.4415		2.93485	2.83528	2.88506	0.0995726		64_Peptide-Ethene_0.90	-326.65	-248.194	-78.453	-248.194	-78.453		1.66864	1.63328	1.65096	0.035356			64_Peptide-Ethene_0.90	-325.189	-247.122	-78.0705	-247.122	-78.0705		64_Peptide-Ethene_0.90.out:	-325.185	-247.119	-78.0696	-247.119
64_Peptide-Ethene_0.95	2.95201	64_Peptide-Ethene_0.95	-326.638	-248.19	-78.4429	-248.19	-78.4429		3.18131	3.14794	3.16463	0.033371		-326.632	-248.185	-78.4415	-248.185	-78.4415		3.2047	3.11526	3.15998	0.0894394		64_Peptide-Ethene_0.95	-326.651	-248.194	-78.453	-248.194	-78.453		2.15945	2.12736	2.1434	0.0320936			64_Peptide-Ethene_0.95	-325.191	-247.122	-78.0705	-247.122	-78.0705		64_Peptide-Ethene_0.95.out:	-325.187	-247.119	-78.0696	-247.119
64_Peptide-Ethene_1.00	2.99435	64_Peptide-Ethene_1.00	-326.638	-248.19	-78.4429	-248.19	-78.4429		3.16753	3.1372	3.15236	0.030329		-326.632	-248.185	-78.4415	-248.185	-78.4415		3.18713	3.10684	3.14699	0.0802901		64_Peptide-Ethene_1.00	-326.651	-248.194	-78.453	-248.194	-78.453		2.32187	2.29282	2.30735	0.0290483			64_Peptide-Ethene_1.00	-325.192	-247.122	-78.0705	-247.122	-78.0705		64_Peptide-Ethene_1.00.out:	-325.188	-247.119	-78.0696	-247.119
64_Peptide-Ethene_1.05	2.86193	64_Peptide-Ethene_1.05	-326.638	-248.19	-78.4429	-248.19	-78.4429		2.99476	2.96729	2.98103	0.0274706		-326.631	-248.185	-78.4415	-248.185	-78.4415		3.01147	2.93945	2.97546	0.0720194		64_Peptide-Ethene_1.05	-326.651	-248.194	-78.453	-248.194	-78.453		2.29327	2.26706	2.28017	0.0262104			64_Peptide-Ethene_1.05	-325.193	-247.122	-78.0705	-247.122	-78.0705		64_Peptide-Ethene_1.05.out:	-325.189	-247.119	-78.0696	-247.119
64_Peptide-Ethene_1.10	2.64066	64_Peptide-Ethene_1.10	-326.638	-248.19	-78.4429	-248.19	-78.4429		2.74417	2.71935	2.73176	0.0248213		-326.631	-248.185	-78.4415	-248.185	-78.4415		2.75871	2.69413	2.72642	0.0645806		64_Peptide-Ethene_1.10	-326.651	-248.194	-78.453	-248.194	-78.453		2.1606	2.137	2.1488	0.0236008			64_Peptide-Ethene_1.10	-325.193	-247.122	-78.0705	-247.122	-78.0705		64_Peptide-Ethene_1.10.out:	-325.189	-247.119	-78.0696	-247.119
64_Peptide-Ethene_1.25	1.8687	64_Peptide-Ethene_1.25	-326.636	-248.19	-78.4429	-248.19	-78.4429		1.92115	1.903	1.91207	0.0181434		-326.63	-248.185	-78.4415	-248.185	-78.4415		1.93095	1.88484	1.9079	0.0461118		64_Peptide-Ethene_1.25	-326.65	-248.194	-78.453	-248.194	-78.453		1.57922	1.5621	1.57066	0.0171182			64_Peptide-Ethene_1.25	-325.193	-247.122	-78.0705	-247.122	-78.0705		64_Peptide-Ethene_1.25.out:	-325.19	-247.119	-78.0696	-247.119
64_Peptide-Ethene_1.50	0.8899	64_Peptide-Ethene_1.50	-326.635	-248.19	-78.4429	-248.19	-78.4429		0.907664	0.897759	0.902712	0.00990449		-326.628	-248.185	-78.4415	-248.185	-78.4415		0.912013	0.887739	0.899876	0.0242737		64_Peptide-Ethene_1.50	-326.649	-248.194	-78.453	-248.194	-78.453		0.768824	0.759552	0.764188	0.00927195			64_Peptide-Ethene_1.50	-325.193	-247.122	-78.0705	-247.122	-78.0705		64_Peptide-Ethene_1.50.out:	-325.189	-247.119	-78.0696	-247.119
64_Peptide-Ethene_2.00	0.193792	64_Peptide-Ethene_2.00	-326.633	-248.19	-78.4429	-248.19	-78.4429		0.196712	0.194232	0.195472	0.00248002		-326.627	-248.185	-78.4415	-248.185	-78.4415		0.199884	0.192618	0.196251	0.00726598		64_Peptide-Ethene_2.00	-326.648	-248.194	-78.453	-248.194	-78.453		0.171968	0.169682	0.170825	0.00228633			64_Peptide-Ethene_2.00	-325.193	-247.122	-78.0705	-247.122	-78.0705		64_Peptide-Ethene_2.00.out:	-325.189	-247.119	-78.0696	-247.119
65_Pyridine-Ethyne_0.90	3.70059	65_Pyridine-Ethyne_0.90	-325.099	-247.893	-77.2002	-247.893	-77.2002		3.89141	3.87475	3.88308	0.01666		-325.093	-247.888	-77.1987	-247.888	-77.1987		3.89019	3.83543	3.86281	0.0547623		65_Pyridine-Ethyne_0.90	-325.094	-247.884	-77.2041	-247.884	-77.2041		3.14946	3.13233	3.1409	0.0171307			65_Pyridine-Ethyne_0.90	-323.653	-246.796	-76.8541	-246.796	-76.8541		65_Pyridine-Ethyne_0.90.out:	-323.649	-246.794	-76.8534	-246.794
65_Pyridine-Ethyne_0.95	4.04799	65_Pyridine-Ethyne_0.95	-325.099	-247.893	-77.2002	-247.893	-77.2002		4.18753	4.17256	4.18005	0.0149737		-325.094	-247.888	-77.1987	-247.888	-77.1987		4.18618	4.138	4.16209	0.0481733		65_Pyridine-Ethyne_0.95	-325.094	-247.884	-77.2041	-247.884	-77.2041		3.57263	3.55725	3.56494	0.0153784			65_Pyridine-Ethyne_0.95	-323.654	-246.796	-76.8541	-246.796	-76.8541		65_Pyridine-Ethyne_0.95.out:	-323.65	-246.794	-76.8534	-246.794
65_Pyridine-Ethyne_1.00	4.10364	65_Pyridine-Ethyne_1.00	-325.099	-247.893	-77.2002	-247.893	-77.2002		4.20854	4.19513	4.20183	0.0134108		-325.094	-247.888	-77.1987	-247.888	-77.1987		4.20691	4.16455	4.18573	0.0423598		65_Pyridine-Ethyne_1.00	-325.094	-247.884	-77.2041	-247.884	-77.2041		3.69753	3.68377	3.69065	0.0137601			65_Pyridine-Ethyne_1.00	-323.654	-246.796	-76.8541	-246.796	-76.8541		65_Pyridine-Ethyne_1.00.out:	-323.651	-246.794	-76.8534	-246.794
65_Pyridine-Ethyne_1.05	3.98042	65_Pyridine-Ethyne_1.05	-325.099	-247.893	-77.2002	-247.893	-77.2002		4.06227	4.0503	4.05628	0.011975		-325.093	-247.888	-77.1987	-247.888	-77.1987		4.06035	4.02307	4.04171	0.0372838		65_Pyridine-Ethyne_1.05	-325.094	-247.884	-77.2041	-247.884	-77.2041		3.63641	3.62414	3.63028	0.0122722			65_Pyridine-Ethyne_1.05	-323.654	-246.796	-76.8541	-246.796	-76.8541		65_Pyridine-Ethyne_1.05.out:	-323.651	-246.794	-76.8534	-246.794
65_Pyridine-Ethyne_1.10	3.75493	65_Pyridine-Ethyne_1.10	-325.099	-247.893	-77.2002	-247.893	-77.2002		3.82163	3.81087	3.81625	0.0107597		-325.093	-247.888	-77.1987	-247.888	-77.1987		3.8195	3.78659	3.80304	0.0329154		65_Pyridine-Ethyne_1.10	-325.094	-247.884	-77.2041	-247.884	-77.2041		3.4654	3.45438	3.45989	0.0110166			65_Pyridine-Ethyne_1.10	-323.654	-246.796	-76.8541	-246.796	-76.8541		65_Pyridine-Ethyne_1.10.out:	-323.651	-246.794	-76.8534	-246.794
65_Pyridine-Ethyne_1.25	2.88766	65_Pyridine-Ethyne_1.25	-325.097	-247.893	-77.2002	-247.893	-77.2002		2.93137	2.92396	2.92767	0.00740228		-325.092	-247.888	-77.1987	-247.888	-77.1987		2.9291	2.90627	2.91769	0.0228218		65_Pyridine-Ethyne_1.25	-325.093	-247.884	-77.2041	-247.884	-77.2041		2.71773	2.71018	2.71395	0.00755315			65_Pyridine-Ethyne_1.25	-323.654	-246.796	-76.8541	-246.796	-76.8541		65_Pyridine-Ethyne_1.25.out:	-323.651	-246.794	-76.8533	-246.794
65_Pyridine-Ethyne_1.50	1.69428	65_Pyridine-Ethyne_1.50	-325.095	-247.893	-77.2002	-247.893	-77.2002		1.72418	1.72031	1.72224	0.00387628		-325.09	-247.888	-77.1987	-247.888	-77.1987		1.72249	1.70997	1.71623	0.0125165		65_Pyridine-Ethyne_1.50	-325.091	-247.884	-77.2041	-247.884	-77.2041		1.62499	1.62107	1.62303	0.00391904			65_Pyridine-Ethyne_1.50	-323.652	-246.796	-76.8541	-246.796	-76.8541		65_Pyridine-Ethyne_1.50.out:	-323.649	-246.794	-76.8533	-246.794
65_Pyridine-Ethyne_2.00	0.627307	65_Pyridine-Ethyne_2.00	-325.094	-247.893	-77.2002	-247.893	-77.2002		0.642965	0.641768	0.642366	0.00119709		-325.088	-247.888	-77.1987	-247.888	-77.1987		0.642351	0.637858	0.640105	0.00449284		65_Pyridine-Ethyne_2.00	-325.09	-247.884	-77.2041	-247.884	-77.2041		0.614716	0.61355	0.614133	0.00116558			65_Pyridine-Ethyne_2.00	-323.651	-246.796	-76.8541	-246.796	-76.8541		65_Pyridine-Ethyne_2.00.out:	-323.648	-246.794	-76.8533	-246.794
66_MeNH2-Pyridine_0.90	3.43499	66_MeNH2-Pyridine_0.90	-343.614	-95.715	-247.893	-95.715	-247.892		4.34791	4.31447	4.33119	0.0334376		-343.608	-95.7131	-247.888	-95.713	-247.888		4.38591	4.27342	4.32966	0.112482		66_MeNH2-Pyridine_0.90	-343.613	-95.7245	-247.884	-95.7245	-247.884		2.77974	2.74674	2.76324	0.0329976			66_MeNH2-Pyridine_0.90	-342.054	-95.2628	-246.796	-95.2628	-246.796		66_MeNH2-Pyridine_0.90.out:	-342.051	-95.2617	-246.794	-95.2616
66_MeNH2-Pyridine_0.95	3.87	66_MeNH2-Pyridine_0.95	-343.615	-95.715	-247.893	-95.715	-247.892		4.60235	4.57169	4.58702	0.0306617		-343.609	-95.7131	-247.888	-95.713	-247.888		4.63405	4.53341	4.58373	0.100636		66_MeNH2-Pyridine_0.95	-343.614	-95.7245	-247.884	-95.7245	-247.884		3.29413	3.26395	3.27904	0.0301795			66_MeNH2-Pyridine_0.95	-342.057	-95.2628	-246.796	-95.2628	-246.796		66_MeNH2-Pyridine_0.95.out:	-342.053	-95.2616	-246.794	-95.2616
66_MeNH2-Pyridine_1.00	3.96422	66_MeNH2-Pyridine_1.00	-343.615	-95.715	-247.893	-95.715	-247.892		4.55594	4.52786	4.5419	0.0280836		-343.609	-95.7131	-247.888	-95.713	-247.888		4.58225	4.49223	4.53724	0.0900234		66_MeNH2-Pyridine_1.00	-343.614	-95.7245	-247.884	-95.7245	-247.884		3.4619	3.43433	3.44811	0.0275695			66_MeNH2-Pyridine_1.00	-342.058	-95.2628	-246.796	-95.2628	-246.796		66_MeNH2-Pyridine_1.00.out:	-342.055	-95.2616	-246.794	-95.2616
66_MeNH2-Pyridine_1.05	3.85203	66_MeNH2-Pyridine_1.05	-343.614	-95.715	-247.893	-95.715	-247.892		4.33366	4.30799	4.32083	0.025673		-343.608	-95.7131	-247.888	-95.713	-247.888		4.35556	4.27502	4.31529	0.0805325		66_MeNH2-Pyridine_1.05	-343.614	-95.7245	-247.884	-95.7245	-247.884		3.41687	3.39173	3.4043	0.0251388			66_MeNH2-Pyridine_1.05	-342.059	-95.2628	-246.796	-95.2628	-246.796		66_MeNH2-Pyridine_1.05.out:	-342.056	-95.2616	-246.794	-95.2616
66_MeNH2-Pyridine_1.10	3.62322	66_MeNH2-Pyridine_1.10	-343.614	-95.715	-247.893	-95.715	-247.892		4.01857	3.99515	4.00686	0.0234175		-343.608	-95.7131	-247.888	-95.713	-247.888		4.03694	3.9649	4.00092	0.0720468		66_MeNH2-Pyridine_1.10	-343.614	-95.7245	-247.884	-95.7245	-247.884		3.24835	3.22547	3.23691	0.0228736			66_MeNH2-Pyridine_1.10	-342.06	-95.2628	-246.796	-95.2628	-246.796		66_MeNH2-Pyridine_1.10.out:	-342.056	-95.2616	-246.794	-95.2616
66_MeNH2-Pyridine_1.25	2.72364	66_MeNH2-Pyridine_1.25	-343.612	-95.715	-247.893	-95.715	-247.892		2.95366	2.93618	2.94492	0.017487		-343.606	-95.7131	-247.888	-95.713	-247.888		2.96541	2.91395	2.93968	0.0514602		66_MeNH2-Pyridine_1.25	-343.613	-95.7245	-247.884	-95.7245	-247.884		2.48995	2.473	2.48147	0.0169465			66_MeNH2-Pyridine_1.25	-342.06	-95.2628	-246.796	-95.2628	-246.796		66_MeNH2-Pyridine_1.25.out:	-342.057	-95.2616	-246.794	-95.2616
66_MeNH2-Pyridine_1.50	1.51634	66_MeNH2-Pyridine_1.50	-343.61	-95.715	-247.893	-95.715	-247.892		1.62257	1.61244	1.6175	0.0101333		-343.604	-95.7131	-247.888	-95.713	-247.888		1.63056	1.6004	1.61548	0.0301577		66_MeNH2-Pyridine_1.50	-343.611	-95.7245	-247.884	-95.7245	-247.884		1.41221	1.40252	1.40736	0.00969251			66_MeNH2-Pyridine_1.50	-342.06	-95.2628	-246.796	-95.2628	-246.796		66_MeNH2-Pyridine_1.50.out:	-342.056	-95.2616	-246.794	-95.2616
66_MeNH2-Pyridine_2.00	0.502315	66_MeNH2-Pyridine_2.00	-343.608	-95.715	-247.892	-95.715	-247.892		0.533526	0.530371	0.531949	0.00315576		-343.602	-95.7131	-247.888	-95.713	-247.888		0.537792	0.527006	0.532399	0.0107865		66_MeNH2-Pyridine_2.00	-343.61	-95.7245	-247.884	-95.7245	-247.884		0.480671	0.477706	0.479188	0.00296539			66_MeNH2-Pyridine_2.00	-342.059	-95.2628	-246.796	-95.2628	-246.796		66_MeNH2-Pyridine_2.00.out:	-342.056	-95.2616	-246.794	-95.2616
[truncated: 40 more columns]

## Sheet: CCSD-F12c VTZ-F12
															HF+CABS	MP2-F12	CCSD(F12*)	HLC
01_Water-Water_0.90.out	-152.137	-152.738	-152.731	1.08157		01_Water-Water.out	-76.0659	-76.3654	-76.3619	01_Water-Water.out	-76.066	-76.3655	-76.3619	01_Water-Water_0.90.out	2.91182	4.72237	4.38667	-0.335708
01_Water-Water_0.95.out	-152.138	-152.739	-152.731	1.08161		01_Water-Water.out	-76.0659	-76.3654	-76.3619	01_Water-Water.out	-76.066	-76.3655	-76.3619	01_Water-Water_0.95.out	3.51937	4.99119	4.72787	-0.263315
01_Water-Water_1.00.out	-152.138	-152.739	-152.731	1.08166		01_Water-Water.out	-76.0659	-76.3654	-76.3619	01_Water-Water.out	-76.066	-76.3655	-76.3619	01_Water-Water_1.00.out	3.77974	4.97275	4.76595	-0.206791
01_Water-Water_1.05.out	-152.138	-152.738	-152.731	1.08171		01_Water-Water.out	-76.0659	-76.3654	-76.3619	01_Water-Water.out	-76.066	-76.3655	-76.3619	01_Water-Water_1.05.out	3.81923	4.78301	4.62018	-0.162832
01_Water-Water_1.10.out	-152.138	-152.738	-152.731	1.08176		01_Water-Water.out	-76.0659	-76.3654	-76.3619	01_Water-Water.out	-76.066	-76.3655	-76.3619	01_Water-Water_1.10.out	3.72237	4.49887	4.36999	-0.128886
01_Water-Water_1.25.out	-152.137	-152.736	-152.729	1.08186		01_Water-Water.out	-76.0659	-76.3654	-76.3619	01_Water-Water.out	-76.066	-76.3655	-76.3619	01_Water-Water_1.25.out	3.09292	3.49093	3.42435	-0.0665831
01_Water-Water_1.50.out	-152.135	-152.734	-152.727	1.08193		01_Water-Water.out	-76.0659	-76.3654	-76.3619	01_Water-Water.out	-76.066	-76.3655	-76.3619	01_Water-Water_1.50.out	2.02448	2.13895	2.11368	-0.0252609
01_Water-Water_2.00.out	-152.133	-152.732	-152.725	1.08197		01_Water-Water.out	-76.0659	-76.3654	-76.3619	01_Water-Water.out	-76.066	-76.3655	-76.3619	01_Water-Water_2.00.out	0.906023	0.891661	0.886225	-0.00543635
02_Water-MeOH_0.90.out	-191.17	-191.958	-191.957	1.07673		02_Water-MeOH.out	-76.0658	-76.3654	-76.3619	02_Water-MeOH.out	-115.1	-115.584	-115.587	02_Water-MeOH_0.90.out	2.78036	5.43665	4.91207	-0.524572
02_Water-MeOH_0.95.out	-191.171	-191.958	-191.958	1.07677		02_Water-MeOH.out	-76.0658	-76.3654	-76.3619	02_Water-MeOH.out	-115.1	-115.584	-115.587	02_Water-MeOH_0.95.out	3.51204	5.73109	5.30528	-0.425811
02_Water-MeOH_1.00.out	-191.172	-191.958	-191.958	1.07682		02_Water-MeOH.out	-76.0658	-76.3654	-76.3619	02_Water-MeOH.out	-115.1	-115.584	-115.587	02_Water-MeOH_1.00.out	3.85417	5.70458	5.35859	-0.345991
02_Water-MeOH_1.05.out	-191.172	-191.958	-191.957	1.07687		02_Water-MeOH.out	-76.0658	-76.3654	-76.3619	02_Water-MeOH.out	-115.1	-115.584	-115.587	02_Water-MeOH_1.05.out	3.94432	5.48455	5.20293	-0.281613
02_Water-MeOH_1.10.out	-191.172	-191.957	-191.957	1.07692		02_Water-MeOH.out	-76.0658	-76.3654	-76.3619	02_Water-MeOH.out	-115.1	-115.584	-115.587	02_Water-MeOH_1.10.out	3.87577	5.15694	4.92667	-0.230278
02_Water-MeOH_1.25.out	-191.171	-191.955	-191.955	1.07703		02_Water-MeOH.out	-76.0658	-76.3654	-76.3619	02_Water-MeOH.out	-115.1	-115.584	-115.587	02_Water-MeOH_1.25.out	3.25658	3.99205	3.86162	-0.130427
02_Water-MeOH_1.50.out	-191.169	-191.953	-191.953	1.07712		02_Water-MeOH.out	-76.0658	-76.3654	-76.3619	02_Water-MeOH.out	-115.1	-115.584	-115.587	02_Water-MeOH_1.50.out	2.13018	2.41942	2.36236	-0.0570672
02_Water-MeOH_2.00.out	-191.167	-191.951	-191.951	1.07718		02_Water-MeOH.out	-76.0658	-76.3654	-76.3619	02_Water-MeOH.out	-115.1	-115.584	-115.587	02_Water-MeOH_2.00.out	0.934027	0.97274	0.957258	-0.015482
03_Water-MeNH2_0.90.out	-171.333	-172.089	-172.094	1.07214		03_Water-MeNH2.out	-76.0655	-76.3653	-76.3617	03_Water-MeNH2.out	-95.2618	-95.7131	-95.723	03_Water-MeNH2_0.90.out	3.58168	6.83247	6.10161	-0.730859
03_Water-MeNH2_0.95.out	-171.334	-172.09	-172.095	1.07217		03_Water-MeNH2.out	-76.0655	-76.3653	-76.3617	03_Water-MeNH2.out	-95.2618	-95.7131	-95.723	03_Water-MeNH2_0.95.out	4.3975	7.12581	6.52412	-0.601686
03_Water-MeNH2_1.00.out	-171.335	-172.09	-172.095	1.0722		03_Water-MeNH2.out	-76.0655	-76.3653	-76.3617	03_Water-MeNH2.out	-95.2618	-95.7131	-95.723	03_Water-MeNH2_1.00.out	4.78055	7.06726	6.57183	-0.495433
03_Water-MeNH2_1.05.out	-171.335	-172.089	-172.095	1.07223		03_Water-MeNH2.out	-76.0655	-76.3653	-76.3617	03_Water-MeNH2.out	-95.2618	-95.7131	-95.723	03_Water-MeNH2_1.05.out	4.87784	6.79222	6.3838	-0.408427
03_Water-MeNH2_1.10.out	-171.335	-172.089	-172.094	1.07227		03_Water-MeNH2.out	-76.0655	-76.3653	-76.3617	03_Water-MeNH2.out	-95.2618	-95.7131	-95.723	03_Water-MeNH2_1.10.out	4.79105	6.39359	6.05583	-0.337763
03_Water-MeNH2_1.25.out	-171.334	-172.086	-172.092	1.07236		03_Water-MeNH2.out	-76.0655	-76.3653	-76.3617	03_Water-MeNH2.out	-95.2618	-95.7131	-95.723	03_Water-MeNH2_1.25.out	4.03158	4.97384	4.77723	-0.196612
03_Water-MeNH2_1.50.out	-171.331	-172.083	-172.089	1.07245		03_Water-MeNH2.out	-76.0655	-76.3653	-76.3617	03_Water-MeNH2.out	-95.2618	-95.7131	-95.723	03_Water-MeNH2_1.50.out	2.61662	3.01339	2.9229	-0.0904993
03_Water-MeNH2_2.00.out	-171.329	-172.08	-172.087	1.07252		03_Water-MeNH2.out	-76.0655	-76.3653	-76.3617	03_Water-MeNH2.out	-95.2618	-95.7131	-95.723	03_Water-MeNH2_2.00.out	1.09177	1.16889	1.14034	-0.0285494
04_Water-Peptide_0.90.out	-323.192	-324.563	-324.557	1.07138		04_Water-Peptide.out	-76.0656	-76.3653	-76.3618	04_Water-Peptide.out	-247.119	-248.185	-248.184	04_Water-Peptide_0.90.out	4.74918	7.75273	7.28824	-0.464496
04_Water-Peptide_0.95.out	-323.193	-324.564	-324.558	1.0714		04_Water-Peptide.out	-76.0656	-76.3653	-76.3618	04_Water-Peptide.out	-247.119	-248.185	-248.184	04_Water-Peptide_0.95.out	5.56596	8.11867	7.74394	-0.374726
04_Water-Peptide_1.00.out	-323.194	-324.564	-324.558	1.07142		04_Water-Peptide.out	-76.0656	-76.3653	-76.3618	04_Water-Peptide.out	-247.119	-248.185	-248.184	04_Water-Peptide_1.00.out	5.93748	8.0995	7.79932	-0.300184
04_Water-Peptide_1.05.out	-323.194	-324.563	-324.557	1.07145		04_Water-Peptide.out	-76.0656	-76.3653	-76.3618	04_Water-Peptide.out	-247.119	-248.185	-248.184	04_Water-Peptide_1.05.out	6.01527	7.84006	7.60111	-0.238943
04_Water-Peptide_1.10.out	-323.194	-324.562	-324.557	1.07148		04_Water-Peptide.out	-76.0656	-76.3653	-76.3618	04_Water-Peptide.out	-247.119	-248.185	-248.184	04_Water-Peptide_1.10.out	5.90388	7.44007	7.25076	-0.189316
04_Water-Peptide_1.25.out	-323.192	-324.56	-324.555	1.07155		04_Water-Peptide.out	-76.0656	-76.3653	-76.3618	04_Water-Peptide.out	-247.119	-248.185	-248.184	04_Water-Peptide_1.25.out	5.05282	5.95349	5.86216	-0.091329
04_Water-Peptide_1.50.out	-323.19	-324.557	-324.551	1.07161		04_Water-Peptide.out	-76.0656	-76.3653	-76.3618	04_Water-Peptide.out	-247.119	-248.185	-248.184	04_Water-Peptide_1.50.out	3.46047	3.80207	3.78113	-0.0209392
04_Water-Peptide_2.00.out	-323.187	-324.553	-324.548	1.07165		04_Water-Peptide.out	-76.0656	-76.3653	-76.3618	04_Water-Peptide.out	-247.119	-248.185	-248.184	04_Water-Peptide_2.00.out	1.44289	1.43019	1.442	0.0118163
05_MeOH-MeOH_0.90.out	-230.204	-231.176	-231.182	1.07387		05_MeOH-MeOH.out	-115.1	-115.584	-115.587	05_MeOH-MeOH.out	-115.1	-115.584	-115.587	05_MeOH-MeOH_0.90.out	2.39609	5.51198	4.89302	-0.61896
05_MeOH-MeOH_0.95.out	-230.205	-231.177	-231.183	1.07392		05_MeOH-MeOH.out	-115.1	-115.584	-115.587	05_MeOH-MeOH.out	-115.1	-115.584	-115.587	05_MeOH-MeOH_0.95.out	3.23394	5.85546	5.35141	-0.504051
05_MeOH-MeOH_1.00.out	-230.206	-231.177	-231.183	1.07397		05_MeOH-MeOH.out	-115.1	-115.584	-115.587	05_MeOH-MeOH.out	-115.1	-115.584	-115.587	05_MeOH-MeOH_1.00.out	3.65765	5.86048	5.44963	-0.41085
05_MeOH-MeOH_1.05.out	-230.206	-231.176	-231.183	1.07402		05_MeOH-MeOH.out	-115.1	-115.584	-115.587	05_MeOH-MeOH.out	-115.1	-115.584	-115.587	05_MeOH-MeOH_1.05.out	3.80999	5.65902	5.32337	-0.335657
05_MeOH-MeOH_1.10.out	-230.206	-231.176	-231.182	1.07406		05_MeOH-MeOH.out	-115.1	-115.584	-115.587	05_MeOH-MeOH.out	-115.1	-115.584	-115.587	05_MeOH-MeOH_1.10.out	3.78814	5.34019	5.0647	-0.275488
05_MeOH-MeOH_1.25.out	-230.205	-231.174	-231.181	1.07418		05_MeOH-MeOH.out	-115.1	-115.584	-115.587	05_MeOH-MeOH.out	-115.1	-115.584	-115.587	05_MeOH-MeOH_1.25.out	3.24722	4.16714	4.00914	-0.158003
05_MeOH-MeOH_1.50.out	-230.203	-231.171	-231.178	1.07427		05_MeOH-MeOH.out	-115.1	-115.584	-115.587	05_MeOH-MeOH.out	-115.1	-115.584	-115.587	05_MeOH-MeOH_1.50.out	2.15412	2.54476	2.47336	-0.0714035
05_MeOH-MeOH_2.00.out	-230.201	-231.169	-231.176	1.07433		05_MeOH-MeOH.out	-115.1	-115.584	-115.587	05_MeOH-MeOH.out	-115.1	-115.584	-115.587	05_MeOH-MeOH_2.00.out	0.952711	1.02604	1.00484	-0.0212069
06_MeOH-MeNH2_0.90.out	-210.365	-211.308	-211.32	1.07004		06_MeOH-MeNH2.out	-115.099	-115.583	-115.587	06_MeOH-MeNH2.out	-95.2618	-95.7131	-95.723	06_MeOH-MeNH2_0.90.out	2.70579	7.34466	6.33872	-1.00594
06_MeOH-MeNH2_0.95.out	-210.367	-211.309	-211.321	1.07009		06_MeOH-MeNH2.out	-115.099	-115.583	-115.587	06_MeOH-MeNH2.out	-95.2618	-95.7131	-95.723	06_MeOH-MeNH2_0.95.out	3.81716	7.74381	6.90984	-0.833969
06_MeOH-MeNH2_1.00.out	-210.368	-211.309	-211.321	1.07013		06_MeOH-MeNH2.out	-115.099	-115.583	-115.587	06_MeOH-MeNH2.out	-95.2618	-95.7131	-95.723	06_MeOH-MeNH2_1.00.out	4.41469	7.7356	7.04453	-0.69107
06_MeOH-MeNH2_1.05.out	-210.368	-211.308	-211.321	1.07017		06_MeOH-MeNH2.out	-115.099	-115.583	-115.587	06_MeOH-MeNH2.out	-95.2618	-95.7131	-95.723	06_MeOH-MeNH2_1.05.out	4.66665	7.47323	6.90033	-0.5729
06_MeOH-MeNH2_1.10.out	-210.369	-211.308	-211.32	1.07021		06_MeOH-MeNH2.out	-115.099	-115.583	-115.587	06_MeOH-MeNH2.out	-95.2618	-95.7131	-95.723	06_MeOH-MeNH2_1.10.out	4.68964	7.06226	6.58622	-0.476034
06_MeOH-MeNH2_1.25.out	-210.368	-211.305	-211.318	1.07032		06_MeOH-MeNH2.out	-115.099	-115.583	-115.587	06_MeOH-MeNH2.out	-95.2618	-95.7131	-95.723	06_MeOH-MeNH2_1.25.out	4.09435	5.53416	5.25461	-0.279545
06_MeOH-MeNH2_1.50.out	-210.365	-211.302	-211.315	1.07044		06_MeOH-MeNH2.out	-115.099	-115.583	-115.587	06_MeOH-MeNH2.out	-95.2618	-95.7131	-95.723	06_MeOH-MeNH2_1.50.out	2.7211	3.3653	3.23647	-0.128836
06_MeOH-MeNH2_2.00.out	-210.363	-211.299	-211.312	1.07053		06_MeOH-MeNH2.out	-115.099	-115.583	-115.587	06_MeOH-MeNH2.out	-95.2618	-95.7131	-95.723	06_MeOH-MeNH2_2.00.out	1.14848	1.29669	1.25635	-0.040343
07_MeOH-Peptide_0.90.out	-362.225	-363.781	-363.782	1.07018		07_MeOH-Peptide.out	-115.099	-115.583	-115.587	07_MeOH-Peptide.out	-247.119	-248.185	-248.184	07_MeOH-Peptide_0.90.out	3.87523	7.75147	7.09592	-0.655544
07_MeOH-Peptide_0.95.out	-362.226	-363.782	-363.783	1.07021		07_MeOH-Peptide.out	-115.099	-115.583	-115.587	07_MeOH-Peptide.out	-247.119	-248.185	-248.184	07_MeOH-Peptide_0.95.out	4.85535	8.19943	7.65691	-0.542524
07_MeOH-Peptide_1.00.out	-362.227	-363.782	-363.783	1.07024		07_MeOH-Peptide.out	-115.099	-115.583	-115.587	07_MeOH-Peptide.out	-247.119	-248.185	-248.184	07_MeOH-Peptide_1.00.out	5.35333	8.23343	7.78556	-0.447875
07_MeOH-Peptide_1.05.out	-362.227	-363.782	-363.783	1.07028		07_MeOH-Peptide.out	-115.099	-115.583	-115.587	07_MeOH-Peptide.out	-247.119	-248.185	-248.184	07_MeOH-Peptide_1.05.out	5.52865	8.00546	7.63616	-0.369307
07_MeOH-Peptide_1.10.out	-362.227	-363.781	-363.782	1.07031		07_MeOH-Peptide.out	-115.099	-115.583	-115.587	07_MeOH-Peptide.out	-247.119	-248.185	-248.184	07_MeOH-Peptide_1.10.out	5.49169	7.62052	7.31568	-0.304843
07_MeOH-Peptide_1.25.out	-362.226	-363.779	-363.78	1.07039		07_MeOH-Peptide.out	-115.099	-115.583	-115.587	07_MeOH-Peptide.out	-247.119	-248.185	-248.184	07_MeOH-Peptide_1.25.out	4.77296	6.12223	5.94807	-0.174166
07_MeOH-Peptide_1.50.out	-362.223	-363.775	-363.776	1.07047		07_MeOH-Peptide.out	-115.099	-115.583	-115.587	07_MeOH-Peptide.out	-247.119	-248.185	-248.184	07_MeOH-Peptide_1.50.out	3.05126	3.60849	3.54411	-0.0643795
07_MeOH-Peptide_2.00.out	-362.22	-363.77	-363.772	1.07053		07_MeOH-Peptide.out	-115.099	-115.583	-115.587	07_MeOH-Peptide.out	-247.119	-248.185	-248.184	07_MeOH-Peptide_2.00.out	1.03541	1.09196	1.08477	-0.00718801
08_MeOH-Water_0.90.out	-191.17	-191.957	-191.956	1.07683		08_MeOH-Water.out	-115.1	-115.584	-115.587	08_MeOH-Water.out	-76.0661	-76.3655	-76.3619	08_MeOH-Water_0.90.out	2.55674	4.73551	4.32198	-0.413527
08_MeOH-Water_0.95.out	-191.171	-191.957	-191.957	1.07687		08_MeOH-Water.out	-115.1	-115.584	-115.587	08_MeOH-Water.out	-76.0661	-76.3655	-76.3619	08_MeOH-Water_0.95.out	3.26348	5.05186	4.7258	-0.326065
08_MeOH-Water_1.00.out	-191.172	-191.957	-191.957	1.07692		08_MeOH-Water.out	-115.1	-115.584	-115.587	08_MeOH-Water.out	-76.0661	-76.3655	-76.3619	08_MeOH-Water_1.00.out	3.5992	5.06448	4.80704	-0.25744
08_MeOH-Water_1.05.out	-191.172	-191.957	-191.957	1.07696		08_MeOH-Water.out	-115.1	-115.584	-115.587	08_MeOH-Water.out	-76.0661	-76.3655	-76.3619	08_MeOH-Water_1.05.out	3.69524	4.89351	4.68966	-0.203858
08_MeOH-Water_1.10.out	-191.172	-191.956	-191.956	1.07701		08_MeOH-Water.out	-115.1	-115.584	-115.587	08_MeOH-Water.out	-76.0661	-76.3655	-76.3619	08_MeOH-Water_1.10.out	3.6403	4.61923	4.4569	-0.162337
08_MeOH-Water_1.25.out	-191.171	-191.955	-191.955	1.07711		08_MeOH-Water.out	-115.1	-115.584	-115.587	08_MeOH-Water.out	-76.0661	-76.3655	-76.3619	08_MeOH-Water_1.25.out	3.07995	3.61027	3.52454	-0.0857279
08_MeOH-Water_1.50.out	-191.169	-191.953	-191.953	1.07718		08_MeOH-Water.out	-115.1	-115.584	-115.587	08_MeOH-Water.out	-76.0661	-76.3655	-76.3619	08_MeOH-Water_1.50.out	2.04067	2.22443	2.18969	-0.0347344
08_MeOH-Water_2.00.out	-191.167	-191.951	-191.951	1.07723		08_MeOH-Water.out	-115.1	-115.584	-115.587	08_MeOH-Water.out	-76.0661	-76.3655	-76.3619	08_MeOH-Water_2.00.out	0.919505	0.927398	0.918144	-0.00925428
09_MeNH2-MeOH_0.90.out	-210.362	-211.301	-211.314	1.07016		09_MeNH2-MeOH.out	-95.2617	-95.7131	-95.723	09_MeNH2-MeOH.out	-115.1	-115.584	-115.587	09_MeNH2-MeOH_0.90.out	0.0111494	2.88979	2.41405	-0.475744
09_MeNH2-MeOH_0.95.out	-210.363	-211.302	-211.315	1.07023		09_MeNH2-MeOH.out	-95.2617	-95.7131	-95.723	09_MeNH2-MeOH.out	-115.1	-115.584	-115.587	09_MeNH2-MeOH_0.95.out	0.724679	3.08226	2.70461	-0.377644
09_MeNH2-MeOH_1.00.out	-210.364	-211.302	-211.315	1.07029		09_MeNH2-MeOH.out	-95.2617	-95.7131	-95.723	09_MeNH2-MeOH.out	-115.1	-115.584	-115.587	09_MeNH2-MeOH_1.00.out	1.11972	3.05551	2.75331	-0.302192
09_MeNH2-MeOH_1.05.out	-210.364	-211.301	-211.314	1.07034		09_MeNH2-MeOH.out	-95.2617	-95.7131	-95.723	09_MeNH2-MeOH.out	-115.1	-115.584	-115.587	09_MeNH2-MeOH_1.05.out	1.31153	2.90468	2.6608	-0.243875
09_MeNH2-MeOH_1.10.out	-210.364	-211.301	-211.314	1.07038		09_MeNH2-MeOH.out	-95.2617	-95.7131	-95.723	09_MeNH2-MeOH.out	-115.1	-115.584	-115.587	09_MeNH2-MeOH_1.10.out	1.37579	2.69086	2.49216	-0.198701
09_MeNH2-MeOH_1.25.out	-210.364	-211.3	-211.313	1.07047		09_MeNH2-MeOH.out	-95.2617	-95.7131	-95.723	09_MeNH2-MeOH.out	-115.1	-115.584	-115.587	09_MeNH2-MeOH_1.25.out	1.22675	1.97892	1.86549	-0.113423
09_MeNH2-MeOH_1.50.out	-210.363	-211.299	-211.312	1.07054		09_MeNH2-MeOH.out	-95.2617	-95.7131	-95.723	09_MeNH2-MeOH.out	-115.1	-115.584	-115.587	09_MeNH2-MeOH_1.50.out	0.7948	1.10938	1.05748	-0.051899
09_MeNH2-MeOH_2.00.out	-210.362	-211.297	-211.311	1.0706		09_MeNH2-MeOH.out	-95.2617	-95.7131	-95.723	09_MeNH2-MeOH.out	-115.1	-115.584	-115.587	09_MeNH2-MeOH_2.00.out	0.333541	0.40286	0.387612	-0.015248
10_MeNH2-MeNH2_0.90.out	-190.522	-191.433	-191.451	1.06605		10_MeNH2-MeNH2.out	-95.2616	-95.7131	-95.723	10_MeNH2-MeNH2.out	-95.2617	-95.7131	-95.723	10_MeNH2-MeNH2_0.90.out	-0.729519	3.98732	3.06136	-0.925963
10_MeNH2-MeNH2_0.95.out	-190.524	-191.433	-191.452	1.06613		10_MeNH2-MeNH2.out	-95.2616	-95.7131	-95.723	10_MeNH2-MeNH2.out	-95.2617	-95.7131	-95.723	10_MeNH2-MeNH2_0.95.out	0.409935	4.29961	3.55372	-0.745888
10_MeNH2-MeNH2_1.00.out	-190.525	-191.433	-191.452	1.06621		10_MeNH2-MeNH2.out	-95.2616	-95.7131	-95.723	10_MeNH2-MeNH2.out	-95.2617	-95.7131	-95.723	10_MeNH2-MeNH2_1.00.out	1.08512	4.29816	3.69451	-0.603654
10_MeNH2-MeNH2_1.05.out	-190.526	-191.433	-191.452	1.06628		10_MeNH2-MeNH2.out	-95.2616	-95.7131	-95.723	10_MeNH2-MeNH2.out	-95.2617	-95.7131	-95.723	10_MeNH2-MeNH2_1.05.out	1.45398	4.1123	3.62128	-0.491019
10_MeNH2-MeNH2_1.10.out	-190.526	-191.432	-191.451	1.06634		10_MeNH2-MeNH2.out	-95.2616	-95.7131	-95.723	10_MeNH2-MeNH2.out	-95.2617	-95.7131	-95.723	10_MeNH2-MeNH2_1.10.out	1.62277	3.82739	3.42546	-0.401925
10_MeNH2-MeNH2_1.25.out	-190.526	-191.431	-191.45	1.06646		10_MeNH2-MeNH2.out	-95.2616	-95.7131	-95.723	10_MeNH2-MeNH2.out	-95.2617	-95.7131	-95.723	10_MeNH2-MeNH2_1.25.out	1.55118	2.82808	2.59861	-0.229464
10_MeNH2-MeNH2_1.50.out	-190.525	-191.428	-191.448	1.06658		10_MeNH2-MeNH2.out	-95.2616	-95.7131	-95.723	10_MeNH2-MeNH2.out	-95.2617	-95.7131	-95.723	10_MeNH2-MeNH2_1.50.out	0.888656	1.32925	1.24395	-0.085299
10_MeNH2-MeNH2_2.00.out	-190.524	-191.427	-191.447	1.06665		10_MeNH2-MeNH2.out	-95.2616	-95.7131	-95.723	10_MeNH2-MeNH2.out	-95.2617	-95.7131	-95.723	10_MeNH2-MeNH2_2.00.out	0.31119	0.400725	0.378574	-0.0221507
11_MeNH2-Peptide_0.90.out	-342.381	-343.907	-343.913	1.0677		11_MeNH2-Peptide.out	-95.2616	-95.7131	-95.723	11_MeNH2-Peptide.out	-247.119	-248.185	-248.184	11_MeNH2-Peptide_0.90.out	-0.207011	5.23479	4.16846	-1.06632
11_MeNH2-Peptide_0.95.out	-342.382	-343.907	-343.914	1.06776		11_MeNH2-Peptide.out	-95.2616	-95.7131	-95.723	11_MeNH2-Peptide.out	-247.119	-248.185	-248.184	11_MeNH2-Peptide_0.95.out	0.988864	5.56435	4.68755	-0.876799
11_MeNH2-Peptide_1.00.out	-342.384	-343.907	-343.914	1.06782		11_MeNH2-Peptide.out	-95.2616	-95.7131	-95.723	11_MeNH2-Peptide.out	-247.119	-248.185	-248.184	11_MeNH2-Peptide_1.00.out	1.70532	5.55765	4.83427	-0.723373
11_MeNH2-Peptide_1.05.out	-342.384	-343.907	-343.914	1.06787		11_MeNH2-Peptide.out	-95.2616	-95.7131	-95.723	11_MeNH2-Peptide.out	-247.119	-248.185	-248.184	11_MeNH2-Peptide_1.05.out	2.10007	5.34668	4.74803	-0.598648
11_MeNH2-Peptide_1.10.out	-342.385	-343.907	-343.914	1.06791		11_MeNH2-Peptide.out	-95.2616	-95.7131	-95.723	11_MeNH2-Peptide.out	-247.119	-248.185	-248.184	11_MeNH2-Peptide_1.10.out	2.28048	5.02053	4.52329	-0.49724
11_MeNH2-Peptide_1.25.out	-342.384	-343.904	-343.912	1.06802		11_MeNH2-Peptide.out	-95.2616	-95.7131	-95.723	11_MeNH2-Peptide.out	-247.119	-248.185	-248.184	11_MeNH2-Peptide_1.25.out	1.96585	3.23323	3.01361	-0.219619
11_MeNH2-Peptide_1.50.out	-342.383	-343.901	-343.909	1.06812		11_MeNH2-Peptide.out	-95.2616	-95.7131	-95.723	11_MeNH2-Peptide.out	-247.119	-248.185	-248.184	11_MeNH2-Peptide_1.50.out	1.03382	1.40917	1.34449	-0.0646867
11_MeNH2-Peptide_2.00.out	-342.382	-343.899	-343.907	1.06816		11_MeNH2-Peptide.out	-95.2616	-95.7131	-95.723	11_MeNH2-Peptide.out	-247.119	-248.185	-248.184	11_MeNH2-Peptide_2.00.out	0.403161	0.460889	0.450904	-0.00998515
12_MeNH2-Water_0.90.out	-171.332	-172.09	-172.095	1.07205		12_MeNH2-Water.out	-95.2618	-95.7131	-95.723	12_MeNH2-Water.out	-76.0655	-76.3653	-76.3617	12_MeNH2-Water_0.90.out	3.22315	7.20193	6.2929	-0.90903
12_MeNH2-Water_0.95.out	-171.334	-172.09	-172.096	1.07209		12_MeNH2-Water.out	-95.2618	-95.7131	-95.723	12_MeNH2-Water.out	-76.0655	-76.3653	-76.3617	12_MeNH2-Water_0.95.out	4.1983	7.55662	6.80227	-0.754344
12_MeNH2-Water_1.00.out	-171.335	-172.09	-172.096	1.07213		12_MeNH2-Water.out	-95.2618	-95.7131	-95.723	12_MeNH2-Water.out	-76.0655	-76.3653	-76.3617	12_MeNH2-Water_1.00.out	4.68989	7.52057	6.89472	-0.62584
12_MeNH2-Water_1.05.out	-171.335	-172.09	-172.095	1.07217		12_MeNH2-Water.out	-95.2618	-95.7131	-95.723	12_MeNH2-Water.out	-76.0655	-76.3653	-76.3617	12_MeNH2-Water_1.05.out	4.85958	7.24262	6.72304	-0.519572
12_MeNH2-Water_1.10.out	-171.335	-172.089	-172.095	1.07221		12_MeNH2-Water.out	-95.2618	-95.7131	-95.723	12_MeNH2-Water.out	-76.0655	-76.3653	-76.3617	12_MeNH2-Water_1.10.out	4.81939	6.82526	6.39284	-0.43242
12_MeNH2-Water_1.25.out	-171.334	-172.087	-172.093	1.07232		12_MeNH2-Water.out	-95.2618	-95.7131	-95.723	12_MeNH2-Water.out	-76.0655	-76.3653	-76.3617	12_MeNH2-Water_1.25.out	4.11285	5.31156	5.0564	-0.255161
12_MeNH2-Water_1.50.out	-171.332	-172.084	-172.09	1.07243		12_MeNH2-Water.out	-95.2618	-95.7131	-95.723	12_MeNH2-Water.out	-76.0655	-76.3653	-76.3617	12_MeNH2-Water_1.50.out	2.68514	3.20471	3.08682	-0.117885
12_MeNH2-Water_2.00.out	-171.329	-172.08	-172.087	1.07251		12_MeNH2-Water.out	-95.2618	-95.7131	-95.723	12_MeNH2-Water.out	-76.0655	-76.3653	-76.3617	12_MeNH2-Water_2.00.out	1.11675	1.22773	1.19129	-0.0364448
13_Peptide-MeOH_0.90.out	-362.222	-363.779	-363.779	1.07012		13_Peptide-MeOH.out	-247.119	-248.185	-248.184	13_Peptide-MeOH.out	-115.1	-115.584	-115.587	13_Peptide-MeOH_0.90.out	1.6587	5.98151	5.11767	-0.86384
13_Peptide-MeOH_0.95.out	-362.224	-363.779	-363.78	1.07017		13_Peptide-MeOH.out	-247.119	-248.185	-248.184	13_Peptide-MeOH.out	-115.1	-115.584	-115.587	13_Peptide-MeOH_0.95.out	2.69451	6.33303	5.62729	-0.705742
13_Peptide-MeOH_1.00.out	-362.225	-363.779	-363.78	1.07022		13_Peptide-MeOH.out	-247.119	-248.185	-248.184	13_Peptide-MeOH.out	-115.1	-115.584	-115.587	13_Peptide-MeOH_1.00.out	3.2806	6.34586	5.76669	-0.579175
13_Peptide-MeOH_1.05.out	-362.225	-363.779	-363.78	1.07027		13_Peptide-MeOH.out	-247.119	-248.185	-248.184	13_Peptide-MeOH.out	-115.1	-115.584	-115.587	13_Peptide-MeOH_1.05.out	3.56629	6.15026	5.67268	-0.477576
13_Peptide-MeOH_1.10.out	-362.225	-363.778	-363.78	1.07031		13_Peptide-MeOH.out	-247.119	-248.185	-248.184	13_Peptide-MeOH.out	-115.1	-115.584	-115.587	13_Peptide-MeOH_1.10.out	3.65338	5.83444	5.43834	-0.396107
13_Peptide-MeOH_1.25.out	-362.225	-363.777	-363.778	1.0704		13_Peptide-MeOH.out	-247.119	-248.185	-248.184	13_Peptide-MeOH.out	-115.1	-115.584	-115.587	13_Peptide-MeOH_1.25.out	3.33284	4.65363	4.41969	-0.233946
13_Peptide-MeOH_1.50.out	-362.223	-363.774	-363.776	1.07048		13_Peptide-MeOH.out	-247.119	-248.185	-248.184	13_Peptide-MeOH.out	-115.1	-115.584	-115.587	13_Peptide-MeOH_1.50.out	2.39514	2.97746	2.87039	-0.107071
13_Peptide-MeOH_2.00.out	-362.221	-363.771	-363.773	1.07054		13_Peptide-MeOH.out	-247.119	-248.185	-248.184	13_Peptide-MeOH.out	-115.1	-115.584	-115.587	13_Peptide-MeOH_2.00.out	1.2127	1.32312	1.29712	-0.0260033
14_Peptide-MeNH2_0.90.out	-342.383	-343.91	-343.916	1.06767		14_Peptide-MeNH2.out	-247.119	-248.185	-248.184	14_Peptide-MeNH2.out	-95.2617	-95.7131	-95.723	14_Peptide-MeNH2_0.90.out	1.55723	7.29285	6.03477	-1.25808
14_Peptide-MeNH2_0.95.out	-342.385	-343.911	-343.917	1.06772		14_Peptide-MeNH2.out	-247.119	-248.185	-248.184	14_Peptide-MeNH2.out	-95.2617	-95.7131	-95.723	14_Peptide-MeNH2_0.95.out	2.83416	7.69932	6.65892	-1.0404
14_Peptide-MeNH2_1.00.out	-342.386	-343.911	-343.917	1.06777		14_Peptide-MeNH2.out	-247.119	-248.185	-248.184	14_Peptide-MeNH2.out	-95.2617	-95.7131	-95.723	14_Peptide-MeNH2_1.00.out	3.58703	7.71555	6.85351	-0.862036
14_Peptide-MeNH2_1.05.out	-342.387	-343.91	-343.917	1.06781		14_Peptide-MeNH2.out	-247.119	-248.185	-248.184	14_Peptide-MeNH2.out	-95.2617	-95.7131	-95.723	14_Peptide-MeNH2_1.05.out	3.98093	7.48532	6.76958	-0.715734
14_Peptide-MeNH2_1.10.out	-342.387	-343.91	-343.917	1.06785		14_Peptide-MeNH2.out	-247.119	-248.185	-248.184	14_Peptide-MeNH2.out	-95.2617	-95.7131	-95.723	14_Peptide-MeNH2_1.10.out	4.13092	7.10894	6.5123	-0.596643
14_Peptide-MeNH2_1.25.out	-342.387	-343.907	-343.915	1.06795		14_Peptide-MeNH2.out	-247.119	-248.185	-248.184	14_Peptide-MeNH2.out	-95.2617	-95.7131	-95.723	14_Peptide-MeNH2_1.25.out	3.83199	5.67297	5.31785	-0.355122
14_Peptide-MeNH2_1.50.out	-342.385	-343.904	-343.912	1.06804		14_Peptide-MeNH2.out	-247.119	-248.185	-248.184	14_Peptide-MeNH2.out	-95.2617	-95.7131	-95.723	14_Peptide-MeNH2_1.50.out	2.73671	3.58573	3.42037	-0.165364
14_Peptide-MeNH2_2.00.out	-342.383	-343.901	-343.909	1.06812		14_Peptide-MeNH2.out	-247.119	-248.185	-248.184	14_Peptide-MeNH2.out	-95.2617	-95.7131	-95.723	14_Peptide-MeNH2_2.00.out	1.31899	1.51727	1.46991	-0.0473627
15_Peptide-Peptide_0.90.out	-494.242	-496.384	-496.378	1.06844		15_Peptide-Peptide.out	-247.118	-248.185	-248.183	15_Peptide-Peptide.out	-247.119	-248.185	-248.184	15_Peptide-Peptide_0.90.out	2.88044	8.27357	7.23784	-1.03573
15_Peptide-Peptide_0.95.out	-494.244	-496.384	-496.379	1.06848		15_Peptide-Peptide.out	-247.118	-248.185	-248.183	15_Peptide-Peptide.out	-247.119	-248.185	-248.184	15_Peptide-Peptide_0.95.out	4.0763	8.70121	7.84268	-0.858528
15_Peptide-Peptide_1.00.out	-494.245	-496.384	-496.38	1.06853		15_Peptide-Peptide.out	-247.118	-248.185	-248.183	15_Peptide-Peptide.out	-247.119	-248.185	-248.184	15_Peptide-Peptide_1.00.out	4.76154	8.72939	8.01634	-0.713051
15_Peptide-Peptide_1.05.out	-494.245	-496.384	-496.379	1.06856		15_Peptide-Peptide.out	-247.118	-248.185	-248.183	15_Peptide-Peptide.out	-247.119	-248.185	-248.184	15_Peptide-Peptide_1.05.out	5.0982	8.50327	7.90961	-0.593662
15_Peptide-Peptide_1.10.out	-494.245	-496.383	-496.379	1.0686		15_Peptide-Peptide.out	-247.118	-248.185	-248.183	15_Peptide-Peptide.out	-247.119	-248.185	-248.184	15_Peptide-Peptide_1.10.out	5.19877	8.12348	7.6274	-0.496081
15_Peptide-Peptide_1.25.out	-494.245	-496.381	-496.377	1.06868		15_Peptide-Peptide.out	-247.118	-248.185	-248.183	15_Peptide-Peptide.out	-247.119	-248.185	-248.184	15_Peptide-Peptide_1.25.out	4.77762	6.6394	6.34308	-0.296314
15_Peptide-Peptide_1.50.out	-494.243	-496.377	-496.374	1.06875		15_Peptide-Peptide.out	-247.118	-248.185	-248.183	15_Peptide-Peptide.out	-247.119	-248.185	-248.184	15_Peptide-Peptide_1.50.out	3.50907	4.39437	4.26036	-0.134014
15_Peptide-Peptide_2.00.out	-494.24	-496.373	-496.37	1.06882		15_Peptide-Peptide.out	-247.118	-248.185	-248.183	15_Peptide-Peptide.out	-247.119	-248.185	-248.184	15_Peptide-Peptide_2.00.out	1.62681	1.77056	1.74992	-0.0206338
16_Peptide-Water_0.90.out	-323.189	-324.558	-324.553	1.07139		16_Peptide-Water.out	-247.119	-248.185	-248.184	16_Peptide-Water.out	-76.0661	-76.3655	-76.362	16_Peptide-Water_0.90.out	2.3459	4.84701	4.39312	-0.453884
16_Peptide-Water_0.95.out	-323.19	-324.559	-324.553	1.07144		16_Peptide-Water.out	-247.119	-248.185	-248.184	16_Peptide-Water.out	-76.0661	-76.3655	-76.362	16_Peptide-Water_0.95.out	3.1232	5.16274	4.8089	-0.35384
16_Peptide-Water_1.00.out	-323.19	-324.559	-324.553	1.07148		16_Peptide-Water.out	-247.119	-248.185	-248.184	16_Peptide-Water.out	-76.0661	-76.3655	-76.362	16_Peptide-Water_1.00.out	3.52275	5.18525	4.90843	-0.276825
16_Peptide-Water_1.05.out	-323.191	-324.559	-324.553	1.07152		16_Peptide-Water.out	-247.119	-248.185	-248.184	16_Peptide-Water.out	-76.0661	-76.3655	-76.362	16_Peptide-Water_1.05.out	3.67626	5.02997	4.81259	-0.217382
16_Peptide-Water_1.10.out	-323.191	-324.558	-324.553	1.07155		16_Peptide-Water.out	-247.119	-248.185	-248.184	16_Peptide-Water.out	-76.0661	-76.3655	-76.362	16_Peptide-Water_1.10.out	3.67213	4.77371	4.60215	-0.171555
16_Peptide-Water_1.25.out	-323.19	-324.557	-324.551	1.07162		16_Peptide-Water.out	-247.119	-248.185	-248.184	16_Peptide-Water.out	-76.0661	-76.3655	-76.362	16_Peptide-Water_1.25.out	3.22806	3.81601	3.72961	-0.0863992
16_Peptide-Water_1.50.out	-323.188	-324.555	-324.549	1.07166		16_Peptide-Water.out	-247.119	-248.185	-248.184	16_Peptide-Water.out	-76.0661	-76.3655	-76.362	16_Peptide-Water_1.50.out	2.28541	2.47397	2.44585	-0.0281251
16_Peptide-Water_2.00.out	-323.187	-324.553	-324.547	1.07169		16_Peptide-Water.out	-247.119	-248.185	-248.184	16_Peptide-Water.out	-76.0661	-76.3655	-76.362	16_Peptide-Water_2.00.out	1.171	1.15215	1.1541	0.00195424
17_Uracil-Uracil_BP_0.90.out	-825.315	-828.648	-828.564	1.07004		17_Uracil-Uracil_BP.out	-412.65	-414.311	-414.27	17_Uracil-Uracil_BP.out	-412.65	-414.311	-414.27	17_Uracil-Uracil_BP_0.90.out	9.9862	16.1234	14.7819	-1.34157
17_Uracil-Uracil_BP_0.95.out	-825.318	-828.649	-828.566	1.07006		17_Uracil-Uracil_BP.out	-412.65	-414.311	-414.27	17_Uracil-Uracil_BP.out	-412.65	-414.311	-414.27	17_Uracil-Uracil_BP_0.95.out	11.9766	17.1435	16.067	-1.07649
17_Uracil-Uracil_BP_1.00.out	-825.32	-828.649	-828.567	1.07008		17_Uracil-Uracil_BP.out	-412.65	-414.311	-414.27	17_Uracil-Uracil_BP.out	-412.65	-414.311	-414.27	17_Uracil-Uracil_BP_1.00.out	12.9583	17.2922	16.4344	-0.857813
17_Uracil-Uracil_BP_1.05.out	-825.32	-828.649	-828.566	1.07011		17_Uracil-Uracil_BP.out	-412.65	-414.311	-414.27	17_Uracil-Uracil_BP.out	-412.65	-414.311	-414.27	17_Uracil-Uracil_BP_1.05.out	13.2531	16.8761	16.1967	-0.679329
17_Uracil-Uracil_BP_1.10.out	-825.32	-828.648	-828.565	1.07013		17_Uracil-Uracil_BP.out	-412.65	-414.311	-414.27	17_Uracil-Uracil_BP.out	-412.65	-414.311	-414.27	17_Uracil-Uracil_BP_1.10.out	13.0895	16.1112	15.5754	-0.535759
17_Uracil-Uracil_BP_1.25.out	-825.317	-828.643	-828.561	1.0702		17_Uracil-Uracil_BP.out	-412.65	-414.311	-414.27	17_Uracil-Uracil_BP.out	-412.65	-414.311	-414.27	17_Uracil-Uracil_BP_1.25.out	11.2685	13	12.7418	-0.258228
17_Uracil-Uracil_BP_1.50.out	-825.311	-828.635	-828.553	1.07026		17_Uracil-Uracil_BP.out	-412.65	-414.311	-414.27	17_Uracil-Uracil_BP.out	-412.65	-414.311	-414.27	17_Uracil-Uracil_BP_1.50.out	7.57431	8.21646	8.14583	-0.0706329
17_Uracil-Uracil_BP_2.00.out	-825.305	-828.627	-828.546	1.0703		17_Uracil-Uracil_BP.out	-412.65	-414.311	-414.27	17_Uracil-Uracil_BP.out	-412.65	-414.311	-414.27	17_Uracil-Uracil_BP_2.00.out	3.26817	3.27392	3.28213	0.0082101
18_Water-Pyridine_0.90.out	-322.865	-324.265	-324.244	1.06621		18_Water-Pyridine.out	-76.0655	-76.3653	-76.3618	18_Water-Pyridine.out	-246.794	-247.888	-247.872	18_Water-Pyridine_0.90.out	3.3177	6.78944	5.96182	-0.827623
18_Water-Pyridine_0.95.out	-322.866	-324.265	-324.244	1.06624		18_Water-Pyridine.out	-76.0655	-76.3653	-76.3618	18_Water-Pyridine.out	-246.794	-247.888	-247.872	18_Water-Pyridine_0.95.out	4.17929	7.11282	6.42207	-0.690749
18_Water-Pyridine_1.00.out	-322.867	-324.265	-324.244	1.06627		18_Water-Pyridine.out	-76.0655	-76.3653	-76.3618	18_Water-Pyridine.out	-246.794	-247.888	-247.872	18_Water-Pyridine_1.00.out	4.59686	7.07367	6.49697	-0.576707
18_Water-Pyridine_1.05.out	-322.867	-324.265	-324.244	1.06629		18_Water-Pyridine.out	-76.0655	-76.3653	-76.3618	18_Water-Pyridine.out	-246.794	-247.888	-247.872	18_Water-Pyridine_1.05.out	4.72111	6.81126	6.32907	-0.482194
18_Water-Pyridine_1.10.out	-322.867	-324.264	-324.244	1.06632		18_Water-Pyridine.out	-76.0655	-76.3653	-76.3618	18_Water-Pyridine.out	-246.794	-247.888	-247.872	18_Water-Pyridine_1.10.out	4.65608	6.42099	6.01645	-0.404541
18_Water-Pyridine_1.25.out	-322.866	-324.262	-324.242	1.06638		18_Water-Pyridine.out	-76.0655	-76.3653	-76.3618	18_Water-Pyridine.out	-246.794	-247.888	-247.872	18_Water-Pyridine_1.25.out	3.94469	5.01441	4.76825	-0.246161
18_Water-Pyridine_1.50.out	-322.863	-324.259	-324.239	1.06645		18_Water-Pyridine.out	-76.0655	-76.3653	-76.3618	18_Water-Pyridine.out	-246.794	-247.888	-247.872	18_Water-Pyridine_1.50.out	2.58207	3.06309	2.94142	-0.121671
18_Water-Pyridine_2.00.out	-322.861	-324.256	-324.236	1.06649		18_Water-Pyridine.out	-76.0655	-76.3653	-76.3618	18_Water-Pyridine.out	-246.794	-247.888	-247.872	18_Water-Pyridine_2.00.out	1.10514	1.2204	1.17821	-0.0421876
19_MeOH-Pyridine_0.90.out	-361.897	-363.483	-363.469	1.06568		19_MeOH-Pyridine.out	-115.099	-115.583	-115.587	19_MeOH-Pyridine.out	-246.794	-247.888	-247.872	19_MeOH-Pyridine_0.90.out	2.70007	7.27757	6.14367	-1.1339
19_MeOH-Pyridine_0.95.out	-361.899	-363.484	-363.47	1.06572		19_MeOH-Pyridine.out	-115.099	-115.583	-115.587	19_MeOH-Pyridine.out	-246.794	-247.888	-247.872	19_MeOH-Pyridine_0.95.out	3.78028	7.68878	6.7346	-0.954185
19_MeOH-Pyridine_1.00.out	-361.9	-363.484	-363.47	1.06575		19_MeOH-Pyridine.out	-115.099	-115.583	-115.587	19_MeOH-Pyridine.out	-246.794	-247.888	-247.872	19_MeOH-Pyridine_1.00.out	4.36055	7.69569	6.89261	-0.803079
19_MeOH-Pyridine_1.05.out	-361.9	-363.484	-363.47	1.06579		19_MeOH-Pyridine.out	-115.099	-115.583	-115.587	19_MeOH-Pyridine.out	-246.794	-247.888	-247.872	19_MeOH-Pyridine_1.05.out	4.60435	7.44918	6.77251	-0.676675
19_MeOH-Pyridine_1.10.out	-361.9	-363.483	-363.47	1.06582		19_MeOH-Pyridine.out	-115.099	-115.583	-115.587	19_MeOH-Pyridine.out	-246.794	-247.888	-247.872	19_MeOH-Pyridine_1.10.out	4.62524	7.05351	6.48166	-0.571853
19_MeOH-Pyridine_1.25.out	-361.899	-363.481	-363.467	1.06589		19_MeOH-Pyridine.out	-115.099	-115.583	-115.587	19_MeOH-Pyridine.out	-246.794	-247.888	-247.872	19_MeOH-Pyridine_1.25.out	4.04177	5.56266	5.20836	-0.354304
19_MeOH-Pyridine_1.50.out	-361.897	-363.477	-363.464	1.06597		19_MeOH-Pyridine.out	-115.099	-115.583	-115.587	19_MeOH-Pyridine.out	-246.794	-247.888	-247.872	19_MeOH-Pyridine_1.50.out	2.70245	3.4264	3.24802	-0.178374
19_MeOH-Pyridine_2.00.out	-361.895	-363.474	-363.461	1.06603		19_MeOH-Pyridine.out	-115.099	-115.583	-115.587	19_MeOH-Pyridine.out	-246.794	-247.888	-247.872	19_MeOH-Pyridine_2.00.out	1.16913	1.36468	1.30176	-0.0629186
20_AcOH-AcOH_0.90.out	-455.857	-457.68	-457.654	1.07397		20_AcOH-AcOH.out	-227.918	-228.826	-228.813	20_AcOH-AcOH.out	-227.918	-228.826	-228.813	20_AcOH-AcOH_0.90.out	13.0657	17.7474	16.8854	-0.862018
20_AcOH-AcOH_0.95.out	-455.86	-457.682	-457.656	1.07395		20_AcOH-AcOH.out	-227.918	-228.826	-228.813	20_AcOH-AcOH.out	-227.918	-228.826	-228.813	20_AcOH-AcOH_0.95.out	14.9107	18.9429	18.2344	-0.708579
20_AcOH-AcOH_1.00.out	-455.861	-457.682	-457.657	1.07396		20_AcOH-AcOH.out	-227.918	-228.826	-228.813	20_AcOH-AcOH.out	-227.918	-228.826	-228.813	20_AcOH-AcOH_1.00.out	15.6968	19.1376	18.5664	-0.571229
20_AcOH-AcOH_1.05.out	-455.861	-457.681	-457.656	1.07397		20_AcOH-AcOH.out	-227.918	-228.826	-228.813	20_AcOH-AcOH.out	-227.918	-228.826	-228.813	20_AcOH-AcOH_1.05.out	15.7767	18.689	18.2369	-0.452069
20_AcOH-AcOH_1.10.out	-455.861	-457.68	-457.655	1.074		20_AcOH-AcOH.out	-227.918	-228.826	-228.813	20_AcOH-AcOH.out	-227.918	-228.826	-228.813	20_AcOH-AcOH_1.10.out	15.396	17.8453	17.4936	-0.351727
20_AcOH-AcOH_1.25.out	-455.857	-457.675	-457.65	1.07409		20_AcOH-AcOH.out	-227.918	-228.826	-228.813	20_AcOH-AcOH.out	-227.918	-228.826	-228.813	20_AcOH-AcOH_1.25.out	12.9786	14.3877	14.2401	-0.147588
20_AcOH-AcOH_1.50.out	-455.85	-457.666	-457.641	1.0742		20_AcOH-AcOH.out	-227.918	-228.826	-228.813	20_AcOH-AcOH.out	-227.918	-228.826	-228.813	20_AcOH-AcOH_1.50.out	8.56408	9.05576	9.04771	-0.0080506
20_AcOH-AcOH_2.00.out	-455.842	-457.657	-457.633	1.07426		20_AcOH-AcOH.out	-227.918	-228.826	-228.813	20_AcOH-AcOH.out	-227.918	-228.826	-228.813	20_AcOH-AcOH_2.00.out	3.56966	3.52333	3.55973	0.0363929
21_AcNH2-AcNH2_0.90.out	-416.166	-417.924	-417.91	1.07011		21_AcNH2-AcNH2.out	-208.075	-208.95	-208.944	21_AcNH2-AcNH2.out	-208.075	-208.95	-208.944	21_AcNH2-AcNH2_0.90.out	9.65823	15.1224	14.2565	-0.865902
21_AcNH2-AcNH2_0.95.out	-416.169	-417.926	-417.912	1.07014		21_AcNH2-AcNH2.out	-208.075	-208.95	-208.944	21_AcNH2-AcNH2.out	-208.075	-208.95	-208.944	21_AcNH2-AcNH2_0.95.out	11.5315	16.0933	15.4222	-0.671092
21_AcNH2-AcNH2_1.00.out	-416.17	-417.926	-417.913	1.07018		21_AcNH2-AcNH2.out	-208.075	-208.95	-208.944	21_AcNH2-AcNH2.out	-208.075	-208.95	-208.944	21_AcNH2-AcNH2_1.00.out	12.4408	16.2349	15.722	-0.512877
21_AcNH2-AcNH2_1.05.out	-416.171	-417.926	-417.912	1.07023		21_AcNH2-AcNH2.out	-208.075	-208.95	-208.944	21_AcNH2-AcNH2.out	-208.075	-208.95	-208.944	21_AcNH2-AcNH2_1.05.out	12.7002	15.8445	15.4584	-0.386177
21_AcNH2-AcNH2_1.10.out	-416.17	-417.924	-417.911	1.07027		21_AcNH2-AcNH2.out	-208.075	-208.95	-208.944	21_AcNH2-AcNH2.out	-208.075	-208.95	-208.944	21_AcNH2-AcNH2_1.10.out	12.5307	15.13	14.8435	-0.286446
21_AcNH2-AcNH2_1.25.out	-416.168	-417.92	-417.907	1.07037		21_AcNH2-AcNH2.out	-208.075	-208.95	-208.944	21_AcNH2-AcNH2.out	-208.075	-208.95	-208.944	21_AcNH2-AcNH2_1.25.out	10.8018	12.2457	12.1433	-0.102408
21_AcNH2-AcNH2_1.50.out	-416.162	-417.913	-417.9	1.07045		21_AcNH2-AcNH2.out	-208.075	-208.95	-208.944	21_AcNH2-AcNH2.out	-208.075	-208.95	-208.944	21_AcNH2-AcNH2_1.50.out	7.37392	7.86393	7.87155	0.00761925
21_AcNH2-AcNH2_2.00.out	-416.155	-417.905	-417.893	1.0705		21_AcNH2-AcNH2.out	-208.075	-208.95	-208.944	21_AcNH2-AcNH2.out	-208.075	-208.95	-208.944	21_AcNH2-AcNH2_2.00.out	3.0158	2.95368	2.98986	0.0361844
22_AcOH-Uracil_0.90.out	-640.588	-643.166	-643.111	1.07144		22_AcOH-Uracil.out	-227.918	-228.826	-228.813	22_AcOH-Uracil.out	-412.649	-414.311	-414.27	22_AcOH-Uracil_0.90.out	12.9722	18.2391	17.2035	-1.03563
22_AcOH-Uracil_0.95.out	-640.591	-643.167	-643.113	1.07145		22_AcOH-Uracil.out	-227.918	-228.826	-228.813	22_AcOH-Uracil.out	-412.649	-414.311	-414.27	22_AcOH-Uracil_0.95.out	14.9108	19.3587	18.5353	-0.823428
22_AcOH-Uracil_1.00.out	-640.593	-643.168	-643.114	1.07147		22_AcOH-Uracil.out	-227.918	-228.826	-228.813	22_AcOH-Uracil.out	-412.649	-414.311	-414.27	22_AcOH-Uracil_1.00.out	15.8107	19.5384	18.8957	-0.642788
22_AcOH-Uracil_1.05.out	-640.593	-643.167	-643.113	1.07149		22_AcOH-Uracil.out	-227.918	-228.826	-228.813	22_AcOH-Uracil.out	-412.649	-414.311	-414.27	22_AcOH-Uracil_1.05.out	16.0057	19.1064	18.6148	-0.491667
22_AcOH-Uracil_1.10.out	-640.593	-643.166	-643.112	1.07152		22_AcOH-Uracil.out	-227.918	-228.826	-228.813	22_AcOH-Uracil.out	-412.649	-414.311	-414.27	22_AcOH-Uracil_1.10.out	15.7313	18.2935	17.9257	-0.367803
22_AcOH-Uracil_1.25.out	-640.589	-643.16	-643.107	1.07159		22_AcOH-Uracil.out	-227.918	-228.826	-228.813	22_AcOH-Uracil.out	-412.649	-414.311	-414.27	22_AcOH-Uracil_1.25.out	13.5513	14.9346	14.8106	-0.123924
22_AcOH-Uracil_1.50.out	-640.582	-643.152	-643.099	1.07167		22_AcOH-Uracil.out	-227.918	-228.826	-228.813	22_AcOH-Uracil.out	-412.649	-414.311	-414.27	22_AcOH-Uracil_1.50.out	9.29493	9.67245	9.70867	0.0362274
22_AcOH-Uracil_2.00.out	-640.574	-643.143	-643.09	1.07171		22_AcOH-Uracil.out	-227.918	-228.826	-228.813	22_AcOH-Uracil.out	-412.649	-414.311	-414.27	22_AcOH-Uracil_2.00.out	4.22694	4.05134	4.13103	0.0796855
23_AcNH2-Uracil_0.90.out	-620.744	-623.289	-623.241	1.07008		23_AcNH2-Uracil.out	-208.075	-208.95	-208.944	23_AcNH2-Uracil.out	-412.649	-414.311	-414.27	23_AcNH2-Uracil_0.90.out	12.4908	18.0268	16.9698	-1.05702
23_AcNH2-Uracil_0.95.out	-620.747	-623.291	-623.243	1.0701		23_AcNH2-Uracil.out	-208.075	-208.95	-208.944	23_AcNH2-Uracil.out	-412.649	-414.311	-414.27	23_AcNH2-Uracil_0.95.out	14.4294	19.0577	18.2298	-0.82785
23_AcNH2-Uracil_1.00.out	-620.749	-623.291	-623.243	1.07013		23_AcNH2-Uracil.out	-208.075	-208.95	-208.944	23_AcNH2-Uracil.out	-412.649	-414.311	-414.27	23_AcNH2-Uracil_1.00.out	15.3927	19.2359	18.5994	-0.636486
23_AcNH2-Uracil_1.05.out	-620.749	-623.291	-623.243	1.07016		23_AcNH2-Uracil.out	-208.075	-208.95	-208.944	23_AcNH2-Uracil.out	-412.649	-414.311	-414.27	23_AcNH2-Uracil_1.05.out	15.6836	18.852	18.3733	-0.47875
23_AcNH2-Uracil_1.10.out	-620.749	-623.29	-623.242	1.07019		23_AcNH2-Uracil.out	-208.075	-208.95	-208.944	23_AcNH2-Uracil.out	-412.649	-414.311	-414.27	23_AcNH2-Uracil_1.10.out	15.5184	18.1131	17.7622	-0.350927
23_AcNH2-Uracil_1.25.out	-620.746	-623.285	-623.237	1.07027		23_AcNH2-Uracil.out	-208.075	-208.95	-208.944	23_AcNH2-Uracil.out	-412.649	-414.311	-414.27	23_AcNH2-Uracil_1.25.out	13.6537	15.0078	14.9052	-0.102566
23_AcNH2-Uracil_1.50.out	-620.74	-623.277	-623.23	1.07034		23_AcNH2-Uracil.out	-208.075	-208.95	-208.944	23_AcNH2-Uracil.out	-412.649	-414.311	-414.27	23_AcNH2-Uracil_1.50.out	9.73334	10.0404	10.0993	0.058888
23_AcNH2-Uracil_2.00.out	-620.732	-623.268	-623.221	1.07037		23_AcNH2-Uracil.out	-208.075	-208.95	-208.944	23_AcNH2-Uracil.out	-412.649	-414.311	-414.27	23_AcNH2-Uracil_2.00.out	4.8144	4.5528	4.65473	0.101926
24_Benzene-Benzene_pi-pi_0.90.out	-461.569	-463.706	-463.679	1.06038		24_Benzene-Benzene_pi-pi.out	-230.795	-231.85	-231.841	24_Benzene-Benzene_pi-pi.out	-230.795	-231.85	-231.841	24_Benzene-Benzene_pi-pi_0.90.out	-13.2386	4.06726	-2.28761	-6.35488
24_Benzene-Benzene_pi-pi_0.95.out	-461.577	-463.707	-463.682	1.06053		24_Benzene-Benzene_pi-pi.out	-230.795	-231.85	-231.841	24_Benzene-Benzene_pi-pi.out	-230.795	-231.85	-231.841	24_Benzene-Benzene_pi-pi_0.95.out	-8.24088	5.03288	0.130334	-4.90255
24_Benzene-Benzene_pi-pi_1.00.out	-461.582	-463.707	-463.684	1.06065		24_Benzene-Benzene_pi-pi.out	-230.795	-231.85	-231.841	24_Benzene-Benzene_pi-pi.out	-230.795	-231.85	-231.841	24_Benzene-Benzene_pi-pi_1.00.out	-5.20572	5.04036	1.23299	-3.80738
24_Benzene-Benzene_pi-pi_1.05.out	-461.585	-463.707	-463.685	1.06075		24_Benzene-Benzene_pi-pi.out	-230.795	-231.85	-231.841	24_Benzene-Benzene_pi-pi.out	-230.795	-231.85	-231.841	24_Benzene-Benzene_pi-pi_1.05.out	-3.35259	4.60422	1.62971	-2.97451
24_Benzene-Benzene_pi-pi_1.10.out	-461.587	-463.706	-463.685	1.06082		24_Benzene-Benzene_pi-pi.out	-230.795	-231.85	-231.841	24_Benzene-Benzene_pi-pi.out	-230.795	-231.85	-231.841	24_Benzene-Benzene_pi-pi_1.10.out	-2.21616	4.00335	1.66514	-2.33822
24_Benzene-Benzene_pi-pi_1.25.out	-461.589	-463.703	-463.684	1.06097		24_Benzene-Benzene_pi-pi.out	-230.795	-231.85	-231.841	24_Benzene-Benzene_pi-pi.out	-230.795	-231.85	-231.841	24_Benzene-Benzene_pi-pi_1.25.out	-0.7607	2.25114	1.10276	-1.14838
24_Benzene-Benzene_pi-pi_1.50.out	-461.59	-463.701	-463.683	1.06111		24_Benzene-Benzene_pi-pi.out	-230.795	-231.85	-231.841	24_Benzene-Benzene_pi-pi.out	-230.795	-231.85	-231.841	24_Benzene-Benzene_pi-pi_1.50.out	-0.244362	0.735623	0.357622	-0.378001
24_Benzene-Benzene_pi-pi_2.00.out	-461.59	-463.7	-463.682	1.06119		24_Benzene-Benzene_pi-pi.out	-230.795	-231.85	-231.841	24_Benzene-Benzene_pi-pi.out	-230.795	-231.85	-231.841	24_Benzene-Benzene_pi-pi_2.00.out	-0.0626349	0.117886	0.0484446	-0.0694413
25_Pyridine-Pyridine_pi-pi_0.90.out	-493.567	-495.785	-495.743	1.06161		25_Pyridine-Pyridine_pi-pi.out	-246.794	-247.888	-247.872	25_Pyridine-Pyridine_pi-pi.out	-246.794	-247.888	-247.872	25_Pyridine-Pyridine_pi-pi_0.90.out	-12.3976	5.40686	-1.2458	-6.65266
25_Pyridine-Pyridine_pi-pi_0.95.out	-493.575	-495.787	-495.747	1.06175		25_Pyridine-Pyridine_pi-pi.out	-246.794	-247.888	-247.872	25_Pyridine-Pyridine_pi-pi.out	-246.794	-247.888	-247.872	25_Pyridine-Pyridine_pi-pi_0.95.out	-7.43762	6.34635	1.16779	-5.17855
25_Pyridine-Pyridine_pi-pi_1.00.out	-493.58	-495.787	-495.748	1.06186		25_Pyridine-Pyridine_pi-pi.out	-246.794	-247.888	-247.872	25_Pyridine-Pyridine_pi-pi.out	-246.794	-247.888	-247.872	25_Pyridine-Pyridine_pi-pi_1.00.out	-4.4106	6.31626	2.26147	-4.05479
25_Pyridine-Pyridine_pi-pi_1.05.out	-493.583	-495.786	-495.749	1.06195		25_Pyridine-Pyridine_pi-pi.out	-246.794	-247.888	-247.872	25_Pyridine-Pyridine_pi-pi.out	-246.794	-247.888	-247.872	25_Pyridine-Pyridine_pi-pi_1.05.out	-2.56762	5.82241	2.6302	-3.1922
25_Pyridine-Pyridine_pi-pi_1.10.out	-493.585	-495.785	-495.749	1.06201		25_Pyridine-Pyridine_pi-pi.out	-246.794	-247.888	-247.872	25_Pyridine-Pyridine_pi-pi.out	-246.794	-247.888	-247.872	25_Pyridine-Pyridine_pi-pi_1.10.out	-1.45263	5.14697	2.61916	-2.52781
25_Pyridine-Pyridine_pi-pi_1.25.out	-493.587	-495.782	-495.748	1.06215		25_Pyridine-Pyridine_pi-pi.out	-246.794	-247.888	-247.872	25_Pyridine-Pyridine_pi-pi.out	-246.794	-247.888	-247.872	25_Pyridine-Pyridine_pi-pi_1.25.out	-0.140392	3.18204	1.88399	-1.29805
25_Pyridine-Pyridine_pi-pi_1.50.out	-493.587	-495.779	-495.746	1.06227		25_Pyridine-Pyridine_pi-pi.out	-246.794	-247.888	-247.872	25_Pyridine-Pyridine_pi-pi.out	-246.794	-247.888	-247.872	25_Pyridine-Pyridine_pi-pi_1.50.out	0.160081	1.26298	0.817996	-0.444984
25_Pyridine-Pyridine_pi-pi_2.00.out	-493.587	-495.777	-495.745	1.06235		25_Pyridine-Pyridine_pi-pi.out	-246.794	-247.888	-247.872	25_Pyridine-Pyridine_pi-pi.out	-246.794	-247.888	-247.872	25_Pyridine-Pyridine_pi-pi_2.00.out	0.10922	0.305902	0.22201	-0.0838925
26_Uracil-Uracil_pi-pi_0.90.out	-825.29	-828.639	-828.55	1.06968		26_Uracil-Uracil_pi-pi.out	-412.651	-414.311	-414.271	26_Uracil-Uracil_pi-pi.out	-412.651	-414.311	-414.271	26_Uracil-Uracil_pi-pi_0.90.out	-7.41389	10.1988	5.04767	-5.15117
26_Uracil-Uracil_pi-pi_0.95.out	-825.297	-828.641	-828.553	1.06978		26_Uracil-Uracil_pi-pi.out	-412.651	-414.311	-414.271	26_Uracil-Uracil_pi-pi.out	-412.651	-414.311	-414.271	26_Uracil-Uracil_pi-pi_0.95.out	-2.71891	11.3397	7.20651	-4.13323
26_Uracil-Uracil_pi-pi_1.00.out	-825.301	-828.641	-828.554	1.06986		26_Uracil-Uracil_pi-pi.out	-412.651	-414.311	-414.271	26_Uracil-Uracil_pi-pi.out	-412.651	-414.311	-414.271	26_Uracil-Uracil_pi-pi_1.00.out	0.0257742	11.2816	7.95028	-3.33129
26_Uracil-Uracil_pi-pi_1.05.out	-825.304	-828.64	-828.554	1.06993		26_Uracil-Uracil_pi-pi.out	-412.651	-414.311	-414.271	26_Uracil-Uracil_pi-pi.out	-412.651	-414.311	-414.271	26_Uracil-Uracil_pi-pi_1.05.out	1.562	10.5973	7.9015	-2.69576
26_Uracil-Uracil_pi-pi_1.10.out	-825.305	-828.638	-828.553	1.06999		26_Uracil-Uracil_pi-pi.out	-412.651	-414.311	-414.271	26_Uracil-Uracil_pi-pi.out	-412.651	-414.311	-414.271	26_Uracil-Uracil_pi-pi_1.10.out	2.35527	9.63081	7.43948	-2.19132
26_Uracil-Uracil_pi-pi_1.25.out	-825.306	-828.633	-828.55	1.07012		26_Uracil-Uracil_pi-pi.out	-412.651	-414.311	-414.271	26_Uracil-Uracil_pi-pi.out	-412.651	-414.311	-414.271	26_Uracil-Uracil_pi-pi_1.25.out	2.73349	6.60247	5.39433	-1.20814
26_Uracil-Uracil_pi-pi_1.50.out	-825.304	-828.628	-828.546	1.07023		26_Uracil-Uracil_pi-pi.out	-412.651	-414.311	-414.271	26_Uracil-Uracil_pi-pi.out	-412.651	-414.311	-414.271	26_Uracil-Uracil_pi-pi_1.50.out	1.89427	3.33044	2.84311	-0.487334
26_Uracil-Uracil_pi-pi_2.00.out	-825.303	-828.624	-828.543	1.07031		26_Uracil-Uracil_pi-pi.out	-412.651	-414.311	-414.271	26_Uracil-Uracil_pi-pi.out	-412.651	-414.311	-414.271	26_Uracil-Uracil_pi-pi_2.00.out	0.819559	1.05724	0.95423	-0.103008
27_Benzene-Pyridine_pi-pi_0.90.out	-477.568	-479.746	-479.711	1.061		27_Benzene-Pyridine_pi-pi.out	-230.795	-231.85	-231.841	27_Benzene-Pyridine_pi-pi.out	-246.794	-247.888	-247.872	27_Benzene-Pyridine_pi-pi_0.90.out	-13.0456	4.70179	-1.84796	-6.54975
27_Benzene-Pyridine_pi-pi_0.95.out	-477.576	-479.747	-479.715	1.06115		27_Benzene-Pyridine_pi-pi.out	-230.795	-231.85	-231.841	27_Benzene-Pyridine_pi-pi.out	-246.794	-247.888	-247.872	27_Benzene-Pyridine_pi-pi_0.95.out	-7.81555	5.74811	0.711852	-5.03626
27_Benzene-Pyridine_pi-pi_1.00.out	-477.581	-479.747	-479.716	1.06127		27_Benzene-Pyridine_pi-pi.out	-230.795	-231.85	-231.841	27_Benzene-Pyridine_pi-pi.out	-246.794	-247.888	-247.872	27_Benzene-Pyridine_pi-pi_1.00.out	-4.70099	5.74232	1.83917	-3.90315
27_Benzene-Pyridine_pi-pi_1.05.out	-477.584	-479.747	-479.717	1.06136		27_Benzene-Pyridine_pi-pi.out	-230.795	-231.85	-231.841	27_Benzene-Pyridine_pi-pi.out	-246.794	-247.888	-247.872	27_Benzene-Pyridine_pi-pi_1.05.out	-2.83931	5.2571	2.2108	-3.0463
27_Benzene-Pyridine_pi-pi_1.10.out	-477.586	-479.745	-479.717	1.06143		27_Benzene-Pyridine_pi-pi.out	-230.795	-231.85	-231.841	27_Benzene-Pyridine_pi-pi.out	-246.794	-247.888	-247.872	27_Benzene-Pyridine_pi-pi_1.10.out	-1.72574	4.59672	2.20227	-2.39445
27_Benzene-Pyridine_pi-pi_1.25.out	-477.588	-479.742	-479.716	1.06157		27_Benzene-Pyridine_pi-pi.out	-230.795	-231.85	-231.841	27_Benzene-Pyridine_pi-pi.out	-246.794	-247.888	-247.872	27_Benzene-Pyridine_pi-pi_1.25.out	-0.407423	2.73026	1.52081	-1.20945
27_Benzene-Pyridine_pi-pi_1.50.out	-477.589	-479.74	-479.714	1.0617		27_Benzene-Pyridine_pi-pi.out	-230.795	-231.85	-231.841	27_Benzene-Pyridine_pi-pi.out	-246.794	-247.888	-247.872	27_Benzene-Pyridine_pi-pi_1.50.out	-0.030108	0.991477	0.588462	-0.403015
27_Benzene-Pyridine_pi-pi_2.00.out	-477.589	-479.738	-479.714	1.06178		27_Benzene-Pyridine_pi-pi.out	-230.795	-231.85	-231.841	27_Benzene-Pyridine_pi-pi.out	-246.794	-247.888	-247.872	27_Benzene-Pyridine_pi-pi_2.00.out	0.0221438	0.205235	0.13108	-0.074155
28_Benzene-Uracil_pi-pi_0.90.out	-643.428	-646.172	-646.114	1.06597	awk:	28_Benzene-Uracil_pi-pi.out	-230.795	-231.85	-231.841	28_Benzene-Uracil_pi-pi.out	-412.651	-414.312	-414.271	28_Benzene-Uracil_pi-pi_0.90.out	-11.6222	6.84562	0.761798	-6.08382
28_Benzene-Uracil_pi-pi_0.95.out	-643.436	-646.174	-646.117	1.0661	28TEST_0.95.out	28_Benzene-Uracil_pi-pi.out	-230.795	-231.85	-231.841	28_Benzene-Uracil_pi-pi.out	-412.651	-414.312	-414.271	28_Benzene-Uracil_pi-pi_0.95.out	-6.73025	7.81446	3.00449	-4.80997
28_Benzene-Uracil_pi-pi_1.00.out	-643.441	-646.174	-646.119	1.06621	awk:	28_Benzene-Uracil_pi-pi.out	-230.795	-231.85	-231.841	28_Benzene-Uracil_pi-pi.out	-412.651	-414.312	-414.271	28_Benzene-Uracil_pi-pi_1.00.out	-3.73774	7.75515	3.93738	-3.81776
28_Benzene-Uracil_pi-pi_1.05.out	-643.444	-646.173	-646.119	1.0663	28TEST2_0.95.out	28_Benzene-Uracil_pi-pi.out	-230.795	-231.85	-231.841	28_Benzene-Uracil_pi-pi.out	-412.651	-414.312	-414.271	28_Benzene-Uracil_pi-pi_1.05.out	-1.9335	7.17772	4.13633	-3.04139
28_Benzene-Uracil_pi-pi_1.10.out	-643.445	-646.172	-646.119	1.06637	28TEST3_0.95.out	28_Benzene-Uracil_pi-pi.out	-230.795	-231.85	-231.841	28_Benzene-Uracil_pi-pi.out	-412.651	-414.312	-414.271	28_Benzene-Uracil_pi-pi_1.10.out	-0.871141	6.38154	3.94826	-2.43328
28_Benzene-Uracil_pi-pi_1.25.out	-643.447	-646.168	-646.117	1.06651		28_Benzene-Uracil_pi-pi.out	-230.795	-231.85	-231.841	28_Benzene-Uracil_pi-pi.out	-412.651	-414.312	-414.271	28_Benzene-Uracil_pi-pi_1.25.out	0.234338	3.99006	2.71093	-1.27913
28_Benzene-Uracil_pi-pi_1.50.out	-643.447	-646.164	-646.114	1.06664		28_Benzene-Uracil_pi-pi.out	-230.795	-231.85	-231.841	28_Benzene-Uracil_pi-pi.out	-412.651	-414.312	-414.271	28_Benzene-Uracil_pi-pi_1.50.out	0.250301	1.64014	1.15715	-0.482998
28_Benzene-Uracil_pi-pi_2.00.out	-643.447	-646.162	-646.113	1.06672		28_Benzene-Uracil_pi-pi.out	-230.795	-231.85	-231.841	28_Benzene-Uracil_pi-pi.out	-412.651	-414.312	-414.271	28_Benzene-Uracil_pi-pi_2.00.out	0.0299032	0.319563	0.218606	-0.100957
29_Pyridine-Uracil_pi-pi_0.90.out	-659.425	-662.212	-662.145	1.06639		29_Pyridine-Uracil_pi-pi.out	-246.793	-247.888	-247.872	29_Pyridine-Uracil_pi-pi.out	-412.651	-414.312	-414.271	29_Pyridine-Uracil_pi-pi_0.90.out	-12.1268	7.26203	0.816302	-6.44573
29_Pyridine-Uracil_pi-pi_0.95.out	-659.436	-662.214	-662.15	1.06654		29_Pyridine-Uracil_pi-pi.out	-246.793	-247.888	-247.872	29_Pyridine-Uracil_pi-pi.out	-412.651	-414.312	-414.271	29_Pyridine-Uracil_pi-pi_0.95.out	-5.80752	8.81319	3.92772	-4.88547
29_Pyridine-Uracil_pi-pi_1.00.out	-659.441	-662.214	-662.152	1.06666		29_Pyridine-Uracil_pi-pi.out	-246.793	-247.888	-247.872	29_Pyridine-Uracil_pi-pi.out	-412.651	-414.312	-414.271	29_Pyridine-Uracil_pi-pi_1.00.out	-2.28901	8.81657	5.08171	-3.73486
29_Pyridine-Uracil_pi-pi_1.05.out	-659.444	-662.213	-662.152	1.06676		29_Pyridine-Uracil_pi-pi.out	-246.793	-247.888	-247.872	29_Pyridine-Uracil_pi-pi.out	-412.651	-414.312	-414.271	29_Pyridine-Uracil_pi-pi_1.05.out	-0.371092	8.11995	5.24285	-2.87711
29_Pyridine-Uracil_pi-pi_1.10.out	-659.446	-662.212	-662.151	1.06682		29_Pyridine-Uracil_pi-pi.out	-246.793	-247.888	-247.872	29_Pyridine-Uracil_pi-pi.out	-412.651	-414.312	-414.271	29_Pyridine-Uracil_pi-pi_1.10.out	0.631871	7.16837	4.9349	-2.23347
29_Pyridine-Uracil_pi-pi_1.25.out	-659.447	-662.207	-662.149	1.06696		29_Pyridine-Uracil_pi-pi.out	-246.793	-247.888	-247.872	29_Pyridine-Uracil_pi-pi.out	-412.651	-414.312	-414.271	29_Pyridine-Uracil_pi-pi_1.25.out	1.36708	4.46724	3.37627	-1.09097
29_Pyridine-Uracil_pi-pi_1.50.out	-659.446	-662.203	-662.146	1.06707		29_Pyridine-Uracil_pi-pi.out	-246.793	-247.888	-247.872	29_Pyridine-Uracil_pi-pi.out	-412.651	-414.312	-414.271	29_Pyridine-Uracil_pi-pi_1.50.out	0.98672	2.005	1.62468	-0.380324
29_Pyridine-Uracil_pi-pi_2.00.out	-659.445	-662.201	-662.144	1.06713		29_Pyridine-Uracil_pi-pi.out	-246.793	-247.888	-247.872	29_Pyridine-Uracil_pi-pi.out	-412.651	-414.312	-414.271	29_Pyridine-Uracil_pi-pi_2.00.out	0.423424	0.590857	0.51892	-0.0719367
30_Benzene-Ethene_0.90.out	-308.853	-310.294	-310.293	1.06075		30_Benzene-Ethene.out	-230.795	-231.85	-231.841	30_Benzene-Ethene.out	-78.0697	-78.4415	-78.4537	30_Benzene-Ethene_0.90.out	-7.69228	2.01911	-1.18103	-3.20014
30_Benzene-Ethene_0.95.out	-308.857	-310.295	-310.295	1.06086		30_Benzene-Ethene.out	-230.795	-231.85	-231.841	30_Benzene-Ethene.out	-78.0697	-78.4415	-78.4537	30_Benzene-Ethene_0.95.out	-5.00536	2.45627	-0.00047218	-2.45674
30_Benzene-Ethene_1.00.out	-308.86	-310.295	-310.296	1.06095		30_Benzene-Ethene.out	-230.795	-231.85	-231.841	30_Benzene-Ethene.out	-78.0697	-78.4415	-78.4537	30_Benzene-Ethene_1.00.out	-3.3314	2.42819	0.531344	-1.89684
30_Benzene-Ethene_1.05.out	-308.861	-310.295	-310.296	1.06101		30_Benzene-Ethene.out	-230.795	-231.85	-231.841	30_Benzene-Ethene.out	-78.0697	-78.4415	-78.4537	30_Benzene-Ethene_1.05.out	-2.28167	2.18538	0.713071	-1.47231
30_Benzene-Ethene_1.10.out	-308.862	-310.294	-310.296	1.06107		30_Benzene-Ethene.out	-230.795	-231.85	-231.841	30_Benzene-Ethene.out	-78.0697	-78.4415	-78.4537	30_Benzene-Ethene_1.10.out	-1.61841	1.86589	0.716628	-1.14926
30_Benzene-Ethene_1.25.out	-308.864	-310.293	-310.295	1.06117		30_Benzene-Ethene.out	-230.795	-231.85	-231.841	30_Benzene-Ethene.out	-78.0697	-78.4415	-78.4537	30_Benzene-Ethene_1.25.out	-0.724672	0.990005	0.425108	-0.564896
30_Benzene-Ethene_1.50.out	-308.864	-310.292	-310.295	1.06127		30_Benzene-Ethene.out	-230.795	-231.85	-231.841	30_Benzene-Ethene.out	-78.0697	-78.4415	-78.4537	30_Benzene-Ethene_1.50.out	-0.322405	0.28038	0.0855293	-0.19485
30_Benzene-Ethene_2.00.out	-308.865	-310.291	-310.295	1.06134		30_Benzene-Ethene.out	-230.795	-231.85	-231.841	30_Benzene-Ethene.out	-78.0697	-78.4415	-78.4537	30_Benzene-Ethene_2.00.out	-0.103904	0.0141879	-0.0212533	-0.0354413
31_Uracil-Ethene_0.90.out	-490.713	-492.759	-492.727	1.06822		31_Uracil-Ethene.out	-412.652	-414.312	-414.271	31_Uracil-Ethene.out	-78.0697	-78.4415	-78.4537	31_Uracil-Ethene_0.90.out	-4.82748	3.6863	1.27903	-2.40727
31_Uracil-Ethene_0.95.out	-490.717	-492.76	-492.728	1.0683		31_Uracil-Ethene.out	-412.652	-414.312	-414.271	31_Uracil-Ethene.out	-78.0697	-78.4415	-78.4537	31_Uracil-Ethene_0.95.out	-2.60526	4.0969	2.19536	-1.90154
31_Uracil-Ethene_1.00.out	-490.719	-492.76	-492.729	1.06837		31_Uracil-Ethene.out	-412.652	-414.312	-414.271	31_Uracil-Ethene.out	-78.0697	-78.4415	-78.4537	31_Uracil-Ethene_1.00.out	-1.23846	4.04541	2.53734	-1.50807
31_Uracil-Ethene_1.05.out	-490.721	-492.759	-492.729	1.06843		31_Uracil-Ethene.out	-412.652	-414.312	-414.271	31_Uracil-Ethene.out	-78.0697	-78.4415	-78.4537	31_Uracil-Ethene_1.05.out	-0.412324	3.75921	2.55913	-1.20009
31_Uracil-Ethene_1.10.out	-490.721	-492.759	-492.729	1.06847		31_Uracil-Ethene.out	-412.652	-414.312	-414.271	31_Uracil-Ethene.out	-78.0697	-78.4415	-78.4537	31_Uracil-Ethene_1.10.out	0.0720591	3.37286	2.41422	-0.958639
31_Uracil-Ethene_1.25.out	-490.722	-492.757	-492.728	1.06856		31_Uracil-Ethene.out	-412.652	-414.312	-414.271	31_Uracil-Ethene.out	-78.0697	-78.4415	-78.4537	31_Uracil-Ethene_1.25.out	0.546148	2.20837	1.70877	-0.499592
31_Uracil-Ethene_1.50.out	-490.722	-492.755	-492.726	1.06864		31_Uracil-Ethene.out	-412.652	-414.312	-414.271	31_Uracil-Ethene.out	-78.0697	-78.4415	-78.4537	31_Uracil-Ethene_1.50.out	0.451419	1.02065	0.838453	-0.182193
31_Uracil-Ethene_2.00.out	-490.721	-492.754	-492.725	1.06869		31_Uracil-Ethene.out	-412.652	-414.312	-414.271	31_Uracil-Ethene.out	-78.0697	-78.4415	-78.4537	31_Uracil-Ethene_2.00.out	0.189075	0.27766	0.245176	-0.0324843
32_Uracil-Ethyne_0.90.out	-489.499	-491.517	-491.473	1.06833		32_Uracil-Ethyne.out	-412.651	-414.312	-414.271	32_Uracil-Ethyne.out	-76.8536	-77.1988	-77.1991	32_Uracil-Ethyne_0.90.out	-3.81205	4.1041	1.64027	-2.46383
32_Uracil-Ethyne_0.95.out	-489.503	-491.518	-491.475	1.0684		32_Uracil-Ethyne.out	-412.651	-414.312	-414.271	32_Uracil-Ethyne.out	-76.8536	-77.1988	-77.1991	32_Uracil-Ethyne_0.95.out	-1.58414	4.56931	2.64946	-1.91984
32_Uracil-Ethyne_1.00.out	-489.505	-491.518	-491.475	1.06844		32_Uracil-Ethyne.out	-412.651	-414.312	-414.271	32_Uracil-Ethyne.out	-76.8536	-77.1988	-77.1991	32_Uracil-Ethyne_1.00.out	-0.280162	4.51611	3.01307	-1.50304
32_Uracil-Ethyne_1.05.out	-489.506	-491.517	-491.475	1.06848		32_Uracil-Ethyne.out	-412.651	-414.312	-414.271	32_Uracil-Ethyne.out	-76.8536	-77.1988	-77.1991	32_Uracil-Ethyne_1.05.out	0.452357	4.20019	3.01842	-1.18176
32_Uracil-Ethyne_1.10.out	-489.506	-491.517	-491.475	1.06851		32_Uracil-Ethyne.out	-412.651	-414.312	-414.271	32_Uracil-Ethyne.out	-76.8536	-77.1988	-77.1991	32_Uracil-Ethyne_1.10.out	0.833738	3.77185	2.83828	-0.933571
32_Uracil-Ethyne_1.25.out	-489.507	-491.514	-491.473	1.06857		32_Uracil-Ethyne.out	-412.651	-414.312	-414.271	32_Uracil-Ethyne.out	-76.8536	-77.1988	-77.1991	32_Uracil-Ethyne_1.25.out	1.03016	2.47556	2.00272	-0.472835
32_Uracil-Ethyne_1.50.out	-489.506	-491.512	-491.472	1.06862		32_Uracil-Ethyne.out	-412.651	-414.312	-414.271	32_Uracil-Ethyne.out	-76.8536	-77.1988	-77.1991	32_Uracil-Ethyne_1.50.out	0.661459	1.1439	0.976972	-0.166925
32_Uracil-Ethyne_2.00.out	-489.505	-491.511	-491.471	1.06864		32_Uracil-Ethyne.out	-412.651	-414.312	-414.271	32_Uracil-Ethyne.out	-76.8536	-77.1988	-77.1991	32_Uracil-Ethyne_2.00.out	0.224952	0.303342	0.273241	-0.0301014
33_Pyridine-Ethene_0.90.out	-324.852	-326.334	-326.325	1.06163		33_Pyridine-Ethene.out	-246.794	-247.888	-247.872	33_Pyridine-Ethene.out	-78.0697	-78.4415	-78.4537	33_Pyridine-Ethene_0.90.out	-6.88873	2.64467	-0.522394	-3.16706
33_Pyridine-Ethene_0.95.out	-324.856	-326.335	-326.327	1.06174		33_Pyridine-Ethene.out	-246.794	-247.888	-247.872	33_Pyridine-Ethene.out	-78.0697	-78.4415	-78.4537	33_Pyridine-Ethene_0.95.out	-4.493	2.97821	0.498923	-2.47929
33_Pyridine-Ethene_1.00.out	-324.859	-326.335	-326.328	1.06182		33_Pyridine-Ethene.out	-246.794	-247.888	-247.872	33_Pyridine-Ethene.out	-78.0697	-78.4415	-78.4537	33_Pyridine-Ethene_1.00.out	-2.96109	2.91389	0.963675	-1.95021
33_Pyridine-Ethene_1.05.out	-324.86	-326.334	-326.328	1.06188		33_Pyridine-Ethene.out	-246.794	-247.888	-247.872	33_Pyridine-Ethene.out	-78.0697	-78.4415	-78.4537	33_Pyridine-Ethene_1.05.out	-1.98106	2.65497	1.11404	-1.54093
33_Pyridine-Ethene_1.10.out	-324.861	-326.334	-326.328	1.06193		33_Pyridine-Ethene.out	-246.794	-247.888	-247.872	33_Pyridine-Ethene.out	-78.0697	-78.4415	-78.4537	33_Pyridine-Ethene_1.10.out	-1.35459	2.31996	1.09637	-1.22359
33_Pyridine-Ethene_1.25.out	-324.863	-326.332	-326.327	1.06203		33_Pyridine-Ethene.out	-246.794	-247.888	-247.872	33_Pyridine-Ethene.out	-78.0697	-78.4415	-78.4537	33_Pyridine-Ethene_1.25.out	-0.519928	1.36379	0.733166	-0.630628
33_Pyridine-Ethene_1.50.out	-324.863	-326.331	-326.326	1.06212		33_Pyridine-Ethene.out	-246.794	-247.888	-247.872	33_Pyridine-Ethene.out	-78.0697	-78.4415	-78.4537	33_Pyridine-Ethene_1.50.out	-0.198884	0.493596	0.262074	-0.231521
33_Pyridine-Ethene_2.00.out	-324.863	-326.33	-326.326	1.06219		33_Pyridine-Ethene.out	-246.794	-247.888	-247.872	33_Pyridine-Ethene.out	-78.0697	-78.4415	-78.4537	33_Pyridine-Ethene_2.00.out	-0.0657072	0.0743399	0.029272	-0.0450679
34_Pentane-Pentane_0.90.out	-392.821	-394.814	-394.871	1.06116		34_Pentane-Pentane.out	-196.417	-197.404	-197.434	34_Pentane-Pentane.out	-196.417	-197.404	-197.434	34_Pentane-Pentane_0.90.out	-7.8421	3.27055	1.22955	-2.041
34_Pentane-Pentane_0.95.out	-392.826	-394.815	-394.873	1.06131		34_Pentane-Pentane.out	-196.417	-197.404	-197.434	34_Pentane-Pentane.out	-196.417	-197.404	-197.434	34_Pentane-Pentane_0.95.out	-4.9586	3.8984	2.29169	-1.60671
34_Pentane-Pentane_1.00.out	-392.829	-394.815	-394.873	1.06143		34_Pentane-Pentane.out	-196.417	-197.404	-197.434	34_Pentane-Pentane.out	-196.417	-197.404	-197.434	34_Pentane-Pentane_1.00.out	-3.14967	3.96532	2.68468	-1.28064
34_Pentane-Pentane_1.05.out	-392.831	-394.814	-394.873	1.06153		34_Pentane-Pentane.out	-196.417	-197.404	-197.434	34_Pentane-Pentane.out	-196.417	-197.404	-197.434	34_Pentane-Pentane_1.05.out	-2.00599	3.7492	2.71685	-1.03234
34_Pentane-Pentane_1.10.out	-392.832	-394.814	-394.873	1.06162		34_Pentane-Pentane.out	-196.417	-197.404	-197.434	34_Pentane-Pentane.out	-196.417	-197.404	-197.434	34_Pentane-Pentane_1.10.out	-1.28162	3.40627	2.56481	-0.841462
34_Pentane-Pentane_1.25.out	-392.833	-394.812	-394.872	1.06182		34_Pentane-Pentane.out	-196.417	-197.404	-197.434	34_Pentane-Pentane.out	-196.417	-197.404	-197.434	34_Pentane-Pentane_1.25.out	-0.340405	2.2927	1.80997	-0.482724
34_Pentane-Pentane_1.50.out	-392.834	-394.81	-394.87	1.06199		34_Pentane-Pentane.out	-196.417	-197.404	-197.434	34_Pentane-Pentane.out	-196.417	-197.404	-197.434	34_Pentane-Pentane_1.50.out	-0.0431723	1.08924	0.867364	-0.221873
34_Pentane-Pentane_2.00.out	-392.834	-394.809	-394.869	1.06208		34_Pentane-Pentane.out	-196.417	-197.404	-197.434	34_Pentane-Pentane.out	-196.417	-197.404	-197.434	34_Pentane-Pentane_2.00.out	-0.00538383	0.289279	0.225063	-0.0642162
35_Neopentane-Pentane_0.90.out	-392.825	-394.819	-394.875	1.06097		35_Neopentane-Pentane.out	-196.417	-197.404	-197.434	35_Neopentane-Pentane.out	-196.417	-197.412	-197.439	35_Neopentane-Pentane_0.90.out	-5.76753	2.07172	0.693761	-1.37796
35_Neopentane-Pentane_0.95.out	-392.828	-394.82	-394.876	1.06109		35_Neopentane-Pentane.out	-196.417	-197.404	-197.434	35_Neopentane-Pentane.out	-196.417	-197.412	-197.439	35_Neopentane-Pentane_0.95.out	-3.48318	2.61848	1.56488	-1.0536
35_Neopentane-Pentane_1.00.out	-392.831	-394.82	-394.877	1.06119		35_Neopentane-Pentane.out	-196.417	-197.404	-197.434	35_Neopentane-Pentane.out	-196.417	-197.412	-197.439	35_Neopentane-Pentane_1.00.out	-2.13259	2.68493	1.86211	-0.822813
35_Neopentane-Pentane_1.05.out	-392.832	-394.82	-394.877	1.06127		35_Neopentane-Pentane.out	-196.417	-197.404	-197.434	35_Neopentane-Pentane.out	-196.417	-197.412	-197.439	35_Neopentane-Pentane_1.05.out	-1.31818	2.52976	1.8756	-0.654155
35_Neopentane-Pentane_1.10.out	-392.833	-394.82	-394.877	1.06134		35_Neopentane-Pentane.out	-196.417	-197.404	-197.434	35_Neopentane-Pentane.out	-196.417	-197.412	-197.439	35_Neopentane-Pentane_1.10.out	-0.821803	2.28416	1.7557	-0.528463
35_Neopentane-Pentane_1.25.out	-392.834	-394.818	-394.876	1.06149		35_Neopentane-Pentane.out	-196.417	-197.404	-197.434	35_Neopentane-Pentane.out	-196.417	-197.412	-197.439	35_Neopentane-Pentane_1.25.out	-0.208206	1.51402	1.21343	-0.300593
35_Neopentane-Pentane_1.50.out	-392.834	-394.817	-394.875	1.06161		35_Neopentane-Pentane.out	-196.417	-197.404	-197.434	35_Neopentane-Pentane.out	-196.417	-197.412	-197.439	35_Neopentane-Pentane_1.50.out	-0.0272299	0.715948	0.576508	-0.13944
35_Neopentane-Pentane_2.00.out	-392.834	-394.816	-394.874	1.06168		35_Neopentane-Pentane.out	-196.417	-197.404	-197.434	35_Neopentane-Pentane.out	-196.417	-197.412	-197.439	35_Neopentane-Pentane_2.00.out	-0.00436226	0.206406	0.164422	-0.0419845
36_Neopentane-Neopentane_0.90.out	-392.829	-394.826	-394.88	1.06081		36_Neopentane-Neopentane.out	-196.417	-197.412	-197.439	36_Neopentane-Neopentane.out	-196.417	-197.412	-197.439	36_Neopentane-Neopentane_0.90.out	-3.51359	1.46675	0.675645	-0.791107
36_Neopentane-Neopentane_0.95.out	-392.831	-394.826	-394.881	1.06088		36_Neopentane-Neopentane.out	-196.417	-197.412	-197.439	36_Neopentane-Neopentane.out	-196.417	-197.412	-197.439	36_Neopentane-Neopentane_0.95.out	-2.25606	1.72074	1.09848	-0.622258
36_Neopentane-Neopentane_1.00.out	-392.832	-394.827	-394.881	1.06095		36_Neopentane-Neopentane.out	-196.417	-197.412	-197.439	36_Neopentane-Neopentane.out	-196.417	-197.412	-197.439	36_Neopentane-Neopentane_1.00.out	-1.45922	1.74711	1.24956	-0.497549
36_Neopentane-Neopentane_1.05.out	-392.833	-394.826	-394.881	1.061		36_Neopentane-Neopentane.out	-196.417	-197.412	-197.439	36_Neopentane-Neopentane.out	-196.417	-197.412	-197.439	36_Neopentane-Neopentane_1.05.out	-0.950075	1.65623	1.25266	-0.403575
36_Neopentane-Neopentane_1.10.out	-392.833	-394.826	-394.881	1.06104		36_Neopentane-Neopentane.out	-196.417	-197.412	-197.439	36_Neopentane-Neopentane.out	-196.417	-197.412	-197.439	36_Neopentane-Neopentane_1.10.out	-0.623772	1.51148	1.17976	-0.331719
36_Neopentane-Neopentane_1.25.out	-392.834	-394.825	-394.88	1.06114		36_Neopentane-Neopentane.out	-196.417	-197.412	-197.439	36_Neopentane-Neopentane.out	-196.417	-197.412	-197.439	36_Neopentane-Neopentane_1.25.out	-0.188698	1.03456	0.838491	-0.196065
36_Neopentane-Neopentane_1.50.out	-392.834	-394.825	-394.88	1.06122		36_Neopentane-Neopentane.out	-196.417	-197.412	-197.439	36_Neopentane-Neopentane.out	-196.417	-197.412	-197.439	36_Neopentane-Neopentane_1.50.out	-0.0382275	0.50537	0.411502	-0.0938673
36_Neopentane-Neopentane_2.00.out	-392.834	-394.824	-394.879	1.06127		36_Neopentane-Neopentane.out	-196.417	-197.412	-197.439	36_Neopentane-Neopentane.out	-196.417	-197.412	-197.439	36_Neopentane-Neopentane_2.00.out	-0.00785927	0.14041	0.111609	-0.0288014
37_Cyclopentane-Neopentane_0.90.out	-391.65	-393.618	-393.664	1.06095		37_Cyclopentane-Neopentane.out	-195.242	-196.203	-196.223	37_Cyclopentane-Neopentane.out	-196.417	-197.412	-197.439	37_Cyclopentane-Neopentane_0.90.out	-5.94299	1.87135	0.448883	-1.42246
37_Cyclopentane-Neopentane_0.95.out	-391.654	-393.619	-393.665	1.06108		37_Cyclopentane-Neopentane.out	-195.242	-196.203	-196.223	37_Cyclopentane-Neopentane.out	-196.417	-197.412	-197.439	37_Cyclopentane-Neopentane_0.95.out	-3.68218	2.40725	1.32005	-1.0872
37_Cyclopentane-Neopentane_1.00.out	-391.656	-393.619	-393.666	1.06118		37_Cyclopentane-Neopentane.out	-195.242	-196.203	-196.223	37_Cyclopentane-Neopentane.out	-196.417	-197.412	-197.439	37_Cyclopentane-Neopentane_1.00.out	-2.32064	2.49972	1.65049	-0.849224
37_Cyclopentane-Neopentane_1.05.out	-391.657	-393.619	-393.666	1.06126		37_Cyclopentane-Neopentane.out	-195.242	-196.203	-196.223	37_Cyclopentane-Neopentane.out	-196.417	-197.412	-197.439	37_Cyclopentane-Neopentane_1.05.out	-1.4796	2.38344	1.70819	-0.675256
37_Cyclopentane-Neopentane_1.10.out	-391.658	-393.618	-393.666	1.06132		37_Cyclopentane-Neopentane.out	-195.242	-196.203	-196.223	37_Cyclopentane-Neopentane.out	-196.417	-197.412	-197.439	37_Cyclopentane-Neopentane_1.10.out	-0.952681	2.17687	1.63141	-0.545467
37_Cyclopentane-Neopentane_1.25.out	-391.659	-393.617	-393.665	1.06146		37_Cyclopentane-Neopentane.out	-195.242	-196.203	-196.223	37_Cyclopentane-Neopentane.out	-196.417	-197.412	-197.439	37_Cyclopentane-Neopentane_1.25.out	-0.267185	1.4859	1.17587	-0.310031
37_Cyclopentane-Neopentane_1.50.out	-391.659	-393.616	-393.664	1.06157		37_Cyclopentane-Neopentane.out	-195.242	-196.203	-196.223	37_Cyclopentane-Neopentane.out	-196.417	-197.412	-197.439	37_Cyclopentane-Neopentane_1.50.out	-0.0408491	0.723304	0.579618	-0.143686
37_Cyclopentane-Neopentane_2.00.out	-391.659	-393.615	-393.663	1.06164		37_Cyclopentane-Neopentane.out	-195.242	-196.203	-196.223	37_Cyclopentane-Neopentane.out	-196.417	-197.412	-197.439	37_Cyclopentane-Neopentane_2.00.out	-0.00589068	0.199356	0.156183	-0.0431724
38_Cyclopentane-Cyclopentane_0.90.out	-390.475	-392.41	-392.448	1.06125		38_Cyclopentane-Cyclopentane.out	-195.242	-196.203	-196.223	38_Cyclopentane-Cyclopentane.out	-195.242	-196.203	-196.223	38_Cyclopentane-Cyclopentane_0.90.out	-6.20784	2.56283	0.909812	-1.65301
38_Cyclopentane-Cyclopentane_0.95.out	-390.478	-392.411	-392.45	1.06138		38_Cyclopentane-Cyclopentane.out	-195.242	-196.203	-196.223	38_Cyclopentane-Cyclopentane.out	-195.242	-196.203	-196.223	38_Cyclopentane-Cyclopentane_0.95.out	-4.02954	3.05821	1.74151	-1.3167
38_Cyclopentane-Cyclopentane_1.00.out	-390.481	-392.411	-392.45	1.06149		38_Cyclopentane-Cyclopentane.out	-195.242	-196.203	-196.223	38_Cyclopentane-Cyclopentane.out	-195.242	-196.203	-196.223	38_Cyclopentane-Cyclopentane_1.00.out	-2.49208	3.13674	2.10257	-1.03417
38_Cyclopentane-Cyclopentane_1.05.out	-390.482	-392.411	-392.45	1.06158		38_Cyclopentane-Cyclopentane.out	-195.242	-196.203	-196.223	38_Cyclopentane-Cyclopentane.out	-195.242	-196.203	-196.223	38_Cyclopentane-Cyclopentane_1.05.out	-1.52739	2.9549	2.13623	-0.818671
38_Cyclopentane-Cyclopentane_1.10.out	-390.483	-392.41	-392.45	1.06166		38_Cyclopentane-Cyclopentane.out	-195.242	-196.203	-196.223	38_Cyclopentane-Cyclopentane.out	-195.242	-196.203	-196.223	38_Cyclopentane-Cyclopentane_1.10.out	-0.944492	2.664	2.00538	-0.658618
38_Cyclopentane-Cyclopentane_1.25.out	-390.484	-392.409	-392.449	1.06182		38_Cyclopentane-Cyclopentane.out	-195.242	-196.203	-196.223	38_Cyclopentane-Cyclopentane.out	-195.242	-196.203	-196.223	38_Cyclopentane-Cyclopentane_1.25.out	-0.23311	1.75477	1.38372	-0.37105
38_Cyclopentane-Cyclopentane_1.50.out	-390.484	-392.407	-392.448	1.06195		38_Cyclopentane-Cyclopentane.out	-195.242	-196.203	-196.223	38_Cyclopentane-Cyclopentane.out	-195.242	-196.203	-196.223	38_Cyclopentane-Cyclopentane_1.50.out	-0.0281561	0.821925	0.650851	-0.171073
38_Cyclopentane-Cyclopentane_2.00.out	-390.485	-392.406	-392.447	1.06203		38_Cyclopentane-Cyclopentane.out	-195.242	-196.203	-196.223	38_Cyclopentane-Cyclopentane.out	-195.242	-196.203	-196.223	38_Cyclopentane-Cyclopentane_2.00.out	-0.00397965	0.220474	0.169639	-0.050835
39_Benzene-Cyclopentane_0.90.out	-426.024	-428.059	-428.065	1.06076		39_Benzene-Cyclopentane.out	-230.795	-231.85	-231.841	39_Benzene-Cyclopentane.out	-195.242	-196.203	-196.223	39_Benzene-Cyclopentane_0.90.out	-8.53032	3.98151	0.379423	-3.60209
39_Benzene-Cyclopentane_0.95.out	-426.029	-428.06	-428.067	1.0609		39_Benzene-Cyclopentane.out	-230.795	-231.85	-231.841	39_Benzene-Cyclopentane.out	-195.242	-196.203	-196.223	39_Benzene-Cyclopentane_0.95.out	-5.2305	4.67113	1.81525	-2.85588
39_Benzene-Cyclopentane_1.00.out	-426.032	-428.06	-428.068	1.06103		39_Benzene-Cyclopentane.out	-230.795	-231.85	-231.841	39_Benzene-Cyclopentane.out	-195.242	-196.203	-196.223	39_Benzene-Cyclopentane_1.00.out	-3.12063	4.69659	2.43379	-2.26281
39_Benzene-Cyclopentane_1.05.out	-426.035	-428.06	-428.069	1.06113		39_Benzene-Cyclopentane.out	-230.795	-231.85	-231.841	39_Benzene-Cyclopentane.out	-195.242	-196.203	-196.223	39_Benzene-Cyclopentane_1.05.out	-1.80284	4.36376	2.56933	-1.79444
39_Benzene-Cyclopentane_1.10.out	-426.036	-428.059	-428.068	1.06121		39_Benzene-Cyclopentane.out	-230.795	-231.85	-231.841	39_Benzene-Cyclopentane.out	-195.242	-196.203	-196.223	39_Benzene-Cyclopentane_1.10.out	-1.01766	3.88629	2.44988	-1.43641
39_Benzene-Cyclopentane_1.25.out	-426.037	-428.057	-428.067	1.06137		39_Benzene-Cyclopentane.out	-230.795	-231.85	-231.841	39_Benzene-Cyclopentane.out	-195.242	-196.203	-196.223	39_Benzene-Cyclopentane_1.25.out	-0.110172	2.46495	1.69217	-0.772776
39_Benzene-Cyclopentane_1.50.out	-426.038	-428.054	-428.066	1.06151		39_Benzene-Cyclopentane.out	-230.795	-231.85	-231.841	39_Benzene-Cyclopentane.out	-195.242	-196.203	-196.223	39_Benzene-Cyclopentane_1.50.out	0.0785194	1.06958	0.759033	-0.310547
39_Benzene-Cyclopentane_2.00.out	-426.037	-428.053	-428.065	1.06159		39_Benzene-Cyclopentane.out	-230.795	-231.85	-231.841	39_Benzene-Cyclopentane.out	-195.242	-196.203	-196.223	39_Benzene-Cyclopentane_2.00.out	0.0343791	0.235465	0.168049	-0.0674165
40_Benzene-Neopentane_0.90.out	-427.202	-429.267	-429.281	1.06058		40_Benzene-Neopentane.out	-230.795	-231.85	-231.841	40_Benzene-Neopentane.out	-196.417	-197.412	-197.439	40_Benzene-Neopentane_0.90.out	-6.35392	3.15343	0.517104	-2.63633
40_Benzene-Neopentane_0.95.out	-427.206	-429.267	-429.283	1.0607		40_Benzene-Neopentane.out	-230.795	-231.85	-231.841	40_Benzene-Neopentane.out	-196.417	-197.412	-197.439	40_Benzene-Neopentane_0.95.out	-3.79022	3.68451	1.60411	-2.0804
40_Benzene-Neopentane_1.00.out	-427.209	-429.267	-429.284	1.0608		40_Benzene-Neopentane.out	-230.795	-231.85	-231.841	40_Benzene-Neopentane.out	-196.417	-197.412	-197.439	40_Benzene-Neopentane_1.00.out	-2.21996	3.69527	2.04051	-1.65476
40_Benzene-Neopentane_1.05.out	-427.21	-429.267	-429.284	1.06087		40_Benzene-Neopentane.out	-230.795	-231.85	-231.841	40_Benzene-Neopentane.out	-196.417	-197.412	-197.439	40_Benzene-Neopentane_1.05.out	-1.25995	3.44837	2.12279	-1.32558
40_Benzene-Neopentane_1.10.out	-427.211	-429.266	-429.284	1.06093		40_Benzene-Neopentane.out	-230.795	-231.85	-231.841	40_Benzene-Neopentane.out	-196.417	-197.412	-197.439	40_Benzene-Neopentane_1.10.out	-0.678312	3.09244	2.02284	-1.06959
40_Benzene-Neopentane_1.25.out	-427.212	-429.265	-429.283	1.06105		40_Benzene-Neopentane.out	-230.795	-231.85	-231.841	40_Benzene-Neopentane.out	-196.417	-197.412	-197.439	40_Benzene-Neopentane_1.25.out	-0.00442056	2.00236	1.41825	-0.584106
40_Benzene-Neopentane_1.50.out	-427.212	-429.263	-429.282	1.06115		40_Benzene-Neopentane.out	-230.795	-231.85	-231.841	40_Benzene-Neopentane.out	-196.417	-197.412	-197.439	40_Benzene-Neopentane_1.50.out	0.109446	0.901992	0.660884	-0.241108
40_Benzene-Neopentane_2.00.out	-427.212	-429.262	-429.281	1.06122		40_Benzene-Neopentane.out	-230.795	-231.85	-231.841	40_Benzene-Neopentane.out	-196.417	-197.412	-197.439	40_Benzene-Neopentane_2.00.out	0.0455775	0.228603	0.168877	-0.0597263
41_Uracil-Pentane_0.90.out	-609.055	-611.724	-611.709	1.06636		41_Uracil-Pentane.out	-412.652	-414.312	-414.271	41_Uracil-Pentane.out	-196.417	-197.404	-197.434	41_Uracil-Pentane_0.90.out	-8.22953	4.95138	1.85122	-3.10016
41_Uracil-Pentane_0.95.out	-609.06	-611.725	-611.711	1.06649		41_Uracil-Pentane.out	-412.652	-414.312	-414.271	41_Uracil-Pentane.out	-196.417	-197.404	-197.434	41_Uracil-Pentane_0.95.out	-5.05091	5.55718	3.07514	-2.48204
41_Uracil-Pentane_1.00.out	-609.063	-611.725	-611.711	1.06659		41_Uracil-Pentane.out	-412.652	-414.312	-414.271	41_Uracil-Pentane.out	-196.417	-197.404	-197.434	41_Uracil-Pentane_1.00.out	-3.05188	5.51504	3.51621	-1.99883
41_Uracil-Pentane_1.05.out	-609.065	-611.724	-611.711	1.06668		41_Uracil-Pentane.out	-412.652	-414.312	-414.271	41_Uracil-Pentane.out	-196.417	-197.404	-197.434	41_Uracil-Pentane_1.05.out	-1.79922	5.13632	3.51875	-1.61756
41_Uracil-Pentane_1.10.out	-609.067	-611.723	-611.711	1.06677		41_Uracil-Pentane.out	-412.652	-414.312	-414.271	41_Uracil-Pentane.out	-196.417	-197.404	-197.434	41_Uracil-Pentane_1.10.out	-0.911584	4.49442	3.23032	-1.26411
41_Uracil-Pentane_1.25.out	-609.068	-611.72	-611.709	1.06694		41_Uracil-Pentane.out	-412.652	-414.312	-414.271	41_Uracil-Pentane.out	-196.417	-197.404	-197.434	41_Uracil-Pentane_1.25.out	-0.037635	2.66357	2.01785	-0.64572
41_Uracil-Pentane_1.50.out	-609.068	-611.718	-611.707	1.06707		41_Uracil-Pentane.out	-412.652	-414.312	-414.271	41_Uracil-Pentane.out	-196.417	-197.404	-197.434	41_Uracil-Pentane_1.50.out	0.0655779	1.07725	0.822381	-0.254866
41_Uracil-Pentane_2.00.out	-609.068	-611.716	-611.706	1.06714		41_Uracil-Pentane.out	-412.652	-414.312	-414.271	41_Uracil-Pentane.out	-196.417	-197.404	-197.434	41_Uracil-Pentane_2.00.out	0.0183804	0.244271	0.183423	-0.0608482
42_Uracil-Cyclopentane_0.90.out	-607.881	-610.521	-610.497	1.06647		42_Uracil-Cyclopentane.out	-412.652	-414.312	-414.271	42_Uracil-Cyclopentane.out	-195.242	-196.203	-196.223	42_Uracil-Cyclopentane_0.90.out	-7.93715	4.14235	1.22838	-2.91398
42_Uracil-Cyclopentane_0.95.out	-607.886	-610.522	-610.499	1.0666		42_Uracil-Cyclopentane.out	-412.652	-414.312	-414.271	42_Uracil-Cyclopentane.out	-195.242	-196.203	-196.223	42_Uracil-Cyclopentane_0.95.out	-4.75583	4.79191	2.50049	-2.29141
42_Uracil-Cyclopentane_1.00.out	-607.889	-610.522	-610.499	1.0667		42_Uracil-Cyclopentane.out	-412.652	-414.312	-414.271	42_Uracil-Cyclopentane.out	-195.242	-196.203	-196.223	42_Uracil-Cyclopentane_1.00.out	-2.83294	4.76666	2.94692	-1.81975
42_Uracil-Cyclopentane_1.05.out	-607.891	-610.522	-610.499	1.06678		42_Uracil-Cyclopentane.out	-412.652	-414.312	-414.271	42_Uracil-Cyclopentane.out	-195.242	-196.203	-196.223	42_Uracil-Cyclopentane_1.05.out	-1.66861	4.41789	2.95983	-1.45807
42_Uracil-Cyclopentane_1.10.out	-607.892	-610.521	-610.499	1.06685		42_Uracil-Cyclopentane.out	-412.652	-414.312	-414.271	42_Uracil-Cyclopentane.out	-195.242	-196.203	-196.223	42_Uracil-Cyclopentane_1.10.out	-0.966631	3.93969	2.76094	-1.17875
42_Uracil-Cyclopentane_1.25.out	-607.894	-610.519	-610.498	1.067		42_Uracil-Cyclopentane.out	-412.652	-414.312	-414.271	42_Uracil-Cyclopentane.out	-195.242	-196.203	-196.223	42_Uracil-Cyclopentane_1.25.out	-0.142005	2.52227	1.86965	-0.652618
42_Uracil-Cyclopentane_1.50.out	-607.894	-610.517	-610.496	1.06711		42_Uracil-Cyclopentane.out	-412.652	-414.312	-414.271	42_Uracil-Cyclopentane.out	-195.242	-196.203	-196.223	42_Uracil-Cyclopentane_1.50.out	0.045494	1.12631	0.848752	-0.277557
42_Uracil-Cyclopentane_2.00.out	-607.894	-610.515	-610.495	1.06719		42_Uracil-Cyclopentane.out	-412.652	-414.312	-414.271	42_Uracil-Cyclopentane.out	-195.242	-196.203	-196.223	42_Uracil-Cyclopentane_2.00.out	0.0299501	0.284143	0.21379	-0.0703537
43_Uracil-Neopentane_0.90.out	-609.059	-611.729	-611.713	1.06627		43_Uracil-Neopentane.out	-412.651	-414.312	-414.271	43_Uracil-Neopentane.out	-196.417	-197.412	-197.439	43_Uracil-Neopentane_0.90.out	-5.67589	3.55997	1.47115	-2.08881
43_Uracil-Neopentane_0.95.out	-609.063	-611.73	-611.715	1.06637		43_Uracil-Neopentane.out	-412.651	-414.312	-414.271	43_Uracil-Neopentane.out	-196.417	-197.412	-197.439	43_Uracil-Neopentane_0.95.out	-3.16292	4.11979	2.47715	-1.64264
43_Uracil-Neopentane_1.00.out	-609.066	-611.73	-611.715	1.06645		43_Uracil-Neopentane.out	-412.651	-414.312	-414.271	43_Uracil-Neopentane.out	-196.417	-197.412	-197.439	43_Uracil-Neopentane_1.00.out	-1.68513	4.10078	2.79545	-1.30532
43_Uracil-Neopentane_1.05.out	-609.067	-611.73	-611.715	1.06651		43_Uracil-Neopentane.out	-412.651	-414.312	-414.271	43_Uracil-Neopentane.out	-196.417	-197.412	-197.439	43_Uracil-Neopentane_1.05.out	-0.821577	3.80567	2.75883	-1.04684
43_Uracil-Neopentane_1.10.out	-609.068	-611.729	-611.715	1.06656		43_Uracil-Neopentane.out	-412.651	-414.312	-414.271	43_Uracil-Neopentane.out	-196.417	-197.412	-197.439	43_Uracil-Neopentane_1.10.out	-0.325514	3.40007	2.55305	-0.847016
43_Uracil-Neopentane_1.25.out	-609.069	-611.727	-611.713	1.06667		43_Uracil-Neopentane.out	-412.651	-414.312	-414.271	43_Uracil-Neopentane.out	-196.417	-197.412	-197.439	43_Uracil-Neopentane_1.25.out	0.17594	2.19444	1.72471	-0.469728
43_Uracil-Neopentane_1.50.out	-609.069	-611.725	-611.712	1.06676		43_Uracil-Neopentane.out	-412.651	-414.312	-414.271	43_Uracil-Neopentane.out	-196.417	-197.412	-197.439	43_Uracil-Neopentane_1.50.out	0.177477	0.994894	0.794848	-0.200046
43_Uracil-Neopentane_2.00.out	-609.069	-611.724	-611.711	1.06681		43_Uracil-Neopentane.out	-412.651	-414.312	-414.271	43_Uracil-Neopentane.out	-196.417	-197.412	-197.439	43_Uracil-Neopentane_2.00.out	0.0616558	0.255325	0.20411	-0.0512149
44_Ethene-Pentane_0.90.out	-274.481	-275.849	-275.889	1.06139		44_Ethene-Pentane.out	-78.0697	-78.4415	-78.4537	44_Ethene-Pentane.out	-196.417	-197.404	-197.434	44_Ethene-Pentane_0.90.out	-3.79653	1.93501	0.811129	-1.12388
44_Ethene-Pentane_0.95.out	-274.483	-275.849	-275.89	1.06149		44_Ethene-Pentane.out	-78.0697	-78.4415	-78.4537	44_Ethene-Pentane.out	-196.417	-197.404	-197.434	44_Ethene-Pentane_0.95.out	-2.35093	2.16583	1.28997	-0.875863
44_Ethene-Pentane_1.00.out	-274.484	-275.849	-275.89	1.06157		44_Ethene-Pentane.out	-78.0697	-78.4415	-78.4537	44_Ethene-Pentane.out	-196.417	-197.404	-197.434	44_Ethene-Pentane_1.00.out	-1.45958	2.12955	1.43795	-0.691607
44_Ethene-Pentane_1.05.out	-274.485	-275.849	-275.89	1.06164		44_Ethene-Pentane.out	-78.0697	-78.4415	-78.4537	44_Ethene-Pentane.out	-196.417	-197.404	-197.434	44_Ethene-Pentane_1.05.out	-0.905816	1.96708	1.41455	-0.552524
44_Ethene-Pentane_1.10.out	-274.486	-275.849	-275.89	1.0617		44_Ethene-Pentane.out	-78.0697	-78.4415	-78.4537	44_Ethene-Pentane.out	-196.417	-197.404	-197.434	44_Ethene-Pentane_1.10.out	-0.561254	1.7553	1.30892	-0.446377
44_Ethene-Pentane_1.25.out	-274.486	-275.848	-275.89	1.06182		44_Ethene-Pentane.out	-78.0697	-78.4415	-78.4537	44_Ethene-Pentane.out	-196.417	-197.404	-197.434	44_Ethene-Pentane_1.25.out	-0.128018	1.13669	0.887594	-0.249092
44_Ethene-Pentane_1.50.out	-274.487	-275.847	-275.889	1.06193		44_Ethene-Pentane.out	-78.0697	-78.4415	-78.4537	44_Ethene-Pentane.out	-196.417	-197.404	-197.434	44_Ethene-Pentane_1.50.out	-0.00402278	0.518268	0.409251	-0.109017
44_Ethene-Pentane_2.00.out	-274.487	-275.846	-275.888	1.06199		44_Ethene-Pentane.out	-78.0697	-78.4415	-78.4537	44_Ethene-Pentane.out	-196.417	-197.404	-197.434	44_Ethene-Pentane_2.00.out	0.00358325	0.131477	0.102371	-0.0291067
45_Ethyne-Pentane_0.90.out	-273.264	-274.606	-274.634	1.06131		45_Ethyne-Pentane.out	-76.8538	-77.1989	-77.1991	45_Ethyne-Pentane.out	-196.417	-197.404	-197.434	45_Ethyne-Pentane_0.90.out	-4.14299	1.8477	0.312286	-1.53541
45_Ethyne-Pentane_0.95.out	-273.267	-274.606	-274.635	1.0614		45_Ethyne-Pentane.out	-76.8538	-77.1989	-77.1991	45_Ethyne-Pentane.out	-196.417	-197.404	-197.434	45_Ethyne-Pentane_0.95.out	-2.4639	2.18295	0.987109	-1.19584
45_Ethyne-Pentane_1.00.out	-273.268	-274.606	-274.636	1.06147		45_Ethyne-Pentane.out	-76.8538	-77.1989	-77.1991	45_Ethyne-Pentane.out	-196.417	-197.404	-197.434	45_Ethyne-Pentane_1.00.out	-1.44487	2.18293	1.2431	-0.939832
45_Ethyne-Pentane_1.05.out	-273.269	-274.606	-274.636	1.06153		45_Ethyne-Pentane.out	-76.8538	-77.1989	-77.1991	45_Ethyne-Pentane.out	-196.417	-197.404	-197.434	45_Ethyne-Pentane_1.05.out	-0.826131	2.0231	1.2784	-0.7447
45_Ethyne-Pentane_1.10.out	-273.27	-274.606	-274.635	1.06157		45_Ethyne-Pentane.out	-76.8538	-77.1989	-77.1991	45_Ethyne-Pentane.out	-196.417	-197.404	-197.434	45_Ethyne-Pentane_1.10.out	-0.452669	1.79949	1.2046	-0.594886
45_Ethyne-Pentane_1.25.out	-273.271	-274.605	-274.635	1.06166		45_Ethyne-Pentane.out	-76.8538	-77.1989	-77.1991	45_Ethyne-Pentane.out	-196.417	-197.404	-197.434	45_Ethyne-Pentane_1.25.out	-0.019153	1.13556	0.819135	-0.316422
45_Ethyne-Pentane_1.50.out	-273.271	-274.604	-274.634	1.06171		45_Ethyne-Pentane.out	-76.8538	-77.1989	-77.1991	45_Ethyne-Pentane.out	-196.417	-197.404	-197.434	45_Ethyne-Pentane_1.50.out	0.0611477	0.493673	0.367558	-0.126115
45_Ethyne-Pentane_2.00.out	-273.271	-274.603	-274.634	1.06174		45_Ethyne-Pentane.out	-76.8538	-77.1989	-77.1991	45_Ethyne-Pentane.out	-196.417	-197.404	-197.434	45_Ethyne-Pentane_2.00.out	0.0275958	0.11772	0.0894139	-0.0283064
46_Peptide-Pentane_0.90.out	-443.527	-445.596	-445.622	1.06476		46_Peptide-Pentane.out	-247.119	-248.185	-248.184	46_Peptide-Pentane.out	-196.417	-197.404	-197.434	46_Peptide-Pentane_0.90.out	-5.75009	4.22542	2.24774	-1.97767
46_Peptide-Pentane_0.95.out	-443.53	-445.597	-445.623	1.06487		46_Peptide-Pentane.out	-247.119	-248.185	-248.184	46_Peptide-Pentane.out	-196.417	-197.404	-197.434	46_Peptide-Pentane_0.95.out	-3.66619	4.5604	2.94104	-1.61936
46_Peptide-Pentane_1.00.out	-443.532	-445.597	-445.623	1.06496		46_Peptide-Pentane.out	-247.119	-248.185	-248.184	46_Peptide-Pentane.out	-196.417	-197.404	-197.434	46_Peptide-Pentane_1.00.out	-2.28956	4.51439	3.18104	-1.33335
46_Peptide-Pentane_1.05.out	-443.534	-445.596	-445.623	1.06504		46_Peptide-Pentane.out	-247.119	-248.185	-248.184	46_Peptide-Pentane.out	-196.417	-197.404	-197.434	46_Peptide-Pentane_1.05.out	-1.38489	4.25727	3.15366	-1.10361
46_Peptide-Pentane_1.10.out	-443.535	-445.596	-445.623	1.06511		46_Peptide-Pentane.out	-247.119	-248.185	-248.184	46_Peptide-Pentane.out	-196.417	-197.404	-197.434	46_Peptide-Pentane_1.10.out	-0.797464	3.89651	2.97779	-0.918725
46_Peptide-Pentane_1.25.out	-443.536	-445.594	-445.622	1.06526		46_Peptide-Pentane.out	-247.119	-248.185	-248.184	46_Peptide-Pentane.out	-196.417	-197.404	-197.434	46_Peptide-Pentane_1.25.out	-0.034942	2.7226	2.17501	-0.547598
46_Peptide-Pentane_1.50.out	-443.536	-445.591	-445.62	1.06542		46_Peptide-Pentane.out	-247.119	-248.185	-248.184	46_Peptide-Pentane.out	-196.417	-197.404	-197.434	46_Peptide-Pentane_1.50.out	0.136382	1.23794	1.0067	-0.231239
46_Peptide-Pentane_2.00.out	-443.536	-445.59	-445.618	1.06552		46_Peptide-Pentane.out	-247.119	-248.185	-248.184	46_Peptide-Pentane.out	-196.417	-197.404	-197.434	46_Peptide-Pentane_2.00.out	0.0545073	0.306675	0.247991	-0.058684
47_Benzene-Benzene_TS_0.90.out	-461.581	-463.705	-463.683	1.06066		47_Benzene-Benzene_TS.out	-230.795	-231.85	-231.841	47_Benzene-Benzene_TS.out	-230.795	-231.85	-231.841	47_Benzene-Benzene_TS_0.90.out	-5.77533	3.27391	0.388008	-2.8859
47_Benzene-Benzene_TS_0.95.out	-461.585	-463.706	-463.685	1.06076		47_Benzene-Benzene_TS.out	-230.795	-231.85	-231.841	47_Benzene-Benzene_TS.out	-230.795	-231.85	-231.841	47_Benzene-Benzene_TS_0.95.out	-3.23246	3.85108	1.58226	-2.26881
47_Benzene-Benzene_TS_1.00.out	-461.588	-463.706	-463.685	1.06084		47_Benzene-Benzene_TS.out	-230.795	-231.85	-231.841	47_Benzene-Benzene_TS.out	-230.795	-231.85	-231.841	47_Benzene-Benzene_TS_1.00.out	-1.71165	3.87369	2.07419	-1.7995
47_Benzene-Benzene_TS_1.05.out	-461.589	-463.705	-463.686	1.0609		47_Benzene-Benzene_TS.out	-230.795	-231.85	-231.841	47_Benzene-Benzene_TS.out	-230.795	-231.85	-231.841	47_Benzene-Benzene_TS_1.05.out	-0.808172	3.62443	2.1859	-1.43853
47_Benzene-Benzene_TS_1.10.out	-461.59	-463.705	-463.685	1.06094		47_Benzene-Benzene_TS.out	-230.795	-231.85	-231.841	47_Benzene-Benzene_TS.out	-230.795	-231.85	-231.841	47_Benzene-Benzene_TS_1.10.out	-0.280798	3.26036	2.10126	-1.1591
47_Benzene-Benzene_TS_1.25.out	-461.591	-463.703	-463.685	1.06104		47_Benzene-Benzene_TS.out	-230.795	-231.85	-231.841	47_Benzene-Benzene_TS.out	-230.795	-231.85	-231.841	47_Benzene-Benzene_TS_1.25.out	0.2654	2.13915	1.50614	-0.633012
47_Benzene-Benzene_TS_1.50.out	-461.591	-463.701	-463.683	1.06113		47_Benzene-Benzene_TS.out	-230.795	-231.85	-231.841	47_Benzene-Benzene_TS.out	-230.795	-231.85	-231.841	47_Benzene-Benzene_TS_1.50.out	0.263017	0.997358	0.733916	-0.263442
47_Benzene-Benzene_TS_2.00.out	-461.591	-463.7	-463.682	1.06118		47_Benzene-Benzene_TS.out	-230.795	-231.85	-231.841	47_Benzene-Benzene_TS.out	-230.795	-231.85	-231.841	47_Benzene-Benzene_TS_2.00.out	0.107181	0.276472	0.209475	-0.0669967
48_Pyridine-Pyridine_TS_0.90.out	-493.58	-495.783	-495.747	1.06192		48_Pyridine-Pyridine_TS.out	-246.794	-247.888	-247.872	48_Pyridine-Pyridine_TS.out	-246.794	-247.888	-247.872	48_Pyridine-Pyridine_TS_0.90.out	-4.50474	4.0131	1.33295	-2.68015
48_Pyridine-Pyridine_TS_0.95.out	-493.583	-495.784	-495.748	1.06199		48_Pyridine-Pyridine_TS.out	-246.794	-247.888	-247.872	48_Pyridine-Pyridine_TS.out	-246.794	-247.888	-247.872	48_Pyridine-Pyridine_TS_0.95.out	-2.31831	4.48795	2.33988	-2.14807
48_Pyridine-Pyridine_TS_1.00.out	-493.586	-495.784	-495.749	1.06205		48_Pyridine-Pyridine_TS.out	-246.794	-247.888	-247.872	48_Pyridine-Pyridine_TS.out	-246.794	-247.888	-247.872	48_Pyridine-Pyridine_TS_1.00.out	-0.985505	4.4818	2.74751	-1.73429
48_Pyridine-Pyridine_TS_1.05.out	-493.587	-495.784	-495.749	1.0621		48_Pyridine-Pyridine_TS.out	-246.794	-247.888	-247.872	48_Pyridine-Pyridine_TS.out	-246.794	-247.888	-247.872	48_Pyridine-Pyridine_TS_1.05.out	-0.187461	4.22488	2.81537	-1.4095
48_Pyridine-Pyridine_TS_1.10.out	-493.588	-495.783	-495.749	1.06214		48_Pyridine-Pyridine_TS.out	-246.794	-247.888	-247.872	48_Pyridine-Pyridine_TS.out	-246.794	-247.888	-247.872	48_Pyridine-Pyridine_TS_1.10.out	0.274408	3.85326	2.69991	-1.15335
48_Pyridine-Pyridine_TS_1.25.out	-493.588	-495.781	-495.748	1.06222		48_Pyridine-Pyridine_TS.out	-246.794	-247.888	-247.872	48_Pyridine-Pyridine_TS.out	-246.794	-247.888	-247.872	48_Pyridine-Pyridine_TS_1.25.out	0.701942	2.66837	2.01219	-0.656181
48_Pyridine-Pyridine_TS_1.50.out	-493.588	-495.779	-495.746	1.06229		48_Pyridine-Pyridine_TS.out	-246.794	-247.888	-247.872	48_Pyridine-Pyridine_TS.out	-246.794	-247.888	-247.872	48_Pyridine-Pyridine_TS_1.50.out	0.558978	1.36109	1.07306	-0.28803
48_Pyridine-Pyridine_TS_2.00.out	-493.588	-495.778	-495.745	1.06234		48_Pyridine-Pyridine_TS.out	-246.794	-247.888	-247.872	48_Pyridine-Pyridine_TS.out	-246.794	-247.888	-247.872	48_Pyridine-Pyridine_TS_2.00.out	0.244647	0.433156	0.355034	-0.0781223
49_Benzene-Pyridine_TS_0.90.out	-477.58	-479.744	-479.715	1.06127		49_Benzene-Pyridine_TS.out	-230.795	-231.85	-231.841	49_Benzene-Pyridine_TS.out	-246.794	-247.888	-247.872	49_Benzene-Pyridine_TS_0.90.out	-5.20165	3.65573	0.866396	-2.78933
49_Benzene-Pyridine_TS_0.95.out	-477.585	-479.745	-479.717	1.06136		49_Benzene-Pyridine_TS.out	-230.795	-231.85	-231.841	49_Benzene-Pyridine_TS.out	-246.794	-247.888	-247.872	49_Benzene-Pyridine_TS_0.95.out	-2.65397	4.26634	2.07554	-2.1908
49_Benzene-Pyridine_TS_1.00.out	-477.587	-479.745	-479.717	1.06144		49_Benzene-Pyridine_TS.out	-230.795	-231.85	-231.841	49_Benzene-Pyridine_TS.out	-246.794	-247.888	-247.872	49_Benzene-Pyridine_TS_1.00.out	-1.14796	4.29522	2.55976	-1.73546
49_Benzene-Pyridine_TS_1.05.out	-477.588	-479.745	-479.718	1.0615		49_Benzene-Pyridine_TS.out	-230.795	-231.85	-231.841	49_Benzene-Pyridine_TS.out	-246.794	-247.888	-247.872	49_Benzene-Pyridine_TS_1.05.out	-0.271007	4.03624	2.65081	-1.38543
49_Benzene-Pyridine_TS_1.10.out	-477.589	-479.744	-479.717	1.06154		49_Benzene-Pyridine_TS.out	-230.795	-231.85	-231.841	49_Benzene-Pyridine_TS.out	-246.794	-247.888	-247.872	49_Benzene-Pyridine_TS_1.10.out	0.224065	3.65366	2.53899	-1.11466
49_Benzene-Pyridine_TS_1.25.out	-477.59	-479.742	-479.716	1.06164		49_Benzene-Pyridine_TS.out	-230.795	-231.85	-231.841	49_Benzene-Pyridine_TS.out	-246.794	-247.888	-247.872	49_Benzene-Pyridine_TS_1.25.out	0.668613	2.46042	1.85475	-0.60567
49_Benzene-Pyridine_TS_1.50.out	-477.59	-479.74	-479.715	1.06172		49_Benzene-Pyridine_TS.out	-230.795	-231.85	-231.841	49_Benzene-Pyridine_TS.out	-246.794	-247.888	-247.872	49_Benzene-Pyridine_TS_1.50.out	0.533833	1.2162	0.966382	-0.249822
49_Benzene-Pyridine_TS_2.00.out	-477.589	-479.739	-479.714	1.06177		49_Benzene-Pyridine_TS.out	-230.795	-231.85	-231.841	49_Benzene-Pyridine_TS.out	-246.794	-247.888	-247.872	49_Benzene-Pyridine_TS_2.00.out	0.240278	0.387721	0.324387	-0.0633339
50_Benzene-Ethyne_CH-pi_0.90.out	-307.644	-309.053	-309.042	1.06062		50_Benzene-Ethyne_CH-pi.out	-230.795	-231.85	-231.841	50_Benzene-Ethyne_CH-pi.out	-76.8537	-77.1988	-77.1991	50_Benzene-Ethyne_CH-pi_0.90.out	-2.75848	2.98856	1.12323	-1.86533
50_Benzene-Ethyne_CH-pi_0.95.out	-307.647	-309.054	-309.043	1.06071		50_Benzene-Ethyne_CH-pi.out	-230.795	-231.85	-231.841	50_Benzene-Ethyne_CH-pi.out	-76.8537	-77.1988	-77.1991	50_Benzene-Ethyne_CH-pi_0.95.out	-0.895373	3.51154	2.06958	-1.44196
50_Benzene-Ethyne_CH-pi_1.00.out	-307.649	-309.054	-309.044	1.06078		50_Benzene-Ethyne_CH-pi.out	-230.795	-231.85	-231.841	50_Benzene-Ethyne_CH-pi.out	-76.8537	-77.1988	-77.1991	50_Benzene-Ethyne_CH-pi_1.00.out	0.143838	3.54253	2.41824	-1.12429
50_Benzene-Ethyne_CH-pi_1.05.out	-307.65	-309.054	-309.044	1.06083		50_Benzene-Ethyne_CH-pi.out	-230.795	-231.85	-231.841	50_Benzene-Ethyne_CH-pi.out	-76.8537	-77.1988	-77.1991	50_Benzene-Ethyne_CH-pi_1.05.out	0.695603	3.33034	2.44693	-0.88341
50_Benzene-Ethyne_CH-pi_1.10.out	-307.65	-309.053	-309.044	1.06087		50_Benzene-Ethyne_CH-pi.out	-230.795	-231.85	-231.841	50_Benzene-Ethyne_CH-pi.out	-76.8537	-77.1988	-77.1991	50_Benzene-Ethyne_CH-pi_1.10.out	0.960273	3.01384	2.31426	-0.699578
50_Benzene-Ethyne_CH-pi_1.25.out	-307.65	-309.052	-309.043	1.06094		50_Benzene-Ethyne_CH-pi.out	-230.795	-231.85	-231.841	50_Benzene-Ethyne_CH-pi.out	-76.8537	-77.1988	-77.1991	50_Benzene-Ethyne_CH-pi_1.25.out	1.02448	2.02432	1.66187	-0.362443
50_Benzene-Ethyne_CH-pi_1.50.out	-307.65	-309.05	-309.042	1.06101		50_Benzene-Ethyne_CH-pi.out	-230.795	-231.85	-231.841	50_Benzene-Ethyne_CH-pi.out	-76.8537	-77.1988	-77.1991	50_Benzene-Ethyne_CH-pi_1.50.out	0.661521	0.993926	0.855702	-0.138224
50_Benzene-Ethyne_CH-pi_2.00.out	-307.649	-309.049	-309.041	1.06105		50_Benzene-Ethyne_CH-pi.out	-230.795	-231.85	-231.841	50_Benzene-Ethyne_CH-pi.out	-76.8537	-77.1988	-77.1991	50_Benzene-Ethyne_CH-pi_2.00.out	0.248709	0.303456	0.272321	-0.0311347
51_Ethyne-Ethyne_TS_0.90.out	-153.707	-154.4	-154.4	1.06049		51_Ethyne-Ethyne_TS.out	-76.8538	-77.1989	-77.1991	51_Ethyne-Ethyne_TS.out	-76.8537	-77.1988	-77.1991	51_Ethyne-Ethyne_TS_0.90.out	-0.442098	1.51515	0.957929	-0.557221
51_Ethyne-Ethyne_TS_0.95.out	-153.708	-154.4	-154.4	1.06054		51_Ethyne-Ethyne_TS.out	-76.8538	-77.1989	-77.1991	51_Ethyne-Ethyne_TS.out	-76.8537	-77.1988	-77.1991	51_Ethyne-Ethyne_TS_0.95.out	0.210313	1.71482	1.28048	-0.434348
51_Ethyne-Ethyne_TS_1.00.out	-153.708	-154.4	-154.4	1.06058		51_Ethyne-Ethyne_TS.out	-76.8538	-77.1989	-77.1991	51_Ethyne-Ethyne_TS.out	-76.8537	-77.1988	-77.1991	51_Ethyne-Ethyne_TS_1.00.out	0.561523	1.72068	1.38005	-0.340623
51_Ethyne-Ethyne_TS_1.05.out	-153.709	-154.4	-154.4	1.0606		51_Ethyne-Ethyne_TS.out	-76.8538	-77.1989	-77.1991	51_Ethyne-Ethyne_TS.out	-76.8537	-77.1988	-77.1991	51_Ethyne-Ethyne_TS_1.05.out	0.728787	1.6241	1.35526	-0.268838
51_Ethyne-Ethyne_TS_1.10.out	-153.709	-154.4	-154.4	1.06062		51_Ethyne-Ethyne_TS.out	-76.8538	-77.1989	-77.1991	51_Ethyne-Ethyne_TS.out	-76.8537	-77.1988	-77.1991	51_Ethyne-Ethyne_TS_1.10.out	0.785962	1.47989	1.26614	-0.213752
51_Ethyne-Ethyne_TS_1.25.out	-153.709	-154.399	-154.4	1.06065		51_Ethyne-Ethyne_TS.out	-76.8538	-77.1989	-77.1991	51_Ethyne-Ethyne_TS.out	-76.8537	-77.1988	-77.1991	51_Ethyne-Ethyne_TS_1.25.out	0.683725	1.01446	0.902137	-0.112327
51_Ethyne-Ethyne_TS_1.50.out	-153.708	-154.399	-154.399	1.06067		51_Ethyne-Ethyne_TS.out	-76.8538	-77.1989	-77.1991	51_Ethyne-Ethyne_TS.out	-76.8537	-77.1988	-77.1991	51_Ethyne-Ethyne_TS_1.50.out	0.397273	0.505027	0.460387	-0.0446396
51_Ethyne-Ethyne_TS_2.00.out	-153.708	-154.398	-154.398	1.06068		51_Ethyne-Ethyne_TS.out	-76.8538	-77.1989	-77.1991	51_Ethyne-Ethyne_TS.out	-76.8537	-77.1988	-77.1991	51_Ethyne-Ethyne_TS_2.00.out	0.133295	0.144342	0.136052	-0.00829011
52_Benzene-AcOH_OH-pi_0.90.out	-458.713	-460.685	-460.661	1.06673		52_Benzene-AcOH_OH-pi.out	-230.795	-231.85	-231.841	52_Benzene-AcOH_OH-pi.out	-227.921	-228.828	-228.816	52_Benzene-AcOH_OH-pi_0.90.out	-1.95321	4.93687	2.99345	-1.94342
52_Benzene-AcOH_OH-pi_0.95.out	-458.716	-460.686	-460.663	1.06681		52_Benzene-AcOH_OH-pi.out	-230.795	-231.85	-231.841	52_Benzene-AcOH_OH-pi.out	-227.921	-228.828	-228.816	52_Benzene-AcOH_OH-pi_0.95.out	-0.200166	5.34819	3.78304	-1.56515
52_Benzene-AcOH_OH-pi_1.00.out	-458.717	-460.686	-460.663	1.06687		52_Benzene-AcOH_OH-pi.out	-230.795	-231.85	-231.841	52_Benzene-AcOH_OH-pi.out	-227.921	-228.828	-228.816	52_Benzene-AcOH_OH-pi_1.00.out	0.835855	5.3201	4.05266	-1.26744
52_Benzene-AcOH_OH-pi_1.05.out	-458.718	-460.685	-460.663	1.06692		52_Benzene-AcOH_OH-pi.out	-230.795	-231.85	-231.841	52_Benzene-AcOH_OH-pi.out	-227.921	-228.828	-228.816	52_Benzene-AcOH_OH-pi_1.05.out	1.41433	5.0496	4.01817	-1.03143
52_Benzene-AcOH_OH-pi_1.10.out	-458.719	-460.685	-460.663	1.06697		52_Benzene-AcOH_OH-pi.out	-230.795	-231.85	-231.841	52_Benzene-AcOH_OH-pi.out	-227.921	-228.828	-228.816	52_Benzene-AcOH_OH-pi_1.10.out	1.70202	4.6592	3.81541	-0.84379
52_Benzene-AcOH_OH-pi_1.25.out	-458.719	-460.683	-460.661	1.06706		52_Benzene-AcOH_OH-pi.out	-230.795	-231.85	-231.841	52_Benzene-AcOH_OH-pi.out	-227.921	-228.828	-228.816	52_Benzene-AcOH_OH-pi_1.25.out	1.74156	3.3645	2.88896	-0.475544
52_Benzene-AcOH_OH-pi_1.50.out	-458.718	-460.68	-460.659	1.06714		52_Benzene-AcOH_OH-pi.out	-230.795	-231.85	-231.841	52_Benzene-AcOH_OH-pi.out	-227.921	-228.828	-228.816	52_Benzene-AcOH_OH-pi_1.50.out	1.1736	1.81313	1.61201	-0.201124
52_Benzene-AcOH_OH-pi_2.00.out	-458.717	-460.678	-460.657	1.0672		52_Benzene-AcOH_OH-pi.out	-230.795	-231.85	-231.841	52_Benzene-AcOH_OH-pi.out	-227.921	-228.828	-228.816	52_Benzene-AcOH_OH-pi_2.00.out	0.456778	0.593886	0.542067	-0.0518191
53_Benzene-AcNH2_NH-pi_0.90.out	-438.87	-440.808	-440.791	1.06505		53_Benzene-AcNH2_NH-pi.out	-230.795	-231.85	-231.841	53_Benzene-AcNH2_NH-pi.out	-208.077	-208.951	-208.945	53_Benzene-AcNH2_NH-pi_0.90.out	-1.24641	4.46047	2.98969	-1.47078
53_Benzene-AcNH2_NH-pi_0.95.out	-438.872	-440.808	-440.792	1.06511		53_Benzene-AcNH2_NH-pi.out	-230.795	-231.85	-231.841	53_Benzene-AcNH2_NH-pi.out	-208.077	-208.951	-208.945	53_Benzene-AcNH2_NH-pi_0.95.out	0.163592	4.79801	3.60831	-1.18971
53_Benzene-AcNH2_NH-pi_1.00.out	-438.874	-440.808	-440.792	1.06516		53_Benzene-AcNH2_NH-pi.out	-230.795	-231.85	-231.841	53_Benzene-AcNH2_NH-pi.out	-208.077	-208.951	-208.945	53_Benzene-AcNH2_NH-pi_1.00.out	1.00933	4.7856	3.81708	-0.968516
53_Benzene-AcNH2_NH-pi_1.05.out	-438.874	-440.808	-440.792	1.0652		53_Benzene-AcNH2_NH-pi.out	-230.795	-231.85	-231.841	53_Benzene-AcNH2_NH-pi.out	-208.077	-208.951	-208.945	53_Benzene-AcNH2_NH-pi_1.05.out	1.48472	4.57166	3.77839	-0.79327
53_Benzene-AcNH2_NH-pi_1.10.out	-438.875	-440.807	-440.792	1.06524		53_Benzene-AcNH2_NH-pi.out	-230.795	-231.85	-231.841	53_Benzene-AcNH2_NH-pi.out	-208.077	-208.951	-208.945	53_Benzene-AcNH2_NH-pi_1.10.out	1.71837	4.25166	3.59766	-0.653997
53_Benzene-AcNH2_NH-pi_1.25.out	-438.875	-440.806	-440.79	1.06531		53_Benzene-AcNH2_NH-pi.out	-230.795	-231.85	-231.841	53_Benzene-AcNH2_NH-pi.out	-208.077	-208.951	-208.945	53_Benzene-AcNH2_NH-pi_1.25.out	1.7108	3.14388	2.76373	-0.38015
53_Benzene-AcNH2_NH-pi_1.50.out	-438.874	-440.803	-440.788	1.06536		53_Benzene-AcNH2_NH-pi.out	-230.795	-231.85	-231.841	53_Benzene-AcNH2_NH-pi.out	-208.077	-208.951	-208.945	53_Benzene-AcNH2_NH-pi_1.50.out	1.13182	1.73185	1.55982	-0.172028
53_Benzene-AcNH2_NH-pi_2.00.out	-438.873	-440.801	-440.787	1.06541		53_Benzene-AcNH2_NH-pi.out	-230.795	-231.85	-231.841	53_Benzene-AcNH2_NH-pi.out	-208.077	-208.951	-208.945	53_Benzene-AcNH2_NH-pi_2.00.out	0.379595	0.512812	0.467554	-0.0452574
54_Benzene-Water_OH-pi_0.90.out	-306.859	-308.22	-308.206	1.06526		54_Benzene-Water_OH-pi.out	-230.795	-231.85	-231.841	54_Benzene-Water_OH-pi.out	-76.0658	-76.3654	-76.3619	54_Benzene-Water_OH-pi_0.90.out	-0.964393	3.35161	2.20979	-1.14182
54_Benzene-Water_OH-pi_0.95.out	-306.861	-308.221	-308.207	1.06534		54_Benzene-Water_OH-pi.out	-230.795	-231.85	-231.841	54_Benzene-Water_OH-pi.out	-76.0658	-76.3654	-76.3619	54_Benzene-Water_OH-pi_0.95.out	0.263644	3.64516	2.74604	-0.899118
54_Benzene-Water_OH-pi_1.00.out	-306.863	-308.221	-308.208	1.0654		54_Benzene-Water_OH-pi.out	-230.795	-231.85	-231.841	54_Benzene-Water_OH-pi.out	-76.0658	-76.3654	-76.3619	54_Benzene-Water_OH-pi_1.00.out	0.958622	3.61376	2.90225	-0.711514
54_Benzene-Water_OH-pi_1.05.out	-306.863	-308.221	-308.207	1.06546		54_Benzene-Water_OH-pi.out	-230.795	-231.85	-231.841	54_Benzene-Water_OH-pi.out	-76.0658	-76.3654	-76.3619	54_Benzene-Water_OH-pi_1.05.out	1.32322	3.4111	2.84568	-0.565414
54_Benzene-Water_OH-pi_1.10.out	-306.863	-308.22	-308.207	1.0655		54_Benzene-Water_OH-pi.out	-230.795	-231.85	-231.841	54_Benzene-Water_OH-pi.out	-76.0658	-76.3654	-76.3619	54_Benzene-Water_OH-pi_1.10.out	1.4845	3.12945	2.67815	-0.451298
54_Benzene-Water_OH-pi_1.25.out	-306.863	-308.219	-308.206	1.06558		54_Benzene-Water_OH-pi.out	-230.795	-231.85	-231.841	54_Benzene-Water_OH-pi.out	-76.0658	-76.3654	-76.3619	54_Benzene-Water_OH-pi_1.25.out	1.42279	2.23592	2.00057	-0.235353
54_Benzene-Water_OH-pi_1.50.out	-306.863	-308.217	-308.205	1.06565		54_Benzene-Water_OH-pi.out	-230.795	-231.85	-231.841	54_Benzene-Water_OH-pi.out	-76.0658	-76.3654	-76.3619	54_Benzene-Water_OH-pi_1.50.out	0.961348	1.22189	1.1341	-0.0877914
54_Benzene-Water_OH-pi_2.00.out	-306.862	-308.216	-308.204	1.0657		54_Benzene-Water_OH-pi.out	-230.795	-231.85	-231.841	54_Benzene-Water_OH-pi.out	-76.0658	-76.3654	-76.3619	54_Benzene-Water_OH-pi_2.00.out	0.413397	0.439548	0.422209	-0.0173394
55_Benzene-MeOH_OH-pi_0.90.out	-345.89	-347.44	-347.432	1.06467		55_Benzene-MeOH_OH-pi.out	-230.795	-231.85	-231.841	55_Benzene-MeOH_OH-pi.out	-115.1	-115.584	-115.587	55_Benzene-MeOH_OH-pi_0.90.out	-3.11187	4.45493	2.35825	-2.09668
55_Benzene-MeOH_OH-pi_0.95.out	-345.893	-347.441	-347.433	1.06478		55_Benzene-MeOH_OH-pi.out	-230.795	-231.85	-231.841	55_Benzene-MeOH_OH-pi.out	-115.1	-115.584	-115.587	55_Benzene-MeOH_OH-pi_0.95.out	-1.22491	4.84394	3.16181	-1.68214
55_Benzene-MeOH_OH-pi_1.00.out	-345.895	-347.441	-347.434	1.06487		55_Benzene-MeOH_OH-pi.out	-230.795	-231.85	-231.841	55_Benzene-MeOH_OH-pi.out	-115.1	-115.584	-115.587	55_Benzene-MeOH_OH-pi_1.00.out	-0.0519804	4.827	3.47159	-1.35541
55_Benzene-MeOH_OH-pi_1.05.out	-345.896	-347.441	-347.434	1.06495		55_Benzene-MeOH_OH-pi.out	-230.795	-231.85	-231.841	55_Benzene-MeOH_OH-pi.out	-115.1	-115.584	-115.587	55_Benzene-MeOH_OH-pi_1.05.out	0.653901	4.58436	3.4878	-1.09657
55_Benzene-MeOH_OH-pi_1.10.out	-345.897	-347.44	-347.434	1.06501		55_Benzene-MeOH_OH-pi.out	-230.795	-231.85	-231.841	55_Benzene-MeOH_OH-pi.out	-115.1	-115.584	-115.587	55_Benzene-MeOH_OH-pi_1.10.out	1.05453	4.22956	3.33832	-0.891247
55_Benzene-MeOH_OH-pi_1.25.out	-345.897	-347.438	-347.432	1.06514		55_Benzene-MeOH_OH-pi.out	-230.795	-231.85	-231.841	55_Benzene-MeOH_OH-pi.out	-115.1	-115.584	-115.587	55_Benzene-MeOH_OH-pi_1.25.out	1.347	3.0493	2.55765	-0.491645
55_Benzene-MeOH_OH-pi_1.50.out	-345.897	-347.436	-347.431	1.06525		55_Benzene-MeOH_OH-pi.out	-230.795	-231.85	-231.841	55_Benzene-MeOH_OH-pi.out	-115.1	-115.584	-115.587	55_Benzene-MeOH_OH-pi_1.50.out	1.00472	1.64647	1.44628	-0.200189
55_Benzene-MeOH_OH-pi_2.00.out	-345.896	-347.434	-347.429	1.06533		55_Benzene-MeOH_OH-pi.out	-230.795	-231.85	-231.841	55_Benzene-MeOH_OH-pi.out	-115.1	-115.584	-115.587	55_Benzene-MeOH_OH-pi_2.00.out	0.43705	0.557181	0.510345	-0.0468363
56_Benzene-MeNH2_NH-pi_0.90.out	-326.05	-327.568	-327.566	1.0622		56_Benzene-MeNH2_NH-pi.out	-230.795	-231.85	-231.841	56_Benzene-MeNH2_NH-pi.out	-95.2616	-95.7131	-95.723	56_Benzene-MeNH2_NH-pi_0.90.out	-4.12004	3.56882	1.41799	-2.15083
56_Benzene-MeNH2_NH-pi_0.95.out	-326.053	-327.569	-327.568	1.06231		56_Benzene-MeNH2_NH-pi.out	-230.795	-231.85	-231.841	56_Benzene-MeNH2_NH-pi.out	-95.2616	-95.7131	-95.723	56_Benzene-MeNH2_NH-pi_0.95.out	-2.226	3.92591	2.20348	-1.72243
56_Benzene-MeNH2_NH-pi_1.00.out	-326.055	-327.569	-327.568	1.06241		56_Benzene-MeNH2_NH-pi.out	-230.795	-231.85	-231.841	56_Benzene-MeNH2_NH-pi.out	-95.2616	-95.7131	-95.723	56_Benzene-MeNH2_NH-pi_1.00.out	-1.03347	3.90339	2.51778	-1.38561
56_Benzene-MeNH2_NH-pi_1.05.out	-326.056	-327.569	-327.568	1.06249		56_Benzene-MeNH2_NH-pi.out	-230.795	-231.85	-231.841	56_Benzene-MeNH2_NH-pi.out	-95.2616	-95.7131	-95.723	56_Benzene-MeNH2_NH-pi_1.05.out	-0.254594	3.655	2.55306	-1.10194
56_Benzene-MeNH2_NH-pi_1.10.out	-326.057	-327.568	-327.568	1.06255		56_Benzene-MeNH2_NH-pi.out	-230.795	-231.85	-231.841	56_Benzene-MeNH2_NH-pi.out	-95.2616	-95.7131	-95.723	56_Benzene-MeNH2_NH-pi_1.10.out	0.200933	3.29313	2.41644	-0.876691
56_Benzene-MeNH2_NH-pi_1.25.out	-326.058	-327.566	-327.567	1.06268		56_Benzene-MeNH2_NH-pi.out	-230.795	-231.85	-231.841	56_Benzene-MeNH2_NH-pi.out	-95.2616	-95.7131	-95.723	56_Benzene-MeNH2_NH-pi_1.25.out	0.603432	2.18935	1.72814	-0.461212
56_Benzene-MeNH2_NH-pi_1.50.out	-326.058	-327.564	-327.565	1.06279		56_Benzene-MeNH2_NH-pi.out	-230.795	-231.85	-231.841	56_Benzene-MeNH2_NH-pi.out	-95.2616	-95.7131	-95.723	56_Benzene-MeNH2_NH-pi_1.50.out	0.467989	1.04579	0.867343	-0.178445
56_Benzene-MeNH2_NH-pi_2.00.out	-326.057	-327.563	-327.564	1.06286		56_Benzene-MeNH2_NH-pi.out	-230.795	-231.85	-231.841	56_Benzene-MeNH2_NH-pi.out	-95.2616	-95.7131	-95.723	56_Benzene-MeNH2_NH-pi_2.00.out	0.18394	0.292174	0.254003	-0.0381708
57_Benzene-Peptide_NH-pi_0.90.out	-477.905	-480.044	-480.028	1.06431		57_Benzene-Peptide_NH-pi.out	-230.795	-231.85	-231.841	57_Benzene-Peptide_NH-pi.out	-247.119	-248.185	-248.184	57_Benzene-Peptide_NH-pi_0.90.out	-5.83012	5.44005	2.17391	-3.26615
57_Benzene-Peptide_NH-pi_0.95.out	-477.91	-480.045	-480.031	1.06445		57_Benzene-Peptide_NH-pi.out	-230.795	-231.85	-231.841	57_Benzene-Peptide_NH-pi.out	-247.119	-248.185	-248.184	57_Benzene-Peptide_NH-pi_0.95.out	-2.53667	6.26881	3.7071	-2.5617
57_Benzene-Peptide_NH-pi_1.00.out	-477.913	-480.045	-480.032	1.06455		57_Benzene-Peptide_NH-pi.out	-230.795	-231.85	-231.841	57_Benzene-Peptide_NH-pi.out	-247.119	-248.185	-248.184	57_Benzene-Peptide_NH-pi_1.00.out	-0.613932	6.31533	4.28824	-2.02709
57_Benzene-Peptide_NH-pi_1.05.out	-477.915	-480.045	-480.032	1.06464		57_Benzene-Peptide_NH-pi.out	-230.795	-231.85	-231.841	57_Benzene-Peptide_NH-pi.out	-247.119	-248.185	-248.184	57_Benzene-Peptide_NH-pi_1.05.out	0.483987	5.97019	4.35373	-1.61646
57_Benzene-Peptide_NH-pi_1.10.out	-477.916	-480.044	-480.031	1.0647		57_Benzene-Peptide_NH-pi.out	-230.795	-231.85	-231.841	57_Benzene-Peptide_NH-pi.out	-247.119	-248.185	-248.184	57_Benzene-Peptide_NH-pi_1.10.out	1.08157	5.45196	4.1531	-1.29886
57_Benzene-Peptide_NH-pi_1.25.out	-477.917	-480.041	-480.03	1.06483		57_Benzene-Peptide_NH-pi.out	-230.795	-231.85	-231.841	57_Benzene-Peptide_NH-pi.out	-247.119	-248.185	-248.184	57_Benzene-Peptide_NH-pi_1.25.out	1.51273	3.79565	3.09391	-0.701738
57_Benzene-Peptide_NH-pi_1.50.out	-477.916	-480.038	-480.027	1.06495		57_Benzene-Peptide_NH-pi.out	-230.795	-231.85	-231.841	57_Benzene-Peptide_NH-pi.out	-247.119	-248.185	-248.184	57_Benzene-Peptide_NH-pi_1.50.out	1.12243	1.97889	1.69559	-0.283302
57_Benzene-Peptide_NH-pi_2.00.out	-477.915	-480.036	-480.026	1.06502		57_Benzene-Peptide_NH-pi.out	-230.795	-231.85	-231.841	57_Benzene-Peptide_NH-pi.out	-247.119	-248.185	-248.184	57_Benzene-Peptide_NH-pi_2.00.out	0.505339	0.674031	0.607624	-0.0664077
58_Pyridine-Pyridine_CH-N_0.90.out	-493.584	-495.782	-495.748	1.06209		58_Pyridine-Pyridine_CH-N.out	-246.793	-247.888	-247.872	58_Pyridine-Pyridine_CH-N.out	-246.793	-247.888	-247.872	58_Pyridine-Pyridine_CH-N_0.90.out	-2.1417	3.33207	2.04597	-1.2861
58_Pyridine-Pyridine_CH-N_0.95.out	-493.587	-495.784	-495.75	1.06213		58_Pyridine-Pyridine_CH-N.out	-246.793	-247.888	-247.872	58_Pyridine-Pyridine_CH-N.out	-246.793	-247.888	-247.872	58_Pyridine-Pyridine_CH-N_0.95.out	-0.169046	4.19503	3.18746	-1.00757
58_Pyridine-Pyridine_CH-N_1.00.out	-493.589	-495.784	-495.75	1.06218		58_Pyridine-Pyridine_CH-N.out	-246.793	-247.888	-247.872	58_Pyridine-Pyridine_CH-N.out	-246.793	-247.888	-247.872	58_Pyridine-Pyridine_CH-N_1.00.out	1.18693	4.38329	3.65728	-0.72601
58_Pyridine-Pyridine_CH-N_1.05.out	-493.59	-495.783	-495.75	1.06221		58_Pyridine-Pyridine_CH-N.out	-246.793	-247.888	-247.872	58_Pyridine-Pyridine_CH-N.out	-246.793	-247.888	-247.872	58_Pyridine-Pyridine_CH-N_1.05.out	1.63444	4.046	3.50116	-0.544844
58_Pyridine-Pyridine_CH-N_1.10.out	-493.59	-495.783	-495.75	1.06223		58_Pyridine-Pyridine_CH-N.out	-246.793	-247.888	-247.872	58_Pyridine-Pyridine_CH-N.out	-246.793	-247.888	-247.872	58_Pyridine-Pyridine_CH-N_1.10.out	1.70122	3.56213	3.14009	-0.422038
58_Pyridine-Pyridine_CH-N_1.25.out	-493.589	-495.78	-495.748	1.06228		58_Pyridine-Pyridine_CH-N.out	-246.793	-247.888	-247.872	58_Pyridine-Pyridine_CH-N.out	-246.793	-247.888	-247.872	58_Pyridine-Pyridine_CH-N_1.25.out	1.3016	2.24282	2.01899	-0.223823
58_Pyridine-Pyridine_CH-N_1.50.out	-493.588	-495.779	-495.746	1.06232		58_Pyridine-Pyridine_CH-N.out	-246.793	-247.888	-247.872	58_Pyridine-Pyridine_CH-N.out	-246.793	-247.888	-247.872	58_Pyridine-Pyridine_CH-N_1.50.out	0.673176	1.04703	0.947499	-0.0995288
58_Pyridine-Pyridine_CH-N_2.00.out	-493.587	-495.777	-495.745	1.06234		58_Pyridine-Pyridine_CH-N.out	-246.793	-247.888	-247.872	58_Pyridine-Pyridine_CH-N.out	-246.793	-247.888	-247.872	58_Pyridine-Pyridine_CH-N_2.00.out	0.196783	0.289976	0.261283	-0.0286934
59_Ethyne-Water_CH-O_0.90.out	-152.922	-153.568	-153.565	1.0702		59_Ethyne-Water_CH-O.out	-76.8536	-77.1988	-77.1991	59_Ethyne-Water_CH-O.out	-76.0661	-76.3655	-76.362	59_Ethyne-Water_CH-O_0.90.out	1.53123	2.60473	2.40076	-0.203976
59_Ethyne-Water_CH-O_0.95.out	-152.923	-153.569	-153.565	1.07024		59_Ethyne-Water_CH-O.out	-76.8536	-77.1988	-77.1991	59_Ethyne-Water_CH-O.out	-76.0661	-76.3655	-76.362	59_Ethyne-Water_CH-O_0.95.out	2.03226	2.85884	2.70787	-0.150971
59_Ethyne-Water_CH-O_1.00.out	-152.923	-153.569	-153.565	1.07028		59_Ethyne-Water_CH-O.out	-76.8536	-77.1988	-77.1991	59_Ethyne-Water_CH-O.out	-76.0661	-76.3655	-76.362	59_Ethyne-Water_CH-O_1.00.out	2.257	2.8906	2.77835	-0.112249
59_Ethyne-Water_CH-O_1.05.out	-152.923	-153.569	-153.565	1.07031		59_Ethyne-Water_CH-O.out	-76.8536	-77.1988	-77.1991	59_Ethyne-Water_CH-O.out	-76.0661	-76.3655	-76.362	59_Ethyne-Water_CH-O_1.05.out	2.3093	2.792	2.70808	-0.0839217
59_Ethyne-Water_CH-O_1.10.out	-152.923	-153.568	-153.565	1.07034		59_Ethyne-Water_CH-O.out	-76.8536	-77.1988	-77.1991	59_Ethyne-Water_CH-O.out	-76.0661	-76.3655	-76.362	59_Ethyne-Water_CH-O_1.10.out	2.25775	2.62292	2.55973	-0.0631976
59_Ethyne-Water_CH-O_1.25.out	-152.923	-153.567	-153.564	1.07037		59_Ethyne-Water_CH-O.out	-76.8536	-77.1988	-77.1991	59_Ethyne-Water_CH-O.out	-76.0661	-76.3655	-76.362	59_Ethyne-Water_CH-O_1.25.out	1.85641	2.00312	1.97494	-0.0281791
59_Ethyne-Water_CH-O_1.50.out	-152.922	-153.566	-153.563	1.07039		59_Ethyne-Water_CH-O.out	-76.8536	-77.1988	-77.1991	59_Ethyne-Water_CH-O.out	-76.0661	-76.3655	-76.362	59_Ethyne-Water_CH-O_1.50.out	1.18053	1.18987	1.18152	-0.00834668
59_Ethyne-Water_CH-O_2.00.out	-152.92	-153.565	-153.562	1.0704		59_Ethyne-Water_CH-O.out	-76.8536	-77.1988	-77.1991	59_Ethyne-Water_CH-O.out	-76.0661	-76.3655	-76.362	59_Ethyne-Water_CH-O_2.00.out	0.501084	0.471513	0.471628	0.000114493
60_Ethyne-AcOH_OH-pi_0.90.out	-304.776	-306.034	-306.021	1.07019		60_Ethyne-AcOH_OH-pi.out	-76.8535	-77.1988	-77.199	60_Ethyne-AcOH_OH-pi.out	-227.921	-228.828	-228.816	60_Ethyne-AcOH_OH-pi_0.90.out	0.976132	4.72303	3.78766	-0.93537
60_Ethyne-AcOH_OH-pi_0.95.out	-304.778	-306.035	-306.022	1.07026		60_Ethyne-AcOH_OH-pi.out	-76.8535	-77.1988	-77.199	60_Ethyne-AcOH_OH-pi.out	-227.921	-228.828	-228.816	60_Ethyne-AcOH_OH-pi_0.95.out	2.13425	5.11208	4.3735	-0.738577
60_Ethyne-AcOH_OH-pi_1.00.out	-304.779	-306.035	-306.022	1.07032		60_Ethyne-AcOH_OH-pi.out	-76.8535	-77.1988	-77.199	60_Ethyne-AcOH_OH-pi.out	-227.921	-228.828	-228.816	60_Ethyne-AcOH_OH-pi_1.00.out	2.74164	5.11144	4.5257	-0.585737
60_Ethyne-AcOH_OH-pi_1.05.out	-304.779	-306.034	-306.022	1.07036		60_Ethyne-AcOH_OH-pi.out	-76.8535	-77.1988	-77.199	60_Ethyne-AcOH_OH-pi.out	-227.921	-228.828	-228.816	60_Ethyne-AcOH_OH-pi_1.05.out	2.99724	4.88461	4.41819	-0.466418
60_Ethyne-AcOH_OH-pi_1.10.out	-304.779	-306.034	-306.021	1.07039		60_Ethyne-AcOH_OH-pi.out	-76.8535	-77.1988	-77.199	60_Ethyne-AcOH_OH-pi.out	-227.921	-228.828	-228.816	60_Ethyne-AcOH_OH-pi_1.10.out	3.0327	4.53785	4.16465	-0.3732
60_Ethyne-AcOH_OH-pi_1.25.out	-304.778	-306.032	-306.02	1.07044		60_Ethyne-AcOH_OH-pi.out	-76.8535	-77.1988	-77.199	60_Ethyne-AcOH_OH-pi.out	-227.921	-228.828	-228.816	60_Ethyne-AcOH_OH-pi_1.25.out	2.56033	3.32866	3.13186	-0.196801
60_Ethyne-AcOH_OH-pi_1.50.out	-304.777	-306.029	-306.017	1.07047		60_Ethyne-AcOH_OH-pi.out	-76.8535	-77.1988	-77.199	60_Ethyne-AcOH_OH-pi.out	-227.921	-228.828	-228.816	60_Ethyne-AcOH_OH-pi_1.50.out	1.54786	1.79986	1.72593	-0.0739259
60_Ethyne-AcOH_OH-pi_2.00.out	-304.775	-306.027	-306.015	1.07049		60_Ethyne-AcOH_OH-pi.out	-76.8535	-77.1988	-77.199	60_Ethyne-AcOH_OH-pi.out	-227.921	-228.828	-228.816	60_Ethyne-AcOH_OH-pi_2.00.out	0.542109	0.564135	0.551112	-0.0130223
61_Pentane-AcOH_0.90.out	-424.332	-426.237	-426.253	1.06723		61_Pentane-AcOH.out	-196.417	-197.404	-197.434	61_Pentane-AcOH.out	-227.921	-228.828	-228.816	61_Pentane-AcOH_0.90.out	-3.60574	2.93536	1.69387	-1.24149
61_Pentane-AcOH_0.95.out	-424.334	-426.237	-426.253	1.0673		61_Pentane-AcOH.out	-196.417	-197.404	-197.434	61_Pentane-AcOH.out	-227.921	-228.828	-228.816	61_Pentane-AcOH_0.95.out	-2.38959	3.07987	2.0474	-1.03247
61_Pentane-AcOH_1.00.out	-424.335	-426.237	-426.254	1.06737		61_Pentane-AcOH.out	-196.417	-197.404	-197.434	61_Pentane-AcOH.out	-227.921	-228.828	-228.816	61_Pentane-AcOH_1.00.out	-1.5649	3.01852	2.15592	-0.862597
61_Pentane-AcOH_1.05.out	-424.336	-426.236	-426.253	1.06743		61_Pentane-AcOH.out	-196.417	-197.404	-197.434	61_Pentane-AcOH.out	-227.921	-228.828	-228.816	61_Pentane-AcOH_1.05.out	-1.0075	2.8407	2.11703	-0.72367
61_Pentane-AcOH_1.10.out	-424.337	-426.236	-426.253	1.06747		61_Pentane-AcOH.out	-196.417	-197.404	-197.434	61_Pentane-AcOH.out	-227.921	-228.828	-228.816	61_Pentane-AcOH_1.10.out	-0.634366	2.60455	1.99467	-0.609881
61_Pentane-AcOH_1.25.out	-424.338	-426.235	-426.252	1.06759		61_Pentane-AcOH.out	-196.417	-197.404	-197.434	61_Pentane-AcOH.out	-227.921	-228.828	-228.816	61_Pentane-AcOH_1.25.out	-0.118327	1.84277	1.46836	-0.374407
61_Pentane-AcOH_1.50.out	-424.338	-426.233	-426.251	1.06771		61_Pentane-AcOH.out	-196.417	-197.404	-197.434	61_Pentane-AcOH.out	-227.921	-228.828	-228.816	61_Pentane-AcOH_1.50.out	0.0352267	0.813458	0.65737	-0.156087
61_Pentane-AcOH_2.00.out	-424.338	-426.232	-426.25	1.06778		61_Pentane-AcOH.out	-196.417	-197.404	-197.434	61_Pentane-AcOH.out	-227.921	-228.828	-228.816	61_Pentane-AcOH_2.00.out	0.00589109	0.181128	0.143185	-0.0379434
62_Pentane-AcNH2_0.90.out	-404.487	-406.361	-406.382	1.06531		62_Pentane-AcNH2.out	-196.417	-197.404	-197.434	62_Pentane-AcNH2.out	-208.077	-208.951	-208.945	62_Pentane-AcNH2_0.90.out	-4.43034	3.45976	1.93339	-1.52637
62_Pentane-AcNH2_0.95.out	-404.489	-406.361	-406.383	1.06541		62_Pentane-AcNH2.out	-196.417	-197.404	-197.434	62_Pentane-AcNH2.out	-208.077	-208.951	-208.945	62_Pentane-AcNH2_0.95.out	-2.72651	3.72139	2.48633	-1.23506
62_Pentane-AcNH2_1.00.out	-404.491	-406.361	-406.384	1.06549		62_Pentane-AcNH2.out	-196.417	-197.404	-197.434	62_Pentane-AcNH2.out	-208.077	-208.951	-208.945	62_Pentane-AcNH2_1.00.out	-1.62334	3.66749	2.66081	-1.00667
62_Pentane-AcNH2_1.05.out	-404.492	-406.361	-406.384	1.06556		62_Pentane-AcNH2.out	-196.417	-197.404	-197.434	62_Pentane-AcNH2.out	-208.077	-208.951	-208.945	62_Pentane-AcNH2_1.05.out	-0.91412	3.44323	2.6171	-0.826133
62_Pentane-AcNH2_1.10.out	-404.493	-406.36	-406.383	1.06562		62_Pentane-AcNH2.out	-196.417	-197.404	-197.434	62_Pentane-AcNH2.out	-208.077	-208.951	-208.945	62_Pentane-AcNH2_1.10.out	-0.465085	3.1385	2.45562	-0.68288
62_Pentane-AcNH2_1.25.out	-404.494	-406.359	-406.382	1.06575		62_Pentane-AcNH2.out	-196.417	-197.404	-197.434	62_Pentane-AcNH2.out	-208.077	-208.951	-208.945	62_Pentane-AcNH2_1.25.out	0.0826576	2.17123	1.77002	-0.401211
62_Pentane-AcNH2_1.50.out	-404.494	-406.357	-406.381	1.06587		62_Pentane-AcNH2.out	-196.417	-197.404	-197.434	62_Pentane-AcNH2.out	-208.077	-208.951	-208.945	62_Pentane-AcNH2_1.50.out	0.161815	1.07585	0.891124	-0.184723
62_Pentane-AcNH2_2.00.out	-404.494	-406.356	-406.38	1.06595		62_Pentane-AcNH2.out	-196.417	-197.404	-197.434	62_Pentane-AcNH2.out	-208.077	-208.951	-208.945	62_Pentane-AcNH2_2.00.out	0.0646017	0.290017	0.239404	-0.0506135
63_Benzene-AcOH_0.90.out	-458.707	-460.684	-460.659	1.06663		63_Benzene-AcOH.out	-230.795	-231.85	-231.841	63_Benzene-AcOH.out	-227.921	-228.828	-228.816	63_Benzene-AcOH_0.90.out	-5.34835	4.10104	1.3798	-2.72124
63_Benzene-AcOH_0.95.out	-458.712	-460.685	-460.661	1.06674		63_Benzene-AcOH.out	-230.795	-231.85	-231.841	63_Benzene-AcOH.out	-227.921	-228.828	-228.816	63_Benzene-AcOH_0.95.out	-2.73198	4.65775	2.52446	-2.13329
63_Benzene-AcOH_1.00.out	-458.714	-460.685	-460.661	1.06682		63_Benzene-AcOH.out	-230.795	-231.85	-231.841	63_Benzene-AcOH.out	-227.921	-228.828	-228.816	63_Benzene-AcOH_1.00.out	-1.17617	4.62774	2.94556	-1.68218
63_Benzene-AcOH_1.05.out	-458.715	-460.684	-460.661	1.06689		63_Benzene-AcOH.out	-230.795	-231.85	-231.841	63_Benzene-AcOH.out	-227.921	-228.828	-228.816	63_Benzene-AcOH_1.05.out	-0.270167	4.30622	2.97267	-1.33356
63_Benzene-AcOH_1.10.out	-458.716	-460.684	-460.661	1.06694		63_Benzene-AcOH.out	-230.795	-231.85	-231.841	63_Benzene-AcOH.out	-227.921	-228.828	-228.816	63_Benzene-AcOH_1.10.out	0.237558	3.86223	2.79899	-1.06324
63_Benzene-AcOH_1.25.out	-458.717	-460.681	-460.66	1.06704		63_Benzene-AcOH.out	-230.795	-231.85	-231.841	63_Benzene-AcOH.out	-227.921	-228.828	-228.816	63_Benzene-AcOH_1.25.out	0.671156	2.52194	1.96519	-0.55675
63_Benzene-AcOH_1.50.out	-458.717	-460.679	-460.658	1.06714		63_Benzene-AcOH.out	-230.795	-231.85	-231.841	63_Benzene-AcOH.out	-227.921	-228.828	-228.816	63_Benzene-AcOH_1.50.out	0.489941	1.13982	0.933715	-0.206104
63_Benzene-AcOH_2.00.out	-458.716	-460.678	-460.657	1.06721		63_Benzene-AcOH.out	-230.795	-231.85	-231.841	63_Benzene-AcOH.out	-227.921	-228.828	-228.816	63_Benzene-AcOH_2.00.out	0.178481	0.294422	0.253739	-0.040683
64_Peptide-Ethene_0.90.out	-325.185	-326.632	-326.64	1.06651		64_Peptide-Ethene.out	-247.119	-248.185	-248.184	64_Peptide-Ethene.out	-78.0696	-78.4415	-78.4536	64_Peptide-Ethene_0.90.out	-2.32528	2.93208	1.79264	-1.13944
64_Peptide-Ethene_0.95.out	-325.187	-326.632	-326.641	1.06658		64_Peptide-Ethene.out	-247.119	-248.185	-248.184	64_Peptide-Ethene.out	-78.0696	-78.4415	-78.4536	64_Peptide-Ethene_0.95.out	-1.07572	3.20232	2.28025	-0.922068
64_Peptide-Ethene_1.00.out	-325.188	-326.632	-326.641	1.06663		64_Peptide-Ethene.out	-247.119	-248.185	-248.184	64_Peptide-Ethene.out	-78.0696	-78.4415	-78.4536	64_Peptide-Ethene_1.00.out	-0.304124	3.18507	2.43518	-0.749889
64_Peptide-Ethene_1.05.out	-325.189	-326.632	-326.641	1.06668		64_Peptide-Ethene.out	-247.119	-248.185	-248.184	64_Peptide-Ethene.out	-78.0696	-78.4415	-78.4536	64_Peptide-Ethene_1.05.out	0.158035	3.00966	2.39702	-0.61264
64_Peptide-Ethene_1.10.out	-325.189	-326.631	-326.641	1.06671		64_Peptide-Ethene.out	-247.119	-248.185	-248.184	64_Peptide-Ethene.out	-78.0696	-78.4415	-78.4536	64_Peptide-Ethene_1.10.out	0.420178	2.7571	2.25405	-0.503042
64_Peptide-Ethene_1.25.out	-325.19	-326.63	-326.64	1.0668		64_Peptide-Ethene.out	-247.119	-248.185	-248.184	64_Peptide-Ethene.out	-78.0696	-78.4415	-78.4536	64_Peptide-Ethene_1.25.out	0.621401	1.92969	1.64319	-0.286507
64_Peptide-Ethene_1.50.out	-325.189	-326.628	-326.639	1.06688		64_Peptide-Ethene.out	-247.119	-248.185	-248.184	64_Peptide-Ethene.out	-78.0696	-78.4415	-78.4536	64_Peptide-Ethene_1.50.out	0.421811	0.911211	0.798074	-0.113137
64_Peptide-Ethene_2.00.out	-325.189	-326.627	-326.638	1.06694		64_Peptide-Ethene.out	-247.119	-248.185	-248.184	64_Peptide-Ethene.out	-78.0696	-78.4415	-78.4536	64_Peptide-Ethene_2.00.out	0.124855	0.199669	0.180259	-0.0194105
65_Pyridine-Ethyne_0.90.out	-323.649	-325.093	-325.076	1.06178		65_Pyridine-Ethyne.out	-246.794	-247.888	-247.872	65_Pyridine-Ethyne.out	-76.8534	-77.1988	-77.199	65_Pyridine-Ethyne_0.90.out	1.48132	3.88406	3.21274	-0.671324
65_Pyridine-Ethyne_0.95.out	-323.651	-325.094	-325.077	1.0618		65_Pyridine-Ethyne.out	-246.794	-247.888	-247.872	65_Pyridine-Ethyne.out	-76.8534	-77.1988	-77.199	65_Pyridine-Ethyne_0.95.out	2.20822	4.18064	3.63414	-0.546508
65_Pyridine-Ethyne_1.00.out	-323.651	-325.094	-325.077	1.06182		65_Pyridine-Ethyne.out	-246.794	-247.888	-247.872	65_Pyridine-Ethyne.out	-76.8534	-77.1988	-77.199	65_Pyridine-Ethyne_1.00.out	2.5778	4.20197	3.75387	-0.448095
65_Pyridine-Ethyne_1.05.out	-323.651	-325.094	-325.077	1.06183		65_Pyridine-Ethyne.out	-246.794	-247.888	-247.872	65_Pyridine-Ethyne.out	-76.8534	-77.1988	-77.199	65_Pyridine-Ethyne_1.05.out	2.7146	4.05597	3.68567	-0.370295
65_Pyridine-Ethyne_1.10.out	-323.651	-325.093	-325.077	1.06185		65_Pyridine-Ethyne.out	-246.794	-247.888	-247.872	65_Pyridine-Ethyne.out	-76.8534	-77.1988	-77.199	65_Pyridine-Ethyne_1.10.out	2.70364	3.81564	3.50682	-0.308819
65_Pyridine-Ethyne_1.25.out	-323.651	-325.092	-325.076	1.06188		65_Pyridine-Ethyne.out	-246.794	-247.888	-247.872	65_Pyridine-Ethyne.out	-76.8534	-77.1988	-77.199	65_Pyridine-Ethyne_1.25.out	2.27928	2.92651	2.73711	-0.189401
65_Pyridine-Ethyne_1.50.out	-323.649	-325.09	-325.074	1.06191		65_Pyridine-Ethyne.out	-246.794	-247.888	-247.872	65_Pyridine-Ethyne.out	-76.8534	-77.1988	-77.199	65_Pyridine-Ethyne_1.50.out	1.44154	1.72112	1.62379	-0.0973306
65_Pyridine-Ethyne_2.00.out	-323.648	-325.088	-325.072	1.06193		65_Pyridine-Ethyne.out	-246.794	-247.888	-247.872	65_Pyridine-Ethyne.out	-76.8534	-77.1988	-77.199	65_Pyridine-Ethyne_2.00.out	0.578473	0.641856	0.608394	-0.0334621
66_MeNH2-Pyridine_0.90.out	-342.051	-343.609	-343.599	1.06312		66_MeNH2-Pyridine.out	-95.2616	-95.7131	-95.723	66_MeNH2-Pyridine.out	-246.794	-247.888	-247.872	66_MeNH2-Pyridine_0.90.out	-2.76176	4.38153	2.42059	-1.96094
66_MeNH2-Pyridine_0.95.out	-342.053	-343.609	-343.6	1.0632		66_MeNH2-Pyridine.out	-95.2616	-95.7131	-95.723	66_MeNH2-Pyridine.out	-246.794	-247.888	-247.872	66_MeNH2-Pyridine_0.95.out	-1.2856	4.63004	3.01512	-1.61492
66_MeNH2-Pyridine_1.00.out	-342.055	-343.609	-343.6	1.06326		66_MeNH2-Pyridine.out	-95.2616	-95.7131	-95.723	66_MeNH2-Pyridine.out	-246.794	-247.888	-247.872	66_MeNH2-Pyridine_1.00.out	-0.332553	4.57859	3.24275	-1.33584
66_MeNH2-Pyridine_1.05.out	-342.056	-343.608	-343.6	1.06332		66_MeNH2-Pyridine.out	-95.2616	-95.7131	-95.723	66_MeNH2-Pyridine.out	-246.794	-247.888	-247.872	66_MeNH2-Pyridine_1.05.out	0.266333	4.35221	3.24279	-1.10942
66_MeNH2-Pyridine_1.10.out	-342.056	-343.608	-343.6	1.06337		66_MeNH2-Pyridine.out	-95.2616	-95.7131	-95.723	66_MeNH2-Pyridine.out	-246.794	-247.888	-247.872	66_MeNH2-Pyridine_1.10.out	0.625425	4.03389	3.10836	-0.925525
66_MeNH2-Pyridine_1.25.out	-342.057	-343.606	-343.599	1.06346		66_MeNH2-Pyridine.out	-95.2616	-95.7131	-95.723	66_MeNH2-Pyridine.out	-246.794	-247.888	-247.872	66_MeNH2-Pyridine_1.25.out	0.95221	2.96313	2.41174	-0.551387
66_MeNH2-Pyridine_1.50.out	-342.056	-343.604	-343.598	1.06355		66_MeNH2-Pyridine.out	-95.2616	-95.7131	-95.723	66_MeNH2-Pyridine.out	-246.794	-247.888	-247.872	66_MeNH2-Pyridine_1.50.out	0.742887	1.62921	1.37611	-0.2531
66_MeNH2-Pyridine_2.00.out	-342.056	-343.602	-343.596	1.06363		66_MeNH2-Pyridine.out	-95.2616	-95.7131	-95.723	66_MeNH2-Pyridine.out	-246.794	-247.888	-247.872	66_MeNH2-Pyridine_2.00.out	0.323377	0.537343	0.469052	-0.0682909

## Sheet: sterling (T) in progress
0.0831017	0.0430145	0.0306905	REF	0.012161	0.0437514	0.123596	H-bonds		complete
0.0836064	0.114273	0.0319319	REF	0.0369612	0.0999445	0.250912	pi stacks		complete
0.0522346	0.0739785	0.0184255	REF	0.0129068	0.0668868	0.199832	dispersion		partial
0.0529618	0.0555023	0.0153711	REF	0.00998257	0.0470982	0.137391	mixed influence		complete
0.0696642	0.0680792	0.0249239	REF	0.0179315	0.061106	0.168665	whole set RMSD
0.0557967	0.0829238	0.0295308	0.0179315	REF	0.0455209	0.153633
0.0288781	0.125841	0.0649017	0.061106	0.0455209	REF	0.108112
(Tc_sc)/VDZ-F12			conventional CCSD(T)
CP	raw	half	scaled T	{D,T}	sano-aVTZ	sano-aVDZ
			1.0918	<- obtained from fitting against half-CP (T)/haV{D,T}Z for S66 with Opus279 data
										x					filename	SCF	MP2	CCSD	CCSD(T)
0.248034	0.339413	0.293723	0.322724	0.323312	0.295589	0.229747	3.0152	4.8254	4.40942	4.705	3.13383	4.58607	4.14681	4.37656	01_Water-Water_0.90.out	-152.137	-152.681	-152.691	-152.708	01_Water-Water.out	-76.0659	-76.3368	-76.3419	-76.3505	01_Water-Water.out	-76.0661	-76.3368	-76.3419	-76.3505	01_Water-Water_0.90.out	-152.128	-152.595	-152.607	-152.619	01_Water-Water.out	-76.0616	-76.294	-76.3	-76.3059	01_Water-Water.out	-76.0618	-76.294	-76.3	-76.3059
0.208674	0.288656	0.248665	0.267663	0.269683	0.245158	0.186911	3.61928	5.08238	4.74837	4.99353	3.75398	4.92934	4.56915	4.75606	01_Water-Water_0.95.out	-152.138	-152.682	-152.691	-152.709	01_Water-Water.out	-76.0659	-76.3368	-76.3419	-76.3505	01_Water-Water.out	-76.0661	-76.3368	-76.3419	-76.3505	01_Water-Water_0.95.out	-152.129	-152.596	-152.607	-152.619	01_Water-Water.out	-76.0616	-76.294	-76.3	-76.3059	01_Water-Water.out	-76.0618	-76.294	-76.3	-76.3059
0.173728	0.243267	0.208497	0.219739	0.222484	0.201263	0.150862	3.87584	5.05367	4.78436	4.98563	4.01906	4.97188	4.67562	4.82649	01_Water-Water_1.00.out	-152.138	-152.682	-152.691	-152.709	01_Water-Water.out	-76.0659	-76.3368	-76.3419	-76.3505	01_Water-Water.out	-76.0661	-76.3368	-76.3419	-76.3505	01_Water-Water_1.00.out	-152.13	-152.596	-152.607	-152.619	01_Water-Water.out	-76.0616	-76.294	-76.3	-76.3059	01_Water-Water.out	-76.0618	-76.294	-76.3	-76.3059
0.143091	0.203113	0.173102	0.17867	0.18164	0.163647	0.120913	3.91135	4.85602	4.63769	4.80134	4.05684	4.8313	4.58666	4.70757	01_Water-Water_1.05.out	-152.138	-152.681	-152.691	-152.709	01_Water-Water.out	-76.0659	-76.3368	-76.3419	-76.3505	01_Water-Water.out	-76.0661	-76.3368	-76.3419	-76.3505	01_Water-Water_1.05.out	-152.13	-152.596	-152.607	-152.619	01_Water-Water.out	-76.0616	-76.294	-76.3	-76.3059	01_Water-Water.out	-76.0618	-76.294	-76.3	-76.3059
0.116659	0.168207	0.142433	0.144148	0.147055	0.132028	0.0963388	3.81047	4.56647	4.38814	4.52017	3.95344	4.58526	4.38206	4.4784	01_Water-Water_1.10.out	-152.138	-152.681	-152.691	-152.708	01_Water-Water.out	-76.0659	-76.3368	-76.3419	-76.3505	01_Water-Water.out	-76.0661	-76.3368	-76.3419	-76.3505	01_Water-Water_1.10.out	-152.13	-152.595	-152.607	-152.619	01_Water-Water.out	-76.0616	-76.294	-76.3	-76.3059	01_Water-Water.out	-76.0618	-76.294	-76.3	-76.3059
0.0589744	0.0915633	0.0752689	0.072632	0.0749636	0.066525	0.0464832	3.16875	3.55195	3.44978	3.51631	3.28944	3.63707	3.5156	3.56208	01_Water-Water_1.25.out	-152.137	-152.679	-152.689	-152.707	01_Water-Water.out	-76.0659	-76.3368	-76.3419	-76.3505	01_Water-Water.out	-76.0661	-76.3368	-76.3419	-76.3505	01_Water-Water_1.25.out	-152.129	-152.594	-152.606	-152.617	01_Water-Water.out	-76.0616	-76.294	-76.3	-76.3059	01_Water-Water.out	-76.0618	-76.294	-76.3	-76.3059
0.0129851	0.0298004	0.0213928	0.0191533	0.0209961	0.0175429	0.00934151	2.07756	2.19125	2.14411	2.16166	2.15394	2.27699	2.21735	2.22669	01_Water-Water_1.50.out	-152.135	-152.677	-152.687	-152.704	01_Water-Water.out	-76.0659	-76.3368	-76.3419	-76.3505	01_Water-Water.out	-76.0661	-76.3368	-76.3419	-76.3505	01_Water-Water_1.50.out	-152.127	-152.592	-152.603	-152.615	01_Water-Water.out	-76.0616	-76.294	-76.3	-76.3059	01_Water-Water.out	-76.0618	-76.294	-76.3	-76.3059
-0.00502457	0.000663793	-0.00218039	-0.00390061	-0.0026552	-0.00357264	-0.00575157	0.930724	0.919283	0.905006	0.901433	0.955241	0.94486	0.924069	0.918317	01_Water-Water_2.00.out	-152.134	-152.675	-152.685	-152.702	01_Water-Water.out	-76.0659	-76.3368	-76.3419	-76.3505	01_Water-Water.out	-76.0661	-76.3368	-76.3419	-76.3505	01_Water-Water_2.00.out	-152.125	-152.59	-152.601	-152.613	01_Water-Water.out	-76.0616	-76.294	-76.3	-76.3059	01_Water-Water.out	-76.0618	-76.294	-76.3	-76.3059
0.340672	0.446782	0.393727	0.430388	0.428449	0.3942	0.312858	2.84822	5.48209	4.88222	5.27642	3.05864	5.27097	4.67173	4.98459	02_Water-MeOH_0.90.out	-191.171	-191.886	-191.907	-191.933	02_Water-MeOH.out	-76.0659	-76.3368	-76.3418	-76.3504	02_Water-MeOH.out	-115.1	-115.54	-115.558	-115.574	02_Water-MeOH_0.90.out	-191.159	-191.774	-191.799	-191.817	02_Water-MeOH.out	-76.0616	-76.294	-76.2999	-76.3059	02_Water-MeOH.out	-115.092	-115.471	-115.492	-115.503
0.293161	0.386101	0.339631	0.364953	0.364657	0.334268	0.262094	3.57625	5.76806	5.27654	5.61081	3.79751	5.64496	5.14899	5.41108	02_Water-MeOH_0.95.out	-191.172	-191.886	-191.908	-191.933	02_Water-MeOH.out	-76.0659	-76.3368	-76.3418	-76.3504	02_Water-MeOH.out	-115.1	-115.54	-115.558	-115.574	02_Water-MeOH_0.95.out	-191.16	-191.774	-191.8	-191.818	02_Water-MeOH.out	-76.0616	-76.294	-76.2999	-76.3059	02_Water-MeOH.out	-115.092	-115.471	-115.492	-115.503
0.249918	0.330937	0.290428	0.306715	0.30739	0.280926	0.218074	3.91424	5.73413	5.3306	5.61152	4.13853	5.68335	5.27234	5.49042	02_Water-MeOH_1.00.out	-191.172	-191.886	-191.908	-191.933	02_Water-MeOH.out	-76.0659	-76.3368	-76.3418	-76.3504	02_Water-MeOH.out	-115.1	-115.54	-115.558	-115.574	02_Water-MeOH_1.00.out	-191.161	-191.774	-191.8	-191.818	02_Water-MeOH.out	-76.0616	-76.294	-76.2999	-76.3059	02_Water-MeOH.out	-115.092	-115.471	-115.492	-115.503
0.211178	0.281418	0.246298	0.255737	0.256905	0.234234	0.180391	4.00027	5.50906	5.17669	5.41092	4.2213	5.51562	5.17418	5.35457	02_Water-MeOH_1.05.out	-191.172	-191.886	-191.908	-191.933	02_Water-MeOH.out	-76.0659	-76.3368	-76.3418	-76.3504	02_Water-MeOH.out	-115.1	-115.54	-115.558	-115.574	02_Water-MeOH_1.05.out	-191.161	-191.774	-191.8	-191.818	02_Water-MeOH.out	-76.0616	-76.294	-76.2999	-76.3059	02_Water-MeOH.out	-115.092	-115.471	-115.492	-115.503
0.177085	0.237747	0.207416	0.211973	0.213361	0.19415	0.148522	3.92795	5.17906	4.90383	5.09798	4.1411	5.2284	4.94353	5.09205	02_Water-MeOH_1.10.out	-191.172	-191.885	-191.907	-191.932	02_Water-MeOH.out	-76.0659	-76.3368	-76.3418	-76.3504	02_Water-MeOH.out	-115.1	-115.54	-115.558	-115.574	02_Water-MeOH_1.10.out	-191.161	-191.773	-191.799	-191.817	02_Water-MeOH.out	-76.0616	-76.294	-76.2999	-76.3059	02_Water-MeOH.out	-115.092	-115.471	-115.492	-115.503
0.0999095	0.13884	0.119375	0.117587	0.11927	0.1077	0.0802204	3.30066	4.01879	3.85634	3.96404	3.47673	4.12685	3.95575	4.03597	02_Water-MeOH_1.25.out	-191.171	-191.883	-191.906	-191.93	02_Water-MeOH.out	-76.0659	-76.3368	-76.3418	-76.3504	02_Water-MeOH.out	-115.1	-115.54	-115.558	-115.574	02_Water-MeOH_1.25.out	-191.16	-191.772	-191.798	-191.816	02_Water-MeOH.out	-76.0616	-76.294	-76.2999	-76.3059	02_Water-MeOH.out	-115.092	-115.471	-115.492	-115.503
0.0328652	0.0527699	0.0428175	0.0405626	0.0427816	0.0371521	0.023782	2.16397	2.45378	2.37705	2.4142	2.27586	2.5463	2.46366	2.48745	02_Water-MeOH_1.50.out	-191.169	-191.881	-191.903	-191.928	02_Water-MeOH.out	-76.0659	-76.3368	-76.3418	-76.3504	02_Water-MeOH.out	-115.1	-115.54	-115.558	-115.574	02_Water-MeOH_1.50.out	-191.158	-191.769	-191.796	-191.813	02_Water-MeOH.out	-76.0616	-76.294	-76.2999	-76.3059	02_Water-MeOH.out	-115.092	-115.471	-115.492	-115.503
-0.000796645	0.00608967	0.00264651	0.000434158	0.00242531	0.000397653	-0.00441804	0.951592	0.990191	0.967495	0.967893	0.987683	1.00849	0.98219	0.977772	02_Water-MeOH_2.00.out	-191.167	-191.879	-191.901	-191.926	02_Water-MeOH.out	-76.0659	-76.3368	-76.3418	-76.3504	02_Water-MeOH.out	-115.1	-115.54	-115.558	-115.574	02_Water-MeOH_2.00.out	-191.156	-191.767	-191.793	-191.811	02_Water-MeOH.out	-76.0616	-76.294	-76.2999	-76.3059	02_Water-MeOH.out	-115.092	-115.471	-115.492	-115.503
0.438714	0.530756	0.484735	0.540563	0.536257	0.495112	0.397392	3.78533	7.04425	6.2096	6.70471	4.06777	6.78256	5.92258	6.31997	03_Water-MeNH2_0.90.out	-171.333	-172.023	-172.05	-172.075	03_Water-MeNH2.out	-76.0656	-76.3367	-76.3417	-76.3504	03_Water-MeNH2.out	-95.2612	-95.675	-95.6984	-95.714	03_Water-MeNH2_0.90.out	-171.322	-171.917	-171.948	-171.967	03_Water-MeNH2.out	-76.0613	-76.2939	-76.2999	-76.3058	03_Water-MeNH2.out	-95.2539	-95.6119	-95.6389	-95.6507
0.383715	0.464634	0.424175	0.46733	0.464611	0.428036	0.341171	4.59721	7.33522	6.63914	7.06717	4.88422	7.15373	6.42764	6.76881	03_Water-MeNH2_0.95.out	-171.334	-172.023	-172.051	-172.076	03_Water-MeNH2.out	-76.0656	-76.3367	-76.3417	-76.3504	03_Water-MeNH2.out	-95.2612	-95.675	-95.6984	-95.714	03_Water-MeNH2_0.95.out	-171.323	-171.917	-171.949	-171.967	03_Water-MeNH2.out	-76.0613	-76.2939	-76.2999	-76.3058	03_Water-MeNH2.out	-95.2539	-95.6119	-95.6389	-95.6507
0.333052	0.404059	0.368555	0.400942	0.399337	0.36723	0.290977	4.97415	7.27048	6.68922	7.05645	5.25672	7.15407	6.54039	6.83137	03_Water-MeNH2_1.00.out	-171.335	-172.023	-172.051	-172.076	03_Water-MeNH2.out	-76.0656	-76.3367	-76.3417	-76.3504	03_Water-MeNH2.out	-95.2612	-95.675	-95.6984	-95.714	03_Water-MeNH2_1.00.out	-171.324	-171.917	-171.949	-171.967	03_Water-MeNH2.out	-76.0613	-76.2939	-76.2999	-76.3058	03_Water-MeNH2.out	-95.2539	-95.6119	-95.6389	-95.6507
0.286976	0.349116	0.318046	0.341571	0.340621	0.312851	0.246898	5.06376	6.98719	6.50065	6.8135	5.33524	6.92373	6.40403	6.65093	03_Water-MeNH2_1.05.out	-171.335	-172.023	-172.05	-172.075	03_Water-MeNH2.out	-76.0656	-76.3367	-76.3417	-76.3504	03_Water-MeNH2.out	-95.2612	-95.675	-95.6984	-95.714	03_Water-MeNH2_1.05.out	-171.324	-171.917	-171.949	-171.967	03_Water-MeNH2.out	-76.0613	-76.2939	-76.2999	-76.3058	03_Water-MeNH2.out	-95.2539	-95.6119	-95.6389	-95.6507
0.245746	0.300065	0.272906	0.2894	0.288752	0.265067	0.208814	4.96815	6.57936	6.1704	6.43546	5.22403	6.55813	6.1164	6.32521	03_Water-MeNH2_1.10.out	-171.335	-172.022	-172.05	-172.075	03_Water-MeNH2.out	-76.0656	-76.3367	-76.3417	-76.3504	03_Water-MeNH2.out	-95.2612	-95.675	-95.6984	-95.714	03_Water-MeNH2_1.10.out	-171.324	-171.916	-171.948	-171.967	03_Water-MeNH2.out	-76.0613	-76.2939	-76.2999	-76.3058	03_Water-MeNH2.out	-95.2539	-95.6119	-95.6389	-95.6507
0.149302	0.186054	0.167678	0.171973	0.171441	0.157513	0.124435	4.17903	5.1321	4.88103	5.03854	4.37708	5.18323	4.90399	5.02842	03_Water-MeNH2_1.25.out	-171.333	-172.02	-172.048	-172.072	03_Water-MeNH2.out	-76.0656	-76.3367	-76.3417	-76.3504	03_Water-MeNH2.out	-95.2612	-95.675	-95.6984	-95.714	03_Water-MeNH2_1.25.out	-171.322	-171.914	-171.947	-171.965	03_Water-MeNH2.out	-76.0613	-76.2939	-76.2999	-76.3058	03_Water-MeNH2.out	-95.2539	-95.6119	-95.6389	-95.6507
0.0593132	0.080429	0.0698711	0.069779	0.0701702	0.0639119	0.0490486	2.71554	3.13	3.00334	3.06725	2.82225	3.18088	3.03764	3.08669	03_Water-MeNH2_1.50.out	-171.331	-172.017	-172.045	-172.069	03_Water-MeNH2.out	-76.0656	-76.3367	-76.3417	-76.3504	03_Water-MeNH2.out	-95.2612	-95.675	-95.6984	-95.714	03_Water-MeNH2_1.50.out	-171.32	-171.911	-171.944	-171.961	03_Water-MeNH2.out	-76.0613	-76.2939	-76.2999	-76.3058	03_Water-MeNH2.out	-95.2539	-95.6119	-95.6389	-95.6507
0.00715305	0.0157604	0.0114567	0.00858414	0.0101283	0.00786238	0.00248074	1.1179	1.19798	1.15792	1.16579	1.13144	1.18366	1.14042	1.1429	03_Water-MeNH2_2.00.out	-171.329	-172.014	-172.042	-172.066	03_Water-MeNH2.out	-76.0656	-76.3367	-76.3417	-76.3504	03_Water-MeNH2.out	-95.2612	-95.675	-95.6984	-95.714	03_Water-MeNH2_2.00.out	-171.317	-171.908	-171.941	-171.958	03_Water-MeNH2.out	-76.0613	-76.2939	-76.2999	-76.3058	03_Water-MeNH2.out	-95.2539	-95.6119	-95.6389	-95.6507
0.388985	0.536862	0.462923	0.504447	0.50795	0.462032	0.352977	4.86682	7.75448	7.20239	7.66443	5.03683	7.31654	6.8036	7.15658	04_Water-Peptide_0.90.out	-323.192	-324.441	-324.474	-324.527	04_Water-Peptide.out	-76.0657	-76.3367	-76.3418	-76.3504	04_Water-Peptide.out	-247.118	-248.092	-248.121	-248.164	04_Water-Peptide_0.90.out	-323.17	-324.251	-324.292	-324.332	04_Water-Peptide.out	-76.0614	-76.294	-76.2999	-76.3058	04_Water-Peptide.out	-247.1	-247.945	-247.981	-248.015
0.343613	0.475664	0.409639	0.437936	0.442422	0.401114	0.303007	5.67573	8.11068	7.66059	8.0617	5.8648	7.79246	7.3702	7.67321	04_Water-Peptide_0.95.out	-323.193	-324.442	-324.475	-324.527	04_Water-Peptide.out	-76.0657	-76.3367	-76.3418	-76.3504	04_Water-Peptide.out	-247.118	-248.092	-248.121	-248.164	04_Water-Peptide_0.95.out	-323.171	-324.251	-324.292	-324.333	04_Water-Peptide.out	-76.0614	-76.294	-76.2999	-76.3058	04_Water-Peptide.out	-247.1	-247.945	-247.981	-248.015
0.300321	0.417715	0.359018	0.376508	0.381342	0.34485	0.258183	6.03912	8.0838	7.71846	8.06331	6.23958	7.86992	7.52339	7.78157	04_Water-Peptide_1.00.out	-323.194	-324.442	-324.475	-324.527	04_Water-Peptide.out	-76.0657	-76.3367	-76.3418	-76.3504	04_Water-Peptide.out	-247.118	-248.092	-248.121	-248.164	04_Water-Peptide_1.00.out	-323.172	-324.251	-324.293	-324.333	04_Water-Peptide.out	-76.0614	-76.294	-76.2999	-76.3058	04_Water-Peptide.out	-247.1	-247.945	-247.981	-248.015
0.259922	0.363732	0.311827	0.320884	0.32561	0.293903	0.2186	6.10907	7.81994	7.52432	7.81823	6.31432	7.69437	7.41046	7.62906	04_Water-Peptide_1.05.out	-323.194	-324.441	-324.474	-324.527	04_Water-Peptide.out	-76.0657	-76.3367	-76.3418	-76.3504	04_Water-Peptide.out	-247.118	-248.092	-248.121	-248.164	04_Water-Peptide_1.05.out	-323.172	-324.251	-324.293	-324.333	04_Water-Peptide.out	-76.0614	-76.294	-76.2999	-76.3058	04_Water-Peptide.out	-247.1	-247.945	-247.981	-248.015
0.223091	0.314502	0.268797	0.271648	0.276027	0.248807	0.18416	5.99048	7.41942	7.18037	7.42918	6.19511	7.36505	7.13232	7.31648	04_Water-Peptide_1.10.out	-323.194	-324.44	-324.474	-324.526	04_Water-Peptide.out	-76.0657	-76.3367	-76.3418	-76.3504	04_Water-Peptide.out	-247.118	-248.092	-248.121	-248.164	04_Water-Peptide_1.10.out	-323.172	-324.251	-324.292	-324.332	04_Water-Peptide.out	-76.0614	-76.294	-76.2999	-76.3058	04_Water-Peptide.out	-247.1	-247.945	-247.981	-248.015
0.134678	0.19621	0.165444	0.159748	0.163162	0.146316	0.106307	5.12278	5.95021	5.82315	5.96946	5.30514	6.0161	5.88673	5.99304	04_Water-Peptide_1.25.out	-323.192	-324.438	-324.472	-324.524	04_Water-Peptide.out	-76.0657	-76.3367	-76.3418	-76.3504	04_Water-Peptide.out	-247.118	-248.092	-248.121	-248.164	04_Water-Peptide_1.25.out	-323.17	-324.248	-324.29	-324.33	04_Water-Peptide.out	-76.0614	-76.294	-76.2999	-76.3058	04_Water-Peptide.out	-247.1	-247.945	-247.981	-248.015
0.0494736	0.0814559	0.0654647	0.0599483	0.0635373	0.0549077	0.0344126	3.51292	3.83374	3.78822	3.84313	3.63628	3.91548	3.86608	3.90049	04_Water-Peptide_1.50.out	-323.19	-324.435	-324.468	-324.521	04_Water-Peptide.out	-76.0657	-76.3367	-76.3418	-76.3504	04_Water-Peptide.out	-247.118	-248.092	-248.121	-248.164	04_Water-Peptide_1.50.out	-323.168	-324.245	-324.287	-324.327	04_Water-Peptide.out	-76.0614	-76.294	-76.2999	-76.3058	04_Water-Peptide.out	-247.1	-247.945	-247.981	-248.015
-0.00376481	0.00652579	0.00138049	-0.00320057	0.000375963	-0.00293146	-0.0107866	1.46953	1.45429	1.45626	1.45332	1.49894	1.44753	1.44837	1.43758	04_Water-Peptide_2.00.out	-323.186	-324.431	-324.465	-324.517	04_Water-Peptide.out	-76.0657	-76.3367	-76.3418	-76.3504	04_Water-Peptide.out	-247.118	-248.092	-248.121	-248.164	04_Water-Peptide_2.00.out	-323.164	-324.241	-324.283	-324.323	04_Water-Peptide.out	-76.0614	-76.294	-76.2999	-76.3058	04_Water-Peptide.out	-247.1	-247.945	-247.981	-248.015
0.437162	0.546561	0.491861	0.539391	0.530781	0.494038	0.406774	2.46713	5.61612	4.91037	5.40441	2.70952	5.47489	4.80154	5.20831	05_MeOH-MeOH_0.90.out	-230.204	-231.089	-231.123	-231.156	05_MeOH-MeOH.out	-115.1	-115.54	-115.558	-115.574	05_MeOH-MeOH.out	-115.1	-115.54	-115.558	-115.574	05_MeOH-MeOH_0.90.out	-230.189	-230.951	-230.991	-231.015	05_MeOH-MeOH.out	-115.092	-115.471	-115.492	-115.503	05_MeOH-MeOH.out	-115.093	-115.471	-115.492	-115.503
0.379069	0.475396	0.427232	0.461697	0.455852	0.422877	0.34456	3.30024	5.94395	5.36432	5.7872	3.55063	5.87975	5.32405	5.66861	05_MeOH-MeOH_0.95.out	-230.205	-231.09	-231.124	-231.156	05_MeOH-MeOH.out	-115.1	-115.54	-115.558	-115.574	05_MeOH-MeOH.out	-115.1	-115.54	-115.558	-115.574	05_MeOH-MeOH_0.95.out	-230.19	-230.952	-230.992	-231.016	05_MeOH-MeOH.out	-115.092	-115.471	-115.492	-115.503	05_MeOH-MeOH.out	-115.093	-115.471	-115.492	-115.503
0.326284	0.410759	0.368522	0.392359	0.388427	0.359369	0.290355	3.71879	5.93451	5.45761	5.81697	3.96996	5.93478	5.47553	5.76589	05_MeOH-MeOH_1.00.out	-230.206	-231.09	-231.124	-231.156	05_MeOH-MeOH.out	-115.1	-115.54	-115.558	-115.574	05_MeOH-MeOH.out	-115.1	-115.54	-115.558	-115.574	05_MeOH-MeOH_1.00.out	-230.191	-230.952	-230.992	-231.016	05_MeOH-MeOH.out	-115.092	-115.471	-115.492	-115.503	05_MeOH-MeOH.out	-115.093	-115.471	-115.492	-115.503
0.278923	0.352634	0.315778	0.331344	0.328677	0.303484	0.243652	3.86608	5.72115	5.32755	5.63104	4.11197	5.77307	5.39254	5.6362	05_MeOH-MeOH_1.05.out	-230.206	-231.089	-231.124	-231.156	05_MeOH-MeOH.out	-115.1	-115.54	-115.558	-115.574	05_MeOH-MeOH.out	-115.1	-115.54	-115.558	-115.574	05_MeOH-MeOH_1.05.out	-230.191	-230.951	-230.992	-231.016	05_MeOH-MeOH.out	-115.092	-115.471	-115.492	-115.503	05_MeOH-MeOH.out	-115.093	-115.471	-115.492	-115.503
0.237096	0.301189	0.269143	0.278595	0.276775	0.255171	0.20386	3.83963	5.39368	5.06714	5.32231	4.07567	5.48405	5.16728	5.37114	05_MeOH-MeOH_1.10.out	-230.206	-231.089	-231.124	-231.156	05_MeOH-MeOH.out	-115.1	-115.54	-115.558	-115.574	05_MeOH-MeOH.out	-115.1	-115.54	-115.558	-115.574	05_MeOH-MeOH_1.10.out	-230.191	-230.951	-230.991	-231.015	05_MeOH-MeOH.out	-115.092	-115.471	-115.492	-115.503	05_MeOH-MeOH.out	-115.093	-115.471	-115.492	-115.503
0.141319	0.18338	0.16235	0.162884	0.162678	0.149189	0.117152	3.28884	4.21102	4.01728	4.16647	3.48201	4.34995	4.16049	4.27765	05_MeOH-MeOH_1.25.out	-230.205	-231.087	-231.122	-231.154	05_MeOH-MeOH.out	-115.1	-115.54	-115.558	-115.574	05_MeOH-MeOH.out	-115.1	-115.54	-115.558	-115.574	05_MeOH-MeOH_1.25.out	-230.19	-230.949	-230.99	-231.013	05_MeOH-MeOH.out	-115.092	-115.471	-115.492	-115.503	05_MeOH-MeOH.out	-115.093	-115.471	-115.492	-115.503
0.0550452	0.0776543	0.0663498	0.0645521	0.0660661	0.0591245	0.0426383	2.18473	2.58506	2.49217	2.55129	2.30708	2.69535	2.60356	2.64619	05_MeOH-MeOH_1.50.out	-230.204	-231.084	-231.119	-231.151	05_MeOH-MeOH.out	-115.1	-115.54	-115.558	-115.574	05_MeOH-MeOH.out	-115.1	-115.54	-115.558	-115.574	05_MeOH-MeOH_1.50.out	-230.188	-230.947	-230.987	-231.011	05_MeOH-MeOH.out	-115.092	-115.471	-115.492	-115.503	05_MeOH-MeOH.out	-115.093	-115.471	-115.492	-115.503
0.0062879	0.0147099	0.0104989	0.00793591	0.00988868	0.00726865	0.00104608	0.967839	1.04426	1.0153	1.02257	1.00778	1.06685	1.03736	1.0384	05_MeOH-MeOH_2.00.out	-230.202	-231.082	-231.117	-231.149	05_MeOH-MeOH.out	-115.1	-115.54	-115.558	-115.574	05_MeOH-MeOH.out	-115.1	-115.54	-115.558	-115.574	05_MeOH-MeOH_2.00.out	-230.186	-230.944	-230.985	-231.008	05_MeOH-MeOH.out	-115.092	-115.471	-115.492	-115.503	05_MeOH-MeOH.out	-115.093	-115.471	-115.492	-115.503
0.662658	0.766457	0.714557	0.786944	0.773119	0.720776	0.596464	2.94361	7.56498	6.44439	7.16517	3.31009	7.3743	6.27914	6.8756	06_MeOH-MeNH2_0.90.out	-210.365	-211.227	-211.266	-211.299	06_MeOH-MeNH2.out	-115.099	-115.54	-115.557	-115.573	06_MeOH-MeNH2.out	-95.2612	-95.675	-95.6984	-95.714	06_MeOH-MeNH2_0.90.out	-210.351	-211.095	-211.14	-211.165	06_MeOH-MeNH2.out	-115.092	-115.471	-115.491	-115.503	06_MeOH-MeNH2.out	-95.2539	-95.6119	-95.6389	-95.6507
0.583199	0.674616	0.628907	0.685601	0.674626	0.627954	0.517109	4.04795	7.96524	7.02696	7.65492	4.414	7.85393	6.93054	7.44765	06_MeOH-MeNH2_0.95.out	-210.367	-211.228	-211.267	-211.3	06_MeOH-MeNH2.out	-115.099	-115.54	-115.557	-115.573	06_MeOH-MeNH2.out	-95.2612	-95.675	-95.6984	-95.714	06_MeOH-MeNH2_0.95.out	-210.353	-211.095	-211.141	-211.166	06_MeOH-MeNH2.out	-115.092	-115.471	-115.491	-115.503	06_MeOH-MeNH2.out	-95.2539	-95.6119	-95.6389	-95.6507
0.510337	0.590694	0.550515	0.593826	0.585138	0.543897	0.445949	4.63623	7.95244	7.16663	7.71053	4.99345	7.90458	7.12587	7.57182	06_MeOH-MeNH2_1.00.out	-210.368	-211.228	-211.267	-211.3	06_MeOH-MeNH2.out	-115.099	-115.54	-115.557	-115.573	06_MeOH-MeNH2.out	-95.2612	-95.675	-95.6984	-95.714	06_MeOH-MeNH2_1.00.out	-210.354	-211.095	-211.142	-211.166	06_MeOH-MeNH2.out	-115.092	-115.471	-115.491	-115.503	06_MeOH-MeNH2.out	-95.2539	-95.6119	-95.6389	-95.6507
0.444113	0.514461	0.479287	0.511536	0.504543	0.468526	0.382985	4.87743	7.6822	7.02329	7.49182	5.21935	7.68535	7.0279	7.41088	06_MeOH-MeNH2_1.05.out	-210.368	-211.227	-211.267	-211.299	06_MeOH-MeNH2.out	-115.099	-115.54	-115.557	-115.573	06_MeOH-MeNH2.out	-95.2612	-95.675	-95.6984	-95.714	06_MeOH-MeNH2_1.05.out	-210.354	-211.095	-211.141	-211.166	06_MeOH-MeNH2.out	-115.092	-115.471	-115.491	-115.503	06_MeOH-MeNH2.out	-95.2539	-95.6119	-95.6389	-95.6507
0.384729	0.446105	0.415417	0.438825	0.433019	0.401928	0.328087	4.88875	7.26173	6.70756	7.10948	5.2108	7.30502	6.74829	7.07638	06_MeOH-MeNH2_1.10.out	-210.368	-211.226	-211.267	-211.299	06_MeOH-MeNH2.out	-115.099	-115.54	-115.557	-115.573	06_MeOH-MeNH2.out	-95.2612	-95.675	-95.6984	-95.714	06_MeOH-MeNH2_1.10.out	-210.354	-211.094	-211.141	-211.165	06_MeOH-MeNH2.out	-115.092	-115.471	-115.491	-115.503	06_MeOH-MeNH2.out	-95.2539	-95.6119	-95.6389	-95.6507
0.244416	0.285084	0.26475	0.272373	0.268537	0.249472	0.204192	4.25701	5.70411	5.36551	5.61498	4.50755	5.81245	5.46517	5.66937	06_MeOH-MeNH2_1.25.out	-210.367	-211.224	-211.264	-211.296	06_MeOH-MeNH2.out	-115.099	-115.54	-115.557	-115.573	06_MeOH-MeNH2.out	-95.2612	-95.675	-95.6984	-95.714	06_MeOH-MeNH2_1.25.out	-210.353	-211.092	-211.139	-211.163	06_MeOH-MeNH2.out	-115.092	-115.471	-115.491	-115.503	06_MeOH-MeNH2.out	-95.2539	-95.6119	-95.6389	-95.6507
0.108954	0.131511	0.120232	0.12106	0.119815	0.110881	0.0896627	2.83026	3.49362	3.32585	3.43673	2.96915	3.58547	3.40964	3.4993	06_MeOH-MeNH2_1.50.out	-210.365	-211.22	-211.261	-211.293	06_MeOH-MeNH2.out	-115.099	-115.54	-115.557	-115.573	06_MeOH-MeNH2.out	-95.2612	-95.675	-95.6984	-95.714	06_MeOH-MeNH2_1.50.out	-210.351	-211.088	-211.136	-211.159	06_MeOH-MeNH2.out	-115.092	-115.471	-115.491	-115.503	06_MeOH-MeNH2.out	-95.2539	-95.6119	-95.6389	-95.6507
0.0215083	0.0314289	0.0264686	0.0233599	0.0246929	0.0213958	0.0135652	1.18111	1.33705	1.28272	1.30412	1.20119	1.33003	1.27559	1.28916	06_MeOH-MeNH2_2.00.out	-210.362	-211.217	-211.258	-211.289	06_MeOH-MeNH2.out	-115.099	-115.54	-115.557	-115.573	06_MeOH-MeNH2.out	-95.2612	-95.675	-95.6984	-95.714	06_MeOH-MeNH2_2.00.out	-210.348	-211.085	-211.132	-211.156	06_MeOH-MeNH2.out	-115.092	-115.471	-115.491	-115.503	06_MeOH-MeNH2.out	-95.2539	-95.6119	-95.6389	-95.6507
0.58428	0.74591	0.665095	0.730962	0.716429	0.669502	0.55805	3.97654	7.81431	7.05155	7.72105	4.22486	7.47587	6.78107	7.33912	07_MeOH-Peptide_0.90.out	-362.225	-363.644	-363.69	-363.75	07_MeOH-Peptide.out	-115.1	-115.54	-115.558	-115.573	07_MeOH-Peptide.out	-247.119	-248.092	-248.121	-248.164	07_MeOH-Peptide_0.90.out	-362.199	-363.428	-363.483	-363.53	07_MeOH-Peptide.out	-115.092	-115.471	-115.491	-115.503	07_MeOH-Peptide.out	-247.101	-247.945	-247.981	-248.015
0.522049	0.667158	0.594603	0.644379	0.633048	0.590199	0.488432	4.94737	8.24442	7.60964	8.19983	5.2043	8.00493	7.426	7.91443	07_MeOH-Peptide_0.95.out	-362.226	-363.645	-363.69	-363.751	07_MeOH-Peptide.out	-115.1	-115.54	-115.558	-115.573	07_MeOH-Peptide.out	-247.119	-248.092	-248.121	-248.164	07_MeOH-Peptide_0.95.out	-362.201	-363.429	-363.484	-363.531	07_MeOH-Peptide.out	-115.092	-115.471	-115.491	-115.503	07_MeOH-Peptide.out	-247.101	-247.945	-247.981	-248.015
0.463129	0.592967	0.528048	0.564314	0.555327	0.516865	0.425518	5.43615	8.26247	7.73501	8.25187	5.69557	8.11091	7.62914	8.05466	07_MeOH-Peptide_1.00.out	-362.227	-363.645	-363.691	-363.751	07_MeOH-Peptide.out	-115.1	-115.54	-115.558	-115.573	07_MeOH-Peptide.out	-247.119	-248.092	-248.121	-248.164	07_MeOH-Peptide_1.00.out	-362.202	-363.429	-363.485	-363.531	07_MeOH-Peptide.out	-115.092	-115.471	-115.491	-115.503	07_MeOH-Peptide.out	-247.101	-247.945	-247.981	-248.015
0.40824	0.523864	0.466052	0.491409	0.484099	0.450091	0.36932	5.60284	8.02201	7.58379	8.03388	5.85926	7.94576	7.5448	7.91412	07_MeOH-Peptide_1.05.out	-362.227	-363.645	-363.69	-363.75	07_MeOH-Peptide.out	-115.1	-115.54	-115.558	-115.573	07_MeOH-Peptide.out	-247.119	-248.092	-248.121	-248.164	07_MeOH-Peptide_1.05.out	-362.202	-363.429	-363.484	-363.531	07_MeOH-Peptide.out	-115.092	-115.471	-115.491	-115.503	07_MeOH-Peptide.out	-247.101	-247.945	-247.981	-248.015
0.358028	0.460566	0.409297	0.42625	0.420177	0.390411	0.319714	5.55813	7.62892	7.26407	7.65448	5.807	7.61345	7.27902	7.59873	07_MeOH-Peptide_1.10.out	-362.227	-363.644	-363.69	-363.75	07_MeOH-Peptide.out	-115.1	-115.54	-115.558	-115.573	07_MeOH-Peptide.out	-247.119	-248.092	-248.121	-248.164	07_MeOH-Peptide_1.10.out	-362.202	-363.428	-363.484	-363.53	07_MeOH-Peptide.out	-115.092	-115.471	-115.491	-115.503	07_MeOH-Peptide.out	-247.101	-247.945	-247.981	-248.015
0.235783	0.306212	0.270998	0.27439	0.271147	0.251319	0.204228	4.82241	6.12995	5.91426	6.16558	5.03216	6.21207	6.01395	6.21818	07_MeOH-Peptide_1.25.out	-362.226	-363.642	-363.688	-363.747	07_MeOH-Peptide.out	-115.1	-115.54	-115.558	-115.573	07_MeOH-Peptide.out	-247.119	-248.092	-248.121	-248.164	07_MeOH-Peptide_1.25.out	-362.201	-363.426	-363.482	-363.528	07_MeOH-Peptide.out	-115.092	-115.471	-115.491	-115.503	07_MeOH-Peptide.out	-247.101	-247.945	-247.981	-248.015
0.0988963	0.133204	0.11605	0.114169	0.115425	0.104569	0.0787867	3.08355	3.63694	3.54788	3.65245	3.20637	3.70644	3.62775	3.70653	07_MeOH-Peptide_1.50.out	-362.223	-363.638	-363.684	-363.743	07_MeOH-Peptide.out	-115.1	-115.54	-115.558	-115.573	07_MeOH-Peptide.out	-247.119	-248.092	-248.121	-248.164	07_MeOH-Peptide_1.50.out	-362.198	-363.422	-363.478	-363.524	07_MeOH-Peptide.out	-115.092	-115.471	-115.491	-115.503	07_MeOH-Peptide.out	-247.101	-247.945	-247.981	-248.015
0.0109429	0.0194015	0.0151722	0.010621	0.0131729	0.00972798	0.00154636	1.04713	1.09994	1.08628	1.09601	1.06518	1.0811	1.07249	1.07404	07_MeOH-Peptide_2.00.out	-362.22	-363.634	-363.68	-363.739	07_MeOH-Peptide.out	-115.1	-115.54	-115.558	-115.573	07_MeOH-Peptide.out	-247.119	-248.092	-248.121	-248.164	07_MeOH-Peptide_2.00.out	-362.194	-363.418	-363.474	-363.52	07_MeOH-Peptide.out	-115.092	-115.471	-115.491	-115.503	07_MeOH-Peptide.out	-247.101	-247.945	-247.981	-248.015
0.321983	0.421886	0.371935	0.40318	0.399758	0.36928	0.296894	2.65459	4.84947	4.35138	4.72066	2.80049	4.67014	4.17795	4.47484	08_MeOH-Water_0.90.out	-191.17	-191.885	-191.907	-191.932	08_MeOH-Water.out	-115.1	-115.54	-115.558	-115.574	08_MeOH-Water.out	-76.0661	-76.3368	-76.3419	-76.3505	08_MeOH-Water_0.90.out	-191.159	-191.772	-191.798	-191.816	08_MeOH-Water.out	-115.092	-115.471	-115.492	-115.503	08_MeOH-Water.out	-76.0618	-76.294	-76.3	-76.3059
0.273585	0.362373	0.317979	0.337903	0.336676	0.309492	0.24493	3.35729	5.15069	4.75064	5.06013	3.51855	5.0518	4.65102	4.89595	08_MeOH-Water_0.95.out	-191.171	-191.885	-191.907	-191.932	08_MeOH-Water.out	-115.1	-115.54	-115.558	-115.574	08_MeOH-Water.out	-76.0661	-76.3368	-76.3419	-76.3505	08_MeOH-Water_0.95.out	-191.16	-191.773	-191.799	-191.817	08_MeOH-Water.out	-115.092	-115.471	-115.492	-115.503	08_MeOH-Water.out	-76.0618	-76.294	-76.3	-76.3059
0.230614	0.308998	0.269806	0.280899	0.281037	0.257281	0.200859	3.68857	5.14967	4.82728	5.08456	3.85757	5.11746	4.79024	4.99109	08_MeOH-Water_1.00.out	-191.172	-191.885	-191.907	-191.932	08_MeOH-Water.out	-115.1	-115.54	-115.558	-115.574	08_MeOH-Water.out	-76.0661	-76.3368	-76.3419	-76.3505	08_MeOH-Water_1.00.out	-191.16	-191.773	-191.799	-191.817	08_MeOH-Water.out	-115.092	-115.471	-115.492	-115.503	08_MeOH-Water.out	-76.0618	-76.294	-76.3	-76.3059
0.192867	0.261581	0.227224	0.231802	0.232684	0.212312	0.163927	3.78004	4.9676	4.70654	4.91885	3.95022	4.98856	4.72034	4.88427	08_MeOH-Water_1.05.out	-191.172	-191.885	-191.907	-191.932	08_MeOH-Water.out	-115.1	-115.54	-115.558	-115.574	08_MeOH-Water.out	-76.0661	-76.3368	-76.3419	-76.3505	08_MeOH-Water_1.05.out	-191.16	-191.773	-191.799	-191.817	08_MeOH-Water.out	-115.092	-115.471	-115.492	-115.503	08_MeOH-Water.out	-76.0618	-76.294	-76.3	-76.3059
0.160171	0.220126	0.190149	0.190244	0.191477	0.174248	0.133331	3.72058	4.68513	4.47223	4.64648	3.88679	4.7459	4.52474	4.65807	08_MeOH-Water_1.10.out	-191.172	-191.884	-191.907	-191.931	08_MeOH-Water.out	-115.1	-115.54	-115.558	-115.574	08_MeOH-Water.out	-76.0661	-76.3368	-76.3419	-76.3505	08_MeOH-Water_1.10.out	-191.16	-191.773	-191.799	-191.817	08_MeOH-Water.out	-115.092	-115.471	-115.492	-115.503	08_MeOH-Water.out	-76.0618	-76.294	-76.3	-76.3059
0.0879241	0.12779	0.107857	0.102653	0.104138	0.0940221	0.0699963	3.1476	3.66459	3.54324	3.63727	3.2859	3.78054	3.65077	3.72077	08_MeOH-Water_1.25.out	-191.171	-191.883	-191.905	-191.93	08_MeOH-Water.out	-115.1	-115.54	-115.558	-115.574	08_MeOH-Water.out	-76.0661	-76.3368	-76.3419	-76.3505	08_MeOH-Water_1.25.out	-191.159	-191.771	-191.797	-191.815	08_MeOH-Water.out	-115.092	-115.471	-115.492	-115.503	08_MeOH-Water.out	-76.0618	-76.294	-76.3	-76.3059
0.0276889	0.0503473	0.0390181	0.0341015	0.0357285	0.0312342	0.0205602	2.08733	2.26897	2.21286	2.2441	2.17391	2.37091	2.30827	2.32883	08_MeOH-Water_1.50.out	-191.169	-191.881	-191.903	-191.928	08_MeOH-Water.out	-115.1	-115.54	-115.558	-115.574	08_MeOH-Water.out	-76.0661	-76.3368	-76.3419	-76.3505	08_MeOH-Water_1.50.out	-191.158	-191.769	-191.795	-191.813	08_MeOH-Water.out	-115.092	-115.471	-115.492	-115.503	08_MeOH-Water.out	-76.0618	-76.294	-76.3	-76.3059
-0.000731728	0.0083088	0.00378854	0.000442684	0.00173306	0.000405463	-0.00274758	0.939995	0.950074	0.93254	0.932945	0.967584	0.978664	0.957336	0.954589	08_MeOH-Water_2.00.out	-191.168	-191.878	-191.901	-191.926	08_MeOH-Water.out	-115.1	-115.54	-115.558	-115.574	08_MeOH-Water.out	-76.0661	-76.3368	-76.3419	-76.3505	08_MeOH-Water_2.00.out	-191.156	-191.767	-191.793	-191.811	08_MeOH-Water.out	-115.092	-115.471	-115.492	-115.503	08_MeOH-Water.out	-76.0618	-76.294	-76.3	-76.3059
0.40533	0.484142	0.444736	0.460023	0.456263	0.421344	0.338411	0.0316096	2.79722	2.28685	2.70819	0.266744	2.71682	2.24073	2.57914	09_MeNH2-MeOH_0.90.out	-210.361	-211.22	-211.26	-211.292	09_MeNH2-MeOH.out	-95.2611	-95.675	-95.6984	-95.714	09_MeNH2-MeOH.out	-115.1	-115.54	-115.558	-115.574	09_MeNH2-MeOH_0.90.out	-210.347	-211.087	-211.134	-211.158	09_MeNH2-MeOH.out	-95.2539	-95.6119	-95.6388	-95.6507	09_MeNH2-MeOH.out	-115.093	-115.471	-115.492	-115.503
0.33853	0.405358	0.371944	0.379412	0.376379	0.34751	0.278948	0.747361	3.0083	2.59935	2.94686	0.970283	2.99852	2.61657	2.89552	09_MeNH2-MeOH_0.95.out	-210.362	-211.22	-211.26	-211.292	09_MeNH2-MeOH.out	-95.2611	-95.675	-95.6984	-95.714	09_MeNH2-MeOH.out	-115.1	-115.54	-115.558	-115.574	09_MeNH2-MeOH_0.95.out	-210.348	-211.088	-211.135	-211.159	09_MeNH2-MeOH.out	-95.2539	-95.6119	-95.6388	-95.6507	09_MeNH2-MeOH.out	-115.093	-115.471	-115.492	-115.503
[truncated: 462 more rows]

## Sheet: attempt at best estimates
																		ATDEXX	TDEXX	ALDA	Hobza		MSD from STERLING	(positive means overbinding)
						Table 1		Opus279, Table 7															ATDEXX	TDEXX	ALDA	Hobza
[truncated: 536 more rows]

## Sheet: DF-MP2-F12 aVnZ-F12
100	/work/golokesh/projects/S66x8/DF-MP2-F12														From Table 2 opus268
[truncated: 540 more rows]

[truncated: 1 more sheets: Hesselmann SAPT(DFT)]
