# Supplementary material for: S66x8 noncovalent interactions revisited: new benchmark and performance of composite localized coupled-cluster methods
Source: Royal Society of Chemistry journal article supplement (doi:10.1039/d2cp03938a), 2022-01-01
Supplement: d2cp03938a1.zip [file Timing Data.xlsx]

## Sheet: Timing
Wall clock timings for system 26 (stacked uracil dimer) at 1.0re
All these calculations were carried out on 8 cores of an 2.4GHz Intel Xeon Gold Intel(R) Xeon(R) Gold 6240R “Cascade Lake” node with 192GB of RAM — the ORCA jobs, which are more demanding in terms of I/O bandwidth, were run on a machine with the same CPU and 2.9TB of striped SSD
		Wall Time (hrs.)						Wall Time (min)
Methods	Threshold	Basis set				Methods	Threshold	Basis set
		haVDZ	haVTZ	haVQZ				haVDZ	haVTZ	haVQZ
LNO-CCSD(T)	Normal	0.3024	0.9002	2.37938		LNO-CCSD(T)	Normal	18.144	54.012	142.763
	Tight	1.18425	3.73273	8.56353			Tight	71.055	223.964	513.812
	vTight	3.04877	11.3883				vTight	182.926	683.298
	vvTight	6.66639	27.4353				vvTight	399.983	1646.12
PNO-LCCSD(T)	Default	0.341447	1.61168	10.5241		PNO-LCCSD(T)	Default	20.4868	96.7008	631.446
	Tight	0.602194	3.45841	21.5122			Tight	36.1317	207.505	1290.73
DLPNO-CCSD(T1)	Normal	0.327222	1.46028	5.74917		DLPNO-CCSD(T1)	Normal	19.6333	87.6167	344.95
	Tight	1.44944	5.79944	23.547			Tight	86.9667	347.967	1412.82
	vTight	3.33695	14.5667				vTight	200.217	874
